# Supplementary material
Source: PubMed Central journal article supplement (PMC7059111)
Supplement: jamaoncol-6-714-s001.pdf [file jamaoncol-6-714-s001.pdf]

## Supplementary Online Content

Fehlmann T, Kahraman M, Ludwig N, et al. Evaluating the use of circulating microRNA profiles for lung cancer detection in symptomatic patients. Published online March 5, 2020. *JAMA Oncol*. doi:10.1001/jamaoncol.2020.0001

### eMethods

### eReferences

**eFigure 1.** Disease Ontology

**eFigure 2.** ROC-Analysis of Single miRNAs and miRNA Signatures for the Three Scenarios

**eFigure 3.** Heatmap for the Classification Performance for Different Age/Smoking Thresholds

**eFigure 4.** Pearson Correlation for 41 Repeated Experiments to Assess the Reproducibility

**eTable 1.** Overview of Age, Gender and Smoking Status Along With Secured Diagnoses and Tumor Stages for the Collected Samples. Available as Separate Excel File

**eTable 2.** Sample Site and Sample Profiling Distribution

**eTable 3.** Results of the ANOVA for the Four Compared Groups. Available as Separate Excel File

**eTable 4.** Result Metrics for the Comparison of Lung Cancer Cases Versus All Other Participants in the Study. Available as Separate Excel File

**eTable 5.** Signatures for the Comparison of Lung Cancer Cases Versus All Other Participants in the Study

**eTable 6.** Result Metrics for the Comparison of Lung Cancer Cases Versus Patients With Non-Cancer Lung Diseases. Available as Separate Excel File

**eTable 7.** Signatures for the Comparison of Lung Cancer Cases Versus Patients With Non-Cancer Lung Diseases

**eTable 8.** Result Metrics for the Comparison of Low Lung Cancer Stages Versus All Non-Lung-Cancer Patients. Available as Separate Excel File

**eTable 9.** Signatures for the Comparison of Low Lung Cancer Stages Versus All Non-Lung-Cancer Patients

**eTable 10.** Classification Performance for Different Age/Smoking Thresholds

**eTable 11.** PPV and NPV for a Range of Prevalence Rates

**eTable 12.** Result Metrics for the Comparison of NSCLC Versus SCLC. Available as Separate Excel File

**eTable 13.** Signature for the Comparison of NSCLC Versus SCLC

**eTable 14.** Signature Overlap Between the Three Classification Scenarios

**eTable 15.** An Overview of Studies on miRNA Expression Changes in Lung Cancer

This supplementary material has been provided by the authors to give readers additional information about their work.

## **eMethods**

### **Participants**

In total 3,102 patients were measured in this study. However, for 1.8% (56 cases) no clear clinical diagnosis was available. Thus, those samples were excluded from our analysis. As shown in eTable 2, of the remaining 3,046 samples, 2,219 were measured in Heidelberg and the remaining 827 at Saarland University. Also, samples were collected from 11 different sites and one multicenter project<sup>1</sup>, with the top 4 contributing to nearly 80% of all samples. The clinical data were not available to the researchers performing the measurements at the time the experiments were performed.

### **miRNA filtering**

We started our analysis on 2,549 miRNAs from the miRBase v21. Following an initial analysis, we filtered those miRNAs in order to improve the signal to noise ratio. First, miRNAs only available in the later miRBase version were excluded since those are frequently artifacts. Next, we also filtered those miRNAs that are not significantly over the background intensity expressed. The final data set contained 1,183 miRNAs that are likely suited as stable biomarker candidates.

### **Quantile Normalization**

We applied standard quantile normalization to make the distribution of all samples identical. Specifically, we applied quantile normalize of all distributions without a reference distribution. All samples are sorted and then the average of all values is assigned. Thereby, the highest value in all samples becomes the average of the highest values. The second highest value becomes the average of all second highest expression values. This process is iterated over all 1,183 human mature miRNAs.

### **Patient matching**

For each of the three considered scenarios, perfect patient matching was performed according to gender, smoking status (past, present and never) and age. To this end, for each patient in the lung cancer cohort a patient with same gender, smoking status and age (differing by at most 1 year) was chosen from the other cohort. Only matching pairs were retained for further analysis. The matching cohorts were determined by using the nearest neighbor matching algorithm implemented in the MatchIt R-package (version 3.0.2).

### **Gradient Boosted Trees**

All classification models were built based on the log<sub>2</sub> quantile normalized miRNA expression data. We applied gradient boosted trees using LightGBM<sup>2</sup> as classification model for all scenarios. Gradient boosted trees combine the power of multiple weak learners, in our case decision trees, to best separate the specified classes. Gradient Boosted Trees are particularly well suited for classification scenarios using miRNAs, as they are built on small trees, with the assumption that a single decision tree will not be able to capture the whole complexity of the classification problem, while adding more trees to the ensemble, will converge towards a better separation. This means that with increasing number of trees the bias of the classifier will be reduced progressively. In addition, gradient boosted trees offer many possibilities to counter overfitting, which is particularly important for generalization. Due to the ensemble approach used by gradient boosted trees, no fixed thresholds were determined for miRNAs to distinguish between the cohorts of the classification scenarios.

### **Performance evaluation**

We evaluated the performance of all classification scenarios by splitting the cohorts to compare into two equal sized groups, representing the training and the validation set, respectively. This means, the signatures were established on the training set (50% of the first cohort and 50% of the second cohort were used for the training set) and evaluated on the validation set (the remaining individuals from the respective two cohorts). The maximal difference between

training set and validation set was 1 (e.g. for the non-tumor lung disease group consisting of 593 samples, training and validation set size differed by one, containing 296 and 297 of the 593 individuals). Beyond the aforementioned setup to evaluate classifiers and signatures, we also carried out resampling on the overall cohort in order to understand the stability of the signatures. Here, the full cohort was evaluated by 5-times repeated 5-fold cross validation. Thus, a total of 25 combinations of different training and validation sets (split in respectively 80% and 20%, while retaining the cohort proportions) were considered. The reported metrics for the resampling correspond to the cross-validation performance, i.e. the mean performance (over all folds) of the algorithm on data not used for the training procedure.

### **Finding sets of relevant miRNAs with feature selection**

One of the aims of this study is to show that miRNAs could be used in a clinical context for blood testing. Therefore, we needed to restrict the set of miRNAs to only those that add valuable information to the classification model. To this end we considered two filtering approaches. In the first one, we computed ANOVA F-values for every miRNA and then considered all models using only miRNAs with the best values, i.e. the ones for which the means between the two cohorts are differing the most. Second, we computed feature importance values determined by the gradient boosted trees classifier, reflecting the number of times a miRNA was used by the classifier. We then selected those miRNAs that were selected most by the classifier. In addition to this prioritization, we restricted the number of selected miRNAs to at most 15, so that the resulting miRNA signature sizes would still be usable in practice.

### **Hyperparameter tuning and determining the best performing model**

Gradient boosted trees and in particular the implementation provided by LightGBM provide many tunable parameters to maximize classification performance. In addition to the number of miRNAs selected during feature selection, we tuned the number of trees and the number of leaves used by the model, as these are major parameters allowing to control over fitting. We kept the learning rate at its default value of 0.1, since we did not observe any improvements while tuning it. We allowed between 5 and 31 number of leaves and up to 100 trees for each model. The number of leaves were incremented in steps of five (by six for the last step, as 31 is the default number of leaves), while the number of trees were incremented by one. Additionally, as gradient boosted trees allow to compute a probability describing the confidence of the classifier in its prediction, we tuned the probability thresholds as well, using steps of 5%. All resulting parameters combinations were tested to determine the best performing model. We chose the best performing model in two steps. First, we determined which models showed the best accuracy, weighted according to the number of used features. We penalized the computed performance of each model by 0.25% for each feature used, thereby allowing models using less features, but performing only marginally worse to still be selected. Then, we determined which of all computed models could improve by at least one percent sensitivity on the previously selected model, while losing least accuracy (at most 5%). This model, was then determined to be the best performing one. For this study, we privileged more sensitive models, however, more specific models could be obtained either by changing the hyperparameter tuning to prefer specificity over sensitivity, or by shifting the probability cutoff of the selected model. Hyperparameter tuning and model selection was always only performed on the training data, and the obtained best model was used to evaluate the validation data.

### **Testing for overtraining**

To ensure that the reported classification models separate according to biological reasons and not due to batch effects or by luck we performed on one-hand side repeated cross-validation (as described above) and on the other permutation testing. Permutation testing was performed 1000 times by repeatedly shuffling the group labels of all samples and applying our classification procedure.

### **ROC computation**

The ROC curves of the classification models were computed on the average cross-validation sensitivity and specificity values. Since the probability cutoff thresholds are different for each cross-validation, we instead determined the sensitivity and specificity values by increasing the cutoff by steps of 0.02%. ROC AUC for single miRNAs were computed with the pROC R package and confidence intervals were computed using the DeLong

method.

**Batch correction**

Batch correction was performed on the log-transformed quantile normalized expression data for the study / sampling site, the site where the sample was profiled and the biochip ID. The batch effects were removed using a linear model via the `removeBatchEffect` method of the `limma` package<sup>3</sup> (version 3.34\_9). The participant group variable was explicitly not passed to the method to be preserved, since it has been shown to lead to over-optimistic downstream analyses<sup>4</sup>.

## eReferences

1. Jorres RA, Welte T, Bals R, Koch A, Schnoor M, Vogelmeier C. [Systemic manifestations and comorbidities in patients with chronic obstructive pulmonary disease (COPD) and their effect on clinical state and course of the disease--an overview of the cohort study COSYCONET]. *Dtsch Med Wochenschr.* 2010;135(10):446-449.
2. Ke G, Meng Q, Finley T, et al. LightGBM: A highly efficient gradient boosting decision tree. Paper presented at: Advances in Neural Information Processing Systems 2017.
3. Ritchie ME, Phipson B, Wu D, et al. limma powers differential expression analyses for RNA-sequencing and microarray studies. *Nucleic Acids Res.* 2015;43(7):e47.
4. Nygaard V, Rodland EA, Hovig E. Methods that remove batch effects while retaining group differences may lead to exaggerated confidence in downstream analyses. *Biostatistics.* 2016;17(1):29-39.

**eFigure 1. Disease Ontology.** The large diagram shows the cohort sizes, with the area of each circle proportional to the number of samples. On the right, the comparisons in the three scenarios described in the results section are depicted. LD = lung disease, LCa = lung cancer, NTLT = non-tumor lung disease, OD = diseases other than lung diseases, Con = controls.

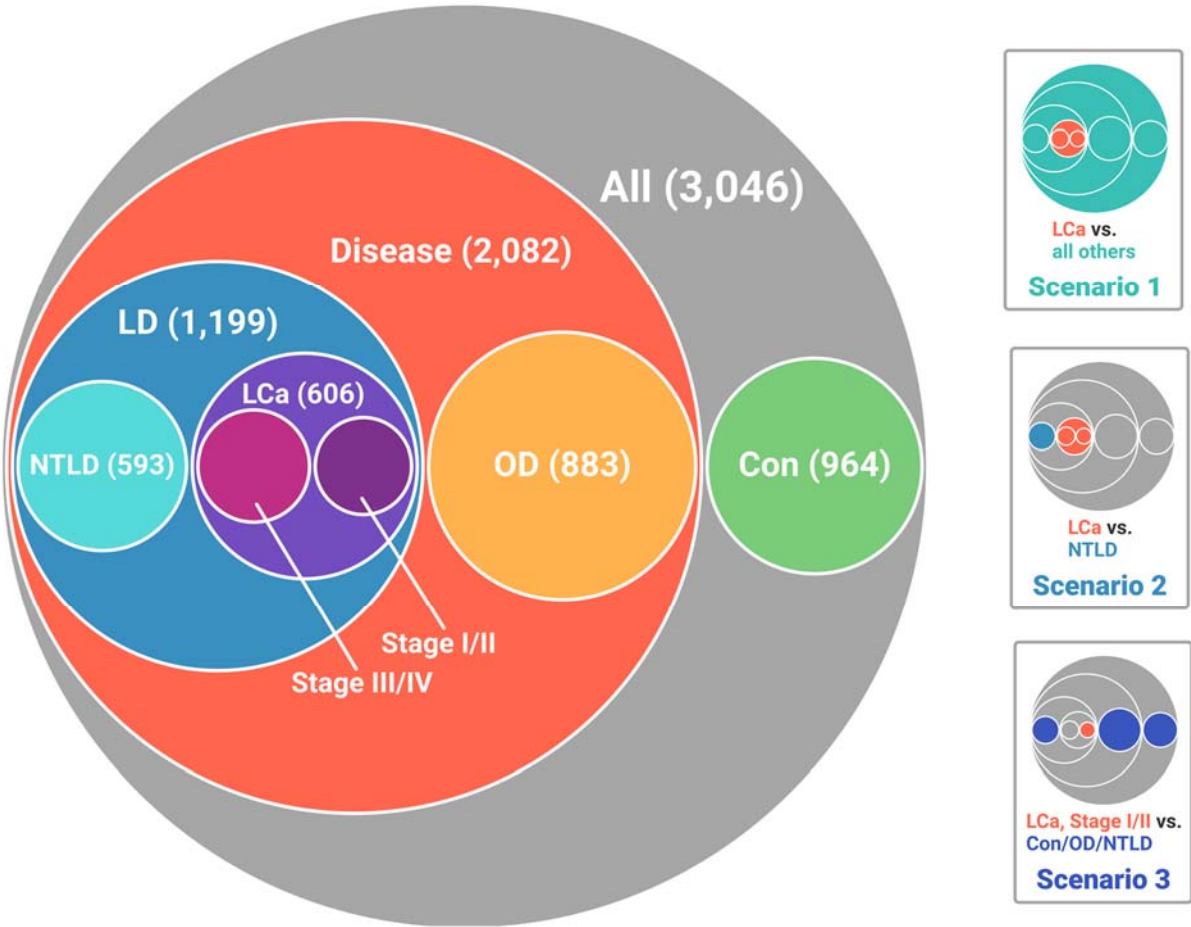

**eFigure 2. ROC-Analysis of Single miRNAs and miRNA Signatures for the Three Scenarios.** The first scenario (green line) differentiates lung cancer cases (LcA) versus a combined group of lung cancer, other lung diseases, other diseases not affecting the lungs and unaffected controls. The second comparison (orange line) was performed between lung cancer and non-cancer lung diseases. The third scenario (blue line) was performed between stage I or II lung tumors and a combined group of other lung diseases, other non-lung diseases and unaffected controls. The performance of the single markers is presented by dashed lines and the performance of the classifiers is shown by solid lines. In all cases, the performance of the classifier substantially outreached the single marker performance.

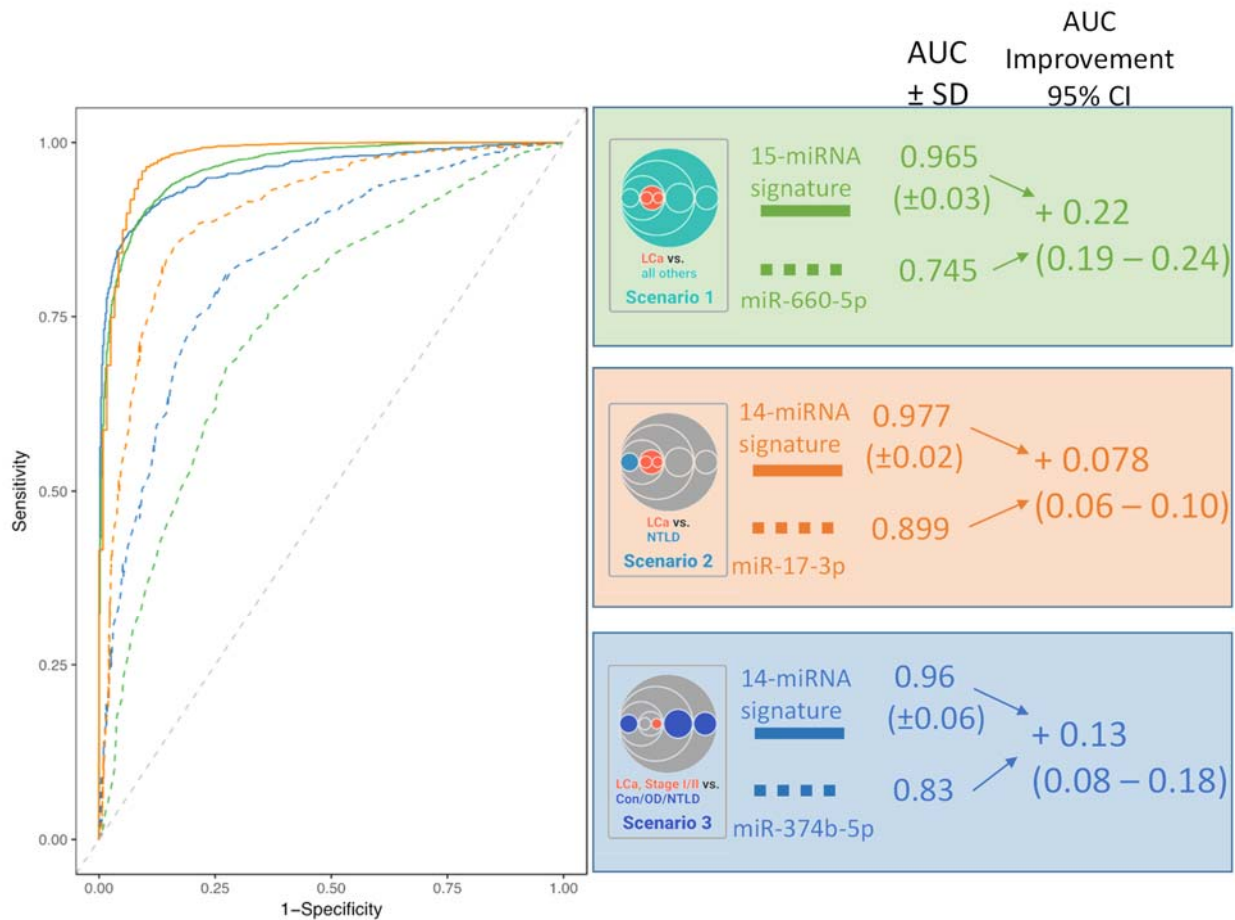



**eFigure 3. Heatmap for the Classification Performance for Different Age/Smoking Thresholds.** The orange dashed field denotes the National Lung Screening Trial (NLST) inclusion criteria (over 55 years and over 30 pack years).

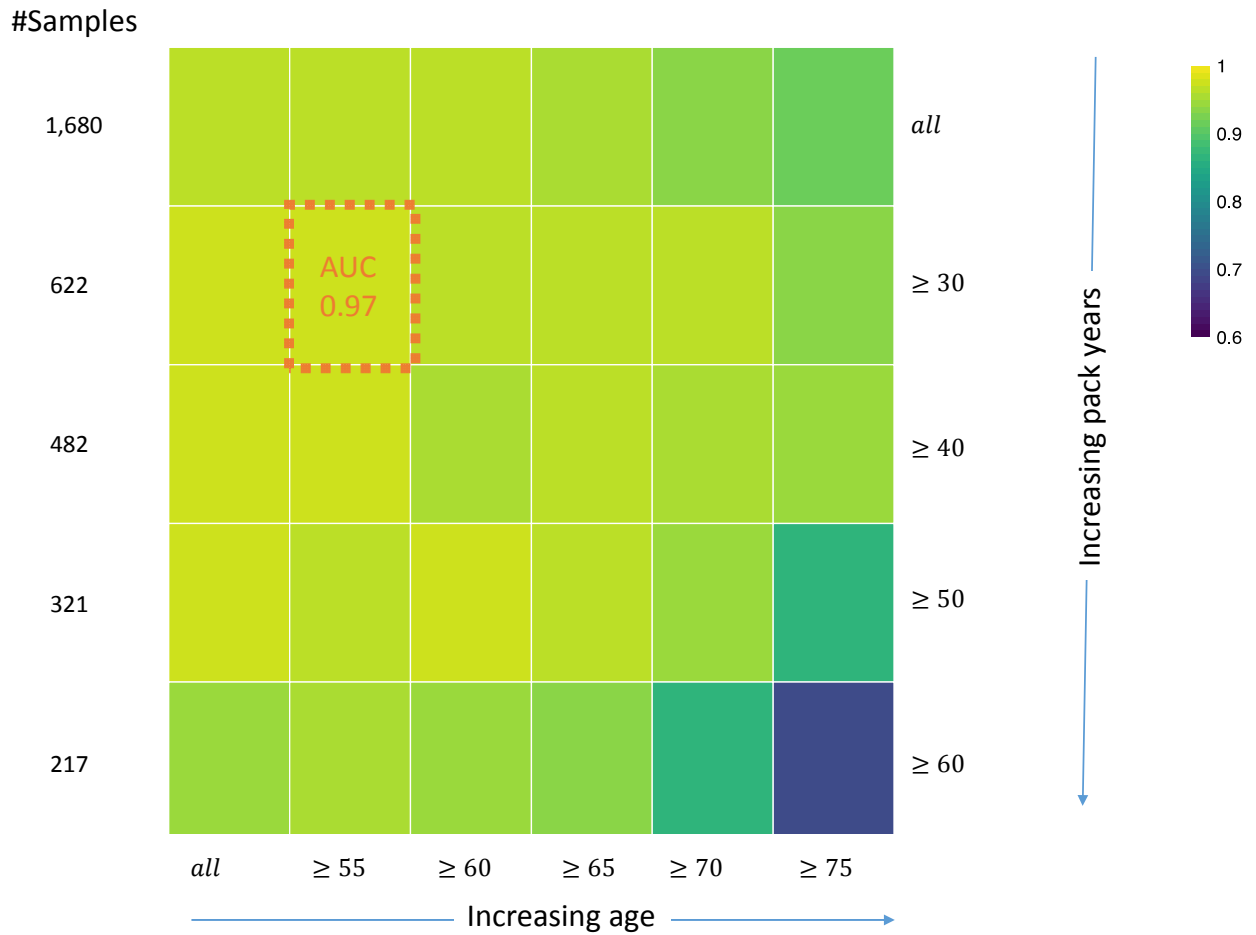

**eFigure 4. Pearson Correlation for 41 Repeated Experiments to Assess the Reproducibility.** The left panel presents all pair-wise Pearson correlation coefficients (the color coding in shown at the bottom right). The upper right part presents all pair-wise Pearson correlation coefficients as box-plot. The average correlation is 0.995 (95% CI 0.9948 – 0.9952).

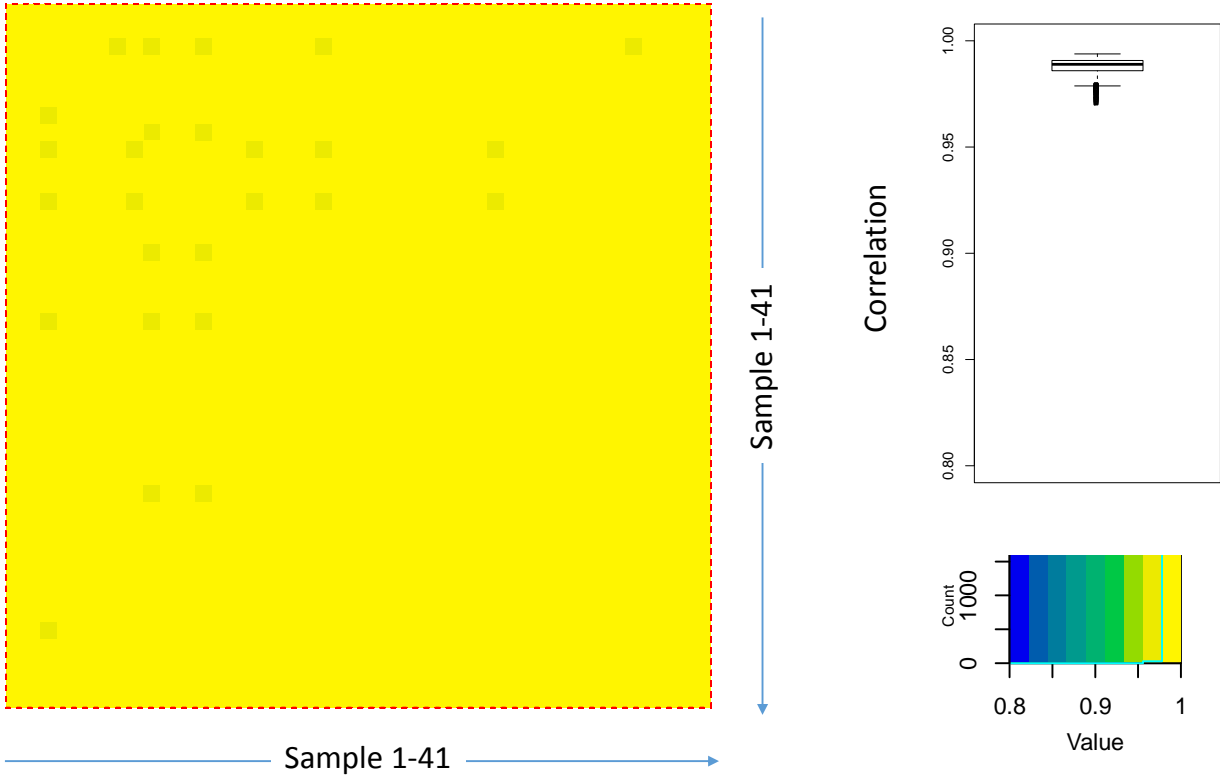

**eTable 1. Overview of Age, Gender and Smoking Status Along With Secured Diagnoses and Tumor Stages for the Collected Samples.** NTLD=Non-tumor lung disease, LCa=Lung cancer, HC=Healthy control, OD=Other disease, COPD=Chronic Obstructive Pulmonary Disease

| Sample number | Age  | Gender | Smoking history | Pack years | Disease                    | Group | Stage (only tumor patients) |
|---------------|------|--------|-----------------|------------|----------------------------|-------|-----------------------------|
| 1             | 75   | male   | Past            | 186        | COPD                       | NTLD  |                             |
| 2             | 71   | male   | Past            | 184        | COPD                       | NTLD  |                             |
| 3             | 58   | male   | Past            | 168        | COPD                       | NTLD  |                             |
| 4             | 56   | male   | Past            | 167.2      | COPD                       | NTLD  |                             |
| 5             | 66   | male   | Past            | 165        | COPD                       | NTLD  |                             |
| 6             | 68   | male   | Past            | 161.25     | COPD                       | NTLD  |                             |
| 7             | 62   | male   | Past            | 156        | COPD                       | NTLD  |                             |
| 8             | 65   | male   | Past            | 156        | COPD                       | NTLD  |                             |
| 9             | 51   | male   | Past            | 150        | COPD                       | NTLD  |                             |
| 10            | 70   | male   | Past            | 150        | COPD                       | NTLD  |                             |
| 11            | 75.5 | male   | Present         | 150        | Non-Small Cell Lung Cancer | LCa   | 1                           |
| 12            | 74.8 | male   | Present         | 150        | Non-Small Cell Lung Cancer | LCa   | 2                           |
| 13            | 71   | female | Past            | 144        | COPD                       | NTLD  |                             |
| 14            | 64   | male   | Past            | 143.5      | COPD                       | NTLD  |                             |
| 15            | 64   | male   | Past            | 141        | COPD                       | NTLD  |                             |
| 16            | 63   | male   | Past            | 141        | COPD                       | NTLD  |                             |
| 17            | 63   | male   | Past            | 140        | COPD                       | NTLD  |                             |
| 18            | 66   | male   | Past            | 140        | COPD                       | NTLD  |                             |
| 19            | 63   | male   | Present         | 140        | other Lung Carcinoma       | LCa   | 2                           |
| 20            | 72   | male   | Past            | 138        | COPD                       | NTLD  |                             |
| 21            | 55   | male   | Past            | 136.5      | COPD                       | NTLD  |                             |
| 22            | 68   | male   | Past            | 135        | COPD                       | NTLD  |                             |
| 23            | 74   | male   | Past            | 132.5      | COPD                       | NTLD  |                             |
| 24            | 64   | male   | Past            | 132        | COPD                       | NTLD  |                             |
| 25            | 69   | male   | Past            | 132        | COPD                       | NTLD  |                             |
| 26            | 73   | female | Past            | 129        | COPD                       | NTLD  |                             |
| 27            | 74   | male   | Past            | 127.5      | COPD                       | NTLD  |                             |
| 28            | 57   | male   | Past            | 126        | COPD                       | NTLD  |                             |
| 29            | 61   | male   | Past            | 126        | COPD                       | NTLD  |                             |
| 30            | 67   | male   | Past            | 126        | COPD                       | NTLD  |                             |
| 31            | 63   | male   | Past            | 123        | COPD                       | NTLD  |                             |
| 32            | 66.4 | male   | Past            | 120        | Non-Small Cell Lung Cancer | LCa   | 3                           |

| Sample number | Age  | Gender | Smoking history | Pack years | Disease                    | Group | Stage (only tumor patients) |
|---------------|------|--------|-----------------|------------|----------------------------|-------|-----------------------------|
| 33            | 68   | female | Past            | 120        | COPD                       | NTLD  |                             |
| 34            | 74   | male   | Present         | 118        | COPD                       | NTLD  |                             |
| 35            | 74   | male   | Past            | 117.3      | COPD                       | NTLD  |                             |
| 36            | 66   | male   | Past            | 117        | COPD                       | NTLD  |                             |
| 37            | 76   | male   | Past            | 116        | COPD                       | NTLD  |                             |
| 38            | 70   | male   | Past            | 114        | COPD                       | NTLD  |                             |
| 39            | 72   | male   | Past            | 112.5      | COPD                       | NTLD  |                             |
| 40            | 78   | male   | Past            | 112        | COPD                       | NTLD  |                             |
| 41            | 64   | male   | Past            | 111        | COPD                       | NTLD  |                             |
| 42            | 65   | male   | Past            | 111        | COPD                       | NTLD  |                             |
| 43            | 74   | male   | Past            | 111        | COPD                       | NTLD  |                             |
| 44            | 70   | male   | Past            | 110        | COPD                       | NTLD  |                             |
| 45            | 53   | male   | Past            | 108        | COPD                       | NTLD  |                             |
| 46            | 68   | male   | Present         | 108        | COPD                       | NTLD  |                             |
| 47            | 59   | male   | Past            | 107.5      | COPD                       | NTLD  |                             |
| 48            | 72   | male   | Past            | 105        | COPD                       | NTLD  |                             |
| 49            | 67   | male   | Past            | 104        | COPD                       | NTLD  |                             |
| 50            | 81   | male   | Past            | 103.25     | COPD                       | NTLD  |                             |
| 51            | 71   | male   | Past            | 102        | COPD                       | NTLD  |                             |
| 52            | 69.4 | male   | Past            | 100        | Non-Small Cell Lung Cancer | LCa   | 3                           |
| 53            | 78   | male   | Past            | 100        | COPD                       | NTLD  |                             |
| 54            | 72   | female | Past            | 100        | COPD                       | NTLD  |                             |
| 55            | 66   | male   | Past            | 100        | COPD                       | NTLD  |                             |
| 56            | 66   | male   | Present         | 100        | Non-Small Cell Lung Cancer | LCa   | 3                           |
| 57            | 53.4 | female | Present         | 100        | Small Cell Lung Cancer     | LCa   | 4                           |
| 58            | 77.7 | male   | Present         | 100        | Non-Small Cell Lung Cancer | LCa   | 1                           |
| 59            | 73.5 | male   | Present         | 100        | Non-Small Cell Lung Cancer | LCa   | 1                           |
| 60            | 66.5 | male   | Present         | 100        | Non-Small Cell Lung Cancer | LCa   | 2                           |
| 61            | 67   | male   | Past            | 99         | COPD                       | NTLD  |                             |
| 62            | 67   | male   | Past            | 99         | COPD                       | NTLD  |                             |
| 63            | 64   | male   | Past            | 99         | COPD                       | NTLD  |                             |
| 64            | 68   | male   | Past            | 98         | COPD                       | NTLD  |                             |
| 65            | 70   | female | Past            | 98         | COPD                       | NTLD  |                             |
| 66            | 71   | male   | Present         | 98         | COPD                       | NTLD  |                             |
| 67            | 75   | male   | Past            | 97.5       | COPD                       | NTLD  |                             |

| Sample number | Age  | Gender | Smoking history | Pack years | Disease                    | Group | Stage (only tumor patients) |
|---------------|------|--------|-----------------|------------|----------------------------|-------|-----------------------------|
| 68            | 72   | male   | Past            | 96         | COPD                       | NULD  |                             |
| 69            | 73   | male   | Past            | 96         | COPD                       | NULD  |                             |
| 70            | 75   | female | Past            | 96         | COPD                       | NULD  |                             |
| 71            | 65   | male   | Past            | 95         | COPD                       | NULD  |                             |
| 72            | 70   | male   | Past            | 94         | COPD                       | NULD  |                             |
| 73            | 77   | male   | Past            | 93         | COPD                       | NULD  |                             |
| 74            | 69   | male   | Past            | 92.75      | COPD                       | NULD  |                             |
| 75            | 67   | male   | Present         | 92         | COPD                       | NULD  |                             |
| 76            | 69   | male   | Past            | 90         | COPD                       | NULD  |                             |
| 77            | 64   | male   | Past            | 90         | COPD                       | NULD  |                             |
| 78            | 76   | male   | Past            | 90         | COPD                       | NULD  |                             |
| 79            | 71   | male   | Past            | 90         | COPD                       | NULD  |                             |
| 80            | 74   | female | Past            | 90         | COPD                       | NULD  |                             |
| 81            | 79.8 | male   | Present         | 90         | Non-Small Cell Lung Cancer | LCa   | 3                           |
| 82            | 68.2 | male   | Present         | 90         | Non-Small Cell Lung Cancer | LCa   | 2                           |
| 83            | 64.6 | male   | Present         | 90         | Non-Small Cell Lung Cancer | LCa   | 1                           |
| 84            | 72   | female | Past            | 89.25      | COPD                       | NULD  |                             |
| 85            | 70   | female | Past            | 88         | COPD                       | NULD  |                             |
| 86            | 71   | male   | Past            | 88         | COPD                       | NULD  |                             |
| 87            | 60   | male   | Past            | 88         | COPD                       | NULD  |                             |
| 88            | 77   | female | Past            | 88         | COPD                       | NULD  |                             |
| 89            | 67   | female | Past            | 85.75      | COPD                       | NULD  |                             |
| 90            | 73   | male   | Past            | 85.5       | COPD                       | NULD  |                             |
| 91            | 83   | male   | Past            | 84         | COPD                       | NULD  |                             |
| 92            | 57   | male   | Past            | 84         | COPD                       | NULD  |                             |
| 93            | 75   | male   | Past            | 84         | COPD                       | NULD  |                             |
| 94            | 72   | male   | Past            | 84         | COPD                       | NULD  |                             |
| 95            | 64   | male   | Past            | 84         | COPD                       | NULD  |                             |
| 96            | 77   | female | Past            | 82         | COPD                       | NULD  |                             |
| 97            | 69   | female | Past            | 82         | COPD                       | NULD  |                             |
| 98            | 61   | female | Past            | 82         | COPD                       | NULD  |                             |
| 99            | 69   | male   | Past            | 82         | COPD                       | NULD  |                             |
| 100           | 61   | male   | Past            | 82         | COPD                       | NULD  |                             |
| 101           | 70.5 | male   | Past            | 80         | other Lung Carcinoma       | LCa   |                             |
| 102           | 67   | male   | Past            | 80         | COPD                       | NULD  |                             |
| 103           | 73   | male   | Past            | 80         | COPD                       | NULD  |                             |

| Sample number | Age  | Gender | Smoking history | Pack years | Disease                    | Group | Stage (only tumor patients) |
|---------------|------|--------|-----------------|------------|----------------------------|-------|-----------------------------|
| 104           | 72   | male   | Past            | 80         | COPD                       | NULD  |                             |
| 105           | 69   | male   | Past            | 80         | COPD                       | NULD  |                             |
| 106           | 54.9 | male   | Present         | 80         | Small Cell Lung Cancer     | LCa   | 4                           |
| 107           | 74.8 | female | Present         | 80         | Non-Small Cell Lung Cancer | LCa   | 2                           |
| 108           | 68   | male   | Present         | 79.5       | COPD                       | NULD  |                             |
| 109           | 70   | female | Present         | 79.5       | COPD                       | NULD  |                             |
| 110           | 63   | female | Past            | 78.75      | COPD                       | NULD  |                             |
| 111           | 73   | female | Past            | 78.3       | COPD                       | NULD  |                             |
| 112           | 71   | male   | Past            | 78         | COPD                       | NULD  |                             |
| 113           | 71   | male   | Present         | 78         | COPD                       | NULD  |                             |
| 114           | 78   | male   | Past            | 77         | COPD                       | NULD  |                             |
| 115           | 68   | male   | Past            | 76.5       | COPD                       | NULD  |                             |
| 116           | 62   | male   | Past            | 76         | COPD                       | NULD  |                             |
| 117           | 72   | male   | Past            | 75         | COPD                       | NULD  |                             |
| 118           | 60   | female | Past            | 75         | COPD                       | NULD  |                             |
| 119           | 75   | male   | Past            | 75         | COPD                       | NULD  |                             |
| 120           | 72.8 | male   | Present         | 75         | Non-Small Cell Lung Cancer | LCa   | 2                           |
| 121           | 50.2 | female | Present         | 75         | Non-Small Cell Lung Cancer | LCa   | 2                           |
| 122           | 66.9 |        | Present         | 75         | Small Cell Lung Cancer     | LCa   | 4                           |
| 123           | 66.9 |        | Present         | 75         | Small Cell Lung Cancer     | LCa   | 4                           |
| 124           | 66.9 |        | Present         | 75         | Small Cell Lung Cancer     | LCa   | 4                           |
| 125           | 79   | male   | Past            | 74         | COPD                       | NULD  |                             |
| 126           | 71   | male   | Past            | 74         | COPD                       | NULD  |                             |
| 127           | 66   | female | Past            | 73.5       | COPD                       | NULD  |                             |
| 128           | 64   | female | Past            | 73.5       | COPD                       | NULD  |                             |
| 129           | 68   | male   | Past            | 73.5       | COPD                       | NULD  |                             |
| 130           | 64   | male   | Present         | 73.5       | COPD                       | NULD  |                             |
| 131           | 71   | female | Past            | 72         | COPD                       | NULD  |                             |
| 132           | 73   | male   | Past            | 72         | COPD                       | NULD  |                             |
| 133           | 53   | male   | Past            | 72         | COPD                       | NULD  |                             |
| 134           | 63   | male   | Past            | 72         | COPD                       | NULD  |                             |
| 135           | 73   | male   | Past            | 72         | COPD                       | NULD  |                             |
| 136           | 78   | male   | Past            | 72         | COPD                       | NULD  |                             |
| 137           | 73   | male   | Past            | 71.4       | COPD                       | NULD  |                             |
| 138           | 66   | male   | Past            | 70.5       | COPD                       | NULD  |                             |
| 139           | 72   | male   | Past            | 70.5       | COPD                       | NULD  |                             |

| Sample number | Age  | Gender | Smoking history | Pack years | Disease                    | Group | Stage (only tumor patients) |
|---------------|------|--------|-----------------|------------|----------------------------|-------|-----------------------------|
| 140           | 66   | male   | Past            | 70.5       | COPD                       | NTLD  |                             |
| 141           | 62   | male   | Past            | 70.5       | COPD                       | NTLD  |                             |
| 142           | 65.3 | male   | Past            | 70         | Non-Small Cell Lung Cancer | LCa   | 3                           |
| 143           | 59   | male   | Past            | 70         | COPD                       | NTLD  |                             |
| 144           | 48   | male   | Past            | 70         | COPD                       | NTLD  |                             |
| 145           | 70   | male   | Past            | 70         | COPD                       | NTLD  |                             |
| 146           | 68   | female | Past            | 70         | COPD                       | NTLD  |                             |
| 147           | 56.8 | male   | Present         | 70         | Non-Small Cell Lung Cancer | LCa   | 4                           |
| 148           | 74.8 | male   | Present         | 70         | Non-Small Cell Lung Cancer | LCa   | 1                           |
| 149           | 66   | female | Present         | 70         | Non-Small Cell Lung Cancer | LCa   | 3                           |
| 150           | 58.7 | male   | Present         | 70         | Non-Small Cell Lung Cancer | LCa   | 3                           |
| 151           | 69.7 | male   | Present         | 70         | COPD                       | NTLD  |                             |
| 152           | 75.8 | male   | Present         | 70         | Non-Small Cell Lung Cancer | LCa   | 2                           |
| 153           | 69   | female | Past            | 69         | COPD                       | NTLD  |                             |
| 154           | 66   | male   | Past            | 69         | COPD                       | NTLD  |                             |
| 155           | 71   | male   | Past            | 68.25      | COPD                       | NTLD  |                             |
| 156           | 73   | female | Past            | 68         | COPD                       | NTLD  |                             |
| 157           | 51   | male   | Past            | 68         | COPD                       | NTLD  |                             |
| 158           | 61   | male   | Past            | 67.5       | COPD                       | NTLD  |                             |
| 159           | 69   | male   | Past            | 67.5       | COPD                       | NTLD  |                             |
| 160           | 56   | female | Past            | 66         | COPD                       | NTLD  |                             |
| 161           | 71   | male   | Past            | 66         | COPD                       | NTLD  |                             |
| 162           | 65   | male   | Past            | 66         | COPD                       | NTLD  |                             |
| 163           | 68   | male   | Past            | 65         | COPD                       | NTLD  |                             |
| 164           | 60   | female | Past            | 64.5       | COPD                       | NTLD  |                             |
| 165           | 64   | male   | Past            | 64.5       | COPD                       | NTLD  |                             |
| 166           | 68   | female | Past            | 64.5       | COPD                       | NTLD  |                             |
| 167           | 67   | female | Past            | 63.75      | COPD                       | NTLD  |                             |
| 168           | 69   | male   | Past            | 63.75      | COPD                       | NTLD  |                             |
| 169           | 66   | male   | Present         | 63.75      | COPD                       | NTLD  |                             |
| 170           | 64   | male   | Present         | 63.75      | COPD                       | NTLD  |                             |
| 171           | 72   | female | Past            | 63         | COPD                       | NTLD  |                             |
| 172           | 69   | female | Past            | 63         | COPD                       | NTLD  |                             |
| 173           | 58   | male   | Present         | 63         | COPD                       | NTLD  |                             |

| Sample number | Age  | Gender | Smoking history | Pack years | Disease                    | Group | Stage (only tumor patients) |
|---------------|------|--------|-----------------|------------|----------------------------|-------|-----------------------------|
| 174           | 71   | male   | Past            | 62.5       | COPD                       | NTLD  |                             |
| 175           | 66   | male   | Past            | 62.4       | COPD                       | NTLD  |                             |
| 176           | 55   | male   | Past            | 62         | COPD                       | NTLD  |                             |
| 177           | 74   | male   | Past            | 62         | COPD                       | NTLD  |                             |
| 178           | 77   | male   | Past            | 62         | COPD                       | NTLD  |                             |
| 179           | 61   | female | Past            | 61.5       | COPD                       | NTLD  |                             |
| 180           | 57   | female | Past            | 61.5       | COPD                       | NTLD  |                             |
| 181           | 58   | male   | Present         | 61.5       | COPD                       | NTLD  |                             |
| 182           | 69   | male   | Past            | 61.25      | COPD                       | NTLD  |                             |
| 183           | 64   | male   | Present         | 61.25      | COPD                       | NTLD  |                             |
| 184           | 60   | female | Present         | 61.25      | COPD                       | NTLD  |                             |
| 185           | 70   | female | Present         | 61.25      | COPD                       | NTLD  |                             |
| 186           | 63   | female | Past            | 61.2       | COPD                       | NTLD  |                             |
| 187           | 59.5 | male   | Past            | 60         | Non-Small Cell Lung Cancer | LCa   | 1                           |
| 188           | 81.7 | male   | Past            | 60         | Non-Small Cell Lung Cancer | LCa   | 1                           |
| 189           | 71.1 | male   | Past            | 60         | Non-Small Cell Lung Cancer | LCa   | 1                           |
| 190           | 62.7 | female | Past            | 60         | Small Cell Lung Cancer     | LCa   | 3                           |
| 191           | 67.6 | male   | Past            | 60         | other Lung Carcinoma       | LCa   |                             |
| 192           | 86.1 | male   | Past            | 60         | Non-Small Cell Lung Cancer | LCa   | 1                           |
| 193           | 78   | male   | Past            | 60         | other Lung Carcinoma       | LCa   |                             |
| 194           | 69   | male   | Past            | 60         | HC                         | HC    |                             |
| 195           | 84   | male   | Past            | 60         | HC                         | HC    |                             |
| 196           | 72   | male   | Past            | 60         | HC                         | HC    |                             |
| 197           | 62   | female | Past            | 60         | COPD                       | NTLD  |                             |
| 198           | 62   | male   | Past            | 60         | COPD                       | NTLD  |                             |
| 199           | 65   | female | Past            | 60         | COPD                       | NTLD  |                             |
| 200           | 71   | male   | Past            | 60         | COPD                       | NTLD  |                             |
| 201           | 57.6 | female | Present         | 60         | Non-Small Cell Lung Cancer | LCa   | 4                           |
| 202           | 56.3 | male   | Present         | 60         | Non-Small Cell Lung Cancer | LCa   | 2                           |
| 203           | 60.2 | female | Present         | 60         | Non-Small Cell Lung Cancer | LCa   | 1                           |
| 204           | 57.5 | male   | Present         | 60         | Non-Small Cell Lung Cancer | LCa   | 2                           |
| 205           | 57.8 | female | Present         | 60         | Small Cell Lung Cancer     | LCa   | 4                           |
| 206           | 57.8 | female | Present         | 60         | Small Cell Lung Cancer     | LCa   | 4                           |



| Sample number | Age  | Gender | Smoking history | Pack years | Disease                    | Group | Stage (only tumor patients) |
|---------------|------|--------|-----------------|------------|----------------------------|-------|-----------------------------|
| 207           | 62   | male   | Present         | 60         | Non-Small Cell Lung Cancer | LCa   | 2                           |
| 208           | 67.5 | female | Present         | 60         | Non-Small Cell Lung Cancer | LCa   | 2                           |
| 209           | 67.9 | male   | Present         | 60         | Non-Small Cell Lung Cancer | LCa   | 3                           |
| 210           | 57.3 | male   | Present         | 60         | Non-Small Cell Lung Cancer | LCa   | 2                           |
| 211           | 63.1 | male   | Present         | 60         | Non-Small Cell Lung Cancer | LCa   | 1                           |
| 212           | 74.9 | male   | Present         | 60         | Non-Small Cell Lung Cancer | LCa   | 2                           |
| 213           | 68.5 | male   | Present         | 60         | other Lung Carcinoma       | LCa   | 3                           |
| 214           | 55.5 | male   | Present         | 60         | Non-Small Cell Lung Cancer | LCa   | 1                           |
| 215           | 67.8 | male   | Present         | 60         | Non-Small Cell Lung Cancer | LCa   | 2                           |
| 216           | 63   | male   | Present         | 60         | COPD                       | NULD  |                             |
| 217           | 70   | male   | Present         | 60         | COPD                       | NULD  |                             |
| 218           | 76   | male   | Past            | 59         | COPD                       | NULD  |                             |
| 219           | 75   | female | Past            | 58.5       | COPD                       | NULD  |                             |
| 220           | 71   | male   | Past            | 58.5       | COPD                       | NULD  |                             |
| 221           | 60   | female | Past            | 58         | COPD                       | NULD  |                             |
| 222           | 66   | male   | Past            | 58         | COPD                       | NULD  |                             |
| 223           | 74   | male   | Past            | 58         | COPD                       | NULD  |                             |
| 224           | 75   | female | Present         | 58         | COPD                       | NULD  |                             |
| 225           | 65   | male   | Past            | 57.5       | COPD                       | NULD  |                             |
| 226           | 67   | male   | Past            | 57.5       | COPD                       | NULD  |                             |
| 227           | 70   | male   | Past            | 57         | COPD                       | NULD  |                             |
| 228           | 74   | male   | Past            | 56.25      | COPD                       | NULD  |                             |
| 229           | 62   | female | Present         | 56.25      | HC                         | HC    |                             |
| 230           | 73   | female | Present         | 56         | COPD                       | NULD  |                             |
| 231           | 73   | male   | Present         | 56         | COPD                       | NULD  |                             |
| 232           | 63.8 | male   | Past            | 55         | Non-Small Cell Lung Cancer | LCa   | 2                           |
| 233           | 70   | male   | Past            | 55         | COPD                       | NULD  |                             |
| 234           | 71   | male   | Past            | 55         | COPD                       | NULD  |                             |
| 235           | 72   | male   | Past            | 55         | COPD                       | NULD  |                             |
| 236           | 61.3 | male   | Present         | 55         | Non-Small Cell Lung Cancer | LCa   | 1                           |
| 237           | 51.1 |        | Present         | 55         | Small Cell Lung Cancer     | LCa   | 3                           |
| 238           | 51.1 |        | Present         | 55         | Small Cell Lung Cancer     | LCa   | 3                           |

| Sample number | Age  | Gender | Smoking history | Pack years | Disease                    | Group | Stage (only tumor patients) |
|---------------|------|--------|-----------------|------------|----------------------------|-------|-----------------------------|
| 239           | 51.1 |        | Present         | 55         | Small Cell Lung Cancer     | LCa   | 3                           |
| 240           | 74.7 | male   | Present         | 55         | Non-Small Cell Lung Cancer | LCa   | 1                           |
| 241           | 74.4 | male   | Present         | 55         | Non-Small Cell Lung Cancer | LCa   | 2                           |
| 242           | 61.9 | female | Present         | 55         | Non-Small Cell Lung Cancer | LCa   | 1                           |
| 243           | 77.8 | male   | Present         | 55         | Non-Small Cell Lung Cancer | LCa   | 3                           |
| 244           | 69   | male   | Present         | 55         | COPD                       | NULD  |                             |
| 245           | 69   | male   | Present         | 55         | COPD                       | NULD  |                             |
| 246           | 54   | female | Past            | 54         | COPD                       | NULD  |                             |
| 247           | 55   | male   | Past            | 54         | COPD                       | NULD  |                             |
| 248           | 71   | male   | Past            | 54         | COPD                       | NULD  |                             |
| 249           | 70   | female | Past            | 53.75      | COPD                       | NULD  |                             |
| 250           | 68   | female | Past            | 52.5       | COPD                       | NULD  |                             |
| 251           | 58   | male   | Past            | 52.5       | COPD                       | NULD  |                             |
| 252           | 74   | male   | Past            | 52         | COPD                       | NULD  |                             |
| 253           | 41   | male   | Past            | 52         | COPD                       | NULD  |                             |
| 254           | 76   | male   | Past            | 52         | COPD                       | NULD  |                             |
| 255           | 66   | male   | Present         | 52         | HC                         | HC    |                             |
| 256           | 69   | male   | Present         | 52         | COPD                       | NULD  |                             |
| 257           | 67   | male   | Present         | 52         | COPD                       | NULD  |                             |
| 258           | 54   | male   | Present         | 51.25      | COPD                       | NULD  |                             |
| 259           | 76   | male   | Past            | 51         | COPD                       | NULD  |                             |
| 260           | 81   | male   | Past            | 51         | COPD                       | NULD  |                             |
| 261           | 65   | female | Past            | 51         | COPD                       | NULD  |                             |
| 262           | 64   | male   | Past            | 51         | COPD                       | NULD  |                             |
| 263           | 68   | male   | Past            | 51         | COPD                       | NULD  |                             |
| 264           | 76   | male   | Past            | 51         | COPD                       | NULD  |                             |
| 265           | 73   | male   | Past            | 51         | COPD                       | NULD  |                             |
| 266           | 65   | male   | Present         | 51         | COPD                       | NULD  |                             |
| 267           | 62   | female | Present         | 51         | COPD                       | NULD  |                             |
| 268           | 71   | male   | Present         | 51         | COPD                       | NULD  |                             |
| 269           | 78.2 | male   | Past            | 50         | Non-Small Cell Lung Cancer | LCa   | 4                           |
| 270           | 63.1 | female | Past            | 50         | Non-Small Cell Lung Cancer | LCa   | 3                           |
| 271           | 74.1 | male   | Past            | 50         | Non-Small Cell Lung Cancer | LCa   | 2                           |

| Sample number | Age  | Gender | Smoking history | Pack years | Disease                    | Group | Stage (only tumor patients) |
|---------------|------|--------|-----------------|------------|----------------------------|-------|-----------------------------|
| 272           | 72   | male   | Past            | 50         | Non-Small Cell Lung Cancer | LCa   | 2                           |
| 273           | 78.3 | male   | Past            | 50         | Non-Small Cell Lung Cancer | LCa   | 3                           |
| 274           | 78.6 | male   | Past            | 50         | Non-Small Cell Lung Cancer | LCa   | 1                           |
| 275           | 83   | female | Past            | 50         | Small Cell Lung Cancer     | LCa   | 2                           |
| 276           | 80.1 | male   | Past            | 50         | Non-Small Cell Lung Cancer | LCa   | 1                           |
| 277           | 83   | male   | Past            | 50         | COPD                       | NULD  |                             |
| 278           | 67   | male   | Past            | 50         | COPD                       | NULD  |                             |
| 279           | 57   | male   | Past            | 50         | COPD                       | NULD  |                             |
| 280           | 82   | male   | Past            | 50         | COPD                       | NULD  |                             |
| 281           | 72   | female | Past            | 50         | COPD                       | NULD  |                             |
| 282           | 73   | female | Past            | 50         | COPD                       | NULD  |                             |
| 283           | 64.1 | male   | Present         | 50         | Non-Small Cell Lung Cancer | LCa   |                             |
| 284           | 65.9 | male   | Present         | 50         | Non-Small Cell Lung Cancer | LCa   | 2                           |
| 285           | 83.2 | male   | Present         | 50         | Non-Small Cell Lung Cancer | LCa   | 1                           |
| 286           | 75.3 | male   | Present         | 50         | Non-Small Cell Lung Cancer | LCa   | 1                           |
| 287           | 67.9 | male   | Present         | 50         | Non-Small Cell Lung Cancer | LCa   | 2                           |
| 288           | 67.1 | female | Present         | 50         | Small Cell Lung Cancer     | LCa   | 4                           |
| 289           | 47.6 | male   | Present         | 50         | Non-Small Cell Lung Cancer | LCa   | 3                           |
| 290           | 58.4 | male   | Present         | 50         | Non-Small Cell Lung Cancer | LCa   | 3                           |
| 291           | 66.7 | male   | Present         | 50         | Non-Small Cell Lung Cancer | LCa   | 3                           |
| 292           | 62.6 | female | Present         | 50         | Non-Small Cell Lung Cancer | LCa   | 3                           |
| 293           | 74.1 | female | Present         | 50         | Non-Small Cell Lung Cancer | LCa   | 3                           |
| 294           | 69.2 | female | Present         | 50         | Small Cell Lung Cancer     | LCa   | 4                           |
| 295           | 76.5 | male   | Present         | 50         | Small Cell Lung Cancer     | LCa   |                             |
| 296           | 66   | male   | Present         | 50         | Small Cell Lung Cancer     | LCa   | 3                           |
| 297           | 67.9 | female | Present         | 50         | Small Cell Lung Cancer     | LCa   | 4                           |
| 298           | 71.6 | male   | Present         | 50         | Non-Small Cell Lung Cancer | LCa   | 1                           |
| 299           | 68.8 | male   | Present         | 50         | COPD                       | NULD  |                             |
| 300           | 56.3 | male   | Present         | 50         | Non-Small Cell Lung Cancer | LCa   | 1                           |

| Sample number | Age  | Gender | Smoking history | Pack years | Disease                    | Group | Stage (only tumor patients) |
|---------------|------|--------|-----------------|------------|----------------------------|-------|-----------------------------|
| 301           | 54.3 | female | Present         | 50         | Non-Small Cell Lung Cancer | LCa   | 2                           |
| 302           | 60.9 | male   | Present         | 50         | Non-Small Cell Lung Cancer | LCa   | 2                           |
| 303           | 70.1 | female | Present         | 50         | Non-Small Cell Lung Cancer | LCa   | 1                           |
| 304           | 66.5 | male   | Present         | 50         | Non-Small Cell Lung Cancer | LCa   | 1                           |
| 305           | 55   | female | Present         | 50         | Small Cell Lung Cancer     | LCa   | 1                           |
| 306           | 72   | male   | Present         | 50         | Small Cell Lung Cancer     | LCa   | 1                           |
| 307           | 60   | female | Present         | 50         | Non-Small Cell Lung Cancer | LCa   | 2                           |
| 308           | 67.9 | male   | Present         | 50         | Non-Small Cell Lung Cancer | LCa   | 2                           |
| 309           | 64.7 | female | Present         | 50         | Non-Small Cell Lung Cancer | LCa   | 1                           |
| 310           | 68   | male   | Present         | 50         | Non-Small Cell Lung Cancer | LCa   | 1                           |
| 311           | 74.7 | female | Present         | 50         | Non-Small Cell Lung Cancer | LCa   | 1                           |
| 312           | 57.2 | male   | Present         | 50         | Non-Small Cell Lung Cancer | LCa   | 2                           |
| 313           | 70.4 | male   | Present         | 50         | other Lung Carcinoma       | LCa   | 3                           |
| 314           | 47.2 | female | Present         | 50         | Non-Small Cell Lung Cancer | LCa   | 3                           |
| 315           | 58.8 | male   | Present         | 50         | Non-Small Cell Lung Cancer | LCa   | 2                           |
| 316           | 71.9 | male   | Present         | 50         | Non-Small Cell Lung Cancer | LCa   | 2                           |
| 317           | 69.9 | male   | Present         | 50         | other Lung Carcinoma       | LCa   |                             |
| 318           | 53.1 | male   | Present         | 50         | Non-Small Cell Lung Cancer | LCa   | 3                           |
| 319           | 66.8 | female | Present         | 50         | Non-Small Cell Lung Cancer | LCa   |                             |
| 320           | 67   | female | Present         | 50         | COPD                       | NULD  |                             |
| 321           | 48.6 | female | Yes             | 50         | Non-Small Cell Lung Cancer | LCa   | 2                           |
| 322           | 66   | male   | Past            | 49.5       | COPD                       | NULD  |                             |
| 323           | 73   | male   | Past            | 49.5       | COPD                       | NULD  |                             |
| 324           | 77   | male   | Past            | 49         | COPD                       | NULD  |                             |
| 325           | 70   | male   | Past            | 49         | COPD                       | NULD  |                             |
| 326           | 65   | male   | Past            | 49         | COPD                       | NULD  |                             |
| 327           | 73   | male   | Past            | 49         | COPD                       | NULD  |                             |
| 328           | 71   | male   | Past            | 49         | COPD                       | NULD  |                             |
| 329           | 62   | male   | Present         | 49         | COPD                       | NULD  |                             |

| Sample number | Age  | Gender | Smoking history | Pack years | Disease                    | Group | Stage (only tumor patients) |
|---------------|------|--------|-----------------|------------|----------------------------|-------|-----------------------------|
| 330           | 78   | female | Past            | 48.3       | COPD                       | NULD  |                             |
| 331           | 81   | male   | Past            | 48         | COPD                       | NULD  |                             |
| 332           | 59   | female | Past            | 48         | COPD                       | NULD  |                             |
| 333           | 73   | male   | Past            | 48         | COPD                       | NULD  |                             |
| 334           | 63   | female | Present         | 48         | COPD                       | NULD  |                             |
| 335           | 70   | male   | Past            | 47.5       | COPD                       | NULD  |                             |
| 336           | 76   | male   | Past            | 47.5       | COPD                       | NULD  |                             |
| 337           | 53   | female | Present         | 47.5       | COPD                       | NULD  |                             |
| 338           | 75   | male   | Past            | 47         | COPD                       | NULD  |                             |
| 339           | 67   | male   | Past            | 46         | COPD                       | NULD  |                             |
| 340           | 63   | female | Past            | 46         | COPD                       | NULD  |                             |
| 341           | 72   | male   | Past            | 46         | COPD                       | NULD  |                             |
| 342           | 71   | male   | Past            | 46         | COPD                       | NULD  |                             |
| 343           | 64   | male   | Past            | 46         | COPD                       | NULD  |                             |
| 344           | 65   | male   | Past            | 46         | COPD                       | NULD  |                             |
| 345           | 60   | male   | Present         | 46         | COPD                       | NULD  |                             |
| 346           | 64   | female | Present         | 46         | COPD                       | NULD  |                             |
| 347           | 77   | male   | Past            | 45         | Non-Small Cell Lung Cancer | LCa   | 2                           |
| 348           | 61.8 | male   | Past            | 45         | Small Cell Lung Cancer     | LCa   | 3                           |
| 349           | 61.9 | male   | Past            | 45         | Small Cell Lung Cancer     | LCa   | 3                           |
| 350           | 61.9 | male   | Past            | 45         | Small Cell Lung Cancer     | LCa   | 3                           |
| 351           | 71.5 | male   | Past            | 45         | NULD                       | NULD  |                             |
| 352           | 76.7 | male   | Past            | 45         | Non-Small Cell Lung Cancer | LCa   | 1                           |
| 353           | 75.4 | male   | Past            | 45         | Non-Small Cell Lung Cancer | LCa   | 2                           |
| 354           | 65   | male   | Past            | 45         | HC                         | HC    |                             |
| 355           | 67   | male   | Past            | 45         | COPD                       | NULD  |                             |
| 356           | 69   | female | Past            | 45         | COPD                       | NULD  |                             |
| 357           | 51   | female | Past            | 45         | COPD                       | NULD  |                             |
| 358           | 65   | male   | Past            | 45         | COPD                       | NULD  |                             |
| 359           | 64.5 | female | Present         | 45         | Non-Small Cell Lung Cancer | LCa   | 4                           |
| 360           | 61.7 | male   | Present         | 45         | Non-Small Cell Lung Cancer | LCa   | 2                           |
| 361           | 63.2 | male   | Present         | 45         | Small Cell Lung Cancer     | LCa   | 4                           |
| 362           | 63.3 | male   | Present         | 45         | Small Cell Lung Cancer     | LCa   | 4                           |
| 363           | 71   | female | Present         | 45         | Non-Small Cell Lung Cancer | LCa   | 2                           |

| Sample number | Age  | Gender | Smoking history | Pack years | Disease                    | Group | Stage (only tumor patients) |
|---------------|------|--------|-----------------|------------|----------------------------|-------|-----------------------------|
| 364           | 73.4 | male   | Present         | 45         | Non-Small Cell Lung Cancer | LCa   | 2                           |
| 365           | 66.4 |        | Present         | 45         | Small Cell Lung Cancer     | LCa   | 4                           |
| 366           | 66.4 |        | Present         | 45         | Small Cell Lung Cancer     | LCa   | 4                           |
| 367           | 66.4 |        | Present         | 45         | Small Cell Lung Cancer     | LCa   | 4                           |
| 368           | 78.5 | male   | Present         | 45         | Non-Small Cell Lung Cancer | LCa   | 3                           |
| 369           | 62.2 | female | Present         | 45         | Small Cell Lung Cancer     | LCa   | 4                           |
| 370           | 56.1 | male   | Present         | 45         | Non-Small Cell Lung Cancer | LCa   | 4                           |
| 371           | 58.8 | male   | Present         | 45         | Small Cell Lung Cancer     | LCa   | 3                           |
| 372           | 60.1 |        | Present         | 45         | Small Cell Lung Cancer     | LCa   | 4                           |
| 373           | 60.1 |        | Present         | 45         | Small Cell Lung Cancer     | LCa   | 4                           |
| 374           | 60.1 |        | Present         | 45         | Small Cell Lung Cancer     | LCa   | 4                           |
| 375           | 63.8 | male   | Present         | 45         | Non-Small Cell Lung Cancer | LCa   | 1                           |
| 376           | 75.7 | male   | Present         | 45         | Non-Small Cell Lung Cancer | LCa   | 2                           |
| 377           | 56.6 | female | Present         | 45         | Non-Small Cell Lung Cancer | LCa   | 1                           |
| 378           | 67.2 | male   | Present         | 45         | Non-Small Cell Lung Cancer | LCa   | 2                           |
| 379           | 72.4 | male   | Present         | 45         | Non-Small Cell Lung Cancer | LCa   | 3                           |
| 380           | 50.9 | female | Present         | 45         | Non-Small Cell Lung Cancer | LCa   | 3                           |
| 381           | 68.7 | female | Present         | 45         | other Lung Carcinoma       | LCa   |                             |
| 382           | 65   | female | Present         | 45         | HC                         | HC    |                             |
| 383           | 61   | male   | Present         | 45         | HC                         | HC    |                             |
| 384           | 60   | male   | Present         | 45         | COPD                       | NULD  |                             |
| 385           | 60   | female | Present         | 45         | COPD                       | NULD  |                             |
| 386           | 66   | male   | Past            | 44         | COPD                       | NULD  |                             |
| 387           | 61   | male   | Past            | 44         | COPD                       | NULD  |                             |
| 388           | 65   | male   | Past            | 44         | COPD                       | NULD  |                             |
| 389           | 65   | male   | Present         | 44         | COPD                       | NULD  |                             |
| 390           | 58   | male   | Present         | 44         | COPD                       | NULD  |                             |
| 391           | 62   | male   | Past            | 43.75      | HC                         | HC    |                             |
| 392           | 70   | male   | Past            | 43.75      | COPD                       | NULD  |                             |
| 393           | 62   | female | Past            | 43.75      | COPD                       | NULD  |                             |
| 394           | 78   | male   | Past            | 43.75      | otherTumor                 | OD    |                             |
| 395           | 66   | male   | Past            | 43.75      | COPD                       | NULD  |                             |
| 396           | 54   | female | Past            | 43.75      | COPD                       | NULD  |                             |

| Sample number | Age  | Gender | Smoking history | Pack years | Disease                    | Group | Stage (only tumor patients) |
|---------------|------|--------|-----------------|------------|----------------------------|-------|-----------------------------|
| 397           | 73   | male   | Past            | 43         | COPD                       | NULD  |                             |
| 398           | 67   | female | Past            | 43         | COPD                       | NULD  |                             |
| 399           | 82   | male   | Past            | 43         | COPD                       | NULD  |                             |
| 400           | 73   | male   | Past            | 43         | COPD                       | NULD  |                             |
| 401           | 83   | male   | Past            | 43         | COPD                       | NULD  |                             |
| 402           | 63   | female | Present         | 43         | COPD                       | NULD  |                             |
| 403           | 48   | female | Past            | 42.5       | COPD                       | NULD  |                             |
| 404           | 64   | female | Past            | 42         | COPD                       | NULD  |                             |
| 405           | 75   | female | Past            | 42         | COPD                       | NULD  |                             |
| 406           | 62   | male   | Past            | 42         | COPD                       | NULD  |                             |
| 407           | 74   | male   | Past            | 42         | COPD                       | NULD  |                             |
| 408           | 78   | male   | Past            | 42         | COPD                       | NULD  |                             |
| 409           | 65   | female | Past            | 42         | COPD                       | NULD  |                             |
| 410           | 62   | female | Past            | 42         | COPD                       | NULD  |                             |
| 411           | 70   | female | Present         | 42         | COPD                       | NULD  |                             |
| 412           | 57   | female | Present         | 42         | COPD                       | NULD  |                             |
| 413           | 56   | female | Present         | 42         | COPD                       | NULD  |                             |
| 414           | 75   | female | Present         | 42         | COPD                       | NULD  |                             |
| 415           | 62   | male   | Present         | 41.4       | HC                         | HC    |                             |
| 416           | 75   | male   | Past            | 41.25      | COPD                       | NULD  |                             |
| 417           | 72   | female | Past            | 41.25      | COPD                       | NULD  |                             |
| 418           | 69   | male   | Past            | 41         | COPD                       | NULD  |                             |
| 419           | 74   | female | Past            | 41         | COPD                       | NULD  |                             |
| 420           | 63   | female | Past            | 41         | COPD                       | NULD  |                             |
| 421           | 66   | female | Past            | 41         | COPD                       | NULD  |                             |
| 422           | 69   | male   | Past            | 41         | COPD                       | NULD  |                             |
| 423           | 53   | male   | Present         | 41         | COPD                       | NULD  |                             |
| 424           | 63   | female | Present         | 40.85      | COPD                       | NULD  |                             |
| 425           | 65.9 | female | Past            | 40         | Non-Small Cell Lung Cancer | LCa   | 3                           |
| 426           | 43.5 | female | Past            | 40         | Non-Small Cell Lung Cancer | LCa   | 4                           |
| 427           | 71.6 | male   | Past            | 40         | Non-Small Cell Lung Cancer | LCa   |                             |
| 428           | 60.7 | male   | Past            | 40         | Non-Small Cell Lung Cancer | LCa   | 1                           |
| 429           | 55.5 | male   | Past            | 40         | Small Cell Lung Cancer     | LCa   | 2                           |
| 430           | 55.5 | male   | Past            | 40         | Small Cell Lung Cancer     | LCa   | 2                           |
| 431           | 74.6 | male   | Past            | 40         | Non-Small Cell Lung Cancer | LCa   | 3                           |

| Sample number | Age  | Gender | Smoking history | Pack years | Disease                    | Group | Stage (only tumor patients) |
|---------------|------|--------|-----------------|------------|----------------------------|-------|-----------------------------|
| 432           | 68.7 | male   | Past            | 40         | Small Cell Lung Cancer     | LCa   | 3                           |
| 433           | 69.6 | male   | Past            | 40         | Non-Small Cell Lung Cancer | LCa   | 4                           |
| 434           | 55.2 | male   | Past            | 40         | NPLD                       | NPLD  |                             |
| 435           | 79.2 | male   | Past            | 40         | Non-Small Cell Lung Cancer | LCa   | 1                           |
| 436           | 69.5 | male   | Past            | 40         | Non-Small Cell Lung Cancer | LCa   | 1                           |
| 437           | 78.7 | male   | Past            | 40         | Non-Small Cell Lung Cancer | LCa   | 2                           |
| 438           | 70.6 | male   | Past            | 40         | other Lung Carcinoma       | LCa   |                             |
| 439           | 71.1 | male   | Past            | 40         | other Lung Carcinoma       | LCa   |                             |
| 440           | 70.6 | male   | Past            | 40         | other Lung Carcinoma       | LCa   |                             |
| 441           | 74.5 | male   | Past            | 40         | Non-Small Cell Lung Cancer | LCa   | 3                           |
| 442           | 72   | female | Past            | 40         | HC                         | HC    |                             |
| 443           | 76   | female | Past            | 40         | HC                         | HC    |                             |
| 444           | 59   | female | Past            | 40         | COPD                       | NPLD  |                             |
| 445           | 74   | male   | Past            | 40         | COPD                       | NPLD  |                             |
| 446           | 70   | female | Past            | 40         | COPD                       | NPLD  |                             |
| 447           | 72   | male   | Past            | 40         | COPD                       | NPLD  |                             |
| 448           | 64.5 | male   | Present         | 40         | other Lung Carcinoma       | LCa   | 4                           |
| 449           | 63   | male   | Present         | 40         | Non-Small Cell Lung Cancer | LCa   | 4                           |
| 450           | 58   | female | Present         | 40         | Small Cell Lung Cancer     | LCa   | 4                           |
| 451           | 75.5 | female | Present         | 40         | Small Cell Lung Cancer     | LCa   | 3                           |
| 452           | 75.6 | female | Present         | 40         | Small Cell Lung Cancer     | LCa   | 3                           |
| 453           | 55   | female | Present         | 40         | Non-Small Cell Lung Cancer | LCa   | 1                           |
| 454           | 52.9 | male   | Present         | 40         | Non-Small Cell Lung Cancer | LCa   | 1                           |
| 455           | 52.5 | female | Present         | 40         | Non-Small Cell Lung Cancer | LCa   | 2                           |
| 456           | 79.8 | male   | Present         | 40         | Non-Small Cell Lung Cancer | LCa   | 2                           |
| 457           | 67.5 | female | Present         | 40         | Non-Small Cell Lung Cancer | LCa   | 3                           |
| 458           | 77.7 | male   | Present         | 40         | Small Cell Lung Cancer     | LCa   | 3                           |
| 459           | 74.6 | male   | Present         | 40         | Non-Small Cell Lung Cancer | LCa   | 3                           |
| 460           | 55.1 | female | Present         | 40         | Small Cell Lung Cancer     | LCa   | 4                           |
| 461           | 48.8 | male   | Present         | 40         | Small Cell Lung Cancer     | LCa   | 3                           |
| 462           | 53.8 | male   | Present         | 40         | Small Cell Lung Cancer     | LCa   | 4                           |



| Sample number | Age  | Gender | Smoking history | Pack years | Disease                    | Group | Stage (only tumor patients) |
|---------------|------|--------|-----------------|------------|----------------------------|-------|-----------------------------|
| 463           | 58.7 | male   | Present         | 40         | Non-Small Cell Lung Cancer | LCa   | 2                           |
| 464           | 58   | female | Present         | 40         | COPD                       | NTLD  |                             |
| 465           | 58.6 | male   | Present         | 40         | Non-Small Cell Lung Cancer | LCa   | 1                           |
| 466           | 68.5 | male   | Present         | 40         | Non-Small Cell Lung Cancer | LCa   | 1                           |
| 467           | 64.2 | male   | Present         | 40         | Non-Small Cell Lung Cancer | LCa   | 2                           |
| 468           | 52.6 | male   | Present         | 40         | Non-Small Cell Lung Cancer | LCa   | 2                           |
| 469           | 72.2 | male   | Present         | 40         | Non-Small Cell Lung Cancer | LCa   | 1                           |
| 470           | 64.4 | female | Present         | 40         | Non-Small Cell Lung Cancer | LCa   | 2                           |
| 471           | 61.9 | male   | Present         | 40         | Non-Small Cell Lung Cancer | LCa   | 1                           |
| 472           | 60.5 | female | Present         | 40         | Non-Small Cell Lung Cancer | LCa   | 1                           |
| 473           | 59.4 | female | Present         | 40         | Non-Small Cell Lung Cancer | LCa   | 1                           |
| 474           | 52.2 | male   | Present         | 40         | Non-Small Cell Lung Cancer | LCa   | 2                           |
| 475           | 67.3 | male   | Present         | 40         | other Lung Carcinoma       | LCa   |                             |
| 476           | 74.9 | female | Present         | 40         | other Lung Carcinoma       | LCa   |                             |
| 477           | 61   | male   | Present         | 40         | NLTD                       | NLTD  |                             |
| 478           | 73.3 | male   | Present         | 40         | Non-Small Cell Lung Cancer | LCa   | 1                           |
| 479           | 62.1 | male   | Present         | 40         | Non-Small Cell Lung Cancer | LCa   | 2                           |
| 480           | 60   | female | Present         | 40         | HC                         | HC    |                             |
| 481           | 58   | female | Present         | 40         | COPD                       | NLTD  |                             |
| 482           | 54   | female | Present         | 40         | COPD                       | NLTD  |                             |
| 483           | 72   | male   | Past            | 39.75      | COPD                       | NLTD  |                             |
| 484           | 59   | female | Past            | 39.6       | COPD                       | NLTD  |                             |
| 485           | 67   | male   | Present         | 39.375     | HC                         | HC    |                             |
| 486           | 56   | female | Past            | 39         | COPD                       | NLTD  |                             |
| 487           | 55   | male   | Past            | 39         | COPD                       | NLTD  |                             |
| 488           | 57   | female | Past            | 39         | COPD                       | NLTD  |                             |
| 489           | 64   | female | Past            | 39         | COPD                       | NLTD  |                             |
| 490           | 52   | female | Present         | 39         | COPD                       | NLTD  |                             |
| 491           | 67   | male   | Present         | 39         | COPD                       | NLTD  |                             |
| 492           | 67   | female | Past            | 38.85      | COPD                       | NLTD  |                             |
| 493           | 69   | female | Past            | 38.25      | COPD                       | NLTD  |                             |

| Sample number | Age  | Gender | Smoking history | Pack years | Disease                    | Group | Stage (only tumor patients) |
|---------------|------|--------|-----------------|------------|----------------------------|-------|-----------------------------|
| 494           | 67   | female | Present         | 38.25      | COPD                       | NULD  |                             |
| 495           | 59   | female | Past            | 38         | COPD                       | NULD  |                             |
| 496           | 58   | male   | Past            | 38         | COPD                       | NULD  |                             |
| 497           | 54   | female | Past            | 38         | COPD                       | NULD  |                             |
| 498           | 63   | male   | Past            | 37.5       | COPD                       | NULD  |                             |
| 499           | 56   | female | Past            | 37.5       | COPD                       | NULD  |                             |
| 500           | 64   | female | Past            | 37         | COPD                       | NULD  |                             |
| 501           | 72   | female | Past            | 37         | COPD                       | NULD  |                             |
| 502           | 62   | male   | Past            | 37         | COPD                       | NULD  |                             |
| 503           | 57   | male   | Past            | 37         | COPD                       | NULD  |                             |
| 504           | 77   | female | Past            | 37         | COPD                       | NULD  |                             |
| 505           | 64   | male   | Present         | 36.75      | COPD                       | NULD  |                             |
| 506           | 64   | female | Present         | 36.75      | COPD                       | NULD  |                             |
| 507           | 77   | male   | Present         | 36.6       | COPD                       | NULD  |                             |
| 508           | 62   | male   | Past            | 36.25      | COPD                       | NULD  |                             |
| 509           | 60   | female | Past            | 36         | COPD                       | NULD  |                             |
| 510           | 53   | male   | Past            | 36         | COPD                       | NULD  |                             |
| 511           | 72   | male   | Past            | 36         | COPD                       | NULD  |                             |
| 512           | 61   | female | Past            | 36         | COPD                       | NULD  |                             |
| 513           | 61   | male   | Past            | 36         | COPD                       | NULD  |                             |
| 514           | 50   | male   | Present         | 36         | COPD                       | NULD  |                             |
| 515           | 65   | female | Past            | 35.25      | COPD                       | NULD  |                             |
| 516           | 64   | female | Present         | 35.25      | COPD                       | NULD  |                             |
| 517           | 55.6 | male   | Past            | 35         | Small Cell Lung Cancer     | LCa   | 2                           |
| 518           | 57.1 | male   | Past            | 35         | Small Cell Lung Cancer     | LCa   | 4                           |
| 519           | 70.4 | male   | Past            | 35         | Non-Small Cell Lung Cancer | LCa   | 2                           |
| 520           | 72.7 | male   | Past            | 35         | Small Cell Lung Cancer     | LCa   | 3                           |
| 521           | 62   | female | Past            | 35         | Non-Small Cell Lung Cancer | LCa   | 3                           |
| 522           | 54.7 | male   | Past            | 35         | Small Cell Lung Cancer     | LCa   | 4                           |
| 523           | 54.8 | male   | Past            | 35         | Small Cell Lung Cancer     | LCa   | 4                           |
| 524           | 65.2 | male   | Past            | 35         | COPD                       | NULD  |                             |
| 525           | 67.3 | male   | Past            | 35         | Non-Small Cell Lung Cancer | LCa   | 1                           |
| 526           | 64.1 | male   | Past            | 35         | Non-Small Cell Lung Cancer | LCa   | 2                           |
| 527           | 63   | male   | Past            | 35         | HC                         | HC    |                             |
| 528           | 67   | male   | Past            | 35         | HC                         | HC    |                             |

| Sample number | Age  | Gender | Smoking history | Pack years | Disease                    | Group | Stage (only tumor patients) |
|---------------|------|--------|-----------------|------------|----------------------------|-------|-----------------------------|
| 529           | 68.3 | male   | Present         | 35         | Non-Small Cell Lung Cancer | LCa   | 1                           |
| 530           | 55.3 | female | Present         | 35         | Non-Small Cell Lung Cancer | LCa   | 2                           |
| 531           | 59.1 | male   | Present         | 35         | Non-Small Cell Lung Cancer | LCa   | 3                           |
| 532           | 62   | male   | Present         | 35         | Small Cell Lung Cancer     | LCa   | 4                           |
| 533           | 52   | female | Present         | 35         | Small Cell Lung Cancer     | LCa   | 2                           |
| 534           | 49.4 | female | Present         | 35         | Non-Small Cell Lung Cancer | LCa   | 2                           |
| 535           | 64   | male   | Present         | 35         | Non-Small Cell Lung Cancer | LCa   | 1                           |
| 536           | 65.7 | female | Present         | 35         | Non-Small Cell Lung Cancer | LCa   | 1                           |
| 537           | 54.1 | female | Present         | 35         | Non-Small Cell Lung Cancer | LCa   | 1                           |
| 538           | 50   | male   | Present         | 35         | Non-Small Cell Lung Cancer | LCa   | 3                           |
| 539           | 62.5 | male   | Present         | 35         | Non-Small Cell Lung Cancer | LCa   | 2                           |
| 540           | 52.6 | female | Present         | 35         | Non-Small Cell Lung Cancer | LCa   | 3                           |
| 541           | 79.1 | male   | Present         | 35         | Non-Small Cell Lung Cancer | LCa   | 2                           |
| 542           | 61.8 | male   | Present         | 35         | Non-Small Cell Lung Cancer | LCa   | 3                           |
| 543           | 60.2 | female | Present         | 35         | Non-Small Cell Lung Cancer | LCa   | 2                           |
| 544           | 49   | male   | Present         | 35         | COPD                       | NTLD  |                             |
| 545           | 77   | male   | Past            | 34.5       | HC                         | HC    |                             |
| 546           | 74   | male   | Past            | 34.5       | COPD                       | NTLD  |                             |
| 547           | 67   | male   | Past            | 34.5       | COPD                       | NTLD  |                             |
| 548           | 73   | female | Past            | 34.5       | COPD                       | NTLD  |                             |
| 549           | 57   | female | Past            | 34         | COPD                       | NTLD  |                             |
| 550           | 73   | male   | Past            | 34         | COPD                       | NTLD  |                             |
| 551           | 67   | male   | Past            | 34         | COPD                       | NTLD  |                             |
| 552           | 60   | male   | Past            | 34         | COPD                       | NTLD  |                             |
| 553           | 73   | male   | Past            | 34         | COPD                       | NTLD  |                             |
| 554           | 68   | male   | Past            | 34         | COPD                       | NTLD  |                             |
| 555           | 79   | male   | Past            | 34         | COPD                       | NTLD  |                             |
| 556           | 63   | female | Present         | 33.75      | HC                         | HC    |                             |
| 557           | 66   | male   | Present         | 33.75      | HC                         | HC    |                             |
| 558           | 61   | male   | Present         | 33.75      | COPD                       | NTLD  |                             |
| 559           | 72.8 | male   | Past            | 33         | NTLD                       | NTLD  |                             |

| Sample number | Age  | Gender | Smoking history | Pack years | Disease                    | Group | Stage (only tumor patients) |
|---------------|------|--------|-----------------|------------|----------------------------|-------|-----------------------------|
| 560           | 67   | male   | Past            | 33         | COPD                       | NTLD  |                             |
| 561           | 58   | male   | Present         | 33         | COPD                       | NTLD  |                             |
| 562           | 51   | female | Present         | 32.25      | COPD                       | NTLD  |                             |
| 563           | 73   | male   | Past            | 31.5       | COPD                       | NTLD  |                             |
| 564           | 55   | female | Present         | 31.5       | COPD                       | NTLD  |                             |
| 565           | 78   | male   | Present         | 31.5       | COPD                       | NTLD  |                             |
| 566           | 62   | male   | Past            | 31.25      | HC                         | HC    |                             |
| 567           | 63   | male   | Past            | 31.2       | COPD                       | NTLD  |                             |
| 568           | 71   | male   | Past            | 31         | COPD                       | NTLD  |                             |
| 569           | 62   | female | Past            | 31         | COPD                       | NTLD  |                             |
| 570           | 68   | female | Past            | 31         | COPD                       | NTLD  |                             |
| 571           | 57   | male   | Present         | 30.75      | COPD                       | NTLD  |                             |
| 572           | 59   | male   | Present         | 30.75      | COPD                       | NTLD  |                             |
| 573           | 66   | female | Present         | 30.6       | COPD                       | NTLD  |                             |
| 574           | 64   | male   | Present         | 30.6       | COPD                       | NTLD  |                             |
| 575           | 79.5 | male   | Past            | 30         | Non-Small Cell Lung Cancer | LCa   | 4                           |
| 576           | 53.9 | male   | Past            | 30         | Non-Small Cell Lung Cancer | LCa   | 3                           |
| 577           | 51.2 | female | Past            | 30         | Small Cell Lung Cancer     | LCa   | 4                           |
| 578           | 63.7 | female | Past            | 30         | Non-Small Cell Lung Cancer | LCa   | 3                           |
| 579           | 58.3 | female | Past            | 30         | Small Cell Lung Cancer     | LCa   |                             |
| 580           | 58.3 | female | Past            | 30         | Small Cell Lung Cancer     | LCa   |                             |
| 581           | 75.8 | male   | Past            | 30         | Non-Small Cell Lung Cancer | LCa   | 1                           |
| 582           | 61   | male   | Past            | 30         | Non-Small Cell Lung Cancer | LCa   | 3                           |
| 583           | 81.3 | female | Past            | 30         | Small Cell Lung Cancer     | LCa   | 4                           |
| 584           | 70.4 | female | Past            | 30         | Small Cell Lung Cancer     | LCa   | 4                           |
| 585           | 70.5 | female | Past            | 30         | Small Cell Lung Cancer     | LCa   | 4                           |
| 586           | 60   | male   | Past            | 30         | NTLD                       | NTLD  |                             |
| 587           | 59.9 | male   | Past            | 30         | NTLD                       | NTLD  |                             |
| 588           | 67.9 | male   | Past            | 30         | Non-Small Cell Lung Cancer | LCa   | 2                           |
| 589           | 72   | male   | Past            | 30         | Non-Small Cell Lung Cancer | LCa   | 2                           |
| 590           | 61.8 |        | Past            | 30         | other Lung Carcinoma       | LCa   | 1                           |
| 591           | 72.8 | male   | Past            | 30         | Non-Small Cell Lung Cancer | LCa   | 2                           |
| 592           | 59.9 | male   | Past            | 30         | other Lung Carcinoma       | LCa   |                             |

| Sample number | Age  | Gender | Smoking history | Pack years | Disease                    | Group | Stage (only tumor patients) |
|---------------|------|--------|-----------------|------------|----------------------------|-------|-----------------------------|
| 593           | 70.6 | female | Past            | 30         | Non-Small Cell Lung Cancer | LCa   | 3                           |
| 594           | 71.1 | female | Past            | 30         | Non-Small Cell Lung Cancer | LCa   | 1                           |
| 595           | 70.6 | female | Past            | 30         | Non-Small Cell Lung Cancer | LCa   | 3                           |
| 596           | 72.7 | male   | Past            | 30         | other Lung Carcinoma       | LCa   | 3                           |
| 597           | 67   | male   | Past            | 30         | HC                         | HC    |                             |
| 598           | 67   | male   | Past            | 30         | HC                         | HC    |                             |
| 599           | 67   | male   | Past            | 30         | HC                         | HC    |                             |
| 600           | 67   | male   | Past            | 30         | COPD                       | NULD  |                             |
| 601           | 77   | male   | Past            | 30         | COPD                       | NULD  |                             |
| 602           | 58   | female | Past            | 30         | COPD                       | NULD  |                             |
| 603           | 79.7 | male   | Present         | 30         | Non-Small Cell Lung Cancer | LCa   | 2                           |
| 604           | 68.8 | male   | Present         | 30         | Non-Small Cell Lung Cancer | LCa   | 4                           |
| 605           | 62.9 | female | Present         | 30         | Non-Small Cell Lung Cancer | LCa   | 2                           |
| 606           | 55.5 | female | Present         | 30         | Non-Small Cell Lung Cancer | LCa   | 2                           |
| 607           | 51   | female | Present         | 30         | Non-Small Cell Lung Cancer | LCa   | 2                           |
| 608           | 52.9 | male   | Present         | 30         | Non-Small Cell Lung Cancer | LCa   | 3                           |
| 609           | 76.8 | male   | Present         | 30         | Non-Small Cell Lung Cancer | LCa   | 3                           |
| 610           | 62.5 | male   | Present         | 30         | Non-Small Cell Lung Cancer | LCa   | 3                           |
| 611           | 62.6 | female | Present         | 30         | Non-Small Cell Lung Cancer | LCa   | 3                           |
| 612           | 73.2 | male   | Present         | 30         | Non-Small Cell Lung Cancer | LCa   | 2                           |
| 613           | 70.1 | female | Present         | 30         | Non-Small Cell Lung Cancer | LCa   | 2                           |
| 614           | 77.3 | male   | Present         | 30         | Non-Small Cell Lung Cancer | LCa   | 1                           |
| 615           | 52.9 | male   | Present         | 30         | Small Cell Lung Cancer     | LCa   | 2                           |
| 616           | 66.4 | female | Present         | 30         | Non-Small Cell Lung Cancer | LCa   | 3                           |
| 617           | 84.7 | male   | Present         | 30         | Non-Small Cell Lung Cancer | LCa   | 2                           |
| 618           | 59   | female | Present         | 30         | other Lung Carcinoma       | LCa   |                             |
| 619           | 48.3 | male   | Present         | 30         | other Lung Carcinoma       | LCa   | 2                           |
| 620           | 54   | male   | Present         | 30         | Non-Small Cell Lung Cancer | LCa   | 2                           |

| Sample number | Age  | Gender | Smoking history | Pack years | Disease                    | Group | Stage (only tumor patients) |
|---------------|------|--------|-----------------|------------|----------------------------|-------|-----------------------------|
| 621           | 45.9 | male   | Present         | 30         | other Lung Carcinoma       | LCa   |                             |
| 622           | 73   | male   | Present         | 30         | HC                         | HC    |                             |
| 623           | 64   | male   | Past            | 29.25      | COPD                       | NULD  |                             |
| 624           | 64   | female | Past            | 29         | COPD                       | NULD  |                             |
| 625           | 73   | male   | Past            | 29         | COPD                       | NULD  |                             |
| 626           | 63   | female | Past            | 29         | COPD                       | NULD  |                             |
| 627           | 78   | male   | Past            | 29         | COPD                       | NULD  |                             |
| 628           | 44   | male   | Present         | 29         | COPD                       | NULD  |                             |
| 629           | 76   | female | Present         | 28.6       | COPD                       | NULD  |                             |
| 630           | 59   | male   | Past            | 28         | HC                         | HC    |                             |
| 631           | 66   | male   | Past            | 28         | COPD                       | NULD  |                             |
| 632           | 52   | male   | Past            | 28         | COPD                       | NULD  |                             |
| 633           | 55   | female | Past            | 28         | COPD                       | NULD  |                             |
| 634           | 71   | male   | Present         | 28         | COPD                       | NULD  |                             |
| 635           | 52   | male   | Present         | 27.75      | COPD                       | NULD  |                             |
| 636           | 67   | male   | Past            | 27         | COPD                       | NULD  |                             |
| 637           | 81   | male   | Past            | 27         | COPD                       | NULD  |                             |
| 638           | 52   | female | Present         | 27         | COPD                       | NULD  |                             |
| 639           | 72   | male   | Present         | 26.5       | COPD                       | NULD  |                             |
| 640           | 69   | female | Past            | 26.4       | COPD                       | NULD  |                             |
| 641           | 68   | male   | Present         | 26.4       | COPD                       | NULD  |                             |
| 642           | 76   | male   | Past            | 26.25      | COPD                       | NULD  |                             |
| 643           | 58   | male   | Past            | 26.25      | COPD                       | NULD  |                             |
| 644           | 62   | female | Past            | 26.125     | HC                         | HC    |                             |
| 645           | 65   | male   | Past            | 26         | HC                         | HC    |                             |
| 646           | 48   | male   | Past            | 26         | COPD                       | NULD  |                             |
| 647           | 69   | male   | Past            | 26         | COPD                       | NULD  |                             |
| 648           | 67   | male   | Past            | 26         | COPD                       | NULD  |                             |
| 649           | 72   | male   | Past            | 26         | COPD                       | NULD  |                             |
| 650           | 66   | female | Present         | 26         | COPD                       | NULD  |                             |
| 651           | 73   | male   | Past            | 25.8       | COPD                       | NULD  |                             |
| 652           | 73   | male   | Past            | 25.5       | COPD                       | NULD  |                             |
| 653           | 63   | female | Present         | 25.5       | COPD                       | NULD  |                             |
| 654           | 62.4 | male   | Past            | 25         | Non-Small Cell Lung Cancer | LCa   | 3                           |
| 655           | 64.5 | female | Past            | 25         | Non-Small Cell Lung Cancer | LCa   | 3                           |
| 656           | 66.8 | female | Past            | 25         | Non-Small Cell Lung Cancer | LCa   | 4                           |

| Sample number | Age  | Gender | Smoking history | Pack years | Disease                    | Group | Stage (only tumor patients) |
|---------------|------|--------|-----------------|------------|----------------------------|-------|-----------------------------|
| 657           | 72.6 | male   | Past            | 25         | Small Cell Lung Cancer     | LCa   | 2                           |
| 658           | 54.1 | female | Past            | 25         | Non-Small Cell Lung Cancer | LCa   | 2                           |
| 659           | 64.8 | male   | Past            | 25         | Non-Small Cell Lung Cancer | LCa   | 2                           |
| 660           | 64.6 | male   | Past            | 25         | Non-Small Cell Lung Cancer | LCa   | 2                           |
| 661           | 74   | female | Past            | 25         | HC                         | HC    |                             |
| 662           | 65   | male   | Past            | 25         | HC                         | HC    |                             |
| 663           | 60   | male   | Past            | 25         | COPD                       | NTLD  |                             |
| 664           | 75.9 | male   | Present         | 25         | Non-Small Cell Lung Cancer | LCa   | 2                           |
| 665           | 40.7 | male   | Present         | 25         | Non-Small Cell Lung Cancer | LCa   | 2                           |
| 666           | 65.2 | female | Present         | 25         | Non-Small Cell Lung Cancer | LCa   | 4                           |
| 667           | 41.7 | male   | Present         | 25         | Non-Small Cell Lung Cancer | LCa   | 2                           |
| 668           | 52.7 | female | Present         | 25         | Non-Small Cell Lung Cancer | LCa   | 2                           |
| 669           | 57.5 | male   | Present         | 25         | Non-Small Cell Lung Cancer | LCa   | 2                           |
| 670           | 69   | male   | Present         | 25         | COPD                       | NTLD  |                             |
| 671           | 51   | male   | Past            | 24.75      | COPD                       | NTLD  |                             |
| 672           | 79   | male   | Past            | 24.75      | COPD                       | NTLD  |                             |
| 673           | 68   | male   | Past            | 24.75      | COPD                       | NTLD  |                             |
| 674           | 68   | female | Present         | 24.5       | COPD                       | NTLD  |                             |
| 675           | 63   | female | Present         | 24.5       | COPD                       | NTLD  |                             |
| 676           | 60   | female | Past            | 24         | COPD                       | NTLD  |                             |
| 677           | 76   | male   | Past            | 24         | COPD                       | NTLD  |                             |
| 678           | 72   | female | Past            | 24         | COPD                       | NTLD  |                             |
| 679           | 52.9 | female | Past            | 23         | Small Cell Lung Cancer     | LCa   | 4                           |
| 680           | 52.9 | female | Past            | 23         | Small Cell Lung Cancer     | LCa   | 4                           |
| 681           | 60   | female | Past            | 23         | COPD                       | NTLD  |                             |
| 682           | 52   | female | Past            | 23         | COPD                       | NTLD  |                             |
| 683           | 74   | female | Past            | 23         | COPD                       | NTLD  |                             |
| 684           | 77.6 | male   | Present         | 23         | Non-Small Cell Lung Cancer | LCa   | 3                           |
| 685           | 62   | male   | Present         | 22.75      | HC                         | HC    |                             |
| 686           | 68   | male   | Past            | 22.5       | HC                         | HC    |                             |
| 687           | 69   | male   | Past            | 22.5       | COPD                       | NTLD  |                             |
| 688           | 75   | female | Past            | 22.5       | COPD                       | NTLD  |                             |

| Sample number | Age  | Gender | Smoking history | Pack years | Disease                    | Group | Stage (only tumor patients) |
|---------------|------|--------|-----------------|------------|----------------------------|-------|-----------------------------|
| 689           | 60   | male   | Past            | 22.5       | COPD                       | NTLD  |                             |
| 690           | 59   | female | Present         | 22.5       | COPD                       | NTLD  |                             |
| 691           | 60   | male   | Present         | 22.5       | COPD                       | NTLD  |                             |
| 692           | 73   | female | Past            | 22         | COPD                       | NTLD  |                             |
| 693           | 76   | female | Past            | 21.6       | COPD                       | NTLD  |                             |
| 694           | 73   | male   | Past            | 21         | COPD                       | NTLD  |                             |
| 695           | 73   | male   | Past            | 21         | COPD                       | NTLD  |                             |
| 696           | 58   | male   | Present         | 21         | COPD                       | NTLD  |                             |
| 697           | 58   | female | Present         | 20.4       | COPD                       | NTLD  |                             |
| 698           | 61   | female | Past            | 20.25      | COPD                       | NTLD  |                             |
| 699           | 67.6 | male   | Past            | 20         | Non-Small Cell Lung Cancer | LCa   | 2                           |
| 700           |      | male   | Past            | 20         | Non-Small Cell Lung Cancer | LCa   | 3                           |
| 701           | 64.7 | male   | Past            | 20         | Non-Small Cell Lung Cancer | LCa   | 2                           |
| 702           | 70.4 | female | Past            | 20         | Non-Small Cell Lung Cancer | LCa   | 2                           |
| 703           | 72.8 | male   | Past            | 20         | Non-Small Cell Lung Cancer | LCa   | 3                           |
| 704           | 73.3 | male   | Past            | 20         | Non-Small Cell Lung Cancer | LCa   | 3                           |
| 705           | 63.2 | female | Past            | 20         | Small Cell Lung Cancer     | LCa   | 4                           |
| 706           | 48.9 | male   | Past            | 20         | NTLD                       | NTLD  |                             |
| 707           | 56.3 | male   | Past            | 20         | NTLD                       | NTLD  |                             |
| 708           | 59.3 | male   | Past            | 20         | other Lung Carcinoma       | LCa   | 1                           |
| 709           | 71.6 | male   | Past            | 20         | Non-Small Cell Lung Cancer | LCa   | 2                           |
| 710           | 72.9 | male   | Past            | 20         | other Lung Carcinoma       | LCa   |                             |
| 711           | 70.3 | female | Past            | 20         | Non-Small Cell Lung Cancer | LCa   | 2                           |
| 712           | 73   | male   | Past            | 20         | HC                         | HC    |                             |
| 713           | 71   | male   | Past            | 20         | HC                         | HC    |                             |
| 714           | 76   | female | Past            | 20         | HC                         | HC    |                             |
| 715           | 64   | male   | Past            | 20         | HC                         | HC    |                             |
| 716           | 66   | male   | Past            | 20         | COPD                       | NTLD  |                             |
| 717           | 55   | female | Past            | 20         | COPD                       | NTLD  |                             |
| 718           | 80   | male   | Past            | 20         | COPD                       | NTLD  |                             |
| 719           | 69.7 | male   | Present         | 20         | Non-Small Cell Lung Cancer | LCa   | 2                           |
| 720           | 59.9 | female | Present         | 20         | Small Cell Lung Cancer     | LCa   | 4                           |



| Sample number | Age  | Gender | Smoking history | Pack years | Disease                    | Group | Stage (only tumor patients) |
|---------------|------|--------|-----------------|------------|----------------------------|-------|-----------------------------|
| 721           | 62   | male   | Present         | 20         | Non-Small Cell Lung Cancer | LCa   | 2                           |
| 722           | 55.5 | male   | Present         | 20         | Non-Small Cell Lung Cancer | LCa   | 1                           |
| 723           | 70.5 | male   | Present         | 20         | Non-Small Cell Lung Cancer | LCa   | 3                           |
| 724           | 77.5 | male   | Present         | 20         | Non-Small Cell Lung Cancer | LCa   | 3                           |
| 725           | 47.1 | female | Present         | 20         | Non-Small Cell Lung Cancer | LCa   | 3                           |
| 726           | 68   | female | Present         | 20         | HC                         | HC    |                             |
| 727           | 60   | female | Present         | 19.5       | COPD                       | NTLD  |                             |
| 728           | 71   | male   | Present         | 19.25      | COPD                       | NTLD  |                             |
| 729           | 62   | female | Past            | 19         | COPD                       | NTLD  |                             |
| 730           | 66   | male   | Past            | 19         | COPD                       | NTLD  |                             |
| 731           | 55   | male   | Present         | 18.9       | COPD                       | NTLD  |                             |
| 732           | 66   | male   | Past            | 18.75      | HC                         | HC    |                             |
| 733           | 71   | male   | Present         | 18.5       | COPD                       | NTLD  |                             |
| 734           | 61   | female | Present         | 18.4       | COPD                       | NTLD  |                             |
| 735           | 69   | male   | Past            | 18         | HC                         | HC    |                             |
| 736           | 65   | male   | Past            | 18         | HC                         | HC    |                             |
| 737           | 76   | male   | Past            | 18         | HC                         | HC    |                             |
| 738           | 72   | female | Past            | 18         | COPD                       | NTLD  |                             |
| 739           | 72   | female | Past            | 18         | COPD                       | NTLD  |                             |
| 740           | 72   | male   | Past            | 18         | COPD                       | NTLD  |                             |
| 741           | 72   | male   | Past            | 18         | COPD                       | NTLD  |                             |
| 742           | 67   | male   | Past            | 18         | COPD                       | NTLD  |                             |
| 743           | 67   | male   | Past            | 17.6       | HC                         | HC    |                             |
| 744           | 52   | male   | Present         | 17.5       | COPD                       | NTLD  |                             |
| 745           | 67   | male   | Past            | 17.25      | HC                         | HC    |                             |
| 746           | 65   | male   | Present         | 17.2       | HC                         | HC    |                             |
| 747           | 69   | male   | Past            | 17         | COPD                       | NTLD  |                             |
| 748           | 70   | male   | Present         | 16.8       | COPD                       | NTLD  |                             |
| 749           | 68   | male   | Past            | 16.5       | COPD                       | NTLD  |                             |
| 750           | 75   | male   | Past            | 16.5       | COPD                       | NTLD  |                             |
| 751           | 70   | male   | Present         | 16.5       | COPD                       | NTLD  |                             |
| 752           | 63   | female | Present         | 16.45      | COPD                       | NTLD  |                             |
| 753           | 63   | female | Present         | 16.45      | COPD                       | NTLD  |                             |
| 754           | 61   | male   | Past            | 16         | HC                         | HC    |                             |
| 755           | 76   | male   | Past            | 16         | COPD                       | NTLD  |                             |

| Sample number | Age  | Gender | Smoking history | Pack years | Disease                    | Group | Stage (only tumor patients) |
|---------------|------|--------|-----------------|------------|----------------------------|-------|-----------------------------|
| 756           | 58   | male   | Past            | 15.625     | HC                         | HC    |                             |
| 757           | 68   | male   | Present         | 15.3       | COPD                       | NTLD  |                             |
| 758           | 73.6 | male   | Past            | 15         | Non-Small Cell Lung Cancer | LCa   | 2                           |
| 759           | 59.2 | female | Past            | 15         | Non-Small Cell Lung Cancer | LCa   | 3                           |
| 760           | 55.6 | female | Past            | 15         | Non-Small Cell Lung Cancer | LCa   | 4                           |
| 761           | 64   | male   | Past            | 15         | other Lung Carcinoma       | LCa   |                             |
| 762           | 71.1 | female | Past            | 15         | other Lung Carcinoma       | LCa   | 2                           |
| 763           | 76.3 | female | Past            | 15         | Non-Small Cell Lung Cancer | LCa   | 1                           |
| 764           | 74.4 | male   | Past            | 15         | other Lung Carcinoma       | LCa   |                             |
| 765           | 61   | male   | Past            | 15         | HC                         | HC    |                             |
| 766           | 63   | male   | Past            | 15         | HC                         | HC    |                             |
| 767           | 63   | female | Past            | 15         | HC                         | HC    |                             |
| 768           | 63   | male   | Past            | 15         | HC                         | HC    |                             |
| 769           | 61   | male   | Past            | 15         | HC                         | HC    |                             |
| 770           | 61   | female | Past            | 15         | HC                         | HC    |                             |
| 771           | 69   | male   | Past            | 15         | HC                         | HC    |                             |
| 772           | 61   | female | Past            | 15         | HC                         | HC    |                             |
| 773           | 71   | female | Past            | 15         | HC                         | HC    |                             |
| 774           | 78   | male   | Past            | 15         | HC                         | HC    |                             |
| 775           | 72   | male   | Past            | 15         | COPD                       | NTLD  |                             |
| 776           | 65   | female | Past            | 15         | COPD                       | NTLD  |                             |
| 777           | 64.5 | female | Present         | 15         | Non-Small Cell Lung Cancer | LCa   | 2                           |
| 778           | 73   | female | Present         | 15         | COPD                       | NTLD  |                             |
| 779           | 73   | female | Present         | 14.7       | COPD                       | NTLD  |                             |
| 780           | 70   | male   | Present         | 14         | COPD                       | NTLD  |                             |
| 781           | 75   | male   | Present         | 14         | COPD                       | NTLD  |                             |
| 782           | 60   | male   | Present         | 13.65      | COPD                       | NTLD  |                             |
| 783           | 70   | female | Past            | 13.5       | COPD                       | NTLD  |                             |
| 784           | 61   | male   | Past            | 13.5       | COPD                       | NTLD  |                             |
| 785           | 63   | female | Past            | 13.2       | COPD                       | NTLD  |                             |
| 786           | 71   | female | Past            | 13.2       | COPD                       | NTLD  |                             |
| 787           | 69   | female | Past            | 13.125     | HC                         | HC    |                             |
| 788           | 63.3 | male   | Past            | 13         | Non-Small Cell Lung Cancer | LCa   | 4                           |
| 789           | 70   | male   | Past            | 12.5       | HC                         | HC    |                             |

| Sample number | Age  | Gender | Smoking history | Pack years | Disease                    | Group | Stage (only tumor patients) |
|---------------|------|--------|-----------------|------------|----------------------------|-------|-----------------------------|
| 790           | 62   | female | Past            | 12.5       | HC                         | HC    |                             |
| 791           | 78   | male   | Past            | 12.5       | HC                         | HC    |                             |
| 792           | 80   | male   | Past            | 12.5       | HC                         | HC    |                             |
| 793           | 46   | male   | Past            | 12.5       | COPD                       | NTLD  |                             |
| 794           | 64   | female | Present         | 12.5       | COPD                       | NTLD  |                             |
| 795           | 59.3 | female | Past            | 12         | Non-Small Cell Lung Cancer | LCa   | 4                           |
| 796           | 62   | female | Past            | 12         | HC                         | HC    |                             |
| 797           | 65   | male   | Past            | 12         | HC                         | HC    |                             |
| 798           | 72   | male   | Past            | 12         | HC                         | HC    |                             |
| 799           | 67   | male   | Past            | 12         | HC                         | HC    |                             |
| 800           | 64   | male   | Past            | 12         | COPD                       | NTLD  |                             |
| 801           | 55   | male   | Past            | 12         | COPD                       | NTLD  |                             |
| 802           | 83   | male   | Past            | 12         | COPD                       | NTLD  |                             |
| 803           | 78   | female | Past            | 11.9       | COPD                       | NTLD  |                             |
| 804           | 71   | female | Present         | 11.75      | COPD                       | NTLD  |                             |
| 805           | 55   | male   | Present         | 11.4       | COPD                       | NTLD  |                             |
| 806           | 66   | male   | Past            | 11.25      | HC                         | HC    |                             |
| 807           | 67   | male   | Past            | 11.25      | HC                         | HC    |                             |
| 808           | 47   | female | Present         | 11.2       | COPD                       | NTLD  |                             |
| 809           | 71   | male   | Past            | 11         | HC                         | HC    |                             |
| 810           | 83   | male   | Past            | 11         | COPD                       | NTLD  |                             |
| 811           | 80   | male   | Past            | 10.5       | COPD                       | NTLD  |                             |
| 812           | 71   | male   | Past            | 10.5       | COPD                       | NTLD  |                             |
| 813           | 40   | female | Present         | 10.5       | COPD                       | NTLD  |                             |
| 814           | 67   | female | Present         | 10.4       | COPD                       | NTLD  |                             |
| 815           | 68   | female | Past            | 10.25      | COPD                       | NTLD  |                             |
| 816           | 73.3 | female | Past            | 10         | Non-Small Cell Lung Cancer | LCa   | 4                           |
| 817           | 76   | male   | Past            | 10         | Non-Small Cell Lung Cancer | LCa   | 1                           |
| 818           | 71.7 | male   | Past            | 10         | Small Cell Lung Cancer     | LCa   | 4                           |
| 819           | 69.1 | male   | Past            | 10         | Non-Small Cell Lung Cancer | LCa   | 2                           |
| 820           | 60   | female | Past            | 10         | Non-Small Cell Lung Cancer | LCa   | 1                           |
| 821           | 70.9 | male   | Past            | 10         | Non-Small Cell Lung Cancer | LCa   | 2                           |
| 822           | 62   | male   | Past            | 10         | HC                         | HC    |                             |
| 823           | 69   | male   | Past            | 10         | HC                         | HC    |                             |

| Sample number | Age  | Gender | Smoking history | Pack years | Disease                    | Group | Stage (only tumor patients) |
|---------------|------|--------|-----------------|------------|----------------------------|-------|-----------------------------|
| 824           | 74   | female | Past            | 10         | HC                         | HC    |                             |
| 825           | 68   | male   | Past            | 10         | HC                         | HC    |                             |
| 826           | 72   | male   | Past            | 10         | HC                         | HC    |                             |
| 827           | 72   | male   | Past            | 10         | HC                         | HC    |                             |
| 828           | 74   | female | Past            | 10         | otherTumor                 | OD    |                             |
| 829           | 81   | female | Past            | 10         | COPD                       | NTLD  |                             |
| 830           | 54.7 | female | Present         | 10         | Non-Small Cell Lung Cancer | LCa   | 1                           |
| 831           | 74.4 | male   | Present         | 10         | Non-Small Cell Lung Cancer | LCa   | 3                           |
| 832           | 59.8 | female | Present         | 10         | Non-Small Cell Lung Cancer | LCa   | 2                           |
| 833           | 65.6 | female | Present         | 10         | Non-Small Cell Lung Cancer | LCa   | 2                           |
| 834           | 80   | male   | Present         | 10         | Non-Small Cell Lung Cancer | LCa   | 2                           |
| 835           | 63   | male   | Present         | 9.8        | COPD                       | NTLD  |                             |
| 836           | 62   | female | Past            | 9.75       | COPD                       | NTLD  |                             |
| 837           | 67   | male   | Present         | 9.6        | COPD                       | NTLD  |                             |
| 838           | 65   | female | Present         | 9.6        | COPD                       | NTLD  |                             |
| 839           | 50   | female | Present         | 9.5        | COPD                       | NTLD  |                             |
| 840           | 69   | male   | Past            | 9.375      | HC                         | HC    |                             |
| 841           | 68   | female | Past            | 9          | HC                         | HC    |                             |
| 842           | 74   | male   | Past            | 9          | COPD                       | NTLD  |                             |
| 843           | 66   | female | Past            | 9          | COPD                       | NTLD  |                             |
| 844           | 57   | female | Past            | 9          | COPD                       | NTLD  |                             |
| 845           | 59   | male   | Present         | 9          | COPD                       | NTLD  |                             |
| 846           | 63   | female | Present         | 8.8        | COPD                       | NTLD  |                             |
| 847           | 74   | female | Past            | 8.75       | COPD                       | NTLD  |                             |
| 848           | 72   | male   | Past            | 8.6        | COPD                       | NTLD  |                             |
| 849           | 80   | male   | Past            | 8.5        | COPD                       | NTLD  |                             |
| 850           | 62   | female | Present         | 8.5        | HC                         | HC    |                             |
| 851           | 58   | male   | Present         | 8.4        | COPD                       | NTLD  |                             |
| 852           | 69   | male   | Present         | 8.1        | COPD                       | NTLD  |                             |
| 853           | 65.2 | female | Past            | 8          | Small Cell Lung Cancer     | LCa   | 4                           |
| 854           | 75   | female | Past            | 8          | HC                         | HC    |                             |
| 855           | 60   | male   | Past            | 8          | HC                         | HC    |                             |
| 856           | 68   | male   | Past            | 8          | HC                         | HC    |                             |
| 857           | 70   | male   | Present         | 7.95       | COPD                       | NTLD  |                             |
| 858           | 69   | male   | Past            | 7.8        | COPD                       | NTLD  |                             |

| Sample number | Age  | Gender | Smoking history | Pack years | Disease                    | Group | Stage (only tumor patients) |
|---------------|------|--------|-----------------|------------|----------------------------|-------|-----------------------------|
| 859           | 75   | male   | Past            | 7.6        | COPD                       | NULD  |                             |
| 860           | 74.5 | male   | Past            | 7.5        | Non-Small Cell Lung Cancer | LCa   | 4                           |
| 861           | 63   | male   | Past            | 7.5        | HC                         | HC    |                             |
| 862           | 61   | female | Past            | 7.5        | HC                         | HC    |                             |
| 863           | 70   | male   | Past            | 7.5        | HC                         | HC    |                             |
| 864           | 68   | female | Past            | 7.5        | HC                         | HC    |                             |
| 865           | 64   | male   | Past            | 7.5        | HC                         | HC    |                             |
| 866           | 59   | female | Past            | 7.5        | HC                         | HC    |                             |
| 867           | 64   | female | Past            | 7.5        | HC                         | HC    |                             |
| 868           | 67   | female | Past            | 7.5        | HC                         | HC    |                             |
| 869           | 68   | male   | Past            | 7.5        | HC                         | HC    |                             |
| 870           | 60   | female | Past            | 7.5        | HC                         | HC    |                             |
| 871           | 68   | male   | Past            | 7.5        | HC                         | HC    |                             |
| 872           | 63   | male   | Present         | 7.35       | COPD                       | NULD  |                             |
| 873           | 75   | female | Past            | 7.25       | COPD                       | NULD  |                             |
| 874           | 71   | male   | Present         | 7.05       | COPD                       | NULD  |                             |
| 875           | 66   | male   | Past            | 7          | COPD                       | NULD  |                             |
| 876           | 55   | female | Past            | 7          | COPD                       | NULD  |                             |
| 877           | 60   | female | Present         | 6.9        | COPD                       | NULD  |                             |
| 878           | 61   | male   | Past            | 6.75       | COPD                       | NULD  |                             |
| 879           | 84   | female | Past            | 6.75       | COPD                       | NULD  |                             |
| 880           | 67   | male   | Present         | 6.45       | COPD                       | NULD  |                             |
| 881           | 66   | male   | Past            | 6          | HC                         | HC    |                             |
| 882           | 62   | female | Past            | 5.6        | HC                         | HC    |                             |
| 883           | 60   | male   | Past            | 5.5        | HC                         | HC    |                             |
| 884           | 71   | male   | Past            | 5.5        | HC                         | HC    |                             |
| 885           | 58   | male   | Past            | 5.5        | HC                         | HC    |                             |
| 886           | 73   | male   | Past            | 5.5        | COPD                       | NULD  |                             |
| 887           | 66   | male   | Past            | 5.5        | COPD                       | NULD  |                             |
| 888           | 75   | male   | Past            | 5.25       | HC                         | HC    |                             |
| 889           | 72   | male   | Past            | 5.1        | HC                         | HC    |                             |
| 890           | 72   | male   | Past            | 5.1        | otherTumor                 | OD    |                             |
| 891           | 77.2 | female | Past            | 5          | Small Cell Lung Cancer     | LCa   | 4                           |
| 892           | 79.7 | male   | Past            | 5          | NULD                       | NULD  |                             |
| 893           | 50   | female | Past            | 5          | NULD                       | NULD  |                             |
| 894           | 49.6 | female | Past            | 5          | Non-Small Cell Lung Cancer | LCa   | 2                           |

| Sample number | Age  | Gender | Smoking history | Pack years | Disease              | Group | Stage (only tumor patients) |
|---------------|------|--------|-----------------|------------|----------------------|-------|-----------------------------|
| 895           | 58.5 | female | Past            | 5          | other Lung Carcinoma | LCa   |                             |
| 896           | 63   | male   | Past            | 5          | HC                   | HC    |                             |
| 897           | 77   | male   | Past            | 5          | HC                   | HC    |                             |
| 898           | 62   | female | Past            | 5          | HC                   | HC    |                             |
| 899           | 78   | male   | Past            | 5          | HC                   | HC    |                             |
| 900           | 62   | male   | Past            | 5          | HC                   | HC    |                             |
| 901           | 69   | male   | Past            | 5          | HC                   | HC    |                             |
| 902           | 66   | male   | Past            | 5          | HC                   | HC    |                             |
| 903           | 65   | female | Past            | 5          | HC                   | HC    |                             |
| 904           | 72   | female | Present         | 4.9        | COPD                 | NTLD  |                             |
| 905           | 66   | male   | Present         | 4.9        | COPD                 | NTLD  |                             |
| 906           | 48   | female | Present         | 4.8        | COPD                 | NTLD  |                             |
| 907           | 66   | female | Past            | 4.5        | HC                   | HC    |                             |
| 908           | 70   | female | Past            | 4.5        | HC                   | HC    |                             |
| 909           | 56   | female | Past            | 4.5        | COPD                 | NTLD  |                             |
| 910           | 70   | male   | Past            | 4.5        | COPD                 | NTLD  |                             |
| 911           | 63   | female | Present         | 4.5        | HC                   | HC    |                             |
| 912           | 44   | female | Present         | 4.05       | COPD                 | NTLD  |                             |
| 913           | 68   | female | Past            | 4          | HC                   | HC    |                             |
| 914           | 56   | female | Present         | 3.9        | COPD                 | NTLD  |                             |
| 915           | 62   | female | Past            | 3.75       | HC                   | HC    |                             |
| 916           | 65   | female | Past            | 3.75       | HC                   | HC    |                             |
| 917           | 81   | female | Past            | 3.6        | COPD                 | NTLD  |                             |
| 918           | 70   | male   | Past            | 3.6        | COPD                 | NTLD  |                             |
| 919           | 71   | male   | Past            | 3.5        | HC                   | HC    |                             |
| 920           | 66   | male   | Past            | 3.5        | HC                   | HC    |                             |
| 921           | 68   | male   | Past            | 3.5        | HC                   | HC    |                             |
| 922           | 74   | female | Past            | 3.375      | HC                   | HC    |                             |
| 923           | 73   | male   | Past            | 3.3        | COPD                 | NTLD  |                             |
| 924           | 69   | male   | Past            | 3          | HC                   | HC    |                             |
| 925           | 74   | female | Past            | 3          | COPD                 | NTLD  |                             |
| 926           | 70   | female | Present         | 2.8        | COPD                 | NTLD  |                             |
| 927           | 72   | male   | Present         | 2.8        | COPD                 | NTLD  |                             |
| 928           | 67   | male   | Past            | 2.75       | HC                   | HC    |                             |
| 929           | 65   | female | Past            | 2.7        | HC                   | HC    |                             |
| 930           | 61   | female | Past            | 2.5        | HC                   | HC    |                             |
| 931           | 66   | female | Past            | 2.5        | HC                   | HC    |                             |

| Sample number | Age | Gender | Smoking history | Pack years | Disease | Group | Stage (only tumor patients) |
|---------------|-----|--------|-----------------|------------|---------|-------|-----------------------------|
| 932           | 62  | female | Past            | 2.5        | HC      | HC    |                             |
| 933           | 68  | male   | Past            | 2.5        | HC      | HC    |                             |
| 934           | 58  | female | Present         | 2.5        | HC      | HC    |                             |
| 935           | 69  | male   | Past            | 2.4        | COPD    | NTLD  |                             |
| 936           | 64  | male   | Present         | 2.4        | COPD    | NTLD  |                             |
| 937           | 72  | female | Past            | 2.25       | HC      | HC    |                             |
| 938           | 56  | female | Past            | 2.25       | HC      | HC    |                             |
| 939           | 73  | male   | Present         | 2.2        | COPD    | NTLD  |                             |
| 940           | 66  | male   | Past            | 2          | HC      | HC    |                             |
| 941           | 66  | male   | Past            | 2          | HC      | HC    |                             |
| 942           | 74  | female | Past            | 2          | HC      | HC    |                             |
| 943           | 64  | male   | Past            | 2          | HC      | HC    |                             |
| 944           | 76  | female | Past            | 1.875      | HC      | HC    |                             |
| 945           | 75  | female | Past            | 1.8        | HC      | HC    |                             |
| 946           | 79  | male   | Past            | 1.8        | COPD    | NTLD  |                             |
| 947           | 59  | female | Past            | 1.5        | HC      | HC    |                             |
| 948           | 60  | male   | Past            | 1.5        | HC      | HC    |                             |
| 949           | 71  | female | Past            | 1.5        | HC      | HC    |                             |
| 950           | 65  | female | Past            | 1.5        | HC      | HC    |                             |
| 951           | 78  | male   | Past            | 1.5        | COPD    | NTLD  |                             |
| 952           | 65  | male   | Present         | 1.5        | HC      | HC    |                             |
| 953           | 64  | female | Past            | 1.25       | HC      | HC    |                             |
| 954           | 63  | female | Past            | 1.25       | HC      | HC    |                             |
| 955           | 67  | male   | Past            | 1.25       | HC      | HC    |                             |
| 956           | 71  | female | Past            | 1.25       | HC      | HC    |                             |
| 957           | 63  | female | Past            | 1.2        | HC      | HC    |                             |
| 958           | 67  | female | Past            | 1          | HC      | HC    |                             |
| 959           | 66  | male   | Past            | 1          | HC      | HC    |                             |
| 960           | 66  | female | Past            | 1          | HC      | HC    |                             |
| 961           | 67  | female | Past            | 1          | HC      | HC    |                             |
| 962           | 68  | male   | Past            | 1          | COPD    | NTLD  |                             |
| 963           | 63  | male   | Past            | 0.75       | HC      | HC    |                             |
| 964           | 59  | male   | Past            | 0.75       | HC      | HC    |                             |
| 965           | 59  | male   | Past            | 0.75       | COPD    | NTLD  |                             |
| 966           | 60  | male   | Past            | 0.6        | HC      | HC    |                             |
| 967           | 64  | female | Past            | 0.6        | HC      | HC    |                             |
| 968           | 73  | female | Past            | 0.6        | COPD    | NTLD  |                             |

| Sample number | Age  | Gender | Smoking history | Pack years | Disease                    | Group | Stage (only tumor patients) |
|---------------|------|--------|-----------------|------------|----------------------------|-------|-----------------------------|
| 969           | 66   | female | Present         | 0.6        | HC                         | HC    |                             |
| 970           | 64   | male   | Past            | 0.5        | HC                         | HC    |                             |
| 971           | 79   | male   | Past            | 0.5        | HC                         | HC    |                             |
| 972           | 68   | male   | Past            | 0.5        | HC                         | HC    |                             |
| 973           | 59   | male   | Past            | 0.5        | COPD                       | NTLD  |                             |
| 974           | 62   | male   | Past            | 0.45       | HC                         | HC    |                             |
| 975           | 63   | male   | Past            | 0.4        | HC                         | HC    |                             |
| 976           | 68   | male   | Past            | 0.4        | COPD                       | NTLD  |                             |
| 977           | 71   | male   | Past            | 0.35       | COPD                       | NTLD  |                             |
| 978           | 70   | male   | Past            | 0.3        | HC                         | HC    |                             |
| 979           | 70   | female | Past            | 0.25       | COPD                       | NTLD  |                             |
| 980           | 69   | female | Past            | 0.2        | COPD                       | NTLD  |                             |
| 981           | 60   | female | Past            | 0.15       | COPD                       | NTLD  |                             |
| 982           | 68   | female | Past            | 0.1        | HC                         | HC    |                             |
| 983           | 69   | female | Past            | 0.1        | HC                         | HC    |                             |
| 984           | 75   | male   | Past            | 0.1        | COPD                       | NTLD  |                             |
| 985           | 75   | male   | Past            | 0.1        | COPD                       | NTLD  |                             |
| 986           | 77   | female | Past            | 0.05       | COPD                       | NTLD  |                             |
| 987           | 73   | male   | Past            | 0.05       | COPD                       | NTLD  |                             |
| 988           | 62   | male   | Past            | 0.01       | HC                         | HC    |                             |
| 989           | 61   | female | Past            | 0.0075     | HC                         | HC    |                             |
| 990           | 41.8 | male   | Never           | 0          | other Lung Carcinoma       | LCa   | 1                           |
| 991           | 77.4 | male   | Never           | 0          | Non-Small Cell Lung Cancer | LCa   | 2                           |
| 992           | 47.2 | male   | Never           | 0          | Non-Small Cell Lung Cancer | LCa   | 3                           |
| 993           | 82.1 | male   | Never           | 0          | Non-Small Cell Lung Cancer | LCa   | 3                           |
| 994           | 81.3 | female | Never           | 0          | Non-Small Cell Lung Cancer | LCa   | 2                           |
| 995           | 71   | female | Never           | 0          | Non-Small Cell Lung Cancer | LCa   | 1                           |
| 996           | 63.2 | male   | Never           | 0          | Non-Small Cell Lung Cancer | LCa   | 2                           |
| 997           | 75.4 | male   | Never           | 0          | Non-Small Cell Lung Cancer | LCa   | 2                           |
| 998           | 58.4 | male   | Never           | 0          | Non-Small Cell Lung Cancer | LCa   | 2                           |
| 999           | 75   | male   | Never           | 0          | Non-Small Cell Lung Cancer | LCa   | 2                           |
| 1000          | 57.2 | female | Never           | 0          | Non-Small Cell Lung Cancer | LCa   | 3                           |



| Sample number | Age  | Gender | Smoking history | Pack years | Disease                    | Group | Stage (only tumor patients) |
|---------------|------|--------|-----------------|------------|----------------------------|-------|-----------------------------|
| 1001          | 71.4 | female | Never           | 0          | Non-Small Cell Lung Cancer | LCa   | 4                           |
| 1002          | 83.9 | female | Never           | 0          | Non-Small Cell Lung Cancer | LCa   | 3                           |
| 1003          | 62.7 | male   | Never           | 0          | Non-Small Cell Lung Cancer | LCa   | 3                           |
| 1004          | 73   | male   | Never           | 0          | Heart Disease              | OD    |                             |
| 1005          | 77   | male   | Never           | 0          | Heart Disease              | OD    |                             |
| 1006          | 57   | male   | Never           | 0          | Heart Disease              | OD    |                             |
| 1007          | 76   | male   | Never           | 0          | Heart Disease              | OD    |                             |
| 1008          | 83   | female | Never           | 0          | Heart Disease              | OD    |                             |
| 1009          | 63   | female | Never           | 0          | Heart Disease              | OD    |                             |
| 1010          | 77   | female | Never           | 0          | Heart Disease              | OD    |                             |
| 1011          | 76   | male   | Never           | 0          | Heart Disease              | OD    |                             |
| 1012          | 70   | female | Never           | 0          | Heart Disease              | OD    |                             |
| 1013          | 57   | male   | Never           | 0          | Heart Disease              | OD    |                             |
| 1014          | 87   | male   | Never           | 0          | Heart Disease              | OD    |                             |
| 1015          | 81   | female | Never           | 0          | Heart Disease              | OD    |                             |
| 1016          | 84   | female | Never           | 0          | Heart Disease              | OD    |                             |
| 1017          | 58   | male   | Never           | 0          | Heart Disease              | OD    |                             |
| 1018          | 92   | male   | Never           | 0          | Heart Disease              | OD    |                             |
| 1019          | 74   | female | Never           | 0          | Heart Disease              | OD    |                             |
| 1020          | 56   | male   | Never           | 0          | Heart Disease              | OD    |                             |
| 1021          | 81   | female | Never           | 0          | Heart Disease              | OD    |                             |
| 1022          | 62   | male   | Never           | 0          | Heart Disease              | OD    |                             |
| 1023          | 58   | male   | Never           | 0          | Heart Disease              | OD    |                             |
| 1024          | 74   | male   | Never           | 0          | Heart Disease              | OD    |                             |
| 1025          | 90   | female | Never           | 0          | Heart Disease              | OD    |                             |
| 1026          | 75   | male   | Never           | 0          | Heart Disease              | OD    |                             |
| 1027          | 50   | male   | Never           | 0          | Heart Disease              | OD    |                             |
| 1028          | 47   | male   | Never           | 0          | Heart Disease              | OD    |                             |
| 1029          | 47   | male   | Never           | 0          | Heart Disease              | OD    |                             |
| 1030          | 57   | male   | Never           | 0          | Heart Disease              | OD    |                             |
| 1031          | 57   | male   | Never           | 0          | Heart Disease              | OD    |                             |
| 1032          | 75   | female | Never           | 0          | Heart Disease              | OD    |                             |
| 1033          | 72   | male   | Never           | 0          | Heart Disease              | OD    |                             |
| 1034          | 57   | male   | Never           | 0          | Heart Disease              | OD    |                             |
| 1035          | 43   | male   | Never           | 0          | Heart Disease              | OD    |                             |
| 1036          | 61   | male   | Never           | 0          | Heart Disease              | OD    |                             |

| <b>Sample number</b> | <b>Age</b> | <b>Gender</b> | <b>Smoking history</b> | <b>Pack years</b> | <b>Disease</b> | <b>Group</b> | <b>Stage (only tumor patients)</b> |
|----------------------|------------|---------------|------------------------|-------------------|----------------|--------------|------------------------------------|
| 1037                 | 61         | male          | Never                  | 0                 | Heart Disease  | OD           |                                    |
| 1038                 | 54         | male          | Never                  | 0                 | Heart Disease  | OD           |                                    |
| 1039                 | 80         | female        | Never                  | 0                 | Heart Disease  | OD           |                                    |
| 1040                 | 65         | male          | Never                  | 0                 | Heart Disease  | OD           |                                    |
| 1041                 | 75         | male          | Never                  | 0                 | Heart Disease  | OD           |                                    |
| 1042                 | 78         | male          | Never                  | 0                 | Heart Disease  | OD           |                                    |
| 1043                 | 79         | female        | Never                  | 0                 | Heart Disease  | OD           |                                    |
| 1044                 | 58         | male          | Never                  | 0                 | Heart Disease  | OD           |                                    |
| 1045                 | 77         | male          | Never                  | 0                 | Heart Disease  | OD           |                                    |
| 1046                 | 70         | female        | Never                  | 0                 | Heart Disease  | OD           |                                    |
| 1047                 | 71         | male          | Never                  | 0                 | Heart Disease  | OD           |                                    |
| 1048                 | 79         | male          | Never                  | 0                 | Heart Disease  | OD           |                                    |
| 1049                 | 64         | female        | Never                  | 0                 | Heart Disease  | OD           |                                    |
| 1050                 | 71         | male          | Never                  | 0                 | Heart Disease  | OD           |                                    |
| 1051                 | 89         | female        | Never                  | 0                 | Heart Disease  | OD           |                                    |
| 1052                 | 74         | male          | Never                  | 0                 | Heart Disease  | OD           |                                    |
| 1053                 | 55         | male          | Never                  | 0                 | Heart Disease  | OD           |                                    |
| 1054                 | 72         | female        | Never                  | 0                 | Heart Disease  | OD           |                                    |
| 1055                 | 54         | male          | Never                  | 0                 | Heart Disease  | OD           |                                    |
| 1056                 | 76         | female        | Never                  | 0                 | Heart Disease  | OD           |                                    |
| 1057                 | 65         | female        | Never                  | 0                 | Heart Disease  | OD           |                                    |
| 1058                 | 63         | male          | Never                  | 0                 | Heart Disease  | OD           |                                    |
| 1059                 | 79         | male          | Never                  | 0                 | Heart Disease  | OD           |                                    |
| 1060                 | 86         | female        | Never                  | 0                 | Heart Disease  | OD           |                                    |
| 1061                 | 74         | male          | Never                  | 0                 | Heart Disease  | OD           |                                    |
| 1062                 | 58         | male          | Never                  | 0                 | Heart Disease  | OD           |                                    |
| 1063                 | 86         | male          | Never                  | 0                 | Heart Disease  | OD           |                                    |
| 1064                 | 81         | female        | Never                  | 0                 | Heart Disease  | OD           |                                    |
| 1065                 | 81         | female        | Never                  | 0                 | Heart Disease  | OD           |                                    |
| 1066                 | 70         | male          | Never                  | 0                 | Heart Disease  | OD           |                                    |
| 1067                 | 83         | female        | Never                  | 0                 | Heart Disease  | OD           |                                    |
| 1068                 | 70         | female        | Never                  | 0                 | Heart Disease  | OD           |                                    |
| 1069                 | 91         | male          | Never                  | 0                 | Heart Disease  | OD           |                                    |
| 1070                 | 83         | male          | Never                  | 0                 | Heart Disease  | OD           |                                    |
| 1071                 | 81         | male          | Never                  | 0                 | Heart Disease  | OD           |                                    |
| 1072                 | 74         | male          | Never                  | 0                 | Heart Disease  | OD           |                                    |
| 1073                 | 67         | male          | Never                  | 0                 | Heart Disease  | OD           |                                    |

| <b>Sample number</b> | <b>Age</b> | <b>Gender</b> | <b>Smoking history</b> | <b>Pack years</b> | <b>Disease</b> | <b>Group</b> | <b>Stage (only tumor patients)</b> |
|----------------------|------------|---------------|------------------------|-------------------|----------------|--------------|------------------------------------|
| 1074                 | 77         | female        | Never                  | 0                 | Heart Disease  | OD           |                                    |
| 1075                 | 85         | female        | Never                  | 0                 | Heart Disease  | OD           |                                    |
| 1076                 | 80         | female        | Never                  | 0                 | Heart Disease  | OD           |                                    |
| 1077                 | 79         | female        | Never                  | 0                 | Heart Disease  | OD           |                                    |
| 1078                 | 70         | male          | Never                  | 0                 | Heart Disease  | OD           |                                    |
| 1079                 | 72         | female        | Never                  | 0                 | Heart Disease  | OD           |                                    |
| 1080                 | 81         | female        | Never                  | 0                 | Heart Disease  | OD           |                                    |
| 1081                 | 78         | male          | Never                  | 0                 | Heart Disease  | OD           |                                    |
| 1082                 | 69         | male          | Never                  | 0                 | Heart Disease  | OD           |                                    |
| 1083                 | 79         | female        | Never                  | 0                 | Heart Disease  | OD           |                                    |
| 1084                 | 74         | male          | Never                  | 0                 | Heart Disease  | OD           |                                    |
| 1085                 | 73         | male          | Never                  | 0                 | Heart Disease  | OD           |                                    |
| 1086                 | 79         | female        | Never                  | 0                 | Heart Disease  | OD           |                                    |
| 1087                 | 84         | female        | Never                  | 0                 | Heart Disease  | OD           |                                    |
| 1088                 | 83         | male          | Never                  | 0                 | Heart Disease  | OD           |                                    |
| 1089                 | 97         | male          | Never                  | 0                 | Heart Disease  | OD           |                                    |
| 1090                 | 78         | male          | Never                  | 0                 | Heart Disease  | OD           |                                    |
| 1091                 | 66         | male          | Never                  | 0                 | Heart Disease  | OD           |                                    |
| 1092                 | 61         | male          | Never                  | 0                 | Heart Disease  | OD           |                                    |
| 1093                 | 68         | male          | Never                  | 0                 | Heart Disease  | OD           |                                    |
| 1094                 | 68         | male          | Never                  | 0                 | Heart Disease  | OD           |                                    |
| 1095                 | 88         | female        | Never                  | 0                 | Heart Disease  | OD           |                                    |
| 1096                 | 69         | male          | Never                  | 0                 | Heart Disease  | OD           |                                    |
| 1097                 | 77         | male          | Never                  | 0                 | Heart Disease  | OD           |                                    |
| 1098                 | 84         | male          | Never                  | 0                 | Heart Disease  | OD           |                                    |
| 1099                 | 83         | male          | Never                  | 0                 | Heart Disease  | OD           |                                    |
| 1100                 | 56         | male          | Never                  | 0                 | Heart Disease  | OD           |                                    |
| 1101                 | 42         | male          | Never                  | 0                 | Heart Disease  | OD           |                                    |
| 1102                 | 71         | male          | Never                  | 0                 | Heart Disease  | OD           |                                    |
| 1103                 | 79         | female        | Never                  | 0                 | Heart Disease  | OD           |                                    |
| 1104                 | 47         | male          | Never                  | 0                 | Heart Disease  | OD           |                                    |
| 1105                 | 84         | male          | Never                  | 0                 | Heart Disease  | OD           |                                    |
| 1106                 | 44         | female        | Never                  | 0                 | Heart Disease  | OD           |                                    |
| 1107                 | 58         | male          | Never                  | 0                 | Heart Disease  | OD           |                                    |
| 1108                 | 71         | male          | Never                  | 0                 | Heart Disease  | OD           |                                    |
| 1109                 | 63         | female        | Never                  | 0                 | Heart Disease  | OD           |                                    |
| 1110                 | 79         | male          | Never                  | 0                 | Heart Disease  | OD           |                                    |

| Sample number | Age | Gender | Smoking history | Pack years | Disease       | Group | Stage (only tumor patients) |
|---------------|-----|--------|-----------------|------------|---------------|-------|-----------------------------|
| 1111          | 79  | male   | Never           | 0          | Heart Disease | OD    |                             |
| 1112          | 66  | female | Never           | 0          | Heart Disease | OD    |                             |
| 1113          | 58  | male   | Never           | 0          | Heart Disease | OD    |                             |
| 1114          | 77  | male   | Never           | 0          | Heart Disease | OD    |                             |
| 1115          | 76  | male   | Never           | 0          | Heart Disease | OD    |                             |
| 1116          | 66  | male   | Never           | 0          | Heart Disease | OD    |                             |
| 1117          | 70  | female | Never           | 0          | Heart Disease | OD    |                             |
| 1118          | 67  | male   | Never           | 0          | Heart Disease | OD    |                             |
| 1119          | 77  | female | Never           | 0          | Heart Disease | OD    |                             |
| 1120          | 81  | female | Never           | 0          | Heart Disease | OD    |                             |
| 1121          | 83  | male   | Never           | 0          | Heart Disease | OD    |                             |
| 1122          | 56  | male   | Never           | 0          | Heart Disease | OD    |                             |
| 1123          | 91  | male   | Never           | 0          | Heart Disease | OD    |                             |
| 1124          | 77  | male   | Never           | 0          | Heart Disease | OD    |                             |
| 1125          | 81  | female | Never           | 0          | Heart Disease | OD    |                             |
| 1126          | 70  | male   | Never           | 0          | Heart Disease | OD    |                             |
| 1127          | 77  | male   | Never           | 0          | Heart Disease | OD    |                             |
| 1128          | 71  | male   | Never           | 0          | Heart Disease | OD    |                             |
| 1129          | 84  | male   | Never           | 0          | Heart Disease | OD    |                             |
| 1130          | 83  | male   | Never           | 0          | Heart Disease | OD    |                             |
| 1131          | 75  | male   | Never           | 0          | Heart Disease | OD    |                             |
| 1132          | 76  | female | Never           | 0          | Heart Disease | OD    |                             |
| 1133          | 61  | female | Never           | 0          | Heart Disease | OD    |                             |
| 1134          | 78  | female | Never           | 0          | Heart Disease | OD    |                             |
| 1135          | 58  | male   | Never           | 0          | Heart Disease | OD    |                             |
| 1136          | 80  | male   | Never           | 0          | Heart Disease | OD    |                             |
| 1137          | 65  | male   | Never           | 0          | Heart Disease | OD    |                             |
| 1138          | 65  | male   | Never           | 0          | Heart Disease | OD    |                             |
| 1139          | 78  | male   | Never           | 0          | Heart Disease | OD    |                             |
| 1140          | 66  | male   | Never           | 0          | Heart Disease | OD    |                             |
| 1141          | 72  | female | Never           | 0          | Heart Disease | OD    |                             |
| 1142          | 57  | male   | Never           | 0          | Heart Disease | OD    |                             |
| 1143          | 79  | male   | Never           | 0          | Heart Disease | OD    |                             |
| 1144          | 63  | male   | Never           | 0          | Heart Disease | OD    |                             |
| 1145          | 81  | male   | Never           | 0          | Heart Disease | OD    |                             |
| 1146          | 70  | female | Never           | 0          | Heart Disease | OD    |                             |
| 1147          | 74  | female | Never           | 0          | Heart Disease | OD    |                             |

| <b>Sample number</b> | <b>Age</b> | <b>Gender</b> | <b>Smoking history</b> | <b>Pack years</b> | <b>Disease</b> | <b>Group</b> | <b>Stage (only tumor patients)</b> |
|----------------------|------------|---------------|------------------------|-------------------|----------------|--------------|------------------------------------|
| 1148                 | 81         | male          | Never                  | 0                 | Heart Disease  | OD           |                                    |
| 1149                 | 72         | male          | Never                  | 0                 | Heart Disease  | OD           |                                    |
| 1150                 | 91         | female        | Never                  | 0                 | Heart Disease  | OD           |                                    |
| 1151                 | 59         | male          | Never                  | 0                 | Heart Disease  | OD           |                                    |
| 1152                 | 67         | female        | Never                  | 0                 | Heart Disease  | OD           |                                    |
| 1153                 | 82         | male          | Never                  | 0                 | Heart Disease  | OD           |                                    |
| 1154                 | 80         | male          | Never                  | 0                 | Heart Disease  | OD           |                                    |
| 1155                 | 64         | male          | Never                  | 0                 | Heart Disease  | OD           |                                    |
| 1156                 | 77         | male          | Never                  | 0                 | Heart Disease  | OD           |                                    |
| 1157                 | 83         | male          | Never                  | 0                 | Heart Disease  | OD           |                                    |
| 1158                 | 67         | female        | Never                  | 0                 | Heart Disease  | OD           |                                    |
| 1159                 | 79         | male          | Never                  | 0                 | Heart Disease  | OD           |                                    |
| 1160                 | 45         | male          | Never                  | 0                 | Heart Disease  | OD           |                                    |
| 1161                 | 82         | female        | Never                  | 0                 | Heart Disease  | OD           |                                    |
| 1162                 | 64         | male          | Never                  | 0                 | Heart Disease  | OD           |                                    |
| 1163                 | 64         | male          | Never                  | 0                 | Heart Disease  | OD           |                                    |
| 1164                 | 76         | male          | Never                  | 0                 | Heart Disease  | OD           |                                    |
| 1165                 | 59         | male          | Never                  | 0                 | Heart Disease  | OD           |                                    |
| 1166                 | 74         | female        | Never                  | 0                 | Heart Disease  | OD           |                                    |
| 1167                 | 54         | male          | Never                  | 0                 | Heart Disease  | OD           |                                    |
| 1168                 | 85         | female        | Never                  | 0                 | Heart Disease  | OD           |                                    |
| 1169                 | 43         | male          | Never                  | 0                 | Heart Disease  | OD           |                                    |
| 1170                 | 79         | male          | Never                  | 0                 | Heart Disease  | OD           |                                    |
| 1171                 | 74         | female        | Never                  | 0                 | Heart Disease  | OD           |                                    |
| 1172                 | 64         | male          | Never                  | 0                 | Heart Disease  | OD           |                                    |
| 1173                 | 89         | male          | Never                  | 0                 | Heart Disease  | OD           |                                    |
| 1174                 | 75         | male          | Never                  | 0                 | Heart Disease  | OD           |                                    |
| 1175                 | 55         | female        | Never                  | 0                 | Heart Disease  | OD           |                                    |
| 1176                 | 60         | male          | Never                  | 0                 | Heart Disease  | OD           |                                    |
| 1177                 | 78         | male          | Never                  | 0                 | Heart Disease  | OD           |                                    |
| 1178                 | 67         | male          | Never                  | 0                 | Heart Disease  | OD           |                                    |
| 1179                 | 85         | female        | Never                  | 0                 | Heart Disease  | OD           |                                    |
| 1180                 | 73         | female        | Never                  | 0                 | Heart Disease  | OD           |                                    |
| 1181                 | 71         | male          | Never                  | 0                 | Heart Disease  | OD           |                                    |
| 1182                 | 77         | male          | Never                  | 0                 | Heart Disease  | OD           |                                    |
| 1183                 | 57         | male          | Never                  | 0                 | Heart Disease  | OD           |                                    |
| 1184                 | 51         | male          | Never                  | 0                 | Heart Disease  | OD           |                                    |

| <b>Sample number</b> | <b>Age</b> | <b>Gender</b> | <b>Smoking history</b> | <b>Pack years</b> | <b>Disease</b> | <b>Group</b> | <b>Stage (only tumor patients)</b> |
|----------------------|------------|---------------|------------------------|-------------------|----------------|--------------|------------------------------------|
| 1185                 | 79         | female        | Never                  | 0                 | Heart Disease  | OD           |                                    |
| 1186                 | 88         | female        | Never                  | 0                 | Heart Disease  | OD           |                                    |
| 1187                 | 73         | male          | Never                  | 0                 | Heart Disease  | OD           |                                    |
| 1188                 | 78         | male          | Never                  | 0                 | Heart Disease  | OD           |                                    |
| 1189                 | 72         | male          | Never                  | 0                 | Heart Disease  | OD           |                                    |
| 1190                 | 78         | male          | Never                  | 0                 | Heart Disease  | OD           |                                    |
| 1191                 | 47         | female        | Never                  | 0                 | Heart Disease  | OD           |                                    |
| 1192                 | 83         | female        | Never                  | 0                 | Heart Disease  | OD           |                                    |
| 1193                 | 78         | male          | Never                  | 0                 | Heart Disease  | OD           |                                    |
| 1194                 | 70         | female        | Never                  | 0                 | Heart Disease  | OD           |                                    |
| 1195                 | 70         | male          | Never                  | 0                 | Heart Disease  | OD           |                                    |
| 1196                 | 87         | male          | Never                  | 0                 | Heart Disease  | OD           |                                    |
| 1197                 | 77         | male          | Never                  | 0                 | Heart Disease  | OD           |                                    |
| 1198                 | 70         | male          | Never                  | 0                 | Heart Disease  | OD           |                                    |
| 1199                 | 65         | female        | Never                  | 0                 | Heart Disease  | OD           |                                    |
| 1200                 | 78         | male          | Never                  | 0                 | Heart Disease  | OD           |                                    |
| 1201                 | 76         | male          | Never                  | 0                 | Heart Disease  | OD           |                                    |
| 1202                 | 81         | male          | Never                  | 0                 | Heart Disease  | OD           |                                    |
| 1203                 | 81         | male          | Never                  | 0                 | Heart Disease  | OD           |                                    |
| 1204                 | 67         | male          | Never                  | 0                 | Heart Disease  | OD           |                                    |
| 1205                 | 60         | male          | Never                  | 0                 | Heart Disease  | OD           |                                    |
| 1206                 | 59         | male          | Never                  | 0                 | Heart Disease  | OD           |                                    |
| 1207                 | 82         | female        | Never                  | 0                 | Heart Disease  | OD           |                                    |
| 1208                 | 77         | male          | Never                  | 0                 | Heart Disease  | OD           |                                    |
| 1209                 | 81         | female        | Never                  | 0                 | Heart Disease  | OD           |                                    |
| 1210                 | 64         | male          | Never                  | 0                 | Heart Disease  | OD           |                                    |
| 1211                 | 84         | male          | Never                  | 0                 | Heart Disease  | OD           |                                    |
| 1212                 | 78         | male          | Never                  | 0                 | Heart Disease  | OD           |                                    |
| 1213                 | 81         | male          | Never                  | 0                 | Heart Disease  | OD           |                                    |
| 1214                 | 56         | male          | Never                  | 0                 | Heart Disease  | OD           |                                    |
| 1215                 | 68         | male          | Never                  | 0                 | Heart Disease  | OD           |                                    |
| 1216                 | 67         | male          | Never                  | 0                 | Heart Disease  | OD           |                                    |
| 1217                 | 55         | female        | Never                  | 0                 | Heart Disease  | OD           |                                    |
| 1218                 | 73         | male          | Never                  | 0                 | Heart Disease  | OD           |                                    |
| 1219                 | 78         | female        | Never                  | 0                 | Heart Disease  | OD           |                                    |
| 1220                 | 51         | male          | Never                  | 0                 | Heart Disease  | OD           |                                    |
| 1221                 | 69         | male          | Never                  | 0                 | Heart Disease  | OD           |                                    |

| <b>Sample number</b> | <b>Age</b> | <b>Gender</b> | <b>Smoking history</b> | <b>Pack years</b> | <b>Disease</b> | <b>Group</b> | <b>Stage (only tumor patients)</b> |
|----------------------|------------|---------------|------------------------|-------------------|----------------|--------------|------------------------------------|
| 1222                 | 61         | male          | Never                  | 0                 | Heart Disease  | OD           |                                    |
| 1223                 | 86         | male          | Never                  | 0                 | Heart Disease  | OD           |                                    |
| 1224                 | 62         | male          | Never                  | 0                 | Heart Disease  | OD           |                                    |
| 1225                 | 75         | male          | Never                  | 0                 | Heart Disease  | OD           |                                    |
| 1226                 | 81         | male          | Never                  | 0                 | Heart Disease  | OD           |                                    |
| 1227                 | 66         | male          | Never                  | 0                 | Heart Disease  | OD           |                                    |
| 1228                 | 60         | male          | Never                  | 0                 | Heart Disease  | OD           |                                    |
| 1229                 | 77         | male          | Never                  | 0                 | Heart Disease  | OD           |                                    |
| 1230                 | 86         | female        | Never                  | 0                 | Heart Disease  | OD           |                                    |
| 1231                 | 86         | female        | Never                  | 0                 | Heart Disease  | OD           |                                    |
| 1232                 | 75         | male          | Never                  | 0                 | Heart Disease  | OD           |                                    |
| 1233                 | 53         | male          | Never                  | 0                 | Heart Disease  | OD           |                                    |
| 1234                 | 59         | female        | Never                  | 0                 | Heart Disease  | OD           |                                    |
| 1235                 | 56         | male          | Never                  | 0                 | Heart Disease  | OD           |                                    |
| 1236                 | 69         | female        | Never                  | 0                 | Heart Disease  | OD           |                                    |
| 1237                 | 50         | male          | Never                  | 0                 | Heart Disease  | OD           |                                    |
| 1238                 | 69         | male          | Never                  | 0                 | Heart Disease  | OD           |                                    |
| 1239                 | 60         | male          | Never                  | 0                 | Heart Disease  | OD           |                                    |
| 1240                 | 70         | male          | Never                  | 0                 | Heart Disease  | OD           |                                    |
| 1241                 | 66         | female        | Never                  | 0                 | Heart Disease  | OD           |                                    |
| 1242                 | 68         | female        | Never                  | 0                 | Heart Disease  | OD           |                                    |
| 1243                 | 73         | male          | Never                  | 0                 | Heart Disease  | OD           |                                    |
| 1244                 | 60         | female        | Never                  | 0                 | Heart Disease  | OD           |                                    |
| 1245                 | 76         | male          | Never                  | 0                 | Heart Disease  | OD           |                                    |
| 1246                 | 75         | male          | Never                  | 0                 | Heart Disease  | OD           |                                    |
| 1247                 | 74         | female        | Never                  | 0                 | Heart Disease  | OD           |                                    |
| 1248                 | 52         | female        | Never                  | 0                 | Heart Disease  | OD           |                                    |
| 1249                 | 83         | female        | Never                  | 0                 | Heart Disease  | OD           |                                    |
| 1250                 | 69         | male          | Never                  | 0                 | Heart Disease  | OD           |                                    |
| 1251                 | 58         | male          | Never                  | 0                 | Heart Disease  | OD           |                                    |
| 1252                 | 50         | male          | Never                  | 0                 | Heart Disease  | OD           |                                    |
| 1253                 | 68         | male          | Never                  | 0                 | Heart Disease  | OD           |                                    |
| 1254                 | 57         | male          | Never                  | 0                 | Heart Disease  | OD           |                                    |
| 1255                 | 45         | male          | Never                  | 0                 | Heart Disease  | OD           |                                    |
| 1256                 | 57         | male          | Never                  | 0                 | Heart Disease  | OD           |                                    |
| 1257                 | 64         | male          | Never                  | 0                 | Heart Disease  | OD           |                                    |
| 1258                 | 85         | female        | Never                  | 0                 | Heart Disease  | OD           |                                    |

| Sample number | Age  | Gender | Smoking history | Pack years | Disease                    | Group | Stage (only tumor patients) |
|---------------|------|--------|-----------------|------------|----------------------------|-------|-----------------------------|
| 1259          | 70   | male   | Never           | 0          | Heart Disease              | OD    |                             |
| 1260          | 73   | male   | Never           | 0          | Heart Disease              | OD    |                             |
| 1261          | 63   | female | Never           | 0          | Heart Disease              | OD    |                             |
| 1262          | 25   | female | Never           | 0          | Heart Disease              | OD    |                             |
| 1263          | 57   | male   | Never           | 0          | Heart Disease              | OD    |                             |
| 1264          | 71   | male   | Never           | 0          | Heart Disease              | OD    |                             |
| 1265          | 88   | female | Never           | 0          | Heart Disease              | OD    |                             |
| 1266          | 73   | male   | Never           | 0          | Heart Disease              | OD    |                             |
| 1267          | 78   | female | Never           | 0          | Heart Disease              | OD    |                             |
| 1268          | 64   | male   | Never           | 0          | Heart Disease              | OD    |                             |
| 1269          | 80   | male   | Never           | 0          | Heart Disease              | OD    |                             |
| 1270          | 50   | male   | Never           | 0          | Heart Disease              | OD    |                             |
| 1271          | 64   | male   | Never           | 0          | Heart Disease              | OD    |                             |
| 1272          | 64   | male   | Never           | 0          | Heart Disease              | OD    |                             |
| 1273          | 88   | male   | Never           | 0          | Heart Disease              | OD    |                             |
| 1274          | 84   | male   | Never           | 0          | Heart Disease              | OD    |                             |
| 1275          | 64   | female | Never           | 0          | Heart Disease              | OD    |                             |
| 1276          | 84   | female | Never           | 0          | Heart Disease              | OD    |                             |
| 1277          | 61   | male   | Never           | 0          | Heart Disease              | OD    |                             |
| 1278          | 88   | male   | Never           | 0          | Heart Disease              | OD    |                             |
| 1279          | 76   | male   | Never           | 0          | Heart Disease              | OD    |                             |
| 1280          | 60   | male   | Never           | 0          | Heart Disease              | OD    |                             |
| 1281          | 73   | male   | Never           | 0          | Heart Disease              | OD    |                             |
| 1282          | 62.7 | female | Never           | 0          | NTLD                       | NTLD  |                             |
| 1283          | 90.1 | male   | Never           | 0          | NTLD                       | NTLD  |                             |
| 1284          | 82.3 | male   | Never           | 0          | NTLD                       | NTLD  |                             |
| 1285          | 82.1 | female | Never           | 0          | NTLD                       | NTLD  |                             |
| 1286          | 54.1 | female | Never           | 0          | other Lung Carcinoma       | LCa   |                             |
| 1287          | 80.3 | male   | Never           | 0          | NTLD                       | NTLD  |                             |
| 1288          | 57.2 | female | Never           | 0          | Non-Small Cell Lung Cancer | LCa   | 1                           |
| 1289          | 61.4 | male   | Never           | 0          | Non-Small Cell Lung Cancer | LCa   | 1                           |
| 1290          | 79.5 | female | Never           | 0          | Non-Small Cell Lung Cancer | LCa   | 2                           |
| 1291          | 61.1 | female | Never           | 0          | Non-Small Cell Lung Cancer | LCa   | 2                           |
| 1292          | 74.2 | male   | Never           | 0          | Non-Small Cell Lung Cancer | LCa   | 1                           |



| Sample number | Age  | Gender | Smoking history | Pack years | Disease                    | Group | Stage (only tumor patients) |
|---------------|------|--------|-----------------|------------|----------------------------|-------|-----------------------------|
| 1293          | 71.6 | male   | Never           | 0          | Non-Small Cell Lung Cancer | LCa   | 1                           |
| 1294          | 74.6 | male   | Never           | 0          | Non-Small Cell Lung Cancer | LCa   | 2                           |
| 1295          | 55.1 | female | Never           | 0          | Non-Small Cell Lung Cancer | LCa   | 1                           |
| 1296          | 71.5 | female | Never           | 0          | Non-Small Cell Lung Cancer | LCa   | 1                           |
| 1297          | 71.7 | female | Never           | 0          | Non-Small Cell Lung Cancer | LCa   | 3                           |
| 1298          | 75.3 | male   | Never           | 0          | Non-Small Cell Lung Cancer | LCa   | 2                           |
| 1299          | 71   | male   | Never           | 0          | Non-Small Cell Lung Cancer | LCa   | 3                           |
| 1300          | 41.6 | female | Never           | 0          | Non-Small Cell Lung Cancer | LCa   | 2                           |
| 1301          | 47.2 | male   | Never           | 0          | Non-Small Cell Lung Cancer | LCa   | 3                           |
| 1302          | 62.1 | female | Never           | 0          | Non-Small Cell Lung Cancer | LCa   | 3                           |
| 1303          | 84.1 | female | Never           | 0          | Non-Small Cell Lung Cancer | LCa   | 2                           |
| 1304          | 26.7 | female | Never           | 0          | HC                         | HC    |                             |
| 1305          | 26.9 | female | Never           | 0          | HC                         | HC    |                             |
| 1306          | 27.2 | female | Never           | 0          | HC                         | HC    |                             |
| 1307          | 23.1 | female | Never           | 0          | HC                         | HC    |                             |
| 1308          | 23.4 | female | Never           | 0          | HC                         | HC    |                             |
| 1309          | 23.6 | female | Never           | 0          | HC                         | HC    |                             |
| 1310          | 23.9 | female | Never           | 0          | HC                         | HC    |                             |
| 1311          | 24.1 | female | Never           | 0          | HC                         | HC    |                             |
| 1312          | 28.8 | female | Never           | 0          | HC                         | HC    |                             |
| 1313          | 29   | female | Never           | 0          | HC                         | HC    |                             |
| 1314          | 29.2 | female | Never           | 0          | HC                         | HC    |                             |
| 1315          | 29.5 | female | Never           | 0          | HC                         | HC    |                             |
| 1316          | 21.1 | male   | Never           | 0          | HC                         | HC    |                             |
| 1317          | 21.4 | male   | Never           | 0          | HC                         | HC    |                             |
| 1318          | 21.6 | male   | Never           | 0          | HC                         | HC    |                             |
| 1319          | 22.1 | male   | Never           | 0          | HC                         | HC    |                             |
| 1320          | 18.8 | female | Never           | 0          | HC                         | HC    |                             |
| 1321          | 19   | female | Never           | 0          | HC                         | HC    |                             |
| 1322          | 19.3 | female | Never           | 0          | HC                         | HC    |                             |
| 1323          | 27.6 | female | Never           | 0          | HC                         | HC    |                             |
| 1324          | 27.8 | female | Never           | 0          | HC                         | HC    |                             |

| Sample number | Age  | Gender | Smoking history | Pack years | Disease | Group | Stage (only tumor patients) |
|---------------|------|--------|-----------------|------------|---------|-------|-----------------------------|
| 1325          | 28.1 | female | Never           | 0          | HC      | HC    |                             |
| 1326          | 33.3 | female | Never           | 0          | HC      | HC    |                             |
| 1327          | 33.9 | female | Never           | 0          | HC      | HC    |                             |
| 1328          | 34.1 | female | Never           | 0          | HC      | HC    |                             |
| 1329          | 26.8 | female | Never           | 0          | HC      | HC    |                             |
| 1330          | 27.1 | female | Never           | 0          | HC      | HC    |                             |
| 1331          | 27.4 | female | Never           | 0          | HC      | HC    |                             |
| 1332          | 27.6 | female | Never           | 0          | HC      | HC    |                             |
| 1333          | 22.7 | male   | Never           | 0          | HC      | HC    |                             |
| 1334          | 22.9 | male   | Never           | 0          | HC      | HC    |                             |
| 1335          | 23.2 | male   | Never           | 0          | HC      | HC    |                             |
| 1336          | 23.5 | male   | Never           | 0          | HC      | HC    |                             |
| 1337          | 26.6 | male   | Never           | 0          | HC      | HC    |                             |
| 1338          | 26.8 | male   | Never           | 0          | HC      | HC    |                             |
| 1339          | 27.1 | male   | Never           | 0          | HC      | HC    |                             |
| 1340          | 27.3 | male   | Never           | 0          | HC      | HC    |                             |
| 1341          | 27.6 | male   | Never           | 0          | HC      | HC    |                             |
| 1342          | 25   | female | Never           | 0          | HC      | HC    |                             |
| 1343          | 25.3 | female | Never           | 0          | HC      | HC    |                             |
| 1344          | 25.6 | female | Never           | 0          | HC      | HC    |                             |
| 1345          | 25.8 | female | Never           | 0          | HC      | HC    |                             |
| 1346          | 22.9 | male   | Never           | 0          | HC      | HC    |                             |
| 1347          | 23.2 | male   | Never           | 0          | HC      | HC    |                             |
| 1348          | 23.4 | male   | Never           | 0          | HC      | HC    |                             |
| 1349          | 23.7 | male   | Never           | 0          | HC      | HC    |                             |
| 1350          | 23.6 | female | Never           | 0          | HC      | HC    |                             |
| 1351          | 23.9 | female | Never           | 0          | HC      | HC    |                             |
| 1352          | 24.1 | female | Never           | 0          | HC      | HC    |                             |
| 1353          | 24.4 | female | Never           | 0          | HC      | HC    |                             |
| 1354          | 23.3 | male   | Never           | 0          | HC      | HC    |                             |
| 1355          | 23.5 | male   | Never           | 0          | HC      | HC    |                             |
| 1356          | 24   | male   | Never           | 0          | HC      | HC    |                             |
| 1357          | 19.5 | female | Never           | 0          | HC      | HC    |                             |
| 1358          | 19.8 | female | Never           | 0          | HC      | HC    |                             |
| 1359          | 20   | female | Never           | 0          | HC      | HC    |                             |
| 1360          | 20.4 | female | Never           | 0          | HC      | HC    |                             |
| 1361          | 25.4 | female | Never           | 0          | HC      | HC    |                             |

| <b>Sample number</b> | <b>Age</b> | <b>Gender</b> | <b>Smoking history</b> | <b>Pack years</b> | <b>Disease</b> | <b>Group</b> | <b>Stage (only tumor patients)</b> |
|----------------------|------------|---------------|------------------------|-------------------|----------------|--------------|------------------------------------|
| 1362                 | 24.9       | female        | Never                  | 0                 | HC             | HC           |                                    |
| 1363                 | 25.1       | female        | Never                  | 0                 | HC             | HC           |                                    |
| 1364                 | 25.7       | female        | Never                  | 0                 | HC             | HC           |                                    |
| 1365                 | 25.9       | female        | Never                  | 0                 | HC             | HC           |                                    |
| 1366                 | 21.7       | male          | Never                  | 0                 | HC             | HC           |                                    |
| 1367                 | 22         | male          | Never                  | 0                 | HC             | HC           |                                    |
| 1368                 | 22.5       | male          | Never                  | 0                 | HC             | HC           |                                    |
| 1369                 | 22.7       | male          | Never                  | 0                 | HC             | HC           |                                    |
| 1370                 | 39.5       | female        | Never                  | 0                 | HC             | HC           |                                    |
| 1371                 | 39.8       | female        | Never                  | 0                 | HC             | HC           |                                    |
| 1372                 | 40.1       | female        | Never                  | 0                 | HC             | HC           |                                    |
| 1373                 | 40.3       | female        | Never                  | 0                 | HC             | HC           |                                    |
| 1374                 | 40.6       | female        | Never                  | 0                 | HC             | HC           |                                    |
| 1375                 | 35.6       | male          | Never                  | 0                 | HC             | HC           |                                    |
| 1376                 | 35.9       | male          | Never                  | 0                 | HC             | HC           |                                    |
| 1377                 | 36.1       | male          | Never                  | 0                 | HC             | HC           |                                    |
| 1378                 | 25.8       | female        | Never                  | 0                 | HC             | HC           |                                    |
| 1379                 | 26.3       | female        | Never                  | 0                 | HC             | HC           |                                    |
| 1380                 | 26.5       | female        | Never                  | 0                 | HC             | HC           |                                    |
| 1381                 | 23.5       | male          | Never                  | 0                 | HC             | HC           |                                    |
| 1382                 | 23.8       | male          | Never                  | 0                 | HC             | HC           |                                    |
| 1383                 | 24.1       | male          | Never                  | 0                 | HC             | HC           |                                    |
| 1384                 | 24.3       | male          | Never                  | 0                 | HC             | HC           |                                    |
| 1385                 | 22.3       | female        | Never                  | 0                 | HC             | HC           |                                    |
| 1386                 | 22.4       | female        | Never                  | 0                 | HC             | HC           |                                    |
| 1387                 | 22.8       | female        | Never                  | 0                 | HC             | HC           |                                    |
| 1388                 | 23         | female        | Never                  | 0                 | HC             | HC           |                                    |
| 1389                 | 23.7       | male          | Never                  | 0                 | HC             | HC           |                                    |
| 1390                 | 24         | male          | Never                  | 0                 | HC             | HC           |                                    |
| 1391                 | 24.2       | male          | Never                  | 0                 | HC             | HC           |                                    |
| 1392                 | 40.4       | male          | Never                  | 0                 | HC             | HC           |                                    |
| 1393                 | 40.7       | male          | Never                  | 0                 | HC             | HC           |                                    |
| 1394                 | 40.9       | male          | Never                  | 0                 | HC             | HC           |                                    |
| 1395                 | 41.2       | male          | Never                  | 0                 | HC             | HC           |                                    |
| 1396                 | 23.7       | male          | Never                  | 0                 | HC             | HC           |                                    |
| 1397                 | 23.9       | male          | Never                  | 0                 | HC             | HC           |                                    |
| 1398                 | 24.4       | male          | Never                  | 0                 | HC             | HC           |                                    |

| Sample number | Age | Gender | Smoking history | Pack years | Disease | Group | Stage (only tumor patients) |
|---------------|-----|--------|-----------------|------------|---------|-------|-----------------------------|
| 1399          | 72  | male   | Never           | 0          | HC      | HC    |                             |
| 1400          | 67  | male   | Never           | 0          | HC      | HC    |                             |
| 1401          | 71  | male   | Never           | 0          | HC      | HC    |                             |
| 1402          | 68  | male   | Never           | 0          | HC      | HC    |                             |
| 1403          | 62  | female | Never           | 0          | HC      | HC    |                             |
| 1404          | 64  | female | Never           | 0          | HC      | HC    |                             |
| 1405          | 65  | female | Never           | 0          | HC      | HC    |                             |
| 1406          | 57  | male   | Never           | 0          | HC      | HC    |                             |
| 1407          | 77  | male   | Never           | 0          | HC      | HC    |                             |
| 1408          | 73  | female | Never           | 0          | HC      | HC    |                             |
| 1409          | 67  | female | Never           | 0          | HC      | HC    |                             |
| 1410          | 76  | male   | Never           | 0          | HC      | HC    |                             |
| 1411          | 68  | male   | Never           | 0          | HC      | HC    |                             |
| 1412          | 57  | male   | Never           | 0          | HC      | HC    |                             |
| 1413          | 72  | female | Never           | 0          | HC      | HC    |                             |
| 1414          | 58  | female | Never           | 0          | HC      | HC    |                             |
| 1415          | 77  | male   | Never           | 0          | HC      | HC    |                             |
| 1416          | 78  | female | Never           | 0          | HC      | HC    |                             |
| 1417          | 61  | male   | Never           | 0          | HC      | HC    |                             |
| 1418          | 67  | male   | Never           | 0          | HC      | HC    |                             |
| 1419          | 62  | female | Never           | 0          | HC      | HC    |                             |
| 1420          | 68  | female | Never           | 0          | HC      | HC    |                             |
| 1421          | 69  | male   | Never           | 0          | HC      | HC    |                             |
| 1422          | 66  | male   | Never           | 0          | HC      | HC    |                             |
| 1423          | 68  | female | Never           | 0          | HC      | HC    |                             |
| 1424          | 75  | female | Never           | 0          | HC      | HC    |                             |
| 1425          | 58  | male   | Never           | 0          | HC      | HC    |                             |
| 1426          | 75  | female | Never           | 0          | HC      | HC    |                             |
| 1427          | 62  | female | Never           | 0          | HC      | HC    |                             |
| 1428          | 68  | female | Never           | 0          | HC      | HC    |                             |
| 1429          | 73  | male   | Never           | 0          | HC      | HC    |                             |
| 1430          | 63  | male   | Never           | 0          | HC      | HC    |                             |
| 1431          | 82  | male   | Never           | 0          | HC      | HC    |                             |
| 1432          | 72  | female | Never           | 0          | HC      | HC    |                             |
| 1433          | 58  | female | Never           | 0          | HC      | HC    |                             |
| 1434          | 73  | male   | Never           | 0          | HC      | HC    |                             |
| 1435          | 67  | female | Never           | 0          | HC      | HC    |                             |

| Sample number | Age | Gender | Smoking history | Pack years | Disease | Group | Stage (only tumor patients) |
|---------------|-----|--------|-----------------|------------|---------|-------|-----------------------------|
| 1436          | 64  | male   | Never           | 0          | HC      | HC    |                             |
| 1437          | 65  | male   | Never           | 0          | HC      | HC    |                             |
| 1438          | 64  | male   | Never           | 0          | HC      | HC    |                             |
| 1439          | 63  | male   | Never           | 0          | HC      | HC    |                             |
| 1440          | 63  | male   | Never           | 0          | HC      | HC    |                             |
| 1441          | 59  | female | Never           | 0          | HC      | HC    |                             |
| 1442          | 63  | male   | Never           | 0          | HC      | HC    |                             |
| 1443          | 58  | male   | Never           | 0          | HC      | HC    |                             |
| 1444          | 68  | male   | Never           | 0          | HC      | HC    |                             |
| 1445          | 63  | male   | Never           | 0          | HC      | HC    |                             |
| 1446          | 66  | female | Never           | 0          | HC      | HC    |                             |
| 1447          | 68  | male   | Never           | 0          | HC      | HC    |                             |
| 1448          | 67  | male   | Never           | 0          | HC      | HC    |                             |
| 1449          | 81  | female | Never           | 0          | HC      | HC    |                             |
| 1450          | 71  | female | Never           | 0          | HC      | HC    |                             |
| 1451          | 67  | female | Never           | 0          | HC      | HC    |                             |
| 1452          | 81  | male   | Never           | 0          | HC      | HC    |                             |
| 1453          | 77  | female | Never           | 0          | HC      | HC    |                             |
| 1454          | 71  | female | Never           | 0          | HC      | HC    |                             |
| 1455          | 67  | male   | Never           | 0          | HC      | HC    |                             |
| 1456          | 62  | male   | Never           | 0          | HC      | HC    |                             |
| 1457          | 61  | female | Never           | 0          | HC      | HC    |                             |
| 1458          | 65  | female | Never           | 0          | HC      | HC    |                             |
| 1459          | 73  | female | Never           | 0          | HC      | HC    |                             |
| 1460          | 78  | female | Never           | 0          | HC      | HC    |                             |
| 1461          | 71  | male   | Never           | 0          | HC      | HC    |                             |
| 1462          | 68  | female | Never           | 0          | HC      | HC    |                             |
| 1463          | 62  | male   | Never           | 0          | HC      | HC    |                             |
| 1464          | 61  | female | Never           | 0          | HC      | HC    |                             |
| 1465          | 60  | male   | Never           | 0          | HC      | HC    |                             |
| 1466          | 60  | male   | Never           | 0          | HC      | HC    |                             |
| 1467          | 62  | male   | Never           | 0          | HC      | HC    |                             |
| 1468          | 64  | male   | Never           | 0          | HC      | HC    |                             |
| 1469          | 69  | male   | Never           | 0          | HC      | HC    |                             |
| 1470          | 65  | male   | Never           | 0          | HC      | HC    |                             |
| 1471          | 70  | male   | Never           | 0          | HC      | HC    |                             |
| 1472          | 80  | female | Never           | 0          | HC      | HC    |                             |

| Sample number | Age | Gender | Smoking history | Pack years | Disease | Group | Stage (only tumor patients) |
|---------------|-----|--------|-----------------|------------|---------|-------|-----------------------------|
| 1473          | 65  | female | Never           | 0          | HC      | HC    |                             |
| 1474          | 77  | female | Never           | 0          | HC      | HC    |                             |
| 1475          | 74  | female | Never           | 0          | HC      | HC    |                             |
| 1476          | 64  | male   | Never           | 0          | HC      | HC    |                             |
| 1477          | 64  | female | Never           | 0          | HC      | HC    |                             |
| 1478          | 56  | female | Never           | 0          | HC      | HC    |                             |
| 1479          | 63  | male   | Never           | 0          | HC      | HC    |                             |
| 1480          | 77  | male   | Never           | 0          | HC      | HC    |                             |
| 1481          | 68  | female | Never           | 0          | HC      | HC    |                             |
| 1482          | 72  | male   | Never           | 0          | HC      | HC    |                             |
| 1483          | 68  | male   | Never           | 0          | HC      | HC    |                             |
| 1484          | 67  | male   | Never           | 0          | HC      | HC    |                             |
| 1485          | 65  | male   | Never           | 0          | HC      | HC    |                             |
| 1486          | 78  | female | Never           | 0          | HC      | HC    |                             |
| 1487          | 65  | female | Never           | 0          | HC      | HC    |                             |
| 1488          | 61  | female | Never           | 0          | HC      | HC    |                             |
| 1489          | 72  | male   | Never           | 0          | HC      | HC    |                             |
| 1490          | 80  | male   | Never           | 0          | HC      | HC    |                             |
| 1491          | 59  | female | Never           | 0          | HC      | HC    |                             |
| 1492          | 57  | male   | Never           | 0          | HC      | HC    |                             |
| 1493          | 71  | male   | Never           | 0          | HC      | HC    |                             |
| 1494          | 62  | male   | Never           | 0          | HC      | HC    |                             |
| 1495          | 69  | male   | Never           | 0          | HC      | HC    |                             |
| 1496          | 70  | male   | Never           | 0          | HC      | HC    |                             |
| 1497          | 65  | male   | Never           | 0          | HC      | HC    |                             |
| 1498          | 65  | female | Never           | 0          | HC      | HC    |                             |
| 1499          | 67  | male   | Never           | 0          | HC      | HC    |                             |
| 1500          | 82  | female | Never           | 0          | HC      | HC    |                             |
| 1501          | 69  | female | Never           | 0          | HC      | HC    |                             |
| 1502          | 73  | female | Never           | 0          | HC      | HC    |                             |
| 1503          | 73  | male   | Never           | 0          | HC      | HC    |                             |
| 1504          | 63  | male   | Never           | 0          | HC      | HC    |                             |
| 1505          | 65  | female | Never           | 0          | HC      | HC    |                             |
| 1506          | 59  | female | Never           | 0          | HC      | HC    |                             |
| 1507          | 67  | female | Never           | 0          | HC      | HC    |                             |
| 1508          | 78  | male   | Never           | 0          | HC      | HC    |                             |
| 1509          | 70  | female | Never           | 0          | HC      | HC    |                             |

| Sample number | Age | Gender | Smoking history | Pack years | Disease             | Group | Stage (only tumor patients) |
|---------------|-----|--------|-----------------|------------|---------------------|-------|-----------------------------|
| 1510          | 70  | male   | Never           | 0          | HC                  | HC    |                             |
| 1511          | 62  | female | Never           | 0          | HC                  | HC    |                             |
| 1512          | 82  | male   | Never           | 0          | HC                  | HC    |                             |
| 1513          | 69  | female | Never           | 0          | HC                  | HC    |                             |
| 1514          | 75  | male   | Never           | 0          | HC                  | HC    |                             |
| 1515          | 60  | male   | Never           | 0          | HC                  | HC    |                             |
| 1516          | 71  | female | Never           | 0          | HC                  | HC    |                             |
| 1517          | 61  | male   | Never           | 0          | HC                  | HC    |                             |
| 1518          | 69  | male   | Never           | 0          | HC                  | HC    |                             |
| 1519          | 66  | female | Never           | 0          | HC                  | HC    |                             |
| 1520          | 72  | female | Never           | 0          | HC                  | HC    |                             |
| 1521          | 67  | female | Never           | 0          | HC                  | HC    |                             |
| 1522          | 79  | male   | Never           | 0          | HC                  | HC    |                             |
| 1523          | 55  | female | Never           | 0          | HC                  | HC    |                             |
| 1524          | 63  | female | Never           | 0          | HC                  | HC    |                             |
| 1525          | 81  | male   | Never           | 0          | HC                  | HC    |                             |
| 1526          | 80  | female | Never           | 0          | HC                  | HC    |                             |
| 1527          | 67  | male   | Never           | 0          | HC                  | HC    |                             |
| 1528          | 68  | male   | Never           | 0          | HC                  | HC    |                             |
| 1529          | 69  | male   | Never           | 0          | HC                  | HC    |                             |
| 1530          | 71  | male   | Never           | 0          | HC                  | HC    |                             |
| 1531          | 68  | male   | Never           | 0          | HC                  | HC    |                             |
| 1532          | 66  | male   | Never           | 0          | HC                  | HC    |                             |
| 1533          | 64  | male   | Never           | 0          | HC                  | HC    |                             |
| 1534          | 75  | female | Never           | 0          | HC                  | HC    |                             |
| 1535          | 64  | female | Never           | 0          | HC                  | HC    |                             |
| 1536          | 72  | male   | Never           | 0          | HC                  | HC    |                             |
| 1537          | 65  | female | Never           | 0          | HC                  | HC    |                             |
| 1538          | 74  | female | Never           | 0          | HC                  | HC    |                             |
| 1539          | 73  | male   | Never           | 0          | HC                  | HC    |                             |
| 1540          | 73  | male   | Never           | 0          | HC                  | HC    |                             |
| 1541          | 78  | male   | Never           | 0          | HC                  | HC    |                             |
| 1542          | 72  | male   | Never           | 0          | Parkinson's Disease | OD    |                             |
| 1543          | 74  | female | Never           | 0          | Parkinson's Disease | OD    |                             |
| 1544          | 75  | female | Never           | 0          | HC                  | HC    |                             |
| 1545          | 41  | male   | Never           | 0          | Parkinson's Disease | OD    |                             |
| 1546          | 63  | male   | Never           | 0          | Parkinson's Disease | OD    |                             |

| <b>Sample number</b> | <b>Age</b> | <b>Gender</b> | <b>Smoking history</b> | <b>Pack years</b> | <b>Disease</b>      | <b>Group</b> | <b>Stage (only tumor patients)</b> |
|----------------------|------------|---------------|------------------------|-------------------|---------------------|--------------|------------------------------------|
| 1547                 | 50         | male          | Never                  | 0                 | Parkinson's Disease | OD           |                                    |
| 1548                 | 43         | male          | Never                  | 0                 | Parkinson's Disease | OD           |                                    |
| 1549                 | 64         | female        | Never                  | 0                 | HC                  | HC           |                                    |
| 1550                 | 48         | male          | Never                  | 0                 | Parkinson's Disease | OD           |                                    |
| 1551                 | 61         | female        | Never                  | 0                 | HC                  | HC           |                                    |
| 1552                 | 80         | male          | Never                  | 0                 | HC                  | HC           |                                    |
| 1553                 | 66         | female        | Never                  | 0                 | Parkinson's Disease | OD           |                                    |
| 1554                 | 70         | female        | Never                  | 0                 | Parkinson's Disease | OD           |                                    |
| 1555                 | 81         | female        | Never                  | 0                 | HC                  | HC           |                                    |
| 1556                 | 51         | male          | Never                  | 0                 | HC                  | HC           |                                    |
| 1557                 | 47         | male          | Never                  | 0                 | Parkinson's Disease | OD           |                                    |
| 1558                 | 68         | female        | Never                  | 0                 | HC                  | HC           |                                    |
| 1559                 | 48         | male          | Never                  | 0                 | HC                  | HC           |                                    |
| 1560                 | 73         | female        | Never                  | 0                 | Parkinson's Disease | OD           |                                    |
| 1561                 | 50         | female        | Never                  | 0                 | Parkinson's Disease | OD           |                                    |
| 1562                 | 21         | female        | Never                  | 0                 | HC                  | HC           |                                    |
| 1563                 | 80         | female        | Never                  | 0                 | Parkinson's Disease | OD           |                                    |
| 1564                 | 56         | male          | Never                  | 0                 | Parkinson's Disease | OD           |                                    |
| 1565                 | 20         | female        | Never                  | 0                 | HC                  | HC           |                                    |
| 1566                 | 48         | male          | Never                  | 0                 | HC                  | HC           |                                    |
| 1567                 | 56         | male          | Never                  | 0                 | Parkinson's Disease | OD           |                                    |
| 1568                 | 55         | female        | Never                  | 0                 | Parkinson's Disease | OD           |                                    |
| 1569                 | 73         | female        | Never                  | 0                 | HC                  | HC           |                                    |
| 1570                 | 74         | male          | Never                  | 0                 | Parkinson's Disease | OD           |                                    |
| 1571                 | 75         | male          | Never                  | 0                 | HC                  | HC           |                                    |
| 1572                 | 78         | female        | Never                  | 0                 | Parkinson's Disease | OD           |                                    |
| 1573                 | 56         | male          | Never                  | 0                 | HC                  | HC           |                                    |
| 1574                 | 62         | female        | Never                  | 0                 | HC                  | HC           |                                    |
| 1575                 | 78         | female        | Never                  | 0                 | Parkinson's Disease | OD           |                                    |
| 1576                 | 67         | female        | Never                  | 0                 | Parkinson's Disease | OD           |                                    |
| 1577                 | 45         | female        | Never                  | 0                 | HC                  | HC           |                                    |
| 1578                 | 40         | male          | Never                  | 0                 | Parkinson's Disease | OD           |                                    |
| 1579                 | 69         | female        | Never                  | 0                 | HC                  | HC           |                                    |
| 1580                 | 74         | male          | Never                  | 0                 | HC                  | HC           |                                    |
| 1581                 | 73         | female        | Never                  | 0                 | COPD                | NULD         |                                    |
| 1582                 | 69         | female        | Never                  | 0                 | COPD                | NULD         |                                    |
| 1583                 | 52         | female        | Never                  | 0                 | COPD                | NULD         |                                    |



| Sample number | Age | Gender | Smoking history | Pack years | Disease | Group | Stage (only tumor patients) |
|---------------|-----|--------|-----------------|------------|---------|-------|-----------------------------|
| 1584          | 71  | male   | Never           | 0          | COPD    | NTLD  |                             |
| 1585          | 75  | female | Never           | 0          | COPD    | NTLD  |                             |
| 1586          | 54  | female | Never           | 0          | COPD    | NTLD  |                             |
| 1587          | 65  | female | Never           | 0          | COPD    | NTLD  |                             |
| 1588          | 72  | male   | Never           | 0          | COPD    | NTLD  |                             |
| 1589          | 44  | male   | Never           | 0          | COPD    | NTLD  |                             |
| 1590          | 72  | female | Never           | 0          | COPD    | NTLD  |                             |
| 1591          | 54  | female | Never           | 0          | COPD    | NTLD  |                             |
| 1592          | 67  | male   | Never           | 0          | COPD    | NTLD  |                             |
| 1593          | 76  | male   | Never           | 0          | COPD    | NTLD  |                             |
| 1594          | 62  | male   | Never           | 0          | COPD    | NTLD  |                             |
| 1595          | 72  | male   | Never           | 0          | COPD    | NTLD  |                             |
| 1596          | 75  | female | Never           | 0          | COPD    | NTLD  |                             |
| 1597          | 64  | female | Never           | 0          | COPD    | NTLD  |                             |
| 1598          | 59  | male   | Never           | 0          | COPD    | NTLD  |                             |
| 1599          | 78  | female | Never           | 0          | COPD    | NTLD  |                             |
| 1600          | 76  | male   | Never           | 0          | COPD    | NTLD  |                             |
| 1601          | 81  | female | Never           | 0          | COPD    | NTLD  |                             |
| 1602          | 76  | female | Never           | 0          | COPD    | NTLD  |                             |
| 1603          |     |        | Never           | 0          | HC      | HC    |                             |
| 1604          |     |        | Never           | 0          | HC      | HC    |                             |
| 1605          |     |        | Never           | 0          | HC      | HC    |                             |
| 1606          |     |        | Never           | 0          | HC      | HC    |                             |
| 1607          |     |        | Never           | 0          | HC      | HC    |                             |
| 1608          |     |        | Never           | 0          | HC      | HC    |                             |
| 1609          |     |        | Never           | 0          | HC      | HC    |                             |
| 1610          |     |        | Never           | 0          | HC      | HC    |                             |
| 1611          |     |        | Never           | 0          | HC      | HC    |                             |
| 1612          |     |        | Never           | 0          | HC      | HC    |                             |
| 1613          |     |        | Never           | 0          | HC      | HC    |                             |
| 1614          |     |        | Never           | 0          | HC      | HC    |                             |
| 1615          |     |        | Never           | 0          | HC      | HC    |                             |
| 1616          |     |        | Never           | 0          | HC      | HC    |                             |
| 1617          |     |        | Never           | 0          | HC      | HC    |                             |
| 1618          |     |        | Never           | 0          | HC      | HC    |                             |
| 1619          |     |        | Never           | 0          | HC      | HC    |                             |
| 1620          |     |        | Never           | 0          | HC      | HC    |                             |

| Sample number | Age | Gender | Smoking history | Pack years | Disease    | Group | Stage (only tumor patients) |
|---------------|-----|--------|-----------------|------------|------------|-------|-----------------------------|
| 1621          |     |        | Never           | 0          | HC         | HC    |                             |
| 1622          |     |        | Never           | 0          | HC         | HC    |                             |
| 1623          |     |        | Never           | 0          | HC         | HC    |                             |
| 1624          |     |        | Never           | 0          | HC         | HC    |                             |
| 1625          |     |        | Never           | 0          | HC         | HC    |                             |
| 1626          |     |        | Never           | 0          | HC         | HC    |                             |
| 1627          |     |        | Never           | 0          | HC         | HC    |                             |
| 1628          |     |        | Never           | 0          | HC         | HC    |                             |
| 1629          |     |        | Never           | 0          | HC         | HC    |                             |
| 1630          |     |        | Never           | 0          | HC         | HC    |                             |
| 1631          |     |        | Never           | 0          | HC         | HC    |                             |
| 1632          |     |        | Never           | 0          | HC         | HC    |                             |
| 1633          |     |        | Never           | 0          | HC         | HC    |                             |
| 1634          |     |        | Never           | 0          | HC         | HC    |                             |
| 1635          | 82  | male   | Never           | 0          | otherTumor | OD    |                             |
| 1636          | 87  | female | Never           | 0          | otherTumor | OD    |                             |
| 1637          | 66  | male   | Never           | 0          | otherTumor | OD    |                             |
| 1638          | 25  | male   | Never           | 0          | HC         | HC    |                             |
| 1639          | 19  | male   | Never           | 0          | HC         | HC    |                             |
| 1640          | 25  | male   | Never           | 0          | HC         | HC    |                             |
| 1641          | 25  | male   | Never           | 0          | HC         | HC    |                             |
| 1642          | 37  | male   | Never           | 0          | HC         | HC    |                             |
| 1643          | 34  | male   | Never           | 0          | HC         | HC    |                             |
| 1644          | 34  | male   | Never           | 0          | HC         | HC    |                             |
| 1645          | 34  | male   | Never           | 0          | HC         | HC    |                             |
| 1646          | 34  | male   | Never           | 0          | HC         | HC    |                             |
| 1647          | 22  | male   | Never           | 0          | HC         | HC    |                             |
| 1648          | 22  | male   | Never           | 0          | HC         | HC    |                             |
| 1649          | 29  | male   | Never           | 0          | HC         | HC    |                             |
| 1650          | 29  | male   | Never           | 0          | HC         | HC    |                             |
| 1651          | 19  | male   | Never           | 0          | HC         | HC    |                             |
| 1652          | 37  | male   | Never           | 0          | HC         | HC    |                             |
| 1653          | 25  | male   | Never           | 0          | HC         | HC    |                             |
| 1654          | 27  | male   | Never           | 0          | HC         | HC    |                             |
| 1655          | 27  | male   | Never           | 0          | HC         | HC    |                             |
| 1656          | 30  | male   | Never           | 0          | HC         | HC    |                             |
| 1657          | 30  | male   | Never           | 0          | HC         | HC    |                             |

| <b>Sample number</b> | <b>Age</b> | <b>Gender</b> | <b>Smoking history</b> | <b>Pack years</b> | <b>Disease</b> | <b>Group</b> | <b>Stage (only tumor patients)</b> |
|----------------------|------------|---------------|------------------------|-------------------|----------------|--------------|------------------------------------|
| 1658                 | 45         | male          | Never                  | 0                 | HC             | HC           |                                    |
| 1659                 | 45         | male          | Never                  | 0                 | HC             | HC           |                                    |
| 1660                 | 23         | male          | Never                  | 0                 | HC             | HC           |                                    |
| 1661                 | 23         | male          | Never                  | 0                 | HC             | HC           |                                    |
| 1662                 | 26         | male          | Never                  | 0                 | HC             | HC           |                                    |
| 1663                 | 26         | male          | Never                  | 0                 | HC             | HC           |                                    |
| 1664                 | 42         | male          | Never                  | 0                 | HC             | HC           |                                    |
| 1665                 | 42         | male          | Never                  | 0                 | HC             | HC           |                                    |
| 1666                 | 38         | male          | Never                  | 0                 | HC             | HC           |                                    |
| 1667                 | 38         | male          | Never                  | 0                 | HC             | HC           |                                    |
| 1668                 | 24         | male          | Never                  | 0                 | HC             | HC           |                                    |
| 1669                 | 24         | male          | Never                  | 0                 | HC             | HC           |                                    |
| 1670                 | 22         | male          | Never                  | 0                 | HC             | HC           |                                    |
| 1671                 | 22         | male          | Never                  | 0                 | HC             | HC           |                                    |
| 1672                 | 26         | male          | Never                  | 0                 | HC             | HC           |                                    |
| 1673                 | 26         | male          | Never                  | 0                 | HC             | HC           |                                    |
| 1674                 | 21         | male          | Never                  | 0                 | HC             | HC           |                                    |
| 1675                 | 21         | male          | Never                  | 0                 | HC             | HC           |                                    |
| 1676                 | 24         | male          | Never                  | 0                 | HC             | HC           |                                    |
| 1677                 | 24         | male          | Never                  | 0                 | HC             | HC           |                                    |
| 1678                 | 26         | male          | Never                  | 0                 | HC             | HC           |                                    |
| 1679                 | 26         | male          | Never                  | 0                 | HC             | HC           |                                    |
| 1680                 | 21         | male          | Never                  | 0                 | HC             | HC           |                                    |
| 1681                 | 21         | male          | Never                  | 0                 | HC             | HC           |                                    |
| 1682                 | 26         | male          | Never                  | 0                 | HC             | HC           |                                    |
| 1683                 | 26         | male          | Never                  | 0                 | HC             | HC           |                                    |
| 1684                 | 21         | male          | Never                  | 0                 | HC             | HC           |                                    |
| 1685                 | 21         | male          | Never                  | 0                 | HC             | HC           |                                    |
| 1686                 | 23         | male          | Never                  | 0                 | HC             | HC           |                                    |
| 1687                 | 23         | male          | Never                  | 0                 | HC             | HC           |                                    |
| 1688                 | 25         | male          | Never                  | 0                 | HC             | HC           |                                    |
| 1689                 | 25         | male          | Never                  | 0                 | HC             | HC           |                                    |
| 1690                 | 22         | male          | Never                  | 0                 | HC             | HC           |                                    |
| 1691                 | 22         | male          | Never                  | 0                 | HC             | HC           |                                    |
| 1692                 | 25         | male          | Never                  | 0                 | HC             | HC           |                                    |
| 1693                 | 25         | male          | Never                  | 0                 | HC             | HC           |                                    |
| 1694                 | 21         | male          | Never                  | 0                 | HC             | HC           |                                    |

| Sample number | Age  | Gender | Smoking history | Pack years | Disease                    | Group | Stage (only tumor patients) |
|---------------|------|--------|-----------------|------------|----------------------------|-------|-----------------------------|
| 1695          | 21   | male   | Never           | 0          | HC                         | HC    |                             |
| 1696          | 74   | male   | Past            | 0          | HC                         | HC    |                             |
| 1697          | 61   | male   | Past            | 0          | HC                         | HC    |                             |
| 1698          | 78   | male   | Past            | 0          | HC                         | HC    |                             |
| 1699          | 71   | male   | Past            | 0          | HC                         | HC    |                             |
| 1700          | 68   | male   | Past            | 0          | HC                         | HC    |                             |
| 1701          | 67   | male   | Past            | 0          | HC                         | HC    |                             |
| 1702          | 77   | male   | Past            | 0          | HC                         | HC    |                             |
| 1703          | 68   | male   | Past            | 0          | HC                         | HC    |                             |
| 1704          | 72   | male   | Past            | 0          | HC                         | HC    |                             |
| 1705          | 69   | male   | Past            | 0          | HC                         | HC    |                             |
| 1706          | 73   | male   | Past            | 0          | HC                         | HC    |                             |
| 1707          | 73   | male   | Present         | 0          | HC                         | HC    |                             |
| 1708          | 65   | male   | Present         | 0          | HC                         | HC    |                             |
| 1709          | 77   | male   | Present         | 0          | HC                         | HC    |                             |
| 1710          | 69   | male   | Present         | 0          | HC                         | HC    |                             |
| 1711          | 73   | male   | Present         | 0          | HC                         | HC    |                             |
| 1712          | 60   | male   | Present         | 0          | HC                         | HC    |                             |
| 1713          | 66   | male   | Present         | 0          | COPD                       | NULD  |                             |
| 1714          | 57.1 | male   | NA              |            | Non-Small Cell Lung Cancer | LCa   | 1                           |
| 1715          | 64.3 | male   | NA              |            | Non-Small Cell Lung Cancer | LCa   | 2                           |
| 1716          | 80   | male   | NA              |            | Non-Small Cell Lung Cancer | LCa   | 3                           |
| 1717          | 76.6 | male   | NA              |            | Non-Small Cell Lung Cancer | LCa   | 3                           |
| 1718          | 65.5 | male   | NA              |            | Non-Small Cell Lung Cancer | LCa   | 3                           |
| 1719          | 68   | male   | NA              |            | Non-Small Cell Lung Cancer | LCa   | 2                           |
| 1720          | 65.4 | male   | NA              |            | Non-Small Cell Lung Cancer | LCa   | 1                           |
| 1721          | 49.4 | male   | NA              |            | other Lung Carcinoma       | LCa   |                             |
| 1722          | 54   | male   | NA              |            | other Lung Carcinoma       | LCa   | 4                           |
| 1723          | 73   | female | No              |            | HC                         | HC    |                             |
| 1724          | 57   | female | No              |            | HC                         | HC    |                             |
| 1725          | 72   | male   | No              |            | HC                         | HC    |                             |
| 1726          | 77   | male   | No              |            | HC                         | HC    |                             |
| 1727          | 49   | male   | No              |            | HC                         | HC    |                             |
| 1728          | 59   | male   | No              |            | HC                         | HC    |                             |

| <b>Sample number</b> | <b>Age</b> | <b>Gender</b> | <b>Smoking history</b> | <b>Pack years</b> | <b>Disease</b> | <b>Group</b> | <b>Stage (only tumor patients)</b> |
|----------------------|------------|---------------|------------------------|-------------------|----------------|--------------|------------------------------------|
| 1729                 | 63         | female        | No                     |                   | HC             | HC           |                                    |
| 1730                 | 57         | male          | No                     |                   | HC             | HC           |                                    |
| 1731                 | 69         | female        | No                     |                   | HC             | HC           |                                    |
| 1732                 | 77         | female        | No                     |                   | HC             | HC           |                                    |
| 1733                 | 73         | male          | No                     |                   | HC             | HC           |                                    |
| 1734                 | 80         | male          | No                     |                   | HC             | HC           |                                    |
| 1735                 | 85         | male          | No                     |                   | HC             | HC           |                                    |
| 1736                 | 80         | female        | No                     |                   | HC             | HC           |                                    |
| 1737                 | 63         | female        | No                     |                   | HC             | HC           |                                    |
| 1738                 | 63         | male          | No                     |                   | HC             | HC           |                                    |
| 1739                 | 72         | female        | No                     |                   | HC             | HC           |                                    |
| 1740                 | 80         | female        | No                     |                   | HC             | HC           |                                    |
| 1741                 | 65         | female        | No                     |                   | HC             | HC           |                                    |
| 1742                 | 74         | female        | No                     |                   | HC             | HC           |                                    |
| 1743                 | 72         | female        | No                     |                   | HC             | HC           |                                    |
| 1744                 | 55         | female        | No                     |                   | HC             | HC           |                                    |
| 1745                 | 54         | male          | No                     |                   | HC             | HC           |                                    |
| 1746                 | 58         | male          | No                     |                   | HC             | HC           |                                    |
| 1747                 | 62         | female        | No                     |                   | HC             | HC           |                                    |
| 1748                 | 69         | female        | No                     |                   | HC             | HC           |                                    |
| 1749                 | 69         | female        | No                     |                   | HC             | HC           |                                    |
| 1750                 | 81         | female        | No                     |                   | HC             | HC           |                                    |
| 1751                 | 58         | female        | No                     |                   | HC             | HC           |                                    |
| 1752                 | 52         | female        | No                     |                   | HC             | HC           |                                    |
| 1753                 | 54         | female        | No                     |                   | HC             | HC           |                                    |
| 1754                 | 67         | female        | No                     |                   | HC             | HC           |                                    |
| 1755                 | 46         | male          | No                     |                   | HC             | HC           |                                    |
| 1756                 | 52         | male          | No                     |                   | HC             | HC           |                                    |
| 1757                 | 74         | male          | No                     |                   | HC             | HC           |                                    |
| 1758                 | 56         | female        | No                     |                   | HC             | HC           |                                    |
| 1759                 | 85         | male          | No                     |                   | HC             | HC           |                                    |
| 1760                 | 64         | female        | No                     |                   | HC             | HC           |                                    |
| 1761                 | 63         | female        | No                     |                   | HC             | HC           |                                    |
| 1762                 | 72         | male          | No                     |                   | HC             | HC           |                                    |
| 1763                 | 64         | male          | No                     |                   | HC             | HC           |                                    |
| 1764                 | 73         | female        | No                     |                   | HC             | HC           |                                    |
| 1765                 | 74         | female        | No                     |                   | HC             | HC           |                                    |

| <b>Sample number</b> | <b>Age</b> | <b>Gender</b> | <b>Smoking history</b> | <b>Pack years</b> | <b>Disease</b> | <b>Group</b> | <b>Stage (only tumor patients)</b> |
|----------------------|------------|---------------|------------------------|-------------------|----------------|--------------|------------------------------------|
| 1766                 | 53         | male          | No                     |                   | HC             | HC           |                                    |
| 1767                 | 63         | female        | No                     |                   | HC             | HC           |                                    |
| 1768                 | 79         | female        | No                     |                   | HC             | HC           |                                    |
| 1769                 | 78         | male          | No                     |                   | HC             | HC           |                                    |
| 1770                 | 70         | female        | No                     |                   | HC             | HC           |                                    |
| 1771                 | 59         | male          | No                     |                   | HC             | HC           |                                    |
| 1772                 | 77         | female        | No                     |                   | HC             | HC           |                                    |
| 1773                 | 53         | female        | No                     |                   | HC             | HC           |                                    |
| 1774                 | 69         | male          | No                     |                   | HC             | HC           |                                    |
| 1775                 | 74         | male          | No                     |                   | HC             | HC           |                                    |
| 1776                 | 63         | female        | No                     |                   | HC             | HC           |                                    |
| 1777                 | 67         | female        | No                     |                   | HC             | HC           |                                    |
| 1778                 | 87         | male          | No                     |                   | HC             | HC           |                                    |
| 1779                 | 69         | female        | No                     |                   | HC             | HC           |                                    |
| 1780                 | 63         | female        | No                     |                   | HC             | HC           |                                    |
| 1781                 | 85         | male          | No                     |                   | HC             | HC           |                                    |
| 1782                 | 56         | female        | No                     |                   | HC             | HC           |                                    |
| 1783                 | 63         | female        | No                     |                   | HC             | HC           |                                    |
| 1784                 | 74         | male          | No                     |                   | HC             | HC           |                                    |
| 1785                 | 57         | male          | No                     |                   | HC             | HC           |                                    |
| 1786                 | 65         | male          | No                     |                   | HC             | HC           |                                    |
| 1787                 | 59         | female        | No                     |                   | HC             | HC           |                                    |
| 1788                 | 76         | female        | No                     |                   | HC             | HC           |                                    |
| 1789                 | 66         | female        | No                     |                   | HC             | HC           |                                    |
| 1790                 | 75         | female        | No                     |                   | HC             | HC           |                                    |
| 1791                 | 64         | female        | No                     |                   | HC             | HC           |                                    |
| 1792                 | 60         | female        | No                     |                   | HC             | HC           |                                    |
| 1793                 | 79         | female        | No                     |                   | HC             | HC           |                                    |
| 1794                 | 61         | male          | No                     |                   | HC             | HC           |                                    |
| 1795                 | 65         | male          | No                     |                   | HC             | HC           |                                    |
| 1796                 | 69         | male          | No                     |                   | HC             | HC           |                                    |
| 1797                 | 73         | male          | No                     |                   | HC             | HC           |                                    |
| 1798                 | 67         | male          | No                     |                   | HC             | HC           |                                    |
| 1799                 | 37         | male          | No                     |                   | HC             | HC           |                                    |
| 1800                 | 69         | female        | No                     |                   | HC             | HC           |                                    |
| 1801                 | 35         | male          | No                     |                   | HC             | HC           |                                    |
| 1802                 | 73         | male          | No                     |                   | HC             | HC           |                                    |

| Sample number | Age  | Gender | Smoking history | Pack years | Disease                | Group | Stage (only tumor patients) |
|---------------|------|--------|-----------------|------------|------------------------|-------|-----------------------------|
| 1803          | 51   | male   | No              |            | HC                     | HC    |                             |
| 1804          | 82   | male   | No              |            | HC                     | HC    |                             |
| 1805          | 72   | female | No              |            | HC                     | HC    |                             |
| 1806          | 78   | female | No              |            | HC                     | HC    |                             |
| 1807          | 52   | male   | No              |            | HC                     | HC    |                             |
| 1808          | 78   | female | No              |            | HC                     | HC    |                             |
| 1809          | 58   | male   | No              |            | HC                     | HC    |                             |
| 1810          | 64   | male   | No              |            | HC                     | HC    |                             |
| 1811          | 75   | male   | No              |            | HC                     | HC    |                             |
| 1812          | 54   | male   | No              |            | HC                     | HC    |                             |
| 1813          | 56   | female | No              |            | HC                     | HC    |                             |
| 1814          | 56   | female | No              |            | HC                     | HC    |                             |
| 1815          | 50   | male   | No              |            | HC                     | HC    |                             |
| 1816          | 81   | female | No              |            | HC                     | HC    |                             |
| 1817          | 68   | male   | No              |            | HC                     | HC    |                             |
| 1818          | 77   | male   | No              |            | HC                     | HC    |                             |
| 1819          | 52   | male   | No              |            | HC                     | HC    |                             |
| 1820          | 63   | female | No              |            | HC                     | HC    |                             |
| 1821          | 74   | female | No              |            | HC                     | HC    |                             |
| 1822          | 69   | male   | No              |            | HC                     | HC    |                             |
| 1823          | 65   | female | No              |            | HC                     | HC    |                             |
| 1824          | 60   | male   | No              |            | HC                     | HC    |                             |
| 1825          | 52   | male   | No              |            | HC                     | HC    |                             |
| 1826          | 55   | male   | No              |            | HC                     | HC    |                             |
| 1827          | 63   | male   | No              |            | HC                     | HC    |                             |
| 1828          | 87   | male   | No              |            | HC                     | HC    |                             |
| 1829          | 75   | male   | No              |            | HC                     | HC    |                             |
| 1830          | 63   | male   | No              |            | HC                     | HC    |                             |
| 1831          | 69   | female | No              |            | HC                     | HC    |                             |
| 1832          | 71   | female | No              |            | HC                     | HC    |                             |
| 1833          | 86.5 | male   | Past            |            | Small Cell Lung Cancer | LCa   | 3                           |
| 1834          | 65.7 | male   | Past            |            | Small Cell Lung Cancer | LCa   | 3                           |
| 1835          | 65   | female | Past            |            | Heart Disease          | OD    |                             |
| 1836          | 52   | male   | Past            |            | Heart Disease          | OD    |                             |
| 1837          | 71   | male   | Past            |            | Heart Disease          | OD    |                             |
| 1838          | 69   | male   | Past            |            | Heart Disease          | OD    |                             |
| 1839          | 78   | male   | Past            |            | Heart Disease          | OD    |                             |

| <b>Sample number</b> | <b>Age</b> | <b>Gender</b> | <b>Smoking history</b> | <b>Pack years</b> | <b>Disease</b> | <b>Group</b> | <b>Stage (only tumor patients)</b> |
|----------------------|------------|---------------|------------------------|-------------------|----------------|--------------|------------------------------------|
| 1840                 | 63         | male          | Past                   |                   | Heart Disease  | OD           |                                    |
| 1841                 | 67         | male          | Past                   |                   | Heart Disease  | OD           |                                    |
| 1842                 | 56         | male          | Past                   |                   | Heart Disease  | OD           |                                    |
| 1843                 | 77         | female        | Past                   |                   | Heart Disease  | OD           |                                    |
| 1844                 | 72         | female        | Past                   |                   | Heart Disease  | OD           |                                    |
| 1845                 | 64         | male          | Past                   |                   | Heart Disease  | OD           |                                    |
| 1846                 | 57         | male          | Past                   |                   | Heart Disease  | OD           |                                    |
| 1847                 | 80         | male          | Past                   |                   | Heart Disease  | OD           |                                    |
| 1848                 | 74         | female        | Past                   |                   | Heart Disease  | OD           |                                    |
| 1849                 | 53         | female        | Past                   |                   | Heart Disease  | OD           |                                    |
| 1850                 | 76         | female        | Past                   |                   | Heart Disease  | OD           |                                    |
| 1851                 | 75         | male          | Past                   |                   | Heart Disease  | OD           |                                    |
| 1852                 | 58         | male          | Past                   |                   | Heart Disease  | OD           |                                    |
| 1853                 | 73         | male          | Past                   |                   | Heart Disease  | OD           |                                    |
| 1854                 | 62         | male          | Past                   |                   | Heart Disease  | OD           |                                    |
| 1855                 | 63         | male          | Past                   |                   | Heart Disease  | OD           |                                    |
| 1856                 | 65         | male          | Past                   |                   | Heart Disease  | OD           |                                    |
| 1857                 | 61         | male          | Past                   |                   | Heart Disease  | OD           |                                    |
| 1858                 | 52         | male          | Past                   |                   | Heart Disease  | OD           |                                    |
| 1859                 | 66         | male          | Past                   |                   | Heart Disease  | OD           |                                    |
| 1860                 | 65         | female        | Past                   |                   | Heart Disease  | OD           |                                    |
| 1861                 | 39         | female        | Past                   |                   | Heart Disease  | OD           |                                    |
| 1862                 | 79         | male          | Past                   |                   | Heart Disease  | OD           |                                    |
| 1863                 | 75         | male          | Past                   |                   | Heart Disease  | OD           |                                    |
| 1864                 | 59         | male          | Past                   |                   | Heart Disease  | OD           |                                    |
| 1865                 | 69         | male          | Past                   |                   | Heart Disease  | OD           |                                    |
| 1866                 | 59         | male          | Past                   |                   | Heart Disease  | OD           |                                    |
| 1867                 | 57         | male          | Past                   |                   | Heart Disease  | OD           |                                    |
| 1868                 | 61         | male          | Past                   |                   | Heart Disease  | OD           |                                    |
| 1869                 | 67         | female        | Past                   |                   | Heart Disease  | OD           |                                    |
| 1870                 | 86         | male          | Past                   |                   | Heart Disease  | OD           |                                    |
| 1871                 | 80         | male          | Past                   |                   | Heart Disease  | OD           |                                    |
| 1872                 | 62         | male          | Past                   |                   | Heart Disease  | OD           |                                    |
| 1873                 | 77         | male          | Past                   |                   | Heart Disease  | OD           |                                    |
| 1874                 | 79         | male          | Past                   |                   | Heart Disease  | OD           |                                    |
| 1875                 | 66         | female        | Past                   |                   | Heart Disease  | OD           |                                    |
| 1876                 | 66         | male          | Past                   |                   | Heart Disease  | OD           |                                    |



| <b>Sample number</b> | <b>Age</b> | <b>Gender</b> | <b>Smoking history</b> | <b>Pack years</b> | <b>Disease</b> | <b>Group</b> | <b>Stage (only tumor patients)</b> |
|----------------------|------------|---------------|------------------------|-------------------|----------------|--------------|------------------------------------|
| 1877                 | 70         | male          | Past                   |                   | Heart Disease  | OD           |                                    |
| 1878                 | 64         | male          | Past                   |                   | Heart Disease  | OD           |                                    |
| 1879                 | 64         | male          | Past                   |                   | Heart Disease  | OD           |                                    |
| 1880                 | 58         | male          | Past                   |                   | Heart Disease  | OD           |                                    |
| 1881                 | 73         | male          | Past                   |                   | Heart Disease  | OD           |                                    |
| 1882                 | 79         | male          | Past                   |                   | Heart Disease  | OD           |                                    |
| 1883                 | 78         | male          | Past                   |                   | Heart Disease  | OD           |                                    |
| 1884                 | 60         | male          | Past                   |                   | Heart Disease  | OD           |                                    |
| 1885                 | 60         | male          | Past                   |                   | Heart Disease  | OD           |                                    |
| 1886                 | 79         | male          | Past                   |                   | Heart Disease  | OD           |                                    |
| 1887                 | 76         | female        | Past                   |                   | Heart Disease  | OD           |                                    |
| 1888                 | 69         | male          | Past                   |                   | Heart Disease  | OD           |                                    |
| 1889                 | 85         | male          | Past                   |                   | Heart Disease  | OD           |                                    |
| 1890                 | 54         | male          | Past                   |                   | Heart Disease  | OD           |                                    |
| 1891                 | 73         | male          | Past                   |                   | Heart Disease  | OD           |                                    |
| 1892                 | 84         | male          | Past                   |                   | Heart Disease  | OD           |                                    |
| 1893                 | 53         | male          | Past                   |                   | Heart Disease  | OD           |                                    |
| 1894                 | 61         | male          | Past                   |                   | Heart Disease  | OD           |                                    |
| 1895                 | 67         | male          | Past                   |                   | Heart Disease  | OD           |                                    |
| 1896                 | 79         | male          | Past                   |                   | Heart Disease  | OD           |                                    |
| 1897                 | 77         | male          | Past                   |                   | Heart Disease  | OD           |                                    |
| 1898                 | 58         | male          | Past                   |                   | Heart Disease  | OD           |                                    |
| 1899                 | 78         | male          | Past                   |                   | Heart Disease  | OD           |                                    |
| 1900                 | 61         | male          | Past                   |                   | Heart Disease  | OD           |                                    |
| 1901                 | 78         | male          | Past                   |                   | Heart Disease  | OD           |                                    |
| 1902                 | 71         | male          | Past                   |                   | Heart Disease  | OD           |                                    |
| 1903                 | 78         | male          | Past                   |                   | Heart Disease  | OD           |                                    |
| 1904                 | 75         | female        | Past                   |                   | Heart Disease  | OD           |                                    |
| 1905                 | 66         | female        | Past                   |                   | Heart Disease  | OD           |                                    |
| 1906                 | 77         | male          | Past                   |                   | Heart Disease  | OD           |                                    |
| 1907                 | 60         | male          | Past                   |                   | Heart Disease  | OD           |                                    |
| 1908                 | 75         | male          | Past                   |                   | Heart Disease  | OD           |                                    |
| 1909                 | 80         | male          | Past                   |                   | Heart Disease  | OD           |                                    |
| 1910                 | 78         | male          | Past                   |                   | Heart Disease  | OD           |                                    |
| 1911                 | 75         | female        | Past                   |                   | Heart Disease  | OD           |                                    |
| 1912                 | 79         | male          | Past                   |                   | Heart Disease  | OD           |                                    |
| 1913                 | 74         | male          | Past                   |                   | Heart Disease  | OD           |                                    |

| <b>Sample number</b> | <b>Age</b> | <b>Gender</b> | <b>Smoking history</b> | <b>Pack years</b> | <b>Disease</b> | <b>Group</b> | <b>Stage (only tumor patients)</b> |
|----------------------|------------|---------------|------------------------|-------------------|----------------|--------------|------------------------------------|
| 1914                 | 21         | male          | Past                   |                   | Heart Disease  | OD           |                                    |
| 1915                 | 55         | male          | Past                   |                   | Heart Disease  | OD           |                                    |
| 1916                 | 72         | male          | Past                   |                   | Heart Disease  | OD           |                                    |
| 1917                 | 53         | male          | Past                   |                   | Heart Disease  | OD           |                                    |
| 1918                 | 73         | male          | Past                   |                   | Heart Disease  | OD           |                                    |
| 1919                 | 79         | male          | Past                   |                   | Heart Disease  | OD           |                                    |
| 1920                 | 78         | male          | Past                   |                   | Heart Disease  | OD           |                                    |
| 1921                 | 74         | male          | Past                   |                   | Heart Disease  | OD           |                                    |
| 1922                 | 79         | male          | Past                   |                   | Heart Disease  | OD           |                                    |
| 1923                 | 76         | female        | Past                   |                   | Heart Disease  | OD           |                                    |
| 1924                 | 77         | male          | Past                   |                   | Heart Disease  | OD           |                                    |
| 1925                 | 63         | male          | Past                   |                   | Heart Disease  | OD           |                                    |
| 1926                 | 58         | male          | Past                   |                   | Heart Disease  | OD           |                                    |
| 1927                 | 82         | female        | Past                   |                   | Heart Disease  | OD           |                                    |
| 1928                 | 71         | male          | Past                   |                   | Heart Disease  | OD           |                                    |
| 1929                 | 71         | female        | Past                   |                   | Heart Disease  | OD           |                                    |
| 1930                 | 76         | male          | Past                   |                   | Heart Disease  | OD           |                                    |
| 1931                 | 71         | male          | Past                   |                   | Heart Disease  | OD           |                                    |
| 1932                 | 25         | male          | Past                   |                   | Heart Disease  | OD           |                                    |
| 1933                 | 71         | male          | Past                   |                   | Heart Disease  | OD           |                                    |
| 1934                 | 69         | male          | Past                   |                   | Heart Disease  | OD           |                                    |
| 1935                 | 83         | female        | Past                   |                   | Heart Disease  | OD           |                                    |
| 1936                 | 90         | male          | Past                   |                   | Heart Disease  | OD           |                                    |
| 1937                 | 78         | male          | Past                   |                   | Heart Disease  | OD           |                                    |
| 1938                 | 87         | male          | Past                   |                   | Heart Disease  | OD           |                                    |
| 1939                 | 71         | male          | Past                   |                   | Heart Disease  | OD           |                                    |
| 1940                 | 75         | male          | Past                   |                   | Heart Disease  | OD           |                                    |
| 1941                 | 63         | female        | Past                   |                   | Heart Disease  | OD           |                                    |
| 1942                 | 76         | male          | Past                   |                   | Heart Disease  | OD           |                                    |
| 1943                 | 72         | male          | Past                   |                   | Heart Disease  | OD           |                                    |
| 1944                 | 61         | male          | Past                   |                   | Heart Disease  | OD           |                                    |
| 1945                 | 69         | male          | Past                   |                   | Heart Disease  | OD           |                                    |
| 1946                 | 70         | male          | Past                   |                   | Heart Disease  | OD           |                                    |
| 1947                 | 82         | male          | Past                   |                   | Heart Disease  | OD           |                                    |
| 1948                 | 65         | female        | Past                   |                   | Heart Disease  | OD           |                                    |
| 1949                 | 74         | male          | Past                   |                   | Heart Disease  | OD           |                                    |
| 1950                 | 58         | male          | Past                   |                   | Heart Disease  | OD           |                                    |

| <b>Sample number</b> | <b>Age</b> | <b>Gender</b> | <b>Smoking history</b> | <b>Pack years</b> | <b>Disease</b> | <b>Group</b> | <b>Stage (only tumor patients)</b> |
|----------------------|------------|---------------|------------------------|-------------------|----------------|--------------|------------------------------------|
| 1951                 | 77         | male          | Past                   |                   | Heart Disease  | OD           |                                    |
| 1952                 | 71         | male          | Past                   |                   | Heart Disease  | OD           |                                    |
| 1953                 | 77         | male          | Past                   |                   | Heart Disease  | OD           |                                    |
| 1954                 | 77         | male          | Past                   |                   | Heart Disease  | OD           |                                    |
| 1955                 | 68         | male          | Past                   |                   | Heart Disease  | OD           |                                    |
| 1956                 | 74         | female        | Past                   |                   | Heart Disease  | OD           |                                    |
| 1957                 | 80         | male          | Past                   |                   | Heart Disease  | OD           |                                    |
| 1958                 | 73         | male          | Past                   |                   | Heart Disease  | OD           |                                    |
| 1959                 | 68         | male          | Past                   |                   | Heart Disease  | OD           |                                    |
| 1960                 | 76         | male          | Past                   |                   | Heart Disease  | OD           |                                    |
| 1961                 | 90         | male          | Past                   |                   | Heart Disease  | OD           |                                    |
| 1962                 | 64         | male          | Past                   |                   | Heart Disease  | OD           |                                    |
| 1963                 | 68         | female        | Past                   |                   | Heart Disease  | OD           |                                    |
| 1964                 | 46         | male          | Past                   |                   | Heart Disease  | OD           |                                    |
| 1965                 | 62         | male          | Past                   |                   | Heart Disease  | OD           |                                    |
| 1966                 | 61         | male          | Past                   |                   | Heart Disease  | OD           |                                    |
| 1967                 | 71         | male          | Past                   |                   | Heart Disease  | OD           |                                    |
| 1968                 | 63         | male          | Past                   |                   | Heart Disease  | OD           |                                    |
| 1969                 | 55         | male          | Past                   |                   | Heart Disease  | OD           |                                    |
| 1970                 | 38         | male          | Past                   |                   | Heart Disease  | OD           |                                    |
| 1971                 | 33         | male          | Past                   |                   | Heart Disease  | OD           |                                    |
| 1972                 | 43         | female        | Past                   |                   | Heart Disease  | OD           |                                    |
| 1973                 | 48         | male          | Past                   |                   | Heart Disease  | OD           |                                    |
| 1974                 | 41         | male          | Past                   |                   | Heart Disease  | OD           |                                    |
| 1975                 | 66         | female        | Past                   |                   | Heart Disease  | OD           |                                    |
| 1976                 | 66         | male          | Past                   |                   | Heart Disease  | OD           |                                    |
| 1977                 | 93         | female        | Past                   |                   | Heart Disease  | OD           |                                    |
| 1978                 | 75         | female        | Past                   |                   | Heart Disease  | OD           |                                    |
| 1979                 | 83         | female        | Past                   |                   | Heart Disease  | OD           |                                    |
| 1980                 | 66         | male          | Past                   |                   | Heart Disease  | OD           |                                    |
| 1981                 | 57         | male          | Past                   |                   | Heart Disease  | OD           |                                    |
| 1982                 | 74         | male          | Past                   |                   | Heart Disease  | OD           |                                    |
| 1983                 | 59         | male          | Past                   |                   | Heart Disease  | OD           |                                    |
| 1984                 | 60         | male          | Past                   |                   | Heart Disease  | OD           |                                    |
| 1985                 | 73         | male          | Past                   |                   | Heart Disease  | OD           |                                    |
| 1986                 | 46         | female        | Past                   |                   | Heart Disease  | OD           |                                    |
| 1987                 | 47         | female        | Past                   |                   | Heart Disease  | OD           |                                    |

| Sample number | Age  | Gender | Smoking history | Pack years | Disease                    | Group | Stage (only tumor patients) |
|---------------|------|--------|-----------------|------------|----------------------------|-------|-----------------------------|
| 1988          | 58   | male   | Past            |            | Heart Disease              | OD    |                             |
| 1989          | 84   | male   | Past            |            | Heart Disease              | OD    |                             |
| 1990          | 74   | male   | Past            |            | Heart Disease              | OD    |                             |
| 1991          | 58   | male   | Past            |            | Heart Disease              | OD    |                             |
| 1992          | 54   | male   | Past            |            | Heart Disease              | OD    |                             |
| 1993          | 71   | female | Past            |            | Heart Disease              | OD    |                             |
| 1994          | 73   | male   | Past            |            | Heart Disease              | OD    |                             |
| 1995          | 79   | male   | Past            |            | Heart Disease              | OD    |                             |
| 1996          | 56   | female | Past            |            | Heart Disease              | OD    |                             |
| 1997          | 66   | male   | Past            |            | Heart Disease              | OD    |                             |
| 1998          | 66   | male   | Past            |            | Heart Disease              | OD    |                             |
| 1999          | 64   | male   | Past            |            | Heart Disease              | OD    |                             |
| 2000          | 51   | male   | Past            |            | Heart Disease              | OD    |                             |
| 2001          | 51   | male   | Past            |            | Heart Disease              | OD    |                             |
| 2002          | 61   | male   | Past            |            | Heart Disease              | OD    |                             |
| 2003          | 85   | male   | Past            |            | Heart Disease              | OD    |                             |
| 2004          | 35   | male   | Past            |            | Heart Disease              | OD    |                             |
| 2005          | 83   | male   | Past            |            | Heart Disease              | OD    |                             |
| 2006          | 42   | male   | Past            |            | Heart Disease              | OD    |                             |
| 2007          | 75   | male   | Past            |            | Heart Disease              | OD    |                             |
| 2008          | 61   | male   | Past            |            | Heart Disease              | OD    |                             |
| 2009          | 82   | male   | Past            |            | Heart Disease              | OD    |                             |
| 2010          | 76   | male   | Past            |            | Heart Disease              | OD    |                             |
| 2011          | 74   | male   | Past            |            | Heart Disease              | OD    |                             |
| 2012          | 74   | female | Past            |            | NTLD                       | NTLD  |                             |
| 2013          | 81.5 | male   | Past            |            | NTLD                       | NTLD  |                             |
| 2014          | 68   | male   | Past            |            | HC                         | HC    |                             |
| 2015          | 63   | male   | Past            |            | HC                         | HC    |                             |
| 2016          | 65   | male   | Past            |            | HC                         | HC    |                             |
| 2017          | 78   | female | Past            |            | HC                         | HC    |                             |
| 2018          | 61   | male   | Past            |            | HC                         | HC    |                             |
| 2019          | 72   | female | Past            |            | HC                         | HC    |                             |
| 2020          | 65   | male   | Past            |            | HC                         | HC    |                             |
| 2021          | 64   | female | Past            |            | HC                         | HC    |                             |
| 2022          | 73   | male   | Past            |            | otherTumor                 | OD    |                             |
| 2023          | 62.3 | male   | Present         |            | Non-Small Cell Lung Cancer | LCa   |                             |

| Sample number | Age  | Gender | Smoking history | Pack years | Disease                    | Group | Stage (only tumor patients) |
|---------------|------|--------|-----------------|------------|----------------------------|-------|-----------------------------|
| 2024          | 66.4 | male   | Present         |            | Non-Small Cell Lung Cancer | LCa   | 3                           |
| 2025          | 63.5 | male   | Present         |            | other Lung Carcinoma       | LCa   | 4                           |
| 2026          | 63.6 | male   | Present         |            | other Lung Carcinoma       | LCa   | 4                           |
| 2027          | 54   | female | Present         |            | Heart Disease              | OD    |                             |
| 2028          | 55   | male   | Present         |            | Heart Disease              | OD    |                             |
| 2029          | 51   | male   | Present         |            | Heart Disease              | OD    |                             |
| 2030          | 88   | male   | Present         |            | Heart Disease              | OD    |                             |
| 2031          | 74   | male   | Present         |            | Heart Disease              | OD    |                             |
| 2032          | 83   | male   | Present         |            | Heart Disease              | OD    |                             |
| 2033          | 61   | female | Present         |            | Heart Disease              | OD    |                             |
| 2034          | 45   | male   | Present         |            | Heart Disease              | OD    |                             |
| 2035          | 68   | female | Present         |            | Heart Disease              | OD    |                             |
| 2036          | 47   | male   | Present         |            | Heart Disease              | OD    |                             |
| 2037          | 42   | female | Present         |            | Heart Disease              | OD    |                             |
| 2038          | 59   | female | Present         |            | Heart Disease              | OD    |                             |
| 2039          | 66   | male   | Present         |            | Heart Disease              | OD    |                             |
| 2040          | 56   | male   | Present         |            | Heart Disease              | OD    |                             |
| 2041          | 52   | male   | Present         |            | Heart Disease              | OD    |                             |
| 2042          | 49   | male   | Present         |            | Heart Disease              | OD    |                             |
| 2043          | 64   | female | Present         |            | Heart Disease              | OD    |                             |
| 2044          | 61   | male   | Present         |            | Heart Disease              | OD    |                             |
| 2045          | 46   | male   | Present         |            | Heart Disease              | OD    |                             |
| 2046          | 62   | male   | Present         |            | Heart Disease              | OD    |                             |
| 2047          | 67   | female | Present         |            | Heart Disease              | OD    |                             |
| 2048          | 60   | male   | Present         |            | Heart Disease              | OD    |                             |
| 2049          | 60   | female | Present         |            | Heart Disease              | OD    |                             |
| 2050          | 68   | female | Present         |            | Heart Disease              | OD    |                             |
| 2051          | 77   | male   | Present         |            | Heart Disease              | OD    |                             |
| 2052          | 63   | male   | Present         |            | Heart Disease              | OD    |                             |
| 2053          | 57   | male   | Present         |            | Heart Disease              | OD    |                             |
| 2054          | 59   | male   | Present         |            | Heart Disease              | OD    |                             |
| 2055          | 43   | male   | Present         |            | Heart Disease              | OD    |                             |
| 2056          | 66   | male   | Present         |            | Heart Disease              | OD    |                             |
| 2057          | 53   | male   | Present         |            | Heart Disease              | OD    |                             |
| 2058          | 61   | female | Present         |            | Heart Disease              | OD    |                             |
| 2059          | 54   | male   | Present         |            | Heart Disease              | OD    |                             |
| 2060          | 57   | male   | Present         |            | Heart Disease              | OD    |                             |

| <b>Sample number</b> | <b>Age</b> | <b>Gender</b> | <b>Smoking history</b> | <b>Pack years</b> | <b>Disease</b> | <b>Group</b> | <b>Stage (only tumor patients)</b> |
|----------------------|------------|---------------|------------------------|-------------------|----------------|--------------|------------------------------------|
| 2061                 | 47         | female        | Present                |                   | Heart Disease  | OD           |                                    |
| 2062                 | 50         | male          | Present                |                   | Heart Disease  | OD           |                                    |
| 2063                 | 49         | male          | Present                |                   | Heart Disease  | OD           |                                    |
| 2064                 | 44         | male          | Present                |                   | Heart Disease  | OD           |                                    |
| 2065                 | 56         | male          | Present                |                   | Heart Disease  | OD           |                                    |
| 2066                 | 62         | female        | Present                |                   | Heart Disease  | OD           |                                    |
| 2067                 | 60         | male          | Present                |                   | Heart Disease  | OD           |                                    |
| 2068                 | 51         | female        | Present                |                   | Heart Disease  | OD           |                                    |
| 2069                 | 57         | male          | Present                |                   | Heart Disease  | OD           |                                    |
| 2070                 | 56         | female        | Present                |                   | Heart Disease  | OD           |                                    |
| 2071                 | 32         | male          | Present                |                   | Heart Disease  | OD           |                                    |
| 2072                 | 76         | male          | Present                |                   | Heart Disease  | OD           |                                    |
| 2073                 | 69         | male          | Present                |                   | Heart Disease  | OD           |                                    |
| 2074                 | 50         | male          | Present                |                   | Heart Disease  | OD           |                                    |
| 2075                 | 79         | male          | Present                |                   | Heart Disease  | OD           |                                    |
| 2076                 | 44         | male          | Present                |                   | Heart Disease  | OD           |                                    |
| 2077                 | 69         | male          | Present                |                   | Heart Disease  | OD           |                                    |
| 2078                 | 54         | female        | Present                |                   | Heart Disease  | OD           |                                    |
| 2079                 | 51         | male          | Present                |                   | Heart Disease  | OD           |                                    |
| 2080                 | 58         | male          | Present                |                   | Heart Disease  | OD           |                                    |
| 2081                 | 68         | male          | Present                |                   | Heart Disease  | OD           |                                    |
| 2082                 | 61         | male          | Present                |                   | Heart Disease  | OD           |                                    |
| 2083                 | 80         | female        | Present                |                   | Heart Disease  | OD           |                                    |
| 2084                 | 30         | male          | Present                |                   | Heart Disease  | OD           |                                    |
| 2085                 | 58         | female        | Present                |                   | Heart Disease  | OD           |                                    |
| 2086                 | 60         | male          | Present                |                   | Heart Disease  | OD           |                                    |
| 2087                 | 37         | female        | Present                |                   | Heart Disease  | OD           |                                    |
| 2088                 | 77         | male          | Present                |                   | Heart Disease  | OD           |                                    |
| 2089                 | 35         | male          | Present                |                   | Heart Disease  | OD           |                                    |
| 2090                 | 55         | male          | Present                |                   | Heart Disease  | OD           |                                    |
| 2091                 | 50         | male          | Present                |                   | Heart Disease  | OD           |                                    |
| 2092                 | 64         | male          | Present                |                   | Heart Disease  | OD           |                                    |
| 2093                 | 49         | male          | Present                |                   | Heart Disease  | OD           |                                    |
| 2094                 | 78         | male          | Present                |                   | Heart Disease  | OD           |                                    |
| 2095                 | 72         | female        | Present                |                   | Heart Disease  | OD           |                                    |
| 2096                 | 82         | male          | Present                |                   | Heart Disease  | OD           |                                    |
| 2097                 | 70         | female        | Present                |                   | Heart Disease  | OD           |                                    |

| <b>Sample number</b> | <b>Age</b> | <b>Gender</b> | <b>Smoking history</b> | <b>Pack years</b> | <b>Disease</b>         | <b>Group</b> | <b>Stage (only tumor patients)</b> |
|----------------------|------------|---------------|------------------------|-------------------|------------------------|--------------|------------------------------------|
| 2098                 | 51         | male          | Present                |                   | Heart Disease          | OD           |                                    |
| 2099                 | 52         | male          | Present                |                   | Heart Disease          | OD           |                                    |
| 2100                 | 71         | male          | Present                |                   | Heart Disease          | OD           |                                    |
| 2101                 | 72         | male          | Present                |                   | Heart Disease          | OD           |                                    |
| 2102                 | 31         | male          | Present                |                   | Heart Disease          | OD           |                                    |
| 2103                 | 59         | male          | Present                |                   | Heart Disease          | OD           |                                    |
| 2104                 | 41         | male          | Present                |                   | Heart Disease          | OD           |                                    |
| 2105                 | 69         | female        | Present                |                   | Heart Disease          | OD           |                                    |
| 2106                 | 60         | male          | Present                |                   | Heart Disease          | OD           |                                    |
| 2107                 | 58         | male          | Present                |                   | Heart Disease          | OD           |                                    |
| 2108                 | 76         | female        | Present                |                   | Heart Disease          | OD           |                                    |
| 2109                 | 66         | male          | Present                |                   | Heart Disease          | OD           |                                    |
| 2110                 | 67         | male          | Present                |                   | Heart Disease          | OD           |                                    |
| 2111                 | 55         | male          | Present                |                   | Heart Disease          | OD           |                                    |
| 2112                 | 48         | male          | Present                |                   | Heart Disease          | OD           |                                    |
| 2113                 | 40         | male          | Present                |                   | Heart Disease          | OD           |                                    |
| 2114                 | 55         | female        | Present                |                   | Heart Disease          | OD           |                                    |
| 2115                 | 45         | male          | Present                |                   | Heart Disease          | OD           |                                    |
| 2116                 | 70         | female        | Present                |                   | Heart Disease          | OD           |                                    |
| 2117                 | 71         | male          | Present                |                   | Heart Disease          | OD           |                                    |
| 2118                 | 68         | male          | Present                |                   | Heart Disease          | OD           |                                    |
| 2119                 | 60         | male          | Present                |                   | Heart Disease          | OD           |                                    |
| 2120                 | 73         | male          | Present                |                   | Heart Disease          | OD           |                                    |
| 2121                 | 63         | male          | Present                |                   | Heart Disease          | OD           |                                    |
| 2122                 | 60         | male          | Present                |                   | Heart Disease          | OD           |                                    |
| 2123                 | 55         | male          | Present                |                   | Heart Disease          | OD           |                                    |
| 2124                 | 63         | female        | Present                |                   | Heart Disease          | OD           |                                    |
| 2125                 | 51         | male          | Present                |                   | Heart Disease          | OD           |                                    |
| 2126                 | 65         | male          | Present                |                   | Heart Disease          | OD           |                                    |
| 2127                 | 50.9       | male          | Present                |                   | NILD                   | NILD         |                                    |
| 2128                 | 56.1       | male          | Present                |                   | COPD                   | NILD         |                                    |
| 2129                 | 58.6       | male          | Present                |                   | COPD                   | NILD         |                                    |
| 2130                 | 55         | female        | Present                |                   | Small Cell Lung Cancer | LCa          |                                    |
| 2131                 | 55.1       | female        | Present                |                   | Small Cell Lung Cancer | LCa          |                                    |
| 2132                 | 68         | female        | Present                |                   | HC                     | HC           |                                    |
| 2133                 | 75         | female        | Present                |                   | HC                     | HC           |                                    |
| 2134                 | 68         | male          | Present                |                   | HC                     | HC           |                                    |

| Sample number | Age | Gender | Smoking history | Pack years | Disease | Group | Stage (only tumor patients) |
|---------------|-----|--------|-----------------|------------|---------|-------|-----------------------------|
| 2135          | 77  | male   | Present         |            | HC      | HC    |                             |
| 2136          | 71  | female | Present         |            | HC      | HC    |                             |
| 2137          | 71  | male   | Present         |            | HC      | HC    |                             |
| 2138          | 52  | female | Yes             |            | HC      | HC    |                             |
| 2139          | 57  | male   | Yes             |            | HC      | HC    |                             |
| 2140          | 73  | female | Yes             |            | HC      | HC    |                             |
| 2141          | 41  | male   | Yes             |            | HC      | HC    |                             |
| 2142          | 63  | female | Yes             |            | HC      | HC    |                             |
| 2143          | 64  | female | Yes             |            | HC      | HC    |                             |
| 2144          | 61  | male   | Yes             |            | HC      | HC    |                             |
| 2145          | 50  | female | Yes             |            | HC      | HC    |                             |
| 2146          | 63  | female | Yes             |            | HC      | HC    |                             |
| 2147          | 79  | male   | Yes             |            | HC      | HC    |                             |
| 2148          | 61  | female | Yes             |            | HC      | HC    |                             |
| 2149          | 57  | male   | Yes             |            | HC      | HC    |                             |
| 2150          | 73  | female | Yes             |            | HC      | HC    |                             |
| 2151          | 55  | male   | Yes             |            | HC      | HC    |                             |
| 2152          | 56  | male   | Yes             |            | HC      | HC    |                             |
| 2153          | 49  | male   | Yes             |            | HC      | HC    |                             |
| 2154          | 51  | female | Yes             |            | HC      | HC    |                             |
| 2155          | 57  | male   | Yes             |            | HC      | HC    |                             |
| 2156          | 63  | female | Yes             |            | HC      | HC    |                             |
| 2157          | 90  | male   | Yes             |            | HC      | HC    |                             |
| 2158          | 49  | male   | Yes             |            | HC      | HC    |                             |
| 2159          | 52  | female | Yes             |            | HC      | HC    |                             |
| 2160          | 67  | male   | Yes             |            | HC      | HC    |                             |
| 2161          | 50  | male   | Yes             |            | HC      | HC    |                             |
| 2162          | 63  | male   | Yes             |            | HC      | HC    |                             |
| 2163          | 27  | male   | Yes             |            | HC      | HC    |                             |
| 2164          | 79  | female | Yes             |            | HC      | HC    |                             |
| 2165          | 59  | male   | Yes             |            | HC      | HC    |                             |
| 2166          | 57  | male   | Yes             |            | HC      | HC    |                             |
| 2167          | 61  | male   | Yes             |            | HC      | HC    |                             |
| 2168          | 73  | female | Yes             |            | HC      | HC    |                             |
| 2169          | 78  | female | Yes             |            | HC      | HC    |                             |
| 2170          | 71  | male   | Yes             |            | HC      | HC    |                             |
| 2171          | 41  | male   | Yes             |            | HC      | HC    |                             |



| Sample number | Age  | Gender | Smoking history | Pack years | Disease                    | Group | Stage (only tumor patients) |
|---------------|------|--------|-----------------|------------|----------------------------|-------|-----------------------------|
| 2172          | 39   | female | Yes             |            | Parkinson's Disease        | OD    |                             |
| 2173          | 53   | female | Yes             |            | HC                         | HC    |                             |
| 2174          | 78   | male   | Yes             |            | HC                         | HC    |                             |
| 2175          | 80   | male   | Yes             |            | HC                         | HC    |                             |
| 2176          | 47   | male   | Yes             |            | Parkinson's Disease        | OD    |                             |
| 2177          | 71   | male   | Yes             |            | HC                         | HC    |                             |
| 2178          | 87   | male   | Yes             |            | Parkinson's Disease        | OD    |                             |
| 2179          | 42   | male   | Yes             |            | Parkinson's Disease        | OD    |                             |
| 2180          | 45   | male   | Yes             |            | HC                         | HC    |                             |
| 2181          | 81   | male   | Yes             |            | HC                         | HC    |                             |
| 2182          | 53   | female | Yes             |            | Parkinson's Disease        | OD    |                             |
| 2183          | 77   | male   | Yes             |            | Parkinson's Disease        | OD    |                             |
| 2184          | 77   | male   | Yes             |            | HC                         | HC    |                             |
| 2185          | 71   | female | Yes             |            | Parkinson's Disease        | OD    |                             |
| 2186          | 75   | male   | Yes             |            | HC                         | HC    |                             |
| 2187          | 46   | female | Yes             |            | HC                         | HC    |                             |
| 2188          | 65   | female | Yes             |            | Parkinson's Disease        | OD    |                             |
| 2189          | 61   | male   | Yes             |            | HC                         | HC    |                             |
| 2190          | 41   | male   | Yes             |            | HC                         | HC    |                             |
| 2191          | 76   | female | Yes             |            | Parkinson's Disease        | OD    |                             |
| 2192          | 72   | female | Yes             |            | Parkinson's Disease        | OD    |                             |
| 2193          | 77   | male   | Yes             |            | HC                         | HC    |                             |
| 2194          | 67   | female | Yes             |            | HC                         | HC    |                             |
| 2195          | 77   | female | Yes             |            | Parkinson's Disease        | OD    |                             |
| 2196          | 53   | male   | Yes             |            | HC                         | HC    |                             |
| 2197          | 52   | male   | Yes             |            | Parkinson's Disease        | OD    |                             |
| 2198          | 47   | female | Yes             |            | HC                         | HC    |                             |
| 2199          | 71   | female | Yes             |            | HC                         | HC    |                             |
| 2200          | 70   | male   | Yes             |            | Parkinson's Disease        | OD    |                             |
| 2201          | 70   | male   | Yes             |            | Parkinson's Disease        | OD    |                             |
| 2202          | 53.1 | female |                 |            | Small Cell Lung Cancer     | LCa   | 4                           |
| 2203          | 66.3 | female |                 |            | other Lung Carcinoma       | LCa   | 4                           |
| 2204          | 64.1 | female |                 |            | Non-Small Cell Lung Cancer | LCa   | 2                           |
| 2205          | 63.5 | male   |                 |            | Non-Small Cell Lung Cancer | LCa   | 4                           |
| 2206          | 62.9 | male   |                 |            | Small Cell Lung Cancer     | LCa   | 4                           |
| 2207          | 60   | female |                 |            | Non-Small Cell Lung Cancer | LCa   | 4                           |

| <b>Sample number</b> | <b>Age</b> | <b>Gender</b> | <b>Smoking history</b> | <b>Pack years</b> | <b>Disease</b>             | <b>Group</b> | <b>Stage (only tumor patients)</b> |
|----------------------|------------|---------------|------------------------|-------------------|----------------------------|--------------|------------------------------------|
| 2208                 | 76.6       | male          |                        |                   | Small Cell Lung Cancer     | LCa          | 3                                  |
| 2209                 | 52         | female        |                        |                   | Non-Small Cell Lung Cancer | LCa          |                                    |
| 2210                 | 66.3       | male          |                        |                   | other Lung Carcinoma       | LCa          | 4                                  |
| 2211                 | 73.5       | female        |                        |                   | Non-Small Cell Lung Cancer | LCa          | 2                                  |
| 2212                 | 61.7       | male          |                        |                   | other Lung Carcinoma       | LCa          | 4                                  |
| 2213                 | 62.8       | male          |                        |                   | Small Cell Lung Cancer     | LCa          | 4                                  |
| 2214                 | 65         | male          |                        |                   | Non-Small Cell Lung Cancer | LCa          |                                    |
| 2215                 | 72.5       | female        |                        |                   | Non-Small Cell Lung Cancer | LCa          | 4                                  |
| 2216                 | 67         | female        |                        |                   | Non-Small Cell Lung Cancer | LCa          |                                    |
| 2217                 | 72.4       | male          |                        |                   | Non-Small Cell Lung Cancer | LCa          | 1                                  |
| 2218                 | 69.7       | female        |                        |                   | Non-Small Cell Lung Cancer | LCa          |                                    |
| 2219                 | 69.9       | male          |                        |                   | Non-Small Cell Lung Cancer | LCa          |                                    |
| 2220                 | 84.4       | male          |                        |                   | Non-Small Cell Lung Cancer | LCa          | 2                                  |
| 2221                 | 72.1       | male          |                        |                   | Non-Small Cell Lung Cancer | LCa          | 3                                  |
| 2222                 | 64.4       | male          |                        |                   | Non-Small Cell Lung Cancer | LCa          | 3                                  |
| 2223                 | 52         | male          |                        |                   | Non-Small Cell Lung Cancer | LCa          |                                    |
| 2224                 | 76         | male          |                        |                   | Non-Small Cell Lung Cancer | LCa          | 3                                  |
| 2225                 | 73.7       | male          |                        |                   | Non-Small Cell Lung Cancer | LCa          | 2                                  |
| 2226                 | 77.8       | male          |                        |                   | Non-Small Cell Lung Cancer | LCa          | 2                                  |
| 2227                 | 60.6       | male          |                        |                   | Non-Small Cell Lung Cancer | LCa          | 3                                  |
| 2228                 | 78.1       | male          |                        |                   | Non-Small Cell Lung Cancer | LCa          | 3                                  |
| 2229                 | 57.4       | male          |                        |                   | Non-Small Cell Lung Cancer | LCa          | 4                                  |
| 2230                 | 73.5       | female        |                        |                   | Non-Small Cell Lung Cancer | LCa          |                                    |
| 2231                 | 64.2       | male          |                        |                   | Non-Small Cell Lung Cancer | LCa          | 3                                  |
| 2232                 | 67.4       | male          |                        |                   | Non-Small Cell Lung Cancer | LCa          | 3                                  |
| 2233                 | 58.4       | female        |                        |                   | Non-Small Cell Lung Cancer | LCa          | 3                                  |

| Sample number | Age  | Gender | Smoking history | Pack years | Disease                    | Group | Stage (only tumor patients) |
|---------------|------|--------|-----------------|------------|----------------------------|-------|-----------------------------|
| 2234          | 55.6 | male   |                 |            | Non-Small Cell Lung Cancer | LCa   |                             |
| 2235          | 69.9 | female |                 |            | Non-Small Cell Lung Cancer | LCa   | 3                           |
| 2236          | 63.5 | male   |                 |            | Non-Small Cell Lung Cancer | LCa   | 3                           |
| 2237          | 72.1 | male   |                 |            | Non-Small Cell Lung Cancer | LCa   | 1                           |
| 2238          | 66.5 |        |                 |            | Small Cell Lung Cancer     | LCa   | 3                           |
| 2239          | 66.5 |        |                 |            | Small Cell Lung Cancer     | LCa   | 3                           |
| 2240          | 66.5 |        |                 |            | Small Cell Lung Cancer     | LCa   | 3                           |
| 2241          | 62.5 | female |                 |            | Small Cell Lung Cancer     | LCa   | 3                           |
| 2242          | 62.6 | female |                 |            | Small Cell Lung Cancer     | LCa   | 3                           |
| 2243          | 66   | male   |                 |            | Small Cell Lung Cancer     | LCa   | 4                           |
| 2244          | 66   | male   |                 |            | Small Cell Lung Cancer     | LCa   | 4                           |
| 2245          | 66.1 | male   |                 |            | Small Cell Lung Cancer     | LCa   | 4                           |
| 2246          | 54.7 | male   |                 |            | Non-Small Cell Lung Cancer | LCa   | 4                           |
| 2247          | 43.8 | male   |                 |            | Non-Small Cell Lung Cancer | LCa   | 4                           |
| 2248          | 62.6 | male   |                 |            | Non-Small Cell Lung Cancer | LCa   | 4                           |
| 2249          | 70.6 | female |                 |            | Small Cell Lung Cancer     | LCa   | 4                           |
| 2250          | 70.7 | female |                 |            | Small Cell Lung Cancer     | LCa   | 4                           |
| 2251          | 63.7 | male   |                 |            | Small Cell Lung Cancer     | LCa   |                             |
| 2252          | 63.8 | male   |                 |            | Small Cell Lung Cancer     | LCa   |                             |
| 2253          | 77.6 | female |                 |            | Small Cell Lung Cancer     | LCa   | 4                           |
| 2254          | 77.6 | female |                 |            | Small Cell Lung Cancer     | LCa   | 4                           |
| 2255          | 68.1 | male   |                 |            | Small Cell Lung Cancer     | LCa   |                             |
| 2256          | 55.6 | male   |                 |            | Small Cell Lung Cancer     | LCa   | 4                           |
| 2257          | 55.7 | male   |                 |            | Small Cell Lung Cancer     | LCa   | 4                           |
| 2258          | 70   | male   |                 |            | Small Cell Lung Cancer     | LCa   | 4                           |
| 2259          | 70   | male   |                 |            | Small Cell Lung Cancer     | LCa   | 4                           |
| 2260          | 70.1 | male   |                 |            | Small Cell Lung Cancer     | LCa   | 4                           |
| 2261          | 65.7 |        |                 |            | Small Cell Lung Cancer     | LCa   | 4                           |
| 2262          | 65.7 |        |                 |            | Small Cell Lung Cancer     | LCa   | 4                           |
| 2263          | 65.7 |        |                 |            | Small Cell Lung Cancer     | LCa   | 4                           |
| 2264          | 78   | male   |                 |            | Small Cell Lung Cancer     | LCa   |                             |
| 2265          | 67.8 |        |                 |            | Small Cell Lung Cancer     | LCa   | 3                           |
| 2266          | 67.8 |        |                 |            | Small Cell Lung Cancer     | LCa   | 3                           |
| 2267          | 67.8 |        |                 |            | Small Cell Lung Cancer     | LCa   | 3                           |

| Sample number | Age  | Gender | Smoking history | Pack years | Disease                    | Group | Stage (only tumor patients) |
|---------------|------|--------|-----------------|------------|----------------------------|-------|-----------------------------|
| 2268          | 53.7 | male   |                 |            | Small Cell Lung Cancer     | LCa   | 4                           |
| 2269          | 53.7 | male   |                 |            | Small Cell Lung Cancer     | LCa   | 4                           |
| 2270          | 67.4 | male   |                 |            | Small Cell Lung Cancer     | LCa   | 4                           |
| 2271          | 67.5 | male   |                 |            | Small Cell Lung Cancer     | LCa   | 4                           |
| 2272          | 67.4 | male   |                 |            | Small Cell Lung Cancer     | LCa   | 4                           |
| 2273          | 67.5 | male   |                 |            | Small Cell Lung Cancer     | LCa   | 4                           |
| 2274          | 57.4 | female |                 |            | Small Cell Lung Cancer     | LCa   | 4                           |
| 2275          | 69.6 | female |                 |            | Small Cell Lung Cancer     | LCa   | 4                           |
| 2276          | 69.6 | female |                 |            | Small Cell Lung Cancer     | LCa   | 4                           |
| 2277          | 69.7 | female |                 |            | Small Cell Lung Cancer     | LCa   | 4                           |
| 2278          | 66.4 | female |                 |            | Small Cell Lung Cancer     | LCa   | 4                           |
| 2279          | 66.5 | female |                 |            | Small Cell Lung Cancer     | LCa   | 4                           |
| 2280          | 66.5 | female |                 |            | Small Cell Lung Cancer     | LCa   | 4                           |
| 2281          | 63.3 | male   |                 |            | Small Cell Lung Cancer     | LCa   | 4                           |
| 2282          | 79.2 | male   |                 |            | Small Cell Lung Cancer     | LCa   | 4                           |
| 2283          | 59.8 |        |                 |            | Small Cell Lung Cancer     | LCa   | 4                           |
| 2284          | 59.8 |        |                 |            | Small Cell Lung Cancer     | LCa   | 4                           |
| 2285          | 59.8 |        |                 |            | Small Cell Lung Cancer     | LCa   | 4                           |
| 2286          | 68.9 | female |                 |            | Small Cell Lung Cancer     | LCa   |                             |
| 2287          | 66.1 | male   |                 |            | Non-Small Cell Lung Cancer | LCa   | 3                           |
| 2288          | 54.3 | male   |                 |            | Non-Small Cell Lung Cancer | LCa   | 3                           |
| 2289          | 75.1 | female |                 |            | other Lung Carcinoma       | LCa   | 3                           |
| 2290          | 59.5 | female |                 |            | Non-Small Cell Lung Cancer | LCa   | 3                           |
| 2291          | 54   | male   |                 |            | HC                         | HC    |                             |
| 2292          | 58   | male   |                 |            | HC                         | HC    |                             |
| 2293          | 57   | male   |                 |            | Heart Disease              | OD    |                             |
| 2294          | 55   | female |                 |            | HC                         | HC    |                             |
| 2295          | 70   | female |                 |            | Heart Disease              | OD    |                             |
| 2296          | 54   | male   |                 |            | Heart Disease              | OD    |                             |
| 2297          | 66   | female |                 |            | Heart Disease              | OD    |                             |
| 2298          | 64   | female |                 |            | Heart Disease              | OD    |                             |
| 2299          | 75   | female |                 |            | Heart Disease              | OD    |                             |
| 2300          | 80   | female |                 |            | Heart Disease              | OD    |                             |
| 2301          | 79   | male   |                 |            | Heart Disease              | OD    |                             |
| 2302          | 73   | male   |                 |            | HC                         | HC    |                             |
| 2303          | 49   | male   |                 |            | Heart Disease              | OD    |                             |

| <b>Sample number</b> | <b>Age</b> | <b>Gender</b> | <b>Smoking history</b> | <b>Pack years</b> | <b>Disease</b> | <b>Group</b> | <b>Stage (only tumor patients)</b> |
|----------------------|------------|---------------|------------------------|-------------------|----------------|--------------|------------------------------------|
| 2304                 | 65         | female        |                        |                   | Heart Disease  | OD           |                                    |
| 2305                 | 56         | male          |                        |                   | Heart Disease  | OD           |                                    |
| 2306                 | 79         | male          |                        |                   | Heart Disease  | OD           |                                    |
| 2307                 | 75         | male          |                        |                   | Heart Disease  | OD           |                                    |
| 2308                 | 71         | male          |                        |                   | Heart Disease  | OD           |                                    |
| 2309                 | 67         | female        |                        |                   | Heart Disease  | OD           |                                    |
| 2310                 | 79         | female        |                        |                   | HC             | HC           |                                    |
| 2311                 | 76         | female        |                        |                   | HC             | HC           |                                    |
| 2312                 | 64         | female        |                        |                   | HC             | HC           |                                    |
| 2313                 | 55         | female        |                        |                   | HC             | HC           |                                    |
| 2314                 | 48         | male          |                        |                   | HC             | HC           |                                    |
| 2315                 | 79         | male          |                        |                   | HC             | HC           |                                    |
| 2316                 | 63         | female        |                        |                   | HC             | HC           |                                    |
| 2317                 | 57         | female        |                        |                   | Heart Disease  | OD           |                                    |
| 2318                 | 49         | female        |                        |                   | HC             | HC           |                                    |
| 2319                 | 86         | male          |                        |                   | HC             | HC           |                                    |
| 2320                 | 73         | female        |                        |                   | Heart Disease  | OD           |                                    |
| 2321                 | 63         | male          |                        |                   | Heart Disease  | OD           |                                    |
| 2322                 | 38         | male          |                        |                   | Heart Disease  | OD           |                                    |
| 2323                 | 63         | male          |                        |                   | HC             | HC           |                                    |
| 2324                 | 80         | male          |                        |                   | Heart Disease  | OD           |                                    |
| 2325                 | 74         | male          |                        |                   | Heart Disease  | OD           |                                    |
| 2326                 | 79         | female        |                        |                   | Heart Disease  | OD           |                                    |
| 2327                 | 58         | male          |                        |                   | Heart Disease  | OD           |                                    |
| 2328                 | 80         | female        |                        |                   | Heart Disease  | OD           |                                    |
| 2329                 | 73         | male          |                        |                   | Heart Disease  | OD           |                                    |
| 2330                 | 69         | male          |                        |                   | Heart Disease  | OD           |                                    |
| 2331                 | 51         | male          |                        |                   | Heart Disease  | OD           |                                    |
| 2332                 | 63         | female        |                        |                   | Heart Disease  | OD           |                                    |
| 2333                 | 51         | male          |                        |                   | Heart Disease  | OD           |                                    |
| 2334                 | 63         | female        |                        |                   | Heart Disease  | OD           |                                    |
| 2335                 | 69         | male          |                        |                   | Heart Disease  | OD           |                                    |
| 2336                 | 82         | male          |                        |                   | Heart Disease  | OD           |                                    |
| 2337                 | 67         | male          |                        |                   | Heart Disease  | OD           |                                    |
| 2338                 | 85         | male          |                        |                   | Heart Disease  | OD           |                                    |
| 2339                 | 69         | male          |                        |                   | HC             | HC           |                                    |
| 2340                 | 76         | male          |                        |                   | Heart Disease  | OD           |                                    |

| Sample number | Age  | Gender | Smoking history | Pack years | Disease                    | Group | Stage (only tumor patients) |
|---------------|------|--------|-----------------|------------|----------------------------|-------|-----------------------------|
| 2341          | 82   | male   |                 |            | Heart Disease              | OD    |                             |
| 2342          | 67   | male   |                 |            | Heart Disease              | OD    |                             |
| 2343          | 47   | male   |                 |            | Heart Disease              | OD    |                             |
| 2344          | 79   | male   |                 |            | Heart Disease              | OD    |                             |
| 2345          | 70   | female |                 |            | Heart Disease              | OD    |                             |
| 2346          | 70   | male   |                 |            | Heart Disease              | OD    |                             |
| 2347          | 69   | female |                 |            | Heart Disease              | OD    |                             |
| 2348          | 60   | male   |                 |            | Heart Disease              | OD    |                             |
| 2349          | 32   | female |                 |            | Heart Disease              | OD    |                             |
| 2350          | 77   | female |                 |            | Heart Disease              | OD    |                             |
| 2351          | 78   | male   |                 |            | HC                         | HC    |                             |
| 2352          | 62   | male   |                 |            | HC                         | HC    |                             |
| 2353          | 22   | male   |                 |            | Heart Disease              | OD    |                             |
| 2354          | 76   | female |                 |            | Heart Disease              | OD    |                             |
| 2355          | 73   | female |                 |            | Heart Disease              | OD    |                             |
| 2356          | 55   | male   |                 |            | Heart Disease              | OD    |                             |
| 2357          | 77   | male   |                 |            | Heart Disease              | OD    |                             |
| 2358          | 66   | male   |                 |            | Heart Disease              | OD    |                             |
| 2359          | 83.6 | male   |                 |            | COPD                       | NULD  |                             |
| 2360          | 65.1 | male   |                 |            | NULD                       | NULD  |                             |
| 2361          | 71   | male   |                 |            | Non-Small Cell Lung Cancer | LCa   |                             |
| 2362          | 64.2 | male   |                 |            | other Lung Carcinoma       | LCa   |                             |
| 2363          | 64.2 | male   |                 |            | COPD                       | NULD  |                             |
| 2364          | 64.3 | female |                 |            | Small Cell Lung Cancer     | LCa   |                             |
| 2365          | 63.3 | male   |                 |            | NULD                       | NULD  |                             |
| 2366          | 53.4 | female |                 |            | Non-Small Cell Lung Cancer | LCa   |                             |
| 2367          | 81.1 | female |                 |            | NULD                       | NULD  |                             |
| 2368          | 69.2 | female |                 |            | COPD                       | NULD  |                             |
| 2369          | 88.6 | male   |                 |            | COPD                       | NULD  |                             |
| 2370          | 37   | male   |                 |            | NULD                       | NULD  |                             |
| 2371          | 63.7 | male   |                 |            | NULD                       | NULD  |                             |
| 2372          | 80.1 | male   |                 |            | COPD                       | NULD  |                             |
| 2373          | 66.3 | female |                 |            | COPD                       | NULD  |                             |
| 2374          | 62.3 | male   |                 |            | other Lung Carcinoma       | LCa   |                             |
| 2375          | 58.5 | female |                 |            | Non-Small Cell Lung Cancer | LCa   |                             |

| <b>Sample number</b> | <b>Age</b> | <b>Gender</b> | <b>Smoking history</b> | <b>Pack years</b> | <b>Disease</b>             | <b>Group</b> | <b>Stage (only tumor patients)</b> |
|----------------------|------------|---------------|------------------------|-------------------|----------------------------|--------------|------------------------------------|
| 2376                 | 59.2       | female        |                        |                   | Non-Small Cell Lung Cancer | LCa          |                                    |
| 2377                 | 47.8       | female        |                        |                   | other Lung Carcinoma       | LCa          |                                    |
| 2378                 | 48.3       | female        |                        |                   | other Lung Carcinoma       | LCa          |                                    |
| 2379                 | 48.6       | female        |                        |                   | other Lung Carcinoma       | LCa          |                                    |
| 2380                 | 49.1       | female        |                        |                   | other Lung Carcinoma       | LCa          |                                    |
| 2381                 | 68.9       | male          |                        |                   | Non-Small Cell Lung Cancer | LCa          |                                    |
| 2382                 | 69.2       | male          |                        |                   | Non-Small Cell Lung Cancer | LCa          |                                    |
| 2383                 | 69.4       | male          |                        |                   | Non-Small Cell Lung Cancer | LCa          |                                    |
| 2384                 | 69.6       | male          |                        |                   | Non-Small Cell Lung Cancer | LCa          |                                    |
| 2385                 | 69.9       | male          |                        |                   | Non-Small Cell Lung Cancer | LCa          |                                    |
| 2386                 | 70.2       | male          |                        |                   | Non-Small Cell Lung Cancer | LCa          |                                    |
| 2387                 | 67         | female        |                        |                   | Non-Small Cell Lung Cancer | LCa          |                                    |
| 2388                 | 67.3       | female        |                        |                   | Non-Small Cell Lung Cancer | LCa          |                                    |
| 2389                 | 67.9       | female        |                        |                   | Non-Small Cell Lung Cancer | LCa          |                                    |
| 2390                 | 68.5       | female        |                        |                   | Non-Small Cell Lung Cancer | LCa          |                                    |
| 2391                 | 74         | male          |                        |                   | Non-Small Cell Lung Cancer | LCa          |                                    |
| 2392                 | 74.3       | male          |                        |                   | Non-Small Cell Lung Cancer | LCa          |                                    |
| 2393                 | 74.6       | male          |                        |                   | Non-Small Cell Lung Cancer | LCa          |                                    |
| 2394                 | 74.8       | male          |                        |                   | Non-Small Cell Lung Cancer | LCa          |                                    |
| 2395                 | 72.1       | male          |                        |                   | Non-Small Cell Lung Cancer | LCa          |                                    |
| 2396                 | 72.5       | male          |                        |                   | Non-Small Cell Lung Cancer | LCa          |                                    |
| 2397                 | 73         | male          |                        |                   | Non-Small Cell Lung Cancer | LCa          |                                    |
| 2398                 | 60.7       | male          |                        |                   | Non-Small Cell Lung Cancer | LCa          |                                    |
| 2399                 | 60.9       | male          |                        |                   | Non-Small Cell Lung Cancer | LCa          |                                    |
| 2400                 | 61.2       | male          |                        |                   | Non-Small Cell Lung Cancer | LCa          |                                    |
| 2401                 | 78.1       | male          |                        |                   | Non-Small Cell Lung Cancer | LCa          |                                    |

| <b>Sample number</b> | <b>Age</b> | <b>Gender</b> | <b>Smoking history</b> | <b>Pack years</b> | <b>Disease</b>             | <b>Group</b> | <b>Stage (only tumor patients)</b> |
|----------------------|------------|---------------|------------------------|-------------------|----------------------------|--------------|------------------------------------|
| 2402                 | 78.3       | male          |                        |                   | Non-Small Cell Lung Cancer | LCa          |                                    |
| 2403                 | 78.6       | male          |                        |                   | Non-Small Cell Lung Cancer | LCa          |                                    |
| 2404                 | 78.8       | male          |                        |                   | Non-Small Cell Lung Cancer | LCa          |                                    |
| 2405                 | 79.1       | male          |                        |                   | Non-Small Cell Lung Cancer | LCa          |                                    |
| 2406                 | 72.5       | female        |                        |                   | Non-Small Cell Lung Cancer | LCa          |                                    |
| 2407                 | 73.2       | female        |                        |                   | Non-Small Cell Lung Cancer | LCa          |                                    |
| 2408                 | 73.8       | female        |                        |                   | Non-Small Cell Lung Cancer | LCa          |                                    |
| 2409                 | 85.1       | male          |                        |                   | Non-Small Cell Lung Cancer | LCa          |                                    |
| 2410                 | 85.4       | male          |                        |                   | Non-Small Cell Lung Cancer | LCa          |                                    |
| 2411                 | 85.7       | male          |                        |                   | Non-Small Cell Lung Cancer | LCa          |                                    |
| 2412                 | 64.1       | female        |                        |                   | Non-Small Cell Lung Cancer | LCa          |                                    |
| 2413                 | 64.8       | female        |                        |                   | Non-Small Cell Lung Cancer | LCa          |                                    |
| 2414                 | 65.1       | female        |                        |                   | Non-Small Cell Lung Cancer | LCa          |                                    |
| 2415                 | 65.3       | female        |                        |                   | Non-Small Cell Lung Cancer | LCa          |                                    |
| 2416                 | 65         | male          |                        |                   | Non-Small Cell Lung Cancer | LCa          |                                    |
| 2417                 | 76.1       | male          |                        |                   | Non-Small Cell Lung Cancer | LCa          |                                    |
| 2418                 | 76.5       | male          |                        |                   | Non-Small Cell Lung Cancer | LCa          |                                    |
| 2419                 | 63.3       | male          |                        |                   | Non-Small Cell Lung Cancer | LCa          |                                    |
| 2420                 | 63.7       | male          |                        |                   | Non-Small Cell Lung Cancer | LCa          |                                    |
| 2421                 | 52.5       | male          |                        |                   | Non-Small Cell Lung Cancer | LCa          |                                    |
| 2422                 | 52.8       | male          |                        |                   | Non-Small Cell Lung Cancer | LCa          |                                    |
| 2423                 | 53.2       | male          |                        |                   | Non-Small Cell Lung Cancer | LCa          |                                    |
| 2424                 | 56.4       | male          |                        |                   | Non-Small Cell Lung Cancer | LCa          |                                    |
| 2425                 | 56.9       | male          |                        |                   | Non-Small Cell Lung Cancer | LCa          |                                    |
| 2426                 | 74.3       | female        |                        |                   | Non-Small Cell Lung Cancer | LCa          |                                    |



| <b>Sample number</b> | <b>Age</b> | <b>Gender</b> | <b>Smoking history</b> | <b>Pack years</b> | <b>Disease</b>             | <b>Group</b> | <b>Stage (only tumor patients)</b> |
|----------------------|------------|---------------|------------------------|-------------------|----------------------------|--------------|------------------------------------|
| 2427                 | 74.6       | female        |                        |                   | Non-Small Cell Lung Cancer | LCa          |                                    |
| 2428                 | 74.9       | female        |                        |                   | Non-Small Cell Lung Cancer | LCa          |                                    |
| 2429                 | 86.2       | male          |                        |                   | Non-Small Cell Lung Cancer | LCa          |                                    |
| 2430                 | 86.5       | male          |                        |                   | Non-Small Cell Lung Cancer | LCa          |                                    |
| 2431                 | 54         | male          |                        |                   | Non-Small Cell Lung Cancer | LCa          |                                    |
| 2432                 | 50         | female        |                        |                   | other Lung Carcinoma       | LCa          |                                    |
| 2433                 | 57.6       | male          |                        |                   | Non-Small Cell Lung Cancer | LCa          |                                    |
| 2434                 | 57.9       | male          |                        |                   | Non-Small Cell Lung Cancer | LCa          |                                    |
| 2435                 | 66.7       | male          |                        |                   | Non-Small Cell Lung Cancer | LCa          |                                    |
| 2436                 | 66.7       | male          |                        |                   | Non-Small Cell Lung Cancer | LCa          |                                    |
| 2437                 | 64.6       | male          |                        |                   | Non-Small Cell Lung Cancer | LCa          |                                    |
| 2438                 | 64.8       | male          |                        |                   | Non-Small Cell Lung Cancer | LCa          |                                    |
| 2439                 | 65.7       | male          |                        |                   | Non-Small Cell Lung Cancer | LCa          |                                    |
| 2440                 | 66         | male          |                        |                   | Non-Small Cell Lung Cancer | LCa          |                                    |
| 2441                 | 66.6       | male          |                        |                   | Non-Small Cell Lung Cancer | LCa          |                                    |
| 2442                 | 63.6       | male          |                        |                   | Non-Small Cell Lung Cancer | LCa          |                                    |
| 2443                 | 64.2       | male          |                        |                   | Non-Small Cell Lung Cancer | LCa          |                                    |
| 2444                 | 67.7       | male          |                        |                   | Non-Small Cell Lung Cancer | LCa          |                                    |
| 2445                 | 69.2       | male          |                        |                   | Non-Small Cell Lung Cancer | LCa          |                                    |
| 2446                 | 59         | male          |                        |                   | Non-Small Cell Lung Cancer | LCa          |                                    |
| 2447                 | 59.9       | male          |                        |                   | Non-Small Cell Lung Cancer | LCa          |                                    |
| 2448                 | 60.1       | male          |                        |                   | Non-Small Cell Lung Cancer | LCa          |                                    |
| 2449                 | 52.4       | female        |                        |                   | Non-Small Cell Lung Cancer | LCa          |                                    |
| 2450                 | 52.7       | female        |                        |                   | Non-Small Cell Lung Cancer | LCa          |                                    |
| 2451                 | 53         | female        |                        |                   | Non-Small Cell Lung Cancer | LCa          |                                    |

| Sample number | Age  | Gender | Smoking history | Pack years | Disease                    | Group | Stage (only tumor patients) |
|---------------|------|--------|-----------------|------------|----------------------------|-------|-----------------------------|
| 2452          | 73.3 | male   |                 |            | Non-Small Cell Lung Cancer | LCa   |                             |
| 2453          | 73.8 | male   |                 |            | Non-Small Cell Lung Cancer | LCa   |                             |
| 2454          | 65.7 | female |                 |            | Non-Small Cell Lung Cancer | LCa   |                             |
| 2455          | 66   | female |                 |            | Non-Small Cell Lung Cancer | LCa   |                             |
| 2456          | 53.7 | male   |                 |            | Non-Small Cell Lung Cancer | LCa   |                             |
| 2457          | 65.1 | male   |                 |            | Non-Small Cell Lung Cancer | LCa   |                             |
| 2458          | 66.3 | male   |                 |            | Non-Small Cell Lung Cancer | LCa   |                             |
| 2459          | 66   | male   |                 |            | other Lung Carcinoma       | LCa   |                             |
| 2460          | 62   | female |                 |            | HC                         | HC    |                             |
| 2461          | 68   | female |                 |            | HC                         | HC    |                             |
| 2462          | 49   | female |                 |            | Parkinson's Disease        | OD    |                             |
| 2463          | 66   | female |                 |            | HC                         | HC    |                             |
| 2464          | 84   | female |                 |            | Parkinson's Disease        | OD    |                             |
| 2465          |      | female |                 |            | Endometriosis              | OD    |                             |
| 2466          | 42   | female |                 |            | Endometriosis              | OD    |                             |
| 2467          | 39   | female |                 |            | Endometriosis              | OD    |                             |
| 2468          | 26   | female |                 |            | HC                         | HC    |                             |
| 2469          | 28   | female |                 |            | Endometriosis              | OD    |                             |
| 2470          | 21   | female |                 |            | HC                         | HC    |                             |
| 2471          | 26   | female |                 |            | Endometriosis              | OD    |                             |
| 2472          | 27   | female |                 |            | HC                         | HC    |                             |
| 2473          | 46   | female |                 |            | Endometriosis              | OD    |                             |
| 2474          | 45   | female |                 |            | HC                         | HC    |                             |
| 2475          | 23   | female |                 |            | Endometriosis              | OD    |                             |
| 2476          | 53   | female |                 |            | HC                         | HC    |                             |
| 2477          | 30   | female |                 |            | Endometriosis              | OD    |                             |
| 2478          | 39   | female |                 |            | HC                         | HC    |                             |
| 2479          | 40   | female |                 |            | Endometriosis              | OD    |                             |
| 2480          | 36   | female |                 |            | HC                         | HC    |                             |
| 2481          | 49   | female |                 |            | Endometriosis              | OD    |                             |
| 2482          | 36   | female |                 |            | HC                         | HC    |                             |
| 2483          | 36   | female |                 |            | Endometriosis              | OD    |                             |
| 2484          | 32   | female |                 |            | HC                         | HC    |                             |
| 2485          | 39   | female |                 |            | Endometriosis              | OD    |                             |

| Sample number | Age | Gender | Smoking history | Pack years | Disease       | Group | Stage (only tumor patients) |
|---------------|-----|--------|-----------------|------------|---------------|-------|-----------------------------|
| 2486          | 36  | female |                 |            | HC            | HC    |                             |
| 2487          | 33  | female |                 |            | Endometriosis | OD    |                             |
| 2488          | 51  | female |                 |            | HC            | HC    |                             |
| 2489          | 30  | female |                 |            | Endometriosis | OD    |                             |
| 2490          | 49  | female |                 |            | HC            | HC    |                             |
| 2491          |     | female |                 |            | Endometriosis | OD    |                             |
| 2492          | 38  | female |                 |            | Endometriosis | OD    |                             |
| 2493          | 46  | female |                 |            | HC            | HC    |                             |
| 2494          | 37  | female |                 |            | HC            | HC    |                             |
| 2495          | 36  | female |                 |            | Endometriosis | OD    |                             |
| 2496          | 42  | female |                 |            | Endometriosis | OD    |                             |
| 2497          |     | female |                 |            | HC            | HC    |                             |
| 2498          | 32  | female |                 |            | Endometriosis | OD    |                             |
| 2499          |     | female |                 |            | Endometriosis | OD    |                             |
| 2500          | 48  | female |                 |            | HC            | HC    |                             |
| 2501          |     | female |                 |            | HC            | HC    |                             |
| 2502          |     | female |                 |            | Endometriosis | OD    |                             |
| 2503          |     | female |                 |            | Endometriosis | OD    |                             |
| 2504          |     | female |                 |            | Endometriosis | OD    |                             |
| 2505          |     | female |                 |            | Endometriosis | OD    |                             |
| 2506          |     | female |                 |            | Endometriosis | OD    |                             |
| 2507          |     | female |                 |            | HC            | HC    |                             |
| 2508          |     | female |                 |            | Endometriosis | OD    |                             |
| 2509          |     | female |                 |            | Endometriosis | OD    |                             |
| 2510          |     | female |                 |            | Endometriosis | OD    |                             |
| 2511          |     | female |                 |            | HC            | HC    |                             |
| 2512          |     | female |                 |            | HC            | HC    |                             |
| 2513          |     | female |                 |            | Endometriosis | OD    |                             |
| 2514          |     | female |                 |            | Endometriosis | OD    |                             |
| 2515          |     | female |                 |            | Endometriosis | OD    |                             |
| 2516          |     | female |                 |            | HC            | HC    |                             |
| 2517          |     | female |                 |            | HC            | HC    |                             |
| 2518          |     | female |                 |            | Endometriosis | OD    |                             |
| 2519          |     | female |                 |            | Endometriosis | OD    |                             |
| 2520          |     | female |                 |            | HC            | HC    |                             |
| 2521          |     | female |                 |            | HC            | HC    |                             |
| 2522          |     | female |                 |            | HC            | HC    |                             |

| Sample number | Age | Gender | Smoking history | Pack years | Disease       | Group | Stage (only tumor patients) |
|---------------|-----|--------|-----------------|------------|---------------|-------|-----------------------------|
| 2523          |     | female |                 |            | HC            | HC    |                             |
| 2524          |     | female |                 |            | Endometriosis | OD    |                             |
| 2525          |     | female |                 |            | HC            | HC    |                             |
| 2526          |     | female |                 |            | Endometriosis | OD    |                             |
| 2527          |     | female |                 |            | Endometriosis | OD    |                             |
| 2528          |     | female |                 |            | Endometriosis | OD    |                             |
| 2529          |     | female |                 |            | HC            | HC    |                             |
| 2530          |     | female |                 |            | HC            | HC    |                             |
| 2531          |     | female |                 |            | Endometriosis | OD    |                             |
| 2532          |     | female |                 |            | HC            | HC    |                             |
| 2533          |     | female |                 |            | HC            | HC    |                             |
| 2534          |     | female |                 |            | Endometriosis | OD    |                             |
| 2535          |     | female |                 |            | Endometriosis | OD    |                             |
| 2536          |     | female |                 |            | HC            | HC    |                             |
| 2537          |     | female |                 |            | Endometriosis | OD    |                             |
| 2538          |     | female |                 |            | HC            | HC    |                             |
| 2539          | 51  | female |                 |            | Breast Cancer | OD    |                             |
| 2540          | 63  | female |                 |            | HC            | HC    |                             |
| 2541          | 38  | female |                 |            | Breast Cancer | OD    |                             |
| 2542          | 71  | female |                 |            | HC            | HC    |                             |
| 2543          | 38  | female |                 |            | Breast Cancer | OD    |                             |
| 2544          | 64  | female |                 |            | Breast Cancer | OD    |                             |
| 2545          | 51  | female |                 |            | Breast Cancer | OD    |                             |
| 2546          | 66  | female |                 |            | Breast Cancer | OD    |                             |
| 2547          | 61  | female |                 |            | Breast Cancer | OD    |                             |
| 2548          | 64  | female |                 |            | Breast Cancer | OD    |                             |
| 2549          | 43  | female |                 |            | Breast Cancer | OD    |                             |
| 2550          | 49  | female |                 |            | HC            | HC    |                             |
| 2551          | 72  | female |                 |            | HC            | HC    |                             |
| 2552          | 43  | female |                 |            | HC            | HC    |                             |
| 2553          | 62  | female |                 |            | Breast Cancer | OD    |                             |
| 2554          | 71  | female |                 |            | Breast Cancer | OD    |                             |
| 2555          | 64  | female |                 |            | HC            | HC    |                             |
| 2556          | 66  | female |                 |            | Breast Cancer | OD    |                             |
| 2557          | 66  | female |                 |            | HC            | HC    |                             |
| 2558          | 65  | female |                 |            | HC            | HC    |                             |
| 2559          | 61  | female |                 |            | Breast Cancer | OD    |                             |

| <b>Sample number</b> | <b>Age</b> | <b>Gender</b> | <b>Smoking history</b> | <b>Pack years</b> | <b>Disease</b> | <b>Group</b> | <b>Stage (only tumor patients)</b> |
|----------------------|------------|---------------|------------------------|-------------------|----------------|--------------|------------------------------------|
| 2560                 | 66         | female        |                        |                   | Breast Cancer  | OD           |                                    |
| 2561                 | 71         | female        |                        |                   | Breast Cancer  | OD           |                                    |
| 2562                 | 62         | female        |                        |                   | Breast Cancer  | OD           |                                    |
| 2563                 | 66         | female        |                        |                   | Breast Cancer  | OD           |                                    |
| 2564                 | 53         | female        |                        |                   | HC             | HC           |                                    |
| 2565                 | 66         | female        |                        |                   | HC             | HC           |                                    |
| 2566                 | 29         | female        |                        |                   | Breast Cancer  | OD           |                                    |
| 2567                 | 68         | female        |                        |                   | HC             | HC           |                                    |
| 2568                 | 48         | female        |                        |                   | Breast Cancer  | OD           |                                    |
| 2569                 | 29         | female        |                        |                   | Breast Cancer  | OD           |                                    |
| 2570                 | 66         | female        |                        |                   | Breast Cancer  | OD           |                                    |
| 2571                 | 29         | female        |                        |                   | HC             | HC           |                                    |
| 2572                 | 55         | female        |                        |                   | Breast Cancer  | OD           |                                    |
| 2573                 | 51         | female        |                        |                   | HC             | HC           |                                    |
| 2574                 | 38         | female        |                        |                   | HC             | HC           |                                    |
| 2575                 | 48         | female        |                        |                   | Breast Cancer  | OD           |                                    |
| 2576                 | 60         | female        |                        |                   | HC             | HC           |                                    |
| 2577                 | 39         | female        |                        |                   | HC             | HC           |                                    |
| 2578                 | 66         | female        |                        |                   | Breast Cancer  | OD           |                                    |
| 2579                 | 69         | female        |                        |                   | HC             | HC           |                                    |
| 2580                 | 65         | female        |                        |                   | HC             | HC           |                                    |
| 2581                 | 58         | female        |                        |                   | HC             | HC           |                                    |
| 2582                 | 43         | female        |                        |                   | Breast Cancer  | OD           |                                    |
| 2583                 | 66         | female        |                        |                   | Breast Cancer  | OD           |                                    |
| 2584                 | 71         | female        |                        |                   | Breast Cancer  | OD           |                                    |
| 2585                 | 71         | female        |                        |                   | HC             | HC           |                                    |
| 2586                 | 58         | female        |                        |                   | Breast Cancer  | OD           |                                    |
| 2587                 | 72         | female        |                        |                   | Breast Cancer  | OD           |                                    |
| 2588                 | 70         | female        |                        |                   | Breast Cancer  | OD           |                                    |
| 2589                 | 55         | female        |                        |                   | Breast Cancer  | OD           |                                    |
| 2590                 | 39         | female        |                        |                   | Breast Cancer  | OD           |                                    |
| 2591                 | 64         | female        |                        |                   | Breast Cancer  | OD           |                                    |
| 2592                 | 66         | female        |                        |                   | Breast Cancer  | OD           |                                    |
| 2593                 | 67         | female        |                        |                   | Breast Cancer  | OD           |                                    |
| 2594                 | 58         | female        |                        |                   | Breast Cancer  | OD           |                                    |
| 2595                 | 71         | female        |                        |                   | Breast Cancer  | OD           |                                    |
| 2596                 | 72         | female        |                        |                   | Breast Cancer  | OD           |                                    |

| Sample number | Age | Gender | Smoking history | Pack years | Disease                | Group | Stage (only tumor patients) |
|---------------|-----|--------|-----------------|------------|------------------------|-------|-----------------------------|
| 2597          | 70  | female |                 |            | Breast Cancer          | OD    |                             |
| 2598          | 64  | female |                 |            | Breast Cancer          | OD    |                             |
| 2599          | 39  | female |                 |            | Breast Cancer          | OD    |                             |
| 2600          | 65  | female |                 |            | HC                     | HC    |                             |
| 2601          | 67  | female |                 |            | Breast Cancer          | OD    |                             |
| 2602          |     |        |                 |            | COPD                   | NULD  |                             |
| 2603          |     |        |                 |            | COPD                   | NULD  |                             |
| 2604          |     |        |                 |            | COPD                   | NULD  |                             |
| 2605          |     |        |                 |            | COPD                   | NULD  |                             |
| 2606          | 39  | male   |                 |            | Small Cell Lung Cancer | LCa   |                             |
| 2607          | 39  | male   |                 |            | Small Cell Lung Cancer | LCa   |                             |
| 2608          | 73  | male   |                 |            | Small Cell Lung Cancer | LCa   |                             |
| 2609          | 60  | male   |                 |            | Small Cell Lung Cancer | LCa   |                             |
| 2610          | 60  | male   |                 |            | Small Cell Lung Cancer | LCa   |                             |
| 2611          | 60  | male   |                 |            | Small Cell Lung Cancer | LCa   |                             |
| 2612          | 49  | male   |                 |            | Small Cell Lung Cancer | LCa   |                             |
| 2613          | 57  | male   |                 |            | Small Cell Lung Cancer | LCa   |                             |
| 2614          | 71  | female |                 |            | Small Cell Lung Cancer | LCa   |                             |
| 2615          | 71  | female |                 |            | Small Cell Lung Cancer | LCa   |                             |
| 2616          | 71  | female |                 |            | Small Cell Lung Cancer | LCa   |                             |
| 2617          | 71  | female |                 |            | Small Cell Lung Cancer | LCa   |                             |
| 2618          | 71  | female |                 |            | Small Cell Lung Cancer | LCa   |                             |
| 2619          | 71  | female |                 |            | Small Cell Lung Cancer | LCa   |                             |
| 2620          | 62  | male   |                 |            | Small Cell Lung Cancer | LCa   |                             |
| 2621          | 62  | male   |                 |            | Small Cell Lung Cancer | LCa   |                             |
| 2622          | 62  | male   |                 |            | Small Cell Lung Cancer | LCa   |                             |
| 2623          | 39  | male   |                 |            | Small Cell Lung Cancer | LCa   |                             |
| 2624          | 58  |        |                 |            | Sepsis                 | OD    |                             |
| 2625          | 58  |        |                 |            | Sepsis                 | OD    |                             |
| 2626          | 73  |        |                 |            | Sepsis                 | OD    |                             |
| 2627          | 73  |        |                 |            | Sepsis                 | OD    |                             |
| 2628          | 73  |        |                 |            | Sepsis                 | OD    |                             |
| 2629          | 73  |        |                 |            | Sepsis                 | OD    |                             |
| 2630          | 45  |        |                 |            | Sepsis                 | OD    |                             |
| 2631          | 45  |        |                 |            | Sepsis                 | OD    |                             |
| 2632          | 69  |        |                 |            | Sepsis                 | OD    |                             |
| 2633          | 69  |        |                 |            | Sepsis                 | OD    |                             |

| <b>Sample number</b> | <b>Age</b> | <b>Gender</b> | <b>Smoking history</b> | <b>Pack years</b> | <b>Disease</b> | <b>Group</b> | <b>Stage (only tumor patients)</b> |
|----------------------|------------|---------------|------------------------|-------------------|----------------|--------------|------------------------------------|
| 2634                 | 56         |               |                        |                   | Sepsis         | OD           |                                    |
| 2635                 | 56         |               |                        |                   | Sepsis         | OD           |                                    |
| 2636                 | 58         |               |                        |                   | Sepsis         | OD           |                                    |
| 2637                 | 58         |               |                        |                   | Sepsis         | OD           |                                    |
| 2638                 | 48         |               |                        |                   | Sepsis         | OD           |                                    |
| 2639                 | 48         |               |                        |                   | Sepsis         | OD           |                                    |
| 2640                 | 62         |               |                        |                   | Sepsis         | OD           |                                    |
| 2641                 | 62         |               |                        |                   | Sepsis         | OD           |                                    |
| 2642                 | 77         |               |                        |                   | Sepsis         | OD           |                                    |
| 2643                 | 77         |               |                        |                   | Sepsis         | OD           |                                    |
| 2644                 | 66         |               |                        |                   | Sepsis         | OD           |                                    |
| 2645                 | 66         |               |                        |                   | Sepsis         | OD           |                                    |
| 2646                 | 71         |               |                        |                   | Sepsis         | OD           |                                    |
| 2647                 | 71         |               |                        |                   | Sepsis         | OD           |                                    |
| 2648                 | 64         |               |                        |                   | Sepsis         | OD           |                                    |
| 2649                 | 64         |               |                        |                   | Sepsis         | OD           |                                    |
| 2650                 | 64         |               |                        |                   | Sepsis         | OD           |                                    |
| 2651                 | 34         |               |                        |                   | Sepsis         | OD           |                                    |
| 2652                 | 34         |               |                        |                   | Sepsis         | OD           |                                    |
| 2653                 | 63         |               |                        |                   | Sepsis         | OD           |                                    |
| 2654                 | 63         |               |                        |                   | Sepsis         | OD           |                                    |
| 2655                 | 63         |               |                        |                   | Sepsis         | OD           |                                    |
| 2656                 | 78         |               |                        |                   | Sepsis         | OD           |                                    |
| 2657                 | 78         |               |                        |                   | Sepsis         | OD           |                                    |
| 2658                 | 49         |               |                        |                   | Sepsis         | OD           |                                    |
| 2659                 | 49         |               |                        |                   | Sepsis         | OD           |                                    |
| 2660                 | 57         |               |                        |                   | Sepsis         | OD           |                                    |
| 2661                 | 57         |               |                        |                   | Sepsis         | OD           |                                    |
| 2662                 | 64         |               |                        |                   | Sepsis         | OD           |                                    |
| 2663                 | 64         |               |                        |                   | Sepsis         | OD           |                                    |
| 2664                 | 64         |               |                        |                   | Sepsis         | OD           |                                    |
| 2665                 | 64         |               |                        |                   | Sepsis         | OD           |                                    |
| 2666                 | 64         |               |                        |                   | Sepsis         | OD           |                                    |
| 2667                 | 34         |               |                        |                   | Sepsis         | OD           |                                    |
| 2668                 | 65         |               |                        |                   | Sepsis         | OD           |                                    |
| 2669                 | 65         |               |                        |                   | Sepsis         | OD           |                                    |
| 2670                 | 64         |               |                        |                   | Sepsis         | OD           |                                    |

| <b>Sample number</b> | <b>Age</b> | <b>Gender</b> | <b>Smoking history</b> | <b>Pack years</b> | <b>Disease</b> | <b>Group</b> | <b>Stage (only tumor patients)</b> |
|----------------------|------------|---------------|------------------------|-------------------|----------------|--------------|------------------------------------|
| 2671                 | 64         |               |                        |                   | Sepsis         | OD           |                                    |
| 2672                 | 71         |               |                        |                   | Sepsis         | OD           |                                    |
| 2673                 | 71         |               |                        |                   | Sepsis         | OD           |                                    |
| 2674                 | 54         |               |                        |                   | Sepsis         | OD           |                                    |
| 2675                 | 54         |               |                        |                   | Sepsis         | OD           |                                    |
| 2676                 | 58         |               |                        |                   | Sepsis         | OD           |                                    |
| 2677                 | 58         |               |                        |                   | Sepsis         | OD           |                                    |
| 2678                 | 66         |               |                        |                   | Sepsis         | OD           |                                    |
| 2679                 | 66         |               |                        |                   | Sepsis         | OD           |                                    |
| 2680                 | 51         |               |                        |                   | Sepsis         | OD           |                                    |
| 2681                 | 51         |               |                        |                   | Sepsis         | OD           |                                    |
| 2682                 | 76         |               |                        |                   | Sepsis         | OD           |                                    |
| 2683                 | 76         |               |                        |                   | Sepsis         | OD           |                                    |
| 2684                 | 76         |               |                        |                   | Sepsis         | OD           |                                    |
| 2685                 | 52         |               |                        |                   | Sepsis         | OD           |                                    |
| 2686                 | 52         |               |                        |                   | Sepsis         | OD           |                                    |
| 2687                 | 52         |               |                        |                   | Sepsis         | OD           |                                    |
| 2688                 | 74         |               |                        |                   | Sepsis         | OD           |                                    |
| 2689                 | 74         |               |                        |                   | Sepsis         | OD           |                                    |
| 2690                 | 69         |               |                        |                   | Sepsis         | OD           |                                    |
| 2691                 | 77         |               |                        |                   | Sepsis         | OD           |                                    |
| 2692                 | 77         |               |                        |                   | Sepsis         | OD           |                                    |
| 2693                 | 67         |               |                        |                   | Sepsis         | OD           |                                    |
| 2694                 | 54         |               |                        |                   | Sepsis         | OD           |                                    |
| 2695                 | 54         |               |                        |                   | Sepsis         | OD           |                                    |
| 2696                 | 79         |               |                        |                   | Sepsis         | OD           |                                    |
| 2697                 | 79         |               |                        |                   | Sepsis         | OD           |                                    |
| 2698                 | 66         |               |                        |                   | Sepsis         | OD           |                                    |
| 2699                 | 66         |               |                        |                   | Sepsis         | OD           |                                    |
| 2700                 | 84         |               |                        |                   | Sepsis         | OD           |                                    |
| 2701                 | 84         |               |                        |                   | Sepsis         | OD           |                                    |
| 2702                 | 56         |               |                        |                   | Sepsis         | OD           |                                    |
| 2703                 | 56         |               |                        |                   | Sepsis         | OD           |                                    |
| 2704                 | 54         |               |                        |                   | Sepsis         | OD           |                                    |
| 2705                 | 54         |               |                        |                   | Sepsis         | OD           |                                    |
| 2706                 | 67         |               |                        |                   | Sepsis         | OD           |                                    |
| 2707                 | 34         |               |                        |                   | Sepsis         | OD           |                                    |



| Sample number | Age | Gender | Smoking history | Pack years | Disease | Group | Stage (only tumor patients) |
|---------------|-----|--------|-----------------|------------|---------|-------|-----------------------------|
| 2708          | 54  |        |                 |            | Sepsis  | OD    |                             |
| 2709          | 54  |        |                 |            | Sepsis  | OD    |                             |
| 2710          | 67  |        |                 |            | Sepsis  | OD    |                             |
| 2711          | 67  |        |                 |            | Sepsis  | OD    |                             |
| 2712          | 58  |        |                 |            | Sepsis  | OD    |                             |
| 2713          | 58  |        |                 |            | Sepsis  | OD    |                             |
| 2714          | 46  |        |                 |            | Sepsis  | OD    |                             |
| 2715          | 46  |        |                 |            | Sepsis  | OD    |                             |
| 2716          | 48  |        |                 |            | Sepsis  | OD    |                             |
| 2717          | 48  |        |                 |            | Sepsis  | OD    |                             |
| 2718          | 53  |        |                 |            | Sepsis  | OD    |                             |
| 2719          | 53  |        |                 |            | Sepsis  | OD    |                             |
| 2720          | 47  | male   |                 |            | HC      | HC    |                             |
| 2721          | 47  | male   |                 |            | HC      | HC    |                             |
| 2722          | 33  | male   |                 |            | HC      | HC    |                             |
| 2723          | 27  | male   |                 |            | HC      | HC    |                             |
| 2724          | 41  | male   |                 |            | HC      | HC    |                             |
| 2725          | 41  | male   |                 |            | HC      | HC    |                             |
| 2726          | 42  | female |                 |            | HC      | HC    |                             |
| 2727          | 42  | female |                 |            | HC      | HC    |                             |
| 2728          | 29  | female |                 |            | HC      | HC    |                             |
| 2729          | 26  | female |                 |            | HC      | HC    |                             |
| 2730          | 64  | female |                 |            | HC      | HC    |                             |
| 2731          | 64  | female |                 |            | HC      | HC    |                             |
| 2732          | 47  | female |                 |            | HC      | HC    |                             |
| 2733          | 47  | female |                 |            | HC      | HC    |                             |
| 2734          | 63  | male   |                 |            | HC      | HC    |                             |
| 2735          | 63  | male   |                 |            | HC      | HC    |                             |
| 2736          | 60  | female |                 |            | HC      | HC    |                             |
| 2737          | 18  | male   |                 |            | HC      | HC    |                             |
| 2738          | 73  | male   |                 |            | HC      | HC    |                             |
| 2739          | 73  | male   |                 |            | HC      | HC    |                             |
| 2740          | 57  | female |                 |            | HC      | HC    |                             |
| 2741          | 57  | female |                 |            | HC      | HC    |                             |
| 2742          | 39  | male   |                 |            | HC      | HC    |                             |
| 2743          | 39  | male   |                 |            | HC      | HC    |                             |
| 2744          |     | female |                 |            | HC      | HC    |                             |

| Sample number | Age | Gender | Smoking history | Pack years | Disease                    | Group | Stage (only tumor patients) |
|---------------|-----|--------|-----------------|------------|----------------------------|-------|-----------------------------|
| 2745          | 62  | female |                 |            | HC                         | HC    |                             |
| 2746          |     | female |                 |            | HC                         | HC    |                             |
| 2747          |     | female |                 |            | HC                         | HC    |                             |
| 2748          | 28  | female |                 |            | HC                         | HC    |                             |
| 2749          | 23  | male   |                 |            | HC                         | HC    |                             |
| 2750          | 22  | male   |                 |            | HC                         | HC    |                             |
| 2751          | 25  | male   |                 |            | HC                         | HC    |                             |
| 2752          | 31  | female |                 |            | HC                         | HC    |                             |
| 2753          | 22  | male   |                 |            | HC                         | HC    |                             |
| 2754          | 33  | female |                 |            | HC                         | HC    |                             |
| 2755          | 56  | male   |                 |            | HC                         | HC    |                             |
| 2756          | 56  | male   |                 |            | HC                         | HC    |                             |
| 2757          | 32  | female |                 |            | HC                         | HC    |                             |
| 2758          | 45  | female |                 |            | HC                         | HC    |                             |
| 2759          | 39  | male   |                 |            | HC                         | HC    |                             |
| 2760          | 55  | male   |                 |            | HC                         | HC    |                             |
| 2761          | 31  | female |                 |            | HC                         | HC    |                             |
| 2762          | 49  | female |                 |            | HC                         | HC    |                             |
| 2763          | 48  | female |                 |            | HC                         | HC    |                             |
| 2764          | 63  | female |                 |            | Non-Small Cell Lung Cancer | LCa   | 4                           |
| 2765          | 73  | male   |                 |            | Non-Small Cell Lung Cancer | LCa   | 3                           |
| 2766          | 72  | male   |                 |            | Non-Small Cell Lung Cancer | LCa   | 4                           |
| 2767          | 60  | female |                 |            | Small Cell Lung Cancer     | LCa   | 3                           |
| 2768          | 77  | male   |                 |            | Non-Small Cell Lung Cancer | LCa   | 2                           |
| 2769          | 84  | male   |                 |            | Non-Small Cell Lung Cancer | LCa   | 4                           |
| 2770          | 61  | male   |                 |            | Non-Small Cell Lung Cancer | LCa   | 3                           |
| 2771          | 67  | male   |                 |            | Non-Small Cell Lung Cancer | LCa   | 4                           |
| 2772          | 62  | male   |                 |            | Non-Small Cell Lung Cancer | LCa   | 4                           |
| 2773          | 80  | female |                 |            | Non-Small Cell Lung Cancer | LCa   | 3                           |
| 2774          | 61  | female |                 |            | Non-Small Cell Lung Cancer | LCa   | 3                           |
| 2775          | 61  | male   |                 |            | Non-Small Cell Lung Cancer | LCa   | 3                           |

| Sample number | Age | Gender | Smoking history | Pack years | Disease                    | Group | Stage (only tumor patients) |
|---------------|-----|--------|-----------------|------------|----------------------------|-------|-----------------------------|
| 2776          | 78  | male   |                 |            | Non-Small Cell Lung Cancer | LCa   | 4                           |
| 2777          | 46  | female |                 |            | Small Cell Lung Cancer     | LCa   | 4                           |
| 2778          | 62  | female |                 |            | Non-Small Cell Lung Cancer | LCa   | 4                           |
| 2779          | 60  | female |                 |            | Small Cell Lung Cancer     | LCa   | 3                           |
| 2780          | 64  | male   |                 |            | Non-Small Cell Lung Cancer | LCa   | 2                           |
| 2781          | 60  | male   |                 |            | Non-Small Cell Lung Cancer | LCa   | 1                           |
| 2782          | 64  | male   |                 |            | Non-Small Cell Lung Cancer | LCa   | 2                           |
| 2783          | 70  | male   |                 |            | Non-Small Cell Lung Cancer | LCa   | 4                           |
| 2784          | 73  | male   |                 |            | Small Cell Lung Cancer     | LCa   | 4                           |
| 2785          | 65  | male   |                 |            | Non-Small Cell Lung Cancer | LCa   |                             |
| 2786          | 78  | male   |                 |            | Small Cell Lung Cancer     | LCa   | 4                           |
| 2787          | 51  | female |                 |            | Non-Small Cell Lung Cancer | LCa   | 4                           |
| 2788          | 73  | male   |                 |            | Non-Small Cell Lung Cancer | LCa   |                             |
| 2789          | 80  | male   |                 |            | Small Cell Lung Cancer     | LCa   |                             |
| 2790          | 78  | female |                 |            | Non-Small Cell Lung Cancer | LCa   | 4                           |
| 2791          | 49  | male   |                 |            | Small Cell Lung Cancer     | LCa   | 3                           |
| 2792          | 71  | male   |                 |            | Small Cell Lung Cancer     | LCa   | 3                           |
| 2793          | 35  | female |                 |            | Non-Small Cell Lung Cancer | LCa   | 2                           |
| 2794          | 67  | male   |                 |            | Small Cell Lung Cancer     | LCa   | 4                           |
| 2795          | 69  | male   |                 |            | Non-Small Cell Lung Cancer | LCa   | 1                           |
| 2796          | 70  | male   |                 |            | Non-Small Cell Lung Cancer | LCa   | 3                           |
| 2797          | 70  | male   |                 |            | Non-Small Cell Lung Cancer | LCa   | 3                           |
| 2798          | 62  | male   |                 |            | Non-Small Cell Lung Cancer | LCa   | 4                           |
| 2799          | 80  | male   |                 |            | Non-Small Cell Lung Cancer | LCa   | 1                           |
| 2800          | 57  | male   |                 |            | Small Cell Lung Cancer     | LCa   | 4                           |
| 2801          | 74  | male   |                 |            | Small Cell Lung Cancer     | LCa   | 4                           |
| 2802          | 60  | male   |                 |            | Non-Small Cell Lung Cancer | LCa   | 4                           |
| 2803          | 63  | male   |                 |            | Non-Small Cell Lung Cancer | LCa   | 3                           |

| Sample number | Age | Gender | Smoking history | Pack years | Disease                    | Group | Stage (only tumor patients) |
|---------------|-----|--------|-----------------|------------|----------------------------|-------|-----------------------------|
| 2804          | 61  | female |                 |            | Non-Small Cell Lung Cancer | LCa   | 4                           |
| 2805          | 65  | male   |                 |            | Non-Small Cell Lung Cancer | LCa   | 2                           |
| 2806          | 79  | male   |                 |            | Non-Small Cell Lung Cancer | LCa   | 4                           |
| 2807          | 63  | male   |                 |            | Small Cell Lung Cancer     | LCa   | 4                           |
| 2808          | 60  | male   |                 |            | Non-Small Cell Lung Cancer | LCa   | 3                           |
| 2809          | 52  | male   |                 |            | Non-Small Cell Lung Cancer | LCa   | 4                           |
| 2810          | 63  | male   |                 |            | Small Cell Lung Cancer     | LCa   | 2                           |
| 2811          | 69  | male   |                 |            | Non-Small Cell Lung Cancer | LCa   | 4                           |
| 2812          | 54  | male   |                 |            | Non-Small Cell Lung Cancer | LCa   | 4                           |
| 2813          | 71  | female |                 |            | Non-Small Cell Lung Cancer | LCa   | 4                           |
| 2814          | 60  | male   |                 |            | Non-Small Cell Lung Cancer | LCa   | 3                           |
| 2815          | 81  | male   |                 |            | Small Cell Lung Cancer     | LCa   | 4                           |
| 2816          | 63  | female |                 |            | Non-Small Cell Lung Cancer | LCa   | 3                           |
| 2817          | 62  | male   |                 |            | Non-Small Cell Lung Cancer | LCa   | 4                           |
| 2818          | 47  | male   |                 |            | Small Cell Lung Cancer     | LCa   | 4                           |
| 2819          | 53  | male   |                 |            | Small Cell Lung Cancer     | LCa   | 2                           |
| 2820          | 63  | male   |                 |            | Small Cell Lung Cancer     | LCa   | 4                           |
| 2821          | 72  | male   |                 |            | Small Cell Lung Cancer     | LCa   | 3                           |
| 2822          | 59  | male   |                 |            | Small Cell Lung Cancer     | LCa   | 3                           |
| 2823          | 75  | female |                 |            | Small Cell Lung Cancer     | LCa   | 4                           |
| 2824          |     |        |                 |            | otherTumor                 | OD    |                             |
| 2825          |     |        |                 |            | otherTumor                 | OD    |                             |
| 2826          |     |        |                 |            | otherTumor                 | OD    |                             |
| 2827          |     |        |                 |            | otherTumor                 | OD    |                             |
| 2828          |     |        |                 |            | otherTumor                 | OD    |                             |
| 2829          | 29  | female |                 |            | HC                         | HC    |                             |
| 2830          | 38  | female |                 |            | HC                         | HC    |                             |
| 2831          | 32  | male   |                 |            | NULD                       | NULD  |                             |
| 2832          | 17  | female |                 |            | NULD                       | NULD  |                             |
| 2833          | 25  | male   |                 |            | NULD                       | NULD  |                             |
| 2834          | 31  | male   |                 |            | NULD                       | NULD  |                             |
| 2835          | 41  | male   |                 |            | NULD                       | NULD  |                             |

| <b>Sample number</b> | <b>Age</b> | <b>Gender</b> | <b>Smoking history</b> | <b>Pack years</b> | <b>Disease</b>     | <b>Group</b> | <b>Stage (only tumor patients)</b> |
|----------------------|------------|---------------|------------------------|-------------------|--------------------|--------------|------------------------------------|
| 2836                 | 58         | male          |                        |                   | NTLD               | NTLD         |                                    |
| 2837                 | 26         | female        |                        |                   | NTLD               | NTLD         |                                    |
| 2838                 | 31         | female        |                        |                   | HC                 | HC           |                                    |
| 2839                 | 28         | male          |                        |                   | NTLD               | NTLD         |                                    |
| 2840                 | 21         | female        |                        |                   | NTLD               | NTLD         |                                    |
| 2841                 | 34         | male          |                        |                   | NTLD               | NTLD         |                                    |
| 2842                 | 44         | male          |                        |                   | NTLD               | NTLD         |                                    |
| 2843                 | 35         | female        |                        |                   | NTLD               | NTLD         |                                    |
| 2844                 | 43         | male          |                        |                   | NTLD               | NTLD         |                                    |
| 2845                 | 27         | male          |                        |                   | HC                 | HC           |                                    |
| 2846                 | 26         | male          |                        |                   | HC                 | HC           |                                    |
| 2847                 | 79         | female        |                        |                   | NTLD               | NTLD         |                                    |
| 2848                 | 24         | male          |                        |                   | NTLD               | NTLD         |                                    |
| 2849                 | 37         | female        |                        |                   | NTLD               | NTLD         |                                    |
| 2850                 | 38         | female        |                        |                   | NTLD               | NTLD         |                                    |
| 2851                 | 38         | female        |                        |                   | NTLD               | NTLD         |                                    |
| 2852                 | 32         | male          |                        |                   | NTLD               | NTLD         |                                    |
| 2853                 | 32         | male          |                        |                   | NTLD               | NTLD         |                                    |
| 2854                 | 30         | female        |                        |                   | HC                 | HC           |                                    |
| 2855                 | 20         | male          |                        |                   | Multiple Sclerosis | OD           |                                    |
| 2856                 | 37         | female        |                        |                   | HC                 | HC           |                                    |
| 2857                 | 30         | female        |                        |                   | Multiple Sclerosis | OD           |                                    |
| 2858                 | 41         | female        |                        |                   | HC                 | HC           |                                    |
| 2859                 | 29         | female        |                        |                   | Multiple Sclerosis | OD           |                                    |
| 2860                 | 35         | female        |                        |                   | HC                 | HC           |                                    |
| 2861                 | 24         | female        |                        |                   | Multiple Sclerosis | OD           |                                    |
| 2862                 | 28         | female        |                        |                   | Multiple Sclerosis | OD           |                                    |
| 2863                 | 23         | male          |                        |                   | HC                 | HC           |                                    |
| 2864                 | 42         | female        |                        |                   | Multiple Sclerosis | OD           |                                    |
| 2865                 | 44         | female        |                        |                   | HC                 | HC           |                                    |
| 2866                 | 28         | female        |                        |                   | Multiple Sclerosis | OD           |                                    |
| 2867                 | 31         | female        |                        |                   | Multiple Sclerosis | OD           |                                    |
| 2868                 | 54         | male          |                        |                   | HC                 | HC           |                                    |
| 2869                 | 42         | male          |                        |                   | Multiple Sclerosis | OD           |                                    |
| 2870                 | 30         | female        |                        |                   | Multiple Sclerosis | OD           |                                    |
| 2871                 | 25         | female        |                        |                   | HC                 | HC           |                                    |
| 2872                 | 40         | female        |                        |                   | Multiple Sclerosis | OD           |                                    |

| Sample number | Age | Gender | Smoking history | Pack years | Disease            | Group | Stage (only tumor patients) |
|---------------|-----|--------|-----------------|------------|--------------------|-------|-----------------------------|
| 2873          | 33  | female |                 |            | HC                 | HC    |                             |
| 2874          | 30  | male   |                 |            | HC                 | HC    |                             |
| 2875          | 26  | female |                 |            | HC                 | HC    |                             |
| 2876          | 44  | male   |                 |            | Multiple Sclerosis | OD    |                             |
| 2877          | 53  | male   |                 |            | Multiple Sclerosis | OD    |                             |
| 2878          | 33  | female |                 |            | Multiple Sclerosis | OD    |                             |
| 2879          | 30  | female |                 |            | Multiple Sclerosis | OD    |                             |
| 2880          | 24  | female |                 |            | HC                 | HC    |                             |
| 2881          | 46  | female |                 |            | Multiple Sclerosis | OD    |                             |
| 2882          | 21  | female |                 |            | HC                 | HC    |                             |
| 2883          | 24  | female |                 |            | HC                 | HC    |                             |
| 2884          | 41  | male   |                 |            | Multiple Sclerosis | OD    |                             |
| 2885          | 23  | male   |                 |            | HC                 | HC    |                             |
| 2886          | 29  | male   |                 |            | HC                 | HC    |                             |
| 2887          | 32  | female |                 |            | HC                 | HC    |                             |
| 2888          | 24  | female |                 |            | Multiple Sclerosis | OD    |                             |
| 2889          | 42  | female |                 |            | Multiple Sclerosis | OD    |                             |
| 2890          | 24  | female |                 |            | HC                 | HC    |                             |
| 2891          | 23  | female |                 |            | Multiple Sclerosis | OD    |                             |
| 2892          | 35  | female |                 |            | Multiple Sclerosis | OD    |                             |
| 2893          | 31  | female |                 |            | Multiple Sclerosis | OD    |                             |
| 2894          | 29  | female |                 |            | Multiple Sclerosis | OD    |                             |
| 2895          | 21  | female |                 |            | HC                 | HC    |                             |
| 2896          | 47  | male   |                 |            | HC                 | HC    |                             |
| 2897          | 25  | female |                 |            | HC                 | HC    |                             |
| 2898          | 35  | female |                 |            | Multiple Sclerosis | OD    |                             |
| 2899          | 22  | female |                 |            | HC                 | HC    |                             |
| 2900          | 41  | female |                 |            | HC                 | HC    |                             |
| 2901          | 20  | female |                 |            | Multiple Sclerosis | OD    |                             |
| 2902          | 41  | female |                 |            | Multiple Sclerosis | OD    |                             |
| 2903          | 21  | female |                 |            | HC                 | HC    |                             |
| 2904          | 21  | female |                 |            | HC                 | HC    |                             |
| 2905          | 23  | female |                 |            | HC                 | HC    |                             |
| 2906          | 46  | male   |                 |            | Multiple Sclerosis | OD    |                             |
| 2907          | 47  | female |                 |            | Multiple Sclerosis | OD    |                             |
| 2908          | 32  | male   |                 |            | Multiple Sclerosis | OD    |                             |
| 2909          | 44  | female |                 |            | Multiple Sclerosis | OD    |                             |

| <b>Sample number</b> | <b>Age</b> | <b>Gender</b> | <b>Smoking history</b> | <b>Pack years</b> | <b>Disease</b>     | <b>Group</b> | <b>Stage (only tumor patients)</b> |
|----------------------|------------|---------------|------------------------|-------------------|--------------------|--------------|------------------------------------|
| 2910                 | 24         | female        |                        |                   | HC                 | HC           |                                    |
| 2911                 | 28         | male          |                        |                   | Multiple Sclerosis | OD           |                                    |
| 2912                 | 24         | female        |                        |                   | Multiple Sclerosis | OD           |                                    |
| 2913                 | 30         | female        |                        |                   | HC                 | HC           |                                    |
| 2914                 | 43         | male          |                        |                   | HC                 | HC           |                                    |
| 2915                 | 43         | female        |                        |                   | Multiple Sclerosis | OD           |                                    |
| 2916                 | 25         | male          |                        |                   | Multiple Sclerosis | OD           |                                    |
| 2917                 | 32         | male          |                        |                   | HC                 | HC           |                                    |
| 2918                 | 45         | female        |                        |                   | HC                 | HC           |                                    |
| 2919                 | 28         | female        |                        |                   | HC                 | HC           |                                    |
| 2920                 | 47         | female        |                        |                   | HC                 | HC           |                                    |
| 2921                 | 26         | female        |                        |                   | HC                 | HC           |                                    |
| 2922                 | 48         | female        |                        |                   | Multiple Sclerosis | OD           |                                    |
| 2923                 | 50         | female        |                        |                   | Multiple Sclerosis | OD           |                                    |
| 2924                 | 23         | female        |                        |                   | HC                 | HC           |                                    |
| 2925                 | 36         | male          |                        |                   | Multiple Sclerosis | OD           |                                    |
| 2926                 | 28         | female        |                        |                   | HC                 | HC           |                                    |
| 2927                 | 33         | female        |                        |                   | HC                 | HC           |                                    |
| 2928                 | 34         | female        |                        |                   | HC                 | HC           |                                    |
| 2929                 | 53         | male          |                        |                   | Multiple Sclerosis | OD           |                                    |
| 2930                 | 32         | female        |                        |                   | Multiple Sclerosis | OD           |                                    |
| 2931                 | 27         | female        |                        |                   | Multiple Sclerosis | OD           |                                    |
| 2932                 | 32         | female        |                        |                   | HC                 | HC           |                                    |
| 2933                 | 30         | female        |                        |                   | Multiple Sclerosis | OD           |                                    |
| 2934                 | 46         | female        |                        |                   | HC                 | HC           |                                    |
| 2935                 | 32         | female        |                        |                   | Multiple Sclerosis | OD           |                                    |
| 2936                 | 42         | male          |                        |                   | HC                 | HC           |                                    |
| 2937                 | 31         | female        |                        |                   | HC                 | HC           |                                    |
| 2938                 | 43         | male          |                        |                   | HC                 | HC           |                                    |
| 2939                 | 28         | female        |                        |                   | Multiple Sclerosis | OD           |                                    |
| 2940                 | 28         | female        |                        |                   | Multiple Sclerosis | OD           |                                    |
| 2941                 | 54         | female        |                        |                   | HC                 | HC           |                                    |
| 2942                 | 27         | male          |                        |                   | HC                 | HC           |                                    |
| 2943                 | 56         | male          |                        |                   | HC                 | HC           |                                    |
| 2944                 | 29         | male          |                        |                   | Multiple Sclerosis | OD           |                                    |
| 2945                 | 47         | male          |                        |                   | Multiple Sclerosis | OD           |                                    |
| 2946                 | 34         | female        |                        |                   | Multiple Sclerosis | OD           |                                    |

| Sample number | Age | Gender | Smoking history | Pack years | Disease            | Group | Stage (only tumor patients) |
|---------------|-----|--------|-----------------|------------|--------------------|-------|-----------------------------|
| 2947          | 42  | female |                 |            | HC                 | HC    |                             |
| 2948          | 42  | male   |                 |            | HC                 | HC    |                             |
| 2949          | 24  | male   |                 |            | Multiple Sclerosis | OD    |                             |
| 2950          | 20  | female |                 |            | Multiple Sclerosis | OD    |                             |
| 2951          | 32  | female |                 |            | HC                 | HC    |                             |
| 2952          | 55  | male   |                 |            | HC                 | HC    |                             |
| 2953          |     | female |                 |            | HC                 | HC    |                             |
| 2954          |     | female |                 |            | HC                 | HC    |                             |
| 2955          | 31  | female |                 |            | HC                 | HC    |                             |
| 2956          | 45  | female |                 |            | HC                 | HC    |                             |
| 2957          |     |        |                 |            | HC                 | HC    |                             |
| 2958          |     |        |                 |            | HC                 | HC    |                             |
| 2959          |     |        |                 |            | HC                 | HC    |                             |
| 2960          |     |        |                 |            | HC                 | HC    |                             |
| 2961          |     |        |                 |            | HC                 | HC    |                             |
| 2962          |     |        |                 |            | HC                 | HC    |                             |
| 2963          |     |        |                 |            | HC                 | HC    |                             |
| 2964          |     |        |                 |            | HC                 | HC    |                             |
| 2965          |     |        |                 |            | HC                 | HC    |                             |
| 2966          |     |        |                 |            | HC                 | HC    |                             |
| 2967          |     |        |                 |            | HC                 | HC    |                             |
| 2968          |     |        |                 |            | HC                 | HC    |                             |
| 2969          |     |        |                 |            | HC                 | HC    |                             |
| 2970          |     |        |                 |            | HC                 | HC    |                             |
| 2971          |     |        |                 |            | HC                 | HC    |                             |
| 2972          |     |        |                 |            | HC                 | HC    |                             |
| 2973          |     |        |                 |            | HC                 | HC    |                             |
| 2974          |     |        |                 |            | HC                 | HC    |                             |
| 2975          |     |        |                 |            | HC                 | HC    |                             |
| 2976          |     |        |                 |            | HC                 | HC    |                             |
| 2977          |     |        |                 |            | HC                 | HC    |                             |
| 2978          |     |        |                 |            | HC                 | HC    |                             |
| 2979          |     |        |                 |            | HC                 | HC    |                             |
| 2980          |     |        |                 |            | HC                 | HC    |                             |
| 2981          |     |        |                 |            | HC                 | HC    |                             |
| 2982          |     |        |                 |            | HC                 | HC    |                             |
| 2983          |     |        |                 |            | HC                 | HC    |                             |



| Sample number | Age  | Gender | Smoking history | Pack years | Disease | Group | Stage (only tumor patients) |
|---------------|------|--------|-----------------|------------|---------|-------|-----------------------------|
| 2984          |      |        |                 |            | HC      | HC    |                             |
| 2985          | 57   | female |                 |            | HC      | HC    |                             |
| 2986          | 57   | female |                 |            | HC      | HC    |                             |
| 2987          | 25   | male   |                 |            | HC      | HC    |                             |
| 2988          | 25   | male   |                 |            | HC      | HC    |                             |
| 2989          | 41   | female |                 |            | HC      | HC    |                             |
| 2990          | 41   | female |                 |            | HC      | HC    |                             |
| 2991          | 33   | female |                 |            | HC      | HC    |                             |
| 2992          | 33   | female |                 |            | HC      | HC    |                             |
| 2993          | 62   | female |                 |            | HC      | HC    |                             |
| 2994          | 62   | female |                 |            | HC      | HC    |                             |
| 2995          | 33   | male   |                 |            | HC      | HC    |                             |
| 2996          | 33   | male   |                 |            | HC      | HC    |                             |
| 2997          | 38   | male   |                 |            | HC      | HC    |                             |
| 2998          | 38   | male   |                 |            | HC      | HC    |                             |
| 2999          | 41   | male   |                 |            | HC      | HC    |                             |
| 3000          | 41   | male   |                 |            | HC      | HC    |                             |
| 3001          | 38   | female |                 |            | HC      | HC    |                             |
| 3002          | 38   | female |                 |            | HC      | HC    |                             |
| 3003          | 45   | male   |                 |            | HC      | HC    |                             |
| 3004          | 45   | male   |                 |            | HC      | HC    |                             |
| 3005          | 18   | female |                 |            | HC      | HC    |                             |
| 3006          | 18   | female |                 |            | HC      | HC    |                             |
| 3007          | 19   | female |                 |            | HC      | HC    |                             |
| 3008          | 19   | female |                 |            | HC      | HC    |                             |
| 3009          | 6.6  | male   |                 |            | HC      | HC    |                             |
| 3010          | 6.6  | male   |                 |            | HC      | HC    |                             |
| 3011          | 4.9  | male   |                 |            | HC      | HC    |                             |
| 3012          | 4.9  | male   |                 |            | HC      | HC    |                             |
| 3013          | 4.1  | male   |                 |            | HC      | HC    |                             |
| 3014          | 13.1 | female |                 |            | HC      | HC    |                             |
| 3015          | 13.1 | female |                 |            | HC      | HC    |                             |
| 3016          | 16.9 | female |                 |            | HC      | HC    |                             |
| 3017          | 16.9 | female |                 |            | HC      | HC    |                             |
| 3018          | 10.6 | male   |                 |            | HC      | HC    |                             |
| 3019          | 10.6 | male   |                 |            | HC      | HC    |                             |
| 3020          | 4.1  | female |                 |            | HC      | HC    |                             |

| <b>Sample number</b> | <b>Age</b> | <b>Gender</b> | <b>Smoking history</b> | <b>Pack years</b> | <b>Disease</b> | <b>Group</b> | <b>Stage (only tumor patients)</b> |
|----------------------|------------|---------------|------------------------|-------------------|----------------|--------------|------------------------------------|
| 3021                 | 4.8        | female        |                        |                   | HC             | HC           |                                    |
| 3022                 | 4.8        | female        |                        |                   | HC             | HC           |                                    |
| 3023                 | 11.7       | female        |                        |                   | HC             | HC           |                                    |
| 3024                 | 11.7       | female        |                        |                   | HC             | HC           |                                    |
| 3025                 | 4.3        | female        |                        |                   | HC             | HC           |                                    |
| 3026                 | 4.3        | female        |                        |                   | HC             | HC           |                                    |
| 3027                 | 7.9        | female        |                        |                   | HC             | HC           |                                    |
| 3028                 | 7.9        | male          |                        |                   | HC             | HC           |                                    |
| 3029                 | 9.2        | male          |                        |                   | HC             | HC           |                                    |
| 3030                 | 9.2        | male          |                        |                   | HC             | HC           |                                    |
| 3031                 | 1.9        | female        |                        |                   | HC             | HC           |                                    |
| 3032                 | 1.9        | male          |                        |                   | HC             | HC           |                                    |
| 3033                 | 18.3       | female        |                        |                   | HC             | HC           |                                    |
| 3034                 | 18.3       | female        |                        |                   | HC             | HC           |                                    |
| 3035                 | 4.1        | male          |                        |                   | HC             | HC           |                                    |
| 3036                 | 4.1        | male          |                        |                   | HC             | HC           |                                    |
| 3037                 | 11.6       | female        |                        |                   | HC             | HC           |                                    |
| 3038                 | 11.6       | female        |                        |                   | HC             | HC           |                                    |
| 3039                 | 8.4        | female        |                        |                   | HC             | HC           |                                    |
| 3040                 | 8.4        | female        |                        |                   | HC             | HC           |                                    |
| 3041                 | 13.2       | male          |                        |                   | HC             | HC           |                                    |
| 3042                 | 13.2       | female        |                        |                   | HC             | HC           |                                    |
| 3043                 | 21.1       | female        |                        |                   | HC             | HC           |                                    |
| 3044                 | 21.1       | female        |                        |                   | HC             | HC           |                                    |
| 3045                 | 9.7        | male          |                        |                   | HC             | HC           |                                    |
| 3046                 | 9.7        | male          |                        |                   | HC             | HC           |                                    |

**eTable 2. Sample Site and Sample Profiling Distribution.** Overview of the sample collection sites and where they were profiled.

| Site / Study                     | #samples | % of samples | cumulative % of samples |
|----------------------------------|----------|--------------|-------------------------|
| Heidelberg                       | 763      | 25           | 25                      |
| Saarland University <sup>1</sup> | 707      | 23           | 48                      |
| Cosyconet <sup>2</sup>           | 538      | 18           | 66                      |
| Tübingen / TREND                 | 336      | 11           | 77                      |
| Völklingen                       | 263      | 9            | 86                      |
| Bremen                           | 104      | 3            | 89                      |
| Berlin                           | 96       | 3            | 92                      |
| Luxemburg                        | 76       | 2            | 95                      |
| Erlangen                         | 63       | 2            | 97                      |
| Karlsruhe                        | 38       | 1            | 98                      |
| Würzburg                         | 36       | 1            | 99                      |
| Barcelona                        | 26       | 1            | 100                     |

| Site Profiling      | #Samples |
|---------------------|----------|
| Heidelberg          | 2219     |
| Saarland University | 827      |

<sup>1</sup> Samples were collected in Homburg and Saarbrücken.

<sup>2</sup> Multi-centric cohort study.

**eTable 3. Results of the ANOVA for the Four Compared Groups.** For each miRNA the mean and median expression in each group is provided along with the standard deviation. Columns 2 and 3 list the raw- and adjusted p-values.

| miRNA           | anova_rawp | anova_adjp | median_LCa | median_NTLD | median_OD |
|-----------------|------------|------------|------------|-------------|-----------|
| hsa-miR-17-3p   | 0          | 0          | 39.200     | 144.963     | 32.202    |
| hsa-miR-21-3p   | 4.24E-276  | 2.51E-273  | 12.193     | 32.627      | 11.323    |
| hsa-miR-193a-3p | 1.28E-168  | 5.05E-166  | 9.489      | 13.414      | 10.069    |
| hsa-miR-18b-5p  | 2.40E-165  | 7.11E-163  | 22.055     | 84.252      | 33.083    |
| hsa-miR-18a-5p  | 1.42E-154  | 3.36E-152  | 36.977     | 171.344     | 66.151    |
| hsa-miR-338-3p  | 3.46E-149  | 6.82E-147  | 33.992     | 70.233      | 30.589    |
| hsa-miR-4286    | 3.53E-148  | 5.97E-146  | 247.251    | 526.531     | 123.477   |
| hsa-miR-144-3p  | 9.72E-125  | 1.44E-122  | 167.063    | 1026.768    | 179.977   |
| hsa-miR-301a-3p | 4.49E-120  | 5.90E-118  | 15.499     | 52.624      | 20.942    |
| hsa-miR-374c-5p | 2.15E-118  | 2.55E-116  | 22.153     | 34.940      | 64.778    |
| hsa-miR-374b-5p | 5.32E-111  | 5.72E-109  | 233.497    | 421.616     | 794.948   |
| hsa-miR-15a-5p  | 1.08E-106  | 1.07E-104  | 2381.825   | 5923.637    | 4852.048  |
| hsa-miR-142-3p  | 1.54E-104  | 1.40E-102  | 1750.457   | 4852.048    | 1667.739  |
| hsa-miR-106b-5p | 4.96E-103  | 4.19E-101  | 3426.571   | 7236.077    | 4221.131  |
| hsa-miR-188-3p  | 2.00E-101  | 1.58E-99   | 7.766      | 8.486       | 7.824     |
| hsa-miR-590-5p  | 5.19E-100  | 3.84E-98   | 19.879     | 67.442      | 31.784    |
| hsa-miR-660-5p  | 6.12E-100  | 4.26E-98   | 155.433    | 367.712     | 277.393   |
| hsa-miR-101-3p  | 2.13E-98   | 1.40E-96   | 101.531    | 367.711     | 171.344   |
| hsa-miR-126-3p  | 2.46E-98   | 1.53E-96   | 399.828    | 984.194     | 984.194   |
| hsa-miR-30d-5p  | 3.13E-97   | 1.85E-95   | 3017.032   | 3017.032    | 1836.074  |
| hsa-miR-29b-3p  | 5.39E-96   | 3.04E-94   | 123.477    | 254.386     | 132.276   |
| hsa-miR-101-5p  | 1.32E-94   | 7.12E-93   | 9.289      | 14.459      | 10.392    |
| hsa-miR-19a-3p  | 1.76E-94   | 9.05E-93   | 643.662    | 1750.457    | 828.206   |
| hsa-miR-500a-3p | 5.04E-93   | 2.48E-91   | 209.704    | 240.165     | 159.192   |
| hsa-miR-27a-3p  | 3.66E-91   | 1.73E-89   | 123.477    | 294.429     | 204.279   |
| hsa-miR-770-5p  | 4.29E-91   | 1.95E-89   | 8.223      | 8.569       | 8.008     |
| hsa-miR-15a-3p  | 1.99E-90   | 8.71E-89   | 11.916     | 16.744      | 13.165    |
| hsa-miR-16-5p   | 5.02E-90   | 2.12E-88   | 41952.033  | 51566.010   | 51566.010 |
| hsa-let-7g-3p   | 2.26E-89   | 9.22E-88   | 7.883      | 8.589       | 7.886     |
| hsa-miR-144-5p  | 6.38E-89   | 2.52E-87   | 116.791    | 643.662     | 570.760   |
| hsa-miR-140-5p  | 1.43E-87   | 5.45E-86   | 46.636     | 108.318     | 91.402    |
| hsa-miR-1260a   | 2.24E-83   | 8.28E-82   | 453.229    | 355.832     | 194.084   |
| hsa-miR-378b    | 2.45E-83   | 8.79E-82   | 11.441     | 9.395       | 9.125     |
| hsa-miR-320d    | 5.03E-83   | 1.75E-81   | 4852.048   | 2139.988    | 2528.247  |
| hsa-miR-20a-5p  | 3.87E-81   | 1.31E-79   | 901.800    | 2381.825    | 1667.739  |
| hsa-miR-363-3p  | 5.26E-81   | 1.73E-79   | 4852.048   | 6332.113    | 7236.077  |

| miRNA           | anova_rawp | anova_adjp | median_LCa | median_NTLD | median_OD |
|-----------------|------------|------------|------------|-------------|-----------|
| hsa-miR-625-5p  | 3.10E-80   | 9.90E-79   | 406.818    | 209.704     | 312.739   |
| hsa-miR-17-5p   | 4.68E-79   | 1.46E-77   | 1331.192   | 2528.247    | 2252.992  |
| hsa-miR-320e    | 1.15E-78   | 3.48E-77   | 3215.214   | 1589.540    | 1750.457  |
| hsa-miR-3607-3p | 3.13E-78   | 9.27E-77   | 8.741      | 8.640       | 10.160    |
| hsa-miR-107     | 2.03E-77   | 5.87E-76   | 8308.735   | 11776.639   | 8877.773  |
| hsa-miR-320c    | 6.52E-77   | 1.84E-75   | 1931.979   | 984.194     | 984.194   |
| hsa-miR-374a-5p | 2.14E-75   | 5.88E-74   | 77.745     | 204.279     | 269.352   |
| hsa-miR-30a-5p  | 2.22E-74   | 5.97E-73   | 78.522     | 84.252      | 47.423    |
| hsa-miR-96-5p   | 2.31E-74   | 6.08E-73   | 194.084    | 437.028     | 380.311   |
| hsa-miR-20b-5p  | 3.35E-74   | 8.61E-73   | 643.662    | 1272.846    | 1070.925  |
| hsa-miR-29c-3p  | 2.26E-73   | 5.69E-72   | 670.919    | 1272.846    | 730.608   |
| hsa-miR-340-5p  | 6.19E-73   | 1.53E-71   | 38.623     | 85.932      | 49.921    |
| hsa-miR-1260b   | 9.85E-73   | 2.38E-71   | 177.793    | 141.839     | 91.402    |
| hsa-miR-126-5p  | 2.94E-71   | 6.96E-70   | 11.565     | 17.949      | 20.942    |
| hsa-miR-3152-3p | 5.78E-69   | 1.34E-67   | 8.005      | 7.957       | 7.583     |
| hsa-miR-30e-5p  | 7.37E-69   | 1.68E-67   | 421.616    | 730.608     | 453.229   |
| hsa-miR-193a-5p | 9.40E-69   | 2.10E-67   | 16.854     | 13.286      | 15.108    |
| hsa-miR-145-5p  | 1.34E-68   | 2.93E-67   | 240.165    | 151.848     | 167.063   |
| hsa-miR-575     | 1.76E-66   | 3.79E-65   | 53.570     | 33.527      | 35.938    |
| hsa-miR-320b    | 2.56E-65   | 5.40E-64   | 3921.622   | 2030.986    | 2381.825  |
| hsa-miR-103a-3p | 1.29E-64   | 2.67E-63   | 7740.069   | 10181.488   | 8877.773  |
| hsa-miR-423-5p  | 1.85E-64   | 3.77E-63   | 1931.979   | 1070.925    | 1520.100  |
| hsa-miR-502-3p  | 2.59E-64   | 5.20E-63   | 273.372    | 294.429     | 209.704   |
| hsa-miR-21-5p   | 1.56E-63   | 3.07E-62   | 1331.192   | 1836.074    | 2252.992  |
| hsa-miR-769-5p  | 1.55E-62   | 3.00E-61   | 24.520     | 30.191      | 22.594    |
| hsa-miR-3190-5p | 8.02E-62   | 1.53E-60   | 13.805     | 15.633      | 13.943    |
| hsa-miR-191-5p  | 3.35E-61   | 6.28E-60   | 42.994     | 29.109      | 40.416    |
| hsa-miR-324-3p  | 2.07E-60   | 3.82E-59   | 4537.804   | 2675.910    | 3215.214  |
| hsa-miR-93-3p   | 4.36E-59   | 7.94E-58   | 71.701     | 66.151      | 87.754    |
| hsa-miR-3651    | 6.47E-59   | 1.16E-57   | 175.608    | 110.679     | 198.981   |
| hsa-miR-4281    | 1.22E-57   | 2.16E-56   | 470.136    | 269.352     | 277.393   |
| hsa-miR-4284    | 4.32E-56   | 7.51E-55   | 901.800    | 506.227     | 762.429   |
| hsa-miR-1290    | 1.16E-55   | 1.99E-54   | 14.305     | 12.443      | 11.401    |
| hsa-miR-130a-3p | 4.46E-55   | 7.54E-54   | 794.948    | 1117.701    | 984.194   |
| hsa-miR-195-5p  | 5.51E-55   | 9.18E-54   | 43.342     | 64.778      | 85.932    |
| hsa-let-7i-3p   | 3.18E-54   | 5.22E-53   | 8.426      | 9.054       | 8.761     |
| hsa-miR-505-3p  | 4.00E-54   | 6.48E-53   | 155.433    | 105.987     | 113.066   |
| hsa-miR-381-3p  | 6.19E-54   | 9.90E-53   | 8.658      | 10.115      | 8.814     |
| hsa-miR-320a    | 1.35E-53   | 2.13E-52   | 2381.825   | 1454.212    | 1520.100  |

| miRNA             | anova_rawp | anova_adjp | median_LCa | median_NTLD | median_OD |
|-------------------|------------|------------|------------|-------------|-----------|
| hsa-miR-3914      | 1.03E-50   | 1.60E-49   | 7.416      | 7.080       | 7.348     |
| hsa-miR-4282      | 1.78E-50   | 2.74E-49   | 8.434      | 7.965       | 8.340     |
| hsa-miR-1285-3p   | 1.97E-50   | 2.99E-49   | 46.636     | 31.784      | 38.623    |
| hsa-miR-139-3p    | 4.06E-50   | 6.07E-49   | 16.854     | 13.607      | 17.442    |
| hsa-miR-148a-3p   | 5.21E-50   | 7.70E-49   | 204.279    | 367.711     | 367.711   |
| hsa-miR-324-5p    | 1.12E-49   | 1.64E-48   | 593.612    | 487.996     | 392.838   |
| hsa-miR-502-5p    | 2.39E-49   | 3.44E-48   | 35.682     | 55.551      | 47.423    |
| hsa-miR-940       | 5.94E-49   | 8.47E-48   | 83.413     | 64.778      | 64.778    |
| hsa-miR-3074-3p   | 1.70E-48   | 2.40E-47   | 8.180      | 8.787       | 8.479     |
| hsa-miR-32-5p     | 1.92E-48   | 2.67E-47   | 7.932      | 8.334       | 7.965     |
| hsa-miR-26b-5p    | 2.48E-48   | 3.42E-47   | 1117.701   | 1836.074    | 2381.825  |
| hsa-miR-23a-5p    | 3.44E-48   | 4.67E-47   | 8.525      | 8.077       | 7.888     |
| hsa-miR-629-3p    | 3.70E-48   | 4.97E-47   | 37.514     | 27.412      | 27.739    |
| hsa-miR-2110      | 1.93E-47   | 2.56E-46   | 18.781     | 13.225      | 16.854    |
| hsa-miR-624-5p    | 5.03E-47   | 6.61E-46   | 18.489     | 31.784      | 30.191    |
| hsa-miR-1249-3p   | 9.66E-47   | 1.26E-45   | 29.470     | 23.039      | 28.071    |
| hsa-miR-665       | 1.25E-46   | 1.60E-45   | 19.078     | 16.423      | 16.744    |
| hsa-miR-3138      | 2.86E-46   | 3.63E-45   | 12.870     | 10.447      | 10.137    |
| hsa-miR-3141      | 2.88E-46   | 3.63E-45   | 20.392     | 15.821      | 14.459    |
| hsa-miR-491-3p    | 1.16E-45   | 1.45E-44   | 9.058      | 9.495       | 9.160     |
| hsa-miR-628-3p    | 1.30E-45   | 1.60E-44   | 16.315     | 15.367      | 20.573    |
| hsa-miR-196b-5p   | 4.16E-45   | 5.08E-44   | 18.710     | 26.486      | 27.089    |
| hsa-miR-181a-5p   | 2.40E-44   | 2.90E-43   | 699.243    | 437.028     | 392.838   |
| hsa-miR-532-5p    | 5.54E-44   | 6.62E-43   | 312.738    | 294.429     | 392.838   |
| hsa-miR-559       | 6.80E-44   | 8.04E-43   | 8.124      | 7.930       | 8.494     |
| hsa-miR-182-5p    | 9.76E-44   | 1.14E-42   | 227.320    | 215.351     | 380.311   |
| hsa-miR-197-3p    | 1.22E-43   | 1.42E-42   | 406.818    | 233.497     | 240.165   |
| hsa-miR-874-3p    | 1.32E-43   | 1.52E-42   | 47.819     | 33.527      | 38.073    |
| hsa-miR-3127-5p   | 3.88E-43   | 4.41E-42   | 21.734     | 17.949      | 15.728    |
| hsa-miR-424-5p    | 7.55E-43   | 8.50E-42   | 27.412     | 62.300      | 52.624    |
| hsa-miR-212-3p    | 7.82E-43   | 8.73E-42   | 18.352     | 18.085      | 15.633    |
| hsa-miR-503-5p    | 2.21E-42   | 2.44E-41   | 8.439      | 9.117       | 8.201     |
| hsa-miR-129-2-3p  | 2.30E-42   | 2.52E-41   | 23.039     | 18.929      | 21.734    |
| hsa-miR-128-3p    | 7.62E-42   | 8.27E-41   | 984.194    | 618.349     | 984.194   |
| hsa-miR-151a-3p   | 8.11E-42   | 8.72E-41   | 943.273    | 548.538     | 730.608   |
| hsa-miR-2115-5p   | 9.63E-42   | 1.03E-40   | 9.407      | 10.137      | 9.224     |
| hsa-miR-219a-1-3p | 1.64E-41   | 1.73E-40   | 6.861      | 7.064       | 6.821     |
| hsa-let-7i-5p     | 1.75E-41   | 1.83E-40   | 7740.069   | 9512.633    | 9512.633  |
| hsa-miR-888-5p    | 1.99E-41   | 2.06E-40   | 7.911      | 7.661       | 7.886     |

| miRNA             | anova_rawp | anova_adjp | median_LCa | median_NTLD | median_OD |
|-------------------|------------|------------|------------|-------------|-----------|
| hsa-miR-505-5p    | 3.25E-41   | 3.35E-40   | 269.352    | 189.249     | 247.251   |
| hsa-miR-452-3p    | 8.14E-41   | 8.30E-40   | 7.059      | 6.821       | 7.014     |
| hsa-miR-337-5p    | 9.31E-41   | 9.41E-40   | 7.920      | 8.201       | 7.890     |
| hsa-miR-584-5p    | 9.59E-41   | 9.61E-40   | 221.167    | 148.386     | 167.063   |
| hsa-miR-1180-3p   | 1.61E-40   | 1.60E-39   | 12.418     | 10.748      | 12.760    |
| hsa-miR-373-5p    | 1.85E-40   | 1.82E-39   | 8.376      | 8.259       | 7.960     |
| hsa-miR-181b-5p   | 2.40E-40   | 2.35E-39   | 44.398     | 31.784      | 31.370    |
| hsa-miR-3686      | 3.45E-40   | 3.34E-39   | 7.288      | 7.037       | 7.278     |
| hsa-miR-15b-3p    | 1.16E-39   | 1.12E-38   | 26.187     | 26.486      | 34.457    |
| hsa-miR-16-2-3p   | 2.11E-39   | 2.01E-38   | 22.922     | 20.942      | 20.756    |
| hsa-miR-454-3p    | 2.69E-39   | 2.55E-38   | 55.056     | 99.341      | 110.679   |
| hsa-miR-513a-3p   | 4.23E-39   | 3.97E-38   | 7.724      | 7.621       | 7.847     |
| hsa-miR-4289      | 9.78E-39   | 9.11E-38   | 7.652      | 7.911       | 7.881     |
| hsa-miR-450a-5p   | 1.88E-38   | 1.73E-37   | 9.205      | 9.862       | 10.447    |
| hsa-miR-620       | 2.05E-38   | 1.88E-37   | 7.591      | 7.304       | 7.494     |
| hsa-miR-150-3p    | 3.45E-38   | 3.14E-37   | 12.624     | 11.097      | 10.339    |
| hsa-miR-29c-5p    | 5.74E-38   | 5.19E-37   | 479.066    | 421.616     | 380.311   |
| hsa-miR-921       | 6.14E-38   | 5.50E-37   | 7.731      | 7.423       | 7.525     |
| hsa-miR-598-3p    | 7.24E-38   | 6.44E-37   | 11.401     | 14.537      | 13.943    |
| hsa-miR-129-1-3p  | 7.32E-38   | 6.46E-37   | 17.199     | 14.776      | 16.527    |
| hsa-miR-23b-3p    | 8.91E-38   | 7.81E-37   | 828.206    | 506.227     | 762.429   |
| hsa-miR-300       | 9.84E-38   | 8.56E-37   | 7.678      | 7.962       | 7.682     |
| hsa-miR-190a-5p   | 2.67E-37   | 2.31E-36   | 9.097      | 10.312      | 9.224     |
| hsa-let-7d-5p     | 6.23E-36   | 5.34E-35   | 5192.812   | 4852.048    | 5923.637  |
| hsa-miR-548e-3p   | 9.83E-36   | 8.36E-35   | 9.508      | 10.160      | 10.849    |
| hsa-miR-518a-5p   | 1.20E-35   | 1.01E-34   | 7.794      | 7.895       | 7.605     |
| hsa-miR-7-5p      | 1.81E-35   | 1.52E-34   | 144.963    | 198.981     | 215.351   |
| hsa-miR-15b-5p    | 2.10E-35   | 1.75E-34   | 78654.362  | 78654.362   | 78654.362 |
| hsa-miR-3200-5p   | 3.05E-35   | 2.52E-34   | 95.205     | 77.745      | 108.318   |
| hsa-miR-3121-3p   | 3.26E-35   | 2.68E-34   | 7.823      | 7.541       | 7.668     |
| hsa-miR-23a-3p    | 4.04E-35   | 3.30E-34   | 6759.712   | 4537.804    | 6332.113  |
| hsa-miR-22-3p     | 4.50E-35   | 3.64E-34   | 11776.639  | 9512.633    | 10181.488 |
| hsa-miR-4328      | 9.88E-35   | 7.95E-34   | 8.474      | 8.445       | 8.316     |
| hsa-miR-219a-5p   | 1.08E-34   | 8.67E-34   | 9.264      | 9.807       | 9.326     |
| hsa-miR-26a-5p    | 2.04E-34   | 1.62E-33   | 2842.786   | 3921.622    | 4537.804  |
| hsa-miR-125b-1-3p | 2.91E-34   | 2.29E-33   | 8.365      | 8.106       | 8.569     |
| hsa-miR-3157-5p   | 1.14E-33   | 8.90E-33   | 8.803      | 9.383       | 8.866     |
| hsa-miR-362-3p    | 3.09E-33   | 2.40E-32   | 27.412     | 53.570      | 46.636    |
| hsa-miR-92a-1-5p  | 4.16E-33   | 3.22E-32   | 7.716      | 7.851       | 7.657     |

| miRNA            | anova_rawp | anova_adjp | median_LCa | median_NTLD | median_OD |
|------------------|------------|------------|------------|-------------|-----------|
| hsa-let-7g-5p    | 5.47E-33   | 4.21E-32   | 3662.829   | 6332.113    | 6332.113  |
| hsa-miR-3907     | 7.39E-33   | 5.64E-32   | 15.108     | 22.153      | 14.537    |
| hsa-miR-3134     | 1.88E-32   | 1.43E-31   | 8.212      | 7.916       | 8.106     |
| hsa-miR-4291     | 2.06E-32   | 1.55E-31   | 27.739     | 35.427      | 42.334    |
| hsa-miR-497-5p   | 2.29E-32   | 1.71E-31   | 9.431      | 11.172      | 10.003    |
| hsa-miR-610      | 3.17E-32   | 2.36E-31   | 11.247     | 10.883      | 11.692    |
| hsa-miR-99b-5p   | 3.68E-32   | 2.72E-31   | 76.960     | 53.570      | 57.679    |
| hsa-miR-26a-1-3p | 3.96E-32   | 2.91E-31   | 9.843      | 10.623      | 10.504    |
| hsa-miR-501-5p   | 4.18E-32   | 3.05E-31   | 130.811    | 103.707     | 129.345   |
| hsa-miR-628-5p   | 4.47E-32   | 3.25E-31   | 10.918     | 11.523      | 13.477    |
| hsa-miR-3679-5p  | 4.57E-32   | 3.29E-31   | 48.632     | 38.623      | 33.992    |
| hsa-miR-1537-3p  | 4.59E-32   | 3.29E-31   | 8.075      | 8.378       | 8.092     |
| hsa-miR-155-5p   | 5.67E-32   | 4.04E-31   | 87.754     | 70.233      | 97.276    |
| hsa-miR-330-3p   | 5.84E-32   | 4.14E-31   | 25.063     | 18.218      | 21.734    |
| hsa-miR-1252-5p  | 5.93E-32   | 4.18E-31   | 8.037      | 7.751       | 7.851     |
| hsa-miR-93-5p    | 6.12E-32   | 4.28E-31   | 1667.739   | 2528.247    | 1931.979  |
| hsa-miR-106b-3p  | 7.39E-32   | 5.14E-31   | 7.853      | 7.856       | 7.960     |
| hsa-miR-3195     | 8.15E-32   | 5.64E-31   | 64.778     | 51.683      | 49.921    |
| hsa-miR-582-5p   | 1.38E-31   | 9.49E-31   | 10.447     | 12.929      | 11.916    |
| hsa-miR-2861     | 1.60E-31   | 1.09E-30   | 209.704    | 141.839     | 194.084   |
| hsa-miR-222-3p   | 2.30E-31   | 1.56E-30   | 108.318    | 118.083     | 135.366   |
| hsa-miR-151a-5p  | 4.11E-31   | 2.78E-30   | 5545.812   | 4221.131    | 5192.812  |
| hsa-miR-3198     | 4.35E-31   | 2.93E-30   | 100.436    | 73.141      | 70.233    |
| hsa-miR-4298     | 5.72E-31   | 3.82E-30   | 16.423     | 12.814      | 12.393    |
| hsa-miR-29a-3p   | 9.25E-31   | 6.15E-30   | 828.206    | 943.273     | 794.948   |
| hsa-miR-3618     | 1.02E-30   | 6.76E-30   | 7.861      | 7.659       | 7.863     |
| hsa-miR-633      | 1.05E-30   | 6.92E-30   | 8.497      | 8.185       | 8.538     |
| hsa-miR-205-5p   | 1.46E-30   | 9.52E-30   | 7.915      | 7.764       | 7.795     |
| hsa-miR-1914-3p  | 1.98E-30   | 1.29E-29   | 119.392    | 84.252      | 97.276    |
| hsa-miR-1973     | 3.78E-30   | 2.45E-29   | 24.520     | 16.114      | 20.392    |
| hsa-miR-3156-5p  | 4.25E-30   | 2.72E-29   | 24.520     | 19.714      | 18.640    |
| hsa-miR-545-5p   | 4.25E-30   | 2.72E-29   | 8.114      | 7.809       | 7.960     |
| hsa-let-7f-5p    | 6.24E-30   | 3.97E-29   | 6759.712   | 7236.077    | 9512.633  |
| hsa-miR-3668     | 8.04E-30   | 5.08E-29   | 7.728      | 7.472       | 7.661     |
| hsa-miR-3124-5p  | 1.64E-29   | 1.03E-28   | 8.902      | 8.515       | 8.325     |
| hsa-miR-3663-3p  | 2.77E-29   | 1.73E-28   | 14.121     | 11.735      | 11.060    |
| hsa-miR-483-5p   | 4.59E-29   | 2.86E-28   | 13.672     | 11.401      | 11.097    |
| hsa-miR-556-5p   | 5.48E-29   | 3.39E-28   | 8.009      | 7.735       | 7.902     |
| hsa-miR-181c-5p  | 5.73E-29   | 3.53E-28   | 19.879     | 21.943      | 16.214    |



| miRNA             | anova_rawp | anova_adjp | median_LCa | median_NTLD | median_OD |
|-------------------|------------|------------|------------|-------------|-----------|
| hsa-miR-548q      | 6.39E-29   | 3.92E-28   | 9.431      | 9.457       | 10.160    |
| hsa-miR-152-3p    | 7.17E-29   | 4.37E-28   | 11.670     | 12.705      | 15.281    |
| hsa-miR-155-3p    | 8.76E-29   | 5.32E-28   | 8.736      | 8.448       | 8.761     |
| hsa-miR-342-5p    | 1.23E-28   | 7.42E-28   | 254.386    | 189.249     | 204.279   |
| hsa-miR-125a-5p   | 1.74E-28   | 1.04E-27   | 221.167    | 159.192     | 184.512   |
| hsa-miR-514b-5p   | 1.74E-28   | 1.04E-27   | 8.787      | 8.349       | 8.328     |
| hsa-miR-181d-5p   | 1.81E-28   | 1.08E-27   | 11.692     | 10.419      | 11.323    |
| hsa-miR-1915-3p   | 4.98E-28   | 2.95E-27   | 113.066    | 79.299      | 101.531   |
| hsa-miR-2052      | 9.04E-28   | 5.32E-27   | 7.684      | 7.406       | 7.619     |
| hsa-miR-27b-3p    | 1.08E-27   | 6.32E-27   | 55.056     | 80.927      | 85.932    |
| hsa-miR-4314      | 1.24E-27   | 7.24E-27   | 8.067      | 7.639       | 7.687     |
| hsa-miR-513a-5p   | 2.08E-27   | 1.21E-26   | 27.905     | 25.340      | 21.329    |
| hsa-miR-652-3p    | 2.14E-27   | 1.24E-26   | 1331.192   | 1070.925    | 1218.673  |
| hsa-miR-3128      | 2.16E-27   | 1.24E-26   | 8.197      | 8.081       | 8.407     |
| hsa-miR-1226-5p   | 2.26E-27   | 1.29E-26   | 8.761      | 8.501       | 8.185     |
| hsa-miR-495-3p    | 3.01E-27   | 1.71E-26   | 14.086     | 15.543      | 19.387    |
| hsa-miR-145-3p    | 3.55E-27   | 2.01E-26   | 9.243      | 9.169       | 9.564     |
| hsa-miR-142-5p    | 4.96E-27   | 2.78E-26   | 194.084    | 294.429     | 254.386   |
| hsa-miR-139-5p    | 4.96E-27   | 2.78E-26   | 16.315     | 12.985      | 14.086    |
| hsa-miR-3611      | 8.16E-27   | 4.55E-26   | 7.993      | 7.764       | 7.713     |
| hsa-miR-24-3p     | 1.50E-26   | 8.32E-26   | 1589.540   | 1589.540    | 1836.074  |
| hsa-miR-3653-3p   | 2.27E-26   | 1.26E-25   | 269.352    | 148.386     | 261.772   |
| hsa-miR-876-3p    | 2.69E-26   | 1.48E-25   | 8.227      | 8.062       | 8.295     |
| hsa-miR-1248      | 3.80E-26   | 2.08E-25   | 7.693      | 7.472       | 7.518     |
| hsa-miR-31-5p     | 3.85E-26   | 2.10E-25   | 8.025      | 8.455       | 8.368     |
| hsa-miR-762       | 5.05E-26   | 2.74E-25   | 48.215     | 35.427      | 39.796    |
| hsa-miR-454-5p    | 5.20E-26   | 2.81E-25   | 23.272     | 25.893      | 30.981    |
| hsa-miR-639       | 5.66E-26   | 3.04E-25   | 7.303      | 7.470       | 7.287     |
| hsa-miR-1207-5p   | 5.90E-26   | 3.16E-25   | 118.083    | 91.402      | 91.402    |
| hsa-miR-3154      | 6.30E-26   | 3.36E-25   | 9.187      | 8.684       | 8.987     |
| hsa-miR-548p      | 1.18E-25   | 6.22E-25   | 8.165      | 7.936       | 8.023     |
| hsa-miR-4259      | 1.18E-25   | 6.22E-25   | 7.876      | 7.858       | 7.585     |
| hsa-miR-181a-2-3p | 1.62E-25   | 8.52E-25   | 17.081     | 14.696      | 16.968    |
| hsa-miR-3167      | 1.94E-25   | 1.02E-24   | 7.820      | 7.798       | 7.965     |
| hsa-miR-3605-5p   | 2.38E-25   | 1.24E-24   | 8.606      | 8.497       | 8.303     |
| hsa-miR-130b-3p   | 2.39E-25   | 1.24E-24   | 670.919    | 526.531     | 643.662   |
| hsa-miR-342-3p    | 3.06E-25   | 1.58E-24   | 2528.247   | 1931.979    | 2381.825  |
| hsa-miR-7-1-3p    | 4.90E-25   | 2.52E-24   | 48.215     | 55.551      | 87.754    |
| hsa-miR-3910      | 5.60E-25   | 2.87E-24   | 7.592      | 7.431       | 7.619     |

| miRNA            | anova_rawp | anova_adjp | median_LCa | median_NTLD | median_OD |
|------------------|------------|------------|------------|-------------|-----------|
| hsa-miR-30c-1-3p | 7.30E-25   | 3.72E-24   | 9.663      | 9.061       | 9.360     |
| hsa-miR-3656     | 1.08E-24   | 5.46E-24   | 221.167    | 151.848     | 204.279   |
| hsa-miR-539-5p   | 1.41E-24   | 7.15E-24   | 8.569      | 8.860       | 9.077     |
| hsa-miR-183-3p   | 1.51E-24   | 7.60E-24   | 18.218     | 14.857      | 17.949    |
| hsa-miR-199b-5p  | 1.60E-24   | 8.00E-24   | 21.533     | 26.778      | 27.412    |
| hsa-miR-642b-3p  | 1.61E-24   | 8.05E-24   | 39.498     | 28.071      | 35.938    |
| hsa-miR-574-3p   | 1.83E-24   | 9.07E-24   | 233.497    | 175.608     | 175.608   |
| hsa-miR-3186-3p  | 1.96E-24   | 9.69E-24   | 7.649      | 7.746       | 7.605     |
| hsa-miR-1302     | 2.53E-24   | 1.25E-23   | 8.382      | 8.185       | 8.368     |
| hsa-miR-19b-1-5p | 2.87E-24   | 1.41E-23   | 8.138      | 8.798       | 8.358     |
| hsa-miR-765      | 3.17E-24   | 1.55E-23   | 10.564     | 9.639       | 9.214     |
| hsa-miR-3147     | 3.23E-24   | 1.57E-23   | 7.724      | 7.511       | 7.390     |
| hsa-miR-1202     | 3.43E-24   | 1.66E-23   | 115.499    | 89.553      | 91.402    |
| hsa-miR-4327     | 4.14E-24   | 2.00E-23   | 9.843      | 9.304       | 8.860     |
| hsa-miR-564      | 6.02E-24   | 2.89E-23   | 24.269     | 20.756      | 26.187    |
| hsa-miR-181c-3p  | 6.06E-24   | 2.90E-23   | 8.994      | 9.862       | 9.134     |
| hsa-miR-335-5p   | 6.31E-24   | 3.01E-23   | 17.442     | 18.352      | 26.778    |
| hsa-miR-606      | 1.22E-23   | 5.81E-23   | 7.771      | 7.534       | 7.737     |
| hsa-miR-19b-3p   | 1.26E-23   | 5.95E-23   | 11776.639  | 17426.344   | 15579.719 |
| hsa-miR-365a-5p  | 1.26E-23   | 5.95E-23   | 7.401      | 7.296       | 7.296     |
| hsa-miR-3941     | 1.42E-23   | 6.65E-23   | 7.663      | 7.569       | 7.749     |
| hsa-miR-1295a    | 1.82E-23   | 8.49E-23   | 8.316      | 8.177       | 8.057     |
| hsa-miR-1304-5p  | 1.82E-23   | 8.49E-23   | 8.984      | 8.940       | 9.656     |
| hsa-miR-296-5p   | 1.85E-23   | 8.58E-23   | 56.582     | 45.871      | 45.871    |
| hsa-miR-1909-3p  | 2.20E-23   | 1.02E-22   | 7.220      | 7.403       | 7.195     |
| hsa-miR-587      | 2.23E-23   | 1.03E-22   | 7.448      | 7.266       | 7.390     |
| hsa-miR-629-5p   | 2.41E-23   | 1.10E-22   | 100.436    | 77.745      | 87.754    |
| hsa-miR-299-3p   | 4.53E-23   | 2.07E-22   | 7.678      | 7.900       | 7.789     |
| hsa-miR-3660     | 4.56E-23   | 2.07E-22   | 7.765      | 7.698       | 7.646     |
| hsa-miR-4324     | 5.44E-23   | 2.47E-22   | 9.623      | 9.360       | 9.608     |
| hsa-miR-1181     | 5.67E-23   | 2.56E-22   | 12.418     | 12.293      | 11.323    |
| hsa-miR-193b-3p  | 5.75E-23   | 2.59E-22   | 13.805     | 12.495      | 13.165    |
| hsa-miR-20a-3p   | 9.95E-23   | 4.46E-22   | 10.339     | 12.145      | 11.822    |
| hsa-miR-4270     | 1.05E-22   | 4.69E-22   | 31.176     | 24.788      | 25.893    |
| hsa-miR-122-3p   | 1.10E-22   | 4.89E-22   | 8.977      | 8.767       | 9.125     |
| hsa-miR-4255     | 1.22E-22   | 5.42E-22   | 7.317      | 7.275       | 7.281     |
| hsa-miR-424-3p   | 1.95E-22   | 8.63E-22   | 9.601      | 8.896       | 9.046     |
| hsa-miR-216b-5p  | 2.03E-22   | 8.95E-22   | 7.095      | 6.928       | 7.064     |
| hsa-miR-1225-5p  | 2.24E-22   | 9.82E-22   | 141.839    | 113.066     | 108.318   |

| miRNA            | anova_rawp | anova_adjp | median_LCa | median_NTLD | median_OD |
|------------------|------------|------------|------------|-------------|-----------|
| hsa-miR-384      | 2.40E-22   | 1.05E-21   | 8.508      | 8.280       | 8.465     |
| hsa-miR-1305     | 5.38E-22   | 2.34E-21   | 74.636     | 58.769      | 55.551    |
| hsa-miR-376c-3p  | 6.37E-22   | 2.76E-21   | 9.853      | 11.210      | 12.443    |
| hsa-miR-132-3p   | 7.23E-22   | 3.12E-21   | 93.233     | 85.932      | 110.679   |
| hsa-miR-590-3p   | 8.02E-22   | 3.45E-21   | 8.182      | 7.854       | 8.101     |
| hsa-miR-133a-3p  | 8.70E-22   | 3.73E-21   | 12.545     | 11.606      | 12.443    |
| hsa-miR-1255b-5p | 1.15E-21   | 4.92E-21   | 30.589     | 22.594      | 29.825    |
| hsa-miR-3945     | 1.16E-21   | 4.95E-21   | 8.905      | 8.530       | 8.581     |
| hsa-miR-1268a    | 1.18E-21   | 5.02E-21   | 45.106     | 34.940      | 34.457    |
| hsa-miR-148b-5p  | 1.29E-21   | 5.46E-21   | 11.191     | 12.342      | 12.651    |
| hsa-miR-3125     | 1.33E-21   | 5.61E-21   | 34.940     | 26.187      | 26.187    |
| hsa-miR-643      | 1.52E-21   | 6.39E-21   | 7.722      | 7.760       | 7.955     |
| hsa-miR-3130-3p  | 1.58E-21   | 6.58E-21   | 7.176      | 7.275       | 7.227     |
| hsa-miR-26b-3p   | 1.61E-21   | 6.71E-21   | 12.651     | 12.760      | 13.943    |
| hsa-miR-1976     | 1.68E-21   | 6.99E-21   | 14.014     | 13.045      | 12.443    |
| hsa-miR-9-3p     | 1.94E-21   | 8.03E-21   | 7.840      | 7.809       | 8.337     |
| hsa-miR-532-3p   | 2.78E-21   | 1.15E-20   | 1931.979   | 1331.192    | 1667.739  |
| hsa-miR-154-3p   | 2.81E-21   | 1.15E-20   | 8.245      | 8.472       | 8.530     |
| hsa-miR-744-5p   | 2.90E-21   | 1.19E-20   | 107.152    | 80.927      | 89.553    |
| hsa-miR-450b-5p  | 3.15E-21   | 1.29E-20   | 8.412      | 8.169       | 8.388     |
| hsa-miR-3201     | 3.86E-21   | 1.56E-20   | 6.861      | 6.641       | 6.876     |
| hsa-miR-3161     | 3.86E-21   | 1.56E-20   | 8.689      | 8.204       | 8.378     |
| hsa-miR-1245a    | 3.97E-21   | 1.60E-20   | 7.995      | 7.829       | 7.999     |
| hsa-miR-98-5p    | 4.00E-21   | 1.61E-20   | 62.924     | 77.745      | 95.205    |
| hsa-miR-3911     | 4.35E-21   | 1.75E-20   | 9.594      | 9.360       | 8.987     |
| hsa-miR-365a-3p  | 4.68E-21   | 1.87E-20   | 285.644    | 204.279     | 285.644   |
| hsa-miR-551b-3p  | 4.79E-21   | 1.91E-20   | 8.619      | 9.187       | 9.109     |
| hsa-miR-24-2-5p  | 6.08E-21   | 2.41E-20   | 7.222      | 7.055       | 7.157     |
| hsa-miR-3135a    | 6.39E-21   | 2.53E-20   | 7.248      | 7.164       | 7.191     |
| hsa-miR-150-5p   | 6.86E-21   | 2.70E-20   | 12797.198  | 9512.633    | 10899.865 |
| hsa-miR-3137     | 8.87E-21   | 3.48E-20   | 11.961     | 9.901       | 10.953    |
| hsa-miR-18a-3p   | 8.88E-21   | 3.48E-20   | 13.105     | 12.342      | 16.014    |
| hsa-miR-3179     | 1.21E-20   | 4.72E-20   | 8.801      | 8.177       | 8.708     |
| hsa-miR-214-3p   | 1.46E-20   | 5.69E-20   | 7.654      | 7.426       | 7.411     |
| hsa-miR-138-1-3p | 1.99E-20   | 7.71E-20   | 7.628      | 7.423       | 7.587     |
| hsa-miR-656-3p   | 2.11E-20   | 8.17E-20   | 8.977      | 8.736       | 9.030     |
| hsa-miR-3926     | 2.28E-20   | 8.78E-20   | 11.023     | 9.687       | 10.365    |
| hsa-miR-3616-3p  | 2.39E-20   | 9.17E-20   | 11.822     | 10.534      | 12.495    |
| hsa-miR-1322     | 2.80E-20   | 1.07E-19   | 7.534      | 7.364       | 7.503     |

| miRNA           | anova_rawp | anova_adjp | median_LCa | median_NTLD | median_OD |
|-----------------|------------|------------|------------|-------------|-----------|
| hsa-miR-20b-3p  | 2.89E-20   | 1.10E-19   | 7.190      | 7.377       | 7.284     |
| hsa-miR-4293    | 3.16E-20   | 1.20E-19   | 7.101      | 7.023       | 7.208     |
| hsa-miR-766-3p  | 3.17E-20   | 1.20E-19   | 148.386    | 115.499     | 118.083   |
| hsa-miR-515-5p  | 3.76E-20   | 1.42E-19   | 8.546      | 8.334       | 8.497     |
| hsa-miR-135a-3p | 4.32E-20   | 1.63E-19   | 12.760     | 10.593      | 11.323    |
| hsa-miR-1263    | 5.19E-20   | 1.95E-19   | 7.536      | 7.644       | 7.680     |
| hsa-miR-1273c   | 7.12E-20   | 2.66E-19   | 9.798      | 9.046       | 9.101     |
| hsa-miR-30c-5p  | 8.92E-20   | 3.33E-19   | 6332.113   | 5545.812    | 7236.077  |
| hsa-miR-550b-3p | 9.32E-20   | 3.47E-19   | 8.117      | 8.352       | 8.455     |
| hsa-miR-1275    | 1.04E-19   | 3.85E-19   | 49.049     | 35.427      | 37.514    |
| hsa-miR-3934-5p | 1.15E-19   | 4.27E-19   | 11.210     | 10.025      | 10.504    |
| hsa-miR-187-3p  | 1.26E-19   | 4.63E-19   | 7.377      | 7.217       | 7.361     |
| hsa-let-7a-3p   | 1.34E-19   | 4.93E-19   | 9.034      | 8.884       | 9.101     |
| hsa-miR-208b-3p | 1.44E-19   | 5.26E-19   | 7.647      | 7.436       | 7.641     |
| hsa-miR-494-3p  | 1.53E-19   | 5.57E-19   | 1026.768   | 548.538     | 593.612   |
| hsa-miR-486-3p  | 2.12E-19   | 7.71E-19   | 7.675      | 7.876       | 7.655     |
| hsa-let-7d-3p   | 2.43E-19   | 8.82E-19   | 17.687     | 13.943      | 14.305    |
| hsa-miR-491-5p  | 3.23E-19   | 1.17E-18   | 8.495      | 8.280       | 8.452     |
| hsa-miR-146b-5p | 4.49E-19   | 1.62E-18   | 41.034     | 50.779      | 57.679    |
| hsa-miR-143-3p  | 4.93E-19   | 1.77E-18   | 7.737      | 8.159       | 8.112     |
| hsa-miR-3197    | 5.93E-19   | 2.13E-18   | 8.186      | 8.084       | 8.388     |
| hsa-miR-3118    | 7.57E-19   | 2.70E-18   | 8.391      | 8.231       | 8.384     |
| hsa-miR-361-5p  | 8.10E-19   | 2.89E-18   | 367.711    | 269.352     | 344.644   |
| hsa-miR-208a-3p | 1.25E-18   | 4.46E-18   | 7.397      | 7.254       | 7.403     |
| hsa-miR-617     | 1.37E-18   | 4.85E-18   | 10.036     | 9.294       | 10.564    |
| hsa-miR-542-5p  | 1.42E-18   | 5.03E-18   | 16.014     | 16.635      | 14.305    |
| hsa-miR-1301-3p | 1.69E-18   | 5.94E-18   | 8.455      | 8.156       | 8.094     |
| hsa-miR-379-5p  | 2.13E-18   | 7.47E-18   | 7.513      | 7.724       | 7.711     |
| hsa-miR-33b-3p  | 2.15E-18   | 7.52E-18   | 23.391     | 21.135      | 20.392    |
| hsa-miR-379-3p  | 2.34E-18   | 8.16E-18   | 7.965      | 7.955       | 8.112     |
| hsa-miR-423-3p  | 2.40E-18   | 8.35E-18   | 45.488     | 36.451      | 39.200    |
| hsa-miR-103b    | 2.56E-18   | 8.89E-18   | 8.921      | 8.712       | 8.947     |
| hsa-miR-375     | 3.02E-18   | 1.04E-17   | 7.345      | 7.337       | 7.275     |
| hsa-miR-4271    | 3.26E-18   | 1.13E-17   | 16.114     | 13.874      | 13.874    |
| hsa-miR-3126-5p | 3.34E-18   | 1.15E-17   | 7.431      | 7.348       | 7.345     |
| hsa-miR-326     | 3.58E-18   | 1.23E-17   | 48.632     | 45.106      | 37.514    |
| hsa-miR-1228-3p | 3.59E-18   | 1.23E-17   | 35.938     | 31.784      | 32.627    |
| hsa-miR-1307-3p | 3.80E-18   | 1.29E-17   | 14.050     | 11.916      | 12.342    |
| hsa-miR-138-5p  | 3.99E-18   | 1.36E-17   | 7.349      | 7.441       | 7.367     |

| miRNA            | anova_rawp | anova_adjp | median_LCa | median_NTLD | median_OD |
|------------------|------------|------------|------------|-------------|-----------|
| hsa-miR-183-5p   | 4.80E-18   | 1.63E-17   | 367.711    | 453.229     | 406.818   |
| hsa-miR-1273e    | 6.38E-18   | 2.16E-17   | 11.172     | 9.639       | 11.172    |
| hsa-miR-4323     | 6.77E-18   | 2.28E-17   | 61.140     | 49.049      | 50.779    |
| hsa-miR-3937     | 7.70E-18   | 2.59E-17   | 9.130      | 8.731       | 8.814     |
| hsa-miR-3176     | 9.87E-18   | 3.31E-17   | 13.414     | 10.883      | 13.607    |
| hsa-miR-711      | 1.02E-17   | 3.39E-17   | 7.665      | 7.460       | 7.465     |
| hsa-miR-449c-3p  | 1.18E-17   | 3.91E-17   | 8.188      | 8.565       | 8.106     |
| hsa-miR-4253     | 1.18E-17   | 3.91E-17   | 8.404      | 8.130       | 8.167     |
| hsa-miR-153-3p   | 1.19E-17   | 3.94E-17   | 7.646      | 7.470       | 7.607     |
| hsa-miR-337-3p   | 1.24E-17   | 4.11E-17   | 15.193     | 15.821      | 18.929    |
| hsa-miR-4299     | 1.26E-17   | 4.15E-17   | 670.919    | 487.996     | 593.612   |
| hsa-miR-3606-5p  | 1.33E-17   | 4.37E-17   | 8.478      | 8.209       | 8.378     |
| hsa-miR-30b-3p   | 1.35E-17   | 4.43E-17   | 8.787      | 9.069       | 8.649     |
| hsa-miR-3168     | 2.38E-17   | 7.78E-17   | 7.583      | 7.537       | 7.664     |
| hsa-miR-890      | 2.88E-17   | 9.40E-17   | 7.440      | 7.321       | 7.406     |
| hsa-miR-3193     | 3.23E-17   | 1.05E-16   | 7.584      | 7.443       | 7.485     |
| hsa-miR-1321     | 4.46E-17   | 1.44E-16   | 7.566      | 7.393       | 7.470     |
| hsa-miR-22-5p    | 4.60E-17   | 1.49E-16   | 26.040     | 24.269      | 34.457    |
| hsa-miR-516b-5p  | 4.66E-17   | 1.50E-16   | 7.822      | 7.789       | 7.771     |
| hsa-miR-3155a    | 4.76E-17   | 1.53E-16   | 7.717      | 7.621       | 7.655     |
| hsa-miR-3917     | 5.01E-17   | 1.61E-16   | 9.130      | 8.698       | 8.909     |
| hsa-miR-10b-5p   | 6.11E-17   | 1.95E-16   | 11.191     | 10.392      | 11.869    |
| hsa-miR-3189-3p  | 6.54E-17   | 2.09E-16   | 7.573      | 7.735       | 7.596     |
| hsa-miR-29b-2-5p | 7.57E-17   | 2.41E-16   | 8.409      | 8.947       | 9.151     |
| hsa-miR-3609     | 8.01E-17   | 2.54E-16   | 8.470      | 8.245       | 8.322     |
| hsa-miR-518f-3p  | 8.82E-17   | 2.79E-16   | 8.298      | 8.156       | 8.300     |
| hsa-miR-210-3p   | 9.81E-17   | 3.09E-16   | 593.612    | 618.349     | 470.136   |
| hsa-miR-1231     | 9.90E-17   | 3.12E-16   | 6.784      | 6.603       | 6.753     |
| hsa-miR-378c     | 1.01E-16   | 3.17E-16   | 7.625      | 7.487       | 7.650     |
| hsa-miR-4257     | 1.05E-16   | 3.30E-16   | 12.929     | 12.145      | 11.916    |
| hsa-miR-3180-3p  | 1.21E-16   | 3.79E-16   | 70.233     | 50.779      | 62.300    |
| hsa-miR-3677-3p  | 1.31E-16   | 4.09E-16   | 7.112      | 7.198       | 7.009     |
| hsa-miR-374a-3p  | 1.38E-16   | 4.28E-16   | 8.469      | 8.188       | 8.358     |
| hsa-miR-568      | 1.54E-16   | 4.77E-16   | 8.243      | 8.027       | 8.130     |
| hsa-miR-3659     | 1.69E-16   | 5.21E-16   | 7.769      | 7.916       | 7.800     |
| hsa-miR-431-3p   | 1.91E-16   | 5.89E-16   | 8.088      | 8.109       | 8.265     |
| hsa-miR-409-3p   | 2.00E-16   | 6.13E-16   | 74.636     | 56.582      | 71.701    |
| hsa-miR-3652     | 2.10E-16   | 6.44E-16   | 20.756     | 16.315      | 16.854    |
| hsa-miR-1972     | 2.88E-16   | 8.80E-16   | 13.045     | 10.115      | 11.247    |

| miRNA           | anova_rawp | anova_adjp | median_LCa | median_NTLD | median_OD |
|-----------------|------------|------------|------------|-------------|-----------|
| hsa-miR-498     | 3.14E-16   | 9.56E-16   | 8.600      | 8.577       | 8.394     |
| hsa-miR-2276-3p | 3.14E-16   | 9.56E-16   | 10.352     | 9.719       | 9.881     |
| hsa-miR-323b-5p | 3.25E-16   | 9.85E-16   | 7.532      | 7.678       | 7.592     |
| hsa-miR-369-5p  | 3.50E-16   | 1.06E-15   | 9.109      | 9.656       | 9.703     |
| hsa-miR-1234-3p | 4.23E-16   | 1.28E-15   | 36.451     | 34.940      | 33.527    |
| hsa-miR-1183    | 4.70E-16   | 1.42E-15   | 9.105      | 8.530       | 8.902     |
| hsa-miR-1261    | 4.86E-16   | 1.46E-15   | 7.596      | 7.737       | 7.626     |
| hsa-miR-3188    | 4.89E-16   | 1.46E-15   | 9.543      | 8.974       | 9.536     |
| hsa-miR-3202    | 5.48E-16   | 1.64E-15   | 9.038      | 8.636       | 8.727     |
| hsa-miR-577     | 6.20E-16   | 1.85E-15   | 8.272      | 8.052       | 8.153     |
| hsa-miR-1208    | 7.02E-16   | 2.09E-15   | 7.821      | 7.811       | 7.777     |
| hsa-miR-92b-3p  | 7.71E-16   | 2.29E-15   | 18.640     | 16.854      | 17.442    |
| hsa-miR-1284    | 8.41E-16   | 2.49E-15   | 7.789      | 8.133       | 7.986     |
| hsa-miR-3944-3p | 8.54E-16   | 2.52E-15   | 7.336      | 7.511       | 7.356     |
| hsa-miR-28-5p   | 8.69E-16   | 2.56E-15   | 101.531    | 99.341      | 120.702   |
| hsa-miR-1262    | 8.85E-16   | 2.60E-15   | 7.831      | 7.639       | 7.739     |
| hsa-miR-3610    | 1.00E-15   | 2.94E-15   | 8.395      | 8.087       | 7.994     |
| hsa-miR-519e-5p | 1.08E-15   | 3.15E-15   | 8.223      | 8.185       | 8.081     |
| hsa-miR-548j-5p | 1.22E-15   | 3.55E-15   | 8.241      | 8.167       | 8.490     |
| hsa-miR-3936    | 1.47E-15   | 4.28E-15   | 7.512      | 7.468       | 7.453     |
| hsa-miR-135b-3p | 1.65E-15   | 4.79E-15   | 7.188      | 7.042       | 7.097     |
| hsa-miR-708-5p  | 1.74E-15   | 5.04E-15   | 7.802      | 7.715       | 7.907     |
| hsa-miR-323b-3p | 1.91E-15   | 5.50E-15   | 7.004      | 7.055       | 6.916     |
| hsa-miR-124-5p  | 1.98E-15   | 5.69E-15   | 7.582      | 7.581       | 7.706     |
| hsa-miR-611     | 1.99E-15   | 5.72E-15   | 7.186      | 7.248       | 7.171     |
| hsa-miR-188-5p  | 2.04E-15   | 5.86E-15   | 17.320     | 17.949      | 15.455    |
| hsa-miR-377-3p  | 2.15E-15   | 6.13E-15   | 9.407      | 10.447      | 10.069    |
| hsa-miR-1229-3p | 2.63E-15   | 7.48E-15   | 14.231     | 14.696      | 13.805    |
| hsa-miR-604     | 2.77E-15   | 7.86E-15   | 7.846      | 7.847       | 7.969     |
| hsa-miR-3122    | 2.77E-15   | 7.86E-15   | 7.388      | 7.388       | 7.390     |
| hsa-miR-361-3p  | 3.03E-15   | 8.59E-15   | 699.243    | 548.538     | 548.538   |
| hsa-miR-4313    | 3.20E-15   | 9.03E-15   | 34.224     | 30.981      | 30.589    |
| hsa-miR-449b-3p | 3.25E-15   | 9.17E-15   | 8.703      | 9.304       | 8.782     |
| hsa-miR-654-5p  | 3.96E-15   | 1.11E-14   | 9.178      | 8.872       | 8.854     |
| hsa-miR-1272    | 3.99E-15   | 1.12E-14   | 7.532      | 7.472       | 7.571     |
| hsa-let-7a-5p   | 4.72E-15   | 1.32E-14   | 19451.763  | 19451.763   | 21787.992 |
| hsa-miR-9-5p    | 5.18E-15   | 1.44E-14   | 8.155      | 8.109       | 8.240     |
| hsa-miR-2114-3p | 5.43E-15   | 1.51E-14   | 7.711      | 7.720       | 7.671     |
| hsa-miR-1182    | 5.73E-15   | 1.59E-14   | 7.526      | 7.227       | 7.208     |

| miRNA             | anova_rawp | anova_adjp | median_LCa | median_NTLD | median_OD |
|-------------------|------------|------------|------------|-------------|-----------|
| hsa-miR-583       | 5.85E-15   | 1.62E-14   | 7.599      | 7.372       | 7.472     |
| hsa-miR-1297      | 6.62E-15   | 1.83E-14   | 7.472      | 7.324       | 7.451     |
| hsa-miR-933       | 6.78E-15   | 1.87E-14   | 12.651     | 12.393      | 12.870    |
| hsa-miR-24-1-5p   | 6.79E-15   | 1.87E-14   | 8.426      | 8.675       | 8.410     |
| hsa-miR-199a-3p   | 7.04E-15   | 1.93E-14   | 17.442     | 33.992      | 31.784    |
| hsa-miR-675-3p    | 7.21E-15   | 1.97E-14   | 8.515      | 8.884       | 8.519     |
| hsa-miR-2355-5p   | 7.27E-15   | 1.99E-14   | 8.189      | 8.295       | 8.378     |
| hsa-let-7b-5p     | 7.40E-15   | 2.02E-14   | 14023.704  | 12797.198   | 10181.488 |
| hsa-miR-202-3p    | 8.44E-15   | 2.30E-14   | 8.990      | 8.934       | 8.631     |
| hsa-miR-664a-5p   | 8.64E-15   | 2.34E-14   | 32.202     | 21.943      | 25.615    |
| hsa-miR-219a-2-3p | 1.56E-14   | 4.21E-14   | 7.607      | 7.733       | 7.742     |
| hsa-miR-1273d     | 1.84E-14   | 4.97E-14   | 7.863      | 7.592       | 7.687     |
| hsa-miR-3140-3p   | 1.85E-14   | 5.00E-14   | 7.818      | 8.001       | 8.025     |
| hsa-miR-935       | 2.27E-14   | 6.11E-14   | 7.681      | 7.909       | 7.698     |
| hsa-miR-875-3p    | 3.65E-14   | 9.78E-14   | 7.403      | 7.356       | 7.332     |
| hsa-miR-545-3p    | 3.77E-14   | 1.01E-13   | 8.746      | 8.974       | 8.736     |
| hsa-miR-127-3p    | 4.31E-14   | 1.15E-13   | 14.537     | 12.443      | 13.943    |
| hsa-miR-3616-5p   | 4.49E-14   | 1.20E-13   | 7.957      | 7.798       | 7.838     |
| hsa-miR-137       | 4.52E-14   | 1.20E-13   | 7.502      | 7.364       | 7.520     |
| hsa-miR-3665      | 4.59E-14   | 1.22E-13   | 118.083    | 99.341      | 99.341    |
| hsa-miR-192-3p    | 4.83E-14   | 1.28E-13   | 12.760     | 14.459      | 14.776    |
| hsa-miR-671-5p    | 5.03E-14   | 1.33E-13   | 21.135     | 18.218      | 16.854    |
| hsa-miR-431-5p    | 5.62E-14   | 1.48E-13   | 8.746      | 9.284       | 8.831     |
| hsa-miR-668-3p    | 5.69E-14   | 1.50E-13   | 8.271      | 8.497       | 8.374     |
| hsa-miR-100-3p    | 6.05E-14   | 1.59E-13   | 8.123      | 7.994       | 8.122     |
| hsa-miR-1911-3p   | 6.56E-14   | 1.71E-13   | 7.899      | 8.167       | 7.991     |
| hsa-miR-1224-5p   | 6.56E-14   | 1.71E-13   | 13.737     | 11.916      | 12.870    |
| hsa-miR-186-5p    | 6.91E-14   | 1.80E-13   | 901.800    | 828.206     | 863.313   |
| hsa-miR-3648      | 6.96E-14   | 1.81E-13   | 10.392     | 9.843       | 9.687     |
| hsa-miR-148b-3p   | 7.30E-14   | 1.89E-13   | 204.279    | 247.251     | 227.320   |
| hsa-miR-378a-3p   | 7.77E-14   | 2.01E-13   | 221.167    | 167.063     | 204.279   |
| hsa-miR-3658      | 8.15E-14   | 2.10E-13   | 7.591      | 7.433       | 7.610     |
| hsa-miR-3184-5p   | 8.36E-14   | 2.15E-13   | 7.853      | 7.818       | 7.984     |
| hsa-miR-1233-3p   | 8.75E-14   | 2.25E-13   | 8.262      | 8.667       | 8.343     |
| hsa-miR-566       | 9.78E-14   | 2.51E-13   | 8.724      | 8.598       | 8.494     |
| hsa-miR-548c-3p   | 1.05E-13   | 2.69E-13   | 9.187      | 8.896       | 9.234     |
| hsa-miR-4251      | 1.06E-13   | 2.71E-13   | 7.367      | 7.227       | 7.332     |
| hsa-miR-1471      | 1.15E-13   | 2.94E-13   | 8.667      | 8.140       | 8.328     |
| hsa-miR-2115-3p   | 1.17E-13   | 2.98E-13   | 7.968      | 7.888       | 8.020     |

| miRNA             | anova_rawp | anova_adjp | median_LCa | median_NTLD | median_OD |
|-------------------|------------|------------|------------|-------------|-----------|
| hsa-miR-630       | 1.17E-13   | 2.98E-13   | 9.962      | 9.093       | 9.224     |
| hsa-miR-4274      | 1.21E-13   | 3.06E-13   | 12.760     | 12.495      | 12.985    |
| hsa-miR-571       | 1.30E-13   | 3.29E-13   | 8.854      | 8.340       | 8.782     |
| hsa-miR-125a-3p   | 1.34E-13   | 3.37E-13   | 22.699     | 20.048      | 19.229    |
| hsa-miR-518e-5p   | 1.42E-13   | 3.57E-13   | 7.728      | 7.798       | 7.693     |
| hsa-miR-184       | 1.63E-13   | 4.10E-13   | 8.476      | 8.374       | 8.245     |
| hsa-miR-551b-5p   | 1.80E-13   | 4.52E-13   | 7.076      | 6.962       | 6.940     |
| hsa-miR-3916      | 1.94E-13   | 4.85E-13   | 7.795      | 8.008       | 7.948     |
| hsa-miR-509-3p    | 2.27E-13   | 5.65E-13   | 7.655      | 7.661       | 7.691     |
| hsa-miR-10a-5p    | 2.39E-13   | 5.95E-13   | 32.202     | 31.784      | 41.034    |
| hsa-miR-646       | 2.43E-13   | 6.03E-13   | 7.472      | 7.571       | 7.458     |
| hsa-miR-518b      | 2.49E-13   | 6.17E-13   | 8.649      | 8.573       | 8.649     |
| hsa-miR-410-3p    | 2.57E-13   | 6.35E-13   | 8.724      | 9.264       | 9.243     |
| hsa-miR-411-3p    | 2.78E-13   | 6.86E-13   | 7.789      | 8.027       | 7.972     |
| hsa-miR-3918      | 2.93E-13   | 7.21E-13   | 7.408      | 7.361       | 7.375     |
| hsa-miR-30d-3p    | 2.97E-13   | 7.31E-13   | 8.112      | 8.286       | 8.204     |
| hsa-miR-1-3p      | 3.47E-13   | 8.51E-13   | 7.824      | 7.605       | 7.751     |
| hsa-miR-4252      | 3.68E-13   | 9.02E-13   | 8.656      | 8.809       | 8.585     |
| hsa-miR-601       | 4.06E-13   | 9.93E-13   | 8.589      | 8.337       | 8.322     |
| hsa-miR-3605-3p   | 4.15E-13   | 1.01E-12   | 15.633     | 13.672      | 14.231    |
| hsa-miR-3679-3p   | 4.36E-13   | 1.06E-12   | 14.014     | 13.165      | 13.350    |
| hsa-miR-487b-3p   | 4.72E-13   | 1.15E-12   | 13.839     | 16.114      | 14.776    |
| hsa-miR-362-5p    | 5.29E-13   | 1.28E-12   | 367.711    | 333.518     | 312.738   |
| hsa-miR-922       | 5.36E-13   | 1.30E-12   | 7.168      | 7.046       | 7.132     |
| hsa-miR-3654      | 6.17E-13   | 1.49E-12   | 7.618      | 7.426       | 7.492     |
| hsa-miR-3940-3p   | 6.33E-13   | 1.53E-12   | 20.048     | 18.929      | 17.565    |
| hsa-miR-3667-3p   | 6.40E-13   | 1.54E-12   | 8.278      | 8.497       | 8.428     |
| hsa-miR-138-2-3p  | 6.70E-13   | 1.61E-12   | 11.116     | 9.101       | 10.184    |
| hsa-miR-378a-5p   | 6.79E-13   | 1.63E-12   | 133.821    | 110.679     | 101.531   |
| hsa-miR-28-3p     | 7.05E-13   | 1.69E-12   | 8.373      | 8.240       | 8.519     |
| hsa-miR-141-3p    | 7.73E-13   | 1.84E-12   | 7.571      | 8.092       | 7.769     |
| hsa-miR-615-5p    | 8.52E-13   | 2.03E-12   | 7.711      | 7.655       | 7.771     |
| hsa-miR-622       | 1.04E-12   | 2.47E-12   | 8.682      | 8.437       | 8.594     |
| hsa-miR-3175      | 1.06E-12   | 2.52E-12   | 7.183      | 7.105       | 7.147     |
| hsa-miR-1237-3p   | 1.07E-12   | 2.52E-12   | 17.949     | 17.565      | 17.320    |
| hsa-miR-297       | 1.09E-12   | 2.57E-12   | 7.511      | 7.359       | 7.465     |
| hsa-miR-4318      | 1.16E-12   | 2.74E-12   | 53.570     | 61.140      | 56.582    |
| hsa-miR-103a-2-5p | 1.24E-12   | 2.92E-12   | 18.929     | 21.734      | 24.520    |
| hsa-miR-659-3p    | 1.64E-12   | 3.84E-12   | 8.317      | 8.512       | 8.138     |



| miRNA           | anova_rawp | anova_adjp | median_LCa | median_NTLD | median_OD |
|-----------------|------------|------------|------------|-------------|-----------|
| hsa-miR-548g-3p | 1.64E-12   | 3.85E-12   | 9.326      | 8.909       | 9.169     |
| hsa-miR-525-5p  | 1.73E-12   | 4.04E-12   | 8.371      | 8.358       | 8.215     |
| hsa-miR-4269    | 1.79E-12   | 4.17E-12   | 7.972      | 8.047       | 7.835     |
| hsa-miR-140-3p  | 1.80E-12   | 4.20E-12   | 12797.198  | 10899.865   | 10181.488 |
| hsa-miR-193b-5p | 1.96E-12   | 4.56E-12   | 8.063      | 7.621       | 8.027     |
| hsa-miR-3115    | 2.28E-12   | 5.29E-12   | 7.980      | 8.180       | 8.220     |
| hsa-miR-4280    | 2.47E-12   | 5.72E-12   | 7.905      | 7.865       | 7.920     |
| hsa-miR-641     | 2.57E-12   | 5.95E-12   | 10.222     | 9.753       | 10.623    |
| hsa-miR-3065-5p | 2.66E-12   | 6.14E-12   | 7.778      | 7.700       | 7.811     |
| hsa-miR-1255a   | 2.69E-12   | 6.18E-12   | 9.366      | 8.640       | 9.508     |
| hsa-miR-934     | 2.73E-12   | 6.27E-12   | 6.916      | 6.962       | 6.916     |
| hsa-miR-448     | 2.86E-12   | 6.57E-12   | 8.504      | 8.259       | 8.355     |
| hsa-miR-3675-3p | 3.16E-12   | 7.23E-12   | 13.607     | 13.105      | 13.477    |
| hsa-miR-589-3p  | 3.45E-12   | 7.89E-12   | 10.325     | 9.383       | 10.091    |
| hsa-miR-3130-5p | 3.70E-12   | 8.44E-12   | 9.050      | 8.649       | 8.947     |
| hsa-miR-4254    | 3.77E-12   | 8.57E-12   | 8.610      | 9.134       | 8.483     |
| hsa-miR-3909    | 4.70E-12   | 1.07E-11   | 7.059      | 7.120       | 6.999     |
| hsa-miR-3132    | 4.73E-12   | 1.07E-11   | 7.936      | 7.831       | 7.691     |
| hsa-miR-637     | 4.83E-12   | 1.09E-11   | 7.667      | 7.918       | 7.888     |
| hsa-miR-1276    | 4.97E-12   | 1.12E-11   | 7.910      | 7.773       | 7.782     |
| hsa-miR-3194-5p | 5.18E-12   | 1.17E-11   | 8.974      | 8.684       | 8.727     |
| hsa-miR-30b-5p  | 5.29E-12   | 1.19E-11   | 10899.865  | 14023.704   | 17426.344 |
| hsa-miR-329-3p  | 5.36E-12   | 1.20E-11   | 13.542     | 13.607      | 15.021    |
| hsa-miR-221-5p  | 6.39E-12   | 1.43E-11   | 10.208     | 11.023      | 11.779    |
| hsa-miR-10b-3p  | 6.49E-12   | 1.45E-11   | 8.328      | 8.190       | 8.079     |
| hsa-miR-663a    | 7.71E-12   | 1.72E-11   | 11.648     | 10.654      | 10.392    |
| hsa-miR-3672    | 8.17E-12   | 1.82E-11   | 8.346      | 8.172       | 8.262     |
| hsa-miR-377-5p  | 1.06E-11   | 2.36E-11   | 8.123      | 8.243       | 8.072     |
| hsa-miR-650     | 1.23E-11   | 2.73E-11   | 8.342      | 8.458       | 8.384     |
| hsa-miR-146a-5p | 1.32E-11   | 2.92E-11   | 151.848    | 129.345     | 171.344   |
| hsa-miR-3117-3p | 1.32E-11   | 2.92E-11   | 8.311      | 8.644       | 8.394     |
| hsa-miR-127-5p  | 1.33E-11   | 2.93E-11   | 7.004      | 7.089       | 7.028     |
| hsa-miR-892a    | 1.33E-11   | 2.94E-11   | 8.328      | 8.240       | 8.358     |
| hsa-miR-1247-5p | 1.37E-11   | 3.00E-11   | 7.800      | 7.918       | 7.835     |
| hsa-let-7c-5p   | 1.37E-11   | 3.00E-11   | 2842.786   | 2675.910    | 2252.992  |
| hsa-miR-1277-3p | 1.39E-11   | 3.05E-11   | 8.842      | 8.512       | 8.649     |
| hsa-miR-132-5p  | 1.64E-11   | 3.58E-11   | 9.371      | 9.719       | 9.753     |
| hsa-miR-550a-3p | 1.66E-11   | 3.61E-11   | 1070.925   | 943.273     | 1166.320  |
| hsa-miR-3924    | 1.75E-11   | 3.81E-11   | 8.717      | 8.404       | 8.631     |

| miRNA            | anova_rawp | anova_adjp | median_LCa | median_NTLD | median_OD |
|------------------|------------|------------|------------|-------------|-----------|
| hsa-miR-452-5p   | 1.77E-11   | 3.85E-11   | 7.339      | 7.204       | 7.290     |
| hsa-miR-380-3p   | 2.18E-11   | 4.73E-11   | 8.744      | 8.589       | 8.890     |
| hsa-miR-638      | 2.32E-11   | 5.03E-11   | 84.252     | 79.299      | 74.636    |
| hsa-miR-548s     | 2.73E-11   | 5.91E-11   | 8.011      | 7.895       | 7.934     |
| hsa-miR-1908-5p  | 2.83E-11   | 6.10E-11   | 8.024      | 7.865       | 7.904     |
| hsa-miR-760      | 3.29E-11   | 7.08E-11   | 8.937      | 8.561       | 8.831     |
| hsa-miR-3925-5p  | 4.33E-11   | 9.30E-11   | 7.656      | 7.578       | 7.576     |
| hsa-miR-1207-3p  | 4.58E-11   | 9.83E-11   | 7.953      | 7.986       | 7.927     |
| hsa-miR-3929     | 4.76E-11   | 1.02E-10   | 7.607      | 7.520       | 7.539     |
| hsa-miR-509-5p   | 4.81E-11   | 1.03E-10   | 8.337      | 8.027       | 8.303     |
| hsa-miR-106a-3p  | 5.13E-11   | 1.09E-10   | 8.124      | 8.122       | 8.262     |
| hsa-miR-3920     | 5.51E-11   | 1.17E-10   | 9.238      | 8.960       | 9.234     |
| hsa-miR-654-3p   | 5.64E-11   | 1.20E-10   | 21.329     | 26.486      | 27.089    |
| hsa-miR-3123     | 5.86E-11   | 1.24E-10   | 7.501      | 7.385       | 7.472     |
| hsa-miR-542-3p   | 6.09E-11   | 1.29E-10   | 8.092      | 8.300       | 8.445     |
| hsa-miR-4272     | 6.21E-11   | 1.31E-10   | 7.656      | 7.603       | 7.635     |
| hsa-miR-1206     | 6.67E-11   | 1.41E-10   | 7.930      | 7.818       | 7.911     |
| hsa-miR-223-3p   | 6.88E-11   | 1.45E-10   | 64155.516  | 78654.362   | 78654.362 |
| hsa-miR-576-5p   | 6.94E-11   | 1.46E-10   | 9.529      | 9.753       | 9.825     |
| hsa-miR-920      | 7.06E-11   | 1.48E-10   | 7.019      | 6.922       | 7.019     |
| hsa-miR-802      | 7.09E-11   | 1.49E-10   | 8.083      | 7.965       | 8.067     |
| hsa-miR-200c-3p  | 7.30E-11   | 1.53E-10   | 21.533     | 19.078      | 21.135    |
| hsa-miR-466      | 9.08E-11   | 1.90E-10   | 8.554      | 8.902       | 8.490     |
| hsa-miR-34a-5p   | 9.30E-11   | 1.94E-10   | 15.918     | 16.214      | 16.635    |
| hsa-miR-485-3p   | 9.31E-11   | 1.94E-10   | 21.533     | 21.943      | 18.781    |
| hsa-miR-331-3p   | 1.03E-10   | 2.14E-10   | 8308.735   | 7236.077    | 6332.113  |
| hsa-miR-761      | 1.05E-10   | 2.19E-10   | 7.216      | 7.224       | 7.217     |
| hsa-miR-572      | 1.17E-10   | 2.42E-10   | 11.648     | 13.286      | 11.916    |
| hsa-miR-376a-3p  | 1.24E-10   | 2.57E-10   | 11.916     | 13.225      | 15.918    |
| hsa-miR-3150b-3p | 1.25E-10   | 2.59E-10   | 7.505      | 7.443       | 7.369     |
| hsa-miR-1910-5p  | 1.28E-10   | 2.64E-10   | 8.047      | 8.319       | 8.101     |
| hsa-miR-512-3p   | 1.43E-10   | 2.94E-10   | 8.656      | 8.368       | 8.515     |
| hsa-miR-548d-3p  | 1.52E-10   | 3.13E-10   | 8.157      | 8.300       | 8.337     |
| hsa-miR-3682-3p  | 1.56E-10   | 3.19E-10   | 9.354      | 9.304       | 9.142     |
| hsa-miR-3617-5p  | 1.57E-10   | 3.21E-10   | 7.758      | 7.746       | 7.793     |
| hsa-miR-338-5p   | 1.72E-10   | 3.51E-10   | 8.052      | 8.004       | 8.204     |
| hsa-miR-758-3p   | 1.76E-10   | 3.58E-10   | 9.594      | 10.069      | 10.234    |
| hsa-miR-141-5p   | 1.81E-10   | 3.68E-10   | 7.308      | 7.296       | 7.396     |
| hsa-miR-1246     | 1.88E-10   | 3.82E-10   | 47.423     | 45.106      | 41.669    |

| miRNA            | anova_rawp | anova_adjp | median_LCa | median_NTLD | median_OD |
|------------------|------------|------------|------------|-------------|-----------|
| hsa-miR-30e-3p   | 2.01E-10   | 4.08E-10   | 132.276    | 138.532     | 132.276   |
| hsa-miR-224-5p   | 2.01E-10   | 4.08E-10   | 9.522      | 9.639       | 10.623    |
| hsa-miR-3146     | 2.10E-10   | 4.25E-10   | 7.460      | 7.416       | 7.472     |
| hsa-miR-450b-3p  | 2.26E-10   | 4.56E-10   | 8.378      | 8.223       | 8.437     |
| hsa-miR-3928-3p  | 2.32E-10   | 4.67E-10   | 7.359      | 7.463       | 7.398     |
| hsa-miR-892b     | 2.51E-10   | 5.04E-10   | 18.564     | 16.014      | 15.821    |
| hsa-miR-3116     | 2.56E-10   | 5.15E-10   | 7.322      | 7.254       | 7.321     |
| hsa-miR-4258     | 3.45E-10   | 6.93E-10   | 7.856      | 8.020       | 7.892     |
| hsa-miR-323a-3p  | 3.49E-10   | 6.99E-10   | 12.218     | 11.482      | 12.545    |
| hsa-miR-147b     | 3.50E-10   | 6.99E-10   | 7.611      | 7.726       | 7.746     |
| hsa-miR-563      | 3.71E-10   | 7.39E-10   | 14.014     | 15.021      | 14.459    |
| hsa-miR-2116-5p  | 3.74E-10   | 7.44E-10   | 7.918      | 7.851       | 7.950     |
| hsa-miR-92a-3p   | 3.82E-10   | 7.60E-10   | 78654.360  | 64155.520   | 64155.520 |
| hsa-miR-520h     | 4.11E-10   | 8.17E-10   | 8.290      | 8.374       | 8.494     |
| hsa-miR-4322     | 4.12E-10   | 8.17E-10   | 7.641      | 7.539       | 7.749     |
| hsa-miR-3713     | 4.29E-10   | 8.49E-10   | 7.488      | 7.623       | 7.482     |
| hsa-miR-371a-5p  | 4.39E-10   | 8.67E-10   | 9.502      | 9.061       | 9.224     |
| hsa-miR-3655     | 4.48E-10   | 8.84E-10   | 7.446      | 7.578       | 7.546     |
| hsa-miR-31-3p    | 4.74E-10   | 9.32E-10   | 8.074      | 8.047       | 8.109     |
| hsa-miR-1271-5p  | 4.85E-10   | 9.53E-10   | 30.981     | 27.739      | 33.527    |
| hsa-miR-561-3p   | 5.03E-10   | 9.87E-10   | 7.838      | 7.693       | 7.728     |
| hsa-miR-301b-3p  | 5.12E-10   | 1.00E-09   | 8.069      | 8.169       | 8.138     |
| hsa-miR-3164     | 5.34E-10   | 1.04E-09   | 8.392      | 8.182       | 8.340     |
| hsa-miR-3622a-5p | 5.37E-10   | 1.05E-09   | 7.242      | 7.171       | 7.217     |
| hsa-miR-302c-5p  | 5.88E-10   | 1.15E-09   | 7.035      | 7.198       | 7.046     |
| hsa-miR-602      | 6.77E-10   | 1.32E-09   | 15.728     | 16.854      | 15.021    |
| hsa-miR-4305     | 6.84E-10   | 1.33E-09   | 7.599      | 7.804       | 7.715     |
| hsa-miR-625-3p   | 7.11E-10   | 1.38E-09   | 14.459     | 13.737      | 14.231    |
| hsa-miR-382-5p   | 7.38E-10   | 1.43E-09   | 8.927      | 9.224       | 9.214     |
| hsa-miR-2053     | 7.53E-10   | 1.46E-09   | 9.224      | 8.896       | 9.169     |
| hsa-miR-3607-5p  | 7.89E-10   | 1.52E-09   | 8.188      | 8.196       | 8.243     |
| hsa-miR-3685     | 8.32E-10   | 1.60E-09   | 8.814      | 8.689       | 8.896     |
| hsa-miR-3133     | 8.41E-10   | 1.62E-09   | 8.927      | 8.782       | 9.109     |
| hsa-miR-4264     | 8.78E-10   | 1.69E-09   | 7.650      | 7.623       | 7.720     |
| hsa-miR-557      | 9.93E-10   | 1.90E-09   | 10.782     | 11.023      | 10.685    |
| hsa-miR-4326     | 1.18E-09   | 2.26E-09   | 12.705     | 12.393      | 11.779    |
| hsa-miR-3180-5p  | 1.27E-09   | 2.42E-09   | 14.617     | 14.776      | 14.305    |
| hsa-miR-363-5p   | 1.33E-09   | 2.54E-09   | 8.731      | 8.479       | 8.741     |
| hsa-miR-1270     | 1.57E-09   | 2.98E-09   | 11.544     | 10.883      | 11.023    |

| miRNA            | anova_rawp | anova_adjp | median_LCa | median_NTLD | median_OD  |
|------------------|------------|------------|------------|-------------|------------|
| hsa-miR-524-3p   | 1.59E-09   | 3.03E-09   | 7.882      | 8.122       | 8.006      |
| hsa-miR-484      | 1.69E-09   | 3.22E-09   | 3662.829   | 2842.786    | 3215.214   |
| hsa-miR-1193     | 1.81E-09   | 3.43E-09   | 7.042      | 7.120       | 7.023      |
| hsa-miR-34a-3p   | 1.84E-09   | 3.48E-09   | 7.979      | 7.996       | 8.049      |
| hsa-miR-744-3p   | 1.89E-09   | 3.57E-09   | 10.149     | 10.312      | 10.623     |
| hsa-miR-186-3p   | 2.04E-09   | 3.84E-09   | 8.701      | 8.741       | 8.860      |
| hsa-miR-708-3p   | 2.31E-09   | 4.36E-09   | 7.472      | 7.423       | 7.506      |
| hsa-miR-1238-3p  | 2.36E-09   | 4.44E-09   | 27.089     | 28.071      | 26.187     |
| hsa-miR-3180     | 2.53E-09   | 4.76E-09   | 6.979      | 7.042       | 6.957      |
| hsa-miR-1298-5p  | 2.55E-09   | 4.78E-09   | 7.248      | 7.293       | 7.217      |
| hsa-miR-499a-5p  | 3.50E-09   | 6.54E-09   | 8.365      | 8.462       | 8.527      |
| hsa-miR-647      | 3.62E-09   | 6.76E-09   | 8.106      | 8.343       | 8.094      |
| hsa-miR-3622b-5p | 3.68E-09   | 6.88E-09   | 7.828      | 7.851       | 7.751      |
| hsa-miR-556-3p   | 3.74E-09   | 6.97E-09   | 9.315      | 9.015       | 9.395      |
| hsa-miR-3614-5p  | 3.78E-09   | 7.04E-09   | 17.565     | 17.565      | 16.114     |
| hsa-miR-3136-5p  | 3.92E-09   | 7.27E-09   | 8.223      | 8.280       | 8.074      |
| hsa-let-7e-3p    | 3.99E-09   | 7.40E-09   | 8.089      | 8.319       | 8.180      |
| hsa-miR-607      | 4.18E-09   | 7.74E-09   | 8.479      | 8.346       | 8.515      |
| hsa-miR-501-3p   | 4.34E-09   | 8.01E-09   | 68.849     | 57.679      | 61.140     |
| hsa-miR-4290     | 4.37E-09   | 8.07E-09   | 9.151      | 10.025      | 9.125      |
| hsa-miR-129-5p   | 4.41E-09   | 8.12E-09   | 7.780      | 7.941       | 7.876      |
| hsa-miR-451a     | 4.44E-09   | 8.17E-09   | 232198.514 | 232198.514  | 232198.514 |
| hsa-miR-1914-5p  | 4.78E-09   | 8.78E-09   | 8.081      | 8.292       | 8.161      |
| hsa-miR-191-3p   | 4.84E-09   | 8.87E-09   | 23.634     | 25.340      | 23.757     |
| hsa-miR-634      | 4.93E-09   | 9.03E-09   | 12.842     | 12.870      | 12.985     |
| hsa-miR-1226-3p  | 4.97E-09   | 9.08E-09   | 7.645      | 7.578       | 7.630      |
| hsa-miR-425-3p   | 5.30E-09   | 9.68E-09   | 25.340     | 25.340      | 24.011     |
| hsa-miR-3615     | 5.70E-09   | 1.04E-08   | 9.834      | 9.457       | 9.508      |
| hsa-miR-4310     | 5.91E-09   | 1.08E-08   | 19.631     | 20.392      | 19.547     |
| hsa-miR-339-5p   | 6.02E-09   | 1.09E-08   | 31.370     | 37.514      | 32.627     |
| hsa-miR-526b-5p  | 6.22E-09   | 1.13E-08   | 8.063      | 8.049       | 7.977      |
| hsa-miR-518a-3p  | 6.54E-09   | 1.18E-08   | 8.129      | 8.274       | 8.271      |
| hsa-miR-3144-5p  | 6.69E-09   | 1.21E-08   | 7.374      | 7.233       | 7.383      |
| hsa-miR-642a-5p  | 7.31E-09   | 1.32E-08   | 8.126      | 7.969       | 8.138      |
| hsa-miR-586      | 7.87E-09   | 1.42E-08   | 8.254      | 8.067       | 8.140      |
| hsa-miR-105-3p   | 7.98E-09   | 1.44E-08   | 7.862      | 7.784       | 7.758      |
| hsa-miR-1204     | 9.28E-09   | 1.67E-08   | 8.068      | 8.096       | 8.153      |
| hsa-miR-514a-3p  | 9.31E-09   | 1.67E-08   | 7.773      | 7.693       | 7.717      |
| hsa-miR-3182     | 9.65E-09   | 1.73E-08   | 7.864      | 7.826       | 7.771      |

| miRNA            | anova_rawp | anova_adjp | median_LCa | median_NTLD | median_OD |
|------------------|------------|------------|------------|-------------|-----------|
| hsa-miR-3671     | 1.02E-08   | 1.83E-08   | 7.851      | 7.874       | 7.948     |
| hsa-miR-487a-3p  | 1.06E-08   | 1.90E-08   | 7.932      | 8.101       | 8.204     |
| hsa-miR-298      | 1.07E-08   | 1.91E-08   | 7.418      | 7.558       | 7.520     |
| hsa-miR-3131     | 1.16E-08   | 2.07E-08   | 7.298      | 7.208       | 7.161     |
| hsa-miR-4278     | 1.19E-08   | 2.12E-08   | 7.033      | 7.171       | 7.033     |
| hsa-miR-7-2-3p   | 1.20E-08   | 2.14E-08   | 8.457      | 8.550       | 8.667     |
| hsa-miR-593-3p   | 1.21E-08   | 2.15E-08   | 7.876      | 8.109       | 8.023     |
| hsa-miR-558      | 1.22E-08   | 2.15E-08   | 7.761      | 7.706       | 7.831     |
| hsa-miR-3065-3p  | 1.36E-08   | 2.40E-08   | 7.698      | 7.639       | 7.744     |
| hsa-miR-541-5p   | 1.37E-08   | 2.42E-08   | 7.610      | 7.793       | 7.641     |
| hsa-miR-154-5p   | 1.47E-08   | 2.59E-08   | 13.195     | 15.367      | 14.776    |
| hsa-miR-3683     | 1.60E-08   | 2.82E-08   | 7.742      | 7.675       | 7.800     |
| hsa-miR-369-3p   | 1.70E-08   | 2.99E-08   | 8.814      | 8.644       | 8.837     |
| hsa-miR-508-3p   | 1.73E-08   | 3.04E-08   | 7.789      | 7.749       | 7.749     |
| hsa-miR-198      | 1.84E-08   | 3.23E-08   | 7.308      | 7.132       | 7.168     |
| hsa-miR-485-5p   | 1.98E-08   | 3.46E-08   | 7.803      | 7.709       | 7.700     |
| hsa-miR-3163     | 1.98E-08   | 3.46E-08   | 14.231     | 13.414      | 16.315    |
| hsa-miR-3919     | 2.01E-08   | 3.51E-08   | 7.423      | 7.361       | 7.436     |
| hsa-miR-4283     | 2.12E-08   | 3.70E-08   | 7.130      | 7.217       | 7.178     |
| hsa-miR-27a-5p   | 2.27E-08   | 3.95E-08   | 7.310      | 7.251       | 7.337     |
| hsa-miR-3173-3p  | 2.34E-08   | 4.07E-08   | 7.939      | 7.795       | 7.802     |
| hsa-miR-3196     | 2.49E-08   | 4.32E-08   | 43.689     | 35.938      | 37.514    |
| hsa-miR-500a-5p  | 2.62E-08   | 4.54E-08   | 50.779     | 46.636      | 51.683    |
| hsa-miR-520a-5p  | 2.90E-08   | 5.01E-08   | 7.720      | 7.682       | 7.664     |
| hsa-miR-1254     | 2.99E-08   | 5.16E-08   | 7.809      | 7.633       | 7.635     |
| hsa-miR-4311     | 3.08E-08   | 5.32E-08   | 7.348      | 7.220       | 7.318     |
| hsa-miR-891b     | 3.33E-08   | 5.74E-08   | 8.417      | 8.365       | 8.462     |
| hsa-miR-3150a-3p | 3.82E-08   | 6.56E-08   | 7.277      | 7.326       | 7.233     |
| hsa-miR-99b-3p   | 3.88E-08   | 6.66E-08   | 8.006      | 8.052       | 7.962     |
| hsa-miR-3200-3p  | 3.97E-08   | 6.80E-08   | 26.486     | 31.370      | 31.370    |
| hsa-miR-1827     | 3.97E-08   | 6.80E-08   | 7.724      | 7.753       | 7.802     |
| hsa-miR-941      | 4.00E-08   | 6.83E-08   | 6.774      | 6.676       | 6.704     |
| hsa-miR-599      | 4.32E-08   | 7.38E-08   | 7.907      | 7.795       | 7.934     |
| hsa-miR-493-5p   | 4.36E-08   | 7.44E-08   | 8.587      | 8.837       | 8.878     |
| hsa-miR-3151-5p  | 4.45E-08   | 7.58E-08   | 7.278      | 7.345       | 7.313     |
| hsa-miR-34b-3p   | 4.46E-08   | 7.58E-08   | 9.214      | 9.579       | 9.253     |
| hsa-miR-3943     | 4.57E-08   | 7.76E-08   | 8.192      | 8.331       | 8.286     |
| hsa-miR-644a     | 4.93E-08   | 8.35E-08   | 7.528      | 7.652       | 7.527     |
| hsa-miR-3613-3p  | 5.18E-08   | 8.76E-08   | 15.543     | 15.543      | 15.918    |

| miRNA            | anova_rawp | anova_adjp | median_LCa | median_NTLD | median_OD |
|------------------|------------|------------|------------|-------------|-----------|
| hsa-miR-222-5p   | 5.42E-08   | 9.17E-08   | 7.495      | 7.489       | 7.569     |
| hsa-miR-372-3p   | 5.56E-08   | 9.38E-08   | 7.724      | 7.802       | 7.842     |
| hsa-miR-891a-5p  | 5.78E-08   | 9.74E-08   | 7.552      | 7.541       | 7.646     |
| hsa-miR-3915     | 5.91E-08   | 9.95E-08   | 7.864      | 7.742       | 7.780     |
| hsa-miR-662      | 6.20E-08   | 1.04E-07   | 8.302      | 8.220       | 8.140     |
| hsa-miR-614      | 6.56E-08   | 1.10E-07   | 7.780      | 7.909       | 7.764     |
| hsa-miR-223-5p   | 6.93E-08   | 1.16E-07   | 9.623      | 9.962       | 10.392    |
| hsa-miR-615-3p   | 7.01E-08   | 1.17E-07   | 8.201      | 8.561       | 8.292     |
| hsa-miR-569      | 7.07E-08   | 1.18E-07   | 7.743      | 7.661       | 7.769     |
| hsa-miR-936      | 7.40E-08   | 1.23E-07   | 8.395      | 7.977       | 8.234     |
| hsa-miR-339-3p   | 7.65E-08   | 1.27E-07   | 17.565     | 17.081      | 16.744    |
| hsa-miR-25-3p    | 7.91E-08   | 1.32E-07   | 51566.010  | 41952.033   | 41952.033 |
| hsa-miR-510-5p   | 8.26E-08   | 1.37E-07   | 7.314      | 7.298       | 7.393     |
| hsa-miR-2116-3p  | 8.65E-08   | 1.43E-07   | 19.078     | 20.048      | 18.640    |
| hsa-miR-942-5p   | 8.95E-08   | 1.48E-07   | 135.366    | 110.679     | 144.963   |
| hsa-miR-937-3p   | 9.34E-08   | 1.55E-07   | 8.434      | 8.777       | 8.565     |
| hsa-miR-1203     | 9.69E-08   | 1.60E-07   | 7.765      | 7.835       | 7.762     |
| hsa-miR-655-3p   | 1.00E-07   | 1.65E-07   | 8.309      | 8.404       | 8.462     |
| hsa-miR-4256     | 1.08E-07   | 1.78E-07   | 7.518      | 7.441       | 7.418     |
| hsa-miR-99a-3p   | 1.10E-07   | 1.80E-07   | 7.655      | 7.784       | 7.717     |
| hsa-miR-1278     | 1.10E-07   | 1.80E-07   | 8.720      | 8.598       | 8.777     |
| hsa-miR-3923     | 1.15E-07   | 1.88E-07   | 8.490      | 8.286       | 8.343     |
| hsa-miR-92a-2-5p | 1.17E-07   | 1.91E-07   | 8.002      | 7.979       | 8.015     |
| hsa-miR-3621     | 1.18E-07   | 1.93E-07   | 7.658      | 7.567       | 7.700     |
| hsa-miR-4300     | 1.18E-07   | 1.94E-07   | 7.480      | 7.525       | 7.506     |
| hsa-miR-548w     | 1.19E-07   | 1.95E-07   | 7.845      | 8.172       | 7.986     |
| hsa-miR-574-5p   | 1.28E-07   | 2.09E-07   | 71.701     | 66.151      | 52.624    |
| hsa-miR-383-5p   | 1.36E-07   | 2.22E-07   | 7.551      | 7.426       | 7.583     |
| hsa-miR-146b-3p  | 1.40E-07   | 2.28E-07   | 7.396      | 7.520       | 7.541     |
| hsa-miR-433-3p   | 1.43E-07   | 2.32E-07   | 7.786      | 7.865       | 7.706     |
| hsa-miR-421      | 1.48E-07   | 2.39E-07   | 12.145     | 12.242      | 12.870    |
| hsa-miR-576-3p   | 1.50E-07   | 2.43E-07   | 7.716      | 7.585       | 7.702     |
| hsa-miR-550a-5p  | 1.53E-07   | 2.47E-07   | 19.879     | 19.714      | 19.387    |
| hsa-miR-548l     | 1.57E-07   | 2.54E-07   | 7.503      | 7.650       | 7.525     |
| hsa-miR-1250-5p  | 1.60E-07   | 2.58E-07   | 7.754      | 7.802       | 7.791     |
| hsa-miR-3667-5p  | 1.63E-07   | 2.62E-07   | 30.191     | 30.981      | 26.778    |
| hsa-miR-135a-5p  | 1.65E-07   | 2.65E-07   | 9.134      | 9.038       | 9.315     |
| hsa-miR-3183     | 1.77E-07   | 2.84E-07   | 6.841      | 6.837       | 6.829     |
| hsa-miR-4267     | 1.83E-07   | 2.94E-07   | 7.161      | 7.211       | 7.139     |

| miRNA            | anova_rawp | anova_adjp | median_LCa | median_NTLD | median_OD |
|------------------|------------|------------|------------|-------------|-----------|
| hsa-miR-4304     | 2.09E-07   | 3.34E-07   | 7.751      | 7.890       | 7.775     |
| hsa-miR-500b-5p  | 2.12E-07   | 3.38E-07   | 47.029     | 43.689      | 42.334    |
| hsa-miR-4317     | 2.14E-07   | 3.41E-07   | 22.153     | 20.756      | 24.269    |
| hsa-miR-455-5p   | 2.17E-07   | 3.46E-07   | 7.865      | 8.025       | 7.934     |
| hsa-miR-92b-5p   | 2.21E-07   | 3.52E-07   | 7.014      | 6.979       | 7.046     |
| hsa-miR-885-3p   | 2.38E-07   | 3.78E-07   | 6.973      | 6.934       | 7.004     |
| hsa-miR-4262     | 2.61E-07   | 4.15E-07   | 7.724      | 7.728       | 7.804     |
| hsa-miR-4301     | 2.65E-07   | 4.21E-07   | 8.257      | 8.259       | 8.334     |
| hsa-miR-296-3p   | 2.79E-07   | 4.42E-07   | 7.039      | 7.084       | 7.033     |
| hsa-miR-215-5p   | 2.90E-07   | 4.59E-07   | 1070.925   | 1391.284    | 1520.100  |
| hsa-miR-3681-5p  | 3.06E-07   | 4.84E-07   | 7.219      | 7.217       | 7.120     |
| hsa-miR-636      | 3.17E-07   | 5.00E-07   | 11.916     | 12.099      | 11.323    |
| hsa-miR-1279     | 3.77E-07   | 5.93E-07   | 8.602      | 8.530       | 8.619     |
| hsa-miR-597-5p   | 3.77E-07   | 5.93E-07   | 7.505      | 7.644       | 7.501     |
| hsa-miR-877-5p   | 3.78E-07   | 5.93E-07   | 7.551      | 7.421       | 7.503     |
| hsa-miR-4315     | 3.79E-07   | 5.95E-07   | 8.094      | 7.989       | 8.015     |
| hsa-miR-508-5p   | 3.89E-07   | 6.10E-07   | 7.231      | 7.372       | 7.263     |
| hsa-miR-616-3p   | 4.03E-07   | 6.31E-07   | 7.084      | 6.994       | 7.050     |
| hsa-miR-134-5p   | 4.05E-07   | 6.33E-07   | 15.821     | 14.382      | 15.021    |
| hsa-miR-411-5p   | 4.28E-07   | 6.68E-07   | 7.791      | 7.706       | 7.773     |
| hsa-miR-509-3-5p | 4.38E-07   | 6.82E-07   | 7.712      | 7.659       | 7.680     |
| hsa-miR-549a     | 4.53E-07   | 7.05E-07   | 7.890      | 7.845       | 7.920     |
| hsa-miR-518e-3p  | 4.79E-07   | 7.45E-07   | 7.837      | 7.962       | 7.826     |
| hsa-miR-512-5p   | 5.02E-07   | 7.78E-07   | 7.791      | 7.804       | 7.829     |
| hsa-miR-661      | 5.02E-07   | 7.78E-07   | 7.630      | 7.742       | 7.668     |
| hsa-miR-1299     | 5.08E-07   | 7.86E-07   | 10.365     | 9.284       | 9.495     |
| hsa-miR-515-3p   | 5.72E-07   | 8.84E-07   | 8.710      | 8.837       | 8.921     |
| hsa-miR-1287-5p  | 5.74E-07   | 8.87E-07   | 9.117      | 9.482       | 9.061     |
| hsa-miR-3666     | 5.80E-07   | 8.95E-07   | 7.561      | 7.527       | 7.592     |
| hsa-miR-593-5p   | 5.86E-07   | 9.03E-07   | 7.181      | 7.150       | 7.208     |
| hsa-miR-105-5p   | 5.94E-07   | 9.14E-07   | 7.639      | 7.773       | 7.711     |
| hsa-miR-409-5p   | 5.99E-07   | 9.20E-07   | 9.671      | 9.736       | 10.003    |
| hsa-miR-200b-5p  | 6.00E-07   | 9.20E-07   | 7.181      | 7.220       | 7.185     |
| hsa-miR-1468-5p  | 6.26E-07   | 9.60E-07   | 7.332      | 7.388       | 7.403     |
| hsa-miR-548k     | 6.69E-07   | 1.02E-06   | 8.072      | 8.201       | 8.204     |
| hsa-miR-187-5p   | 6.81E-07   | 1.04E-06   | 7.236      | 7.076       | 7.208     |
| hsa-miR-938      | 7.02E-07   | 1.07E-06   | 7.181      | 7.097       | 7.191     |
| hsa-miR-1913     | 7.07E-07   | 1.08E-06   | 7.823      | 7.979       | 7.789     |
| hsa-miR-511-5p   | 7.37E-07   | 1.12E-06   | 7.948      | 7.911       | 7.892     |

| miRNA           | anova_rawp | anova_adjp | median_LCa | median_NTLD | median_OD |
|-----------------|------------|------------|------------|-------------|-----------|
| hsa-miR-1273a   | 7.52E-07   | 1.14E-06   | 8.164      | 8.143       | 8.114     |
| hsa-miR-4303    | 7.90E-07   | 1.20E-06   | 7.505      | 7.416       | 7.443     |
| hsa-miR-4260    | 8.30E-07   | 1.26E-06   | 7.426      | 7.438       | 7.428     |
| hsa-miR-376a-5p | 8.43E-07   | 1.28E-06   | 9.911      | 10.208      | 10.392    |
| hsa-miR-217     | 9.23E-07   | 1.40E-06   | 7.026      | 6.994       | 7.037     |
| hsa-miR-181a-3p | 9.57E-07   | 1.45E-06   | 15.237     | 17.687      | 17.199    |
| hsa-miR-939-5p  | 9.60E-07   | 1.45E-06   | 48.215     | 49.921      | 39.200    |
| hsa-miR-1200    | 9.90E-07   | 1.49E-06   | 7.599      | 7.623       | 7.551     |
| hsa-miR-345-5p  | 1.04E-06   | 1.57E-06   | 9.579      | 10.047      | 10.312    |
| hsa-miR-3678-3p | 1.05E-06   | 1.58E-06   | 7.110      | 7.191       | 7.198     |
| hsa-miR-99a-5p  | 1.08E-06   | 1.62E-06   | 58.769     | 54.560      | 67.442    |
| hsa-miR-544b    | 1.11E-06   | 1.66E-06   | 8.060      | 8.025       | 8.057     |
| hsa-miR-516a-5p | 1.12E-06   | 1.68E-06   | 8.488      | 8.288       | 8.346     |
| hsa-miR-133b    | 1.16E-06   | 1.74E-06   | 25.063     | 22.153      | 25.893    |
| hsa-miR-3927-3p | 1.17E-06   | 1.75E-06   | 7.963      | 7.842       | 7.902     |
| hsa-miR-412-3p  | 1.31E-06   | 1.95E-06   | 7.383      | 7.485       | 7.385     |
| hsa-miR-1292-5p | 1.36E-06   | 2.03E-06   | 7.716      | 7.700       | 7.818     |
| hsa-miR-10a-3p  | 1.38E-06   | 2.05E-06   | 7.566      | 7.503       | 7.571     |
| hsa-miR-2117    | 1.40E-06   | 2.07E-06   | 7.666      | 7.666       | 7.621     |
| hsa-miR-328-3p  | 1.47E-06   | 2.18E-06   | 38.348     | 33.992      | 30.191    |
| hsa-miR-3908    | 1.51E-06   | 2.24E-06   | 7.898      | 7.807       | 7.840     |
| hsa-miR-3120-3p | 1.52E-06   | 2.26E-06   | 9.413      | 8.896       | 9.753     |
| hsa-miR-4285    | 1.55E-06   | 2.29E-06   | 7.310      | 7.211       | 7.257     |
| hsa-miR-3160-3p | 1.63E-06   | 2.41E-06   | 7.437      | 7.523       | 7.463     |
| hsa-miR-3663-5p | 2.11E-06   | 3.12E-06   | 7.501      | 7.623       | 7.560     |
| hsa-miR-759     | 2.13E-06   | 3.13E-06   | 7.703      | 7.644       | 7.693     |
| hsa-miR-194-5p  | 2.27E-06   | 3.34E-06   | 1218.673   | 1218.673    | 1589.540  |
| hsa-miR-125b-5p | 2.31E-06   | 3.40E-06   | 285.644    | 247.251     | 261.772   |
| hsa-miR-3192-5p | 2.40E-06   | 3.52E-06   | 7.303      | 7.337       | 7.401     |
| hsa-miR-367-5p  | 2.47E-06   | 3.62E-06   | 8.546      | 8.417       | 8.417     |
| hsa-miR-190b    | 2.47E-06   | 3.62E-06   | 8.349      | 8.169       | 8.331     |
| hsa-miR-579-3p  | 2.70E-06   | 3.94E-06   | 8.047      | 8.087       | 8.138     |
| hsa-miR-3199    | 2.81E-06   | 4.10E-06   | 7.822      | 7.744       | 7.780     |
| hsa-miR-889-3p  | 2.99E-06   | 4.37E-06   | 8.130      | 8.125       | 8.209     |
| hsa-miR-623     | 3.18E-06   | 4.63E-06   | 8.479      | 8.265       | 8.384     |
| hsa-miR-496     | 3.51E-06   | 5.11E-06   | 8.104      | 8.204       | 8.262     |
| hsa-miR-3185    | 3.88E-06   | 5.63E-06   | 7.269      | 7.343       | 7.396     |
| hsa-miR-1197    | 3.93E-06   | 5.71E-06   | 7.978      | 8.074       | 8.059     |
| hsa-miR-211-5p  | 4.00E-06   | 5.79E-06   | 11.362     | 11.210      | 10.987    |



| miRNA            | anova_rawp | anova_adjp | median_LCa | median_NTLD | median_OD |
|------------------|------------|------------|------------|-------------|-----------|
| hsa-miR-767-3p   | 4.23E-06   | 6.12E-06   | 10.866     | 10.953      | 10.849    |
| hsa-miR-591      | 4.29E-06   | 6.21E-06   | 7.753      | 7.881       | 7.840     |
| hsa-miR-2278     | 4.39E-06   | 6.35E-06   | 7.928      | 8.180       | 7.888     |
| hsa-miR-624-3p   | 4.77E-06   | 6.89E-06   | 8.118      | 8.087       | 8.201     |
| hsa-miR-4277     | 5.28E-06   | 7.61E-06   | 7.637      | 7.661       | 7.728     |
| hsa-miR-1911-5p  | 5.49E-06   | 7.90E-06   | 7.532      | 7.623       | 7.617     |
| hsa-miR-346      | 5.55E-06   | 7.98E-06   | 8.553      | 8.767       | 8.512     |
| hsa-miR-216a-5p  | 6.57E-06   | 9.43E-06   | 7.251      | 7.269       | 7.275     |
| hsa-miR-517-5p   | 6.65E-06   | 9.53E-06   | 7.657      | 7.700       | 7.726     |
| hsa-miR-3684     | 6.67E-06   | 9.55E-06   | 7.848      | 7.948       | 7.904     |
| hsa-miR-4261     | 6.70E-06   | 9.59E-06   | 12.651     | 11.060      | 11.565    |
| hsa-miR-490-3p   | 6.92E-06   | 9.87E-06   | 7.645      | 7.599       | 7.590     |
| hsa-miR-196a-3p  | 6.92E-06   | 9.87E-06   | 7.613      | 7.610       | 7.633     |
| hsa-miR-1825     | 7.38E-06   | 1.05E-05   | 23.511     | 25.063      | 22.594    |
| hsa-miR-1469     | 7.73E-06   | 1.10E-05   | 7.799      | 7.680       | 7.693     |
| hsa-miR-3174     | 8.34E-06   | 1.19E-05   | 8.138      | 8.027       | 8.001     |
| hsa-miR-944      | 8.48E-06   | 1.20E-05   | 8.036      | 7.881       | 7.981     |
| hsa-miR-29b-1-5p | 8.54E-06   | 1.21E-05   | 11.323     | 12.053      | 12.242    |
| hsa-miR-488-5p   | 8.64E-06   | 1.22E-05   | 8.317      | 8.328       | 8.378     |
| hsa-miR-302d-5p  | 8.98E-06   | 1.27E-05   | 6.957      | 6.999       | 6.962     |
| hsa-miR-3142     | 9.22E-06   | 1.30E-05   | 7.841      | 7.802       | 7.771     |
| hsa-miR-718      | 9.54E-06   | 1.35E-05   | 7.969      | 7.769       | 7.824     |
| hsa-miR-3680-3p  | 9.77E-06   | 1.38E-05   | 8.326      | 8.204       | 8.394     |
| hsa-miR-1265     | 1.02E-05   | 1.43E-05   | 7.730      | 7.777       | 7.829     |
| hsa-miR-3681-3p  | 1.03E-05   | 1.45E-05   | 8.417      | 8.585       | 8.479     |
| hsa-miR-214-5p   | 1.05E-05   | 1.48E-05   | 7.851      | 7.886       | 7.851     |
| hsa-miR-548t-5p  | 1.08E-05   | 1.51E-05   | 7.782      | 8.018       | 7.994     |
| hsa-miR-1539     | 1.18E-05   | 1.65E-05   | 19.879     | 20.217      | 19.547    |
| hsa-miR-202-5p   | 1.24E-05   | 1.74E-05   | 9.069      | 9.001       | 9.134     |
| hsa-miR-519e-3p  | 1.27E-05   | 1.78E-05   | 8.724      | 8.761       | 8.746     |
| hsa-miR-4276     | 1.28E-05   | 1.79E-05   | 7.420      | 7.375       | 7.441     |
| hsa-miR-3153     | 1.29E-05   | 1.81E-05   | 7.293      | 7.356       | 7.307     |
| hsa-miR-3187-3p  | 1.31E-05   | 1.82E-05   | 6.922      | 6.853       | 6.962     |
| hsa-miR-555      | 1.40E-05   | 1.95E-05   | 7.792      | 7.802       | 7.780     |
| hsa-miR-4266     | 1.41E-05   | 1.96E-05   | 6.991      | 7.046       | 6.957     |
| hsa-miR-627-5p   | 1.45E-05   | 2.02E-05   | 46.253     | 51.683      | 62.300    |
| hsa-miR-585-3p   | 1.53E-05   | 2.12E-05   | 7.703      | 7.826       | 7.804     |
| hsa-miR-1293     | 1.60E-05   | 2.22E-05   | 7.499      | 7.511       | 7.480     |
| hsa-miR-34b-5p   | 1.69E-05   | 2.34E-05   | 9.160      | 9.294       | 9.360     |

| miRNA            | anova_rawp | anova_adjp | median_LCa | median_NTLD | median_OD |
|------------------|------------|------------|------------|-------------|-----------|
| hsa-miR-200c-5p  | 1.85E-05   | 2.56E-05   | 7.828      | 7.913       | 7.888     |
| hsa-miR-370-3p   | 1.99E-05   | 2.74E-05   | 8.185      | 8.209       | 8.042     |
| hsa-miR-588      | 2.04E-05   | 2.81E-05   | 7.684      | 7.720       | 7.807     |
| hsa-miR-3149     | 2.14E-05   | 2.95E-05   | 9.550      | 9.825       | 9.326     |
| hsa-miR-513c-5p  | 2.21E-05   | 3.03E-05   | 9.728      | 9.326       | 9.469     |
| hsa-miR-1915-5p  | 2.21E-05   | 3.04E-05   | 7.413      | 7.438       | 7.318     |
| hsa-miR-517a-3p  | 2.26E-05   | 3.10E-05   | 8.101      | 8.143       | 8.204     |
| hsa-miR-1227-3p  | 2.32E-05   | 3.18E-05   | 11.482     | 11.441      | 11.523    |
| hsa-miR-1912     | 2.33E-05   | 3.19E-05   | 7.174      | 7.109       | 7.174     |
| hsa-miR-513b-5p  | 2.38E-05   | 3.25E-05   | 12.268     | 12.443      | 12.053    |
| hsa-miR-18b-3p   | 2.40E-05   | 3.28E-05   | 10.115     | 10.285      | 10.475    |
| hsa-miR-548x-3p  | 2.45E-05   | 3.34E-05   | 8.744      | 8.703       | 8.787     |
| hsa-miR-3678-5p  | 2.53E-05   | 3.44E-05   | 7.902      | 7.870       | 7.960     |
| hsa-miR-4275     | 2.53E-05   | 3.45E-05   | 8.338      | 8.428       | 8.381     |
| hsa-miR-185-3p   | 2.87E-05   | 3.90E-05   | 8.043      | 8.215       | 8.140     |
| hsa-miR-3166     | 2.92E-05   | 3.97E-05   | 7.865      | 7.918       | 7.934     |
| hsa-miR-1184     | 2.93E-05   | 3.97E-05   | 7.703      | 7.813       | 7.758     |
| hsa-miR-374b-3p  | 3.09E-05   | 4.19E-05   | 8.494      | 8.407       | 8.486     |
| hsa-miR-3148     | 3.22E-05   | 4.35E-05   | 8.196      | 8.465       | 8.156     |
| hsa-miR-4308     | 3.30E-05   | 4.46E-05   | 8.143      | 8.251       | 8.240     |
| hsa-miR-548h-5p  | 3.32E-05   | 4.48E-05   | 7.621      | 7.762       | 7.659     |
| hsa-miR-3139     | 3.32E-05   | 4.48E-05   | 7.630      | 7.659       | 7.607     |
| hsa-miR-340-3p   | 3.41E-05   | 4.60E-05   | 133.821    | 148.386     | 163.148   |
| hsa-miR-19a-5p   | 3.48E-05   | 4.68E-05   | 8.189      | 8.161       | 8.081     |
| hsa-miR-449c-5p  | 3.54E-05   | 4.76E-05   | 7.344      | 7.436       | 7.418     |
| hsa-miR-4292     | 3.74E-05   | 5.02E-05   | 6.940      | 7.055       | 6.957     |
| hsa-miR-1205     | 3.82E-05   | 5.12E-05   | 7.241      | 7.278       | 7.332     |
| hsa-miR-19b-2-5p | 3.85E-05   | 5.15E-05   | 8.647      | 8.515       | 8.553     |
| hsa-miR-548b-3p  | 3.96E-05   | 5.30E-05   | 8.173      | 8.381       | 8.334     |
| hsa-miR-3614-3p  | 3.97E-05   | 5.31E-05   | 8.368      | 8.476       | 8.407     |
| hsa-miR-376b-3p  | 4.10E-05   | 5.48E-05   | 8.015      | 7.865       | 8.054     |
| hsa-miR-3144-3p  | 4.11E-05   | 5.48E-05   | 8.099      | 8.229       | 8.148     |
| hsa-miR-543      | 4.18E-05   | 5.57E-05   | 14.577     | 13.165      | 14.014    |
| hsa-miR-30c-2-3p | 4.30E-05   | 5.72E-05   | 8.284      | 8.274       | 8.231     |
| hsa-miR-516a-3p  | 4.33E-05   | 5.76E-05   | 7.759      | 7.650       | 7.711     |
| hsa-miR-631      | 4.96E-05   | 6.59E-05   | 8.684      | 9.015       | 8.534     |
| hsa-miR-1224-3p  | 6.88E-05   | 9.13E-05   | 7.910      | 8.057       | 7.955     |
| hsa-miR-1244     | 6.97E-05   | 9.24E-05   | 7.942      | 7.950       | 7.996     |
| hsa-miR-518c-5p  | 7.06E-05   | 9.34E-05   | 7.720      | 7.786       | 7.739     |

| miRNA            | anova_rawp | anova_adjp | median_LCa | median_NTLD | median_OD  |
|------------------|------------|------------|------------|-------------|------------|
| hsa-miR-548d-5p  | 8.17E-05   | 0.000108   | 9.495      | 9.482       | 9.825      |
| hsa-miR-3690     | 8.72E-05   | 0.000115   | 7.603      | 7.441       | 7.626      |
| hsa-miR-873-5p   | 8.77E-05   | 0.000116   | 8.112      | 8.193       | 8.138      |
| hsa-miR-1291     | 9.12E-05   | 0.000120   | 8.915      | 8.689       | 8.782      |
| hsa-miR-221-3p   | 9.83E-05   | 0.000129   | 71.701     | 76.174      | 68.849     |
| hsa-miR-4287     | 0.000106   | 0.000139   | 7.808      | 7.879       | 7.849      |
| hsa-miR-3162-5p  | 0.000108   | 0.000142   | 189.249    | 179.977     | 155.433    |
| hsa-miR-3692-3p  | 0.000110   | 0.000144   | 7.291      | 7.220       | 7.248      |
| hsa-miR-3177-3p  | 0.000110   | 0.000144   | 7.872      | 7.865       | 7.851      |
| hsa-miR-4297     | 0.000123   | 0.000161   | 8.005      | 8.245       | 8.020      |
| hsa-miR-3613-5p  | 0.000125   | 0.000164   | 8.705      | 8.703       | 8.756      |
| hsa-miR-548a-3p  | 0.000127   | 0.000166   | 8.043      | 8.169       | 8.106      |
| hsa-miR-635      | 0.000129   | 0.000169   | 7.905      | 7.925       | 7.948      |
| hsa-miR-1228-5p  | 0.000129   | 0.000169   | 7.236      | 7.353       | 7.132      |
| hsa-miR-331-5p   | 0.000135   | 0.000176   | 7.576      | 7.492       | 7.416      |
| hsa-miR-1266-5p  | 0.000137   | 0.000179   | 7.214      | 7.185       | 7.251      |
| hsa-miR-96-3p    | 0.000152   | 0.000198   | 7.300      | 7.263       | 7.324      |
| hsa-miR-888-3p   | 0.000153   | 0.000198   | 7.774      | 7.769       | 7.826      |
| hsa-miR-548y     | 0.000159   | 0.000206   | 8.667      | 8.606       | 8.631      |
| hsa-miR-34c-5p   | 0.000175   | 0.000226   | 7.887      | 7.820       | 7.902      |
| hsa-miR-367-3p   | 0.000183   | 0.000236   | 8.345      | 8.300       | 8.337      |
| hsa-miR-23c      | 0.000183   | 0.000236   | 16.423     | 18.085      | 16.854     |
| hsa-miR-432-5p   | 0.000202   | 0.000261   | 9.695      | 9.825       | 9.753      |
| hsa-miR-548f-3p  | 0.000210   | 0.000270   | 9.315      | 8.761       | 8.987      |
| hsa-miR-3622b-3p | 0.000212   | 0.000273   | 7.746      | 7.922       | 7.822      |
| hsa-miR-567      | 0.000214   | 0.000275   | 7.726      | 7.724       | 7.804      |
| hsa-miR-541-3p   | 0.000249   | 0.000320   | 7.534      | 7.423       | 7.518      |
| hsa-miR-520e     | 0.000259   | 0.000332   | 8.510      | 8.534       | 8.602      |
| hsa-miR-764      | 0.000271   | 0.000347   | 8.490      | 8.746       | 8.538      |
| hsa-miR-570-3p   | 0.000277   | 0.000355   | 8.485      | 8.577       | 8.644      |
| hsa-miR-432-3p   | 0.000278   | 0.000356   | 8.133      | 8.309       | 8.114      |
| hsa-miR-302b-5p  | 0.000279   | 0.000356   | 8.049      | 8.027       | 8.140      |
| hsa-miR-3186-5p  | 0.000280   | 0.000357   | 7.862      | 7.969       | 7.950      |
| hsa-miR-1303     | 0.000283   | 0.000360   | 8.141      | 8.325       | 8.143      |
| hsa-miR-218-2-3p | 0.000294   | 0.000374   | 7.359      | 7.380       | 7.396      |
| hsa-miR-192-5p   | 0.000305   | 0.000389   | 1931.979   | 2381.825    | 2675.910   |
| hsa-miR-486-5p   | 0.000330   | 0.000419   | 152399.215 | 152399.215  | 152399.215 |
| hsa-miR-3689a-5p | 0.000334   | 0.000424   | 7.844      | 7.881       | 7.907      |
| hsa-miR-4316     | 0.000343   | 0.000435   | 7.265      | 7.266       | 7.263      |

| miRNA            | anova_rawp | anova_adjp | median_LCa | median_NTLD | median_OD |
|------------------|------------|------------|------------|-------------|-----------|
| hsa-miR-676-3p   | 0.000344   | 0.000435   | 7.709      | 7.666       | 7.661     |
| hsa-miR-664a-3p  | 0.000350   | 0.000442   | 198.981    | 194.084     | 209.704   |
| hsa-miR-1236-3p  | 0.000392   | 0.000495   | 8.241      | 8.325       | 8.207     |
| hsa-miR-522-3p   | 0.000428   | 0.000541   | 8.486      | 8.469       | 8.546     |
| hsa-miR-23b-5p   | 0.000444   | 0.000560   | 8.638      | 8.585       | 8.569     |
| hsa-let-7f-1-3p  | 0.000455   | 0.000573   | 17.882     | 19.387      | 17.949    |
| hsa-miR-518f-5p  | 0.000470   | 0.000591   | 7.605      | 7.733       | 7.657     |
| hsa-miR-146a-3p  | 0.000479   | 0.000602   | 8.422      | 8.334       | 8.312     |
| hsa-miR-3689a-3p | 0.000496   | 0.000622   | 7.514      | 7.619       | 7.587     |
| hsa-miR-4302     | 0.000504   | 0.000632   | 7.348      | 7.332       | 7.356     |
| hsa-miR-299-5p   | 0.000505   | 0.000633   | 13.943     | 14.382      | 14.459    |
| hsa-miR-612      | 0.000512   | 0.000640   | 7.969      | 8.032       | 7.927     |
| hsa-miR-514b-3p  | 0.000514   | 0.000643   | 7.490      | 7.569       | 7.501     |
| hsa-miR-3612     | 0.000540   | 0.000674   | 7.265      | 7.214       | 7.281     |
| hsa-miR-3942-5p  | 0.000550   | 0.000686   | 8.193      | 8.130       | 8.204     |
| hsa-miR-1323     | 0.000561   | 0.000699   | 8.600      | 8.546       | 8.623     |
| hsa-miR-548v     | 0.000565   | 0.000703   | 8.761      | 8.820       | 8.820     |
| hsa-miR-4265     | 0.000581   | 0.000722   | 7.513      | 7.555       | 7.596     |
| hsa-miR-3129-5p  | 0.000587   | 0.000730   | 7.761      | 7.813       | 7.863     |
| hsa-miR-876-5p   | 0.000592   | 0.000735   | 8.881      | 8.866       | 8.722     |
| hsa-miR-149-5p   | 0.000608   | 0.000754   | 17.687     | 19.078      | 17.816    |
| hsa-miR-1258     | 0.000621   | 0.000769   | 7.247      | 7.315       | 7.307     |
| hsa-miR-548m     | 0.000624   | 0.000772   | 8.434      | 8.557       | 8.627     |
| hsa-miR-302a-3p  | 0.000632   | 0.000782   | 8.602      | 8.680       | 8.746     |
| hsa-miR-185-5p   | 0.000645   | 0.000797   | 17426.344  | 15579.719   | 15579.719 |
| hsa-let-7b-3p    | 0.000666   | 0.000822   | 19.078     | 20.756      | 19.387    |
| hsa-miR-548n     | 0.000691   | 0.000852   | 8.673      | 8.400       | 8.644     |
| hsa-miR-323a-5p  | 0.000698   | 0.000860   | 7.064      | 7.147       | 7.059     |
| hsa-miR-548aa    | 0.000764   | 0.000939   | 10.815     | 11.441      | 12.099    |
| hsa-miR-4296     | 0.000794   | 0.000975   | 7.420      | 7.564       | 7.460     |
| hsa-miR-29a-5p   | 0.000842   | 0.001034   | 8.893      | 8.921       | 8.980     |
| hsa-miR-645      | 0.000845   | 0.001036   | 7.809      | 7.822       | 7.762     |
| hsa-miR-519b-3p  | 0.000904   | 0.001107   | 8.222      | 8.271       | 8.337     |
| hsa-miR-1267     | 0.000907   | 0.001110   | 12.145     | 12.705      | 12.193    |
| hsa-miR-4330     | 0.000960   | 0.001174   | 7.563      | 7.532       | 7.574     |
| hsa-miR-653-5p   | 0.000985   | 0.001203   | 8.176      | 8.087       | 8.087     |
| hsa-miR-493-3p   | 0.001057   | 0.001289   | 7.551      | 7.436       | 7.503     |
| hsa-miR-4288     | 0.001115   | 0.001358   | 7.990      | 8.032       | 7.974     |
| hsa-miR-204-5p   | 0.001180   | 0.001436   | 12.870     | 12.293      | 13.165    |

| miRNA             | anova_rawp | anova_adjp | median_LCa | median_NTLD | median_OD |
|-------------------|------------|------------|------------|-------------|-----------|
| hsa-miR-380-5p    | 0.001235   | 0.001501   | 7.460      | 7.475       | 7.423     |
| hsa-miR-3692-5p   | 0.001344   | 0.001632   | 7.900      | 7.713       | 7.798     |
| hsa-miR-34c-3p    | 0.001421   | 0.001724   | 7.600      | 7.650       | 7.626     |
| hsa-miR-200a-5p   | 0.001456   | 0.001765   | 7.416      | 7.361       | 7.343     |
| hsa-miR-499a-3p   | 0.001521   | 0.001841   | 7.721      | 7.682       | 7.717     |
| hsa-miR-449b-5p   | 0.001583   | 0.001915   | 7.977      | 8.008       | 8.020     |
| hsa-miR-218-1-3p  | 0.001632   | 0.001972   | 7.110      | 7.089       | 7.147     |
| hsa-miR-196a-5p   | 0.001640   | 0.001980   | 9.164      | 9.444       | 9.495     |
| hsa-miR-658       | 0.001772   | 0.002137   | 7.468      | 7.592       | 7.560     |
| hsa-miR-4321      | 0.001777   | 0.002141   | 7.966      | 7.955       | 7.955     |
| hsa-miR-125b-2-3p | 0.001785   | 0.002148   | 7.863      | 7.920       | 7.858     |
| hsa-miR-4295      | 0.001835   | 0.002206   | 8.243      | 8.177       | 8.185     |
| hsa-miR-609       | 0.001963   | 0.002358   | 8.293      | 8.538       | 8.274     |
| hsa-miR-199a-5p   | 0.002025   | 0.002430   | 215.351    | 209.704     | 204.279   |
| hsa-miR-30a-3p    | 0.002068   | 0.002479   | 8.237      | 8.494       | 8.349     |
| hsa-miR-1269a     | 0.002079   | 0.002489   | 7.204      | 7.263       | 7.220     |
| hsa-miR-582-3p    | 0.002101   | 0.002513   | 7.617      | 7.544       | 7.695     |
| hsa-miR-520a-3p   | 0.002117   | 0.002530   | 8.782      | 8.915       | 8.909     |
| hsa-miR-4263      | 0.002322   | 0.002772   | 7.427      | 7.482       | 7.401     |
| hsa-miR-592       | 0.002344   | 0.002796   | 8.009      | 7.927       | 7.946     |
| hsa-miR-206       | 0.002358   | 0.002809   | 7.385      | 7.398       | 7.383     |
| hsa-miR-4279      | 0.002368   | 0.002815   | 8.042      | 8.271       | 8.067     |
| hsa-miR-581       | 0.002368   | 0.002815   | 7.892      | 7.838       | 7.876     |
| hsa-miR-553       | 0.002383   | 0.002828   | 8.130      | 8.237       | 8.092     |
| hsa-miR-130b-5p   | 0.002384   | 0.002828   | 14.157     | 14.382      | 14.086    |
| hsa-miR-325       | 0.002451   | 0.002906   | 7.495      | 7.411       | 7.441     |
| hsa-miR-302e      | 0.002704   | 0.003202   | 7.890      | 8.023       | 7.969     |
| hsa-miR-663b      | 0.002778   | 0.003287   | 7.296      | 7.359       | 7.369     |
| hsa-miR-3169      | 0.002841   | 0.003358   | 7.080      | 7.046       | 7.101     |
| hsa-miR-4325      | 0.002952   | 0.003486   | 7.733      | 7.809       | 7.786     |
| hsa-miR-769-3p    | 0.003006   | 0.003545   | 8.909      | 9.142       | 8.890     |
| hsa-miR-504-5p    | 0.003110   | 0.003664   | 7.896      | 8.006       | 7.994     |
| hsa-miR-3620-3p   | 0.003230   | 0.003802   | 13.045     | 13.225      | 12.760    |
| hsa-miR-130a-5p   | 0.003242   | 0.003812   | 7.994      | 8.099       | 8.020     |
| hsa-miR-3181      | 0.003249   | 0.003817   | 6.876      | 6.876       | 6.821     |
| hsa-miR-182-3p    | 0.003309   | 0.003883   | 8.065      | 8.190       | 8.106     |
| hsa-miR-1185-5p   | 0.003378   | 0.003960   | 8.179      | 8.226       | 8.193     |
| hsa-miR-3691-5p   | 0.003394   | 0.003975   | 7.479      | 7.541       | 7.532     |
| hsa-miR-507       | 0.003458   | 0.004046   | 8.112      | 8.054       | 8.109     |

| miRNA           | anova_rawp | anova_adjp | median_LCa | median_NTLD | median_OD |
|-----------------|------------|------------|------------|-------------|-----------|
| hsa-miR-613     | 0.003541   | 0.004140   | 8.465      | 8.606       | 8.585     |
| hsa-miR-3935    | 0.003918   | 0.004576   | 8.521      | 8.909       | 8.501     |
| hsa-miR-520d-3p | 0.003929   | 0.004584   | 8.694      | 8.987       | 8.842     |
| hsa-miR-518d-3p | 0.003959   | 0.004614   | 8.453      | 8.631       | 8.391     |
| hsa-miR-455-3p  | 0.003993   | 0.004649   | 7.820      | 7.883       | 7.941     |
| hsa-miR-1470    | 0.004207   | 0.004894   | 11.869     | 12.545      | 11.779    |
| hsa-miR-136-3p  | 0.004297   | 0.004994   | 8.328      | 8.280       | 8.328     |
| hsa-miR-525-3p  | 0.004503   | 0.005224   | 8.173      | 8.237       | 8.283     |
| hsa-miR-767-5p  | 0.004504   | 0.005224   | 7.680      | 7.684       | 7.711     |
| hsa-miR-4306    | 0.004572   | 0.005297   | 25172.328  | 25172.328   | 25172.328 |
| hsa-miR-626     | 0.004600   | 0.005325   | 7.948      | 7.946       | 7.920     |
| hsa-miR-33a-5p  | 0.004719   | 0.005457   | 8.258      | 8.172       | 8.092     |
| hsa-miR-302d-3p | 0.004784   | 0.005527   | 8.090      | 8.231       | 8.148     |
| hsa-miR-135b-5p | 0.004791   | 0.005529   | 9.557      | 9.407       | 9.550     |
| hsa-let-7e-5p   | 0.004981   | 0.005743   | 24.654     | 25.063      | 25.615    |
| hsa-miR-3661    | 0.004992   | 0.005751   | 7.168      | 7.230       | 7.178     |
| hsa-miR-492     | 0.005089   | 0.005856   | 8.171      | 8.198       | 8.133     |
| hsa-miR-548b-5p | 0.005317   | 0.006113   | 8.428      | 8.523       | 8.530     |
| hsa-miR-875-5p  | 0.005426   | 0.006232   | 8.767      | 8.658       | 8.741     |
| hsa-miR-608     | 0.005542   | 0.006359   | 7.389      | 7.485       | 7.468     |
| hsa-miR-335-3p  | 0.005781   | 0.006627   | 12.169     | 12.651      | 12.495    |
| hsa-miR-3159    | 0.006227   | 0.007132   | 7.304      | 7.310       | 7.269     |
| hsa-miR-196b-3p | 0.006416   | 0.007341   | 7.882      | 8.084       | 7.972     |
| hsa-miR-3119    | 0.006464   | 0.007388   | 8.218      | 8.130       | 8.177     |
| hsa-miR-605-5p  | 0.006498   | 0.007420   | 8.631      | 8.712       | 8.703     |
| hsa-miR-3650    | 0.006707   | 0.007651   | 7.818      | 7.684       | 7.731     |
| hsa-miR-885-5p  | 0.006798   | 0.007747   | 11.586     | 11.735      | 11.210    |
| hsa-miR-1324    | 0.007040   | 0.008015   | 8.433      | 8.434       | 8.476     |
| hsa-miR-675-5p  | 0.007095   | 0.008070   | 6.896      | 6.968       | 6.909     |
| hsa-miR-4309    | 0.007170   | 0.008148   | 7.359      | 7.377       | 7.372     |
| hsa-miR-4307    | 0.007378   | 0.008376   | 8.717      | 8.798       | 8.803     |
| hsa-miR-302b-3p | 0.007470   | 0.008473   | 8.567      | 8.534       | 8.623     |
| hsa-miR-517c-3p | 0.007532   | 0.008535   | 8.060      | 8.150       | 8.018     |
| hsa-miR-2277-3p | 0.007585   | 0.008587   | 7.972      | 8.140       | 7.932     |
| hsa-miR-3662    | 0.007772   | 0.008790   | 7.586      | 7.530       | 7.539     |
| hsa-miR-552-3p  | 0.008066   | 0.009114   | 7.696      | 7.678       | 7.720     |
| hsa-miR-3191-3p | 0.008425   | 0.009510   | 6.774      | 6.730       | 6.763     |
| hsa-miR-600     | 0.008481   | 0.009565   | 7.374      | 7.423       | 7.372     |
| hsa-miR-1294    | 0.008584   | 0.009671   | 8.673      | 8.820       | 8.814     |

| miRNA           | anova_rawp | anova_adjp | median_LCa | median_NTLD | median_OD |
|-----------------|------------|------------|------------|-------------|-----------|
| hsa-miR-497-3p  | 0.008681   | 0.009771   | 7.298      | 7.351       | 7.359     |
| hsa-miR-149-3p  | 0.008918   | 0.010028   | 7.420      | 7.385       | 7.375     |
| hsa-miR-548u    | 0.009055   | 0.010173   | 8.623      | 8.577       | 8.658     |
| hsa-miR-136-5p  | 0.009096   | 0.010209   | 9.450      | 9.843       | 9.395     |
| hsa-miR-521     | 0.009800   | 0.010989   | 8.417      | 8.594       | 8.508     |
| hsa-miR-4273    | 0.009851   | 0.011035   | 7.348      | 7.406       | 7.337     |
| hsa-miR-143-5p  | 0.009942   | 0.011127   | 8.041      | 8.169       | 8.052     |
| hsa-miR-595     | 0.010366   | 0.011591   | 8.577      | 8.940       | 8.627     |
| hsa-miR-490-5p  | 0.010543   | 0.011778   | 7.994      | 7.890       | 7.953     |
| hsa-miR-2277-5p | 0.010604   | 0.011834   | 7.474      | 7.431       | 7.418     |
| hsa-miR-32-3p   | 0.010946   | 0.012205   | 9.594      | 9.671       | 9.284     |
| hsa-miR-302a-5p | 0.011088   | 0.012352   | 7.963      | 8.027       | 8.074     |
| hsa-miR-449a    | 0.011248   | 0.012518   | 8.450      | 8.589       | 8.627     |
| hsa-miR-596     | 0.011347   | 0.012617   | 7.493      | 7.463       | 7.455     |
| hsa-miR-671-3p  | 0.011405   | 0.012668   | 9.371      | 9.703       | 9.360     |
| hsa-miR-3158-3p | 0.011596   | 0.012868   | 7.961      | 8.027       | 7.986     |
| hsa-miR-483-3p  | 0.012121   | 0.013439   | 13.639     | 14.157      | 12.870    |
| hsa-miR-520f-3p | 0.012711   | 0.014080   | 8.722      | 8.741       | 8.751     |
| hsa-miR-302c-3p | 0.012739   | 0.014098   | 8.470      | 8.542       | 8.534     |
| hsa-miR-887-3p  | 0.012954   | 0.014322   | 8.099      | 8.040       | 8.215     |
| hsa-miR-526b-3p | 0.013159   | 0.014535   | 8.417      | 8.494       | 8.534     |
| hsa-miR-1909-5p | 0.013383   | 0.014768   | 8.046      | 8.355       | 7.989     |
| hsa-miR-3688-3p | 0.013536   | 0.014923   | 9.081      | 9.054       | 9.001     |
| hsa-miR-488-3p  | 0.013940   | 0.015355   | 8.128      | 8.196       | 8.204     |
| hsa-miR-4319    | 0.014148   | 0.015569   | 7.760      | 7.724       | 7.762     |
| hsa-miR-200b-3p | 0.015035   | 0.016530   | 8.317      | 8.589       | 8.967     |
| hsa-miR-580-3p  | 0.015232   | 0.016731   | 7.522      | 7.482       | 7.532     |
| hsa-miR-203a-3p | 0.015702   | 0.017231   | 7.782      | 7.680       | 7.746     |
| hsa-miR-3619-5p | 0.015941   | 0.017477   | 7.236      | 7.139       | 7.174     |
| hsa-miR-3126-3p | 0.017037   | 0.018662   | 7.639      | 7.709       | 7.684     |
| hsa-miR-1251-5p | 0.018008   | 0.019707   | 7.271      | 7.296       | 7.318     |
| hsa-miR-1256    | 0.018211   | 0.019911   | 8.689      | 8.777       | 8.756     |
| hsa-miR-943     | 0.018336   | 0.020029   | 7.487      | 7.534       | 7.513     |
| hsa-miR-3687    | 0.018554   | 0.020249   | 7.037      | 7.033       | 7.028     |
| hsa-miR-3657    | 0.018681   | 0.020369   | 8.338      | 8.400       | 8.397     |
| hsa-miR-554     | 0.019291   | 0.021014   | 7.427      | 7.393       | 7.413     |
| hsa-miR-573     | 0.020360   | 0.022159   | 7.307      | 7.281       | 7.281     |
| hsa-miR-422a    | 0.020514   | 0.022305   | 7.257      | 7.214       | 7.298     |
| hsa-miR-95-3p   | 0.021020   | 0.022834   | 8.244      | 8.319       | 8.292     |

| miRNA            | anova_rawp | anova_adjp | median_LCa | median_NTLD | median_OD |
|------------------|------------|------------|------------|-------------|-----------|
| hsa-miR-302f     | 0.021116   | 0.022918   | 7.995      | 8.011       | 8.027     |
| hsa-miR-25-5p    | 0.021243   | 0.023034   | 7.804      | 7.791       | 7.833     |
| hsa-miR-544a     | 0.021697   | 0.023505   | 8.777      | 8.627       | 8.708     |
| hsa-miR-122-5p   | 0.022851   | 0.024733   | 9.425      | 9.395       | 9.671     |
| hsa-miR-3664-5p  | 0.023034   | 0.024908   | 7.680      | 7.687       | 7.601     |
| hsa-miR-3649     | 0.023826   | 0.025740   | 7.157      | 7.224       | 7.233     |
| hsa-miR-3171     | 0.023908   | 0.025806   | 8.823      | 8.684       | 8.751     |
| hsa-miR-224-3p   | 0.023957   | 0.025835   | 7.874      | 7.939       | 7.890     |
| hsa-miR-148a-5p  | 0.026645   | 0.028708   | 8.005      | 8.079       | 8.018     |
| hsa-miR-1296-5p  | 0.026833   | 0.028884   | 8.675      | 8.902       | 8.658     |
| hsa-miR-3680-5p  | 0.028299   | 0.030434   | 7.857      | 7.863       | 7.881     |
| hsa-miR-640      | 0.029314   | 0.031497   | 8.272      | 8.381       | 8.220     |
| hsa-miR-3939     | 0.029979   | 0.032182   | 7.812      | 7.760       | 7.815     |
| hsa-miR-3178     | 0.030384   | 0.032588   | 6.934      | 6.962       | 6.940     |
| hsa-miR-33b-5p   | 0.031550   | 0.033808   | 8.020      | 8.023       | 7.943     |
| hsa-miR-218-5p   | 0.031874   | 0.034124   | 8.443      | 8.504       | 8.594     |
| hsa-miR-3165     | 0.033080   | 0.035383   | 7.766      | 7.760       | 7.813     |
| hsa-miR-632      | 0.033424   | 0.035718   | 7.965      | 7.922       | 7.925     |
| hsa-miR-589-5p   | 0.035975   | 0.038410   | 7.731      | 7.782       | 7.744     |
| hsa-miR-1178-3p  | 0.037066   | 0.039540   | 8.368      | 8.424       | 8.349     |
| hsa-miR-551a     | 0.037287   | 0.039739   | 8.243      | 8.300       | 8.283     |
| hsa-miR-616-5p   | 0.037499   | 0.039929   | 7.861      | 7.858       | 7.815     |
| hsa-miR-425-5p   | 0.037694   | 0.040101   | 21787.992  | 19451.763   | 19451.763 |
| hsa-miR-2909     | 0.038987   | 0.041439   | 8.136      | 8.092       | 8.101     |
| hsa-miR-2113     | 0.043236   | 0.045914   | 7.874      | 7.984       | 7.911     |
| hsa-miR-3912-3p  | 0.044692   | 0.047418   | 8.138      | 8.069       | 8.052     |
| hsa-miR-548i     | 0.047368   | 0.050203   | 7.735      | 7.798       | 7.777     |
| hsa-miR-3170     | 0.047402   | 0.050203   | 7.492      | 7.433       | 7.401     |
| hsa-miR-195-3p   | 0.048024   | 0.050816   | 8.134      | 8.337       | 8.130     |
| hsa-miR-124-3p   | 0.049666   | 0.052507   | 7.448      | 7.453       | 7.472     |
| hsa-miR-26a-2-3p | 0.053150   | 0.056140   | 9.550      | 9.304       | 9.371     |
| hsa-miR-373-3p   | 0.054787   | 0.057817   | 8.147      | 8.201       | 8.150     |
| hsa-miR-4329     | 0.055718   | 0.058747   | 7.815      | 7.907       | 7.863     |
| hsa-miR-2355-3p  | 0.056144   | 0.059143   | 8.229      | 8.245       | 8.265     |
| hsa-miR-520c-3p  | 0.057207   | 0.060210   | 8.308      | 8.458       | 8.407     |
| hsa-miR-519d-3p  | 0.059960   | 0.063051   | 8.698      | 8.890       | 8.731     |
| hsa-let-7f-2-3p  | 0.060430   | 0.063489   | 9.348      | 9.224       | 9.205     |
| hsa-miR-4312     | 0.061998   | 0.065078   | 13.805     | 15.281      | 13.805    |
| hsa-miR-33a-3p   | 0.066904   | 0.070166   | 8.056      | 8.077       | 8.119     |



| miRNA           | anova_rawp | anova_adjp | median_LCa | median_NTLD | median_OD |
|-----------------|------------|------------|------------|-------------|-----------|
| hsa-miR-27b-5p  | 0.067191   | 0.070405   | 7.369      | 7.356       | 7.356     |
| hsa-miR-3646    | 0.070689   | 0.074005   | 12.760     | 13.805      | 12.929    |
| hsa-miR-1179    | 0.073030   | 0.076388   | 8.404      | 8.410       | 8.404     |
| hsa-miR-618     | 0.087553   | 0.091498   | 8.237      | 8.161       | 8.209     |
| hsa-miR-2114-5p | 0.089639   | 0.093595   | 7.432      | 7.423       | 7.472     |
| hsa-miR-657     | 0.094767   | 0.098842   | 8.335      | 8.325       | 8.325     |
| hsa-miR-523-3p  | 0.094832   | 0.098842   | 7.408      | 7.446       | 7.423     |
| hsa-miR-3143    | 0.098358   | 0.102427   | 7.623      | 7.605       | 7.576     |
| hsa-miR-3913-5p | 0.109486   | 0.113916   | 7.993      | 7.986       | 8.013     |
| hsa-miR-205-3p  | 0.111185   | 0.115582   | 7.337      | 7.332       | 7.321     |
| hsa-miR-603     | 0.114027   | 0.118431   | 8.149      | 8.164       | 8.114     |
| hsa-miR-619-3p  | 0.115492   | 0.119848   | 7.540      | 7.523       | 7.494     |
| hsa-miR-330-5p  | 0.116982   | 0.121288   | 8.048      | 8.040       | 8.004     |
| hsa-miR-4268    | 0.117658   | 0.121882   | 7.553      | 7.599       | 7.583     |
| hsa-miR-519c-3p | 0.125673   | 0.130069   | 8.506      | 8.421       | 8.469     |
| hsa-miR-578     | 0.125781   | 0.130069   | 7.692      | 7.678       | 7.628     |
| hsa-miR-100-5p  | 0.128504   | 0.132769   | 243.708    | 254.386     | 294.429   |
| hsa-miR-548a-5p | 0.153223   | 0.158170   | 8.662      | 8.557       | 8.594     |
| hsa-miR-3938    | 0.176796   | 0.182345   | 7.922      | 8.035       | 7.977     |
| hsa-miR-520g-3p | 0.180941   | 0.186458   | 8.553      | 8.644       | 8.602     |
| hsa-miR-3922-3p | 0.184660   | 0.190125   | 8.501      | 8.615       | 8.557     |
| hsa-miR-1253    | 0.194901   | 0.200494   | 7.383      | 7.433       | 7.428     |
| hsa-miR-4294    | 0.203849   | 0.209516   | 7.773      | 7.815       | 7.863     |
| hsa-miR-520b    | 0.209408   | 0.215043   | 8.268      | 8.448       | 8.319     |
| hsa-miR-649     | 0.217193   | 0.222844   | 7.396      | 7.364       | 7.393     |
| hsa-miR-1257    | 0.231903   | 0.237730   | 7.583      | 7.599       | 7.574     |
| hsa-miR-648     | 0.233331   | 0.238987   | 7.196      | 7.080       | 7.201     |
| hsa-miR-562     | 0.235183   | 0.240676   | 8.008      | 7.953       | 7.960     |
| hsa-miR-3921    | 0.278172   | 0.284423   | 8.138      | 8.087       | 8.130     |
| hsa-miR-676-5p  | 0.285482   | 0.291645   | 7.654      | 7.689       | 7.700     |
| hsa-miR-1538    | 0.318069   | 0.324655   | 8.247      | 8.355       | 8.254     |
| hsa-miR-1243    | 0.329869   | 0.336410   | 7.825      | 7.822       | 7.793     |
| hsa-miR-924     | 0.402919   | 0.410554   | 8.288      | 8.300       | 8.243     |
| hsa-miR-4320    | 0.435747   | 0.443622   | 8.038      | 8.104       | 8.040     |
| hsa-miR-3714    | 0.449185   | 0.456910   | 8.331      | 8.445       | 8.388     |
| hsa-miR-16-1-3p | 0.449987   | 0.457332   | 8.438      | 8.352       | 8.312     |
| hsa-miR-651-5p  | 0.454314   | 0.461333   | 7.801      | 7.835       | 7.811     |
| hsa-miR-3145-3p | 0.471859   | 0.478739   | 7.749      | 7.709       | 7.742     |
| hsa-miR-621     | 0.473591   | 0.480084   | 7.428      | 7.477       | 7.431     |

| miRNA            | anova_rawp | anova_adjp | median_LCa | median_NTLD | median_OD |
|------------------|------------|------------|------------|-------------|-----------|
| hsa-miR-3689b-3p | 0.476559   | 0.482679   | 7.575      | 7.571       | 7.612     |
| hsa-miR-1306-3p  | 0.492337   | 0.498112   | 8.947      | 9.196       | 8.671     |
| hsa-miR-3622a-3p | 0.492638   | 0.498112   | 9.191      | 9.205       | 9.077     |
| hsa-miR-3670     | 0.568427   | 0.574252   | 8.421      | 8.486       | 8.469     |
| hsa-miR-371a-3p  | 0.578076   | 0.583502   | 8.623      | 8.636       | 8.581     |
| hsa-miR-1264     | 0.614251   | 0.619487   | 8.596      | 8.577       | 8.606     |
| hsa-miR-147a     | 0.615767   | 0.620487   | 7.721      | 7.755       | 7.715     |
| hsa-miR-670-5p   | 0.633029   | 0.637339   | 8.175      | 8.201       | 8.188     |
| hsa-miR-429      | 0.643989   | 0.647822   | 7.838      | 7.902       | 7.913     |
| hsa-miR-200a-3p  | 0.650705   | 0.654022   | 7.616      | 7.791       | 7.746     |
| hsa-miR-3675-5p  | 0.662823   | 0.665636   | 7.777      | 7.773       | 7.773     |
| hsa-miR-3674     | 0.684980   | 0.687304   | 7.493      | 7.520       | 7.518     |
| hsa-miR-518c-3p  | 0.813560   | 0.815628   | 8.402      | 8.424       | 8.394     |
| hsa-miR-506-3p   | 0.815454   | 0.816835   | 8.092      | 8.101       | 8.092     |
| hsa-miR-194-3p   | 0.878885   | 0.879629   | 8.101      | 8.101       | 8.057     |
| hsa-miR-489-3p   | 0.974914   | 0.974914   | 8.340      | 8.334       | 8.349     |

| miRNA           | median_Con | mean_LCa | mean_NTLD | mean_OD  | mean_Con |
|-----------------|------------|----------|-----------|----------|----------|
| hsa-miR-17-3p   | 37.514     | 51.205   | 161.360   | 37.205   | 42.428   |
| hsa-miR-21-3p   | 12.053     | 15.720   | 36.321    | 14.397   | 13.625   |
| hsa-miR-193a-3p | 10.025     | 10.496   | 13.997    | 10.392   | 10.105   |
| hsa-miR-18b-5p  | 45.106     | 35.461   | 98.207    | 41.933   | 53.104   |
| hsa-miR-18a-5p  | 80.927     | 65.211   | 202.944   | 82.151   | 102.190  |
| hsa-miR-338-3p  | 29.470     | 47.185   | 84.241    | 39.832   | 32.934   |
| hsa-miR-4286    | 189.249    | 852.199  | 785.366   | 270.177  | 277.548  |
| hsa-miR-144-3p  | 261.772    | 804.918  | 2551.585  | 481.590  | 545.471  |
| hsa-miR-301a-3p | 24.140     | 27.636   | 67.279    | 29.482   | 32.435   |
| hsa-miR-374c-5p | 44.398     | 28.377   | 37.425    | 67.370   | 52.366   |
| hsa-miR-374b-5p | 593.612    | 358.296  | 447.881   | 817.380  | 645.217  |
| hsa-miR-15a-5p  | 5192.812   | 3585.736 | 6369.604  | 5455.596 | 5623.649 |
| hsa-miR-142-3p  | 1667.739   | 2925.877 | 5766.023  | 2560.538 | 2197.710 |
| hsa-miR-106b-5p | 5192.812   | 3806.365 | 7506.213  | 4993.843 | 5539.855 |
| hsa-miR-188-3p  | 7.783      | 7.951    | 8.935     | 7.944    | 7.888    |
| hsa-miR-590-5p  | 41.034     | 32.427   | 83.930    | 42.542   | 53.295   |
| hsa-miR-660-5p  | 312.739    | 187.989  | 363.279   | 281.265  | 306.219  |

| <b>miRNA</b>    | <b>median_Con</b> | <b>mean_LCa</b> | <b>mean_NTL</b> | <b>mean_OD</b> | <b>mean_Con</b> |
|-----------------|-------------------|-----------------|-----------------|----------------|-----------------|
| hsa-miR-101-3p  | 204.279           | 180.916         | 449.209         | 240.941        | 264.954         |
| hsa-miR-126-3p  | 1026.768          | 757.303         | 1109.723        | 1134.266       | 1156.600        |
| hsa-miR-30d-5p  | 1836.074          | 4140.821        | 3701.274        | 2147.169       | 2221.353        |
| hsa-miR-29b-3p  | 141.839           | 146.443         | 275.376         | 166.053        | 154.100         |
| hsa-miR-101-5p  | 11.323            | 10.422          | 17.607          | 12.248         | 13.374          |
| hsa-miR-19a-3p  | 901.800           | 798.237         | 1853.308        | 1043.766       | 1006.129        |
| hsa-miR-500a-3p | 171.344           | 232.427         | 251.130         | 164.468        | 180.603         |
| hsa-miR-27a-3p  | 169.204           | 197.012         | 348.008         | 230.684        | 186.327         |
| hsa-miR-770-5p  | 8.185             | 8.386           | 9.128           | 8.031          | 8.241           |
| hsa-miR-15a-3p  | 13.477            | 12.764          | 16.979          | 13.494         | 13.854          |
| hsa-miR-16-5p   | 51566.010         | 42276.622       | 58630.377       | 58524.074      | 58263.463       |
| hsa-let-7g-3p   | 8.032             | 7.972           | 8.692           | 7.933          | 8.158           |
| hsa-miR-144-5p  | 406.818           | 529.942         | 1010.577        | 965.981        | 669.408         |
| hsa-miR-140-5p  | 89.553            | 65.781          | 119.384         | 99.589         | 99.216          |
| hsa-miR-1260a   | 277.393           | 985.482         | 691.772         | 334.408        | 385.008         |
| hsa-miR-378b    | 9.360             | 13.687          | 10.688          | 9.854          | 10.090          |
| hsa-miR-320d    | 3215.214          | 6064.949        | 2700.547        | 3702.133       | 3836.530        |
| hsa-miR-20a-5p  | 1750.457          | 1709.246        | 3133.665        | 2011.557       | 2575.589        |
| hsa-miR-363-3p  | 5923.637          | 4870.134        | 6759.135        | 7600.345       | 5786.149        |
| hsa-miR-625-5p  | 303.243           | 489.790         | 235.586         | 377.782        | 330.580         |
| hsa-miR-17-5p   | 2139.988          | 1767.121        | 2689.674        | 2381.560       | 2494.040        |
| hsa-miR-320e    | 2252.992          | 4136.188        | 1915.976        | 2620.725       | 2629.387        |
| hsa-miR-3607-3p | 9.608             | 9.151           | 8.834           | 10.816         | 10.486          |
| hsa-miR-107     | 9512.633          | 8695.635        | 12784.053       | 9000.923       | 9886.000        |
| hsa-miR-320c    | 1454.212          | 2686.589        | 1138.691        | 1762.156       | 1744.456        |
| hsa-miR-374a-5p | 215.351           | 154.528         | 272.805         | 362.662        | 300.371         |
| hsa-miR-30a-5p  | 52.624            | 218.212         | 98.883          | 55.678         | 61.775          |
| hsa-miR-96-5p   | 380.311           | 322.008         | 545.374         | 455.013        | 434.691         |
| hsa-miR-20b-5p  | 1070.925          | 943.783         | 1480.796        | 1205.657       | 1332.581        |
| hsa-miR-29c-3p  | 670.919           | 804.711         | 1350.257        | 896.601        | 731.523         |
| hsa-miR-340-5p  | 49.049            | 52.751          | 96.788          | 57.597         | 50.937          |
| hsa-miR-1260b   | 113.066           | 389.896         | 239.844         | 126.925        | 149.610         |
| hsa-miR-126-5p  | 18.152            | 15.150          | 22.852          | 25.445         | 21.647          |
| hsa-miR-3152-3p | 7.418             | 16.081          | 8.348           | 7.726          | 7.551           |
| hsa-miR-30e-5p  | 506.227           | 493.113         | 746.903         | 486.747        | 517.436         |
| hsa-miR-193a-5p | 14.537            | 18.994          | 13.368          | 16.119         | 15.163          |
| hsa-miR-145-5p  | 144.963           | 292.581         | 170.328         | 187.399        | 168.410         |
| hsa-miR-575     | 40.416            | 71.600          | 40.769          | 48.414         | 45.119          |

| <b>miRNA</b>    | <b>median_Con</b> | <b>mean_LCa</b> | <b>mean_NTL</b> | <b>mean_OD</b> | <b>mean_Con</b> |
|-----------------|-------------------|-----------------|-----------------|----------------|-----------------|
| hsa-miR-320b    | 3017.032          | 5405.966        | 2481.369        | 3685.069       | 3849.771        |
| hsa-miR-103a-3p | 9512.633          | 7705.691        | 10501.416       | 9001.446       | 9300.014        |
| hsa-miR-423-5p  | 1520.100          | 2405.589        | 1287.830        | 1757.476       | 1894.385        |
| hsa-miR-502-3p  | 215.351           | 303.412         | 307.355         | 219.042        | 233.029         |
| hsa-miR-21-5p   | 2030.986          | 1694.204        | 1971.257        | 2399.773       | 2365.028        |
| hsa-miR-769-5p  | 22.376            | 28.488          | 31.432          | 24.242         | 23.129          |
| hsa-miR-3190-5p | 12.495            | 15.221          | 16.294          | 15.745         | 12.749          |
| hsa-miR-191-5p  | 42.334            | 45.743          | 34.977          | 42.678         | 57.456          |
| hsa-miR-324-3p  | 3662.829          | 5152.626        | 3118.004        | 3725.641       | 4122.430        |
| hsa-miR-93-3p   | 89.553            | 88.713          | 84.792          | 100.448        | 145.383         |
| hsa-miR-3651    | 167.063           | 203.775         | 142.374         | 213.568        | 198.327         |
| hsa-miR-4281    | 312.738           | 2421.128        | 346.250         | 516.446        | 461.892         |
| hsa-miR-4284    | 699.243           | 1036.466        | 651.997         | 878.871        | 988.483         |
| hsa-miR-1290    | 11.134            | 17.423          | 14.679          | 13.159         | 12.339          |
| hsa-miR-130a-3p | 1166.320          | 868.642         | 1178.362        | 1058.496       | 1207.343        |
| hsa-miR-195-5p  | 77.745            | 61.691          | 71.409          | 97.809         | 114.385         |
| hsa-let-7i-3p   | 8.912             | 8.501           | 9.252           | 8.867          | 9.009           |
| hsa-miR-505-3p  | 97.276            | 178.464         | 115.840         | 129.766        | 108.483         |
| hsa-miR-381-3p  | 9.034             | 9.531           | 10.907          | 9.229          | 9.616           |
| hsa-miR-320a    | 2030.986          | 3369.099        | 1789.979        | 2207.951       | 2453.178        |
| hsa-miR-3914    | 7.236             | 7.466           | 7.132           | 7.394          | 7.270           |
| hsa-miR-4282    | 8.218             | 8.468           | 7.989           | 8.357          | 8.301           |
| hsa-miR-1285-3p | 37.514            | 50.840          | 33.103          | 38.486         | 40.046          |
| hsa-miR-139-3p  | 17.199            | 17.541          | 14.839          | 17.510         | 19.362          |
| hsa-miR-148a-3p | 307.991           | 255.981         | 417.621         | 432.143        | 342.944         |
| hsa-miR-324-5p  | 414.217           | 636.567         | 524.926         | 424.923        | 463.210         |
| hsa-miR-502-5p  | 48.215            | 39.849          | 62.378          | 50.471         | 48.957          |
| hsa-miR-940     | 55.551            | 195.889         | 71.376          | 92.551         | 81.240          |
| hsa-miR-3074-3p | 8.540             | 8.371           | 9.743           | 8.739          | 8.779           |
| hsa-miR-32-5p   | 8.012             | 8.238           | 9.427           | 8.126          | 8.165           |
| hsa-miR-26b-5p  | 2030.986          | 1944.037        | 2328.382        | 3470.017       | 2694.186        |
| hsa-miR-23a-5p  | 7.884             | 8.842           | 8.476           | 8.063          | 7.993           |
| hsa-miR-629-3p  | 30.981            | 40.611          | 29.067          | 31.399         | 34.099          |
| hsa-miR-2110    | 18.640            | 21.848          | 14.761          | 18.490         | 20.037          |
| hsa-miR-624-5p  | 25.063            | 23.623          | 37.606          | 35.182         | 28.890          |
| hsa-miR-1249-3p | 26.187            | 88.147          | 24.616          | 35.786         | 32.534          |
| hsa-miR-665     | 16.214            | 22.403          | 17.151          | 17.956         | 16.873          |
| hsa-miR-3138    | 10.654            | 28.528          | 12.532          | 12.587         | 11.715          |

| <b>miRNA</b>      | <b>median_Con</b> | <b>mean_LCa</b> | <b>mean_NTL</b> | <b>mean_OD</b> | <b>mean_Con</b> |
|-------------------|-------------------|-----------------|-----------------|----------------|-----------------|
| hsa-miR-3141      | 16.854            | 99.708          | 22.593          | 22.323         | 20.972          |
| hsa-miR-491-3p    | 9.142             | 9.622           | 11.524          | 9.837          | 9.545           |
| hsa-miR-628-3p    | 20.942            | 16.429          | 15.866          | 19.653         | 19.924          |
| hsa-miR-196b-5p   | 27.412            | 23.748          | 30.489          | 30.699         | 30.912          |
| hsa-miR-181a-5p   | 593.612           | 873.842         | 535.469         | 590.638        | 648.322         |
| hsa-miR-532-5p    | 406.818           | 318.291         | 310.048         | 389.123        | 398.005         |
| hsa-miR-559       | 8.233             | 8.186           | 8.133           | 8.642          | 8.381           |
| hsa-miR-182-5p    | 312.738           | 271.614         | 254.944         | 431.468        | 376.253         |
| hsa-miR-197-3p    | 247.251           | 551.446         | 288.389         | 407.774        | 397.645         |
| hsa-miR-874-3p    | 36.977            | 55.529          | 36.803          | 41.793         | 46.505          |
| hsa-miR-3127-5p   | 18.489            | 27.411          | 22.081          | 18.900         | 20.372          |
| hsa-miR-424-5p    | 43.689            | 45.223          | 76.471          | 66.510         | 57.446          |
| hsa-miR-212-3p    | 19.714            | 21.212          | 33.312          | 18.563         | 21.215          |
| hsa-miR-503-5p    | 8.405             | 8.792           | 9.354           | 8.383          | 8.646           |
| hsa-miR-129-2-3p  | 20.756            | 24.509          | 19.427          | 24.554         | 22.522          |
| hsa-miR-128-3p    | 901.800           | 1063.669        | 719.296         | 1107.158       | 972.624         |
| hsa-miR-151a-3p   | 699.243           | 1164.535        | 631.792         | 883.443        | 777.423         |
| hsa-miR-2115-5p   | 9.077             | 10.249          | 10.725          | 9.641          | 9.249           |
| hsa-miR-219a-1-3p | 6.846             | 6.881           | 7.062           | 6.842          | 6.859           |
| hsa-let-7i-5p     | 10181.488         | 8853.775        | 10934.233       | 10251.926      | 11362.285       |
| hsa-miR-888-5p    | 7.837             | 7.927           | 7.665           | 7.932          | 7.871           |
| hsa-miR-505-5p    | 261.772           | 339.606         | 203.069         | 296.398        | 288.649         |
| hsa-miR-452-3p    | 6.909             | 7.115           | 6.847           | 7.059          | 6.950           |
| hsa-miR-337-5p    | 7.955             | 7.978           | 8.398           | 7.958          | 8.055           |
| hsa-miR-584-5p    | 175.608           | 262.853         | 164.848         | 195.208        | 191.569         |
| hsa-miR-1180-3p   | 12.985            | 13.558          | 11.172          | 13.687         | 14.157          |
| hsa-miR-373-5p    | 8.100             | 8.591           | 8.354           | 8.020          | 8.173           |
| hsa-miR-181b-5p   | 34.940            | 50.894          | 34.656          | 40.981         | 38.870          |
| hsa-miR-3686      | 7.204             | 7.317           | 7.070           | 7.297          | 7.214           |
| hsa-miR-15b-3p    | 29.109            | 29.448          | 30.071          | 42.311         | 44.458          |
| hsa-miR-16-2-3p   | 26.778            | 31.148          | 31.925          | 71.390         | 110.291         |
| hsa-miR-454-3p    | 108.318           | 96.738          | 126.663         | 139.729        | 148.327         |
| hsa-miR-513a-3p   | 7.891             | 7.777           | 7.623           | 7.859          | 7.915           |
| hsa-miR-4289      | 7.876             | 7.687           | 7.968           | 7.932          | 7.919           |
| hsa-miR-450a-5p   | 9.728             | 9.796           | 10.639          | 11.757         | 10.572          |
| hsa-miR-620       | 7.352             | 7.612           | 7.325           | 7.561          | 7.405           |
| hsa-miR-150-3p    | 10.815            | 67.053          | 13.693          | 12.070         | 11.585          |
| hsa-miR-29c-5p    | 322.938           | 614.429         | 527.981         | 401.115        | 352.107         |

| miRNA             | median_Con | mean_LCa  | mean_NTL  | mean_OD   | mean_Con  |
|-------------------|------------|-----------|-----------|-----------|-----------|
| hsa-miR-921       | 7.525      | 7.946     | 7.529     | 7.591     | 7.589     |
| hsa-miR-598-3p    | 14.121     | 12.496    | 15.861    | 15.002    | 14.823    |
| hsa-miR-129-1-3p  | 15.870     | 18.567    | 15.133    | 19.286    | 17.624    |
| hsa-miR-23b-3p    | 643.662    | 888.906   | 569.585   | 829.025   | 698.681   |
| hsa-miR-300       | 7.711      | 7.721     | 7.994     | 7.714     | 7.720     |
| hsa-miR-190a-5p   | 9.489      | 9.768     | 12.507    | 10.451    | 10.452    |
| hsa-let-7d-5p     | 5923.637   | 5954.443  | 5029.457  | 6511.171  | 6341.058  |
| hsa-miR-548e-3p   | 10.312     | 9.870     | 10.665    | 11.481    | 10.806    |
| hsa-miR-518a-5p   | 7.614      | 7.887     | 7.919     | 7.674     | 7.653     |
| hsa-miR-7-5p      | 247.251    | 169.899   | 225.477   | 240.378   | 268.962   |
| hsa-miR-15b-5p    | 78654.362  | 70092.745 | 85059.883 | 79990.727 | 75984.680 |
| hsa-miR-3200-5p   | 119.392    | 109.546   | 83.211    | 120.882   | 127.768   |
| hsa-miR-3121-3p   | 7.621      | 9.216     | 7.759     | 7.874     | 7.861     |
| hsa-miR-23a-3p    | 5192.812   | 7248.192  | 4935.806  | 7295.641  | 5621.278  |
| hsa-miR-22-3p     | 9512.633   | 13033.350 | 10830.239 | 10833.045 | 9851.332  |
| hsa-miR-4328      | 8.164      | 8.518     | 8.488     | 8.345     | 8.212     |
| hsa-miR-219a-5p   | 9.294      | 9.594     | 10.276    | 9.542     | 9.413     |
| hsa-miR-26a-5p    | 3426.571   | 3269.967  | 3974.753  | 4535.198  | 3697.640  |
| hsa-miR-125b-1-3p | 8.696      | 8.729     | 8.178     | 8.814     | 9.208     |
| hsa-miR-3157-5p   | 8.754      | 9.055     | 9.594     | 8.953     | 8.850     |
| hsa-miR-362-3p    | 43.689     | 40.632    | 67.672    | 57.247    | 48.623    |
| hsa-miR-92a-1-5p  | 7.610      | 7.775     | 7.895     | 7.687     | 7.629     |
| hsa-let-7g-5p     | 5923.637   | 6284.502  | 7830.922  | 6996.570  | 7065.229  |
| hsa-miR-3907      | 20.217     | 19.335    | 31.947    | 23.071    | 32.178    |
| hsa-miR-3134      | 7.979      | 8.259     | 7.927     | 8.179     | 8.060     |
| hsa-miR-4291      | 34.457     | 29.697    | 35.398    | 40.766    | 35.592    |
| hsa-miR-497-5p    | 9.962      | 10.032    | 11.702    | 10.499    | 10.428    |
| hsa-miR-610       | 12.317     | 11.576    | 11.053    | 12.113    | 12.570    |
| hsa-miR-99b-5p    | 57.679     | 92.234    | 60.705    | 64.315    | 61.889    |
| hsa-miR-26a-1-3p  | 10.184     | 10.197    | 12.057    | 11.065    | 10.628    |
| hsa-miR-501-5p    | 108.318    | 155.416   | 114.426   | 135.321   | 115.174   |
| hsa-miR-628-5p    | 11.648     | 11.783    | 12.679    | 14.455    | 12.680    |
| hsa-miR-3679-5p   | 38.073     | 166.544   | 56.594    | 56.435    | 49.557    |
| hsa-miR-1537-3p   | 8.164      | 8.089     | 8.409     | 8.142     | 8.182     |
| hsa-miR-155-5p    | 91.402     | 95.554    | 75.938    | 102.571   | 93.906    |
| hsa-miR-330-3p    | 21.734     | 26.864    | 19.751    | 21.887    | 21.444    |
| hsa-miR-1252-5p   | 7.720      | 8.076     | 7.786     | 7.885     | 7.759     |
| hsa-miR-93-5p     | 2139.988   | 2195.047  | 2808.148  | 2306.784  | 2770.903  |

| <b>miRNA</b>    | <b>median_Con</b> | <b>mean_LCa</b> | <b>mean_NTL</b> | <b>mean_OD</b> | <b>mean_Con</b> |
|-----------------|-------------------|-----------------|-----------------|----------------|-----------------|
| hsa-miR-106b-3p | 8.057             | 7.964           | 7.966           | 8.024          | 8.809           |
| hsa-miR-3195    | 50.779            | 320.732         | 70.458          | 74.991         | 59.602          |
| hsa-miR-582-5p  | 10.883            | 12.958          | 15.610          | 13.572         | 12.185          |
| hsa-miR-2861    | 194.084           | 376.741         | 198.370         | 394.763        | 350.673         |
| hsa-miR-222-3p  | 135.366           | 116.436         | 128.136         | 139.623        | 157.769         |
| hsa-miR-151a-5p | 5192.812          | 5931.104        | 4464.780        | 5763.334       | 5499.275        |
| hsa-miR-3198    | 74.636            | 139.016         | 100.116         | 93.927         | 92.038          |
| hsa-miR-4298    | 14.459            | 128.889         | 20.046          | 20.015         | 18.868          |
| hsa-miR-29a-3p  | 730.608           | 931.698         | 1037.345        | 883.552        | 775.396         |
| hsa-miR-3618    | 7.811             | 7.874           | 7.665           | 7.917          | 7.834           |
| hsa-miR-633     | 8.431             | 8.600           | 8.224           | 8.753          | 8.623           |
| hsa-miR-205-5p  | 7.791             | 8.535           | 7.778           | 7.843          | 7.832           |
| hsa-miR-1914-3p | 99.341            | 147.581         | 93.253          | 125.380        | 114.826         |
| hsa-miR-1973    | 18.781            | 40.754          | 23.879          | 28.088         | 21.988          |
| hsa-miR-3156-5p | 19.879            | 29.039          | 23.611          | 23.882         | 21.488          |
| hsa-miR-545-5p  | 7.882             | 8.178           | 7.842           | 8.030          | 7.931           |
| hsa-let-7f-5p   | 8877.773          | 9247.670        | 8820.241        | 10415.571      | 10692.337       |
| hsa-miR-3668    | 7.575             | 7.766           | 7.473           | 7.709          | 7.620           |
| hsa-miR-3124-5p | 8.198             | 9.292           | 8.552           | 8.456          | 8.255           |
| hsa-miR-3663-3p | 11.735            | 787.048         | 18.056          | 16.808         | 12.973          |
| hsa-miR-483-5p  | 11.670            | 42.600          | 20.201          | 17.373         | 14.586          |
| hsa-miR-556-5p  | 7.888             | 8.059           | 7.720           | 7.936          | 7.917           |
| hsa-miR-181c-5p | 20.392            | 21.923          | 24.657          | 18.971         | 22.105          |
| hsa-miR-548q    | 10.406            | 10.112          | 9.665           | 10.340         | 10.921          |
| hsa-miR-152-3p  | 14.939            | 12.174          | 12.910          | 14.902         | 14.344          |
| hsa-miR-155-3p  | 8.751             | 8.851           | 8.501           | 8.988          | 8.891           |
| hsa-miR-342-5p  | 227.320           | 301.302         | 197.868         | 231.110        | 249.754         |
| hsa-miR-125a-5p | 171.344           | 278.148         | 183.111         | 212.383        | 196.846         |
| hsa-miR-514b-5p | 8.283             | 14.963          | 9.458           | 8.734          | 8.503           |
| hsa-miR-181d-5p | 12.193            | 13.844          | 11.752          | 17.668         | 13.914          |
| hsa-miR-1915-3p | 108.318           | 577.376         | 106.755         | 229.141        | 210.620         |
| hsa-miR-2052    | 7.614             | 7.712           | 7.419           | 7.701          | 7.628           |
| hsa-miR-27b-3p  | 66.151            | 83.274          | 90.247          | 103.764        | 81.699          |
| hsa-miR-4314    | 7.658             | 8.522           | 8.201           | 7.905          | 7.810           |
| hsa-miR-513a-5p | 20.392            | 47.547          | 52.266          | 31.336         | 26.979          |
| hsa-miR-652-3p  | 1331.192          | 1446.002        | 1147.661        | 1367.136       | 1491.136        |
| hsa-miR-3128    | 8.268             | 8.265           | 8.141           | 8.483          | 8.326           |
| hsa-miR-1226-5p | 8.362             | 9.702           | 8.736           | 8.525          | 8.506           |

| <b>miRNA</b>      | <b>median_Con</b> | <b>mean_LCa</b> | <b>mean_NTL</b> | <b>mean_OD</b> | <b>mean_Con</b> |
|-------------------|-------------------|-----------------|-----------------|----------------|-----------------|
| hsa-miR-495-3p    | 18.489            | 17.729          | 19.914          | 25.631         | 24.140          |
| hsa-miR-145-3p    | 9.205             | 9.458           | 9.334           | 9.996          | 9.543           |
| hsa-miR-142-5p    | 240.165           | 235.089         | 344.487         | 277.576        | 264.716         |
| hsa-miR-139-5p    | 14.382            | 17.693          | 13.777          | 15.382         | 15.651          |
| hsa-miR-3611      | 7.668             | 8.085           | 7.845           | 7.772          | 7.745           |
| hsa-miR-24-3p     | 1454.212          | 1673.457        | 1596.727        | 1887.080       | 1540.869        |
| hsa-miR-3653-3p   | 247.251           | 368.093         | 211.473         | 350.354        | 313.404         |
| hsa-miR-876-3p    | 8.030             | 8.296           | 8.134           | 8.470          | 8.140           |
| hsa-miR-1248      | 7.530             | 7.720           | 7.487           | 7.550          | 7.544           |
| hsa-miR-31-5p     | 8.376             | 8.265           | 9.134           | 8.685          | 8.699           |
| hsa-miR-762       | 39.200            | 257.288         | 44.121          | 53.170         | 48.544          |
| hsa-miR-454-5p    | 28.406            | 26.062          | 28.112          | 32.092         | 31.193          |
| hsa-miR-639       | 7.222             | 7.353           | 7.481           | 7.338          | 7.255           |
| hsa-miR-1207-5p   | 99.341            | 539.481         | 112.393         | 154.958        | 137.898         |
| hsa-miR-3154      | 8.708             | 9.691           | 9.005           | 9.077          | 8.823           |
| hsa-miR-548p      | 7.937             | 8.207           | 7.934           | 8.041          | 7.961           |
| hsa-miR-4259      | 7.600             | 8.611           | 7.999           | 7.689          | 7.659           |
| hsa-miR-181a-2-3p | 17.565            | 17.384          | 15.038          | 17.085         | 17.747          |
| hsa-miR-3167      | 7.756             | 7.823           | 7.809           | 8.050          | 7.788           |
| hsa-miR-3605-5p   | 8.362             | 8.994           | 8.901           | 8.434          | 8.491           |
| hsa-miR-130b-3p   | 699.243           | 685.615         | 552.337         | 689.529        | 717.528         |
| hsa-miR-342-3p    | 2252.992          | 2913.999        | 2073.658        | 2428.761       | 2625.159        |
| hsa-miR-7-1-3p    | 71.701            | 57.077          | 61.876          | 91.062         | 76.567          |
| hsa-miR-3910      | 7.531             | 7.674           | 7.455           | 7.649          | 7.563           |
| hsa-miR-30c-1-3p  | 9.284             | 10.030          | 9.182           | 9.557          | 9.581           |
| hsa-miR-3656      | 218.259           | 478.107         | 217.045         | 442.383        | 427.535         |
| hsa-miR-539-5p    | 9.164             | 8.786           | 9.334           | 9.378          | 9.449           |
| hsa-miR-183-3p    | 18.929            | 20.302          | 16.121          | 19.733         | 19.916          |
| hsa-miR-199b-5p   | 21.232            | 34.963          | 36.662          | 40.304         | 27.248          |
| hsa-miR-642b-3p   | 36.451            | 115.295         | 34.907          | 48.503         | 43.921          |
| hsa-miR-574-3p    | 194.084           | 349.222         | 259.697         | 236.123        | 282.611         |
| hsa-miR-3186-3p   | 7.501             | 7.750           | 7.912           | 7.717          | 7.568           |
| hsa-miR-1302      | 8.198             | 8.441           | 8.216           | 8.479          | 8.264           |
| hsa-miR-19b-1-5p  | 8.370             | 8.355           | 8.949           | 8.549          | 8.559           |
| hsa-miR-765       | 9.579             | 16.491          | 13.769          | 13.339         | 10.800          |
| hsa-miR-3147      | 7.430             | 8.644           | 7.813           | 7.597          | 7.574           |
| hsa-miR-1202      | 89.553            | 385.738         | 123.498         | 157.177        | 116.337         |
| hsa-miR-4327      | 8.994             | 51.390          | 10.352          | 10.015         | 9.436           |



| <b>miRNA</b>     | <b>median_Con</b> | <b>mean_LCa</b> | <b>mean_NTL</b> | <b>mean_OD</b> | <b>mean_Con</b> |
|------------------|-------------------|-----------------|-----------------|----------------|-----------------|
| hsa-miR-564      | 27.739            | 26.314          | 28.209          | 30.737         | 32.985          |
| hsa-miR-181c-3p  | 9.304             | 9.810           | 10.491          | 9.310          | 9.485           |
| hsa-miR-335-5p   | 24.011            | 20.487          | 21.859          | 30.887         | 26.995          |
| hsa-miR-606      | 7.689             | 7.813           | 7.569           | 7.782          | 7.734           |
| hsa-miR-19b-3p   | 14023.704         | 13663.388       | 18327.915       | 15717.611      | 14407.897       |
| hsa-miR-365a-5p  | 7.198             | 7.790           | 7.595           | 7.416          | 7.319           |
| hsa-miR-3941     | 7.746             | 7.697           | 7.588           | 7.777          | 7.781           |
| hsa-miR-1295a    | 7.963             | 8.545           | 8.324           | 8.182          | 8.037           |
| hsa-miR-1304-5p  | 9.901             | 9.360           | 9.208           | 9.712          | 9.959           |
| hsa-miR-296-5p   | 48.215            | 75.297          | 53.461          | 51.958         | 54.599          |
| hsa-miR-1909-3p  | 7.220             | 7.247           | 7.428           | 7.239          | 7.272           |
| hsa-miR-587      | 7.359             | 7.483           | 7.277           | 7.435          | 7.391           |
| hsa-miR-629-5p   | 95.205            | 106.998         | 80.391          | 95.435         | 99.399          |
| hsa-miR-299-3p   | 7.714             | 7.710           | 7.933           | 7.826          | 7.743           |
| hsa-miR-3660     | 7.547             | 7.819           | 7.784           | 7.704          | 7.609           |
| hsa-miR-4324     | 10.247            | 10.321          | 10.705          | 10.604         | 11.964          |
| hsa-miR-1181     | 11.606            | 33.173          | 14.156          | 12.305         | 12.192          |
| hsa-miR-193b-3p  | 14.382            | 14.393          | 13.066          | 14.204         | 15.212          |
| hsa-miR-20a-3p   | 13.015            | 12.249          | 14.927          | 14.341         | 15.138          |
| hsa-miR-4270     | 26.486            | 609.409         | 29.500          | 41.033         | 30.372          |
| hsa-miR-122-3p   | 8.967             | 9.191           | 8.872           | 9.704          | 9.365           |
| hsa-miR-4255     | 7.157             | 7.339           | 7.298           | 7.305          | 7.177           |
| hsa-miR-424-3p   | 8.739             | 11.215          | 11.306          | 9.995          | 9.452           |
| hsa-miR-216b-5p  | 6.957             | 7.156           | 6.964           | 7.098          | 6.998           |
| hsa-miR-1225-5p  | 110.679           | 780.587         | 138.492         | 201.035        | 159.049         |
| hsa-miR-384      | 8.349             | 8.591           | 8.285           | 8.580          | 8.439           |
| hsa-miR-1305     | 58.769            | 96.092          | 77.815          | 75.902         | 70.380          |
| hsa-miR-376c-3p  | 12.145            | 11.829          | 14.591          | 15.140         | 15.715          |
| hsa-miR-132-3p   | 108.318           | 96.154          | 87.963          | 110.697        | 108.064         |
| hsa-miR-590-3p   | 8.064             | 8.258           | 7.880           | 8.165          | 8.160           |
| hsa-miR-133a-3p  | 12.317            | 13.821          | 11.880          | 13.287         | 13.051          |
| hsa-miR-1255b-5p | 32.202            | 31.850          | 23.728          | 29.265         | 30.521          |
| hsa-miR-3945     | 8.483             | 17.470          | 8.765           | 8.937          | 8.604           |
| hsa-miR-1268a    | 42.334            | 148.941         | 46.235          | 76.801         | 67.481          |
| hsa-miR-148b-5p  | 12.218            | 11.762          | 13.788          | 13.922         | 13.187          |
| hsa-miR-3125     | 28.406            | 41.583          | 34.534          | 33.112         | 31.686          |
| hsa-miR-643      | 7.738             | 7.780           | 7.918           | 8.115          | 7.886           |
| hsa-miR-3130-3p  | 7.136             | 7.226           | 7.350           | 7.268          | 7.159           |

| <b>miRNA</b>     | <b>median_Con</b> | <b>mean_LCa</b> | <b>mean_NTL</b> | <b>mean_OD</b> | <b>mean_Con</b> |
|------------------|-------------------|-----------------|-----------------|----------------|-----------------|
| hsa-miR-26b-3p   | 12.985            | 13.207          | 13.154          | 14.614         | 13.771          |
| hsa-miR-1976     | 13.015            | 16.788          | 13.954          | 15.043         | 14.150          |
| hsa-miR-9-3p     | 8.131             | 8.078           | 8.207           | 8.589          | 8.389           |
| hsa-miR-532-3p   | 1589.540          | 2120.201        | 1559.224        | 1820.271       | 1839.313        |
| hsa-miR-154-3p   | 8.515             | 8.320           | 8.587           | 8.704          | 8.676           |
| hsa-miR-744-5p   | 89.553            | 112.661         | 80.942          | 93.085         | 94.798          |
| hsa-miR-450b-5p  | 8.341             | 8.529           | 8.193           | 8.461          | 8.406           |
| hsa-miR-3201     | 6.753             | 6.935           | 6.747           | 6.927          | 6.813           |
| hsa-miR-3161     | 8.441             | 9.120           | 8.533           | 8.601          | 8.544           |
| hsa-miR-1245a    | 8.001             | 8.025           | 7.832           | 8.026          | 8.007           |
| hsa-miR-98-5p    | 85.932            | 96.946          | 95.312          | 106.091        | 138.098         |
| hsa-miR-3911     | 9.117             | 41.349          | 10.958          | 9.881          | 9.481           |
| hsa-miR-365a-3p  | 247.251           | 316.191         | 218.488         | 289.530        | 261.361         |
| hsa-miR-551b-3p  | 9.023             | 8.858           | 9.485           | 9.571          | 9.380           |
| hsa-miR-24-2-5p  | 7.046             | 7.227           | 7.065           | 7.178          | 7.062           |
| hsa-miR-3135a    | 7.064             | 7.297           | 7.199           | 7.221          | 7.109           |
| hsa-miR-150-5p   | 12797.198         | 15953.943       | 11091.244       | 12261.313      | 15314.429       |
| hsa-miR-3137     | 10.685            | 14.046          | 11.522          | 12.294         | 12.157          |
| hsa-miR-18a-3p   | 15.021            | 14.811          | 13.799          | 16.395         | 15.836          |
| hsa-miR-3179     | 8.703             | 9.212           | 8.522           | 8.858          | 8.808           |
| hsa-miR-214-3p   | 7.324             | 7.939           | 7.583           | 7.576          | 7.502           |
| hsa-miR-138-1-3p | 7.623             | 7.694           | 7.424           | 7.633          | 7.655           |
| hsa-miR-656-3p   | 8.987             | 9.191           | 8.845           | 9.394          | 9.287           |
| hsa-miR-3926     | 10.365            | 15.552          | 11.575          | 11.398         | 12.122          |
| hsa-miR-3616-3p  | 12.870            | 12.506          | 12.968          | 13.397         | 14.547          |
| hsa-miR-1322     | 7.554             | 7.610           | 7.400           | 7.529          | 7.649           |
| hsa-miR-20b-3p   | 7.269             | 7.191           | 7.382           | 7.302          | 7.298           |
| hsa-miR-4293     | 7.168             | 7.149           | 7.064           | 7.234          | 7.202           |
| hsa-miR-766-3p   | 123.477           | 197.538         | 132.711         | 159.808        | 169.392         |
| hsa-miR-515-5p   | 8.717             | 8.720           | 8.402           | 8.886          | 8.942           |
| hsa-miR-135a-3p  | 11.153            | 25.291          | 17.452          | 14.622         | 12.216          |
| hsa-miR-1263     | 7.700             | 7.560           | 7.643           | 7.708          | 7.740           |
| hsa-miR-1273c    | 9.134             | 10.669          | 10.409          | 9.764          | 9.280           |
| hsa-miR-30c-5p   | 7236.077          | 7315.645        | 5897.897        | 7421.570       | 7440.270        |
| hsa-miR-550b-3p  | 8.638             | 8.290           | 8.501           | 8.533          | 8.677           |
| hsa-miR-1275     | 41.352            | 105.595         | 49.912          | 61.635         | 58.047          |
| hsa-miR-3934-5p  | 10.392            | 13.565          | 12.575          | 11.244         | 11.166          |
| hsa-miR-187-3p   | 7.359             | 7.411           | 7.229           | 7.415          | 7.404           |

| <b>miRNA</b>    | <b>median_Con</b> | <b>mean_LCa</b> | <b>mean_NTLD</b> | <b>mean_OD</b> | <b>mean_Con</b> |
|-----------------|-------------------|-----------------|------------------|----------------|-----------------|
| hsa-let-7a-3p   | 9.160             | 9.187           | 8.968            | 9.511          | 9.506           |
| hsa-miR-208b-3p | 7.492             | 7.647           | 7.453            | 7.892          | 7.532           |
| hsa-miR-494-3p  | 559.649           | 1937.131        | 1468.182         | 1408.141       | 935.265         |
| hsa-miR-486-3p  | 7.527             | 8.025           | 8.190            | 7.913          | 7.651           |
| hsa-let-7d-3p   | 14.050            | 22.254          | 23.244           | 24.882         | 19.940          |
| hsa-miR-491-5p  | 8.581             | 8.648           | 8.359            | 8.574          | 8.901           |
| hsa-miR-146b-5p | 45.488            | 49.978          | 60.021           | 75.652         | 57.685          |
| hsa-miR-143-3p  | 7.909             | 8.061           | 8.550            | 8.405          | 8.156           |
| hsa-miR-3197    | 8.340             | 8.270           | 8.179            | 8.499          | 8.388           |
| hsa-miR-3118    | 8.331             | 8.458           | 8.231            | 8.486          | 8.377           |
| hsa-miR-361-5p  | 333.518           | 404.046         | 302.416          | 368.298        | 345.550         |
| hsa-miR-208a-3p | 7.318             | 7.442           | 7.280            | 7.438          | 7.340           |
| hsa-miR-617     | 10.534            | 11.350          | 10.392           | 11.728         | 11.660          |
| hsa-miR-542-5p  | 15.021            | 17.621          | 18.304           | 15.145         | 16.679          |
| hsa-miR-1301-3p | 8.205             | 8.484           | 8.210            | 8.182          | 8.253           |
| hsa-miR-379-5p  | 7.609             | 7.590           | 7.950            | 7.835          | 7.796           |
| hsa-miR-33b-3p  | 17.816            | 44.793          | 23.381           | 37.412         | 35.376          |
| hsa-miR-379-3p  | 8.080             | 7.975           | 7.977            | 8.149          | 8.121           |
| hsa-miR-423-3p  | 39.796            | 51.586          | 40.391           | 46.573         | 45.701          |
| hsa-miR-103b    | 8.947             | 9.181           | 8.783            | 9.236          | 9.118           |
| hsa-miR-375     | 7.242             | 8.330           | 7.355            | 7.293          | 7.249           |
| hsa-miR-4271    | 14.617            | 35.111          | 16.305           | 16.835         | 17.004          |
| hsa-miR-3126-5p | 7.275             | 7.488           | 7.370            | 7.383          | 7.305           |
| hsa-miR-326     | 41.034            | 60.121          | 49.967           | 42.263         | 46.549          |
| hsa-miR-1228-3p | 29.470            | 64.876          | 35.038           | 51.605         | 47.039          |
| hsa-miR-1307-3p | 12.678            | 15.414          | 12.416           | 15.242         | 14.301          |
| hsa-miR-138-5p  | 7.345             | 7.387           | 7.610            | 7.410          | 7.402           |
| hsa-miR-183-5p  | 380.311           | 514.140         | 559.370          | 517.537        | 449.904         |
| hsa-miR-1273e   | 10.685            | 12.328          | 10.469           | 11.852         | 11.803          |
| hsa-miR-4323    | 53.570            | 71.126          | 53.803           | 62.342         | 62.415          |
| hsa-miR-3937    | 8.751             | 23.679          | 8.877            | 9.107          | 8.958           |
| hsa-miR-3176    | 13.874            | 14.608          | 12.706           | 14.426         | 14.838          |
| hsa-miR-711     | 7.356             | 10.435          | 7.857            | 7.572          | 7.462           |
| hsa-miR-449c-3p | 8.470             | 8.505           | 9.050            | 8.433          | 8.710           |
| hsa-miR-4253    | 8.156             | 9.441           | 8.315            | 8.353          | 8.327           |
| hsa-miR-153-3p  | 7.530             | 7.692           | 7.514            | 7.630          | 7.551           |
| hsa-miR-337-3p  | 18.564            | 19.553          | 24.459           | 25.422         | 22.283          |
| hsa-miR-4299    | 570.760           | 829.321         | 588.476          | 707.140        | 688.287         |

| miRNA            | median_Con | mean_LCa | mean_NTL | mean_OD | mean_Con |
|------------------|------------|----------|----------|---------|----------|
| hsa-miR-3606-5p  | 8.286      | 8.618    | 8.251    | 8.519   | 8.386    |
| hsa-miR-30b-3p   | 8.696      | 8.976    | 9.106    | 8.786   | 8.795    |
| hsa-miR-3168     | 7.562      | 7.616    | 7.527    | 7.691   | 7.596    |
| hsa-miR-890      | 7.281      | 7.488    | 7.352    | 7.432   | 7.322    |
| hsa-miR-3193     | 7.433      | 7.686    | 7.518    | 7.555   | 7.458    |
| hsa-miR-1321     | 7.393      | 7.700    | 7.602    | 7.535   | 7.434    |
| hsa-miR-22-5p    | 30.191     | 27.537   | 27.852   | 36.245  | 31.004   |
| hsa-miR-516b-5p  | 7.656      | 7.907    | 7.849    | 7.845   | 7.703    |
| hsa-miR-3155a    | 7.574      | 7.743    | 7.682    | 7.697   | 7.588    |
| hsa-miR-3917     | 9.012      | 10.842   | 9.209    | 9.554   | 9.645    |
| hsa-miR-10b-5p   | 11.565     | 51.212   | 10.922   | 12.411  | 11.999   |
| hsa-miR-3189-3p  | 7.506      | 7.684    | 7.866    | 7.635   | 7.573    |
| hsa-miR-29b-2-5p | 8.902      | 8.737    | 9.054    | 9.272   | 9.371    |
| hsa-miR-3609     | 8.334      | 8.889    | 8.457    | 8.564   | 8.454    |
| hsa-miR-518f-3p  | 8.322      | 8.345    | 8.152    | 8.369   | 8.388    |
| hsa-miR-210-3p   | 526.531    | 662.485  | 635.054  | 588.137 | 571.865  |
| hsa-miR-1231     | 6.704      | 6.808    | 6.650    | 6.761   | 6.731    |
| hsa-miR-378c     | 7.431      | 7.911    | 7.635    | 7.751   | 7.564    |
| hsa-miR-4257     | 11.916     | 15.840   | 13.692   | 12.649  | 13.310   |
| hsa-miR-3180-3p  | 57.679     | 93.959   | 59.690   | 85.053  | 68.889   |
| hsa-miR-3677-3p  | 7.089      | 7.232    | 7.280    | 7.060   | 7.136    |
| hsa-miR-374a-3p  | 8.312      | 8.625    | 8.236    | 8.444   | 8.417    |
| hsa-miR-568      | 8.104      | 8.322    | 8.070    | 8.202   | 8.150    |
| hsa-miR-3659     | 7.702      | 7.922    | 8.127    | 7.834   | 7.730    |
| hsa-miR-431-3p   | 8.188      | 8.128    | 8.128    | 8.322   | 8.215    |
| hsa-miR-409-3p   | 79.299     | 100.176  | 69.459   | 87.775  | 97.469   |
| hsa-miR-3652     | 18.781     | 28.059   | 22.928   | 21.784  | 22.095   |
| hsa-miR-1972     | 12.053     | 86.272   | 19.526   | 34.188  | 43.858   |
| hsa-miR-498      | 8.433      | 9.820    | 8.634    | 8.510   | 8.788    |
| hsa-miR-2276-3p  | 9.843      | 15.868   | 10.632   | 11.633  | 10.305   |
| hsa-miR-323b-5p  | 7.523      | 7.558    | 7.727    | 7.640   | 7.555    |
| hsa-miR-369-5p   | 9.608      | 9.420    | 10.622   | 10.361  | 10.207   |
| hsa-miR-1234-3p  | 30.191     | 62.641   | 40.756   | 51.254  | 46.494   |
| hsa-miR-1183     | 8.909      | 18.800   | 10.801   | 11.598  | 11.498   |
| hsa-miR-1261     | 7.564      | 7.627    | 7.772    | 7.682   | 7.599    |
| hsa-miR-3188     | 9.469      | 18.157   | 9.322    | 10.429  | 11.223   |
| hsa-miR-3202     | 8.689      | 13.853   | 9.063    | 8.791   | 8.749    |
| hsa-miR-577      | 8.094      | 8.322    | 8.084    | 8.250   | 8.157    |

| miRNA           | median_Con | mean_LCa  | mean_NTL  | mean_OD   | mean_Con  |
|-----------------|------------|-----------|-----------|-----------|-----------|
| hsa-miR-1208    | 7.665      | 7.911     | 7.883     | 7.810     | 7.715     |
| hsa-miR-92b-3p  | 16.315     | 22.137    | 18.159    | 20.400    | 19.818    |
| hsa-miR-1284    | 8.042      | 7.836     | 8.169     | 8.131     | 8.115     |
| hsa-miR-3944-3p | 7.418      | 7.359     | 7.514     | 7.369     | 7.427     |
| hsa-miR-28-5p   | 110.679    | 103.675   | 101.051   | 122.917   | 112.442   |
| hsa-miR-1262    | 7.700      | 7.870     | 7.638     | 7.826     | 7.781     |
| hsa-miR-3610    | 8.169      | 13.137    | 8.245     | 8.203     | 8.265     |
| hsa-miR-519e-5p | 8.068      | 8.428     | 8.379     | 8.131     | 8.183     |
| hsa-miR-548j-5p | 8.362      | 8.332     | 8.261     | 8.639     | 8.778     |
| hsa-miR-3936    | 7.376      | 7.556     | 7.501     | 7.483     | 7.397     |
| hsa-miR-135b-3p | 7.006      | 7.217     | 7.066     | 7.132     | 7.056     |
| hsa-miR-708-5p  | 7.826      | 7.854     | 7.745     | 7.948     | 7.888     |
| hsa-miR-323b-3p | 6.999      | 7.014     | 7.066     | 6.926     | 6.994     |
| hsa-miR-124-5p  | 7.607      | 7.615     | 7.587     | 7.738     | 7.631     |
| hsa-miR-611     | 7.326      | 7.215     | 7.217     | 7.224     | 7.354     |
| hsa-miR-188-5p  | 17.081     | 56.975    | 21.142    | 20.625    | 19.195    |
| hsa-miR-377-3p  | 10.126     | 10.442    | 12.454    | 11.408    | 11.330    |
| hsa-miR-1229-3p | 13.045     | 15.874    | 15.473    | 15.162    | 14.471    |
| hsa-miR-604     | 7.820      | 7.934     | 7.857     | 8.038     | 7.874     |
| hsa-miR-3122    | 7.301      | 7.415     | 7.453     | 7.419     | 7.313     |
| hsa-miR-361-3p  | 618.349    | 788.975   | 586.078   | 585.162   | 660.977   |
| hsa-miR-4313    | 27.412     | 47.357    | 34.086    | 48.853    | 43.210    |
| hsa-miR-449b-3p | 9.187      | 9.640     | 17.632    | 11.750    | 10.631    |
| hsa-miR-654-5p  | 8.944      | 9.309     | 8.963     | 8.945     | 9.082     |
| hsa-miR-1272    | 7.481      | 7.566     | 7.469     | 7.591     | 7.493     |
| hsa-let-7a-5p   | 21787.992  | 22018.934 | 22482.867 | 23167.550 | 23107.081 |
| hsa-miR-9-5p    | 8.119      | 8.144     | 8.150     | 8.359     | 8.189     |
| hsa-miR-2114-3p | 7.574      | 7.728     | 7.744     | 7.686     | 7.603     |
| hsa-miR-1182    | 7.301      | 8.851     | 7.981     | 7.582     | 7.478     |
| hsa-miR-583     | 7.507      | 7.676     | 7.399     | 7.534     | 7.513     |
| hsa-miR-1297    | 7.357      | 7.519     | 7.357     | 7.484     | 7.387     |
| hsa-miR-933     | 12.007     | 15.637    | 12.475    | 14.633    | 14.754    |
| hsa-miR-24-1-5p | 8.405      | 8.497     | 8.771     | 8.511     | 8.477     |
| hsa-miR-199a-3p | 30.191     | 41.257    | 46.421    | 41.094    | 41.248    |
| hsa-miR-675-3p  | 8.527      | 8.716     | 9.031     | 8.665     | 8.664     |
| hsa-miR-2355-5p | 8.262      | 8.428     | 8.795     | 8.450     | 8.311     |
| hsa-let-7b-5p   | 15579.719  | 18245.724 | 16382.340 | 15325.656 | 16782.823 |
| hsa-miR-202-3p  | 8.729      | 9.259     | 10.197    | 8.804     | 8.848     |

| miRNA             | median_Con | mean_LCa | mean_NTL | mean_OD | mean_Con |
|-------------------|------------|----------|----------|---------|----------|
| hsa-miR-664a-5p   | 26.778     | 46.082   | 36.982   | 34.675  | 32.040   |
| hsa-miR-219a-2-3p | 7.712      | 7.616    | 7.749    | 7.773   | 7.729    |
| hsa-miR-1273d     | 7.594      | 9.355    | 8.264    | 8.330   | 8.245    |
| hsa-miR-3140-3p   | 7.891      | 7.892    | 8.116    | 8.094   | 7.992    |
| hsa-miR-935       | 7.742      | 7.728    | 7.912    | 7.728   | 7.782    |
| hsa-miR-875-3p    | 7.245      | 7.445    | 7.403    | 7.372   | 7.285    |
| hsa-miR-545-3p    | 8.854      | 8.879    | 9.273    | 8.906   | 8.961    |
| hsa-miR-127-3p    | 14.157     | 16.187   | 13.740   | 15.702  | 15.394   |
| hsa-miR-3616-5p   | 7.808      | 7.978    | 7.800    | 7.863   | 7.827    |
| hsa-miR-137       | 7.500      | 7.539    | 7.377    | 7.534   | 7.506    |
| hsa-miR-3665      | 109.498    | 269.579  | 128.277  | 203.711 | 202.298  |
| hsa-miR-192-3p    | 13.382     | 13.917   | 16.417   | 15.544  | 14.307   |
| hsa-miR-671-5p    | 17.320     | 44.542   | 21.896   | 25.085  | 22.124   |
| hsa-miR-431-5p    | 9.160      | 9.323    | 9.958    | 9.309   | 9.904    |
| hsa-miR-668-3p    | 8.585      | 8.435    | 8.764    | 8.461   | 8.724    |
| hsa-miR-100-3p    | 8.175      | 8.189    | 8.000    | 8.188   | 8.213    |
| hsa-miR-1911-3p   | 8.074      | 7.949    | 8.257    | 8.101   | 8.162    |
| hsa-miR-1224-5p   | 13.165     | 25.144   | 14.600   | 17.209  | 16.568   |
| hsa-miR-186-5p    | 762.429    | 1343.173 | 933.402  | 972.185 | 825.793  |
| hsa-miR-3648      | 9.983      | 70.305   | 11.346   | 10.117  | 10.262   |
| hsa-miR-148b-3p   | 227.320    | 211.369  | 265.009  | 234.333 | 225.180  |
| hsa-miR-378a-3p   | 194.084    | 259.988  | 186.855  | 242.975 | 200.007  |
| hsa-miR-3658      | 7.470      | 7.634    | 7.501    | 7.636   | 7.516    |
| hsa-miR-3184-5p   | 7.936      | 7.887    | 7.833    | 7.974   | 7.956    |
| hsa-miR-1233-3p   | 8.325      | 8.450    | 8.710    | 8.452   | 8.365    |
| hsa-miR-566       | 8.610      | 9.905    | 8.952    | 8.903   | 9.006    |
| hsa-miR-548c-3p   | 9.348      | 9.521    | 9.444    | 9.958   | 10.087   |
| hsa-miR-4251      | 7.209      | 7.495    | 7.365    | 7.379   | 7.246    |
| hsa-miR-1471      | 8.355      | 18.973   | 11.162   | 11.295  | 10.273   |
| hsa-miR-2115-3p   | 7.922      | 7.982    | 7.904    | 8.094   | 7.957    |
| hsa-miR-630       | 9.077      | 51.053   | 27.962   | 18.390  | 10.807   |
| hsa-miR-4274      | 12.495     | 20.928   | 13.659   | 15.295  | 14.654   |
| hsa-miR-571       | 8.734      | 9.588    | 8.750    | 9.636   | 9.565    |
| hsa-miR-125a-3p   | 19.714     | 26.581   | 21.553   | 23.162  | 22.207   |
| hsa-miR-518e-5p   | 7.618      | 7.790    | 7.840    | 7.750   | 7.640    |
| hsa-miR-184       | 8.110      | 8.658    | 8.462    | 9.642   | 8.199    |
| hsa-miR-551b-5p   | 6.934      | 7.117    | 7.037    | 6.979   | 6.970    |
| hsa-miR-3916      | 8.047      | 7.850    | 8.125    | 8.058   | 8.078    |

| miRNA             | median_Con | mean_LCa  | mean_NTL  | mean_OD   | mean_Con  |
|-------------------|------------|-----------|-----------|-----------|-----------|
| hsa-miR-509-3p    | 7.532      | 7.674     | 7.687     | 7.753     | 7.588     |
| hsa-miR-10a-5p    | 37.514     | 55.109    | 36.111    | 46.909    | 43.010    |
| hsa-miR-646       | 7.605      | 7.486     | 7.605     | 7.481     | 7.603     |
| hsa-miR-518b      | 8.499      | 8.889     | 8.649     | 8.796     | 8.575     |
| hsa-miR-410-3p    | 9.081      | 9.251     | 10.221    | 9.816     | 10.022    |
| hsa-miR-411-3p    | 8.118      | 7.840     | 8.435     | 8.207     | 8.213     |
| hsa-miR-3918      | 7.314      | 7.525     | 7.411     | 7.426     | 7.349     |
| hsa-miR-30d-3p    | 8.169      | 8.122     | 8.346     | 8.279     | 8.210     |
| hsa-miR-1-3p      | 7.574      | 7.893     | 7.752     | 7.867     | 7.669     |
| hsa-miR-4252      | 8.736      | 9.037     | 9.730     | 9.075     | 8.976     |
| hsa-miR-601       | 8.360      | 9.738     | 8.568     | 8.614     | 8.490     |
| hsa-miR-3605-3p   | 14.857     | 16.654    | 14.623    | 17.078    | 15.669    |
| hsa-miR-3679-3p   | 12.985     | 16.904    | 13.702    | 15.846    | 15.050    |
| hsa-miR-487b-3p   | 15.821     | 15.267    | 17.927    | 16.969    | 17.402    |
| hsa-miR-362-5p    | 312.738    | 407.710   | 339.629   | 322.049   | 329.611   |
| hsa-miR-922       | 7.174      | 7.211     | 7.049     | 7.169     | 7.194     |
| hsa-miR-3654      | 7.412      | 7.843     | 7.851     | 7.639     | 7.491     |
| hsa-miR-3940-3p   | 17.949     | 23.315    | 22.456    | 20.377    | 20.904    |
| hsa-miR-3667-3p   | 8.465      | 8.314     | 8.559     | 8.504     | 8.545     |
| hsa-miR-138-2-3p  | 10.273     | 12.161    | 10.622    | 11.010    | 11.343    |
| hsa-miR-378a-5p   | 99.341     | 159.618   | 127.403   | 113.282   | 111.626   |
| hsa-miR-28-3p     | 8.510      | 8.891     | 8.306     | 8.661     | 8.606     |
| hsa-miR-141-3p    | 7.815      | 9.215     | 8.234     | 7.881     | 7.870     |
| hsa-miR-615-5p    | 7.687      | 8.046     | 7.687     | 7.873     | 7.787     |
| hsa-miR-622       | 8.790      | 13.651    | 9.511     | 10.096    | 10.204    |
| hsa-miR-3175      | 7.072      | 7.195     | 7.129     | 7.175     | 7.087     |
| hsa-miR-1237-3p   | 16.114     | 23.145    | 18.816    | 21.555    | 19.861    |
| hsa-miR-297       | 7.573      | 7.575     | 7.421     | 7.530     | 7.613     |
| hsa-miR-4318      | 55.551     | 58.193    | 63.627    | 60.026    | 85.258    |
| hsa-miR-103a-2-5p | 23.272     | 21.091    | 22.543    | 24.877    | 23.791    |
| hsa-miR-659-3p    | 8.053      | 10.956    | 8.568     | 8.318     | 8.165     |
| hsa-miR-548g-3p   | 9.142      | 9.656     | 9.132     | 9.465     | 9.527     |
| hsa-miR-525-5p    | 8.168      | 8.427     | 8.386     | 8.239     | 8.224     |
| hsa-miR-4269      | 7.903      | 8.438     | 8.907     | 8.191     | 8.239     |
| hsa-miR-140-3p    | 10899.865  | 13194.546 | 11510.801 | 10380.541 | 10955.354 |
| hsa-miR-193b-5p   | 7.787      | 8.333     | 7.979     | 8.101     | 7.821     |
| hsa-miR-3115      | 8.251      | 8.093     | 8.348     | 8.406     | 8.353     |
| hsa-miR-4280      | 7.792      | 7.960     | 7.901     | 8.006     | 7.832     |

| <b>miRNA</b>    | <b>median_Con</b> | <b>mean_LCa</b> | <b>mean_NTLD</b> | <b>mean_OD</b> | <b>mean_Con</b> |
|-----------------|-------------------|-----------------|------------------|----------------|-----------------|
| hsa-miR-641     | 10.392            | 10.596          | 10.045           | 11.037         | 10.753          |
| hsa-miR-3065-5p | 7.685             | 7.826           | 7.727            | 7.832          | 7.726           |
| hsa-miR-1255a   | 9.522             | 9.608           | 9.196            | 9.892          | 9.802           |
| hsa-miR-934     | 6.837             | 6.968           | 7.045            | 6.950          | 6.894           |
| hsa-miR-448     | 8.422             | 8.579           | 8.306            | 8.471          | 8.487           |
| hsa-miR-3675-3p | 12.899            | 16.018          | 13.657           | 16.437         | 15.519          |
| hsa-miR-589-3p  | 10.069            | 11.035          | 9.870            | 10.279         | 10.251          |
| hsa-miR-3130-5p | 9.238             | 9.256           | 8.858            | 9.111          | 9.321           |
| hsa-miR-4254    | 8.915             | 9.683           | 12.035           | 10.775         | 10.838          |
| hsa-miR-3909    | 6.994             | 7.098           | 7.128            | 7.018          | 7.021           |
| hsa-miR-3132    | 7.681             | 8.201           | 8.274            | 8.067          | 7.816           |
| hsa-miR-637     | 7.881             | 7.751           | 7.939            | 7.922          | 7.903           |
| hsa-miR-1276    | 7.800             | 8.032           | 7.874            | 7.833          | 7.863           |
| hsa-miR-3194-5p | 8.744             | 28.577          | 9.602            | 9.153          | 8.962           |
| hsa-miR-30b-5p  | 15579.719         | 13669.715       | 14795.974        | 16070.368      | 15115.033       |
| hsa-miR-329-3p  | 15.108            | 15.500          | 14.626           | 16.667         | 16.454          |
| hsa-miR-221-5p  | 10.918            | 11.495          | 12.164           | 12.592         | 11.896          |
| hsa-miR-10b-3p  | 8.087             | 8.481           | 8.491            | 8.330          | 8.152           |
| hsa-miR-663a    | 10.883            | 31.139          | 14.384           | 15.479         | 12.409          |
| hsa-miR-3672    | 8.164             | 8.376           | 8.196            | 8.338          | 8.217           |
| hsa-miR-377-5p  | 8.226             | 8.192           | 8.251            | 8.091          | 8.262           |
| hsa-miR-650     | 8.550             | 9.046           | 8.565            | 8.525          | 9.168           |
| hsa-miR-146a-5p | 159.192           | 163.506         | 134.961          | 175.216        | 162.089         |
| hsa-miR-3117-3p | 8.340             | 8.473           | 8.897            | 8.597          | 8.641           |
| hsa-miR-127-5p  | 6.999             | 7.035           | 7.139            | 7.044          | 7.009           |
| hsa-miR-892a    | 8.490             | 8.468           | 8.322            | 8.510          | 8.602           |
| hsa-miR-1247-5p | 7.754             | 7.933           | 7.935            | 7.857          | 7.767           |
| hsa-let-7c-5p   | 3017.032          | 4044.822        | 3351.386         | 3156.361       | 3625.031        |
| hsa-miR-1277-3p | 8.680             | 8.988           | 8.581            | 8.889          | 8.900           |
| hsa-miR-132-5p  | 9.825             | 9.645           | 9.881            | 10.153         | 10.087          |
| hsa-miR-550a-3p | 1070.925          | 1223.309        | 1023.883         | 1210.396       | 1147.657        |
| hsa-miR-3924    | 8.751             | 8.950           | 9.058            | 8.894          | 9.047           |
| hsa-miR-452-5p  | 7.227             | 7.395           | 7.259            | 7.335          | 7.270           |
| hsa-miR-380-3p  | 8.820             | 8.903           | 8.783            | 9.184          | 9.161           |
| hsa-miR-638     | 79.299            | 189.234         | 103.955          | 184.167        | 148.408         |
| hsa-miR-548s    | 7.922             | 8.091           | 7.912            | 7.966          | 7.953           |
| hsa-miR-1908-5p | 7.862             | 8.197           | 7.908            | 8.037          | 7.943           |
| hsa-miR-760     | 8.826             | 9.243           | 8.670            | 8.941          | 8.974           |



| <b>miRNA</b>     | <b>median_Con</b> | <b>mean_LCa</b> | <b>mean_NTL</b> | <b>mean_OD</b> | <b>mean_Con</b> |
|------------------|-------------------|-----------------|-----------------|----------------|-----------------|
| hsa-miR-3925-5p  | 7.560             | 7.778           | 7.664           | 7.611          | 7.578           |
| hsa-miR-1207-3p  | 8.125             | 7.966           | 8.027           | 8.069          | 8.175           |
| hsa-miR-3929     | 7.477             | 7.637           | 7.542           | 7.591          | 7.501           |
| hsa-miR-509-5p   | 8.231             | 8.492           | 8.167           | 8.439          | 8.316           |
| hsa-miR-106a-3p  | 8.283             | 8.162           | 8.128           | 8.327          | 8.340           |
| hsa-miR-3920     | 9.337             | 9.613           | 9.298           | 9.852          | 9.762           |
| hsa-miR-654-3p   | 27.089            | 28.055          | 32.112          | 33.803         | 32.982          |
| hsa-miR-3123     | 7.437             | 7.526           | 7.405           | 7.517          | 7.445           |
| hsa-miR-542-3p   | 8.189             | 8.306           | 8.686           | 8.650          | 8.446           |
| hsa-miR-4272     | 7.533             | 7.693           | 7.613           | 7.667          | 7.552           |
| hsa-miR-1206     | 7.943             | 8.010           | 7.844           | 7.999          | 7.988           |
| hsa-miR-223-3p   | 78654.362         | 66883.229       | 73717.484       | 74609.102      | 71126.676       |
| hsa-miR-576-5p   | 10.047            | 10.100          | 10.564          | 11.655         | 11.231          |
| hsa-miR-920      | 6.909             | 7.041           | 6.990           | 7.046          | 6.940           |
| hsa-miR-802      | 8.064             | 8.096           | 7.929           | 8.082          | 8.083           |
| hsa-miR-200c-3p  | 22.594            | 23.589          | 19.130          | 20.699         | 22.123          |
| hsa-miR-466      | 8.717             | 9.327           | 11.254          | 9.575          | 10.071          |
| hsa-miR-34a-5p   | 14.939            | 25.599          | 20.910          | 23.930         | 17.449          |
| hsa-miR-485-3p   | 20.573            | 29.951          | 26.461          | 24.443         | 25.578          |
| hsa-miR-331-3p   | 6759.712          | 8544.537        | 8061.984        | 6823.394       | 7290.712        |
| hsa-miR-761      | 7.122             | 7.238           | 7.248           | 7.235          | 7.145           |
| hsa-miR-572      | 12.495            | 14.285          | 15.947          | 16.322         | 16.447          |
| hsa-miR-376a-3p  | 15.108            | 16.059          | 17.909          | 19.569         | 19.483          |
| hsa-miR-3150b-3p | 7.390             | 7.538           | 7.482           | 7.395          | 7.403           |
| hsa-miR-1910-5p  | 8.387             | 9.054           | 11.094          | 10.287         | 9.984           |
| hsa-miR-512-3p   | 8.540             | 8.712           | 8.478           | 8.622          | 8.569           |
| hsa-miR-548d-3p  | 8.424             | 8.236           | 8.444           | 8.554          | 8.494           |
| hsa-miR-3682-3p  | 9.069             | 10.442          | 9.768           | 9.722          | 9.275           |
| hsa-miR-3617-5p  | 7.709             | 7.960           | 7.765           | 7.838          | 7.735           |
| hsa-miR-338-5p   | 8.156             | 8.488           | 8.068           | 8.986          | 8.691           |
| hsa-miR-758-3p   | 10.504            | 10.378          | 11.059          | 11.106         | 11.299          |
| hsa-miR-141-5p   | 7.375             | 7.332           | 7.308           | 7.421          | 7.395           |
| hsa-miR-1246     | 38.073            | 98.700          | 83.289          | 91.136         | 60.341          |
| hsa-miR-30e-3p   | 113.066           | 165.467         | 168.926         | 183.882        | 135.644         |
| hsa-miR-224-5p   | 10.352            | 11.246          | 10.632          | 11.820         | 11.552          |
| hsa-miR-3146     | 7.333             | 7.468           | 7.445           | 7.516          | 7.392           |
| hsa-miR-450b-3p  | 8.441             | 8.474           | 8.349           | 8.596          | 8.587           |
| hsa-miR-3928-3p  | 7.367             | 7.354           | 7.472           | 7.411          | 7.381           |

| <b>miRNA</b>     | <b>median_Con</b> | <b>mean_LCa</b> | <b>mean_NTLD</b> | <b>mean_OD</b> | <b>mean_Con</b> |
|------------------|-------------------|-----------------|------------------|----------------|-----------------|
| hsa-miR-892b     | 17.320            | 20.940          | 18.803           | 18.625         | 18.656          |
| hsa-miR-3116     | 7.231             | 7.353           | 7.276            | 7.341          | 7.257           |
| hsa-miR-4258     | 8.032             | 7.996           | 8.208            | 7.985          | 8.132           |
| hsa-miR-323a-3p  | 13.225            | 13.888          | 12.826           | 14.303         | 14.969          |
| hsa-miR-147b     | 7.673             | 7.644           | 7.744            | 7.796          | 7.729           |
| hsa-miR-563      | 12.814            | 17.074          | 15.599           | 18.001         | 16.044          |
| hsa-miR-2116-5p  | 7.926             | 7.942           | 7.839            | 7.979          | 7.942           |
| hsa-miR-92a-3p   | 78654.360         | 80873.818       | 71404.177        | 68824.442      | 74235.119       |
| hsa-miR-520h     | 8.414             | 8.436           | 8.492            | 8.820          | 8.608           |
| hsa-miR-4322     | 7.719             | 16.113          | 7.593            | 7.875          | 7.906           |
| hsa-miR-3713     | 7.441             | 8.116           | 7.806            | 7.639          | 7.484           |
| hsa-miR-371a-5p  | 9.243             | 11.307          | 9.348            | 9.664          | 9.816           |
| hsa-miR-3655     | 7.518             | 7.466           | 7.591            | 7.576          | 7.535           |
| hsa-miR-31-3p    | 8.155             | 8.104           | 8.028            | 8.143          | 8.180           |
| hsa-miR-1271-5p  | 32.202            | 33.163          | 29.843           | 35.605         | 33.892          |
| hsa-miR-561-3p   | 7.715             | 7.894           | 7.710            | 7.773          | 7.752           |
| hsa-miR-301b-3p  | 8.200             | 8.145           | 8.465            | 8.276          | 8.339           |
| hsa-miR-3164     | 8.278             | 8.447           | 8.244            | 8.469          | 8.350           |
| hsa-miR-3622a-5p | 7.150             | 7.365           | 7.308            | 7.329          | 7.177           |
| hsa-miR-302c-5p  | 7.050             | 7.112           | 7.204            | 7.073          | 7.063           |
| hsa-miR-602      | 14.382            | 19.566          | 17.507           | 18.751         | 17.892          |
| hsa-miR-4305     | 7.789             | 7.651           | 7.834            | 7.758          | 7.830           |
| hsa-miR-625-3p   | 13.839            | 15.481          | 14.144           | 15.160         | 14.934          |
| hsa-miR-382-5p   | 9.564             | 9.697           | 9.818            | 10.003         | 10.437          |
| hsa-miR-2053     | 9.214             | 9.633           | 9.260            | 9.860          | 9.790           |
| hsa-miR-3607-5p  | 8.238             | 8.710           | 9.627            | 8.892          | 8.800           |
| hsa-miR-3685     | 8.863             | 8.916           | 8.755            | 9.133          | 9.022           |
| hsa-miR-3133     | 8.994             | 9.048           | 9.108            | 9.229          | 9.170           |
| hsa-miR-4264     | 7.704             | 7.682           | 7.642            | 7.829          | 7.751           |
| hsa-miR-557      | 11.938            | 30.040          | 11.789           | 12.090         | 13.105          |
| hsa-miR-4326     | 12.597            | 13.406          | 12.588           | 12.241         | 13.028          |
| hsa-miR-3180-5p  | 13.414            | 17.909          | 15.514           | 17.206         | 15.952          |
| hsa-miR-363-5p   | 8.636             | 8.915           | 8.579            | 8.888          | 8.785           |
| hsa-miR-1270     | 11.285            | 13.058          | 11.664           | 11.709         | 12.134          |
| hsa-miR-524-3p   | 8.159             | 8.007           | 8.146            | 8.112          | 8.196           |
| hsa-miR-484      | 2842.786          | 4635.148        | 3362.181         | 3355.592       | 3336.336        |
| hsa-miR-1193     | 7.019             | 7.063           | 7.134            | 7.052          | 7.031           |
| hsa-miR-34a-3p   | 8.081             | 8.031           | 7.978            | 8.111          | 8.123           |

| miRNA            | median_Con | mean_LCa   | mean_NTL   | mean_OD    | mean_Con   |
|------------------|------------|------------|------------|------------|------------|
| hsa-miR-744-3p   | 10.654     | 10.318     | 10.689     | 11.102     | 10.793     |
| hsa-miR-186-3p   | 8.698      | 8.777      | 8.810      | 9.053      | 8.841      |
| hsa-miR-708-3p   | 7.530      | 7.497      | 7.420      | 7.552      | 7.535      |
| hsa-miR-1238-3p  | 23.039     | 41.778     | 30.448     | 41.014     | 37.990     |
| hsa-miR-3180     | 6.922      | 7.012      | 7.058      | 6.992      | 6.950      |
| hsa-miR-1298-5p  | 7.181      | 7.250      | 7.304      | 7.241      | 7.203      |
| hsa-miR-499a-5p  | 8.445      | 8.404      | 8.504      | 8.615      | 8.541      |
| hsa-miR-647      | 8.182      | 8.179      | 8.411      | 8.233      | 8.256      |
| hsa-miR-3622b-5p | 7.700      | 8.073      | 8.108      | 7.945      | 7.835      |
| hsa-miR-556-3p   | 9.425      | 9.813      | 9.468      | 10.092     | 10.030     |
| hsa-miR-3614-5p  | 15.455     | 20.625     | 18.241     | 20.468     | 18.829     |
| hsa-miR-3136-5p  | 8.175      | 8.291      | 8.311      | 8.136      | 8.206      |
| hsa-let-7e-3p    | 8.391      | 8.227      | 8.432      | 8.752      | 8.668      |
| hsa-miR-607      | 8.439      | 8.576      | 8.385      | 8.649      | 8.564      |
| hsa-miR-501-3p   | 62.300     | 74.416     | 61.155     | 65.217     | 65.451     |
| hsa-miR-4290     | 9.371      | 10.215     | 11.450     | 12.083     | 11.029     |
| hsa-miR-129-5p   | 7.851      | 7.822      | 7.981      | 7.940      | 7.894      |
| hsa-miR-451a     | 232198.514 | 221730.775 | 231794.807 | 227589.494 | 230211.809 |
| hsa-miR-1914-5p  | 8.248      | 8.135      | 8.330      | 8.243      | 8.310      |
| hsa-miR-191-3p   | 20.573     | 35.379     | 27.348     | 36.146     | 33.020     |
| hsa-miR-634      | 12.242     | 14.620     | 13.336     | 15.135     | 14.115     |
| hsa-miR-1226-3p  | 7.720      | 7.699      | 7.580      | 7.694      | 7.771      |
| hsa-miR-425-3p   | 21.943     | 33.367     | 27.091     | 33.010     | 31.204     |
| hsa-miR-3615     | 9.780      | 10.166     | 9.569      | 9.682      | 9.938      |
| hsa-miR-4310     | 17.199     | 25.569     | 21.467     | 26.253     | 23.976     |
| hsa-miR-339-5p   | 34.940     | 37.864     | 45.594     | 37.906     | 40.749     |
| hsa-miR-526b-5p  | 7.934      | 8.743      | 8.131      | 8.031      | 7.963      |
| hsa-miR-518a-3p  | 8.462      | 8.323      | 8.380      | 8.581      | 8.630      |
| hsa-miR-3144-5p  | 7.366      | 7.396      | 7.293      | 7.435      | 7.391      |
| hsa-miR-642a-5p  | 8.160      | 8.148      | 8.050      | 8.214      | 8.189      |
| hsa-miR-586      | 8.244      | 8.293      | 8.132      | 8.249      | 8.348      |
| hsa-miR-105-3p   | 7.721      | 7.916      | 7.796      | 7.810      | 7.751      |
| hsa-miR-1204     | 8.254      | 8.109      | 8.137      | 8.502      | 8.330      |
| hsa-miR-514a-3p  | 7.675      | 7.809      | 7.709      | 7.748      | 7.693      |
| hsa-miR-3182     | 7.770      | 7.893      | 7.916      | 7.788      | 7.791      |
| hsa-miR-3671     | 7.822      | 7.870      | 7.908      | 7.997      | 7.851      |
| hsa-miR-487a-3p  | 8.101      | 8.175      | 8.471      | 8.513      | 8.623      |
| hsa-miR-298      | 7.519      | 7.477      | 7.652      | 7.559      | 7.534      |

| <b>miRNA</b>     | <b>median_Con</b> | <b>mean_LCa</b> | <b>mean_NTL</b> | <b>mean_OD</b> | <b>mean_Con</b> |
|------------------|-------------------|-----------------|-----------------|----------------|-----------------|
| hsa-miR-3131     | 7.154             | 10.111          | 7.645           | 7.364          | 7.212           |
| hsa-miR-4278     | 7.101             | 7.073           | 7.184           | 7.067          | 7.142           |
| hsa-miR-7-2-3p   | 8.569             | 8.545           | 8.695           | 8.818          | 8.721           |
| hsa-miR-593-3p   | 7.981             | 7.949           | 8.139           | 8.046          | 8.031           |
| hsa-miR-558      | 7.754             | 7.779           | 7.718           | 7.850          | 7.789           |
| hsa-miR-3065-3p  | 7.684             | 7.722           | 7.660           | 7.776          | 7.712           |
| hsa-miR-541-5p   | 7.739             | 7.648           | 7.796           | 7.679          | 7.748           |
| hsa-miR-154-5p   | 15.367            | 16.010          | 18.707          | 17.533         | 17.339          |
| hsa-miR-3683     | 7.739             | 7.768           | 7.711           | 7.867          | 7.783           |
| hsa-miR-369-3p   | 8.754             | 9.014           | 8.766           | 9.086          | 8.945           |
| hsa-miR-508-3p   | 7.672             | 7.801           | 7.775           | 7.768          | 7.691           |
| hsa-miR-198      | 7.136             | 10.521          | 7.515           | 7.466          | 7.241           |
| hsa-miR-485-5p   | 7.713             | 7.846           | 7.739           | 7.703          | 7.736           |
| hsa-miR-3163     | 16.635            | 15.565          | 15.220          | 16.338         | 16.918          |
| hsa-miR-3919     | 7.348             | 7.462           | 7.389           | 7.462          | 7.368           |
| hsa-miR-4283     | 7.122             | 7.169           | 7.253           | 7.187          | 7.142           |
| hsa-miR-27a-5p   | 7.287             | 7.330           | 7.260           | 7.382          | 7.322           |
| hsa-miR-3173-3p  | 7.889             | 8.034           | 7.918           | 7.880          | 8.018           |
| hsa-miR-3196     | 37.514            | 120.947         | 47.123          | 63.063         | 57.808          |
| hsa-miR-500a-5p  | 53.570            | 58.002          | 48.827          | 56.092         | 57.935          |
| hsa-miR-520a-5p  | 7.617             | 7.766           | 7.695           | 7.668          | 7.635           |
| hsa-miR-1254     | 7.689             | 7.998           | 8.144           | 7.789          | 7.770           |
| hsa-miR-4311     | 7.241             | 7.492           | 7.302           | 7.407          | 7.317           |
| hsa-miR-891b     | 8.462             | 8.474           | 8.391           | 8.566          | 8.554           |
| hsa-miR-3150a-3p | 7.242             | 7.297           | 7.341           | 7.244          | 7.262           |
| hsa-miR-99b-3p   | 8.024             | 8.265           | 9.049           | 8.445          | 8.222           |
| hsa-miR-3200-3p  | 32.202            | 29.957          | 32.881          | 32.142         | 34.090          |
| hsa-miR-1827     | 7.649             | 7.821           | 8.017           | 7.927          | 7.812           |
| hsa-miR-941      | 6.676             | 6.800           | 6.710           | 6.727          | 6.719           |
| hsa-miR-599      | 7.883             | 7.924           | 7.822           | 7.965          | 7.901           |
| hsa-miR-493-5p   | 8.795             | 8.928           | 9.324           | 9.343          | 9.169           |
| hsa-miR-3151-5p  | 7.254             | 7.347           | 7.430           | 7.362          | 7.296           |
| hsa-miR-34b-3p   | 9.371             | 10.630          | 13.385          | 10.111         | 10.792          |
| hsa-miR-3943     | 8.366             | 8.261           | 8.499           | 8.408          | 8.425           |
| hsa-miR-644a     | 7.541             | 7.545           | 7.646           | 7.538          | 7.551           |
| hsa-miR-3613-3p  | 14.537            | 17.720          | 16.161          | 19.412         | 18.285          |
| hsa-miR-222-5p   | 7.592             | 7.528           | 7.496           | 7.589          | 7.600           |
| hsa-miR-372-3p   | 7.772             | 7.763           | 7.813           | 7.874          | 7.792           |

| miRNA            | median_Con | mean_LCa  | mean_NTL  | mean_OD   | mean_Con  |
|------------------|------------|-----------|-----------|-----------|-----------|
| hsa-miR-891a-5p  | 7.695      | 7.639     | 7.611     | 7.716     | 7.731     |
| hsa-miR-3915     | 7.700      | 7.895     | 7.816     | 7.856     | 7.752     |
| hsa-miR-662      | 8.248      | 8.676     | 8.640     | 8.428     | 8.335     |
| hsa-miR-614      | 7.822      | 7.802     | 7.937     | 7.797     | 7.840     |
| hsa-miR-223-5p   | 9.780      | 11.022    | 10.620    | 11.368    | 10.517    |
| hsa-miR-615-3p   | 8.437      | 8.450     | 8.917     | 9.085     | 8.856     |
| hsa-miR-569      | 7.655      | 7.805     | 7.700     | 7.849     | 7.729     |
| hsa-miR-936      | 8.208      | 8.873     | 8.351     | 8.575     | 8.568     |
| hsa-miR-339-3p   | 17.442     | 20.354    | 19.427    | 17.603    | 18.381    |
| hsa-miR-25-3p    | 41952.033  | 51124.276 | 44289.014 | 49861.937 | 48724.691 |
| hsa-miR-510-5p   | 7.308      | 7.329     | 7.366     | 7.411     | 7.324     |
| hsa-miR-2116-3p  | 17.024     | 24.367    | 21.218    | 23.387    | 23.282    |
| hsa-miR-942-5p   | 138.532    | 159.995   | 121.518   | 163.508   | 150.263   |
| hsa-miR-937-3p   | 8.751      | 8.747     | 10.174    | 11.417    | 9.632     |
| hsa-miR-1203     | 7.717      | 7.871     | 7.872     | 7.782     | 7.758     |
| hsa-miR-655-3p   | 8.548      | 8.402     | 8.531     | 8.613     | 8.632     |
| hsa-miR-4256     | 7.417      | 7.522     | 7.426     | 7.445     | 7.425     |
| hsa-miR-99a-3p   | 7.764      | 7.674     | 7.812     | 7.769     | 7.781     |
| hsa-miR-1278     | 8.761      | 8.888     | 8.748     | 9.002     | 8.930     |
| hsa-miR-3923     | 8.437      | 8.683     | 8.399     | 8.536     | 8.593     |
| hsa-miR-92a-2-5p | 8.060      | 8.070     | 7.962     | 8.067     | 8.131     |
| hsa-miR-3621     | 7.595      | 7.717     | 7.624     | 7.852     | 7.666     |
| hsa-miR-4300     | 7.433      | 7.515     | 7.576     | 7.525     | 7.462     |
| hsa-miR-548w     | 8.104      | 8.028     | 8.299     | 8.194     | 8.262     |
| hsa-miR-574-5p   | 63.548     | 267.986   | 123.324   | 141.904   | 159.551   |
| hsa-miR-383-5p   | 7.496      | 7.571     | 7.523     | 7.644     | 7.527     |
| hsa-miR-146b-3p  | 7.520      | 7.440     | 7.546     | 7.575     | 7.539     |
| hsa-miR-433-3p   | 7.824      | 8.172     | 8.136     | 7.924     | 8.010     |
| hsa-miR-421      | 12.985     | 12.384    | 12.486    | 12.895    | 13.142    |
| hsa-miR-576-3p   | 7.681      | 7.867     | 7.659     | 7.837     | 7.749     |
| hsa-miR-550a-5p  | 17.442     | 23.633    | 20.676    | 23.060    | 21.898    |
| hsa-miR-548l     | 7.555      | 7.525     | 7.651     | 7.547     | 7.572     |
| hsa-miR-1250-5p  | 7.728      | 7.772     | 7.875     | 7.814     | 7.755     |
| hsa-miR-3667-5p  | 26.040     | 51.123    | 37.149    | 31.454    | 33.588    |
| hsa-miR-135a-5p  | 9.315      | 9.633     | 9.500     | 10.181    | 10.048    |
| hsa-miR-3183     | 6.861      | 7.186     | 6.896     | 6.907     | 6.923     |
| hsa-miR-4267     | 7.145      | 7.207     | 7.252     | 7.164     | 7.165     |
| hsa-miR-4304     | 7.737      | 8.321     | 7.987     | 7.854     | 7.789     |

| <b>miRNA</b>     | <b>median_Con</b> | <b>mean_LCa</b> | <b>mean_NTL</b> | <b>mean_OD</b> | <b>mean_Con</b> |
|------------------|-------------------|-----------------|-----------------|----------------|-----------------|
| hsa-miR-500b-5p  | 44.398            | 50.859          | 47.847          | 41.181         | 43.724          |
| hsa-miR-4317     | 20.756            | 23.057          | 21.753          | 24.502         | 21.838          |
| hsa-miR-455-5p   | 7.983             | 7.901           | 8.049           | 7.975          | 8.033           |
| hsa-miR-92b-5p   | 6.940             | 7.081           | 7.023           | 7.097          | 6.995           |
| hsa-miR-885-3p   | 6.931             | 7.000           | 6.976           | 7.067          | 6.960           |
| hsa-miR-4262     | 7.727             | 7.742           | 7.741           | 7.838          | 7.764           |
| hsa-miR-4301     | 8.349             | 8.313           | 8.258           | 8.385          | 8.411           |
| hsa-miR-296-3p   | 6.986             | 7.068           | 7.116           | 7.038          | 7.023           |
| hsa-miR-215-5p   | 1454.212          | 1378.374        | 1602.935        | 1582.246       | 1487.416        |
| hsa-miR-3681-5p  | 7.220             | 7.235           | 7.206           | 7.141          | 7.232           |
| hsa-miR-636      | 11.060            | 13.010          | 12.626          | 12.301         | 12.407          |
| hsa-miR-1279     | 8.736             | 8.733           | 8.646           | 8.850          | 8.879           |
| hsa-miR-597-5p   | 7.567             | 7.521           | 7.641           | 7.539          | 7.596           |
| hsa-miR-877-5p   | 7.516             | 9.508           | 7.493           | 7.568          | 7.558           |
| hsa-miR-4315     | 7.942             | 8.117           | 8.033           | 8.050          | 7.981           |
| hsa-miR-508-5p   | 7.277             | 7.240           | 7.356           | 7.285          | 7.281           |
| hsa-miR-616-3p   | 6.989             | 7.138           | 7.042           | 7.119          | 7.044           |
| hsa-miR-134-5p   | 16.527            | 50.946          | 16.455          | 18.388         | 18.589          |
| hsa-miR-411-5p   | 7.864             | 7.794           | 7.736           | 7.823          | 7.858           |
| hsa-miR-509-3-5p | 7.612             | 7.764           | 7.687           | 7.727          | 7.650           |
| hsa-miR-549a     | 7.941             | 7.928           | 7.840           | 7.957          | 7.957           |
| hsa-miR-518e-3p  | 7.962             | 7.895           | 8.003           | 7.899          | 7.987           |
| hsa-miR-512-5p   | 7.898             | 7.797           | 7.782           | 7.863          | 7.899           |
| hsa-miR-661      | 7.761             | 7.665           | 7.732           | 7.674          | 7.757           |
| hsa-miR-1299     | 9.469             | 15.320          | 12.224          | 12.509         | 13.109          |
| hsa-miR-515-3p   | 8.987             | 9.108           | 9.176           | 9.593          | 9.535           |
| hsa-miR-1287-5p  | 9.279             | 10.661          | 9.992           | 9.490          | 9.650           |
| hsa-miR-3666     | 7.517             | 7.622           | 7.647           | 7.635          | 7.529           |
| hsa-miR-593-5p   | 7.248             | 7.207           | 7.173           | 7.227          | 7.269           |
| hsa-miR-105-5p   | 7.689             | 7.640           | 7.764           | 7.724          | 7.715           |
| hsa-miR-409-5p   | 10.149            | 10.249          | 10.232          | 10.500         | 10.820          |
| hsa-miR-200b-5p  | 7.154             | 7.255           | 7.308           | 7.224          | 7.179           |
| hsa-miR-1468-5p  | 7.446             | 7.357           | 7.403           | 7.427          | 7.462           |
| hsa-miR-548k     | 8.185             | 8.100           | 8.214           | 8.234          | 8.193           |
| hsa-miR-187-5p   | 7.241             | 10.136          | 7.114           | 7.233          | 7.275           |
| hsa-miR-938      | 7.084             | 7.249           | 7.202           | 7.201          | 7.123           |
| hsa-miR-1913     | 7.908             | 7.988           | 8.092           | 7.883          | 7.990           |
| hsa-miR-511-5p   | 7.835             | 7.979           | 7.942           | 7.916          | 7.857           |

| <b>miRNA</b>    | <b>median_Con</b> | <b>mean_LCa</b> | <b>mean_NTL</b> | <b>mean_OD</b> | <b>mean_Con</b> |
|-----------------|-------------------|-----------------|-----------------|----------------|-----------------|
| hsa-miR-1273a   | 8.027             | 8.207           | 8.139           | 8.163          | 8.070           |
| hsa-miR-4303    | 7.413             | 7.538           | 7.447           | 7.471          | 7.440           |
| hsa-miR-4260    | 7.403             | 7.563           | 7.580           | 7.482          | 7.447           |
| hsa-miR-376a-5p | 10.365            | 10.661          | 11.737          | 11.451         | 11.318          |
| hsa-miR-217     | 6.979             | 7.062           | 7.017           | 7.061          | 6.983           |
| hsa-miR-181a-3p | 17.199            | 17.916          | 20.143          | 18.106         | 17.933          |
| hsa-miR-939-5p  | 49.921            | 66.039          | 77.526          | 67.392         | 65.489          |
| hsa-miR-1200    | 7.685             | 7.625           | 7.647           | 7.604          | 7.705           |
| hsa-miR-345-5p  | 10.003            | 9.939           | 10.397          | 10.483         | 9.988           |
| hsa-miR-3678-3p | 7.171             | 7.146           | 7.241           | 7.220          | 7.173           |
| hsa-miR-99a-5p  | 66.151            | 72.963          | 59.862          | 76.056         | 72.572          |
| hsa-miR-544b    | 7.999             | 8.092           | 8.027           | 8.128          | 8.019           |
| hsa-miR-516a-5p | 8.352             | 8.631           | 8.376           | 8.433          | 8.451           |
| hsa-miR-133b    | 26.486            | 37.685          | 29.309          | 34.180         | 34.208          |
| hsa-miR-3927-3p | 7.874             | 7.989           | 7.847           | 7.956          | 7.931           |
| hsa-miR-412-3p  | 7.423             | 7.411           | 7.510           | 7.419          | 7.441           |
| hsa-miR-1292-5p | 7.801             | 7.759           | 7.730           | 7.880          | 7.798           |
| hsa-miR-10a-3p  | 7.544             | 7.625           | 7.510           | 7.612          | 7.574           |
| hsa-miR-2117    | 7.628             | 7.693           | 7.725           | 7.634          | 7.646           |
| hsa-miR-328-3p  | 32.202            | 50.084          | 41.840          | 52.707         | 50.251          |
| hsa-miR-3908    | 7.821             | 7.947           | 7.797           | 7.895          | 7.880           |
| hsa-miR-3120-3p | 9.310             | 9.895           | 9.518           | 10.010         | 9.720           |
| hsa-miR-4285    | 7.208             | 7.316           | 7.246           | 7.277          | 7.215           |
| hsa-miR-3160-3p | 7.425             | 7.463           | 7.553           | 7.496          | 7.447           |
| hsa-miR-3663-5p | 7.459             | 7.609           | 7.704           | 7.633          | 7.562           |
| hsa-miR-759     | 7.652             | 7.728           | 7.646           | 7.729          | 7.669           |
| hsa-miR-194-5p  | 1391.284          | 1534.633        | 1409.662        | 1690.041       | 1495.182        |
| hsa-miR-125b-5p | 285.644           | 475.318         | 335.639         | 354.845        | 383.270         |
| hsa-miR-3192-5p | 7.313             | 7.373           | 7.423           | 7.453          | 7.347           |
| hsa-miR-367-5p  | 8.512             | 8.642           | 8.436           | 8.511          | 8.567           |
| hsa-miR-190b    | 8.320             | 8.429           | 8.268           | 8.555          | 8.497           |
| hsa-miR-579-3p  | 8.098             | 8.058           | 8.109           | 8.194          | 8.127           |
| hsa-miR-3199    | 7.713             | 7.855           | 7.827           | 7.832          | 7.740           |
| hsa-miR-889-3p  | 8.223             | 8.160           | 8.152           | 8.268          | 8.256           |
| hsa-miR-623     | 8.417             | 10.431          | 8.787           | 9.358          | 9.361           |
| hsa-miR-496     | 8.229             | 8.174           | 8.238           | 8.316          | 8.273           |
| hsa-miR-3185    | 7.372             | 7.320           | 7.375           | 7.422          | 7.406           |
| hsa-miR-1197    | 8.138             | 8.028           | 8.089           | 8.112          | 8.150           |

| <b>miRNA</b>     | <b>median_Con</b> | <b>mean_LCa</b> | <b>mean_NTL</b> | <b>mean_OD</b> | <b>mean_Con</b> |
|------------------|-------------------|-----------------|-----------------|----------------|-----------------|
| hsa-miR-211-5p   | 11.482            | 12.013          | 11.916          | 14.987         | 13.186          |
| hsa-miR-767-3p   | 10.419            | 11.914          | 11.235          | 12.129         | 11.643          |
| hsa-miR-591      | 7.876             | 7.769           | 7.919           | 7.922          | 7.882           |
| hsa-miR-2278     | 8.027             | 8.476           | 8.367           | 8.097          | 8.208           |
| hsa-miR-624-3p   | 8.190             | 8.157           | 8.155           | 8.357          | 8.233           |
| hsa-miR-4277     | 7.725             | 7.658           | 7.675           | 7.735          | 7.748           |
| hsa-miR-1911-5p  | 7.617             | 7.552           | 7.636           | 7.638          | 7.628           |
| hsa-miR-346      | 8.801             | 8.903           | 9.164           | 8.892          | 9.106           |
| hsa-miR-216a-5p  | 7.220             | 7.288           | 7.290           | 7.321          | 7.236           |
| hsa-miR-517-5p   | 7.651             | 7.689           | 7.732           | 7.752          | 7.675           |
| hsa-miR-3684     | 8.006             | 7.880           | 7.960           | 8.147          | 8.072           |
| hsa-miR-4261     | 12.597            | 13.818          | 15.502          | 12.842         | 13.663          |
| hsa-miR-490-3p   | 7.583             | 7.724           | 7.629           | 7.629          | 7.606           |
| hsa-miR-196a-3p  | 7.574             | 7.803           | 7.657           | 7.764          | 7.658           |
| hsa-miR-1825     | 20.048            | 34.956          | 30.563          | 37.403         | 33.618          |
| hsa-miR-1469     | 7.775             | 8.663           | 8.194           | 8.478          | 7.950           |
| hsa-miR-3174     | 8.057             | 8.258           | 8.197           | 8.104          | 8.122           |
| hsa-miR-944      | 7.960             | 8.045           | 7.917           | 8.034          | 8.002           |
| hsa-miR-29b-1-5p | 11.606            | 13.363          | 13.549          | 13.564         | 12.570          |
| hsa-miR-488-5p   | 8.303             | 8.393           | 8.342           | 8.466          | 8.350           |
| hsa-miR-302d-5p  | 6.931             | 6.969           | 7.017           | 6.986          | 6.940           |
| hsa-miR-3142     | 7.770             | 7.861           | 7.811           | 7.782          | 7.754           |
| hsa-miR-718      | 7.871             | 18.891          | 8.495           | 8.573          | 7.967           |
| hsa-miR-3680-3p  | 8.316             | 8.452           | 8.370           | 8.574          | 8.358           |
| hsa-miR-1265     | 7.833             | 7.787           | 7.918           | 7.943          | 7.902           |
| hsa-miR-3681-3p  | 8.525             | 8.539           | 8.761           | 8.635          | 8.621           |
| hsa-miR-214-5p   | 7.974             | 7.868           | 7.907           | 7.900          | 7.971           |
| hsa-miR-548t-5p  | 8.025             | 7.938           | 8.094           | 8.110          | 8.124           |
| hsa-miR-1539     | 17.816            | 26.035          | 21.983          | 26.673         | 25.332          |
| hsa-miR-202-5p   | 9.196             | 9.368           | 9.299           | 9.634          | 9.577           |
| hsa-miR-519e-3p  | 8.937             | 9.140           | 9.071           | 9.461          | 9.485           |
| hsa-miR-4276     | 7.435             | 7.423           | 7.378           | 7.451          | 7.457           |
| hsa-miR-3153     | 7.254             | 7.332           | 7.359           | 7.319          | 7.274           |
| hsa-miR-3187-3p  | 6.954             | 6.978           | 6.906           | 7.001          | 6.988           |
| hsa-miR-555      | 7.706             | 7.830           | 7.805           | 7.806          | 7.726           |
| hsa-miR-4266     | 6.994             | 6.998           | 7.058           | 6.979          | 6.994           |
| hsa-miR-627-5p   | 71.701            | 55.622          | 66.950          | 62.888         | 68.050          |
| hsa-miR-585-3p   | 7.812             | 7.725           | 7.819           | 7.823          | 7.835           |



| <b>miRNA</b>     | <b>median_Con</b> | <b>mean_LCa</b> | <b>mean_NTL</b> | <b>mean_OD</b> | <b>mean_Con</b> |
|------------------|-------------------|-----------------|-----------------|----------------|-----------------|
| hsa-miR-1293     | 7.443             | 7.541           | 7.540           | 7.533          | 7.461           |
| hsa-miR-34b-5p   | 9.196             | 10.236          | 9.706           | 10.297         | 9.481           |
| hsa-miR-200c-5p  | 7.847             | 7.863           | 7.964           | 7.932          | 7.872           |
| hsa-miR-370-3p   | 8.105             | 8.668           | 9.327           | 9.036          | 8.291           |
| hsa-miR-588      | 7.758             | 7.740           | 7.754           | 7.858          | 7.798           |
| hsa-miR-3149     | 9.807             | 13.292          | 11.990          | 11.276         | 11.542          |
| hsa-miR-513c-5p  | 9.413             | 10.488          | 10.666          | 10.218         | 10.078          |
| hsa-miR-1915-5p  | 7.404             | 8.600           | 7.442           | 7.351          | 7.422           |
| hsa-miR-517a-3p  | 8.277             | 8.264           | 8.371           | 8.548          | 8.499           |
| hsa-miR-1227-3p  | 10.815            | 12.380          | 11.756          | 13.135         | 12.469          |
| hsa-miR-1912     | 7.112             | 7.185           | 7.142           | 7.198          | 7.134           |
| hsa-miR-513b-5p  | 12.007            | 14.934          | 15.857          | 13.823         | 14.017          |
| hsa-miR-18b-3p   | 10.069            | 12.135          | 10.705          | 11.237         | 10.959          |
| hsa-miR-548x-3p  | 8.801             | 8.995           | 9.055           | 9.129          | 9.372           |
| hsa-miR-3678-5p  | 7.911             | 7.927           | 7.876           | 7.987          | 7.932           |
| hsa-miR-4275     | 8.508             | 8.434           | 8.495           | 8.560          | 8.629           |
| hsa-miR-185-3p   | 8.121             | 8.098           | 8.261           | 8.260          | 8.179           |
| hsa-miR-3166     | 7.968             | 7.885           | 7.924           | 7.965          | 7.983           |
| hsa-miR-1184     | 7.800             | 7.716           | 7.849           | 7.823          | 7.815           |
| hsa-miR-374b-3p  | 8.469             | 8.632           | 8.445           | 8.619          | 8.577           |
| hsa-miR-3148     | 8.366             | 9.257           | 9.053           | 8.641          | 8.795           |
| hsa-miR-4308     | 8.283             | 8.195           | 8.279           | 8.317          | 8.344           |
| hsa-miR-548h-5p  | 7.679             | 7.649           | 7.784           | 7.696          | 7.707           |
| hsa-miR-3139     | 7.584             | 7.658           | 7.674           | 7.621          | 7.593           |
| hsa-miR-340-3p   | 132.276           | 166.611         | 186.080         | 200.704        | 161.029         |
| hsa-miR-19a-5p   | 8.069             | 8.223           | 8.164           | 8.137          | 8.107           |
| hsa-miR-449c-5p  | 7.485             | 7.372           | 7.449           | 7.424          | 7.475           |
| hsa-miR-4292     | 7.023             | 6.995           | 7.078           | 6.994          | 7.050           |
| hsa-miR-1205     | 7.301             | 7.272           | 7.279           | 7.357          | 7.316           |
| hsa-miR-19b-2-5p | 8.604             | 8.789           | 8.599           | 8.725          | 8.813           |
| hsa-miR-548b-3p  | 8.431             | 8.365           | 8.505           | 8.644          | 8.652           |
| hsa-miR-3614-3p  | 8.373             | 8.370           | 8.529           | 8.502          | 8.471           |
| hsa-miR-376b-3p  | 7.898             | 8.082           | 8.036           | 8.110          | 7.991           |
| hsa-miR-3144-3p  | 8.292             | 8.198           | 8.296           | 8.369          | 8.393           |
| hsa-miR-543      | 15.021            | 17.125          | 15.487          | 16.912         | 16.954          |
| hsa-miR-30c-2-3p | 8.196             | 8.455           | 8.306           | 8.300          | 8.228           |
| hsa-miR-516a-3p  | 7.734             | 7.785           | 7.651           | 7.751          | 7.722           |
| hsa-miR-631      | 8.644             | 11.302          | 10.575          | 10.168         | 10.298          |

| <b>miRNA</b>     | <b>median_Con</b> | <b>mean_LCa</b> | <b>mean_NTL</b> | <b>mean_OD</b> | <b>mean_Con</b> |
|------------------|-------------------|-----------------|-----------------|----------------|-----------------|
| hsa-miR-1224-3p  | 8.175             | 8.053           | 8.188           | 8.200          | 8.271           |
| hsa-miR-1244     | 7.932             | 7.995           | 8.136           | 8.176          | 8.022           |
| hsa-miR-518c-5p  | 7.689             | 7.787           | 7.805           | 7.768          | 7.700           |
| hsa-miR-548d-5p  | 9.843             | 13.282          | 11.024          | 11.806         | 13.118          |
| hsa-miR-3690     | 7.564             | 7.770           | 7.611           | 7.758          | 7.695           |
| hsa-miR-873-5p   | 8.212             | 8.139           | 8.214           | 8.171          | 8.251           |
| hsa-miR-1291     | 8.538             | 9.942           | 9.946           | 10.360         | 9.566           |
| hsa-miR-221-3p   | 79.299            | 81.191          | 79.955          | 84.320         | 91.832          |
| hsa-miR-4287     | 7.840             | 7.796           | 7.895           | 7.863          | 7.860           |
| hsa-miR-3162-5p  | 167.063           | 348.848         | 246.906         | 243.002        | 236.749         |
| hsa-miR-3692-3p  | 7.242             | 7.306           | 7.229           | 7.262          | 7.255           |
| hsa-miR-3177-3p  | 7.829             | 8.013           | 7.943           | 7.915          | 7.879           |
| hsa-miR-4297     | 8.135             | 8.100           | 8.926           | 9.636          | 8.379           |
| hsa-miR-3613-5p  | 8.848             | 9.298           | 9.065           | 9.461          | 9.551           |
| hsa-miR-548a-3p  | 8.205             | 8.099           | 8.213           | 8.176          | 8.222           |
| hsa-miR-635      | 7.845             | 7.938           | 7.950           | 7.981          | 7.880           |
| hsa-miR-1228-5p  | 7.154             | 7.729           | 7.504           | 7.402          | 7.469           |
| hsa-miR-331-5p   | 7.468             | 7.576           | 7.541           | 7.469          | 7.505           |
| hsa-miR-1266-5p  | 7.211             | 7.269           | 7.223           | 7.287          | 7.230           |
| hsa-miR-96-3p    | 7.287             | 7.318           | 7.276           | 7.355          | 7.302           |
| hsa-miR-888-3p   | 7.802             | 7.811           | 7.773           | 7.859          | 7.838           |
| hsa-miR-548y     | 8.828             | 8.922           | 9.205           | 9.458          | 9.292           |
| hsa-miR-34c-5p   | 7.896             | 7.941           | 7.847           | 7.932          | 7.957           |
| hsa-miR-367-3p   | 8.295             | 8.456           | 8.319           | 8.430          | 8.363           |
| hsa-miR-23c      | 15.193            | 21.804          | 19.176          | 23.517         | 21.516          |
| hsa-miR-432-5p   | 10.014            | 10.276          | 10.429          | 10.350         | 10.701          |
| hsa-miR-548f-3p  | 8.980             | 9.734           | 10.332          | 9.348          | 10.249          |
| hsa-miR-3622b-3p | 7.907             | 7.930           | 8.018           | 8.059          | 8.172           |
| hsa-miR-567      | 7.765             | 7.784           | 7.728           | 7.823          | 7.799           |
| hsa-miR-541-3p   | 7.482             | 7.575           | 7.481           | 7.551          | 7.514           |
| hsa-miR-520e     | 8.675             | 8.912           | 8.795           | 8.953          | 9.055           |
| hsa-miR-764      | 8.667             | 8.714           | 9.104           | 9.945          | 9.138           |
| hsa-miR-570-3p   | 8.585             | 8.566           | 8.675           | 8.745          | 8.728           |
| hsa-miR-432-3p   | 8.229             | 8.174           | 8.368           | 8.425          | 8.280           |
| hsa-miR-302b-5p  | 8.094             | 8.109           | 8.052           | 8.176          | 8.133           |
| hsa-miR-3186-5p  | 7.941             | 7.888           | 7.984           | 8.001          | 7.965           |
| hsa-miR-1303     | 8.247             | 8.359           | 8.461           | 8.290          | 8.369           |
| hsa-miR-218-2-3p | 7.489             | 7.435           | 7.478           | 7.494          | 7.549           |

| <b>miRNA</b>     | <b>median_Con</b> | <b>mean_LCa</b> | <b>mean_NTLD</b> | <b>mean_OD</b> | <b>mean_Con</b> |
|------------------|-------------------|-----------------|------------------|----------------|-----------------|
| hsa-miR-192-5p   | 2528.247          | 2505.247        | 2719.623         | 2737.864       | 2818.788        |
| hsa-miR-486-5p   | 152399.215        | 154738.591      | 145285.295       | 152846.903     | 153205.225      |
| hsa-miR-3689a-5p | 7.917             | 7.865           | 7.919            | 7.952          | 7.936           |
| hsa-miR-4316     | 7.201             | 7.283           | 7.290            | 7.304          | 7.238           |
| hsa-miR-676-3p   | 7.635             | 7.718           | 7.671            | 7.692          | 7.636           |
| hsa-miR-664a-3p  | 209.704           | 229.688         | 203.486          | 210.325        | 220.258         |
| hsa-miR-1236-3p  | 8.391             | 8.367           | 8.439            | 8.526          | 8.616           |
| hsa-miR-522-3p   | 8.590             | 8.607           | 8.595            | 8.769          | 8.751           |
| hsa-miR-23b-5p   | 8.606             | 8.749           | 8.598            | 8.623          | 8.680           |
| hsa-let-7f-1-3p  | 16.114            | 23.994          | 21.229           | 26.910         | 23.753          |
| hsa-miR-518f-5p  | 7.687             | 7.633           | 7.711            | 7.680          | 7.703           |
| hsa-miR-146a-3p  | 8.288             | 8.494           | 8.383            | 8.464          | 8.373           |
| hsa-miR-3689a-3p | 7.582             | 7.564           | 7.679            | 7.660          | 7.632           |
| hsa-miR-4302     | 7.381             | 7.370           | 7.320            | 7.383          | 7.393           |
| hsa-miR-299-5p   | 15.108            | 15.165          | 18.610           | 16.613         | 16.514          |
| hsa-miR-612      | 8.008             | 8.001           | 8.050            | 7.949          | 7.997           |
| hsa-miR-514b-3p  | 7.539             | 7.493           | 7.574            | 7.533          | 7.542           |
| hsa-miR-3612     | 7.250             | 7.300           | 7.241            | 7.325          | 7.278           |
| hsa-miR-3942-5p  | 8.231             | 8.242           | 8.173            | 8.282          | 8.266           |
| hsa-miR-1323     | 8.642             | 8.708           | 8.652            | 8.696          | 8.811           |
| hsa-miR-548v     | 8.826             | 8.940           | 9.873            | 8.951          | 9.001           |
| hsa-miR-4265     | 7.571             | 7.572           | 7.584            | 7.619          | 7.663           |
| hsa-miR-3129-5p  | 7.785             | 7.829           | 7.899            | 7.954          | 7.857           |
| hsa-miR-876-5p   | 8.708             | 9.014           | 9.029            | 8.970          | 8.862           |
| hsa-miR-149-5p   | 15.918            | 23.879          | 20.233           | 25.092         | 23.552          |
| hsa-miR-1258     | 7.281             | 7.303           | 7.353            | 7.361          | 7.291           |
| hsa-miR-548m     | 8.598             | 8.683           | 8.937            | 9.063          | 8.900           |
| hsa-miR-302a-3p  | 8.782             | 9.046           | 9.041            | 9.434          | 9.349           |
| hsa-miR-185-5p   | 17426.344         | 17659.135       | 15105.378        | 17009.533      | 16616.984       |
| hsa-let-7b-3p    | 17.442            | 26.184          | 25.186           | 33.440         | 26.123          |
| hsa-miR-548n     | 8.581             | 8.831           | 8.743            | 8.909          | 9.032           |
| hsa-miR-323a-5p  | 7.103             | 7.102           | 7.172            | 7.098          | 7.115           |
| hsa-miR-548aa    | 11.482            | 13.300          | 13.370           | 12.886         | 12.880          |
| hsa-miR-4296     | 7.418             | 7.600           | 7.608            | 7.547          | 7.501           |
| hsa-miR-29a-5p   | 9.061             | 9.250           | 9.567            | 9.653          | 9.640           |
| hsa-miR-645      | 7.705             | 7.835           | 7.843            | 7.793          | 7.766           |
| hsa-miR-519b-3p  | 8.370             | 8.405           | 8.342            | 8.476          | 8.499           |
| hsa-miR-1267     | 11.134            | 13.835          | 13.093           | 14.169         | 13.779          |

| <b>miRNA</b>      | <b>median_Con</b> | <b>mean_LCa</b> | <b>mean_NTL</b> | <b>mean_OD</b> | <b>mean_Con</b> |
|-------------------|-------------------|-----------------|-----------------|----------------|-----------------|
| hsa-miR-4330      | 7.490             | 7.597           | 7.545           | 7.593          | 7.530           |
| hsa-miR-653-5p    | 8.083             | 8.210           | 8.107           | 8.137          | 8.117           |
| hsa-miR-493-3p    | 7.496             | 7.663           | 7.558           | 7.583          | 7.558           |
| hsa-miR-4288      | 7.936             | 8.011           | 8.027           | 7.982          | 7.948           |
| hsa-miR-204-5p    | 13.165            | 70.789          | 14.762          | 18.412         | 15.151          |
| hsa-miR-380-5p    | 7.408             | 7.486           | 7.485           | 7.439          | 7.420           |
| hsa-miR-3692-5p   | 7.758             | 8.035           | 7.941           | 7.922          | 7.870           |
| hsa-miR-34c-3p    | 7.622             | 7.633           | 7.712           | 7.675          | 7.619           |
| hsa-miR-200a-5p   | 7.425             | 7.483           | 7.422           | 7.404          | 7.471           |
| hsa-miR-499a-3p   | 7.667             | 7.769           | 7.684           | 7.739          | 7.699           |
| hsa-miR-449b-5p   | 8.079             | 8.047           | 8.045           | 8.064          | 8.149           |
| hsa-miR-218-1-3p  | 7.150             | 7.146           | 7.115           | 7.179          | 7.172           |
| hsa-miR-196a-5p   | 9.395             | 9.910           | 10.429          | 10.397         | 10.004          |
| hsa-miR-658       | 7.564             | 7.531           | 7.628           | 7.619          | 7.610           |
| hsa-miR-4321      | 8.098             | 8.025           | 8.049           | 8.090          | 8.149           |
| hsa-miR-125b-2-3p | 7.918             | 7.898           | 7.980           | 7.912          | 7.958           |
| hsa-miR-4295      | 8.150             | 8.277           | 8.213           | 8.234          | 8.176           |
| hsa-miR-609       | 8.458             | 8.469           | 8.726           | 8.655          | 8.631           |
| hsa-miR-199a-5p   | 204.279           | 275.332         | 241.050         | 219.895        | 216.544         |
| hsa-miR-30a-3p    | 8.215             | 14.681          | 8.860           | 8.791          | 8.560           |
| hsa-miR-1269a     | 7.278             | 7.219           | 7.271           | 7.251          | 7.278           |
| hsa-miR-582-3p    | 7.617             | 7.661           | 7.708           | 7.743          | 7.649           |
| hsa-miR-520a-3p   | 9.061             | 9.420           | 9.563           | 9.911          | 9.846           |
| hsa-miR-4263      | 7.469             | 7.444           | 7.492           | 7.436          | 7.491           |
| hsa-miR-592       | 7.907             | 8.044           | 8.018           | 8.025          | 7.952           |
| hsa-miR-206       | 7.304             | 7.512           | 7.478           | 7.471          | 7.394           |
| hsa-miR-4279      | 8.075             | 8.211           | 8.268           | 8.160          | 8.166           |
| hsa-miR-581       | 7.890             | 7.931           | 7.843           | 7.913          | 7.921           |
| hsa-miR-553       | 8.074             | 8.242           | 8.311           | 8.198          | 8.192           |
| hsa-miR-130b-5p   | 14.231            | 14.984          | 14.533          | 14.501         | 15.124          |
| hsa-miR-325       | 7.458             | 7.522           | 7.432           | 7.460          | 7.484           |
| hsa-miR-302e      | 7.953             | 7.931           | 8.018           | 8.004          | 7.963           |
| hsa-miR-663b      | 7.344             | 7.338           | 7.387           | 7.409          | 7.376           |
| hsa-miR-3169      | 7.095             | 7.099           | 7.059           | 7.124          | 7.104           |
| hsa-miR-4325      | 7.775             | 7.778           | 7.836           | 7.809          | 7.768           |
| hsa-miR-769-3p    | 8.909             | 9.311           | 9.237           | 9.073          | 9.240           |
| hsa-miR-504-5p    | 8.017             | 7.958           | 8.061           | 8.034          | 8.041           |
| hsa-miR-3620-3p   | 12.393            | 17.001          | 15.053          | 15.790         | 16.039          |

| miRNA           | median_Con | mean_LCa  | mean_NTLD | mean_OD   | mean_Con  |
|-----------------|------------|-----------|-----------|-----------|-----------|
| hsa-miR-130a-5p | 8.145      | 8.071     | 9.207     | 8.537     | 8.458     |
| hsa-miR-3181    | 6.876      | 6.967     | 6.891     | 6.863     | 6.924     |
| hsa-miR-182-3p  | 8.164      | 8.105     | 8.182     | 8.129     | 8.181     |
| hsa-miR-1185-5p | 8.229      | 8.207     | 8.262     | 8.307     | 8.317     |
| hsa-miR-3691-5p | 7.527      | 7.515     | 7.569     | 7.589     | 7.570     |
| hsa-miR-507     | 8.053      | 8.131     | 8.088     | 8.148     | 8.075     |
| hsa-miR-613     | 8.698      | 8.696     | 9.619     | 12.815    | 9.238     |
| hsa-miR-3935    | 8.990      | 11.995    | 13.416    | 11.670    | 13.547    |
| hsa-miR-520d-3p | 8.934      | 9.304     | 10.956    | 10.780    | 9.773     |
| hsa-miR-518d-3p | 8.529      | 8.614     | 8.775     | 8.631     | 8.629     |
| hsa-miR-455-3p  | 7.952      | 8.067     | 7.908     | 7.972     | 7.973     |
| hsa-miR-1470    | 11.441     | 13.292    | 13.513    | 13.416    | 13.326    |
| hsa-miR-136-3p  | 8.337      | 8.402     | 8.321     | 8.442     | 8.386     |
| hsa-miR-525-3p  | 8.303      | 8.281     | 8.325     | 8.399     | 8.366     |
| hsa-miR-767-5p  | 7.749      | 7.708     | 7.686     | 7.761     | 7.751     |
| hsa-miR-4306    | 25172.328  | 30631.569 | 25959.304 | 26069.456 | 26311.488 |
| hsa-miR-626     | 7.872      | 7.990     | 7.953     | 7.960     | 7.902     |
| hsa-miR-33a-5p  | 8.117      | 8.234     | 8.168     | 8.149     | 8.156     |
| hsa-miR-302d-3p | 8.169      | 8.157     | 8.276     | 8.242     | 8.227     |
| hsa-miR-135b-5p | 9.482      | 10.134    | 9.868     | 10.538    | 10.329    |
| hsa-let-7e-5p   | 23.391     | 40.915    | 28.887    | 27.707    | 26.512    |
| hsa-miR-3661    | 7.147      | 7.227     | 7.249     | 7.213     | 7.186     |
| hsa-miR-492     | 8.117      | 8.178     | 8.215     | 8.175     | 8.140     |
| hsa-miR-548b-5p | 8.581      | 8.670     | 8.888     | 8.904     | 8.920     |
| hsa-miR-875-5p  | 8.772      | 8.932     | 8.963     | 9.033     | 9.057     |
| hsa-miR-608     | 7.458      | 7.426     | 7.481     | 7.469     | 7.483     |
| hsa-miR-335-3p  | 12.651     | 13.433    | 23.223    | 19.799    | 14.628    |
| hsa-miR-3159    | 7.285      | 7.308     | 7.370     | 7.305     | 7.311     |
| hsa-miR-196b-3p | 7.985      | 7.948     | 8.192     | 8.485     | 8.143     |
| hsa-miR-3119    | 8.190      | 8.232     | 8.149     | 8.232     | 8.216     |
| hsa-miR-605-5p  | 8.809      | 8.920     | 9.360     | 10.914    | 9.368     |
| hsa-miR-3650    | 7.735      | 7.848     | 7.753     | 7.889     | 7.788     |
| hsa-miR-885-5p  | 11.735     | 12.568    | 31.886    | 31.087    | 15.175    |
| hsa-miR-1324    | 8.486      | 8.522     | 8.487     | 8.599     | 8.561     |
| hsa-miR-675-5p  | 6.903      | 6.918     | 6.959     | 6.921     | 6.910     |
| hsa-miR-4309    | 7.344      | 7.377     | 7.394     | 7.382     | 7.340     |
| hsa-miR-4307    | 8.934      | 9.312     | 9.560     | 9.910     | 9.772     |
| hsa-miR-302b-3p | 8.720      | 8.872     | 8.777     | 9.015     | 8.945     |

| miRNA           | median_Con | mean_LCa | mean_NTL | mean_OD | mean_Con |
|-----------------|------------|----------|----------|---------|----------|
| hsa-miR-517c-3p | 8.112      | 8.169    | 8.169    | 8.097   | 8.162    |
| hsa-miR-2277-3p | 8.119      | 8.849    | 8.581    | 8.665   | 8.810    |
| hsa-miR-3662    | 7.532      | 7.636    | 7.547    | 7.579   | 7.577    |
| hsa-miR-552-3p  | 7.650      | 7.718    | 7.725    | 7.788   | 7.715    |
| hsa-miR-3191-3p | 6.717      | 6.806    | 6.765    | 6.778   | 6.756    |
| hsa-miR-600     | 7.421      | 7.398    | 7.436    | 7.384   | 7.429    |
| hsa-miR-1294    | 8.793      | 8.842    | 9.115    | 9.186   | 9.013    |
| hsa-miR-497-3p  | 7.333      | 7.333    | 7.357    | 7.386   | 7.328    |
| hsa-miR-149-3p  | 7.385      | 7.660    | 7.504    | 7.471   | 7.466    |
| hsa-miR-548u    | 8.581      | 8.760    | 8.734    | 8.784   | 8.656    |
| hsa-miR-136-5p  | 9.550      | 9.956    | 10.248   | 10.232  | 10.295   |
| hsa-miR-521     | 8.602      | 8.739    | 9.080    | 9.987   | 9.038    |
| hsa-miR-4273    | 7.377      | 7.379    | 7.426    | 7.364   | 7.385    |
| hsa-miR-143-5p  | 8.087      | 8.074    | 8.174    | 8.188   | 8.100    |
| hsa-miR-595     | 9.058      | 11.729   | 13.801   | 14.299  | 12.100   |
| hsa-miR-490-5p  | 7.948      | 8.107    | 7.977    | 8.072   | 8.036    |
| hsa-miR-2277-5p | 7.408      | 7.504    | 7.443    | 7.446   | 7.442    |
| hsa-miR-32-3p   | 9.703      | 13.102   | 11.029   | 10.850  | 10.910   |
| hsa-miR-302a-5p | 8.052      | 8.019    | 8.043    | 8.097   | 8.078    |
| hsa-miR-449a    | 8.530      | 8.663    | 8.719    | 8.839   | 8.739    |
| hsa-miR-596     | 7.441      | 7.515    | 7.514    | 7.503   | 7.451    |
| hsa-miR-671-3p  | 9.224      | 9.730    | 9.902    | 9.783   | 9.675    |
| hsa-miR-3158-3p | 8.042      | 7.958    | 8.005    | 8.009   | 8.042    |
| hsa-miR-483-3p  | 12.651     | 17.257   | 16.924   | 24.210  | 16.351   |
| hsa-miR-520f-3p | 8.793      | 9.093    | 8.985    | 9.099   | 9.240    |
| hsa-miR-302c-3p | 8.546      | 8.659    | 8.704    | 8.924   | 8.722    |
| hsa-miR-887-3p  | 8.306      | 8.384    | 8.221    | 8.322   | 8.342    |
| hsa-miR-526b-3p | 8.651      | 8.662    | 8.722    | 8.832   | 8.808    |
| hsa-miR-1909-5p | 8.212      | 10.130   | 10.340   | 10.694  | 11.218   |
| hsa-miR-3688-3p | 8.947      | 9.255    | 9.207    | 9.091   | 9.082    |
| hsa-miR-488-3p  | 8.201      | 8.183    | 8.228    | 8.252   | 8.272    |
| hsa-miR-4319    | 7.745      | 7.882    | 7.786    | 7.801   | 7.782    |
| hsa-miR-200b-3p | 8.793      | 16.909   | 9.004    | 9.210   | 9.106    |
| hsa-miR-580-3p  | 7.474      | 7.554    | 7.551    | 7.611   | 7.528    |
| hsa-miR-203a-3p | 7.737      | 7.946    | 7.762    | 7.787   | 7.800    |
| hsa-miR-3619-5p | 7.164      | 7.247    | 7.189    | 7.209   | 7.200    |
| hsa-miR-3126-3p | 7.691      | 7.673    | 7.742    | 7.729   | 7.711    |
| hsa-miR-1251-5p | 7.317      | 7.292    | 7.293    | 7.336   | 7.325    |

| <b>miRNA</b>    | <b>median_Con</b> | <b>mean_LCa</b> | <b>mean_NTL</b> | <b>mean_OD</b> | <b>mean_Con</b> |
|-----------------|-------------------|-----------------|-----------------|----------------|-----------------|
| hsa-miR-1256    | 8.722             | 8.770           | 8.838           | 8.869          | 8.795           |
| hsa-miR-943     | 7.596             | 7.595           | 7.587           | 7.582          | 7.644           |
| hsa-miR-3687    | 7.016             | 7.081           | 7.086           | 7.062          | 7.029           |
| hsa-miR-3657    | 8.421             | 8.401           | 8.518           | 8.502          | 8.483           |
| hsa-miR-554     | 7.470             | 7.472           | 7.453           | 7.447          | 7.507           |
| hsa-miR-573     | 7.307             | 7.370           | 7.301           | 7.313          | 7.331           |
| hsa-miR-422a    | 7.326             | 7.373           | 7.313           | 7.414          | 7.386           |
| hsa-miR-95-3p   | 8.223             | 8.580           | 8.381           | 8.379          | 8.289           |
| hsa-miR-302f    | 8.030             | 8.073           | 7.994           | 8.092          | 8.068           |
| hsa-miR-25-5p   | 7.875             | 7.855           | 7.814           | 7.864          | 7.907           |
| hsa-miR-544a    | 8.712             | 8.985           | 8.799           | 8.947          | 8.874           |
| hsa-miR-122-5p  | 9.601             | 12.519          | 10.747          | 13.874         | 10.995          |
| hsa-miR-3664-5p | 7.689             | 7.686           | 7.688           | 7.638          | 7.681           |
| hsa-miR-3649    | 7.231             | 7.194           | 7.224           | 7.242          | 7.239           |
| hsa-miR-3171    | 8.823             | 8.978           | 9.203           | 9.050          | 9.181           |
| hsa-miR-224-3p  | 7.847             | 7.896           | 7.949           | 7.928          | 7.875           |
| hsa-miR-148a-5p | 8.025             | 8.197           | 8.188           | 8.113          | 8.078           |
| hsa-miR-1296-5p | 8.820             | 9.717           | 10.709          | 12.032         | 10.192          |
| hsa-miR-3680-5p | 7.847             | 7.856           | 7.872           | 7.910          | 7.863           |
| hsa-miR-640     | 8.358             | 8.438           | 8.816           | 8.870          | 8.641           |
| hsa-miR-3939    | 7.751             | 7.852           | 7.864           | 7.877          | 7.805           |
| hsa-miR-3178    | 6.909             | 7.002           | 6.980           | 6.971          | 6.937           |
| hsa-miR-33b-5p  | 7.981             | 8.055           | 8.018           | 8.016          | 7.975           |
| hsa-miR-218-5p  | 8.581             | 9.930           | 10.433          | 10.927         | 11.711          |
| hsa-miR-3165    | 7.792             | 7.808           | 7.824           | 7.872          | 7.840           |
| hsa-miR-632     | 7.998             | 7.973           | 7.938           | 7.957          | 8.000           |
| hsa-miR-589-5p  | 7.784             | 7.775           | 7.784           | 7.760          | 7.810           |
| hsa-miR-1178-3p | 8.421             | 8.476           | 8.446           | 8.519          | 8.575           |
| hsa-miR-551a    | 8.293             | 8.278           | 8.357           | 8.342          | 8.311           |
| hsa-miR-616-5p  | 7.870             | 7.933           | 7.861           | 7.860          | 7.873           |
| hsa-miR-425-5p  | 19451.763         | 22688.601       | 19350.096       | 19245.842      | 19841.448       |
| hsa-miR-2909    | 8.100             | 8.170           | 8.084           | 8.145          | 8.131           |
| hsa-miR-2113    | 7.876             | 7.933           | 8.031           | 8.072          | 7.957           |
| hsa-miR-3912-3p | 8.123             | 8.175           | 8.111           | 8.121          | 8.155           |
| hsa-miR-548i    | 7.819             | 7.777           | 7.831           | 7.794          | 7.843           |
| hsa-miR-3170    | 7.490             | 7.682           | 7.900           | 8.050          | 8.073           |
| hsa-miR-195-3p  | 8.243             | 9.313           | 9.204           | 9.101          | 9.620           |
| hsa-miR-124-3p  | 7.435             | 7.542           | 7.559           | 7.819          | 7.452           |

| <b>miRNA</b>     | <b>median_Con</b> | <b>mean_LCa</b> | <b>mean_NTL</b> | <b>mean_OD</b> | <b>mean_Con</b> |
|------------------|-------------------|-----------------|-----------------|----------------|-----------------|
| hsa-miR-26a-2-3p | 9.383             | 10.056          | 9.927           | 10.184         | 10.059          |
| hsa-miR-373-3p   | 8.121             | 8.218           | 8.640           | 8.229          | 8.195           |
| hsa-miR-4329     | 7.876             | 7.849           | 8.003           | 8.001          | 7.924           |
| hsa-miR-2355-3p  | 8.220             | 8.277           | 8.266           | 8.312          | 8.251           |
| hsa-miR-520c-3p  | 8.467             | 8.617           | 8.667           | 8.797          | 8.759           |
| hsa-miR-519d-3p  | 8.860             | 9.210           | 9.308           | 9.320          | 9.422           |
| hsa-let-7f-2-3p  | 9.315             | 9.747           | 9.571           | 9.909          | 9.840           |
| hsa-miR-4312     | 12.705            | 16.719          | 18.156          | 19.054         | 17.440          |
| hsa-miR-33a-3p   | 8.085             | 8.112           | 8.170           | 8.174          | 8.113           |
| hsa-miR-27b-5p   | 7.353             | 7.403           | 7.349           | 7.382          | 7.368           |
| hsa-miR-3646     | 12.870            | 19.979          | 18.693          | 17.314         | 19.253          |
| hsa-miR-1179     | 8.428             | 8.452           | 8.547           | 8.540          | 8.512           |
| hsa-miR-618      | 8.212             | 8.261           | 8.188           | 8.329          | 8.248           |
| hsa-miR-2114-5p  | 7.442             | 7.453           | 7.444           | 7.484          | 7.459           |
| hsa-miR-657      | 8.382             | 8.407           | 8.367           | 8.429          | 8.451           |
| hsa-miR-523-3p   | 7.388             | 7.438           | 7.454           | 7.419          | 7.413           |
| hsa-miR-3143     | 7.563             | 7.639           | 7.615           | 7.595          | 7.584           |
| hsa-miR-3913-5p  | 8.042             | 8.009           | 8.029           | 8.045          | 8.050           |
| hsa-miR-205-3p   | 7.359             | 7.425           | 7.430           | 7.372          | 7.411           |
| hsa-miR-603      | 8.134             | 8.182           | 8.228           | 8.167          | 8.167           |
| hsa-miR-619-3p   | 7.513             | 7.586           | 7.559           | 7.546          | 7.534           |
| hsa-miR-330-5p   | 8.052             | 8.066           | 8.061           | 8.027          | 8.078           |
| hsa-miR-4268     | 7.601             | 7.575           | 7.573           | 7.599          | 7.608           |
| hsa-miR-519c-3p  | 8.472             | 8.625           | 8.547           | 8.649          | 8.573           |
| hsa-miR-578      | 7.646             | 7.705           | 7.681           | 7.656          | 7.657           |
| hsa-miR-100-5p   | 303.243           | 473.736         | 377.402         | 485.731        | 466.605         |
| hsa-miR-548a-5p  | 8.553             | 8.841           | 8.746           | 8.760          | 8.807           |
| hsa-miR-3938     | 7.957             | 12.589          | 8.043           | 7.981          | 7.984           |
| hsa-miR-520g-3p  | 8.656             | 8.989           | 8.955           | 9.185          | 9.101           |
| hsa-miR-3922-3p  | 8.571             | 8.667           | 8.843           | 8.799          | 8.729           |
| hsa-miR-1253     | 7.438             | 7.429           | 7.471           | 7.451          | 7.469           |
| hsa-miR-4294     | 7.833             | 7.899           | 7.911           | 7.967          | 7.911           |
| hsa-miR-520b     | 8.417             | 8.624           | 8.604           | 8.622          | 8.648           |
| hsa-miR-649      | 7.396             | 7.447           | 7.395           | 7.415          | 7.404           |
| hsa-miR-1257     | 7.626             | 7.609           | 7.622           | 7.615          | 7.645           |
| hsa-miR-648      | 7.235             | 7.293           | 7.243           | 7.269          | 7.279           |
| hsa-miR-562      | 7.943             | 8.019           | 7.964           | 8.010          | 7.977           |
| hsa-miR-3921     | 8.081             | 8.161           | 8.120           | 8.397          | 8.159           |



| miRNA            | median_Con | mean_LCa | mean_NTLD | mean_OD | mean_Con |
|------------------|------------|----------|-----------|---------|----------|
| hsa-miR-676-5p   | 7.657      | 7.693    | 7.712     | 7.710   | 7.682    |
| hsa-miR-1538     | 8.295      | 8.512    | 8.476     | 8.597   | 8.527    |
| hsa-miR-1243     | 7.774      | 7.874    | 7.884     | 7.834   | 7.827    |
| hsa-miR-924      | 8.316      | 8.467    | 9.359     | 8.490   | 8.513    |
| hsa-miR-4320     | 8.064      | 8.074    | 8.099     | 8.092   | 8.112    |
| hsa-miR-3714     | 8.373      | 8.622    | 8.614     | 8.588   | 8.694    |
| hsa-miR-16-1-3p  | 8.462      | 8.808    | 8.866     | 9.013   | 9.012    |
| hsa-miR-651-5p   | 7.789      | 7.800    | 7.822     | 7.839   | 7.811    |
| hsa-miR-3145-3p  | 7.709      | 7.795    | 7.764     | 7.789   | 7.763    |
| hsa-miR-621      | 7.448      | 7.454    | 7.471     | 7.449   | 7.471    |
| hsa-miR-3689b-3p | 7.551      | 7.638    | 7.885     | 7.678   | 7.646    |
| hsa-miR-1306-3p  | 8.915      | 9.807    | 9.880     | 10.957  | 10.075   |
| hsa-miR-3622a-3p | 9.015      | 9.439    | 9.346     | 10.302  | 9.432    |
| hsa-miR-3670     | 8.490      | 8.540    | 8.568     | 8.583   | 8.544    |
| hsa-miR-371a-3p  | 8.602      | 8.893    | 8.756     | 9.137   | 8.866    |
| hsa-miR-1264     | 8.606      | 8.772    | 8.851     | 8.893   | 8.851    |
| hsa-miR-147a     | 7.739      | 7.764    | 7.753     | 7.738   | 7.747    |
| hsa-miR-670-5p   | 8.169      | 8.555    | 9.016     | 8.474   | 8.466    |
| hsa-miR-429      | 7.927      | 8.332    | 7.892     | 7.935   | 7.936    |
| hsa-miR-200a-3p  | 7.810      | 9.729    | 7.901     | 7.779   | 7.831    |
| hsa-miR-3675-5p  | 7.765      | 7.774    | 7.795     | 7.789   | 7.774    |
| hsa-miR-3674     | 7.488      | 7.510    | 7.527     | 7.523   | 7.510    |
| hsa-miR-518c-3p  | 8.455      | 8.569    | 8.535     | 8.541   | 8.553    |
| hsa-miR-506-3p   | 8.059      | 8.127    | 8.118     | 8.149   | 8.120    |
| hsa-miR-194-3p   | 8.095      | 8.133    | 8.119     | 8.128   | 8.116    |
| hsa-miR-489-3p   | 8.388      | 8.418    | 8.431     | 8.425   | 8.416    |

| miRNA           | sd_LCa   | sd_NTLD  | sd_OD   | sd_Con  |
|-----------------|----------|----------|---------|---------|
| hsa-miR-17-3p   | 55.453   | 92.992   | 27.713  | 23.088  |
| hsa-miR-21-3p   | 11.140   | 21.767   | 9.854   | 7.003   |
| hsa-miR-193a-3p | 3.559    | 4.206    | 3.059   | 1.607   |
| hsa-miR-18b-5p  | 37.113   | 65.655   | 31.702  | 36.680  |
| hsa-miR-18a-5p  | 73.703   | 144.725  | 66.749  | 79.980  |
| hsa-miR-338-3p  | 54.545   | 56.581   | 32.046  | 19.492  |
| hsa-miR-4286    | 9469.565 | 836.185  | 620.678 | 325.469 |
| hsa-miR-144-3p  | 2241.123 | 6143.419 | 949.126 | 920.884 |
| hsa-miR-301a-3p | 35.664   | 59.223   | 27.455  | 25.486  |

| <b>miRNA</b>    | <b>sd_LCa</b> | <b>sd_NTLD</b> | <b>sd_OD</b> | <b>sd_Con</b> |
|-----------------|---------------|----------------|--------------|---------------|
| hsa-miR-374c-5p | 21.252        | 20.121         | 40.649       | 32.722        |
| hsa-miR-374b-5p | 357.271       | 273.442        | 487.933      | 405.770       |
| hsa-miR-15a-5p  | 3276.679      | 3402.034       | 3298.452     | 3030.716      |
| hsa-miR-142-3p  | 4340.126      | 4690.967       | 2895.604     | 2083.829      |
| hsa-miR-106b-5p | 2369.453      | 2879.351       | 2919.147     | 2819.398      |
| hsa-miR-188-3p  | 0.951         | 1.616          | 0.722        | 0.595         |
| hsa-miR-590-5p  | 32.924        | 65.778         | 37.342       | 41.208        |
| hsa-miR-660-5p  | 130.883       | 158.092        | 136.365      | 143.374       |
| hsa-miR-101-3p  | 230.245       | 363.941        | 246.890      | 213.954       |
| hsa-miR-126-3p  | 842.523       | 724.007        | 711.479      | 788.308       |
| hsa-miR-30d-5p  | 3162.327      | 2245.339       | 1319.200     | 1248.516      |
| hsa-miR-29b-3p  | 106.559       | 141.291        | 126.079      | 89.809        |
| hsa-miR-101-5p  | 3.817         | 9.316          | 6.697        | 5.749         |
| hsa-miR-19a-3p  | 691.843       | 1040.322       | 824.671      | 668.705       |
| hsa-miR-500a-3p | 115.122       | 76.309         | 64.528       | 68.556        |
| hsa-miR-27a-3p  | 540.627       | 241.068        | 164.809      | 119.030       |
| hsa-miR-770-5p  | 0.815         | 2.050          | 0.574        | 0.576         |
| hsa-miR-15a-3p  | 3.352         | 5.026          | 3.051        | 5.271         |
| hsa-miR-16-5p   | 29744.557     | 24249.706      | 22965.008    | 24586.057     |
| hsa-let-7g-3p   | 0.659         | 0.969          | 0.690        | 0.881         |
| hsa-miR-144-5p  | 932.791       | 1074.498       | 1303.108     | 751.657       |
| hsa-miR-140-5p  | 62.890        | 68.880         | 59.556       | 62.991        |
| hsa-miR-1260a   | 6247.858      | 951.696        | 609.467      | 492.517       |
| hsa-miR-378b    | 7.638         | 3.614          | 4.293        | 3.337         |
| hsa-miR-320d    | 4664.688      | 1955.329       | 3447.710     | 2625.343      |
| hsa-miR-20a-5p  | 1868.729      | 2334.849       | 1327.053     | 2196.904      |
| hsa-miR-363-3p  | 3168.235      | 2854.304       | 3490.770     | 2893.280      |
| hsa-miR-625-5p  | 309.845       | 120.050        | 268.183      | 173.575       |
| hsa-miR-17-5p   | 1482.472      | 1428.882       | 1149.860     | 1392.604      |
| hsa-miR-320e    | 2771.232      | 1388.707       | 2414.299     | 1671.157      |
| hsa-miR-3607-3p | 1.587         | 1.164          | 3.183        | 3.314         |
| hsa-miR-107     | 4690.882      | 4825.364       | 2901.680     | 3458.425      |
| hsa-miR-320c    | 4356.637      | 724.285        | 2029.890     | 1323.715      |
| hsa-miR-374a-5p | 206.919       | 234.180        | 363.012      | 270.301       |
| hsa-miR-30a-5p  | 2120.401      | 62.952         | 37.370       | 38.631        |
| hsa-miR-96-5p   | 385.907       | 415.018        | 339.936      | 326.177       |
| hsa-miR-20b-5p  | 831.217       | 884.060        | 629.521      | 819.884       |
| hsa-miR-29c-3p  | 649.164       | 726.930        | 720.259      | 499.404       |

| <b>miRNA</b>    | <b>sd_LCa</b> | <b>sd_NTLD</b> | <b>sd_OD</b> | <b>sd_Con</b> |
|-----------------|---------------|----------------|--------------|---------------|
| hsa-miR-340-5p  | 54.625        | 57.670         | 46.230       | 34.463        |
| hsa-miR-1260b   | 3201.623      | 282.905        | 123.695      | 169.268       |
| hsa-miR-126-5p  | 8.169         | 14.076         | 17.068       | 13.233        |
| hsa-miR-3152-3p | 59.607        | 1.579          | 0.903        | 0.793         |
| hsa-miR-30e-5p  | 337.789       | 289.455        | 267.030      | 237.166       |
| hsa-miR-193a-5p | 8.466         | 4.166          | 6.704        | 4.851         |
| hsa-miR-145-5p  | 206.718       | 84.407         | 96.769       | 101.447       |
| hsa-miR-575     | 71.216        | 26.870         | 103.797      | 26.110        |
| hsa-miR-320b    | 4446.106      | 1621.841       | 3993.679     | 2988.968      |
| hsa-miR-103a-3p | 3939.850      | 3537.166       | 2876.200     | 2782.145      |
| hsa-miR-423-5p  | 1638.410      | 844.252        | 966.752      | 1432.893      |
| hsa-miR-502-3p  | 149.362       | 96.177         | 83.433       | 90.850        |
| hsa-miR-21-5p   | 1695.778      | 900.427        | 1318.530     | 1384.966      |
| hsa-miR-769-5p  | 15.263        | 10.339         | 9.044        | 8.713         |
| hsa-miR-3190-5p | 6.754         | 8.122          | 11.576       | 10.399        |
| hsa-miR-191-5p  | 19.057        | 19.239         | 18.305       | 56.718        |
| hsa-miR-324-3p  | 2649.649      | 1498.477       | 1795.636     | 2073.120      |
| hsa-miR-93-3p   | 66.949        | 85.563         | 54.024       | 130.747       |
| hsa-miR-3651    | 122.382       | 102.904        | 119.781      | 117.989       |
| hsa-miR-4281    | 19170.159     | 240.306        | 973.475      | 528.226       |
| hsa-miR-4284    | 632.279       | 534.002        | 604.633      | 1051.338      |
| hsa-miR-1290    | 13.336        | 6.696          | 8.613        | 5.077         |
| hsa-miR-130a-3p | 540.886       | 493.223        | 542.952      | 509.562       |
| hsa-miR-195-5p  | 50.021        | 37.926         | 63.216       | 143.554       |
| hsa-let-7i-3p   | 0.634         | 1.122          | 0.836        | 0.792         |
| hsa-miR-505-3p  | 106.791       | 60.089         | 72.941       | 54.007        |
| hsa-miR-381-3p  | 3.144         | 2.866          | 1.613        | 2.236         |
| hsa-miR-320a    | 2703.203      | 1276.498       | 1994.138     | 1684.078      |
| hsa-miR-3914    | 0.466         | 0.442          | 0.423        | 0.366         |
| hsa-miR-4282    | 0.564         | 0.435          | 0.542        | 0.789         |
| hsa-miR-1285-3p | 26.951        | 8.268          | 11.983       | 21.702        |
| hsa-miR-139-3p  | 5.394         | 4.543          | 4.862        | 8.275         |
| hsa-miR-148a-3p | 227.430       | 248.240        | 321.404      | 228.390       |
| hsa-miR-324-5p  | 326.635       | 185.246        | 187.875      | 204.775       |
| hsa-miR-502-5p  | 23.963        | 34.533         | 24.823       | 22.886        |
| hsa-miR-940     | 1219.835      | 46.713         | 268.428      | 130.674       |
| hsa-miR-3074-3p | 1.072         | 3.080          | 1.215        | 1.545         |
| hsa-miR-32-5p   | 2.259         | 4.047          | 1.115        | 0.801         |

| <b>miRNA</b>      | <b>sd_LCa</b> | <b>sd_NTLD</b> | <b>sd_OD</b> | <b>sd_Con</b> |
|-------------------|---------------|----------------|--------------|---------------|
| hsa-miR-26b-5p    | 2026.421      | 1650.258       | 3478.912     | 2573.418      |
| hsa-miR-23a-5p    | 1.521         | 1.925          | 1.475        | 0.784         |
| hsa-miR-629-3p    | 16.891        | 11.425         | 16.747       | 16.403        |
| hsa-miR-2110      | 13.846        | 5.415          | 8.350        | 8.414         |
| hsa-miR-624-5p    | 16.799        | 23.090         | 22.083       | 16.630        |
| hsa-miR-1249-3p   | 526.713       | 10.220         | 26.708       | 25.399        |
| hsa-miR-665       | 11.617        | 4.443          | 5.924        | 5.181         |
| hsa-miR-3138      | 275.950       | 7.501          | 14.707       | 4.891         |
| hsa-miR-3141      | 900.547       | 27.390         | 36.777       | 20.019        |
| hsa-miR-491-3p    | 7.613         | 7.024          | 13.429       | 2.151         |
| hsa-miR-628-3p    | 5.471         | 4.838          | 6.780        | 5.961         |
| hsa-miR-196b-5p   | 14.271        | 33.363         | 15.577       | 14.668        |
| hsa-miR-181a-5p   | 635.453       | 405.408        | 561.881      | 383.307       |
| hsa-miR-532-5p    | 141.179       | 106.740        | 136.447      | 132.567       |
| hsa-miR-559       | 0.520         | 2.805          | 0.940        | 0.854         |
| hsa-miR-182-5p    | 194.927       | 161.923        | 352.136      | 262.788       |
| hsa-miR-197-3p    | 430.689       | 297.396        | 534.572      | 441.600       |
| hsa-miR-874-3p    | 37.269        | 14.203         | 18.081       | 30.116        |
| hsa-miR-3127-5p   | 19.485        | 13.495         | 12.551       | 9.578         |
| hsa-miR-424-5p    | 48.156        | 58.223         | 55.390       | 49.735        |
| hsa-miR-212-3p    | 10.912        | 30.895         | 14.135       | 8.318         |
| hsa-miR-503-5p    | 1.489         | 1.628          | 1.048        | 1.307         |
| hsa-miR-129-2-3p  | 8.189         | 5.373          | 32.390       | 15.046        |
| hsa-miR-128-3p    | 524.250       | 390.534        | 617.269      | 427.264       |
| hsa-miR-151a-3p   | 869.542       | 373.262        | 503.696      | 414.033       |
| hsa-miR-2115-5p   | 3.564         | 2.830          | 1.977        | 1.414         |
| hsa-miR-219a-1-3p | 0.326         | 0.336          | 0.302        | 0.313         |
| hsa-let-7i-5p     | 6253.333      | 5286.292       | 5500.048     | 5680.246      |
| hsa-miR-888-5p    | 0.399         | 0.333          | 0.453        | 0.372         |
| hsa-miR-505-5p    | 232.374       | 91.220         | 179.105      | 142.818       |
| hsa-miR-452-3p    | 0.423         | 0.337          | 0.382        | 0.358         |
| hsa-miR-337-5p    | 0.556         | 0.928          | 0.505        | 0.615         |
| hsa-miR-584-5p    | 194.212       | 78.922         | 120.268      | 90.971        |
| hsa-miR-1180-3p   | 5.352         | 2.576          | 4.773        | 4.995         |
| hsa-miR-373-5p    | 2.154         | 0.666          | 0.626        | 0.554         |
| hsa-miR-181b-5p   | 30.766        | 19.236         | 40.365       | 20.554        |
| hsa-miR-3686      | 0.367         | 0.327          | 0.382        | 0.344         |
| hsa-miR-15b-3p    | 15.274        | 16.869         | 29.903       | 41.100        |

| <b>miRNA</b>      | <b>sd_LCa</b> | <b>sd_NTLD</b> | <b>sd_OD</b> | <b>sd_Con</b> |
|-------------------|---------------|----------------|--------------|---------------|
| hsa-miR-16-2-3p   | 32.826        | 58.893         | 208.983      | 227.762       |
| hsa-miR-454-3p    | 106.250       | 101.385        | 109.966      | 126.944       |
| hsa-miR-513a-3p   | 0.505         | 0.393          | 0.434        | 0.410         |
| hsa-miR-4289      | 0.380         | 0.449          | 0.429        | 0.403         |
| hsa-miR-450a-5p   | 3.554         | 2.955          | 4.834        | 2.927         |
| hsa-miR-620       | 0.446         | 0.384          | 0.490        | 0.438         |
| hsa-miR-150-3p    | 739.011       | 9.971          | 11.734       | 3.865         |
| hsa-miR-29c-5p    | 488.364       | 334.347        | 209.670      | 207.023       |
| hsa-miR-921       | 0.892         | 0.563          | 0.504        | 0.447         |
| hsa-miR-598-3p    | 3.718         | 5.778          | 5.299        | 4.513         |
| hsa-miR-129-1-3p  | 7.243         | 3.592          | 33.113       | 13.240        |
| hsa-miR-23b-3p    | 788.370       | 296.880        | 471.539      | 320.421       |
| hsa-miR-300       | 0.647         | 0.491          | 0.460        | 0.377         |
| hsa-miR-190a-5p   | 3.003         | 7.096          | 4.628        | 2.753         |
| hsa-let-7d-5p     | 3833.497      | 2104.546       | 2473.292     | 2870.585      |
| hsa-miR-548e-3p   | 1.568         | 2.188          | 3.000        | 2.286         |
| hsa-miR-518a-5p   | 0.612         | 0.483          | 0.535        | 0.400         |
| hsa-miR-7-5p      | 130.563       | 139.898        | 156.865      | 164.253       |
| hsa-miR-15b-5p    | 31159.700     | 25218.475      | 21857.545    | 18943.370     |
| hsa-miR-3200-5p   | 66.949        | 40.954         | 74.628       | 69.564        |
| hsa-miR-3121-3p   | 5.121         | 0.931          | 0.869        | 1.500         |
| hsa-miR-23a-3p    | 4274.746      | 2617.417       | 4833.304     | 2978.591      |
| hsa-miR-22-3p     | 4863.705      | 5055.145       | 4595.823     | 3037.685      |
| hsa-miR-4328      | 0.607         | 0.534          | 0.518        | 0.467         |
| hsa-miR-219a-5p   | 1.339         | 1.968          | 1.201        | 0.987         |
| hsa-miR-26a-5p    | 1902.959      | 1620.067       | 2164.707     | 1637.380      |
| hsa-miR-125b-1-3p | 1.580         | 0.882          | 1.273        | 2.448         |
| hsa-miR-3157-5p   | 1.258         | 1.419          | 1.032        | 0.909         |
| hsa-miR-362-3p    | 38.864        | 49.949         | 47.080       | 35.152        |
| hsa-miR-92a-1-5p  | 0.663         | 0.427          | 0.399        | 0.338         |
| hsa-let-7g-5p     | 5666.528      | 5560.928       | 3413.405     | 4658.224      |
| hsa-miR-3907      | 13.073        | 38.470         | 24.097       | 38.030        |
| hsa-miR-3134      | 0.532         | 0.421          | 0.627        | 0.475         |
| hsa-miR-4291      | 15.341        | 12.108         | 18.339       | 15.443        |
| hsa-miR-497-5p    | 2.096         | 3.102          | 2.902        | 2.509         |
| hsa-miR-610       | 2.387         | 2.419          | 2.825        | 2.646         |
| hsa-miR-99b-5p    | 82.578        | 33.185         | 36.678       | 32.516        |
| hsa-miR-26a-1-3p  | 1.637         | 4.945          | 4.185        | 2.053         |

| <b>miRNA</b>    | <b>sd_LCa</b> | <b>sd_NTLD</b> | <b>sd_OD</b> | <b>sd_Con</b> |
|-----------------|---------------|----------------|--------------|---------------|
| hsa-miR-501-5p  | 95.034        | 50.413         | 51.601       | 45.558        |
| hsa-miR-628-5p  | 3.282         | 4.293          | 5.506        | 4.240         |
| hsa-miR-3679-5p | 1729.760      | 72.005         | 116.865      | 46.360        |
| hsa-miR-1537-3p | 0.455         | 0.488          | 0.618        | 0.437         |
| hsa-miR-155-5p  | 53.172        | 53.475         | 78.051       | 60.445        |
| hsa-miR-330-3p  | 12.040        | 8.102          | 7.816        | 8.621         |
| hsa-miR-1252-5p | 0.620         | 0.423          | 0.557        | 0.463         |
| hsa-miR-93-5p   | 1776.958      | 1741.812       | 1414.959     | 2052.841      |
| hsa-miR-106b-3p | 0.764         | 1.001          | 0.663        | 2.790         |
| hsa-miR-3195    | 2602.654      | 63.405         | 201.997      | 36.327        |
| hsa-miR-582-5p  | 10.392        | 8.090          | 6.091        | 4.182         |
| hsa-miR-2861    | 896.371       | 179.381        | 1084.440     | 411.583       |
| hsa-miR-222-3p  | 61.152        | 70.590         | 60.964       | 92.685        |
| hsa-miR-151a-5p | 2290.956      | 1704.073       | 2418.727     | 1790.392      |
| hsa-miR-3198    | 136.580       | 89.896         | 100.738      | 61.909        |
| hsa-miR-4298    | 1800.714      | 26.166         | 39.269       | 21.660        |
| hsa-miR-29a-3p  | 576.187       | 515.325        | 575.486      | 621.215       |
| hsa-miR-3618    | 0.401         | 0.330          | 0.481        | 0.374         |
| hsa-miR-633     | 0.757         | 0.535          | 1.106        | 1.026         |
| hsa-miR-205-5p  | 3.589         | 0.441          | 0.563        | 0.374         |
| hsa-miR-1914-3p | 115.960       | 48.735         | 100.014      | 66.974        |
| hsa-miR-1973    | 63.313        | 24.581         | 33.690       | 15.416        |
| hsa-miR-3156-5p | 20.684        | 13.394         | 25.153       | 8.935         |
| hsa-miR-545-5p  | 0.572         | 0.428          | 0.580        | 0.498         |
| hsa-let-7f-5p   | 6816.235      | 5242.782       | 4465.128     | 5809.217      |
| hsa-miR-3668    | 0.512         | 0.396          | 0.509        | 0.438         |
| hsa-miR-3124-5p | 6.485         | 1.311          | 1.255        | 1.005         |
| hsa-miR-3663-3p | 10706.590     | 25.461         | 39.200       | 8.778         |
| hsa-miR-483-5p  | 329.466       | 30.714         | 58.223       | 15.121        |
| hsa-miR-556-5p  | 0.590         | 0.448          | 0.565        | 0.447         |
| hsa-miR-181c-5p | 10.910        | 12.050         | 10.413       | 9.801         |
| hsa-miR-548q    | 3.502         | 1.454          | 1.894        | 2.742         |
| hsa-miR-152-3p  | 3.685         | 3.971          | 4.951        | 4.973         |
| hsa-miR-155-3p  | 0.849         | 0.872          | 1.041        | 0.872         |
| hsa-miR-342-5p  | 201.726       | 89.300         | 124.251      | 122.650       |
| hsa-miR-125a-5p | 199.472       | 111.565        | 127.155      | 107.981       |
| hsa-miR-514b-5p | 98.349        | 4.412          | 2.268        | 1.142         |
| hsa-miR-181d-5p | 15.554        | 28.338         | 123.006      | 30.311        |

| <b>miRNA</b>      | <b>sd_LCa</b> | <b>sd_NTLD</b> | <b>sd_OD</b> | <b>sd_Con</b> |
|-------------------|---------------|----------------|--------------|---------------|
| hsa-miR-1915-3p   | 5245.105      | 83.387         | 695.547      | 258.904       |
| hsa-miR-2052      | 0.479         | 0.385          | 1.074        | 0.424         |
| hsa-miR-27b-3p    | 245.553       | 55.866         | 75.508       | 60.090        |
| hsa-miR-4314      | 1.782         | 2.061          | 1.406        | 0.838         |
| hsa-miR-513a-5p   | 94.827        | 158.036        | 55.611       | 32.462        |
| hsa-miR-652-3p    | 559.944       | 524.228        | 642.774      | 582.657       |
| hsa-miR-3128      | 0.761         | 0.539          | 0.636        | 0.577         |
| hsa-miR-1226-5p   | 7.590         | 1.352          | 2.312        | 0.909         |
| hsa-miR-495-3p    | 10.911        | 12.165         | 18.456       | 16.946        |
| hsa-miR-145-3p    | 1.155         | 0.900          | 1.538        | 2.189         |
| hsa-miR-142-5p    | 210.729       | 204.115        | 189.227      | 161.595       |
| hsa-miR-139-5p    | 8.093         | 4.671          | 6.654        | 6.552         |
| hsa-miR-3611      | 0.816         | 0.625          | 0.500        | 0.804         |
| hsa-miR-24-3p     | 672.520       | 434.654        | 645.003      | 428.581       |
| hsa-miR-3653-3p   | 333.817       | 212.342        | 355.619      | 298.837       |
| hsa-miR-876-3p    | 0.627         | 0.609          | 1.012        | 0.620         |
| hsa-miR-1248      | 0.445         | 0.330          | 0.389        | 0.360         |
| hsa-miR-31-5p     | 1.547         | 2.091          | 1.298        | 1.175         |
| hsa-miR-762       | 3007.847      | 36.297         | 66.296       | 34.360        |
| hsa-miR-454-5p    | 12.408        | 12.731         | 14.363       | 14.050        |
| hsa-miR-639       | 0.512         | 0.340          | 0.419        | 0.373         |
| hsa-miR-1207-5p   | 4445.496      | 78.230         | 243.781      | 123.535       |
| hsa-miR-3154      | 1.986         | 1.693          | 1.376        | 1.122         |
| hsa-miR-548p      | 0.636         | 0.381          | 0.453        | 0.471         |
| hsa-miR-4259      | 12.983        | 0.729          | 0.720        | 0.497         |
| hsa-miR-181a-2-3p | 5.513         | 4.335          | 10.920       | 5.114         |
| hsa-miR-3167      | 0.476         | 0.426          | 0.782        | 0.480         |
| hsa-miR-3605-5p   | 1.592         | 1.674          | 0.891        | 0.893         |
| hsa-miR-130b-3p   | 270.859       | 195.315        | 276.145      | 265.910       |
| hsa-miR-342-3p    | 1532.132      | 919.639        | 1029.938     | 1363.582      |
| hsa-miR-7-1-3p    | 40.287        | 37.257         | 59.549       | 47.663        |
| hsa-miR-3910      | 0.490         | 0.381          | 0.395        | 0.376         |
| hsa-miR-30c-1-3p  | 1.624         | 1.001          | 1.407        | 1.473         |
| hsa-miR-3656      | 1253.574      | 195.045        | 1045.995     | 642.876       |
| hsa-miR-539-5p    | 1.418         | 6.924          | 1.524        | 1.692         |
| hsa-miR-183-3p    | 22.090        | 6.754          | 13.082       | 7.742         |
| hsa-miR-199b-5p   | 80.815        | 30.925         | 36.224       | 22.506        |
| hsa-miR-642b-3p   | 1085.641      | 21.131         | 45.038       | 26.175        |

| <b>miRNA</b>     | <b>sd_LCa</b> | <b>sd_NTLD</b> | <b>sd_OD</b> | <b>sd_Con</b> |
|------------------|---------------|----------------|--------------|---------------|
| hsa-miR-574-3p   | 383.420       | 374.574        | 313.783      | 420.183       |
| hsa-miR-3186-3p  | 0.919         | 0.788          | 0.625        | 0.464         |
| hsa-miR-1302     | 0.603         | 0.504          | 0.668        | 0.515         |
| hsa-miR-19b-1-5p | 1.463         | 1.308          | 1.054        | 1.098         |
| hsa-miR-765      | 49.640        | 12.829         | 58.752       | 4.967         |
| hsa-miR-3147     | 12.473        | 1.295          | 1.209        | 0.747         |
| hsa-miR-1202     | 2930.859      | 100.527        | 415.801      | 91.319        |
| hsa-miR-4327     | 578.138       | 4.403          | 9.976        | 2.229         |
| hsa-miR-564      | 12.935        | 19.678         | 20.622       | 18.549        |
| hsa-miR-181c-3p  | 2.579         | 2.634          | 1.537        | 1.746         |
| hsa-miR-335-5p   | 13.108        | 12.464         | 21.764       | 18.365        |
| hsa-miR-606      | 0.481         | 0.366          | 0.480        | 0.426         |
| hsa-miR-19b-3p   | 9441.497      | 9024.374       | 8318.951     | 7545.538      |
| hsa-miR-365a-5p  | 1.276         | 1.189          | 0.706        | 0.587         |
| hsa-miR-3941     | 0.412         | 0.362          | 0.421        | 0.380         |
| hsa-miR-1295a    | 1.428         | 1.044          | 1.002        | 0.804         |
| hsa-miR-1304-5p  | 1.967         | 1.347          | 1.645        | 1.634         |
| hsa-miR-296-5p   | 114.437       | 26.167         | 22.775       | 28.891        |
| hsa-miR-1909-3p  | 0.352         | 0.388          | 0.361        | 0.383         |
| hsa-miR-587      | 0.389         | 0.331          | 0.393        | 0.326         |
| hsa-miR-629-5p   | 47.632        | 33.216         | 39.769       | 38.164        |
| hsa-miR-299-3p   | 0.420         | 0.445          | 0.429        | 0.394         |
| hsa-miR-3660     | 0.465         | 0.485          | 0.439        | 0.371         |
| hsa-miR-4324     | 2.678         | 15.958         | 6.179        | 5.871         |
| hsa-miR-1181     | 285.521       | 7.745          | 5.308        | 3.080         |
| hsa-miR-193b-3p  | 5.123         | 5.509          | 8.045        | 5.189         |
| hsa-miR-20a-3p   | 5.760         | 7.885          | 7.337        | 7.218         |
| hsa-miR-4270     | 7875.898      | 19.813         | 62.454       | 16.287        |
| hsa-miR-122-3p   | 1.125         | 0.714          | 3.172        | 1.737         |
| hsa-miR-4255     | 0.352         | 0.355          | 0.363        | 0.322         |
| hsa-miR-424-3p   | 5.292         | 9.276          | 6.150        | 4.527         |
| hsa-miR-216b-5p  | 0.448         | 0.345          | 0.397        | 0.353         |
| hsa-miR-1225-5p  | 7163.910      | 112.076        | 471.986      | 133.102       |
| hsa-miR-384      | 0.661         | 0.413          | 0.750        | 0.617         |
| hsa-miR-1305     | 72.958        | 58.290         | 78.739       | 44.453        |
| hsa-miR-376c-3p  | 5.905         | 8.711          | 8.624        | 9.432         |
| hsa-miR-132-3p   | 37.277        | 27.205         | 40.141       | 40.334        |
| hsa-miR-590-3p   | 1.074         | 0.459          | 0.730        | 0.796         |



| <b>miRNA</b>     | <b>sd_LCa</b> | <b>sd_NTLD</b> | <b>sd_OD</b> | <b>sd_Con</b> |
|------------------|---------------|----------------|--------------|---------------|
| hsa-miR-133a-3p  | 6.195         | 2.048          | 3.340        | 3.904         |
| hsa-miR-1255b-5p | 17.499        | 11.105         | 12.374       | 13.465        |
| hsa-miR-3945     | 172.160       | 1.321          | 2.621        | 0.959         |
| hsa-miR-1268a    | 711.033       | 57.144         | 183.846      | 105.721       |
| hsa-miR-148b-5p  | 3.010         | 5.184          | 4.961        | 3.904         |
| hsa-miR-3125     | 25.832        | 24.716         | 28.830       | 16.254        |
| hsa-miR-643      | 0.488         | 0.625          | 0.784        | 0.667         |
| hsa-miR-3130-3p  | 0.387         | 0.435          | 0.370        | 0.322         |
| hsa-miR-26b-3p   | 2.941         | 3.335          | 4.007        | 3.202         |
| hsa-miR-1976     | 9.973         | 5.325          | 50.848       | 5.175         |
| hsa-miR-9-3p     | 0.970         | 1.098          | 1.178        | 1.106         |
| hsa-miR-532-3p   | 1151.002      | 927.624        | 982.670      | 904.831       |
| hsa-miR-154-3p   | 0.613         | 0.753          | 0.953        | 0.981         |
| hsa-miR-744-5p   | 60.676        | 25.261         | 41.226       | 34.913        |
| hsa-miR-450b-5p  | 0.908         | 0.438          | 0.665        | 0.592         |
| hsa-miR-3201     | 0.431         | 0.438          | 0.444        | 0.397         |
| hsa-miR-3161     | 1.822         | 1.238          | 1.181        | 0.850         |
| hsa-miR-1245a    | 0.466         | 0.386          | 0.433        | 0.377         |
| hsa-miR-98-5p    | 93.155        | 73.561         | 60.400       | 178.068       |
| hsa-miR-3911     | 490.218       | 6.598          | 5.451        | 1.997         |
| hsa-miR-365a-3p  | 183.094       | 99.584         | 142.847      | 126.921       |
| hsa-miR-551b-3p  | 1.052         | 1.506          | 5.740        | 2.192         |
| hsa-miR-24-2-5p  | 0.430         | 0.354          | 0.381        | 0.369         |
| hsa-miR-3135a    | 0.448         | 0.352          | 0.383        | 0.323         |
| hsa-miR-150-5p   | 11764.707     | 6897.860       | 7204.760     | 10624.973     |
| hsa-miR-3137     | 7.347         | 5.651          | 7.499        | 5.102         |
| hsa-miR-18a-3p   | 7.176         | 5.096          | 6.177        | 5.727         |
| hsa-miR-3179     | 1.544         | 1.089          | 1.082        | 1.108         |
| hsa-miR-214-3p   | 1.202         | 0.790          | 1.063        | 0.777         |
| hsa-miR-138-1-3p | 0.650         | 0.416          | 0.549        | 0.515         |
| hsa-miR-656-3p   | 1.216         | 0.897          | 1.308        | 1.569         |
| hsa-miR-3926     | 16.204        | 6.304          | 4.777        | 12.299        |
| hsa-miR-3616-3p  | 3.710         | 5.005          | 4.547        | 5.772         |
| hsa-miR-1322     | 0.577         | 0.434          | 0.437        | 0.627         |
| hsa-miR-20b-3p   | 0.367         | 0.338          | 0.351        | 0.332         |
| hsa-miR-4293     | 0.388         | 0.329          | 0.354        | 0.342         |
| hsa-miR-766-3p   | 144.384       | 73.448         | 144.219      | 163.185       |
| hsa-miR-515-5p   | 1.057         | 0.653          | 1.496        | 1.383         |

| <b>miRNA</b>    | <b>sd_LCa</b> | <b>sd_NTLD</b> | <b>sd_OD</b> | <b>sd_Con</b> |
|-----------------|---------------|----------------|--------------|---------------|
| hsa-miR-135a-3p | 136.627       | 31.883         | 26.456       | 4.963         |
| hsa-miR-1263    | 0.368         | 0.326          | 0.443        | 0.409         |
| hsa-miR-1273c   | 3.917         | 7.230          | 7.496        | 1.836         |
| hsa-miR-30c-5p  | 4879.672      | 3139.192       | 3275.050     | 3388.025      |
| hsa-miR-550b-3p | 0.781         | 0.794          | 0.706        | 0.864         |
| hsa-miR-1275    | 560.783       | 59.763         | 147.496      | 60.467        |
| hsa-miR-3934-5p | 7.678         | 7.671          | 5.285        | 3.724         |
| hsa-miR-187-3p  | 0.431         | 0.396          | 0.447        | 0.390         |
| hsa-let-7a-3p   | 0.939         | 0.788          | 1.627        | 1.350         |
| hsa-miR-208b-3p | 0.399         | 0.343          | 3.498        | 0.381         |
| hsa-miR-494-3p  | 4294.109      | 3839.956       | 5272.469     | 1519.629      |
| hsa-miR-486-3p  | 2.484         | 1.344          | 1.971        | 1.377         |
| hsa-let-7d-3p   | 18.525        | 185.826        | 199.350      | 35.406        |
| hsa-miR-491-5p  | 1.031         | 0.869          | 1.012        | 1.582         |
| hsa-miR-146b-5p | 37.242        | 39.941         | 64.191       | 43.237        |
| hsa-miR-143-3p  | 1.321         | 1.224          | 1.190        | 1.077         |
| hsa-miR-3197    | 0.658         | 0.680          | 0.811        | 0.647         |
| hsa-miR-3118    | 0.515         | 0.418          | 0.667        | 0.540         |
| hsa-miR-361-5p  | 200.950       | 132.487        | 161.810      | 134.784       |
| hsa-miR-208a-3p | 0.397         | 0.361          | 0.434        | 0.349         |
| hsa-miR-617     | 4.254         | 3.331          | 4.337        | 3.649         |
| hsa-miR-542-5p  | 7.303         | 7.502          | 4.979        | 6.921         |
| hsa-miR-1301-3p | 0.774         | 0.642          | 0.596        | 0.553         |
| hsa-miR-379-5p  | 0.544         | 0.863          | 0.659        | 0.758         |
| hsa-miR-33b-3p  | 76.383        | 16.711         | 177.863      | 99.125        |
| hsa-miR-379-3p  | 0.465         | 0.423          | 0.493        | 0.470         |
| hsa-miR-423-3p  | 25.041        | 19.699         | 24.092       | 21.279        |
| hsa-miR-103b    | 1.181         | 0.666          | 1.279        | 0.783         |
| hsa-miR-375     | 10.237        | 0.349          | 0.348        | 0.298         |
| hsa-miR-4271    | 200.777       | 8.676          | 15.496       | 8.417         |
| hsa-miR-3126-5p | 0.451         | 0.358          | 0.351        | 0.352         |
| hsa-miR-326     | 42.522        | 25.492         | 21.846       | 23.428        |
| hsa-miR-1228-3p | 153.938       | 26.508         | 130.783      | 78.676        |
| hsa-miR-1307-3p | 6.293         | 3.584          | 10.764       | 6.818         |
| hsa-miR-138-5p  | 0.353         | 0.770          | 0.398        | 0.404         |
| hsa-miR-183-5p  | 612.397       | 373.531        | 371.570      | 288.834       |
| hsa-miR-1273e   | 5.482         | 2.764          | 3.694        | 5.775         |
| hsa-miR-4323    | 41.470        | 23.314         | 44.398       | 32.186        |

| <b>miRNA</b>     | <b>sd_LCa</b> | <b>sd_NTLD</b> | <b>sd_OD</b> | <b>sd_Con</b> |
|------------------|---------------|----------------|--------------|---------------|
| hsa-miR-3937     | 194.866       | 0.925          | 1.649        | 1.187         |
| hsa-miR-3176     | 6.174         | 4.741          | 5.314        | 5.733         |
| hsa-miR-711      | 61.441        | 1.550          | 0.785        | 0.572         |
| hsa-miR-449c-3p  | 2.559         | 2.521          | 1.491        | 1.388         |
| hsa-miR-4253     | 11.935        | 0.893          | 1.191        | 1.027         |
| hsa-miR-153-3p   | 0.449         | 0.399          | 0.369        | 0.363         |
| hsa-miR-337-3p   | 13.453        | 140.244        | 80.596       | 16.118        |
| hsa-miR-4299     | 735.448       | 433.538        | 687.317      | 450.923       |
| hsa-miR-3606-5p  | 1.000         | 0.602          | 0.925        | 0.633         |
| hsa-miR-30b-3p   | 1.006         | 0.815          | 0.835        | 0.717         |
| hsa-miR-3168     | 0.384         | 0.299          | 0.374        | 0.333         |
| hsa-miR-890      | 0.433         | 0.369          | 0.406        | 0.376         |
| hsa-miR-3193     | 0.603         | 0.475          | 0.490        | 0.424         |
| hsa-miR-1321     | 0.664         | 0.825          | 0.532        | 0.442         |
| hsa-miR-22-5p    | 13.753        | 12.448         | 20.020       | 14.396        |
| hsa-miR-516b-5p  | 0.579         | 0.477          | 0.523        | 0.403         |
| hsa-miR-3155a    | 0.353         | 0.385          | 0.384        | 0.326         |
| hsa-miR-3917     | 5.979         | 2.116          | 3.294        | 2.663         |
| hsa-miR-10b-5p   | 795.756       | 7.187          | 3.418        | 2.771         |
| hsa-miR-3189-3p  | 0.636         | 1.288          | 0.521        | 0.467         |
| hsa-miR-29b-2-5p | 1.369         | 1.197          | 1.320        | 1.955         |
| hsa-miR-3609     | 1.395         | 0.992          | 1.011        | 0.694         |
| hsa-miR-518f-3p  | 0.637         | 0.433          | 0.626        | 0.556         |
| hsa-miR-210-3p   | 392.189       | 275.268        | 456.464      | 305.232       |
| hsa-miR-1231     | 0.345         | 0.293          | 0.314        | 0.333         |
| hsa-miR-378c     | 1.003         | 0.746          | 0.806        | 0.629         |
| hsa-miR-4257     | 22.686        | 5.133          | 4.711        | 5.221         |
| hsa-miR-3180-3p  | 91.072        | 33.946         | 79.811       | 46.840        |
| hsa-miR-3677-3p  | 1.055         | 0.503          | 0.418        | 0.418         |
| hsa-miR-374a-3p  | 1.309         | 0.508          | 0.770        | 0.675         |
| hsa-miR-568      | 0.577         | 0.452          | 0.561        | 0.472         |
| hsa-miR-3659     | 1.933         | 2.854          | 0.493        | 0.382         |
| hsa-miR-431-3p   | 0.539         | 0.431          | 0.561        | 0.452         |
| hsa-miR-409-3p   | 91.822        | 51.311         | 67.870       | 74.199        |
| hsa-miR-3652     | 24.788        | 21.827         | 22.450       | 14.310        |
| hsa-miR-1972     | 277.623       | 50.109         | 66.032       | 163.796       |
| hsa-miR-498      | 8.049         | 0.663          | 0.911        | 2.894         |
| hsa-miR-2276-3p  | 51.582        | 3.624          | 10.713       | 2.563         |

| <b>miRNA</b>    | <b>sd_LCa</b> | <b>sd_NTLD</b> | <b>sd_OD</b> | <b>sd_Con</b> |
|-----------------|---------------|----------------|--------------|---------------|
| hsa-miR-323b-5p | 0.436         | 0.434          | 0.447        | 0.373         |
| hsa-miR-369-5p  | 1.236         | 16.365         | 4.400        | 3.312         |
| hsa-miR-1234-3p | 110.412       | 39.862         | 148.825      | 84.099        |
| hsa-miR-1183    | 34.712        | 8.071          | 9.440        | 14.478        |
| hsa-miR-1261    | 0.362         | 0.375          | 0.534        | 0.387         |
| hsa-miR-3188    | 132.698       | 1.723          | 3.655        | 5.151         |
| hsa-miR-3202    | 59.630        | 2.115          | 1.014        | 0.884         |
| hsa-miR-577     | 0.555         | 0.436          | 0.611        | 0.486         |
| hsa-miR-1208    | 0.538         | 0.540          | 0.472        | 0.433         |
| hsa-miR-92b-3p  | 11.481        | 7.196          | 25.232       | 19.618        |
| hsa-miR-1284    | 0.547         | 0.645          | 4.322        | 0.962         |
| hsa-miR-3944-3p | 0.376         | 0.364          | 0.363        | 0.364         |
| hsa-miR-28-5p   | 49.772        | 48.465         | 50.824       | 49.592        |
| hsa-miR-1262    | 0.536         | 0.415          | 0.529        | 0.523         |
| hsa-miR-3610    | 69.801        | 1.033          | 1.176        | 0.849         |
| hsa-miR-519e-5p | 0.906         | 1.080          | 0.507        | 0.830         |
| hsa-miR-548j-5p | 0.745         | 0.630          | 0.988        | 8.199         |
| hsa-miR-3936    | 0.418         | 0.387          | 0.375        | 0.321         |
| hsa-miR-135b-3p | 0.424         | 0.375          | 0.393        | 0.417         |
| hsa-miR-708-5p  | 0.469         | 0.389          | 0.468        | 0.482         |
| hsa-miR-323b-3p | 0.345         | 0.302          | 0.295        | 0.328         |
| hsa-miR-124-5p  | 0.411         | 0.339          | 0.400        | 0.341         |
| hsa-miR-611     | 0.421         | 0.397          | 0.436        | 0.397         |
| hsa-miR-188-5p  | 483.895       | 15.227         | 45.645       | 10.883        |
| hsa-miR-377-3p  | 3.361         | 5.606          | 3.957        | 4.119         |
| hsa-miR-1229-3p | 8.754         | 6.456          | 9.131        | 9.738         |
| hsa-miR-604     | 0.556         | 0.369          | 0.498        | 0.461         |
| hsa-miR-3122    | 0.394         | 0.410          | 0.343        | 0.303         |
| hsa-miR-361-3p  | 465.925       | 240.989        | 266.232      | 310.609       |
| hsa-miR-4313    | 44.195        | 23.753         | 190.743      | 90.901        |
| hsa-miR-449b-3p | 10.807        | 172.950        | 68.090       | 13.935        |
| hsa-miR-654-5p  | 1.022         | 0.813          | 0.854        | 0.867         |
| hsa-miR-1272    | 0.361         | 0.295          | 0.339        | 0.298         |
| hsa-let-7a-5p   | 13931.442     | 12741.434      | 7335.104     | 10126.297     |
| hsa-miR-9-5p    | 0.450         | 0.432          | 0.785        | 0.546         |
| hsa-miR-2114-3p | 0.396         | 0.375          | 0.375        | 0.337         |
| hsa-miR-1182    | 18.377        | 2.836          | 2.650        | 0.890         |
| hsa-miR-583     | 1.380         | 0.447          | 0.831        | 0.335         |

| miRNA             | sd_LCa    | sd_NTLD   | sd_OD     | sd_Con   |
|-------------------|-----------|-----------|-----------|----------|
| hsa-miR-1297      | 0.487     | 0.442     | 0.438     | 0.370    |
| hsa-miR-933       | 10.790    | 2.608     | 10.574    | 16.877   |
| hsa-miR-24-1-5p   | 0.736     | 0.790     | 0.821     | 0.618    |
| hsa-miR-199a-3p   | 50.830    | 42.372    | 30.733    | 33.479   |
| hsa-miR-675-3p    | 0.935     | 1.168     | 1.504     | 1.124    |
| hsa-miR-2355-5p   | 1.101     | 1.744     | 0.761     | 0.744    |
| hsa-let-7b-5p     | 14471.395 | 12077.359 | 14729.482 | 9561.192 |
| hsa-miR-202-3p    | 1.658     | 23.108    | 1.252     | 1.070    |
| hsa-miR-664a-5p   | 51.663    | 43.170    | 34.258    | 30.408   |
| hsa-miR-219a-2-3p | 0.369     | 0.406     | 0.412     | 0.345    |
| hsa-miR-1273d     | 4.634     | 2.271     | 2.598     | 2.819    |
| hsa-miR-3140-3p   | 0.529     | 0.621     | 0.564     | 0.546    |
| hsa-miR-935       | 0.461     | 0.438     | 0.590     | 0.457    |
| hsa-miR-875-3p    | 0.412     | 0.403     | 0.434     | 0.383    |
| hsa-miR-545-3p    | 0.873     | 1.353     | 0.938     | 0.708    |
| hsa-miR-127-3p    | 7.004     | 4.991     | 6.892     | 5.585    |
| hsa-miR-3616-5p   | 0.489     | 0.353     | 0.430     | 0.357    |
| hsa-miR-137       | 0.457     | 0.338     | 0.419     | 0.380    |
| hsa-miR-3665      | 1276.291  | 96.969    | 694.457   | 228.409  |
| hsa-miR-192-3p    | 4.810     | 7.491     | 5.768     | 4.623    |
| hsa-miR-671-5p    | 252.442   | 14.546    | 32.648    | 15.731   |
| hsa-miR-431-5p    | 2.117     | 2.617     | 1.861     | 2.293    |
| hsa-miR-668-3p    | 0.859     | 1.776     | 0.824     | 1.255    |
| hsa-miR-100-3p    | 0.606     | 0.462     | 0.563     | 0.556    |
| hsa-miR-1911-3p   | 0.613     | 0.732     | 1.634     | 0.895    |
| hsa-miR-1224-5p   | 66.596    | 7.833     | 22.190    | 15.150   |
| hsa-miR-186-5p    | 1188.460  | 495.667   | 576.101   | 445.471  |
| hsa-miR-3648      | 1071.683  | 7.879     | 4.010     | 1.923    |
| hsa-miR-148b-3p   | 108.797   | 126.707   | 111.046   | 85.665   |
| hsa-miR-378a-3p   | 225.365   | 89.425    | 156.704   | 103.543  |
| hsa-miR-3658      | 0.458     | 0.408     | 0.446     | 0.399    |
| hsa-miR-3184-5p   | 0.413     | 0.327     | 0.396     | 0.354    |
| hsa-miR-1233-3p   | 0.936     | 0.959     | 0.928     | 0.826    |
| hsa-miR-566       | 4.560     | 1.434     | 1.627     | 1.924    |
| hsa-miR-548c-3p   | 1.338     | 2.533     | 2.625     | 2.348    |
| hsa-miR-4251      | 1.220     | 0.730     | 0.481     | 0.422    |
| hsa-miR-1471      | 87.694    | 12.936    | 14.608    | 9.377    |
| hsa-miR-2115-3p   | 0.482     | 0.400     | 0.553     | 0.428    |

| <b>miRNA</b>      | <b>sd_LCa</b> | <b>sd_NTLD</b> | <b>sd_OD</b> | <b>sd_Con</b> |
|-------------------|---------------|----------------|--------------|---------------|
| hsa-miR-630       | 367.326       | 121.811        | 90.409       | 7.919         |
| hsa-miR-4274      | 53.202        | 5.065          | 8.455        | 8.814         |
| hsa-miR-571       | 2.812         | 1.561          | 3.645        | 3.223         |
| hsa-miR-125a-3p   | 17.127        | 8.877          | 22.612       | 12.075        |
| hsa-miR-518e-5p   | 1.058         | 0.457          | 0.510        | 0.431         |
| hsa-miR-184       | 1.364         | 0.731          | 38.976       | 0.607         |
| hsa-miR-551b-5p   | 0.421         | 0.438          | 0.369        | 0.351         |
| hsa-miR-3916      | 0.553         | 0.905          | 0.804        | 0.517         |
| hsa-miR-509-3p    | 0.408         | 0.413          | 0.530        | 0.407         |
| hsa-miR-10a-5p    | 319.659       | 21.755         | 30.831       | 24.369        |
| hsa-miR-646       | 0.396         | 0.472          | 0.438        | 0.396         |
| hsa-miR-518b      | 1.335         | 0.643          | 1.113        | 0.663         |
| hsa-miR-410-3p    | 1.732         | 2.879          | 2.067        | 2.690         |
| hsa-miR-411-3p    | 0.615         | 9.019          | 5.007        | 0.856         |
| hsa-miR-3918      | 0.570         | 0.405          | 0.382        | 0.336         |
| hsa-miR-30d-3p    | 0.448         | 0.566          | 0.610        | 0.467         |
| hsa-miR-1-3p      | 0.742         | 0.705          | 0.757        | 0.597         |
| hsa-miR-4252      | 1.789         | 5.044          | 4.641        | 1.597         |
| hsa-miR-601       | 14.552        | 1.151          | 2.251        | 0.958         |
| hsa-miR-3605-3p   | 5.701         | 11.979         | 55.835       | 6.357         |
| hsa-miR-3679-3p   | 18.816        | 5.387          | 11.423       | 9.894         |
| hsa-miR-487b-3p   | 6.161         | 7.587          | 7.324        | 7.175         |
| hsa-miR-362-5p    | 217.166       | 107.093        | 107.175      | 135.880       |
| hsa-miR-922       | 0.398         | 0.395          | 0.461        | 0.388         |
| hsa-miR-3654      | 1.182         | 1.809          | 1.050        | 0.647         |
| hsa-miR-3940-3p   | 12.139        | 20.257         | 17.481       | 13.136        |
| hsa-miR-3667-3p   | 0.486         | 0.551          | 0.715        | 1.408         |
| hsa-miR-138-2-3p  | 4.489         | 3.389          | 3.138        | 4.822         |
| hsa-miR-378a-5p   | 119.994       | 75.846         | 61.487       | 69.029        |
| hsa-miR-28-3p     | 1.736         | 0.945          | 1.136        | 1.007         |
| hsa-miR-141-3p    | 31.142        | 0.791          | 0.972        | 0.479         |
| hsa-miR-615-5p    | 1.381         | 0.393          | 0.647        | 0.597         |
| hsa-miR-622       | 18.610        | 4.703          | 5.747        | 8.953         |
| hsa-miR-3175      | 0.324         | 0.280          | 0.326        | 0.289         |
| hsa-miR-1237-3p   | 24.851        | 11.098         | 44.033       | 21.690        |
| hsa-miR-297       | 0.531         | 0.573          | 0.484        | 0.537         |
| hsa-miR-4318      | 31.131        | 24.880         | 24.721       | 119.714       |
| hsa-miR-103a-2-5p | 9.909         | 7.940          | 10.724       | 9.061         |

| <b>miRNA</b>    | <b>sd_LCa</b> | <b>sd_NTLD</b> | <b>sd_OD</b> | <b>sd_Con</b> |
|-----------------|---------------|----------------|--------------|---------------|
| hsa-miR-659-3p  | 39.686        | 1.048          | 0.935        | 0.713         |
| hsa-miR-548g-3p | 1.745         | 1.162          | 1.235        | 1.478         |
| hsa-miR-525-5p  | 0.901         | 0.571          | 0.701        | 0.545         |
| hsa-miR-4269    | 1.862         | 3.613          | 2.445        | 2.314         |
| hsa-miR-140-3p  | 5020.226      | 3970.454       | 3320.716     | 3526.279      |
| hsa-miR-193b-5p | 2.905         | 1.713          | 1.366        | 0.746         |
| hsa-miR-3115    | 0.790         | 0.870          | 1.295        | 0.869         |
| hsa-miR-4280    | 0.487         | 0.418          | 0.702        | 0.424         |
| hsa-miR-641     | 2.249         | 1.934          | 2.778        | 2.326         |
| hsa-miR-3065-5p | 0.400         | 0.354          | 0.391        | 0.408         |
| hsa-miR-1255a   | 1.726         | 2.025          | 2.239        | 2.031         |
| hsa-miR-934     | 0.372         | 0.459          | 0.370        | 0.339         |
| hsa-miR-448     | 0.666         | 0.557          | 1.019        | 0.572         |
| hsa-miR-3675-3p | 10.697        | 6.420          | 14.101       | 13.695        |
| hsa-miR-589-3p  | 3.194         | 1.825          | 2.105        | 2.127         |
| hsa-miR-3130-5p | 1.359         | 0.923          | 1.103        | 1.464         |
| hsa-miR-4254    | 8.584         | 13.138         | 24.761       | 10.545        |
| hsa-miR-3909    | 0.432         | 0.309          | 0.343        | 0.322         |
| hsa-miR-3132    | 1.435         | 1.679          | 2.546        | 0.893         |
| hsa-miR-637     | 0.934         | 0.541          | 0.559        | 0.501         |
| hsa-miR-1276    | 0.678         | 0.492          | 0.455        | 0.457         |
| hsa-miR-3194-5p | 287.187       | 3.914          | 2.912        | 1.418         |
| hsa-miR-30b-5p  | 9570.874      | 7237.618       | 7306.915     | 6758.873      |
| hsa-miR-329-3p  | 6.797         | 4.920          | 6.995        | 6.040         |
| hsa-miR-221-5p  | 3.950         | 4.037          | 3.532        | 3.285         |
| hsa-miR-10b-3p  | 0.991         | 1.577          | 2.149        | 0.569         |
| hsa-miR-663a    | 240.248       | 13.117         | 36.218       | 8.320         |
| hsa-miR-3672    | 0.616         | 0.437          | 0.597        | 0.501         |
| hsa-miR-377-5p  | 0.619         | 0.507          | 0.567        | 0.544         |
| hsa-miR-650     | 3.690         | 0.884          | 1.449        | 2.784         |
| hsa-miR-146a-5p | 116.104       | 55.684         | 81.695       | 71.675        |
| hsa-miR-3117-3p | 1.315         | 1.262          | 1.418        | 2.078         |
| hsa-miR-127-5p  | 0.352         | 0.368          | 0.361        | 0.299         |
| hsa-miR-892a    | 0.799         | 0.737          | 1.118        | 0.754         |
| hsa-miR-1247-5p | 1.016         | 0.458          | 0.397        | 0.367         |
| hsa-let-7c-5p   | 3574.492      | 2242.674       | 2934.637     | 2440.397      |
| hsa-miR-1277-3p | 1.053         | 0.612          | 1.395        | 1.836         |
| hsa-miR-132-5p  | 1.441         | 1.049          | 3.824        | 1.519         |

| <b>miRNA</b>     | <b>sd_LCa</b> | <b>sd_NTLD</b> | <b>sd_OD</b> | <b>sd_Con</b> |
|------------------|---------------|----------------|--------------|---------------|
| hsa-miR-550a-3p  | 729.753       | 533.837        | 505.172      | 442.110       |
| hsa-miR-3924     | 1.140         | 13.370         | 1.527        | 1.586         |
| hsa-miR-452-5p   | 0.409         | 0.410          | 0.392        | 0.353         |
| hsa-miR-380-3p   | 1.028         | 0.841          | 1.956        | 2.141         |
| hsa-miR-638      | 762.464       | 88.771         | 661.060      | 176.306       |
| hsa-miR-548s     | 0.558         | 0.371          | 0.460        | 0.399         |
| hsa-miR-1908-5p  | 1.009         | 0.539          | 0.783        | 0.631         |
| hsa-miR-760      | 2.053         | 1.054          | 1.295        | 1.296         |
| hsa-miR-3925-5p  | 0.979         | 0.636          | 0.498        | 0.326         |
| hsa-miR-1207-3p  | 0.456         | 0.606          | 1.357        | 0.562         |
| hsa-miR-3929     | 0.406         | 0.345          | 0.456        | 0.350         |
| hsa-miR-509-5p   | 1.059         | 0.719          | 0.965        | 0.667         |
| hsa-miR-106a-3p  | 0.683         | 0.565          | 0.796        | 0.707         |
| hsa-miR-3920     | 1.367         | 1.246          | 2.141        | 1.584         |
| hsa-miR-654-3p   | 20.019        | 20.023         | 27.827       | 19.859        |
| hsa-miR-3123     | 0.390         | 0.321          | 0.387        | 0.337         |
| hsa-miR-542-3p   | 1.334         | 1.657          | 1.212        | 1.124         |
| hsa-miR-4272     | 0.464         | 0.371          | 0.461        | 0.408         |
| hsa-miR-1206     | 0.507         | 0.402          | 0.535        | 0.447         |
| hsa-miR-223-3p   | 24430.752     | 23783.503      | 23566.577    | 22007.508     |
| hsa-miR-576-5p   | 2.018         | 4.744          | 20.151       | 5.495         |
| hsa-miR-920      | 0.361         | 0.398          | 0.360        | 0.325         |
| hsa-miR-802      | 0.516         | 0.384          | 0.497        | 0.480         |
| hsa-miR-200c-3p  | 41.672        | 5.735          | 6.579        | 7.393         |
| hsa-miR-466      | 3.393         | 11.227         | 7.988        | 8.012         |
| hsa-miR-34a-5p   | 69.101        | 42.407         | 44.255       | 8.818         |
| hsa-miR-485-3p   | 27.191        | 16.065         | 45.114       | 18.059        |
| hsa-miR-331-3p   | 4793.166      | 4659.678       | 3827.370     | 3385.430      |
| hsa-miR-761      | 0.366         | 0.364          | 0.341        | 0.322         |
| hsa-miR-572      | 19.598        | 8.679          | 28.666       | 10.505        |
| hsa-miR-376a-3p  | 12.211        | 12.097         | 13.637       | 13.272        |
| hsa-miR-3150b-3p | 0.455         | 0.681          | 0.475        | 0.368         |
| hsa-miR-1910-5p  | 4.202         | 16.418         | 40.981       | 12.510        |
| hsa-miR-512-3p   | 0.627         | 0.616          | 0.746        | 0.549         |
| hsa-miR-548d-3p  | 0.621         | 0.801          | 2.116        | 0.643         |
| hsa-miR-3682-3p  | 11.340        | 2.263          | 4.228        | 1.496         |
| hsa-miR-3617-5p  | 1.232         | 0.370          | 0.413        | 0.353         |
| hsa-miR-338-5p   | 1.844         | 0.671          | 6.890        | 1.953         |



| <b>miRNA</b>     | <b>sd_LCa</b> | <b>sd_NTLD</b> | <b>sd_OD</b> | <b>sd_Con</b> |
|------------------|---------------|----------------|--------------|---------------|
| hsa-miR-758-3p   | 2.619         | 4.183          | 3.982        | 2.938         |
| hsa-miR-141-5p   | 0.376         | 0.317          | 0.361        | 0.344         |
| hsa-miR-1246     | 212.493       | 156.360        | 207.361      | 91.519        |
| hsa-miR-30e-3p   | 125.513       | 120.326        | 166.990      | 98.506        |
| hsa-miR-224-5p   | 5.434         | 3.254          | 4.344        | 4.207         |
| hsa-miR-3146     | 0.375         | 0.379          | 0.412        | 0.370         |
| hsa-miR-450b-3p  | 0.688         | 0.914          | 0.963        | 0.902         |
| hsa-miR-3928-3p  | 0.317         | 0.332          | 0.313        | 0.300         |
| hsa-miR-892b     | 9.742         | 8.779          | 12.819       | 6.906         |
| hsa-miR-3116     | 0.344         | 0.303          | 0.339        | 0.330         |
| hsa-miR-4258     | 0.743         | 0.955          | 1.087        | 0.761         |
| hsa-miR-323a-3p  | 5.808         | 4.684          | 6.475        | 6.868         |
| hsa-miR-147b     | 0.426         | 0.377          | 0.475        | 0.397         |
| hsa-miR-563      | 10.404        | 9.387          | 31.224       | 20.471        |
| hsa-miR-2116-5p  | 0.405         | 0.324          | 0.413        | 0.399         |
| hsa-miR-92a-3p   | 22418.064     | 18187.211      | 19848.163    | 18086.407     |
| hsa-miR-520h     | 0.823         | 0.868          | 1.832        | 1.049         |
| hsa-miR-4322     | 101.411       | 0.457          | 0.830        | 0.944         |
| hsa-miR-3713     | 13.266        | 0.834          | 1.775        | 0.409         |
| hsa-miR-371a-5p  | 15.558        | 1.435          | 2.728        | 2.234         |
| hsa-miR-3655     | 0.372         | 0.373          | 0.367        | 0.363         |
| hsa-miR-31-3p    | 0.506         | 0.364          | 0.445        | 0.447         |
| hsa-miR-1271-5p  | 14.819        | 12.511         | 16.403       | 14.174        |
| hsa-miR-561-3p   | 0.554         | 0.412          | 0.540        | 0.447         |
| hsa-miR-301b-3p  | 0.699         | 1.035          | 0.974        | 0.719         |
| hsa-miR-3164     | 0.676         | 0.636          | 0.797        | 0.669         |
| hsa-miR-3622a-5p | 0.619         | 0.720          | 0.903        | 0.372         |
| hsa-miR-302c-5p  | 0.957         | 0.377          | 0.338        | 0.356         |
| hsa-miR-602      | 12.429        | 5.301          | 29.157       | 20.360        |
| hsa-miR-4305     | 0.534         | 0.614          | 0.787        | 0.613         |
| hsa-miR-625-3p   | 5.003         | 3.546          | 3.743        | 5.546         |
| hsa-miR-382-5p   | 2.882         | 2.100          | 2.873        | 2.817         |
| hsa-miR-2053     | 1.819         | 1.246          | 2.375        | 2.198         |
| hsa-miR-3607-5p  | 2.044         | 3.665          | 5.136        | 1.907         |
| hsa-miR-3685     | 0.821         | 0.856          | 1.586        | 1.122         |
| hsa-miR-3133     | 0.791         | 6.700          | 0.868        | 2.395         |
| hsa-miR-4264     | 0.455         | 0.380          | 0.745        | 0.512         |
| hsa-miR-557      | 225.433       | 2.883          | 4.747        | 4.170         |

| miRNA            | sd_LCa    | sd_NTLD  | sd_OD     | sd_Con    |
|------------------|-----------|----------|-----------|-----------|
| hsa-miR-4326     | 4.326     | 2.928    | 4.100     | 3.723     |
| hsa-miR-3180-5p  | 14.961    | 7.749    | 20.708    | 16.471    |
| hsa-miR-363-5p   | 1.157     | 0.958    | 1.063     | 0.905     |
| hsa-miR-1270     | 5.682     | 3.537    | 3.489     | 3.959     |
| hsa-miR-524-3p   | 0.587     | 0.571    | 0.749     | 0.548     |
| hsa-miR-484      | 3288.187  | 2069.289 | 1666.242  | 1861.907  |
| hsa-miR-1193     | 0.320     | 0.285    | 0.335     | 0.283     |
| hsa-miR-34a-3p   | 0.528     | 0.425    | 0.596     | 0.454     |
| hsa-miR-744-3p   | 1.481     | 8.747    | 11.721    | 1.623     |
| hsa-miR-186-3p   | 0.720     | 0.666    | 1.730     | 2.224     |
| hsa-miR-708-3p   | 0.452     | 0.355    | 0.439     | 0.369     |
| hsa-miR-1238-3p  | 57.662    | 30.422   | 137.466   | 79.740    |
| hsa-miR-3180     | 0.345     | 0.321    | 0.328     | 0.307     |
| hsa-miR-1298-5p  | 0.290     | 0.298    | 0.310     | 0.279     |
| hsa-miR-499a-5p  | 0.556     | 0.514    | 0.694     | 0.732     |
| hsa-miR-647      | 0.851     | 0.706    | 1.020     | 0.609     |
| hsa-miR-3622b-5p | 1.071     | 1.061    | 1.253     | 0.770     |
| hsa-miR-556-3p   | 2.208     | 1.452    | 2.375     | 3.369     |
| hsa-miR-3614-5p  | 11.381    | 6.366    | 24.224    | 16.209    |
| hsa-miR-3136-5p  | 0.764     | 0.564    | 0.590     | 0.491     |
| hsa-let-7e-3p    | 0.819     | 0.750    | 7.253     | 1.778     |
| hsa-miR-607      | 0.722     | 0.513    | 0.888     | 0.797     |
| hsa-miR-501-3p   | 41.028    | 20.213   | 23.069    | 24.042    |
| hsa-miR-4290     | 5.012     | 4.377    | 36.309    | 7.619     |
| hsa-miR-129-5p   | 0.443     | 0.473    | 0.528     | 0.413     |
| hsa-miR-451a     | 33927.948 | 5666.273 | 18626.497 | 12439.902 |
| hsa-miR-1914-5p  | 0.523     | 0.489    | 1.800     | 0.726     |
| hsa-miR-191-3p   | 37.324    | 22.139   | 106.626   | 63.538    |
| hsa-miR-634      | 7.652     | 4.141    | 13.090    | 11.378    |
| hsa-miR-1226-3p  | 0.544     | 0.402    | 0.848     | 0.594     |
| hsa-miR-425-3p   | 27.401    | 16.109   | 80.382    | 49.589    |
| hsa-miR-3615     | 2.228     | 1.189    | 1.478     | 1.479     |
| hsa-miR-4310     | 20.051    | 12.360   | 58.600    | 36.207    |
| hsa-miR-339-5p   | 25.930    | 31.956   | 23.084    | 28.339    |
| hsa-miR-526b-5p  | 10.372    | 0.568    | 0.552     | 0.402     |
| hsa-miR-518a-3p  | 0.904     | 0.803    | 3.534     | 1.114     |
| hsa-miR-3144-5p  | 0.423     | 0.410    | 0.484     | 0.368     |
| hsa-miR-642a-5p  | 0.517     | 1.669    | 0.850     | 0.543     |

| <b>miRNA</b>     | <b>sd_LCa</b> | <b>sd_NTLD</b> | <b>sd_OD</b> | <b>sd_Con</b> |
|------------------|---------------|----------------|--------------|---------------|
| hsa-miR-586      | 0.767         | 0.615          | 0.740        | 0.689         |
| hsa-miR-105-3p   | 0.619         | 0.382          | 0.505        | 0.433         |
| hsa-miR-1204     | 0.510         | 0.526          | 6.251        | 0.618         |
| hsa-miR-514a-3p  | 0.467         | 0.363          | 0.352        | 0.312         |
| hsa-miR-3182     | 0.395         | 1.107          | 0.399        | 0.370         |
| hsa-miR-3671     | 0.512         | 0.498          | 0.565        | 0.486         |
| hsa-miR-487a-3p  | 0.965         | 1.251          | 1.239        | 1.778         |
| hsa-miR-298      | 0.520         | 0.641          | 0.531        | 0.367         |
| hsa-miR-3131     | 52.651        | 2.366          | 1.995        | 0.421         |
| hsa-miR-4278     | 0.391         | 0.335          | 0.372        | 0.730         |
| hsa-miR-7-2-3p   | 0.660         | 2.284          | 0.945        | 0.883         |
| hsa-miR-593-3p   | 0.554         | 0.552          | 0.529        | 0.845         |
| hsa-miR-558      | 0.392         | 0.409          | 0.405        | 0.399         |
| hsa-miR-3065-3p  | 0.363         | 0.444          | 0.367        | 0.343         |
| hsa-miR-541-5p   | 0.534         | 0.461          | 0.543        | 0.468         |
| hsa-miR-154-5p   | 8.784         | 14.712         | 15.064       | 7.737         |
| hsa-miR-3683     | 0.397         | 0.416          | 0.735        | 0.391         |
| hsa-miR-369-3p   | 1.096         | 0.797          | 1.286        | 1.573         |
| hsa-miR-508-3p   | 0.402         | 0.363          | 0.377        | 0.350         |
| hsa-miR-198      | 50.190        | 1.507          | 2.715        | 0.903         |
| hsa-miR-485-5p   | 0.478         | 0.455          | 0.421        | 0.433         |
| hsa-miR-3163     | 6.156         | 6.586          | 5.654        | 6.621         |
| hsa-miR-3919     | 0.423         | 0.348          | 0.397        | 0.354         |
| hsa-miR-4283     | 0.389         | 0.349          | 0.336        | 0.321         |
| hsa-miR-27a-5p   | 0.380         | 0.316          | 0.396        | 0.357         |
| hsa-miR-3173-3p  | 0.581         | 0.609          | 0.542        | 0.640         |
| hsa-miR-3196     | 739.652       | 35.180         | 101.660      | 58.883        |
| hsa-miR-500a-5p  | 31.873        | 18.479         | 26.679       | 24.684        |
| hsa-miR-520a-5p  | 0.539         | 0.387          | 0.390        | 0.361         |
| hsa-miR-1254     | 1.103         | 2.454          | 1.098        | 0.762         |
| hsa-miR-4311     | 0.807         | 0.562          | 0.580        | 0.642         |
| hsa-miR-891b     | 0.550         | 0.469          | 0.706        | 0.620         |
| hsa-miR-3150a-3p | 0.342         | 0.314          | 0.329        | 0.312         |
| hsa-miR-99b-3p   | 2.040         | 10.893         | 10.005       | 1.612         |
| hsa-miR-3200-3p  | 16.188        | 13.962         | 15.016       | 16.514        |
| hsa-miR-1827     | 0.667         | 0.865          | 0.675        | 0.797         |
| hsa-miR-941      | 0.311         | 0.270          | 0.309        | 0.288         |
| hsa-miR-599      | 0.453         | 0.395          | 0.474        | 0.423         |

| <b>miRNA</b>     | <b>sd_LCa</b> | <b>sd_NTLD</b> | <b>sd_OD</b> | <b>sd_Con</b> |
|------------------|---------------|----------------|--------------|---------------|
| hsa-miR-493-5p   | 1.408         | 2.084          | 1.547        | 1.955         |
| hsa-miR-3151-5p  | 0.477         | 0.470          | 0.403        | 0.373         |
| hsa-miR-34b-3p   | 21.410        | 59.615         | 3.752        | 9.115         |
| hsa-miR-3943     | 0.582         | 0.914          | 0.691        | 0.577         |
| hsa-miR-644a     | 0.375         | 0.372          | 0.372        | 0.343         |
| hsa-miR-3613-3p  | 7.650         | 5.436          | 22.894       | 17.234        |
| hsa-miR-222-5p   | 0.381         | 0.331          | 0.401        | 0.375         |
| hsa-miR-372-3p   | 0.385         | 0.339          | 0.407        | 0.355         |
| hsa-miR-891a-5p  | 0.506         | 0.753          | 0.516        | 0.431         |
| hsa-miR-3915     | 0.505         | 0.463          | 0.563        | 0.437         |
| hsa-miR-662      | 1.501         | 1.857          | 2.408        | 0.741         |
| hsa-miR-614      | 0.515         | 0.482          | 0.531        | 0.416         |
| hsa-miR-223-5p   | 3.939         | 2.570          | 3.551        | 2.490         |
| hsa-miR-615-3p   | 1.273         | 1.614          | 15.059       | 3.656         |
| hsa-miR-569      | 0.513         | 0.450          | 0.618        | 0.686         |
| hsa-miR-936      | 2.113         | 1.418          | 1.742        | 1.533         |
| hsa-miR-339-3p   | 10.472        | 7.504          | 7.181        | 6.683         |
| hsa-miR-25-3p    | 15050.400     | 9505.188       | 11895.456    | 10617.290     |
| hsa-miR-510-5p   | 0.373         | 0.371          | 0.334        | 0.298         |
| hsa-miR-2116-3p  | 18.246        | 12.043         | 22.090       | 40.872        |
| hsa-miR-942-5p   | 120.159       | 63.822         | 105.186      | 80.560        |
| hsa-miR-937-3p   | 1.521         | 21.339         | 71.744       | 10.413        |
| hsa-miR-1203     | 0.596         | 0.420          | 0.454        | 0.383         |
| hsa-miR-655-3p   | 0.692         | 0.825          | 1.010        | 1.000         |
| hsa-miR-4256     | 0.348         | 0.331          | 0.359        | 0.304         |
| hsa-miR-99a-3p   | 0.406         | 0.406          | 0.617        | 0.393         |
| hsa-miR-1278     | 0.869         | 1.454          | 1.063        | 0.925         |
| hsa-miR-3923     | 0.988         | 0.709          | 1.189        | 0.914         |
| hsa-miR-92a-2-5p | 0.617         | 0.469          | 0.569        | 0.541         |
| hsa-miR-3621     | 0.561         | 0.524          | 1.356        | 0.553         |
| hsa-miR-4300     | 0.382         | 0.407          | 0.369        | 0.330         |
| hsa-miR-548w     | 0.834         | 1.091          | 1.975        | 1.111         |
| hsa-miR-574-5p   | 1310.473      | 253.410        | 367.395      | 523.665       |
| hsa-miR-383-5p   | 0.461         | 1.288          | 0.526        | 0.571         |
| hsa-miR-146b-3p  | 0.462         | 0.423          | 0.492        | 0.440         |
| hsa-miR-433-3p   | 1.206         | 0.860          | 1.013        | 0.832         |
| hsa-miR-421      | 3.036         | 2.108          | 2.748        | 3.013         |
| hsa-miR-576-3p   | 0.846         | 0.564          | 0.724        | 0.576         |

| miRNA            | sd_LCa   | sd_NTLD | sd_OD   | sd_Con  |
|------------------|----------|---------|---------|---------|
| hsa-miR-550a-5p  | 15.347   | 10.423  | 40.267  | 25.718  |
| hsa-miR-548l     | 0.406    | 0.430   | 0.396   | 0.384   |
| hsa-miR-1250-5p  | 0.439    | 0.448   | 0.415   | 0.360   |
| hsa-miR-3667-5p  | 212.112  | 27.497  | 24.773  | 26.696  |
| hsa-miR-135a-5p  | 1.761    | 1.451   | 5.470   | 2.941   |
| hsa-miR-3183     | 2.634    | 0.352   | 0.415   | 0.379   |
| hsa-miR-4267     | 0.379    | 0.314   | 0.330   | 0.298   |
| hsa-miR-4304     | 9.201    | 0.655   | 0.578   | 0.458   |
| hsa-miR-500b-5p  | 29.588   | 21.608  | 16.419  | 17.845  |
| hsa-miR-4317     | 9.697    | 7.949   | 9.794   | 8.669   |
| hsa-miR-455-5p   | 0.509    | 0.511   | 0.475   | 0.830   |
| hsa-miR-92b-5p   | 0.483    | 0.316   | 0.490   | 0.367   |
| hsa-miR-885-3p   | 0.364    | 0.383   | 0.469   | 0.396   |
| hsa-miR-4262     | 0.373    | 0.448   | 0.401   | 0.436   |
| hsa-miR-4301     | 0.566    | 0.443   | 0.606   | 0.620   |
| hsa-miR-296-3p   | 0.335    | 0.330   | 0.324   | 0.325   |
| hsa-miR-215-5p   | 1071.262 | 926.051 | 942.493 | 918.907 |
| hsa-miR-3681-5p  | 0.411    | 0.382   | 0.395   | 0.365   |
| hsa-miR-636      | 3.755    | 4.567   | 5.026   | 6.515   |
| hsa-miR-1279     | 0.818    | 0.753   | 1.256   | 0.844   |
| hsa-miR-597-5p   | 0.421    | 0.422   | 0.481   | 0.421   |
| hsa-miR-877-5p   | 27.324   | 0.496   | 0.474   | 0.428   |
| hsa-miR-4315     | 0.487    | 0.442   | 0.487   | 0.422   |
| hsa-miR-508-5p   | 0.384    | 0.368   | 0.360   | 0.350   |
| hsa-miR-616-3p   | 0.431    | 0.397   | 0.419   | 0.388   |
| hsa-miR-134-5p   | 524.966  | 6.601   | 14.000  | 8.306   |
| hsa-miR-411-5p   | 0.445    | 0.423   | 0.484   | 0.389   |
| hsa-miR-509-3-5p | 0.473    | 0.354   | 0.433   | 0.363   |
| hsa-miR-549a     | 0.458    | 0.468   | 0.479   | 0.422   |
| hsa-miR-518e-3p  | 0.489    | 0.468   | 0.735   | 0.459   |
| hsa-miR-512-5p   | 0.432    | 0.408   | 0.764   | 0.410   |
| hsa-miR-661      | 0.396    | 0.398   | 0.401   | 0.383   |
| hsa-miR-1299     | 23.877   | 14.050  | 14.761  | 18.015  |
| hsa-miR-515-3p   | 1.426    | 1.195   | 6.043   | 1.969   |
| hsa-miR-1287-5p  | 19.377   | 1.820   | 2.541   | 2.120   |
| hsa-miR-3666     | 0.476    | 0.709   | 0.440   | 0.376   |
| hsa-miR-593-5p   | 0.376    | 0.342   | 0.352   | 0.325   |
| hsa-miR-105-5p   | 0.364    | 0.379   | 0.447   | 0.395   |

| <b>miRNA</b>    | <b>sd_LCa</b> | <b>sd_NTLD</b> | <b>sd_OD</b> | <b>sd_Con</b> |
|-----------------|---------------|----------------|--------------|---------------|
| hsa-miR-409-5p  | 2.227         | 1.982          | 2.146        | 2.755         |
| hsa-miR-200b-5p | 0.534         | 0.504          | 0.393        | 0.368         |
| hsa-miR-1468-5p | 0.379         | 0.370          | 0.388        | 0.367         |
| hsa-miR-548k    | 0.491         | 0.496          | 0.524        | 0.412         |
| hsa-miR-187-5p  | 43.625        | 0.352          | 0.420        | 0.422         |
| hsa-miR-938     | 0.502         | 0.718          | 0.387        | 0.348         |
| hsa-miR-1913    | 0.943         | 0.858          | 1.053        | 0.883         |
| hsa-miR-511-5p  | 0.453         | 0.437          | 0.459        | 0.405         |
| hsa-miR-1273a   | 0.576         | 0.388          | 0.554        | 0.444         |
| hsa-miR-4303    | 0.381         | 0.371          | 0.355        | 0.330         |
| hsa-miR-4260    | 0.623         | 0.617          | 0.456        | 0.388         |
| hsa-miR-376a-5p | 3.073         | 5.180          | 3.639        | 3.386         |
| hsa-miR-217     | 0.356         | 0.353          | 0.353        | 0.320         |
| hsa-miR-181a-3p | 9.069         | 9.340          | 8.812        | 6.805         |
| hsa-miR-939-5p  | 103.927       | 72.467         | 95.232       | 54.056        |
| hsa-miR-1200    | 0.381         | 0.432          | 0.568        | 0.422         |
| hsa-miR-345-5p  | 2.280         | 2.917          | 3.705        | 1.443         |
| hsa-miR-3678-3p | 0.354         | 0.456          | 0.326        | 0.275         |
| hsa-miR-99a-5p  | 104.152       | 33.568         | 49.147       | 43.834        |
| hsa-miR-544b    | 0.442         | 0.396          | 0.539        | 0.417         |
| hsa-miR-516a-5p | 0.982         | 0.665          | 0.733        | 0.935         |
| hsa-miR-133b    | 36.186        | 21.223         | 24.944       | 25.618        |
| hsa-miR-3927-3p | 0.488         | 0.379          | 0.497        | 0.469         |
| hsa-miR-412-3p  | 0.355         | 0.337          | 0.423        | 0.362         |
| hsa-miR-1292-5p | 0.514         | 0.400          | 0.613        | 0.566         |
| hsa-miR-10a-3p  | 0.444         | 0.363          | 0.424        | 0.377         |
| hsa-miR-2117    | 0.407         | 0.351          | 0.347        | 0.315         |
| hsa-miR-328-3p  | 37.899        | 44.400         | 265.083      | 61.909        |
| hsa-miR-3908    | 0.486         | 0.391          | 0.489        | 0.591         |
| hsa-miR-3120-3p | 2.001         | 1.952          | 1.959        | 1.903         |
| hsa-miR-4285    | 0.398         | 0.369          | 0.365        | 0.349         |
| hsa-miR-3160-3p | 0.357         | 0.508          | 0.378        | 0.331         |
| hsa-miR-3663-5p | 0.618         | 0.515          | 0.659        | 0.793         |
| hsa-miR-759     | 0.372         | 0.312          | 0.364        | 0.344         |
| hsa-miR-194-5p  | 1165.519      | 781.042        | 929.144      | 669.457       |
| hsa-miR-125b-5p | 514.710       | 298.988        | 323.617      | 336.104       |
| hsa-miR-3192-5p | 0.381         | 0.548          | 0.489        | 0.409         |
| hsa-miR-367-5p  | 0.938         | 0.536          | 0.690        | 0.664         |

| <b>miRNA</b>     | <b>sd_LCa</b> | <b>sd_NTLD</b> | <b>sd_OD</b> | <b>sd_Con</b> |
|------------------|---------------|----------------|--------------|---------------|
| hsa-miR-190b     | 0.839         | 0.687          | 2.082        | 0.980         |
| hsa-miR-579-3p   | 0.466         | 0.484          | 0.538        | 0.460         |
| hsa-miR-3199     | 0.452         | 0.525          | 0.498        | 0.402         |
| hsa-miR-889-3p   | 0.553         | 0.467          | 0.595        | 0.544         |
| hsa-miR-623      | 19.278        | 3.090          | 3.518        | 3.974         |
| hsa-miR-496      | 0.473         | 0.450          | 0.568        | 0.520         |
| hsa-miR-3185     | 0.477         | 0.352          | 0.412        | 0.396         |
| hsa-miR-1197     | 0.764         | 0.431          | 0.616        | 0.427         |
| hsa-miR-211-5p   | 2.817         | 4.503          | 65.239       | 7.971         |
| hsa-miR-767-3p   | 3.797         | 2.542          | 7.480        | 7.002         |
| hsa-miR-591      | 0.488         | 0.551          | 1.156        | 0.454         |
| hsa-miR-2278     | 6.343         | 1.080          | 1.599        | 0.972         |
| hsa-miR-624-3p   | 0.557         | 0.565          | 1.852        | 0.555         |
| hsa-miR-4277     | 0.389         | 0.473          | 0.418        | 0.383         |
| hsa-miR-1911-5p  | 0.378         | 0.357          | 0.378        | 0.322         |
| hsa-miR-346      | 2.018         | 2.356          | 1.945        | 1.569         |
| hsa-miR-216a-5p  | 0.368         | 0.315          | 0.391        | 0.319         |
| hsa-miR-517-5p   | 0.355         | 0.324          | 0.380        | 0.328         |
| hsa-miR-3684     | 0.450         | 0.434          | 5.815        | 0.753         |
| hsa-miR-4261     | 5.642         | 11.012         | 4.910        | 4.956         |
| hsa-miR-490-3p   | 0.615         | 0.358          | 0.486        | 0.384         |
| hsa-miR-196a-3p  | 0.847         | 0.501          | 0.640        | 0.530         |
| hsa-miR-1825     | 33.390        | 29.116         | 98.572       | 59.505        |
| hsa-miR-1469     | 4.352         | 2.082          | 6.562        | 1.036         |
| hsa-miR-3174     | 0.696         | 0.728          | 0.550        | 0.515         |
| hsa-miR-944      | 0.482         | 0.421          | 0.520        | 0.611         |
| hsa-miR-29b-1-5p | 7.054         | 4.516          | 10.539       | 6.314         |
| hsa-miR-488-5p   | 0.575         | 0.453          | 0.615        | 0.480         |
| hsa-miR-302d-5p  | 0.309         | 0.300          | 0.311        | 0.274         |
| hsa-miR-3142     | 0.447         | 0.377          | 0.420        | 0.399         |
| hsa-miR-718      | 166.572       | 3.334          | 7.737        | 0.954         |
| hsa-miR-3680-3p  | 0.879         | 0.882          | 1.366        | 0.686         |
| hsa-miR-1265     | 0.704         | 0.701          | 0.727        | 0.575         |
| hsa-miR-3681-3p  | 1.128         | 0.954          | 1.139        | 0.788         |
| hsa-miR-214-5p   | 0.388         | 0.403          | 0.454        | 0.423         |
| hsa-miR-548t-5p  | 0.864         | 0.757          | 1.459        | 0.899         |
| hsa-miR-1539     | 19.358        | 12.066         | 63.443       | 41.894        |
| hsa-miR-202-5p   | 1.264         | 1.363          | 1.883        | 1.604         |

| miRNA            | sd_LCa  | sd_NTLD | sd_OD   | sd_Con  |
|------------------|---------|---------|---------|---------|
| hsa-miR-519e-3p  | 1.633   | 2.621   | 4.589   | 2.122   |
| hsa-miR-4276     | 0.337   | 0.284   | 0.348   | 0.312   |
| hsa-miR-3153     | 0.376   | 0.314   | 0.347   | 0.327   |
| hsa-miR-3187-3p  | 0.571   | 0.343   | 0.374   | 0.341   |
| hsa-miR-555      | 0.474   | 0.442   | 0.457   | 0.396   |
| hsa-miR-4266     | 0.310   | 0.326   | 0.299   | 0.279   |
| hsa-miR-627-5p   | 39.856  | 43.414  | 36.978  | 45.089  |
| hsa-miR-585-3p   | 0.496   | 0.450   | 0.480   | 0.471   |
| hsa-miR-1293     | 0.431   | 0.355   | 0.411   | 0.387   |
| hsa-miR-34b-5p   | 10.339  | 3.957   | 5.499   | 1.405   |
| hsa-miR-200c-5p  | 0.483   | 0.440   | 0.467   | 0.421   |
| hsa-miR-370-3p   | 2.753   | 6.265   | 9.464   | 1.157   |
| hsa-miR-588      | 0.555   | 0.430   | 0.594   | 0.457   |
| hsa-miR-3149     | 41.284  | 7.656   | 9.766   | 6.655   |
| hsa-miR-513c-5p  | 3.127   | 3.614   | 5.573   | 2.746   |
| hsa-miR-1915-5p  | 16.341  | 0.358   | 0.415   | 0.440   |
| hsa-miR-517a-3p  | 0.926   | 1.291   | 2.149   | 1.119   |
| hsa-miR-1227-3p  | 3.753   | 3.770   | 12.186  | 8.665   |
| hsa-miR-1912     | 0.326   | 0.300   | 0.329   | 0.298   |
| hsa-miR-513b-5p  | 9.288   | 10.446  | 9.766   | 7.817   |
| hsa-miR-18b-3p   | 12.195  | 2.112   | 3.033   | 4.131   |
| hsa-miR-548x-3p  | 1.225   | 2.578   | 1.848   | 2.328   |
| hsa-miR-3678-5p  | 0.455   | 0.360   | 0.488   | 0.391   |
| hsa-miR-4275     | 0.755   | 0.679   | 1.094   | 0.958   |
| hsa-miR-185-3p   | 0.527   | 0.569   | 1.566   | 0.600   |
| hsa-miR-3166     | 0.413   | 0.426   | 0.476   | 0.395   |
| hsa-miR-1184     | 0.401   | 0.502   | 1.390   | 0.469   |
| hsa-miR-374b-3p  | 0.812   | 0.548   | 0.986   | 0.725   |
| hsa-miR-3148     | 12.244  | 3.653   | 2.518   | 2.052   |
| hsa-miR-4308     | 0.473   | 0.499   | 0.763   | 0.752   |
| hsa-miR-548h-5p  | 0.462   | 0.555   | 0.487   | 0.426   |
| hsa-miR-3139     | 0.379   | 0.343   | 0.377   | 0.321   |
| hsa-miR-340-3p   | 129.744 | 148.622 | 156.580 | 125.927 |
| hsa-miR-19a-5p   | 0.529   | 0.437   | 0.486   | 0.461   |
| hsa-miR-449c-5p  | 0.494   | 0.469   | 0.452   | 0.406   |
| hsa-miR-4292     | 0.405   | 0.431   | 0.395   | 0.374   |
| hsa-miR-1205     | 0.389   | 0.358   | 0.398   | 0.382   |
| hsa-miR-19b-2-5p | 0.948   | 0.805   | 1.170   | 0.994   |



| <b>miRNA</b>     | <b>sd_LCa</b> | <b>sd_NTLD</b> | <b>sd_OD</b> | <b>sd_Con</b> |
|------------------|---------------|----------------|--------------|---------------|
| hsa-miR-548b-3p  | 0.960         | 0.868          | 2.834        | 1.599         |
| hsa-miR-3614-3p  | 0.582         | 0.585          | 0.675        | 1.348         |
| hsa-miR-376b-3p  | 0.641         | 0.653          | 0.547        | 0.539         |
| hsa-miR-3144-3p  | 0.709         | 0.593          | 2.214        | 0.835         |
| hsa-miR-543      | 8.714         | 7.099          | 9.549        | 7.161         |
| hsa-miR-30c-2-3p | 2.110         | 0.505          | 0.551        | 0.480         |
| hsa-miR-516a-3p  | 0.523         | 0.449          | 0.581        | 0.437         |
| hsa-miR-631      | 10.224        | 9.844          | 18.343       | 9.156         |
| hsa-miR-1224-3p  | 0.905         | 0.872          | 1.749        | 1.016         |
| hsa-miR-1244     | 0.596         | 1.022          | 1.144        | 0.654         |
| hsa-miR-518c-5p  | 1.131         | 0.412          | 0.427        | 0.320         |
| hsa-miR-548d-5p  | 15.739        | 9.324          | 10.375       | 17.884        |
| hsa-miR-3690     | 0.857         | 0.694          | 0.704        | 0.682         |
| hsa-miR-873-5p   | 0.569         | 0.508          | 0.578        | 0.519         |
| hsa-miR-1291     | 3.280         | 3.266          | 4.901        | 3.521         |
| hsa-miR-221-3p   | 49.782        | 36.577         | 56.444       | 60.912        |
| hsa-miR-4287     | 0.348         | 0.517          | 0.404        | 0.351         |
| hsa-miR-3162-5p  | 1154.839      | 206.283        | 347.157      | 199.455       |
| hsa-miR-3692-3p  | 0.319         | 0.292          | 0.300        | 0.280         |
| hsa-miR-3177-3p  | 0.665         | 0.542          | 0.501        | 0.443         |
| hsa-miR-4297     | 0.667         | 14.773         | 44.533       | 2.154         |
| hsa-miR-3613-5p  | 2.293         | 1.249          | 3.133        | 2.250         |
| hsa-miR-548a-3p  | 0.554         | 0.695          | 0.590        | 0.484         |
| hsa-miR-635      | 0.496         | 0.585          | 0.485        | 0.427         |
| hsa-miR-1228-5p  | 2.148         | 0.993          | 1.305        | 1.519         |
| hsa-miR-331-5p   | 0.461         | 0.477          | 0.492        | 0.594         |
| hsa-miR-1266-5p  | 0.377         | 0.314          | 0.324        | 0.280         |
| hsa-miR-96-3p    | 0.358         | 0.324          | 0.366        | 0.315         |
| hsa-miR-888-3p   | 0.414         | 0.385          | 0.411        | 0.350         |
| hsa-miR-548y     | 1.132         | 6.452          | 8.982        | 1.873         |
| hsa-miR-34c-5p   | 0.444         | 0.361          | 0.446        | 0.614         |
| hsa-miR-367-3p   | 0.634         | 0.446          | 0.910        | 0.539         |
| hsa-miR-23c      | 17.522        | 12.912         | 58.940       | 30.623        |
| hsa-miR-432-5p   | 2.417         | 3.390          | 2.622        | 2.439         |
| hsa-miR-548f-3p  | 2.163         | 8.445          | 1.710        | 5.541         |
| hsa-miR-3622b-3p | 0.824         | 0.691          | 4.452        | 2.054         |
| hsa-miR-567      | 0.444         | 0.376          | 0.423        | 0.399         |
| hsa-miR-541-3p   | 0.440         | 0.403          | 0.427        | 0.370         |

| miRNA            | sd_LCa    | sd_NTLD   | sd_OD     | sd_Con    |
|------------------|-----------|-----------|-----------|-----------|
| hsa-miR-520e     | 1.626     | 1.786     | 2.677     | 1.448     |
| hsa-miR-764      | 1.187     | 1.972     | 31.499    | 3.889     |
| hsa-miR-570-3p   | 0.721     | 0.755     | 0.833     | 1.011     |
| hsa-miR-432-3p   | 0.481     | 0.596     | 5.692     | 0.733     |
| hsa-miR-302b-5p  | 0.563     | 0.466     | 0.565     | 0.619     |
| hsa-miR-3186-5p  | 0.432     | 0.701     | 0.644     | 0.409     |
| hsa-miR-1303     | 0.909     | 1.938     | 2.087     | 0.804     |
| hsa-miR-218-2-3p | 0.787     | 0.673     | 0.542     | 0.589     |
| hsa-miR-192-5p   | 1779.169  | 1603.741  | 1418.494  | 1695.272  |
| hsa-miR-486-5p   | 32237.115 | 22241.100 | 25397.200 | 15528.366 |
| hsa-miR-3689a-5p | 0.403     | 0.397     | 0.441     | 0.379     |
| hsa-miR-4316     | 0.342     | 0.331     | 0.364     | 0.375     |
| hsa-miR-676-3p   | 0.433     | 0.327     | 0.395     | 0.337     |
| hsa-miR-664a-3p  | 131.017   | 71.585    | 85.873    | 77.086    |
| hsa-miR-1236-3p  | 0.795     | 0.910     | 4.934     | 2.384     |
| hsa-miR-522-3p   | 0.801     | 0.830     | 1.504     | 0.993     |
| hsa-miR-23b-5p   | 0.828     | 0.532     | 0.596     | 0.652     |
| hsa-let-7f-1-3p  | 20.236    | 17.298    | 84.285    | 35.748    |
| hsa-miR-518f-5p  | 0.570     | 0.400     | 0.395     | 0.350     |
| hsa-miR-146a-3p  | 0.604     | 0.483     | 0.875     | 0.703     |
| hsa-miR-3689a-3p | 0.450     | 0.627     | 0.569     | 0.491     |
| hsa-miR-4302     | 0.375     | 0.410     | 0.364     | 0.333     |
| hsa-miR-299-5p   | 5.531     | 64.941    | 11.732    | 7.827     |
| hsa-miR-612      | 0.485     | 0.492     | 0.448     | 0.397     |
| hsa-miR-514b-3p  | 0.368     | 0.319     | 0.395     | 0.324     |
| hsa-miR-3612     | 0.416     | 0.314     | 0.412     | 0.358     |
| hsa-miR-3942-5p  | 0.503     | 0.491     | 0.672     | 0.461     |
| hsa-miR-1323     | 1.148     | 1.012     | 0.731     | 0.924     |
| hsa-miR-548v     | 0.847     | 18.272    | 0.895     | 1.784     |
| hsa-miR-4265     | 0.461     | 0.359     | 0.400     | 0.579     |
| hsa-miR-3129-5p  | 0.559     | 0.608     | 0.834     | 0.594     |
| hsa-miR-876-5p   | 0.837     | 0.912     | 1.379     | 0.862     |
| hsa-miR-149-5p   | 19.477    | 11.386    | 45.036    | 33.984    |
| hsa-miR-1258     | 0.397     | 0.405     | 0.449     | 0.364     |
| hsa-miR-548m     | 1.596     | 1.396     | 4.242     | 2.800     |
| hsa-miR-302a-3p  | 1.707     | 1.485     | 6.111     | 2.153     |
| hsa-miR-185-5p   | 8071.618  | 4231.138  | 5882.274  | 5548.528  |
| hsa-let-7b-3p    | 22.119    | 69.978    | 177.963   | 44.240    |

| <b>miRNA</b>      | <b>sd_LCa</b> | <b>sd_NTLD</b> | <b>sd_OD</b> | <b>sd_Con</b> |
|-------------------|---------------|----------------|--------------|---------------|
| hsa-miR-548n      | 0.930         | 1.404          | 1.196        | 2.468         |
| hsa-miR-323a-5p   | 0.386         | 0.388          | 0.376        | 0.316         |
| hsa-miR-548aa     | 10.727        | 23.351         | 3.627        | 8.594         |
| hsa-miR-4296      | 0.811         | 0.503          | 0.509        | 0.508         |
| hsa-miR-29a-5p    | 1.504         | 6.593          | 4.699        | 2.599         |
| hsa-miR-645       | 0.434         | 0.422          | 0.458        | 0.449         |
| hsa-miR-519b-3p   | 0.902         | 0.555          | 1.099        | 0.791         |
| hsa-miR-1267      | 5.776         | 5.041          | 13.232       | 13.502        |
| hsa-miR-4330      | 0.433         | 0.363          | 0.448        | 0.375         |
| hsa-miR-653-5p    | 0.562         | 0.421          | 0.491        | 0.454         |
| hsa-miR-493-3p    | 0.625         | 0.600          | 0.506        | 0.475         |
| hsa-miR-4288      | 0.429         | 0.397          | 0.453        | 0.387         |
| hsa-miR-204-5p    | 1228.333      | 23.684         | 107.949      | 12.056        |
| hsa-miR-380-5p    | 0.424         | 0.383          | 0.387        | 0.373         |
| hsa-miR-3692-5p   | 0.974         | 1.111          | 1.043        | 0.672         |
| hsa-miR-34c-3p    | 0.555         | 0.519          | 0.489        | 0.478         |
| hsa-miR-200a-5p   | 0.510         | 0.484          | 0.467        | 0.440         |
| hsa-miR-499a-3p   | 0.500         | 0.385          | 0.437        | 0.380         |
| hsa-miR-449b-5p   | 0.581         | 0.461          | 0.642        | 0.767         |
| hsa-miR-218-1-3p  | 0.377         | 0.331          | 0.343        | 0.326         |
| hsa-miR-196a-5p   | 4.538         | 8.354          | 6.101        | 2.147         |
| hsa-miR-658       | 0.543         | 0.504          | 0.573        | 0.500         |
| hsa-miR-4321      | 0.599         | 0.609          | 0.794        | 0.674         |
| hsa-miR-125b-2-3p | 0.519         | 0.512          | 0.541        | 0.410         |
| hsa-miR-4295      | 0.578         | 0.514          | 0.503        | 0.413         |
| hsa-miR-609       | 1.119         | 1.228          | 2.149        | 1.079         |
| hsa-miR-199a-5p   | 228.723       | 148.874        | 144.628      | 123.736       |
| hsa-miR-30a-3p    | 130.768       | 1.374          | 1.492        | 1.320         |
| hsa-miR-1269a     | 0.339         | 0.317          | 0.347        | 0.304         |
| hsa-miR-582-3p    | 0.544         | 1.011          | 0.511        | 0.473         |
| hsa-miR-520a-3p   | 1.969         | 1.586          | 6.849        | 2.644         |
| hsa-miR-4263      | 0.409         | 0.387          | 0.406        | 0.376         |
| hsa-miR-592       | 0.467         | 0.970          | 0.525        | 0.449         |
| hsa-miR-206       | 1.007         | 0.586          | 0.589        | 0.559         |
| hsa-miR-4279      | 0.902         | 0.663          | 1.523        | 0.705         |
| hsa-miR-581       | 0.506         | 0.404          | 0.468        | 0.413         |
| hsa-miR-553       | 0.765         | 0.671          | 0.932        | 0.727         |
| hsa-miR-130b-5p   | 4.452         | 4.518          | 5.095        | 5.302         |

| <b>miRNA</b>    | <b>sd_LCa</b> | <b>sd_NTLD</b> | <b>sd_OD</b> | <b>sd_Con</b> |
|-----------------|---------------|----------------|--------------|---------------|
| hsa-miR-325     | 0.484         | 0.381          | 0.416        | 0.391         |
| hsa-miR-302e    | 0.490         | 0.456          | 0.510        | 0.429         |
| hsa-miR-663b    | 0.462         | 0.341          | 0.398        | 0.365         |
| hsa-miR-3169    | 0.367         | 0.325          | 0.349        | 0.303         |
| hsa-miR-4325    | 0.425         | 0.403          | 0.377        | 0.328         |
| hsa-miR-769-3p  | 2.272         | 0.882          | 1.458        | 1.558         |
| hsa-miR-504-5p  | 0.506         | 0.743          | 0.532        | 0.575         |
| hsa-miR-3620-3p | 15.329        | 10.656         | 15.412       | 15.517        |
| hsa-miR-130a-5p | 0.606         | 25.066         | 12.552       | 6.048         |
| hsa-miR-3181    | 1.094         | 0.321          | 0.328        | 0.366         |
| hsa-miR-182-3p  | 0.522         | 0.463          | 0.519        | 0.487         |
| hsa-miR-1185-5p | 0.671         | 0.604          | 1.021        | 0.574         |
| hsa-miR-3691-5p | 0.385         | 0.368          | 0.414        | 0.370         |
| hsa-miR-507     | 0.468         | 0.359          | 0.540        | 0.406         |
| hsa-miR-613     | 1.109         | 18.976         | 115.038      | 6.551         |
| hsa-miR-3935    | 13.835        | 36.489         | 18.982       | 25.227        |
| hsa-miR-520d-3p | 2.057         | 36.691         | 33.467       | 2.857         |
| hsa-miR-518d-3p | 0.895         | 1.068          | 1.563        | 0.772         |
| hsa-miR-455-3p  | 5.457         | 0.374          | 0.440        | 0.372         |
| hsa-miR-1470    | 4.441         | 5.484          | 9.947        | 9.581         |
| hsa-miR-136-3p  | 0.673         | 0.515          | 0.682        | 0.523         |
| hsa-miR-525-3p  | 0.679         | 0.663          | 0.776        | 0.576         |
| hsa-miR-767-5p  | 0.443         | 0.498          | 0.519        | 0.422         |
| hsa-miR-4306    | 14660.433     | 7971.349       | 9653.454     | 9953.549      |
| hsa-miR-626     | 0.533         | 0.430          | 0.519        | 0.432         |
| hsa-miR-33a-5p  | 0.520         | 0.427          | 0.530        | 0.447         |
| hsa-miR-302d-3p | 0.611         | 0.498          | 1.322        | 0.573         |
| hsa-miR-135b-5p | 2.164         | 1.595          | 5.756        | 4.410         |
| hsa-let-7e-5p   | 257.029       | 16.850         | 12.136       | 13.382        |
| hsa-miR-3661    | 0.451         | 0.313          | 0.346        | 0.346         |
| hsa-miR-492     | 0.430         | 0.378          | 0.456        | 0.379         |
| hsa-miR-548b-5p | 1.140         | 1.502          | 2.306        | 1.737         |
| hsa-miR-875-5p  | 0.898         | 3.728          | 1.311        | 1.296         |
| hsa-miR-608     | 0.329         | 0.323          | 0.343        | 0.335         |
| hsa-miR-335-3p  | 10.075        | 242.735        | 174.410      | 25.672        |
| hsa-miR-3159    | 0.326         | 0.461          | 0.363        | 0.321         |
| hsa-miR-196b-3p | 0.460         | 2.376          | 13.930       | 3.192         |
| hsa-miR-3119    | 0.500         | 0.456          | 0.538        | 0.471         |

| <b>miRNA</b>    | <b>sd_LCa</b> | <b>sd_NTLD</b> | <b>sd_OD</b> | <b>sd_Con</b> |
|-----------------|---------------|----------------|--------------|---------------|
| hsa-miR-605-5p  | 1.818         | 9.838          | 53.227       | 5.804         |
| hsa-miR-3650    | 0.457         | 1.346          | 3.733        | 0.441         |
| hsa-miR-885-5p  | 4.670         | 447.121        | 524.154      | 43.549        |
| hsa-miR-1324    | 0.608         | 0.559          | 0.739        | 0.609         |
| hsa-miR-675-5p  | 0.303         | 0.275          | 0.297        | 0.274         |
| hsa-miR-4309    | 0.370         | 0.319          | 0.341        | 0.296         |
| hsa-miR-4307    | 1.977         | 2.283          | 7.773        | 3.376         |
| hsa-miR-302b-3p | 1.299         | 1.330          | 2.960        | 1.054         |
| hsa-miR-517c-3p | 0.683         | 0.473          | 0.769        | 0.536         |
| hsa-miR-2277-3p | 3.728         | 2.791          | 7.963        | 3.166         |
| hsa-miR-3662    | 0.471         | 0.434          | 0.459        | 0.459         |
| hsa-miR-552-3p  | 0.437         | 0.506          | 0.541        | 0.465         |
| hsa-miR-3191-3p | 0.309         | 0.290          | 0.286        | 0.274         |
| hsa-miR-600     | 0.398         | 0.334          | 0.383        | 0.353         |
| hsa-miR-1294    | 0.946         | 4.260          | 3.921        | 1.094         |
| hsa-miR-497-3p  | 0.406         | 0.360          | 0.410        | 0.368         |
| hsa-miR-149-3p  | 2.332         | 0.667          | 0.850        | 0.572         |
| hsa-miR-548u    | 0.845         | 0.910          | 0.893        | 0.612         |
| hsa-miR-136-5p  | 1.941         | 1.646          | 4.496        | 4.084         |
| hsa-miR-521     | 1.196         | 6.108          | 28.925       | 1.833         |
| hsa-miR-4273    | 0.356         | 0.376          | 0.350        | 0.329         |
| hsa-miR-143-5p  | 0.499         | 0.429          | 2.352        | 0.427         |
| hsa-miR-595     | 18.848        | 83.259         | 90.907       | 16.990        |
| hsa-miR-490-5p  | 0.701         | 0.488          | 0.859        | 0.592         |
| hsa-miR-2277-5p | 0.421         | 0.364          | 0.375        | 0.385         |
| hsa-miR-32-3p   | 41.712        | 4.805          | 7.942        | 3.977         |
| hsa-miR-302a-5p | 0.519         | 0.452          | 0.514        | 0.513         |
| hsa-miR-449a    | 1.050         | 0.926          | 1.808        | 1.531         |
| hsa-miR-596     | 0.558         | 0.398          | 0.480        | 0.397         |
| hsa-miR-671-3p  | 1.661         | 1.627          | 2.543        | 2.174         |
| hsa-miR-3158-3p | 0.508         | 0.456          | 0.599        | 0.463         |
| hsa-miR-483-3p  | 11.874        | 13.124         | 187.578      | 14.788        |
| hsa-miR-520f-3p | 1.481         | 1.038          | 2.582        | 1.966         |
| hsa-miR-302c-3p | 0.938         | 1.020          | 2.493        | 1.015         |
| hsa-miR-887-3p  | 2.730         | 1.180          | 1.250        | 0.672         |
| hsa-miR-526b-3p | 1.054         | 0.951          | 2.069        | 0.951         |
| hsa-miR-1909-5p | 9.300         | 12.930         | 36.312       | 18.780        |
| hsa-miR-3688-3p | 1.203         | 2.214          | 1.252        | 1.085         |

| <b>miRNA</b>    | <b>sd_LCa</b> | <b>sd_NTLD</b> | <b>sd_OD</b> | <b>sd_Con</b> |
|-----------------|---------------|----------------|--------------|---------------|
| hsa-miR-488-3p  | 0.514         | 0.488          | 0.561        | 0.648         |
| hsa-miR-4319    | 0.759         | 0.570          | 0.525        | 0.549         |
| hsa-miR-200b-3p | 171.913       | 1.311          | 1.230        | 1.221         |
| hsa-miR-580-3p  | 0.482         | 0.475          | 0.644        | 0.462         |
| hsa-miR-203a-3p | 2.800         | 1.611          | 0.542        | 1.044         |
| hsa-miR-3619-5p | 0.336         | 0.358          | 0.367        | 0.340         |
| hsa-miR-3126-3p | 0.423         | 0.414          | 0.426        | 0.423         |
| hsa-miR-1251-5p | 0.351         | 0.314          | 0.336        | 0.332         |
| hsa-miR-1256    | 0.664         | 0.633          | 0.727        | 0.590         |
| hsa-miR-943     | 0.693         | 0.548          | 1.197        | 0.560         |
| hsa-miR-3687    | 0.439         | 0.497          | 0.334        | 0.301         |
| hsa-miR-3657    | 0.604         | 0.731          | 1.240        | 0.560         |
| hsa-miR-554     | 0.514         | 0.411          | 0.447        | 0.453         |
| hsa-miR-573     | 0.427         | 0.357          | 0.442        | 0.417         |
| hsa-miR-422a    | 0.754         | 0.550          | 1.085        | 0.484         |
| hsa-miR-95-3p   | 6.655         | 0.526          | 0.543        | 0.540         |
| hsa-miR-302f    | 0.695         | 0.503          | 0.773        | 0.498         |
| hsa-miR-25-5p   | 0.648         | 0.558          | 0.587        | 0.637         |
| hsa-miR-544a    | 1.496         | 0.891          | 1.270        | 0.984         |
| hsa-miR-122-5p  | 23.218        | 4.632          | 65.508       | 5.515         |
| hsa-miR-3664-5p | 0.409         | 0.371          | 0.419        | 0.372         |
| hsa-miR-3649    | 0.347         | 0.302          | 0.378        | 0.311         |
| hsa-miR-3171    | 1.063         | 1.599          | 1.331        | 2.102         |
| hsa-miR-224-3p  | 0.516         | 0.459          | 0.583        | 0.462         |
| hsa-miR-148a-5p | 1.002         | 0.779          | 0.680        | 0.593         |
| hsa-miR-1296-5p | 4.084         | 18.121         | 75.647       | 8.854         |
| hsa-miR-3680-5p | 0.366         | 0.351          | 0.430        | 0.361         |
| hsa-miR-640     | 0.875         | 7.667          | 14.458       | 2.914         |
| hsa-miR-3939    | 0.520         | 0.589          | 0.537        | 0.510         |
| hsa-miR-3178    | 0.740         | 0.321          | 0.328        | 0.326         |
| hsa-miR-33b-5p  | 0.503         | 0.467          | 1.158        | 0.455         |
| hsa-miR-218-5p  | 6.377         | 9.663          | 10.892       | 13.025        |
| hsa-miR-3165    | 0.446         | 0.455          | 0.464        | 0.401         |
| hsa-miR-632     | 0.462         | 0.428          | 0.687        | 0.426         |
| hsa-miR-589-5p  | 0.434         | 0.380          | 0.408        | 0.363         |
| hsa-miR-1178-3p | 0.687         | 0.555          | 1.156        | 1.161         |
| hsa-miR-551a    | 0.540         | 0.478          | 0.621        | 0.563         |
| hsa-miR-616-5p  | 0.587         | 0.431          | 0.538        | 0.432         |

| <b>miRNA</b>     | <b>sd_LCa</b> | <b>sd_NTLD</b> | <b>sd_OD</b> | <b>sd_Con</b> |
|------------------|---------------|----------------|--------------|---------------|
| hsa-miR-425-5p   | 11173.366     | 7272.293       | 5594.446     | 5556.309      |
| hsa-miR-2909     | 0.551         | 0.516          | 0.578        | 0.491         |
| hsa-miR-2113     | 0.541         | 0.591          | 3.821        | 0.500         |
| hsa-miR-3912-3p  | 0.517         | 0.504          | 0.546        | 0.451         |
| hsa-miR-548i     | 0.508         | 0.568          | 0.479        | 0.593         |
| hsa-miR-3170     | 1.106         | 2.549          | 5.271        | 3.561         |
| hsa-miR-195-3p   | 5.500         | 7.558          | 8.461        | 8.309         |
| hsa-miR-124-3p   | 0.859         | 0.976          | 9.370        | 0.339         |
| hsa-miR-26a-2-3p | 2.013         | 3.783          | 2.715        | 2.334         |
| hsa-miR-373-3p   | 0.578         | 9.536          | 0.692        | 0.569         |
| hsa-miR-4329     | 0.424         | 1.997          | 3.260        | 0.741         |
| hsa-miR-2355-3p  | 0.441         | 0.412          | 0.540        | 0.421         |
| hsa-miR-520c-3p  | 1.241         | 1.174          | 3.742        | 1.151         |
| hsa-miR-519d-3p  | 1.718         | 1.542          | 2.643        | 2.134         |
| hsa-let-7f-2-3p  | 1.463         | 1.200          | 2.772        | 2.543         |
| hsa-miR-4312     | 8.467         | 44.214         | 44.694       | 20.115        |
| hsa-miR-33a-3p   | 0.713         | 1.040          | 0.604        | 0.572         |
| hsa-miR-27b-5p   | 0.397         | 0.343          | 0.357        | 0.330         |
| hsa-miR-3646     | 24.850        | 27.102         | 20.649       | 30.803        |
| hsa-miR-1179     | 0.635         | 0.817          | 0.812        | 0.748         |
| hsa-miR-618      | 0.571         | 0.448          | 2.153        | 0.513         |
| hsa-miR-2114-5p  | 0.320         | 0.309          | 0.328        | 0.301         |
| hsa-miR-657      | 0.641         | 0.556          | 0.972        | 0.623         |
| hsa-miR-523-3p   | 0.353         | 0.340          | 0.343        | 0.320         |
| hsa-miR-3143     | 0.485         | 0.413          | 0.433        | 0.395         |
| hsa-miR-3913-5p  | 0.455         | 0.339          | 0.379        | 0.355         |
| hsa-miR-205-3p   | 0.649         | 0.558          | 0.437        | 0.469         |
| hsa-miR-603      | 0.529         | 0.561          | 0.631        | 0.492         |
| hsa-miR-619-3p   | 0.455         | 0.485          | 0.989        | 0.472         |
| hsa-miR-330-5p   | 0.589         | 0.495          | 0.567        | 0.469         |
| hsa-miR-4268     | 0.327         | 0.320          | 0.349        | 0.341         |
| hsa-miR-519c-3p  | 0.761         | 0.697          | 1.025        | 0.647         |
| hsa-miR-578      | 0.453         | 0.458          | 0.487        | 0.433         |
| hsa-miR-100-5p   | 632.072       | 425.158        | 609.721      | 563.817       |
| hsa-miR-548a-5p  | 0.941         | 1.420          | 1.060        | 1.387         |
| hsa-miR-3938     | 69.032        | 0.374          | 0.388        | 0.409         |
| hsa-miR-520g-3p  | 1.535         | 3.094          | 4.933        | 1.865         |
| hsa-miR-3922-3p  | 0.897         | 2.690          | 1.778        | 0.994         |

| <b>miRNA</b>     | <b>sd_LCa</b> | <b>sd_NTLD</b> | <b>sd_OD</b> | <b>sd_Con</b> |
|------------------|---------------|----------------|--------------|---------------|
| hsa-miR-1253     | 0.432         | 0.501          | 0.388        | 0.381         |
| hsa-miR-4294     | 0.793         | 0.623          | 0.839        | 0.523         |
| hsa-miR-520b     | 1.888         | 0.819          | 2.475        | 1.064         |
| hsa-miR-649      | 0.476         | 0.426          | 0.439        | 0.415         |
| hsa-miR-1257     | 0.420         | 0.463          | 0.430        | 0.387         |
| hsa-miR-648      | 0.613         | 0.685          | 0.596        | 0.443         |
| hsa-miR-562      | 0.484         | 0.446          | 0.764        | 0.511         |
| hsa-miR-3921     | 0.424         | 0.594          | 7.183        | 0.790         |
| hsa-miR-676-5p   | 0.371         | 0.328          | 0.399        | 0.346         |
| hsa-miR-1538     | 1.237         | 0.789          | 6.318        | 1.355         |
| hsa-miR-1243     | 0.465         | 2.039          | 0.448        | 0.480         |
| hsa-miR-924      | 0.883         | 24.040         | 2.694        | 1.337         |
| hsa-miR-4320     | 0.489         | 0.440          | 0.572        | 0.484         |
| hsa-miR-3714     | 1.169         | 1.756          | 2.188        | 2.333         |
| hsa-miR-16-1-3p  | 1.468         | 1.574          | 2.121        | 6.129         |
| hsa-miR-651-5p   | 0.408         | 0.425          | 0.491        | 0.461         |
| hsa-miR-3145-3p  | 0.504         | 0.784          | 0.646        | 0.479         |
| hsa-miR-621      | 0.357         | 0.347          | 0.371        | 0.362         |
| hsa-miR-3689b-3p | 0.502         | 5.939          | 0.562        | 0.533         |
| hsa-miR-1306-3p  | 4.116         | 2.944          | 16.290       | 5.959         |
| hsa-miR-3622a-3p | 1.091         | 1.046          | 25.413       | 1.901         |
| hsa-miR-3670     | 0.691         | 0.637          | 0.716        | 0.562         |
| hsa-miR-371a-3p  | 3.236         | 0.904          | 6.291        | 1.443         |
| hsa-miR-1264     | 1.024         | 4.064          | 2.920        | 2.572         |
| hsa-miR-147a     | 0.405         | 0.380          | 0.404        | 0.369         |
| hsa-miR-670-5p   | 4.282         | 14.316         | 2.138        | 1.566         |
| hsa-miR-429      | 10.369        | 0.332          | 0.426        | 0.380         |
| hsa-miR-200a-3p  | 40.243        | 2.224          | 0.499        | 0.460         |
| hsa-miR-3675-5p  | 0.395         | 0.361          | 0.404        | 0.361         |
| hsa-miR-3674     | 0.307         | 0.308          | 0.346        | 0.289         |
| hsa-miR-518c-3p  | 0.956         | 0.847          | 0.920        | 0.688         |
| hsa-miR-506-3p   | 0.471         | 0.413          | 0.762        | 0.480         |
| hsa-miR-194-3p   | 0.510         | 0.412          | 0.992        | 0.551         |
| hsa-miR-489-3p   | 0.798         | 0.753          | 0.657        | 0.498         |



**eTable 4. Result Metrics for the Comparison of Lung Cancer Cases Versus All Other Participants in the Study**

| miRNA           | ttest_rawp | ttest_adjp | AUC   | fold_change |
|-----------------|------------|------------|-------|-------------|
| hsa-miR-374c-5p | 2.06E-82   | 2.44E-79   | 0.745 | 0.524       |
| hsa-miR-126-5p  | 2.75E-71   | 1.63E-68   | 0.730 | 0.650       |
| hsa-miR-101-5p  | 5.71E-64   | 2.25E-61   | 0.671 | 0.745       |
| hsa-miR-374a-5p | 3.50E-60   | 1.03E-57   | 0.723 | 0.489       |
| hsa-miR-660-5p  | 5.37E-58   | 1.27E-55   | 0.745 | 0.604       |
| hsa-miR-18b-5p  | 1.28E-54   | 2.52E-52   | 0.711 | 0.591       |
| hsa-miR-374b-5p | 1.92E-54   | 3.25E-52   | 0.729 | 0.543       |
| hsa-miR-18a-5p  | 1.84E-53   | 2.73E-51   | 0.705 | 0.546       |
| hsa-miR-140-5p  | 2.51E-53   | 3.30E-51   | 0.715 | 0.631       |
| hsa-let-7i-3p   | 1.07E-52   | 1.27E-50   | 0.684 | 0.943       |
| hsa-miR-320c    | 4.42E-52   | 4.75E-50   | 0.706 | 1.675       |
| hsa-miR-15a-5p  | 1.67E-50   | 1.65E-48   | 0.710 | 0.624       |
| hsa-miR-590-5p  | 1.15E-49   | 1.04E-47   | 0.690 | 0.570       |
| hsa-miR-144-5p  | 5.91E-49   | 4.99E-47   | 0.699 | 0.616       |
| hsa-miR-320d    | 2.81E-48   | 2.22E-46   | 0.730 | 1.727       |
| hsa-miR-126-3p  | 2.32E-47   | 1.72E-45   | 0.682 | 0.666       |
| hsa-miR-320e    | 2.18E-46   | 1.52E-44   | 0.726 | 1.686       |
| hsa-miR-575     | 5.08E-45   | 3.34E-43   | 0.708 | 1.582       |
| hsa-miR-378b    | 3.29E-44   | 2.05E-42   | 0.731 | 1.349       |
| hsa-miR-145-5p  | 4.34E-44   | 2.57E-42   | 0.705 | 1.665       |
| hsa-miR-598-3p  | 1.54E-42   | 8.65E-41   | 0.669 | 0.825       |
| hsa-miR-1260a   | 1.55E-41   | 8.36E-40   | 0.690 | 2.233       |
| hsa-miR-4289    | 5.74E-41   | 2.95E-39   | 0.675 | 0.969       |
| hsa-miR-101-3p  | 7.24E-41   | 3.57E-39   | 0.680 | 0.601       |
| hsa-miR-20a-5p  | 2.37E-40   | 1.12E-38   | 0.683 | 0.682       |
| hsa-miR-17-5p   | 4.46E-40   | 2.03E-38   | 0.672 | 0.707       |
| hsa-miR-195-5p  | 1.54E-39   | 6.76E-38   | 0.674 | 0.630       |
| hsa-miR-96-5p   | 1.88E-39   | 7.96E-38   | 0.667 | 0.687       |
| hsa-miR-106b-5p | 1.96E-39   | 7.98E-38   | 0.705 | 0.654       |
| hsa-miR-320b    | 3.20E-39   | 1.26E-37   | 0.690 | 1.564       |
| hsa-miR-20b-5p  | 9.16E-39   | 3.49E-37   | 0.672 | 0.714       |
| hsa-miR-548e-3p | 1.73E-38   | 6.40E-37   | 0.639 | 0.896       |
| hsa-miR-16-5p   | 3.28E-38   | 1.18E-36   | 0.673 | 0.723       |
| hsa-miR-4281    | 3.17E-37   | 1.10E-35   | 0.695 | 5.338       |
| hsa-miR-1260b   | 6.09E-37   | 2.06E-35   | 0.688 | 2.387       |
| hsa-miR-629-3p  | 1.27E-35   | 4.16E-34   | 0.677 | 1.273       |
| hsa-miR-624-5p  | 1.41E-35   | 4.50E-34   | 0.664 | 0.710       |
| hsa-miR-505-3p  | 2.97E-35   | 9.23E-34   | 0.689 | 1.513       |
| hsa-miR-196b-5p | 1.15E-34   | 3.49E-33   | 0.674 | 0.773       |
| hsa-miR-148a-3p | 1.49E-34   | 4.42E-33   | 0.675 | 0.651       |
| hsa-miR-320a    | 4.10E-34   | 1.18E-32   | 0.654 | 1.529       |
| hsa-miR-193a-5p | 5.82E-34   | 1.64E-32   | 0.662 | 1.260       |
| hsa-miR-197-3p  | 1.32E-33   | 3.62E-32   | 0.676 | 1.471       |
| hsa-miR-181b-5p | 1.87E-33   | 5.02E-32   | 0.670 | 1.318       |

| <b>miRNA</b>    | <b>ttest_rawp</b> | <b>ttest_adjp</b> | <b>AUC</b> | <b>fold_change</b> |
|-----------------|-------------------|-------------------|------------|--------------------|
| hsa-miR-3607-3p | 1.42E-32          | 3.74E-31          | 0.620      | 0.897              |
| hsa-miR-21-5p   | 1.63E-32          | 4.20E-31          | 0.665      | 0.742              |
| hsa-miR-23a-5p  | 5.35E-32          | 1.35E-30          | 0.690      | 1.087              |
| hsa-miR-454-3p  | 2.02E-31          | 4.97E-30          | 0.661      | 0.691              |
| hsa-miR-502-5p  | 2.42E-31          | 5.84E-30          | 0.662      | 0.755              |
| hsa-miR-940     | 6.48E-31          | 1.53E-29          | 0.695      | 2.362              |
| hsa-miR-181a-5p | 7.99E-31          | 1.85E-29          | 0.657      | 1.456              |
| hsa-miR-450a-5p | 1.29E-30          | 2.92E-29          | 0.660      | 0.889              |
| hsa-miR-26b-5p  | 1.34E-30          | 2.98E-29          | 0.655      | 0.674              |
| hsa-miR-363-3p  | 1.67E-30          | 3.65E-29          | 0.650      | 0.729              |
| hsa-miR-424-5p  | 3.84E-30          | 8.25E-29          | 0.655      | 0.692              |
| hsa-miR-376c-3p | 4.07E-30          | 8.60E-29          | 0.617      | 0.777              |
| hsa-miR-584-5p  | 4.51E-30          | 9.36E-29          | 0.661      | 1.410              |
| hsa-miR-3074-3p | 4.89E-30          | 9.98E-29          | 0.644      | 0.930              |
| hsa-miR-625-5p  | 7.69E-30          | 1.54E-28          | 0.694      | 1.509              |
| hsa-miR-301a-3p | 3.02E-29          | 5.95E-28          | 0.659      | 0.694              |
| hsa-miR-130a-3p | 4.75E-29          | 9.21E-28          | 0.647      | 0.758              |
| hsa-miR-1290    | 4.83E-29          | 9.21E-28          | 0.674      | 1.319              |
| hsa-miR-27a-3p  | 5.94E-29          | 1.12E-27          | 0.655      | 0.815              |
| hsa-miR-3127-5p | 6.41E-29          | 1.19E-27          | 0.658      | 1.353              |
| hsa-miR-7-5p    | 9.71E-29          | 1.77E-27          | 0.658      | 0.685              |
| hsa-miR-3198    | 1.57E-28          | 2.81E-27          | 0.659      | 1.468              |
| hsa-miR-19a-3p  | 2.01E-28          | 3.54E-27          | 0.668      | 0.651              |
| hsa-miR-148b-5p | 2.23E-28          | 3.87E-27          | 0.622      | 0.865              |
| hsa-miR-3138    | 6.48E-28          | 1.11E-26          | 0.721      | 2.333              |
| hsa-miR-551b-3p | 7.08E-28          | 1.20E-26          | 0.673      | 0.935              |
| hsa-miR-154-3p  | 8.03E-28          | 1.34E-26          | 0.636      | 0.960              |
| hsa-miR-3156-5p | 1.36E-27          | 2.23E-26          | 0.659      | 1.270              |
| hsa-miR-15a-3p  | 1.49E-27          | 2.41E-26          | 0.650      | 0.881              |
| hsa-miR-369-5p  | 1.65E-27          | 2.63E-26          | 0.641      | 0.909              |
| hsa-miR-99b-5p  | 4.91E-27          | 7.75E-26          | 0.645      | 1.476              |
| hsa-miR-665     | 7.26E-27          | 1.13E-25          | 0.639      | 1.293              |
| hsa-miR-1285-3p | 1.32E-26          | 2.02E-25          | 0.690      | 1.345              |
| hsa-miR-103a-3p | 2.05E-26          | 3.12E-25          | 0.630      | 0.812              |
| hsa-miR-4291    | 3.76E-26          | 5.63E-25          | 0.647      | 0.794              |
| hsa-miR-31-5p   | 1.01E-25          | 1.50E-24          | 0.636      | 0.939              |
| hsa-miR-20a-3p  | 1.25E-25          | 1.83E-24          | 0.642      | 0.828              |
| hsa-miR-3141    | 1.37E-25          | 1.98E-24          | 0.675      | 4.562              |
| hsa-miR-874-3p  | 1.59E-25          | 2.27E-24          | 0.654      | 1.308              |
| hsa-miR-22-3p   | 3.24E-25          | 4.56E-24          | 0.690      | 1.248              |
| hsa-miR-324-3p  | 4.54E-25          | 6.32E-24          | 0.673      | 1.380              |
| hsa-miR-539-5p  | 5.85E-25          | 8.04E-24          | 0.663      | 0.935              |
| hsa-miR-330-3p  | 1.16E-24          | 1.58E-23          | 0.637      | 1.268              |
| hsa-miR-30d-5p  | 1.67E-24          | 2.25E-23          | 0.626      | 1.621              |
| hsa-miR-495-3p  | 1.91E-23          | 2.53E-22          | 0.614      | 0.750              |
| hsa-miR-3679-5p | 3.36E-23          | 4.42E-22          | 0.655      | 3.098              |

| <b>miRNA</b>     | <b>ttest_rawp</b> | <b>ttest_adjp</b> | <b>AUC</b> | <b>fold_change</b> |
|------------------|-------------------|-------------------|------------|--------------------|
| hsa-miR-362-3p   | 5.65E-23          | 7.35E-22          | 0.634      | 0.721              |
| hsa-miR-152-3p   | 8.48E-23          | 1.09E-21          | 0.625      | 0.857              |
| hsa-miR-1305     | 9.85E-23          | 1.25E-21          | 0.644      | 1.295              |
| hsa-miR-15b-3p   | 1.31E-22          | 1.65E-21          | 0.603      | 0.733              |
| hsa-let-7i-5p    | 2.49E-22          | 3.10E-21          | 0.617      | 0.816              |
| hsa-miR-26a-1-3p | 2.75E-22          | 3.38E-21          | 0.612      | 0.916              |
| hsa-miR-1252-5p  | 3.99E-22          | 4.87E-21          | 0.635      | 1.034              |
| hsa-miR-3125     | 4.11E-22          | 4.96E-21          | 0.638      | 1.264              |
| hsa-miR-921      | 5.59E-22          | 6.67E-21          | 0.623      | 1.049              |
| hsa-miR-26a-5p   | 9.91E-22          | 1.17E-20          | 0.641      | 0.804              |
| hsa-miR-3611     | 6.53E-21          | 7.65E-20          | 0.647      | 1.039              |
| hsa-miR-423-5p   | 6.91E-21          | 7.99E-20          | 0.649      | 1.417              |
| hsa-miR-379-5p   | 6.95E-21          | 7.99E-20          | 0.604      | 0.967              |
| hsa-miR-125a-5p  | 1.15E-20          | 1.31E-19          | 0.629      | 1.397              |
| hsa-miR-1248     | 1.34E-20          | 1.51E-19          | 0.624      | 1.025              |
| hsa-miR-3195     | 2.87E-20          | 3.20E-19          | 0.636      | 4.730              |
| hsa-miR-411-3p   | 4.07E-20          | 4.50E-19          | 0.630      | 0.949              |
| hsa-miR-324-5p   | 7.46E-20          | 8.17E-19          | 0.669      | 1.371              |
| hsa-let-7g-5p    | 8.24E-20          | 8.94E-19          | 0.625      | 0.870              |
| hsa-miR-545-5p   | 1.11E-19          | 1.19E-18          | 0.629      | 1.029              |
| hsa-miR-1284     | 1.47E-19          | 1.57E-18          | 0.628      | 0.963              |
| hsa-miR-222-3p   | 1.60E-19          | 1.69E-18          | 0.615      | 0.809              |
| hsa-miR-4314     | 1.91E-19          | 2.00E-18          | 0.655      | 1.073              |
| hsa-miR-107      | 1.97E-19          | 2.05E-18          | 0.605      | 0.847              |
| hsa-miR-190a-5p  | 7.88E-19          | 8.10E-18          | 0.605      | 0.892              |
| hsa-miR-4298     | 8.80E-19          | 8.97E-18          | 0.646      | 6.586              |
| hsa-miR-1202     | 9.09E-19          | 9.19E-18          | 0.640      | 2.903              |
| hsa-miR-3914     | 1.27E-18          | 1.28E-17          | 0.619      | 1.025              |
| hsa-miR-3152-3p  | 1.32E-18          | 1.31E-17          | 0.661      | 2.060              |
| hsa-miR-4282     | 1.71E-18          | 1.68E-17          | 0.626      | 1.027              |
| hsa-miR-3907     | 2.41E-18          | 2.36E-17          | 0.575      | 0.671              |
| hsa-miR-1973     | 3.38E-18          | 3.28E-17          | 0.616      | 1.653              |
| hsa-miR-144-3p   | 4.83E-18          | 4.64E-17          | 0.612      | 0.797              |
| hsa-miR-628-5p   | 4.97E-18          | 4.74E-17          | 0.594      | 0.884              |
| hsa-miR-7-1-3p   | 5.60E-18          | 5.30E-17          | 0.618      | 0.729              |
| hsa-miR-3667-3p  | 6.61E-18          | 6.21E-17          | 0.612      | 0.974              |
| hsa-miR-410-3p   | 1.05E-17          | 9.74E-17          | 0.595      | 0.925              |
| hsa-miR-454-5p   | 1.13E-17          | 1.04E-16          | 0.619      | 0.847              |
| hsa-miR-1225-5p  | 1.13E-17          | 1.04E-16          | 0.654      | 4.612              |
| hsa-miR-3154     | 1.35E-17          | 1.22E-16          | 0.606      | 1.082              |
| hsa-miR-1263     | 2.06E-17          | 1.86E-16          | 0.615      | 0.981              |
| hsa-miR-93-5p    | 3.18E-17          | 2.85E-16          | 0.590      | 0.840              |
| hsa-miR-574-3p   | 3.61E-17          | 3.21E-16          | 0.629      | 1.342              |
| hsa-miR-3124-5p  | 3.87E-17          | 3.41E-16          | 0.631      | 1.106              |
| hsa-miR-335-5p   | 4.19E-17          | 3.67E-16          | 0.602      | 0.754              |
| hsa-miR-620      | 4.27E-17          | 3.71E-16          | 0.620      | 1.023              |

| <b>miRNA</b>      | <b>ttest_rawp</b> | <b>ttest_adjp</b> | <b>AUC</b> | <b>fold_change</b> |
|-------------------|-------------------|-------------------|------------|--------------------|
| hsa-miR-3916      | 4.50E-17          | 3.88E-16          | 0.601      | 0.971              |
| hsa-miR-296-5p    | 5.60E-17          | 4.80E-16          | 0.617      | 1.411              |
| hsa-miR-1207-5p   | 6.98E-17          | 5.94E-16          | 0.623      | 3.913              |
| hsa-miR-182-5p    | 7.22E-17          | 6.10E-16          | 0.614      | 0.741              |
| hsa-miR-27b-3p    | 8.13E-17          | 6.82E-16          | 0.603      | 0.907              |
| hsa-miR-139-5p    | 1.11E-16          | 9.21E-16          | 0.618      | 1.172              |
| hsa-miR-29b-2-5p  | 1.16E-16          | 9.61E-16          | 0.617      | 0.944              |
| hsa-miR-548p      | 1.23E-16          | 1.01E-15          | 0.620      | 1.028              |
| hsa-miR-550b-3p   | 1.24E-16          | 1.01E-15          | 0.619      | 0.966              |
| hsa-miR-150-3p    | 1.53E-16          | 1.24E-15          | 0.696      | 5.464              |
| hsa-miR-628-3p    | 2.65E-16          | 2.13E-15          | 0.617      | 0.872              |
| hsa-miR-483-5p    | 3.00E-16          | 2.40E-15          | 0.645      | 2.512              |
| hsa-let-7d-3p     | 3.52E-16          | 2.80E-15          | 0.636      | 0.988              |
| hsa-miR-494-3p    | 3.75E-16          | 2.96E-15          | 0.635      | 1.567              |
| hsa-miR-214-3p    | 6.34E-16          | 4.96E-15          | 0.616      | 1.052              |
| hsa-miR-532-5p    | 6.38E-16          | 4.96E-15          | 0.609      | 0.852              |
| hsa-miR-129-2-3p  | 1.13E-15          | 8.71E-15          | 0.623      | 1.089              |
| hsa-miR-3137      | 1.17E-15          | 8.96E-15          | 0.618      | 1.165              |
| hsa-miR-548d-3p   | 1.50E-15          | 1.15E-14          | 0.606      | 0.969              |
| hsa-miR-3115      | 1.51E-15          | 1.15E-14          | 0.625      | 0.967              |
| hsa-miR-766-3p    | 1.53E-15          | 1.15E-14          | 0.612      | 1.258              |
| hsa-miR-3134      | 1.82E-15          | 1.36E-14          | 0.615      | 1.023              |
| hsa-miR-1914-3p   | 2.37E-15          | 1.76E-14          | 0.614      | 1.301              |
| hsa-miR-452-3p    | 2.56E-15          | 1.89E-14          | 0.608      | 1.022              |
| hsa-miR-1273c     | 4.56E-15          | 3.35E-14          | 0.625      | 1.096              |
| hsa-miR-762       | 5.71E-15          | 4.17E-14          | 0.639      | 5.235              |
| hsa-miR-377-3p    | 5.80E-15          | 4.21E-14          | 0.588      | 0.898              |
| hsa-miR-219a-2-3p | 6.46E-15          | 4.66E-14          | 0.598      | 0.983              |
| hsa-miR-20b-3p    | 7.50E-15          | 5.38E-14          | 0.603      | 0.982              |
| hsa-miR-30c-1-3p  | 7.84E-15          | 5.58E-14          | 0.603      | 1.059              |
| hsa-miR-17-3p     | 1.23E-14          | 8.73E-14          | 0.583      | 0.737              |
| hsa-miR-93-3p     | 1.29E-14          | 9.06E-14          | 0.592      | 0.775              |
| hsa-miR-1301-3p   | 1.45E-14          | 1.01E-13          | 0.598      | 1.033              |
| hsa-miR-9-3p      | 1.48E-14          | 1.03E-13          | 0.593      | 0.960              |
| hsa-miR-4284      | 1.76E-14          | 1.22E-13          | 0.611      | 1.195              |
| hsa-miR-3161      | 2.21E-14          | 1.52E-13          | 0.604      | 1.065              |
| hsa-miR-146b-5p   | 2.70E-14          | 1.85E-13          | 0.591      | 0.772              |
| hsa-miR-30a-5p    | 3.45E-14          | 2.35E-13          | 0.594      | 3.182              |
| hsa-miR-643       | 3.86E-14          | 2.61E-13          | 0.565      | 0.975              |
| hsa-miR-151a-3p   | 4.03E-14          | 2.71E-13          | 0.615      | 1.492              |
| hsa-miR-29b-3p    | 4.22E-14          | 2.82E-13          | 0.606      | 0.779              |
| hsa-miR-3121-3p   | 4.55E-14          | 3.02E-13          | 0.593      | 1.175              |
| hsa-let-7e-3p     | 5.33E-14          | 3.52E-13          | 0.608      | 0.952              |
| hsa-miR-373-5p    | 6.50E-14          | 4.27E-13          | 0.622      | 1.053              |
| hsa-miR-3663-3p   | 8.30E-14          | 5.43E-13          | 0.675      | 50.464             |
| hsa-miR-1226-5p   | 9.38E-14          | 6.10E-13          | 0.635      | 1.132              |

| <b>miRNA</b>      | <b>ttest_rawp</b> | <b>ttest_adjp</b> | <b>AUC</b> | <b>fold_change</b> |
|-------------------|-------------------|-------------------|------------|--------------------|
| hsa-miR-487b-3p   | 1.07E-13          | 6.91E-13          | 0.594      | 0.879              |
| hsa-miR-424-3p    | 1.14E-13          | 7.31E-13          | 0.626      | 1.110              |
| hsa-miR-3652      | 1.37E-13          | 8.74E-13          | 0.600      | 1.265              |
| hsa-miR-576-5p    | 1.60E-13          | 1.02E-12          | 0.591      | 0.900              |
| hsa-miR-1295a     | 2.21E-13          | 1.40E-12          | 0.609      | 1.047              |
| hsa-miR-1249-3p   | 2.80E-13          | 1.76E-12          | 0.601      | 2.773              |
| hsa-miR-487a-3p   | 3.02E-13          | 1.89E-12          | 0.573      | 0.957              |
| hsa-miR-664a-5p   | 3.54E-13          | 2.21E-12          | 0.603      | 1.348              |
| hsa-miR-1976      | 3.74E-13          | 2.32E-12          | 0.582      | 1.164              |
| hsa-miR-23b-3p    | 3.82E-13          | 2.35E-12          | 0.622      | 1.244              |
| hsa-let-7g-3p     | 4.64E-13          | 2.84E-12          | 0.598      | 0.971              |
| hsa-miR-135a-3p   | 5.46E-13          | 3.33E-12          | 0.623      | 1.761              |
| hsa-miR-556-5p    | 9.09E-13          | 5.51E-12          | 0.593      | 1.023              |
| hsa-miR-15b-5p    | 1.22E-12          | 7.35E-12          | 0.582      | 0.880              |
| hsa-miR-3926      | 1.35E-12          | 8.08E-12          | 0.598      | 1.326              |
| hsa-miR-513a-5p   | 1.52E-12          | 9.10E-12          | 0.598      | 1.370              |
| hsa-miR-98-5p     | 1.56E-12          | 9.25E-12          | 0.600      | 0.835              |
| hsa-miR-125a-3p   | 1.60E-12          | 9.44E-12          | 0.597      | 1.187              |
| hsa-miR-4328      | 2.49E-12          | 1.47E-11          | 0.588      | 1.023              |
| hsa-miR-501-5p    | 2.84E-12          | 1.66E-11          | 0.598      | 1.271              |
| hsa-let-7f-5p     | 3.01E-12          | 1.75E-11          | 0.601      | 0.912              |
| hsa-miR-1911-3p   | 3.13E-12          | 1.82E-11          | 0.592      | 0.974              |
| hsa-miR-365a-5p   | 3.25E-12          | 1.88E-11          | 0.587      | 1.050              |
| hsa-miR-1307-3p   | 3.55E-12          | 2.04E-11          | 0.621      | 1.087              |
| hsa-miR-1275      | 3.71E-12          | 2.12E-11          | 0.597      | 1.841              |
| hsa-miR-103a-2-5p | 4.10E-12          | 2.33E-11          | 0.599      | 0.883              |
| hsa-miR-3193      | 4.50E-12          | 2.55E-11          | 0.592      | 1.024              |
| hsa-miR-135b-3p   | 5.00E-12          | 2.81E-11          | 0.592      | 1.019              |
| hsa-miR-568       | 5.18E-12          | 2.91E-11          | 0.596      | 1.021              |
| hsa-miR-497-5p    | 5.91E-12          | 3.30E-11          | 0.583      | 0.932              |
| hsa-miR-3934-5p   | 6.03E-12          | 3.35E-11          | 0.592      | 1.176              |
| hsa-miR-33b-3p    | 6.39E-12          | 3.53E-11          | 0.612      | 1.349              |
| hsa-miR-3126-5p   | 8.57E-12          | 4.72E-11          | 0.587      | 1.019              |
| hsa-miR-671-5p    | 9.20E-12          | 5.04E-11          | 0.611      | 1.925              |
| hsa-miR-4271      | 9.70E-12          | 5.29E-11          | 0.625      | 2.093              |
| hsa-miR-758-3p    | 1.01E-11          | 5.44E-11          | 0.596      | 0.929              |
| hsa-miR-423-3p    | 1.01E-11          | 5.44E-11          | 0.597      | 1.153              |
| hsa-miR-3140-3p   | 1.23E-11          | 6.63E-11          | 0.583      | 0.979              |
| hsa-miR-744-5p    | 1.35E-11          | 7.21E-11          | 0.647      | 1.241              |
| hsa-miR-654-5p    | 1.35E-11          | 7.21E-11          | 0.591      | 1.034              |
| hsa-miR-514b-5p   | 1.43E-11          | 7.56E-11          | 0.650      | 1.697              |
| hsa-miR-92b-3p    | 1.43E-11          | 7.56E-11          | 0.600      | 1.128              |
| hsa-miR-765       | 1.51E-11          | 7.96E-11          | 0.632      | 1.326              |
| hsa-miR-551b-5p   | 1.55E-11          | 8.09E-11          | 0.591      | 1.018              |
| hsa-miR-3147      | 1.56E-11          | 8.11E-11          | 0.624      | 1.131              |
| hsa-miR-654-3p    | 1.56E-11          | 8.11E-11          | 0.593      | 0.848              |

| miRNA            | ttest_rawp | ttest_adjp | AUC   | fold_change |
|------------------|------------|------------|-------|-------------|
| hsa-miR-559      | 1.82E-11   | 9.38E-11   | 0.553 | 0.973       |
| hsa-miR-199a-3p  | 2.02E-11   | 1.04E-10   | 0.621 | 0.972       |
| hsa-miR-4270     | 2.64E-11   | 1.35E-10   | 0.632 | 17.914      |
| hsa-miR-132-5p   | 2.67E-11   | 1.36E-10   | 0.616 | 0.959       |
| hsa-miR-3609     | 2.74E-11   | 1.39E-10   | 0.576 | 1.046       |
| hsa-miR-937-3p   | 2.89E-11   | 1.46E-10   | 0.609 | 0.840       |
| hsa-miR-1321     | 3.07E-11   | 1.54E-10   | 0.598 | 1.025       |
| hsa-miR-3605-5p  | 3.21E-11   | 1.61E-10   | 0.595 | 1.049       |
| hsa-miR-30d-3p   | 3.40E-11   | 1.70E-10   | 0.572 | 0.982       |
| hsa-miR-19b-1-5p | 3.70E-11   | 1.83E-10   | 0.619 | 0.966       |
| hsa-miR-376a-3p  | 3.70E-11   | 1.83E-10   | 0.579 | 0.839       |
| hsa-miR-216b-5p  | 3.91E-11   | 1.93E-10   | 0.583 | 1.019       |
| hsa-miR-3179     | 4.31E-11   | 2.11E-10   | 0.576 | 1.052       |
| hsa-miR-1234-3p  | 4.36E-11   | 2.13E-10   | 0.583 | 1.338       |
| hsa-miR-205-5p   | 4.69E-11   | 2.28E-10   | 0.601 | 1.091       |
| hsa-miR-1268a    | 4.82E-11   | 2.34E-10   | 0.598 | 2.267       |
| hsa-miR-3616-5p  | 5.01E-11   | 2.42E-10   | 0.589 | 1.018       |
| hsa-miR-3668     | 6.45E-11   | 3.10E-10   | 0.590 | 1.020       |
| hsa-miR-30b-5p   | 6.93E-11   | 3.32E-10   | 0.597 | 0.889       |
| hsa-miR-502-3p   | 7.64E-11   | 3.64E-10   | 0.613 | 1.233       |
| hsa-miR-3686     | 7.69E-11   | 3.65E-10   | 0.588 | 1.015       |
| hsa-miR-16-2-3p  | 8.45E-11   | 4.00E-10   | 0.515 | 0.404       |
| hsa-miR-129-1-3p | 9.30E-11   | 4.38E-10   | 0.613 | 1.054       |
| hsa-miR-23a-3p   | 9.57E-11   | 4.49E-10   | 0.597 | 1.196       |
| hsa-miR-4323     | 9.62E-11   | 4.49E-10   | 0.591 | 1.180       |
| hsa-miR-106b-3p  | 9.64E-11   | 4.49E-10   | 0.540 | 0.957       |
| hsa-miR-184      | 9.88E-11   | 4.58E-10   | 0.611 | 0.986       |
| hsa-miR-500a-3p  | 1.02E-10   | 4.71E-10   | 0.601 | 1.211       |
| hsa-miR-3660     | 1.35E-10   | 6.21E-10   | 0.592 | 1.017       |
| hsa-miR-3135a    | 1.90E-10   | 8.69E-10   | 0.583 | 1.018       |
| hsa-miR-4313     | 2.97E-10   | 1.36E-09   | 0.600 | 1.100       |
| hsa-miR-24-2-5p  | 3.60E-10   | 1.64E-09   | 0.586 | 1.017       |
| hsa-miR-30e-5p   | 3.96E-10   | 1.79E-09   | 0.599 | 0.877       |
| hsa-miR-572      | 4.30E-10   | 1.94E-09   | 0.564 | 0.877       |
| hsa-miR-1273d    | 5.17E-10   | 2.33E-09   | 0.591 | 1.130       |
| hsa-miR-3943     | 5.44E-10   | 2.44E-09   | 0.576 | 0.979       |
| hsa-miR-3616-3p  | 5.82E-10   | 2.60E-09   | 0.565 | 0.910       |
| hsa-miR-637      | 5.91E-10   | 2.63E-09   | 0.605 | 0.979       |
| hsa-miR-4327     | 7.12E-10   | 3.16E-09   | 0.660 | 5.208       |
| hsa-miR-890      | 7.43E-10   | 3.28E-09   | 0.582 | 1.016       |
| hsa-miR-22-5p    | 8.05E-10   | 3.54E-09   | 0.582 | 0.857       |
| hsa-miR-153-3p   | 8.65E-10   | 3.78E-09   | 0.581 | 1.016       |
| hsa-miR-449b-3p  | 8.69E-10   | 3.78E-09   | 0.599 | 0.757       |
| hsa-miR-892b     | 8.70E-10   | 3.78E-09   | 0.589 | 1.121       |
| hsa-miR-3917     | 1.03E-09   | 4.46E-09   | 0.567 | 1.141       |
| hsa-miR-1537-3p  | 1.03E-09   | 4.46E-09   | 0.577 | 0.984       |

| <b>miRNA</b>     | <b>ttest_rawp</b> | <b>ttest_adjp</b> | <b>AUC</b> | <b>fold_change</b> |
|------------------|-------------------|-------------------|------------|--------------------|
| hsa-miR-4318     | 1.10E-09          | 4.72E-09          | 0.556      | 0.821              |
| hsa-miR-577      | 1.13E-09          | 4.86E-09          | 0.593      | 1.018              |
| hsa-miR-4305     | 1.28E-09          | 5.48E-09          | 0.586      | 0.980              |
| hsa-miR-4257     | 1.35E-09          | 5.74E-09          | 0.591      | 1.203              |
| hsa-miR-518a-5p  | 1.45E-09          | 6.15E-09          | 0.570      | 1.021              |
| hsa-miR-378c     | 1.62E-09          | 6.84E-09          | 0.566      | 1.034              |
| hsa-miR-3940-3p  | 1.63E-09          | 6.85E-09          | 0.595      | 1.105              |
| hsa-miR-143-3p   | 1.69E-09          | 7.07E-09          | 0.602      | 0.966              |
| hsa-miR-1276     | 1.78E-09          | 7.44E-09          | 0.571      | 1.023              |
| hsa-miR-1228-3p  | 1.92E-09          | 7.98E-09          | 0.582      | 1.417              |
| hsa-miR-376a-5p  | 1.94E-09          | 8.03E-09          | 0.572      | 0.930              |
| hsa-miR-142-5p   | 2.17E-09          | 8.98E-09          | 0.608      | 0.814              |
| hsa-miR-2110     | 2.26E-09          | 9.33E-09          | 0.573      | 1.201              |
| hsa-miR-587      | 2.29E-09          | 9.42E-09          | 0.580      | 1.014              |
| hsa-miR-1183     | 2.37E-09          | 9.68E-09          | 0.569      | 1.654              |
| hsa-miR-548s     | 2.54E-09          | 1.04E-08          | 0.578      | 1.018              |
| hsa-miR-655-3p   | 2.74E-09          | 1.11E-08          | 0.578      | 0.977              |
| hsa-miR-138-2-3p | 3.04E-09          | 1.23E-08          | 0.575      | 1.101              |
| hsa-miR-19b-3p   | 3.43E-09          | 1.38E-08          | 0.604      | 0.863              |
| hsa-miR-542-3p   | 3.46E-09          | 1.39E-08          | 0.584      | 0.968              |
| hsa-miR-193a-3p  | 3.61E-09          | 1.45E-08          | 0.613      | 0.941              |
| hsa-miR-342-5p   | 3.87E-09          | 1.54E-08          | 0.602      | 1.308              |
| hsa-miR-2276-3p  | 3.87E-09          | 1.54E-08          | 0.588      | 1.460              |
| hsa-miR-561-3p   | 3.96E-09          | 1.57E-08          | 0.578      | 1.019              |
| hsa-miR-147b     | 4.11E-09          | 1.63E-08          | 0.576      | 0.985              |
| hsa-miR-1471     | 4.37E-09          | 1.72E-08          | 0.577      | 1.747              |
| hsa-miR-1224-5p  | 4.58E-09          | 1.80E-08          | 0.572      | 1.541              |
| hsa-miR-301b-3p  | 4.62E-09          | 1.81E-08          | 0.559      | 0.976              |
| hsa-miR-499a-5p  | 4.69E-09          | 1.83E-08          | 0.572      | 0.982              |
| hsa-miR-3150b-3p | 5.01E-09          | 1.95E-08          | 0.586      | 1.016              |
| hsa-miR-3655     | 5.55E-09          | 2.15E-08          | 0.580      | 0.987              |
| hsa-miR-340-5p   | 5.70E-09          | 2.20E-08          | 0.592      | 0.818              |
| hsa-miR-3155a    | 6.42E-09          | 2.47E-08          | 0.585      | 1.012              |
| hsa-miR-21-3p    | 6.56E-09          | 2.52E-08          | 0.549      | 0.809              |
| hsa-miR-4253     | 7.05E-09          | 2.70E-08          | 0.605      | 1.133              |
| hsa-miR-941      | 7.28E-09          | 2.78E-08          | 0.577      | 1.012              |
| hsa-miR-1204     | 7.31E-09          | 2.78E-08          | 0.575      | 0.972              |
| hsa-miR-7-2-3p   | 8.47E-09          | 3.21E-08          | 0.569      | 0.977              |
| hsa-miR-337-3p   | 9.28E-09          | 3.51E-08          | 0.599      | 0.817              |
| hsa-miR-362-5p   | 9.57E-09          | 3.61E-08          | 0.603      | 1.238              |
| hsa-miR-3945     | 1.11E-08          | 4.15E-08          | 0.643      | 1.993              |
| hsa-miR-299-3p   | 1.11E-08          | 4.15E-08          | 0.575      | 0.986              |
| hsa-miR-148b-3p  | 1.12E-08          | 4.18E-08          | 0.572      | 0.887              |
| hsa-miR-379-3p   | 1.22E-08          | 4.53E-08          | 0.576      | 0.985              |
| hsa-miR-154-5p   | 1.30E-08          | 4.82E-08          | 0.595      | 0.902              |
| hsa-miR-485-5p   | 1.33E-08          | 4.92E-08          | 0.573      | 1.016              |

| miRNA           | ttest_rawp | ttest_adjp | AUC   | fold_change |
|-----------------|------------|------------|-------|-------------|
| hsa-miR-452-5p  | 1.39E-08   | 5.14E-08   | 0.573 | 1.014       |
| hsa-miR-519e-5p | 1.46E-08   | 5.38E-08   | 0.573 | 1.026       |
| hsa-miR-99a-3p  | 1.54E-08   | 5.65E-08   | 0.567 | 0.986       |
| hsa-miR-1237-3p | 1.56E-08   | 5.68E-08   | 0.575 | 1.145       |
| hsa-miR-4256    | 1.74E-08   | 6.32E-08   | 0.575 | 1.012       |
| hsa-miR-591     | 2.12E-08   | 7.70E-08   | 0.568 | 0.983       |
| hsa-miR-326     | 2.16E-08   | 7.83E-08   | 0.580 | 1.312       |
| hsa-miR-192-3p  | 2.25E-08   | 8.11E-08   | 0.568 | 0.912       |
| hsa-miR-3180-3p | 2.34E-08   | 8.41E-08   | 0.582 | 1.296       |
| hsa-miR-524-3p  | 2.60E-08   | 9.31E-08   | 0.593 | 0.982       |
| hsa-miR-1231    | 2.61E-08   | 9.32E-08   | 0.574 | 1.013       |
| hsa-miR-566     | 2.66E-08   | 9.47E-08   | 0.566 | 1.106       |
| hsa-miR-663a    | 2.72E-08   | 9.66E-08   | 0.593 | 2.224       |
| hsa-miR-493-5p  | 3.23E-08   | 1.14E-07   | 0.589 | 0.963       |
| hsa-miR-615-3p  | 3.61E-08   | 1.28E-07   | 0.584 | 0.944       |
| hsa-miR-146b-3p | 3.88E-08   | 1.37E-07   | 0.578 | 0.985       |
| hsa-miR-1914-5p | 3.95E-08   | 1.39E-07   | 0.580 | 0.981       |
| hsa-miR-1270    | 4.32E-08   | 1.51E-07   | 0.569 | 1.100       |
| hsa-miR-374a-3p | 4.45E-08   | 1.55E-07   | 0.586 | 1.029       |
| hsa-miR-221-5p  | 4.46E-08   | 1.55E-07   | 0.593 | 0.941       |
| hsa-miR-3936    | 4.83E-08   | 1.68E-07   | 0.569 | 1.014       |
| hsa-miR-4255    | 5.15E-08   | 1.78E-07   | 0.574 | 1.012       |
| hsa-miR-548w    | 5.53E-08   | 1.91E-07   | 0.597 | 0.974       |
| hsa-miR-589-3p  | 6.33E-08   | 2.18E-07   | 0.556 | 1.085       |
| hsa-miR-3606-5p | 6.35E-08   | 2.18E-07   | 0.587 | 1.026       |
| hsa-miR-3605-3p | 6.43E-08   | 2.19E-07   | 0.578 | 1.046       |
| hsa-miR-10b-3p  | 6.43E-08   | 2.19E-07   | 0.617 | 1.022       |
| hsa-miR-183-5p  | 6.84E-08   | 2.32E-07   | 0.545 | 1.026       |
| hsa-miR-129-5p  | 7.18E-08   | 2.43E-07   | 0.571 | 0.986       |
| hsa-miR-365a-3p | 7.25E-08   | 2.45E-07   | 0.582 | 1.211       |
| hsa-miR-378a-5p | 7.40E-08   | 2.49E-07   | 0.586 | 1.375       |
| hsa-miR-875-3p  | 7.61E-08   | 2.56E-07   | 0.575 | 1.014       |
| hsa-miR-1182    | 8.95E-08   | 3.00E-07   | 0.623 | 1.159       |
| hsa-miR-3684    | 9.29E-08   | 3.11E-07   | 0.564 | 0.976       |
| hsa-miR-583     | 9.90E-08   | 3.30E-07   | 0.600 | 1.024       |
| hsa-miR-3918    | 1.01E-07   | 3.36E-07   | 0.554 | 1.018       |
| hsa-miR-1908-5p | 1.03E-07   | 3.42E-07   | 0.559 | 1.029       |
| hsa-let-7a-5p   | 1.08E-07   | 3.58E-07   | 0.573 | 0.958       |
| hsa-miR-744-3p  | 1.21E-07   | 3.98E-07   | 0.572 | 0.948       |
| hsa-miR-512-3p  | 1.27E-07   | 4.19E-07   | 0.578 | 1.017       |
| hsa-miR-4290    | 1.52E-07   | 4.97E-07   | 0.561 | 0.887       |
| hsa-miR-2052    | 1.58E-07   | 5.16E-07   | 0.575 | 1.014       |
| hsa-miR-564     | 1.63E-07   | 5.30E-07   | 0.557 | 0.849       |
| hsa-miR-601     | 1.73E-07   | 5.62E-07   | 0.613 | 1.138       |
| hsa-miR-186-5p  | 1.77E-07   | 5.72E-07   | 0.560 | 1.484       |
| hsa-miR-498     | 1.86E-07   | 6.00E-07   | 0.548 | 1.135       |



| miRNA           | ttest_rawp | ttest_adjp | AUC   | fold_change |
|-----------------|------------|------------|-------|-------------|
| hsa-miR-1207-3p | 1.93E-07   | 6.21E-07   | 0.556 | 0.983       |
| hsa-miR-548k    | 1.93E-07   | 6.21E-07   | 0.578 | 0.986       |
| hsa-miR-3925-5p | 1.94E-07   | 6.21E-07   | 0.585 | 1.022       |
| hsa-miR-491-3p  | 1.95E-07   | 6.23E-07   | 0.561 | 0.950       |
| hsa-miR-455-5p  | 1.96E-07   | 6.25E-07   | 0.576 | 0.986       |
| hsa-miR-3200-3p | 2.12E-07   | 6.74E-07   | 0.581 | 0.905       |
| hsa-miR-1181    | 2.19E-07   | 6.95E-07   | 0.579 | 2.610       |
| hsa-miR-105-5p  | 2.27E-07   | 7.19E-07   | 0.559 | 0.988       |
| hsa-miR-29c-5p  | 2.68E-07   | 8.45E-07   | 0.583 | 1.489       |
| hsa-miR-630     | 2.93E-07   | 9.20E-07   | 0.627 | 2.881       |
| hsa-miR-3929    | 2.95E-07   | 9.26E-07   | 0.572 | 1.012       |
| hsa-miR-3201    | 2.97E-07   | 9.29E-07   | 0.575 | 1.014       |
| hsa-miR-361-3p  | 3.31E-07   | 1.03E-06   | 0.592 | 1.282       |
| hsa-miR-1297    | 3.51E-07   | 1.09E-06   | 0.572 | 1.014       |
| hsa-miR-4254    | 3.53E-07   | 1.09E-06   | 0.556 | 0.872       |
| hsa-miR-505-5p  | 3.61E-07   | 1.12E-06   | 0.587 | 1.255       |
| hsa-miR-1184    | 3.63E-07   | 1.12E-06   | 0.566 | 0.986       |
| hsa-miR-3911    | 3.63E-07   | 1.12E-06   | 0.611 | 4.141       |
| hsa-miR-4308    | 3.70E-07   | 1.14E-06   | 0.563 | 0.985       |
| hsa-miR-622     | 4.38E-07   | 1.34E-06   | 0.526 | 1.366       |
| hsa-miR-26b-3p  | 4.87E-07   | 1.49E-06   | 0.559 | 0.948       |
| hsa-miR-520h    | 4.93E-07   | 1.50E-06   | 0.560 | 0.974       |
| hsa-miR-764     | 5.37E-07   | 1.63E-06   | 0.564 | 0.925       |
| hsa-miR-1208    | 5.41E-07   | 1.64E-06   | 0.565 | 1.016       |
| hsa-miR-188-3p  | 5.71E-07   | 1.73E-06   | 0.571 | 0.974       |
| hsa-miR-105-3p  | 5.96E-07   | 1.80E-06   | 0.569 | 1.017       |
| hsa-miR-4303    | 6.07E-07   | 1.83E-06   | 0.567 | 1.011       |
| hsa-miR-1911-5p | 6.12E-07   | 1.84E-06   | 0.567 | 0.989       |
| hsa-miR-3654    | 6.23E-07   | 1.87E-06   | 0.593 | 1.028       |
| hsa-miR-516b-5p | 6.59E-07   | 1.97E-06   | 0.573 | 1.015       |
| hsa-miR-1265    | 6.65E-07   | 1.98E-06   | 0.571 | 0.983       |
| hsa-miR-3910    | 6.91E-07   | 2.05E-06   | 0.558 | 1.014       |
| hsa-miR-548t-5p | 6.93E-07   | 2.06E-06   | 0.603 | 0.979       |
| hsa-miR-448     | 7.42E-07   | 2.20E-06   | 0.574 | 1.017       |
| hsa-miR-1246    | 7.70E-07   | 2.27E-06   | 0.566 | 1.281       |
| hsa-miR-1304-5p | 7.93E-07   | 2.33E-06   | 0.570 | 0.966       |
| hsa-miR-223-3p  | 8.01E-07   | 2.35E-06   | 0.581 | 0.916       |
| hsa-miR-384     | 8.14E-07   | 2.38E-06   | 0.579 | 1.016       |
| hsa-miR-3937    | 8.33E-07   | 2.43E-06   | 0.602 | 2.633       |
| hsa-miR-668-3p  | 8.37E-07   | 2.44E-06   | 0.574 | 0.976       |
| hsa-miR-532-3p  | 8.58E-07   | 2.49E-06   | 0.600 | 1.202       |
| hsa-miR-4251    | 8.74E-07   | 2.53E-06   | 0.581 | 1.023       |
| hsa-miR-3202    | 8.76E-07   | 2.53E-06   | 0.613 | 1.567       |
| hsa-miR-636     | 8.77E-07   | 2.53E-06   | 0.573 | 1.047       |
| hsa-miR-548j-5p | 8.88E-07   | 2.56E-06   | 0.562 | 0.969       |
| hsa-miR-193b-5p | 8.95E-07   | 2.57E-06   | 0.574 | 1.047       |

| <b>miRNA</b>    | <b>ttest_rawp</b> | <b>ttest_adjp</b> | <b>AUC</b> | <b>fold_change</b> |
|-----------------|-------------------|-------------------|------------|--------------------|
| hsa-miR-3610    | 9.77E-07          | 2.80E-06          | 0.616      | 1.595              |
| hsa-miR-484     | 1.05E-06          | 3.00E-06          | 0.585      | 1.384              |
| hsa-miR-425-3p  | 1.06E-06          | 3.04E-06          | 0.574      | 1.081              |
| hsa-miR-342-3p  | 1.07E-06          | 3.05E-06          | 0.590      | 1.204              |
| hsa-miR-4274    | 1.09E-06          | 3.10E-06          | 0.535      | 1.429              |
| hsa-miR-1299    | 1.10E-06          | 3.10E-06          | 0.599      | 1.209              |
| hsa-miR-548b-3p | 1.20E-06          | 3.38E-06          | 0.583      | 0.971              |
| hsa-miR-613     | 1.25E-06          | 3.51E-06          | 0.572      | 0.818              |
| hsa-miR-574-5p  | 1.29E-06          | 3.62E-06          | 0.570      | 1.856              |
| hsa-miR-1229-3p | 1.58E-06          | 4.44E-06          | 0.573      | 1.061              |
| hsa-miR-514a-3p | 1.68E-06          | 4.70E-06          | 0.562      | 1.012              |
| hsa-miR-4259    | 2.02E-06          | 5.65E-06          | 0.614      | 1.111              |
| hsa-miR-520a-5p | 2.06E-06          | 5.73E-06          | 0.566      | 1.014              |
| hsa-miR-496     | 2.07E-06          | 5.74E-06          | 0.564      | 0.987              |
| hsa-miR-525-5p  | 2.12E-06          | 5.85E-06          | 0.574      | 1.019              |
| hsa-let-7d-5p   | 2.12E-06          | 5.85E-06          | 0.562      | 0.979              |
| hsa-miR-585-3p  | 2.31E-06          | 6.37E-06          | 0.568      | 0.987              |
| hsa-miR-627-5p  | 2.34E-06          | 6.45E-06          | 0.581      | 0.844              |
| hsa-miR-4297    | 2.41E-06          | 6.60E-06          | 0.564      | 0.903              |
| hsa-miR-501-3p  | 2.41E-06          | 6.61E-06          | 0.582      | 1.157              |
| hsa-miR-361-5p  | 2.57E-06          | 7.01E-06          | 0.577      | 1.177              |
| hsa-miR-518a-3p | 2.71E-06          | 7.38E-06          | 0.588      | 0.973              |
| hsa-miR-606     | 2.76E-06          | 7.49E-06          | 0.563      | 1.013              |
| hsa-miR-375     | 2.86E-06          | 7.75E-06          | 0.580      | 1.143              |
| hsa-miR-517a-3p | 2.98E-06          | 8.06E-06          | 0.560      | 0.974              |
| hsa-miR-711     | 3.17E-06          | 8.57E-06          | 0.618      | 1.373              |
| hsa-miR-888-5p  | 3.23E-06          | 8.70E-06          | 0.567      | 1.011              |
| hsa-miR-337-5p  | 3.37E-06          | 9.06E-06          | 0.552      | 0.985              |
| hsa-miR-516a-5p | 3.45E-06          | 9.26E-06          | 0.555      | 1.024              |
| hsa-miR-196b-3p | 3.84E-06          | 1.03E-05          | 0.568      | 0.960              |
| hsa-miR-185-3p  | 3.84E-06          | 1.03E-05          | 0.557      | 0.984              |
| hsa-miR-133a-3p | 3.92E-06          | 1.04E-05          | 0.559      | 1.075              |
| hsa-miR-3679-3p | 4.27E-06          | 1.13E-05          | 0.581      | 1.126              |
| hsa-miR-515-3p  | 4.35E-06          | 1.15E-05          | 0.587      | 0.962              |
| hsa-miR-1468-5p | 4.65E-06          | 1.23E-05          | 0.563      | 0.989              |
| hsa-miR-328-3p  | 4.79E-06          | 1.26E-05          | 0.575      | 1.020              |
| hsa-miR-208a-3p | 5.34E-06          | 1.41E-05          | 0.564      | 1.011              |
| hsa-miR-188-5p  | 5.41E-06          | 1.42E-05          | 0.550      | 2.823              |
| hsa-miR-936     | 5.53E-06          | 1.45E-05          | 0.568      | 1.042              |
| hsa-miR-593-3p  | 5.63E-06          | 1.47E-05          | 0.572      | 0.986              |
| hsa-miR-431-3p  | 5.99E-06          | 1.56E-05          | 0.561      | 0.987              |
| hsa-miR-1262    | 5.99E-06          | 1.56E-05          | 0.566      | 1.014              |
| hsa-miR-3180-5p | 6.17E-06          | 1.60E-05          | 0.560      | 1.099              |
| hsa-miR-450b-5p | 6.63E-06          | 1.72E-05          | 0.563      | 1.018              |
| hsa-miR-602     | 6.75E-06          | 1.75E-05          | 0.555      | 1.080              |
| hsa-miR-3175    | 6.81E-06          | 1.76E-05          | 0.560      | 1.009              |

| miRNA           | ttest_rawp | ttest_adjp | AUC   | fold_change |
|-----------------|------------|------------|-------|-------------|
| hsa-miR-3186-5p | 6.96E-06   | 1.79E-05   | 0.562 | 0.988       |
| hsa-miR-4315    | 7.15E-06   | 1.84E-05   | 0.561 | 1.012       |
| hsa-miR-933     | 7.35E-06   | 1.89E-05   | 0.555 | 1.105       |
| hsa-miR-582-5p  | 7.43E-06   | 1.90E-05   | 0.600 | 0.958       |
| hsa-miR-4287    | 7.64E-06   | 1.95E-05   | 0.552 | 0.991       |
| hsa-miR-3614-5p | 7.98E-06   | 2.03E-05   | 0.571 | 1.070       |
| hsa-miR-3117-3p | 8.22E-06   | 2.09E-05   | 0.563 | 0.975       |
| hsa-miR-382-5p  | 8.39E-06   | 2.13E-05   | 0.562 | 0.957       |
| hsa-miR-550a-5p | 8.71E-06   | 2.21E-05   | 0.574 | 1.073       |
| hsa-miR-570-3p  | 9.09E-06   | 2.30E-05   | 0.554 | 0.982       |
| hsa-miR-1-3p    | 9.87E-06   | 2.49E-05   | 0.570 | 1.017       |
| hsa-miR-421     | 1.02E-05   | 2.56E-05   | 0.561 | 0.960       |
| hsa-miR-202-3p  | 1.02E-05   | 2.56E-05   | 0.559 | 1.011       |
| hsa-miR-3144-3p | 1.16E-05   | 2.91E-05   | 0.572 | 0.981       |
| hsa-miR-518b    | 1.19E-05   | 2.97E-05   | 0.556 | 1.025       |
| hsa-miR-1277-3p | 1.20E-05   | 2.99E-05   | 0.578 | 1.019       |
| hsa-miR-548m    | 1.20E-05   | 3.00E-05   | 0.572 | 0.968       |
| hsa-miR-3614-3p | 1.21E-05   | 3.00E-05   | 0.548 | 0.985       |
| hsa-miR-1972    | 1.21E-05   | 3.01E-05   | 0.569 | 2.505       |
| hsa-miR-3185    | 1.22E-05   | 3.02E-05   | 0.574 | 0.989       |
| hsa-miR-629-5p  | 1.25E-05   | 3.08E-05   | 0.588 | 1.146       |
| hsa-miR-3682-3p | 1.25E-05   | 3.08E-05   | 0.565 | 1.093       |
| hsa-miR-3672    | 1.32E-05   | 3.25E-05   | 0.564 | 1.015       |
| hsa-miR-431-5p  | 1.34E-05   | 3.29E-05   | 0.559 | 0.961       |
| hsa-miR-760     | 1.53E-05   | 3.75E-05   | 0.554 | 1.040       |
| hsa-miR-590-3p  | 1.54E-05   | 3.77E-05   | 0.573 | 1.020       |
| hsa-miR-298     | 1.60E-05   | 3.89E-05   | 0.572 | 0.988       |
| hsa-miR-662     | 1.62E-05   | 3.94E-05   | 0.558 | 1.028       |
| hsa-miR-4286    | 1.64E-05   | 3.99E-05   | 0.559 | 2.140       |
| hsa-miR-140-3p  | 1.65E-05   | 3.99E-05   | 0.641 | 1.212       |
| hsa-miR-3182    | 1.74E-05   | 4.20E-05   | 0.564 | 1.009       |
| hsa-miR-299-5p  | 1.76E-05   | 4.25E-05   | 0.550 | 0.889       |
| hsa-miR-3194-5p | 1.79E-05   | 4.32E-05   | 0.582 | 3.111       |
| hsa-miR-210-3p  | 1.91E-05   | 4.59E-05   | 0.558 | 1.117       |
| hsa-miR-215-5p  | 1.97E-05   | 4.72E-05   | 0.578 | 0.889       |
| hsa-miR-432-3p  | 2.01E-05   | 4.81E-05   | 0.537 | 0.978       |
| hsa-miR-132-3p  | 2.09E-05   | 5.00E-05   | 0.559 | 0.923       |
| hsa-miR-34b-3p  | 2.44E-05   | 5.82E-05   | 0.550 | 0.951       |
| hsa-miR-18a-3p  | 2.74E-05   | 6.51E-05   | 0.576 | 0.953       |
| hsa-miR-28-5p   | 2.78E-05   | 6.61E-05   | 0.558 | 0.914       |
| hsa-miR-548a-3p | 2.90E-05   | 6.86E-05   | 0.552 | 0.987       |
| hsa-miR-371a-5p | 2.91E-05   | 6.88E-05   | 0.563 | 1.172       |
| hsa-miR-642b-3p | 2.96E-05   | 7.00E-05   | 0.560 | 2.657       |
| hsa-miR-1302    | 3.09E-05   | 7.28E-05   | 0.562 | 1.013       |
| hsa-miR-3928-3p | 3.17E-05   | 7.45E-05   | 0.552 | 0.992       |
| hsa-miR-130a-5p | 3.33E-05   | 7.82E-05   | 0.550 | 0.931       |

| <b>miRNA</b>     | <b>ttest_rawp</b> | <b>ttest_adjp</b> | <b>AUC</b> | <b>fold_change</b> |
|------------------|-------------------|-------------------|------------|--------------------|
| hsa-miR-615-5p   | 3.34E-05          | 7.83E-05          | 0.511      | 1.032              |
| hsa-miR-3667-5p  | 3.46E-05          | 8.09E-05          | 0.548      | 1.518              |
| hsa-miR-192-5p   | 3.50E-05          | 8.18E-05          | 0.574      | 0.906              |
| hsa-miR-490-3p   | 3.66E-05          | 8.53E-05          | 0.547      | 1.014              |
| hsa-miR-1224-3p  | 3.91E-05          | 9.08E-05          | 0.554      | 0.979              |
| hsa-miR-4299     | 3.94E-05          | 9.14E-05          | 0.576      | 1.236              |
| hsa-miR-3142     | 4.05E-05          | 9.38E-05          | 0.547      | 1.011              |
| hsa-miR-9-5p     | 4.09E-05          | 9.45E-05          | 0.529      | 0.988              |
| hsa-miR-4311     | 4.14E-05          | 9.54E-05          | 0.544      | 1.020              |
| hsa-miR-3689a-3p | 4.20E-05          | 9.66E-05          | 0.553      | 0.988              |
| hsa-miR-579-3p   | 4.20E-05          | 9.66E-05          | 0.547      | 0.989              |
| hsa-miR-3648     | 4.42E-05          | 0.000101          | 0.576      | 6.713              |
| hsa-miR-1469     | 4.56E-05          | 0.000104          | 0.538      | 1.056              |
| hsa-miR-3622a-5p | 4.66E-05          | 0.000106          | 0.564      | 1.014              |
| hsa-miR-125b-5p  | 4.89E-05          | 0.000112          | 0.549      | 1.315              |
| hsa-miR-3162-5p  | 5.11E-05          | 0.000116          | 0.555      | 1.445              |
| hsa-miR-3166     | 5.14E-05          | 0.000117          | 0.551      | 0.990              |
| hsa-miR-3944-3p  | 5.27E-05          | 0.000119          | 0.557      | 0.991              |
| hsa-miR-3196     | 5.31E-05          | 0.000120          | 0.571      | 2.118              |
| hsa-miR-1197     | 5.61E-05          | 0.000127          | 0.582      | 0.988              |
| hsa-miR-1255b-5p | 5.64E-05          | 0.000127          | 0.547      | 1.121              |
| hsa-miR-521      | 5.75E-05          | 0.000129          | 0.572      | 0.930              |
| hsa-miR-548c-3p  | 5.82E-05          | 0.000131          | 0.508      | 0.963              |
| hsa-miR-3174     | 5.93E-05          | 0.000133          | 0.549      | 1.015              |
| hsa-miR-3689a-5p | 6.02E-05          | 0.000135          | 0.552      | 0.991              |
| hsa-miR-1238-3p  | 6.46E-05          | 0.000144          | 0.549      | 1.122              |
| hsa-miR-3915     | 6.58E-05          | 0.000147          | 0.563      | 1.012              |
| hsa-miR-4272     | 6.84E-05          | 0.000152          | 0.555      | 1.011              |
| hsa-miR-548b-5p  | 7.53E-05          | 0.000167          | 0.551      | 0.974              |
| hsa-miR-3116     | 8.16E-05          | 0.000181          | 0.553      | 1.008              |
| hsa-miR-3923     | 8.49E-05          | 0.000188          | 0.562      | 1.018              |
| hsa-miR-548q     | 8.73E-05          | 0.000193          | 0.571      | 0.972              |
| hsa-miR-4275     | 8.77E-05          | 0.000193          | 0.556      | 0.984              |
| hsa-miR-646      | 8.78E-05          | 0.000193          | 0.550      | 0.990              |
| hsa-miR-19a-5p   | 8.81E-05          | 0.000193          | 0.547      | 1.011              |
| hsa-miR-1294     | 9.22E-05          | 0.000202          | 0.553      | 0.972              |
| hsa-miR-511-5p   | 9.44E-05          | 0.000206          | 0.548      | 1.010              |
| hsa-miR-3678-3p  | 9.51E-05          | 0.000207          | 0.561      | 0.992              |
| hsa-miR-106a-3p  | 9.60E-05          | 0.000209          | 0.553      | 0.985              |
| hsa-miR-29c-3p   | 9.60E-05          | 0.000209          | 0.572      | 0.855              |
| hsa-miR-605-5p   | 9.91E-05          | 0.000215          | 0.558      | 0.899              |
| hsa-miR-548g-3p  | 0.000105          | 0.000227          | 0.571      | 1.026              |
| hsa-miR-3132     | 0.000105          | 0.000227          | 0.575      | 1.023              |
| hsa-miR-4285     | 0.000106          | 0.000228          | 0.554      | 1.010              |
| hsa-miR-541-5p   | 0.000123          | 0.000265          | 0.561      | 0.989              |
| hsa-miR-1273e    | 0.000127          | 0.000272          | 0.548      | 1.072              |

| miRNA            | ttest_rawp | ttest_adjp | AUC   | fold_change |
|------------------|------------|------------|-------|-------------|
| hsa-miR-28-3p    | 0.000128   | 0.000275   | 0.518 | 1.040       |
| hsa-miR-29a-5p   | 0.000132   | 0.000284   | 0.553 | 0.961       |
| hsa-miR-449c-3p  | 0.000137   | 0.000292   | 0.573 | 0.978       |
| hsa-miR-449c-5p  | 0.000137   | 0.000293   | 0.557 | 0.989       |
| hsa-miR-3908     | 0.000142   | 0.000303   | 0.556 | 1.010       |
| hsa-miR-3692-3p  | 0.000145   | 0.000309   | 0.547 | 1.008       |
| hsa-miR-3658     | 0.000149   | 0.000316   | 0.551 | 1.010       |
| hsa-miR-1254     | 0.000151   | 0.000321   | 0.585 | 1.017       |
| hsa-miR-345-5p   | 0.000152   | 0.000322   | 0.570 | 0.968       |
| hsa-miR-548y     | 0.000154   | 0.000324   | 0.528 | 0.956       |
| hsa-miR-381-3p   | 0.000157   | 0.000331   | 0.596 | 0.974       |
| hsa-miR-938      | 0.000173   | 0.000363   | 0.558 | 1.011       |
| hsa-miR-610      | 0.000186   | 0.000391   | 0.551 | 0.962       |
| hsa-miR-658      | 0.000190   | 0.000399   | 0.550 | 0.989       |
| hsa-miR-4324     | 0.000198   | 0.000414   | 0.527 | 0.924       |
| hsa-miR-4277     | 0.000203   | 0.000425   | 0.546 | 0.991       |
| hsa-miR-372-3p   | 0.000206   | 0.000431   | 0.549 | 0.992       |
| hsa-miR-504-5p   | 0.000218   | 0.000455   | 0.560 | 0.989       |
| hsa-miR-485-3p   | 0.000239   | 0.000497   | 0.536 | 1.180       |
| hsa-miR-32-5p    | 0.000255   | 0.000530   | 0.560 | 0.974       |
| hsa-miR-331-5p   | 0.000259   | 0.000537   | 0.557 | 1.010       |
| hsa-miR-3123     | 0.000268   | 0.000554   | 0.545 | 1.009       |
| hsa-miR-508-5p   | 0.000273   | 0.000563   | 0.549 | 0.992       |
| hsa-miR-339-5p   | 0.000276   | 0.000569   | 0.546 | 0.926       |
| hsa-miR-4326     | 0.000281   | 0.000578   | 0.540 | 1.061       |
| hsa-miR-138-1-3p | 0.000284   | 0.000583   | 0.550 | 1.014       |
| hsa-miR-3681-3p  | 0.000285   | 0.000585   | 0.558 | 0.986       |
| hsa-miR-509-3-5p | 0.000308   | 0.000630   | 0.544 | 1.010       |
| hsa-miR-625-3p   | 0.000324   | 0.000661   | 0.553 | 1.044       |
| hsa-miR-520d-3p  | 0.000330   | 0.000672   | 0.574 | 0.892       |
| hsa-miR-323b-5p  | 0.000333   | 0.000678   | 0.546 | 0.991       |
| hsa-miR-3173-3p  | 0.000340   | 0.000691   | 0.554 | 1.011       |
| hsa-miR-335-3p   | 0.000347   | 0.000704   | 0.551 | 0.723       |
| hsa-miR-3692-5p  | 0.000347   | 0.000704   | 0.561 | 1.016       |
| hsa-miR-4307     | 0.000348   | 0.000704   | 0.551 | 0.953       |
| hsa-miR-142-3p   | 0.000349   | 0.000704   | 0.549 | 0.915       |
| hsa-miR-3617-5p  | 0.000361   | 0.000728   | 0.505 | 1.023       |
| hsa-miR-138-5p   | 0.000391   | 0.000786   | 0.525 | 0.991       |
| hsa-miR-4310     | 0.000394   | 0.000790   | 0.544 | 1.057       |
| hsa-miR-145-3p   | 0.000396   | 0.000793   | 0.538 | 0.980       |
| hsa-miR-609      | 0.000413   | 0.000827   | 0.538 | 0.978       |
| hsa-miR-3691-5p  | 0.000427   | 0.000853   | 0.548 | 0.992       |
| hsa-miR-647      | 0.000443   | 0.000883   | 0.554 | 0.987       |
| hsa-miR-3197     | 0.000452   | 0.000900   | 0.545 | 0.987       |
| hsa-miR-653-5p   | 0.000456   | 0.000906   | 0.545 | 1.011       |
| hsa-miR-545-3p   | 0.000457   | 0.000906   | 0.546 | 0.985       |

| <b>miRNA</b>    | <b>ttest_rawp</b> | <b>ttest_adjp</b> | <b>AUC</b> | <b>fold_change</b> |
|-----------------|-------------------|-------------------|------------|--------------------|
| hsa-miR-3183    | 0.000492          | 0.000975          | 0.501      | 1.040              |
| hsa-miR-2116-3p | 0.000501          | 0.000990          | 0.545      | 1.068              |
| hsa-miR-331-3p  | 0.000510          | 0.001007          | 0.581      | 1.169              |
| hsa-miR-922     | 0.000513          | 0.001012          | 0.544      | 1.009              |
| hsa-let-7a-3p   | 0.000524          | 0.001031          | 0.519      | 0.980              |
| hsa-miR-616-3p  | 0.000540          | 0.001062          | 0.546      | 1.010              |
| hsa-miR-196a-5p | 0.000542          | 0.001062          | 0.572      | 0.967              |
| hsa-miR-10a-5p  | 0.000555          | 0.001087          | 0.558      | 1.289              |
| hsa-miR-146a-3p | 0.000557          | 0.001089          | 0.561      | 1.010              |
| hsa-miR-493-3p  | 0.000558          | 0.001089          | 0.541      | 1.013              |
| hsa-miR-127-3p  | 0.000564          | 0.001100          | 0.542      | 1.072              |
| hsa-miR-3065-5p | 0.000602          | 0.001171          | 0.547      | 1.008              |
| hsa-miR-3118    | 0.000629          | 0.001221          | 0.555      | 1.009              |
| hsa-miR-608     | 0.000631          | 0.001225          | 0.548      | 0.993              |
| hsa-miR-518f-5p | 0.000672          | 0.001302          | 0.562      | 0.992              |
| hsa-miR-1910-5p | 0.000674          | 0.001303          | 0.563      | 0.874              |
| hsa-miR-548h-5p | 0.000680          | 0.001313          | 0.537      | 0.991              |
| hsa-miR-2114-3p | 0.000697          | 0.001343          | 0.543      | 1.008              |
| hsa-miR-198     | 0.000706          | 0.001357          | 0.587      | 1.424              |
| hsa-miR-3615    | 0.000715          | 0.001373          | 0.530      | 1.042              |
| hsa-miR-3177-3p | 0.000738          | 0.001415          | 0.530      | 1.013              |
| hsa-miR-3665    | 0.000749          | 0.001433          | 0.556      | 1.459              |
| hsa-miR-1539    | 0.000762          | 0.001457          | 0.543      | 1.041              |
| hsa-miR-509-5p  | 0.000809          | 0.001543          | 0.538      | 1.020              |
| hsa-miR-520a-3p | 0.000835          | 0.001591          | 0.561      | 0.961              |
| hsa-miR-508-3p  | 0.000840          | 0.001598          | 0.546      | 1.008              |
| hsa-miR-597-5p  | 0.000845          | 0.001604          | 0.541      | 0.991              |
| hsa-miR-4329    | 0.000875          | 0.001658          | 0.541      | 0.985              |
| hsa-miR-3620-3p | 0.000898          | 0.001699          | 0.533      | 1.082              |
| hsa-miR-409-5p  | 0.000920          | 0.001739          | 0.547      | 0.970              |
| hsa-miR-214-5p  | 0.000930          | 0.001754          | 0.544      | 0.992              |
| hsa-miR-1185-5p | 0.000937          | 0.001765          | 0.543      | 0.989              |
| hsa-miR-2115-5p | 0.000977          | 0.001837          | 0.529      | 1.051              |
| hsa-miR-1273a   | 0.000989          | 0.001857          | 0.548      | 1.011              |
| hsa-miR-514b-3p | 0.000994          | 0.001863          | 0.542      | 0.993              |
| hsa-miR-191-3p  | 0.001029          | 0.001926          | 0.534      | 1.080              |
| hsa-miR-367-5p  | 0.001048          | 0.001958          | 0.546      | 1.015              |
| hsa-miR-659-3p  | 0.001057          | 0.001970          | 0.552      | 1.317              |
| hsa-miR-33a-5p  | 0.001057          | 0.001970          | 0.554      | 1.009              |
| hsa-miR-3650    | 0.001090          | 0.002027          | 0.558      | 1.004              |
| hsa-miR-542-5p  | 0.001101          | 0.002044          | 0.543      | 1.067              |
| hsa-miR-3657    | 0.001133          | 0.002101          | 0.541      | 0.988              |
| hsa-miR-380-3p  | 0.001144          | 0.002119          | 0.532      | 0.981              |
| hsa-miR-378a-3p | 0.001174          | 0.002170          | 0.588      | 1.224              |
| hsa-miR-1228-5p | 0.001185          | 0.002187          | 0.531      | 1.037              |
| hsa-miR-1915-3p | 0.001187          | 0.002188          | 0.552      | 3.006              |

| <b>miRNA</b>     | <b>ttest_rawp</b> | <b>ttest_adjp</b> | <b>AUC</b> | <b>fold_change</b> |
|------------------|-------------------|-------------------|------------|--------------------|
| hsa-miR-624-3p   | 0.001204          | 0.002215          | 0.535      | 0.988              |
| hsa-miR-1244     | 0.001265          | 0.002323          | 0.521      | 0.986              |
| hsa-miR-451a     | 0.001324          | 0.002429          | 0.536      | 0.966              |
| hsa-miR-466      | 0.001432          | 0.002622          | 0.540      | 0.916              |
| hsa-miR-1269a    | 0.001447          | 0.002645          | 0.541      | 0.993              |
| hsa-miR-128-3p   | 0.001539          | 0.002809          | 0.564      | 1.108              |
| hsa-miR-661      | 0.001598          | 0.002912          | 0.549      | 0.993              |
| hsa-miR-920      | 0.001661          | 0.003020          | 0.545      | 1.007              |
| hsa-miR-218-2-3p | 0.001662          | 0.003020          | 0.549      | 0.990              |
| hsa-miR-2861     | 0.001680          | 0.003049          | 0.548      | 1.143              |
| hsa-miR-3927-3p  | 0.001742          | 0.003156          | 0.550      | 1.009              |
| hsa-miR-548l     | 0.001749          | 0.003164          | 0.542      | 0.992              |
| hsa-miR-2277-5p  | 0.001757          | 0.003173          | 0.541      | 1.008              |
| hsa-miR-4264     | 0.001774          | 0.003199          | 0.527      | 0.991              |
| hsa-miR-141-5p   | 0.001781          | 0.003207          | 0.541      | 0.993              |
| hsa-miR-611      | 0.001792          | 0.003222          | 0.543      | 0.992              |
| hsa-miR-4322     | 0.001797          | 0.003226          | 0.501      | 2.061              |
| hsa-miR-300      | 0.001850          | 0.003316          | 0.552      | 0.992              |
| hsa-miR-199b-5p  | 0.001855          | 0.003319          | 0.551      | 1.021              |
| hsa-miR-588      | 0.001861          | 0.003325          | 0.548      | 0.991              |
| hsa-miR-889-3p   | 0.001865          | 0.003328          | 0.540      | 0.991              |
| hsa-miR-3619-5p  | 0.001894          | 0.003374          | 0.547      | 1.006              |
| hsa-miR-135a-5p  | 0.001941          | 0.003452          | 0.544      | 0.967              |
| hsa-miR-1909-3p  | 0.002002          | 0.003556          | 0.537      | 0.993              |
| hsa-miR-3662     | 0.002056          | 0.003647          | 0.537      | 1.009              |
| hsa-miR-935      | 0.002060          | 0.003647          | 0.548      | 0.991              |
| hsa-miR-186-3p   | 0.002100          | 0.003714          | 0.538      | 0.985              |
| hsa-miR-4258     | 0.002105          | 0.003716          | 0.560      | 0.987              |
| hsa-miR-769-5p   | 0.002144          | 0.003779          | 0.524      | 1.115              |
| hsa-miR-329-3p   | 0.002213          | 0.003897          | 0.553      | 0.964              |
| hsa-miR-873-5p   | 0.002245          | 0.003946          | 0.543      | 0.991              |
| hsa-miR-663b     | 0.002295          | 0.004028          | 0.553      | 0.993              |
| hsa-miR-194-5p   | 0.002463          | 0.004317          | 0.553      | 0.993              |
| hsa-miR-92a-3p   | 0.002507          | 0.004382          | 0.627      | 1.130              |
| hsa-miR-526b-5p  | 0.002508          | 0.004382          | 0.556      | 1.089              |
| hsa-miR-488-3p   | 0.002530          | 0.004415          | 0.549      | 0.991              |
| hsa-miR-525-3p   | 0.002610          | 0.004547          | 0.551      | 0.990              |
| hsa-miR-3199     | 0.002635          | 0.004579          | 0.545      | 1.008              |
| hsa-miR-631      | 0.002636          | 0.004579          | 0.507      | 1.095              |
| hsa-miR-302d-3p  | 0.002775          | 0.004814          | 0.548      | 0.989              |
| hsa-miR-3622b-5p | 0.002990          | 0.005179          | 0.540      | 1.017              |
| hsa-miR-877-5p   | 0.003024          | 0.005231          | 0.554      | 1.260              |
| hsa-miR-3131     | 0.003264          | 0.005637          | 0.592      | 1.371              |
| hsa-miR-367-3p   | 0.003294          | 0.005680          | 0.533      | 1.010              |
| hsa-miR-3656     | 0.003404          | 0.005861          | 0.541      | 1.252              |
| hsa-miR-516a-3p  | 0.003416          | 0.005874          | 0.535      | 1.009              |

| <b>miRNA</b>     | <b>ttest_rawp</b> | <b>ttest_adjp</b> | <b>AUC</b> | <b>fold_change</b> |
|------------------|-------------------|-------------------|------------|--------------------|
| hsa-miR-512-5p   | 0.003607          | 0.006193          | 0.538      | 0.992              |
| hsa-miR-3607-5p  | 0.003752          | 0.006433          | 0.508      | 0.964              |
| hsa-miR-433-3p   | 0.003882          | 0.006646          | 0.518      | 1.020              |
| hsa-miR-1825     | 0.003990          | 0.006821          | 0.540      | 1.021              |
| hsa-miR-3618     | 0.004062          | 0.006935          | 0.544      | 1.007              |
| hsa-miR-23b-5p   | 0.004106          | 0.006999          | 0.522      | 1.013              |
| hsa-miR-1205     | 0.004122          | 0.007017          | 0.542      | 0.993              |
| hsa-miR-3191-3p  | 0.004225          | 0.007182          | 0.536      | 1.006              |
| hsa-miR-302e     | 0.004468          | 0.007583          | 0.545      | 0.992              |
| hsa-miR-3919     | 0.004514          | 0.007650          | 0.530      | 1.007              |
| hsa-let-7b-5p    | 0.004673          | 0.007908          | 0.531      | 1.129              |
| hsa-miR-221-3p   | 0.004763          | 0.008049          | 0.529      | 0.942              |
| hsa-miR-3688-3p  | 0.004815          | 0.008125          | 0.536      | 1.015              |
| hsa-miR-3164     | 0.004832          | 0.008142          | 0.549      | 1.010              |
| hsa-miR-576-3p   | 0.004865          | 0.008187          | 0.526      | 1.014              |
| hsa-miR-526b-3p  | 0.004955          | 0.008326          | 0.562      | 0.985              |
| hsa-miR-3649     | 0.004993          | 0.008378          | 0.547      | 0.994              |
| hsa-miR-4278     | 0.005034          | 0.008435          | 0.538      | 0.993              |
| hsa-miR-181a-3p  | 0.005123          | 0.008572          | 0.550      | 0.967              |
| hsa-miR-302a-3p  | 0.005186          | 0.008665          | 0.569      | 0.972              |
| hsa-miR-136-5p   | 0.005280          | 0.008800          | 0.536      | 0.970              |
| hsa-miR-4265     | 0.005281          | 0.008800          | 0.548      | 0.993              |
| hsa-miR-3128     | 0.005349          | 0.008901          | 0.544      | 0.991              |
| hsa-miR-718      | 0.005409          | 0.008987          | 0.560      | 2.272              |
| hsa-miR-3622b-3p | 0.005623          | 0.009324          | 0.558      | 0.980              |
| hsa-miR-196a-3p  | 0.005627          | 0.009324          | 0.522      | 1.014              |
| hsa-miR-1203     | 0.005655          | 0.009356          | 0.513      | 1.010              |
| hsa-miR-518e-3p  | 0.005704          | 0.009425          | 0.543      | 0.992              |
| hsa-miR-3126-3p  | 0.005744          | 0.009477          | 0.539      | 0.993              |
| hsa-miR-541-3p   | 0.005996          | 0.009879          | 0.535      | 1.007              |
| hsa-miR-151a-5p  | 0.006005          | 0.009880          | 0.584      | 1.110              |
| hsa-miR-3909     | 0.006027          | 0.009903          | 0.529      | 1.007              |
| hsa-miR-3129-5p  | 0.006220          | 0.010206          | 0.534      | 0.991              |
| hsa-miR-3158-3p  | 0.006278          | 0.010274          | 0.541      | 0.992              |
| hsa-miR-3675-3p  | 0.006279          | 0.010274          | 0.543      | 1.040              |
| hsa-miR-573      | 0.006397          | 0.010453          | 0.536      | 1.007              |
| hsa-miR-4295     | 0.006409          | 0.010457          | 0.533      | 1.009              |
| hsa-miR-499a-3p  | 0.006777          | 0.011043          | 0.527      | 1.008              |
| hsa-miR-33b-5p   | 0.007344          | 0.011950          | 0.537      | 1.007              |
| hsa-miR-4319     | 0.007402          | 0.012028          | 0.518      | 1.012              |
| hsa-miR-30c-2-3p | 0.007598          | 0.012331          | 0.526      | 1.022              |
| hsa-let-7c-5p    | 0.007805          | 0.012640          | 0.530      | 1.194              |
| hsa-miR-623      | 0.007810          | 0.012640          | 0.523      | 1.131              |
| hsa-miR-676-3p   | 0.007902          | 0.012771          | 0.537      | 1.007              |
| hsa-miR-3170     | 0.008031          | 0.012961          | 0.511      | 0.958              |
| hsa-miR-3167     | 0.008156          | 0.013144          | 0.527      | 0.992              |



| <b>miRNA</b>    | <b>ttest_rawp</b> | <b>ttest_adjp</b> | <b>AUC</b> | <b>fold_change</b> |
|-----------------|-------------------|-------------------|------------|--------------------|
| hsa-miR-3184-5p | 0.008177          | 0.013161          | 0.543      | 0.994              |
| hsa-miR-522-3p  | 0.008276          | 0.013303          | 0.530      | 0.987              |
| hsa-miR-217     | 0.008342          | 0.013391          | 0.530      | 1.006              |
| hsa-miR-325     | 0.008391          | 0.013451          | 0.531      | 1.008              |
| hsa-miR-4321    | 0.008617          | 0.013794          | 0.524      | 0.990              |
| hsa-miR-1272    | 0.008717          | 0.013924          | 0.528      | 1.006              |
| hsa-miR-592     | 0.008721          | 0.013924          | 0.549      | 1.006              |
| hsa-miR-339-3p  | 0.008837          | 0.014090          | 0.534      | 1.109              |
| hsa-miR-200c-5p | 0.008954          | 0.014256          | 0.540      | 0.993              |
| hsa-miR-638     | 0.008997          | 0.014306          | 0.545      | 1.257              |
| hsa-miR-548x-3p | 0.009041          | 0.014356          | 0.509      | 0.977              |
| hsa-miR-302a-5p | 0.009061          | 0.014369          | 0.543      | 0.993              |
| hsa-miR-10a-3p  | 0.009593          | 0.015192          | 0.528      | 1.007              |
| hsa-miR-1179    | 0.009905          | 0.015664          | 0.530      | 0.991              |
| hsa-miR-891a-5p | 0.009961          | 0.015732          | 0.544      | 0.993              |
| hsa-miR-3163    | 0.010262          | 0.016186          | 0.539      | 0.955              |
| hsa-miR-224-5p  | 0.010276          | 0.016187          | 0.572      | 0.984              |
| hsa-miR-555     | 0.010517          | 0.016545          | 0.530      | 1.007              |
| hsa-miR-211-5p  | 0.010569          | 0.016605          | 0.507      | 0.888              |
| hsa-miR-182-3p  | 0.010885          | 0.017078          | 0.542      | 0.993              |
| hsa-miR-187-5p  | 0.011031          | 0.017284          | 0.543      | 1.404              |
| hsa-miR-137     | 0.011347          | 0.017755          | 0.529      | 1.007              |
| hsa-miR-363-5p  | 0.011369          | 0.017755          | 0.527      | 1.016              |
| hsa-miR-3171    | 0.011376          | 0.017755          | 0.506      | 0.982              |
| hsa-miR-202-5p  | 0.011411          | 0.017786          | 0.530      | 0.983              |
| hsa-miR-124-5p  | 0.011686          | 0.018190          | 0.540      | 0.994              |
| hsa-miR-1827    | 0.011866          | 0.018447          | 0.518      | 0.990              |
| hsa-miR-208b-3p | 0.011900          | 0.018474          | 0.565      | 1.001              |
| hsa-miR-1245a   | 0.012037          | 0.018663          | 0.531      | 1.007              |
| hsa-miR-885-5p  | 0.012131          | 0.018784          | 0.504      | 0.503              |
| hsa-miR-759     | 0.012219          | 0.018895          | 0.530      | 1.006              |
| hsa-miR-616-5p  | 0.012946          | 0.019994          | 0.517      | 1.009              |
| hsa-miR-222-5p  | 0.013176          | 0.020323          | 0.535      | 0.994              |
| hsa-miR-1322    | 0.013299          | 0.020485          | 0.528      | 1.009              |
| hsa-miR-143-5p  | 0.013336          | 0.020516          | 0.530      | 0.991              |
| hsa-miR-34a-3p  | 0.013577          | 0.020859          | 0.542      | 0.993              |
| hsa-miR-944     | 0.013946          | 0.021398          | 0.539      | 1.006              |
| hsa-miR-4262    | 0.014427          | 0.022107          | 0.527      | 0.994              |
| hsa-miR-1236-3p | 0.014484          | 0.022166          | 0.529      | 0.980              |
| hsa-miR-4306    | 0.014931          | 0.022821          | 0.565      | 1.172              |
| hsa-miR-4260    | 0.015190          | 0.023187          | 0.510      | 1.009              |
| hsa-miR-1206    | 0.015452          | 0.023556          | 0.532      | 1.007              |
| hsa-miR-767-3p  | 0.015887          | 0.024188          | 0.540      | 1.017              |
| hsa-miR-449a    | 0.016074          | 0.024442          | 0.562      | 0.988              |
| hsa-miR-1915-5p | 0.016246          | 0.024672          | 0.522      | 1.162              |
| hsa-miR-149-3p  | 0.016357          | 0.024808          | 0.531      | 1.024              |

| <b>miRNA</b>      | <b>ttest_rawp</b> | <b>ttest_adjp</b> | <b>AUC</b> | <b>fold_change</b> |
|-------------------|-------------------|-------------------|------------|--------------------|
| hsa-miR-1261      | 0.016518          | 0.025020          | 0.523      | 0.994              |
| hsa-miR-876-5p    | 0.016645          | 0.025180          | 0.558      | 1.008              |
| hsa-miR-3190-5p   | 0.016827          | 0.025423          | 0.521      | 1.036              |
| hsa-miR-3136-5p   | 0.017715          | 0.026731          | 0.522      | 1.010              |
| hsa-miR-191-5p    | 0.018458          | 0.027816          | 0.553      | 0.981              |
| hsa-miR-187-3p    | 0.018495          | 0.027837          | 0.530      | 1.006              |
| hsa-miR-619-3p    | 0.018646          | 0.028029          | 0.532      | 1.005              |
| hsa-miR-3200-5p   | 0.018869          | 0.028327          | 0.527      | 0.957              |
| hsa-miR-510-5p    | 0.019177          | 0.028754          | 0.532      | 0.995              |
| hsa-miR-513c-5p   | 0.019316          | 0.028925          | 0.537      | 1.021              |
| hsa-miR-412-3p    | 0.019516          | 0.029187          | 0.525      | 0.995              |
| hsa-miR-122-3p    | 0.019613          | 0.029296          | 0.514      | 0.981              |
| hsa-miR-4292      | 0.019967          | 0.029787          | 0.536      | 0.994              |
| hsa-miR-490-5p    | 0.020481          | 0.030515          | 0.525      | 1.009              |
| hsa-miR-199a-5p   | 0.020604          | 0.030660          | 0.536      | 1.231              |
| hsa-miR-563       | 0.021159          | 0.031446          | 0.518      | 1.026              |
| hsa-miR-302c-3p   | 0.021428          | 0.031806          | 0.526      | 0.985              |
| hsa-miR-4280      | 0.021812          | 0.032336          | 0.534      | 1.006              |
| hsa-miR-513a-3p   | 0.021873          | 0.032386          | 0.548      | 0.994              |
| hsa-miR-30b-3p    | 0.022010          | 0.032548          | 0.520      | 1.012              |
| hsa-miR-340-3p    | 0.022461          | 0.033173          | 0.528      | 0.918              |
| hsa-miR-551a      | 0.022599          | 0.033334          | 0.528      | 0.993              |
| hsa-miR-125b-2-3p | 0.023119          | 0.034060          | 0.532      | 0.994              |
| hsa-miR-346       | 0.023181          | 0.034109          | 0.543      | 0.985              |
| hsa-miR-34a-5p    | 0.023412          | 0.034405          | 0.503      | 1.241              |
| hsa-miR-3681-5p   | 0.023874          | 0.035041          | 0.525      | 1.006              |
| hsa-miR-571       | 0.024498          | 0.035912          | 0.556      | 1.021              |
| hsa-miR-183-3p    | 0.026137          | 0.038268          | 0.531      | 1.073              |
| hsa-miR-626       | 0.027384          | 0.040043          | 0.531      | 1.007              |
| hsa-miR-500b-5p   | 0.027776          | 0.040567          | 0.545      | 1.161              |
| hsa-miR-1256      | 0.027820          | 0.040582          | 0.530      | 0.993              |
| hsa-miR-218-5p    | 0.028199          | 0.041084          | 0.566      | 0.893              |
| hsa-miR-380-5p    | 0.028340          | 0.041237          | 0.524      | 1.006              |
| hsa-miR-519e-3p   | 0.028723          | 0.041743          | 0.537      | 0.975              |
| hsa-miR-432-5p    | 0.029380          | 0.042647          | 0.527      | 0.978              |
| hsa-miR-18b-3p    | 0.029991          | 0.043479          | 0.526      | 1.103              |
| hsa-miR-1292-5p   | 0.030795          | 0.044590          | 0.526      | 0.993              |
| hsa-miR-3922-3p   | 0.031208          | 0.045127          | 0.534      | 0.987              |
| hsa-miR-483-3p    | 0.031241          | 0.045127          | 0.545      | 0.893              |
| hsa-miR-92a-1-5p  | 0.032657          | 0.047114          | 0.521      | 1.008              |
| hsa-miR-3677-3p   | 0.033393          | 0.048118          | 0.522      | 1.012              |
| hsa-miR-802       | 0.034098          | 0.049073          | 0.530      | 1.006              |
| hsa-miR-761       | 0.034154          | 0.049094          | 0.529      | 1.005              |
| hsa-miR-614       | 0.034810          | 0.049976          | 0.533      | 0.994              |
| hsa-miR-1247-5p   | 0.035377          | 0.050729          | 0.503      | 1.012              |
| hsa-miR-520c-3p   | 0.035693          | 0.051119          | 0.568      | 0.985              |

| <b>miRNA</b>    | <b>ttest_rawp</b> | <b>ttest_adjp</b> | <b>AUC</b> | <b>fold_change</b> |
|-----------------|-------------------|-------------------|------------|--------------------|
| hsa-miR-4301    | 0.035762          | 0.051157          | 0.536      | 0.994              |
| hsa-miR-578     | 0.037420          | 0.053464          | 0.526      | 1.006              |
| hsa-miR-374b-3p | 0.037799          | 0.053940          | 0.525      | 1.008              |
| hsa-miR-645     | 0.038080          | 0.054275          | 0.535      | 1.005              |
| hsa-miR-3149    | 0.038188          | 0.054363          | 0.519      | 1.150              |
| hsa-miR-3671    | 0.039019          | 0.055480          | 0.520      | 0.994              |
| hsa-miR-4330    | 0.039826          | 0.056559          | 0.524      | 1.005              |
| hsa-miR-181d-5p | 0.040587          | 0.057571          | 0.539      | 0.939              |
| hsa-miR-548a-5p | 0.040761          | 0.057749          | 0.541      | 1.007              |
| hsa-miR-4304    | 0.042563          | 0.060230          | 0.508      | 1.059              |
| hsa-miR-1243    | 0.044017          | 0.062213          | 0.528      | 1.004              |
| hsa-miR-200a-5p | 0.044494          | 0.062811          | 0.522      | 1.006              |
| hsa-miR-3165    | 0.045045          | 0.063513          | 0.526      | 0.995              |
| hsa-miR-3139    | 0.046101          | 0.064926          | 0.524      | 1.005              |
| hsa-miR-203a-3p | 0.046940          | 0.066029          | 0.531      | 1.021              |
| hsa-miR-409-3p  | 0.047829          | 0.067199          | 0.521      | 1.149              |
| hsa-miR-2113    | 0.048018          | 0.067385          | 0.537      | 0.990              |
| hsa-miR-548i    | 0.048563          | 0.068049          | 0.529      | 0.994              |
| hsa-miR-24-1-5p | 0.048606          | 0.068049          | 0.527      | 0.993              |
| hsa-miR-519d-3p | 0.049243          | 0.068858          | 0.556      | 0.984              |
| hsa-miR-149-5p  | 0.049778          | 0.069489          | 0.519      | 1.025              |
| hsa-miR-1279    | 0.049811          | 0.069489          | 0.525      | 0.991              |
| hsa-miR-3941    | 0.049991          | 0.069657          | 0.529      | 0.995              |
| hsa-miR-3913-5p | 0.050456          | 0.070222          | 0.533      | 0.996              |
| hsa-miR-200c-3p | 0.050939          | 0.070812          | 0.527      | 1.130              |
| hsa-miR-4293    | 0.051062          | 0.070899          | 0.532      | 0.996              |
| hsa-miR-30c-5p  | 0.051525          | 0.071458          | 0.523      | 1.036              |
| hsa-miR-3143    | 0.052723          | 0.073034          | 0.520      | 1.006              |
| hsa-miR-1251-5p | 0.053266          | 0.073700          | 0.529      | 0.996              |
| hsa-miR-141-3p  | 0.055719          | 0.077004          | 0.652      | 1.157              |
| hsa-miR-569     | 0.057023          | 0.078714          | 0.534      | 1.005              |
| hsa-miR-1267    | 0.059226          | 0.081660          | 0.530      | 1.006              |
| hsa-miR-544a    | 0.060041          | 0.082626          | 0.538      | 1.012              |
| hsa-miR-27b-5p  | 0.060067          | 0.082626          | 0.520      | 1.005              |
| hsa-miR-3912-3p | 0.060295          | 0.082844          | 0.523      | 1.005              |
| hsa-miR-92b-5p  | 0.061752          | 0.084747          | 0.509      | 1.006              |
| hsa-miR-150-5p  | 0.062483          | 0.085652          | 0.565      | 1.210              |
| hsa-miR-103b    | 0.063640          | 0.087137          | 0.515      | 1.011              |
| hsa-miR-3690    | 0.063737          | 0.087169          | 0.519      | 1.009              |
| hsa-miR-1253    | 0.064406          | 0.087981          | 0.528      | 0.995              |
| hsa-miR-1250-5p | 0.065499          | 0.089372          | 0.518      | 0.996              |
| hsa-miR-29a-3p  | 0.067276          | 0.091691          | 0.529      | 1.061              |
| hsa-miR-649     | 0.067474          | 0.091855          | 0.516      | 1.005              |
| hsa-miR-3924    | 0.069888          | 0.095032          | 0.543      | 0.995              |
| hsa-miR-2909    | 0.070508          | 0.095765          | 0.524      | 1.006              |
| hsa-miR-3148    | 0.071199          | 0.096592          | 0.558      | 1.052              |

| <b>miRNA</b>      | <b>ttest_rawp</b> | <b>ttest_adjp</b> | <b>AUC</b> | <b>fold_change</b> |
|-------------------|-------------------|-------------------|------------|--------------------|
| hsa-miR-548v      | 0.074522          | 0.100984          | 0.528      | 0.972              |
| hsa-let-7e-5p     | 0.074687          | 0.101093          | 0.514      | 1.487              |
| hsa-miR-517-5p    | 0.075212          | 0.101687          | 0.526      | 0.996              |
| hsa-miR-634       | 0.075345          | 0.101751          | 0.524      | 1.023              |
| hsa-miR-181a-2-3p | 0.075839          | 0.102301          | 0.531      | 1.032              |
| hsa-miR-4269      | 0.078338          | 0.105483          | 0.533      | 1.006              |
| hsa-miR-1912      | 0.078377          | 0.105483          | 0.526      | 1.004              |
| hsa-miR-652-3p    | 0.078648          | 0.105728          | 0.569      | 1.061              |
| hsa-miR-3653-3p   | 0.080317          | 0.107849          | 0.546      | 1.219              |
| hsa-miR-455-3p    | 0.081179          | 0.108883          | 0.581      | 1.014              |
| hsa-miR-134-5p    | 0.081619          | 0.109350          | 0.519      | 2.831              |
| hsa-miR-3130-5p   | 0.082846          | 0.110867          | 0.514      | 1.014              |
| hsa-miR-1293      | 0.085480          | 0.114263          | 0.516      | 1.005              |
| hsa-miR-297       | 0.085989          | 0.114814          | 0.524      | 1.005              |
| hsa-let-7b-3p     | 0.087884          | 0.117212          | 0.511      | 0.917              |
| hsa-miR-323b-3p   | 0.090648          | 0.120762          | 0.518      | 1.004              |
| hsa-miR-449b-5p   | 0.090800          | 0.120829          | 0.526      | 0.994              |
| hsa-miR-181c-5p   | 0.092219          | 0.122578          | 0.527      | 1.015              |
| hsa-miR-562       | 0.094867          | 0.125957          | 0.524      | 1.004              |
| hsa-miR-24-3p     | 0.095374          | 0.126488          | 0.504      | 0.996              |
| hsa-miR-891b      | 0.100317          | 0.132895          | 0.515      | 0.995              |
| hsa-miR-2117      | 0.101557          | 0.134308          | 0.515      | 1.004              |
| hsa-miR-876-3p    | 0.101611          | 0.134308          | 0.543      | 1.005              |
| hsa-miR-3122      | 0.101859          | 0.134486          | 0.521      | 1.004              |
| hsa-miR-544b      | 0.102185          | 0.134765          | 0.528      | 1.004              |
| hsa-miR-338-3p    | 0.104014          | 0.137024          | 0.518      | 0.985              |
| hsa-miR-4288      | 0.104239          | 0.137169          | 0.517      | 1.004              |
| hsa-miR-3160-3p   | 0.104493          | 0.137351          | 0.519      | 0.996              |
| hsa-miR-19b-2-5p  | 0.107524          | 0.141177          | 0.529      | 1.007              |
| hsa-miR-10b-5p    | 0.111209          | 0.145854          | 0.509      | 4.309              |
| hsa-miR-3646      | 0.112104          | 0.146865          | 0.508      | 1.085              |
| hsa-miR-3651      | 0.114574          | 0.149934          | 0.536      | 1.071              |
| hsa-miR-640       | 0.117314          | 0.153351          | 0.520      | 0.963              |
| hsa-miR-1258      | 0.118360          | 0.154547          | 0.520      | 0.996              |
| hsa-miR-593-5p    | 0.119234          | 0.155517          | 0.524      | 0.997              |
| hsa-miR-3680-5p   | 0.120806          | 0.157394          | 0.515      | 0.997              |
| hsa-miR-4263      | 0.122804          | 0.159821          | 0.519      | 0.996              |
| hsa-miR-3176      | 0.133610          | 0.173693          | 0.516      | 1.031              |
| hsa-miR-644a      | 0.134933          | 0.175220          | 0.522      | 0.997              |
| hsa-miR-519b-3p   | 0.135427          | 0.175669          | 0.544      | 0.994              |
| hsa-miR-206       | 0.135682          | 0.175807          | 0.513      | 1.009              |
| hsa-miR-1200      | 0.139071          | 0.179996          | 0.513      | 0.996              |
| hsa-miR-3181      | 0.139219          | 0.179996          | 0.506      | 1.011              |
| hsa-miR-3192-5p   | 0.139738          | 0.180470          | 0.513      | 0.996              |
| hsa-miR-369-3p    | 0.140364          | 0.181080          | 0.524      | 1.007              |
| hsa-let-7f-1-3p   | 0.141071          | 0.181794          | 0.513      | 0.988              |

| <b>miRNA</b>      | <b>ttest_rawp</b> | <b>ttest_adjp</b> | <b>AUC</b> | <b>fold_change</b> |
|-------------------|-------------------|-------------------|------------|--------------------|
| hsa-miR-450b-3p   | 0.145750          | 0.187620          | 0.509      | 0.993              |
| hsa-miR-518e-5p   | 0.146184          | 0.187973          | 0.519      | 1.008              |
| hsa-miR-595       | 0.148633          | 0.190915          | 0.566      | 0.881              |
| hsa-miR-3685      | 0.150440          | 0.192931          | 0.504      | 0.991              |
| hsa-miR-33a-3p    | 0.150529          | 0.192931          | 0.526      | 0.995              |
| hsa-miR-548aa     | 0.152172          | 0.194778          | 0.606      | 1.023              |
| hsa-miR-767-5p    | 0.152299          | 0.194778          | 0.518      | 0.996              |
| hsa-miR-219a-1-3p | 0.152880          | 0.195309          | 0.518      | 0.997              |
| hsa-miR-3133      | 0.157418          | 0.200891          | 0.512      | 0.986              |
| hsa-miR-200b-3p   | 0.158159          | 0.201619          | 0.635      | 1.854              |
| hsa-miR-3120-3p   | 0.161585          | 0.205765          | 0.519      | 1.012              |
| hsa-miR-148a-5p   | 0.163466          | 0.207936          | 0.500      | 1.010              |
| hsa-miR-3150a-3p  | 0.166330          | 0.211351          | 0.519      | 1.003              |
| hsa-miR-582-3p    | 0.168236          | 0.213544          | 0.517      | 0.995              |
| hsa-miR-4268      | 0.168654          | 0.213846          | 0.520      | 0.997              |
| hsa-miR-204-5p    | 0.169867          | 0.215153          | 0.508      | 4.360              |
| hsa-miR-31-3p     | 0.173644          | 0.219701          | 0.524      | 0.997              |
| hsa-miR-3687      | 0.174397          | 0.220418          | 0.516      | 1.004              |
| hsa-miR-548f-3p   | 0.175605          | 0.221708          | 0.585      | 0.979              |
| hsa-miR-34c-3p    | 0.176018          | 0.221993          | 0.518      | 0.996              |
| hsa-miR-219a-5p   | 0.177276          | 0.223341          | 0.528      | 0.992              |
| hsa-miR-133b      | 0.178416          | 0.224538          | 0.502      | 1.142              |
| hsa-miR-4294      | 0.181797          | 0.228551          | 0.535      | 0.996              |
| hsa-miR-486-3p    | 0.183799          | 0.230822          | 0.517      | 1.019              |
| hsa-miR-4261      | 0.187055          | 0.234661          | 0.533      | 1.000              |
| hsa-miR-581       | 0.192112          | 0.240715          | 0.511      | 1.004              |
| hsa-miR-100-3p    | 0.192294          | 0.240715          | 0.512      | 1.005              |
| hsa-miR-23c       | 0.192490          | 0.240715          | 0.505      | 1.006              |
| hsa-miR-323a-5p   | 0.192896          | 0.240967          | 0.524      | 0.997              |
| hsa-miR-650       | 0.194251          | 0.242404          | 0.523      | 1.029              |
| hsa-miR-497-3p    | 0.194804          | 0.242838          | 0.523      | 0.997              |
| hsa-miR-2355-5p   | 0.195395          | 0.243318          | 0.536      | 0.994              |
| hsa-miR-4325      | 0.197664          | 0.245885          | 0.525      | 0.997              |
| hsa-miR-3180      | 0.199512          | 0.247751          | 0.514      | 1.003              |
| hsa-miR-3666      | 0.199583          | 0.247751          | 0.514      | 1.003              |
| hsa-miR-376b-3p   | 0.200560          | 0.248703          | 0.519      | 1.005              |
| hsa-miR-4320      | 0.204251          | 0.253015          | 0.517      | 0.997              |
| hsa-miR-507       | 0.209942          | 0.259793          | 0.519      | 1.003              |
| hsa-miR-1324      | 0.214373          | 0.264999          | 0.518      | 0.996              |
| hsa-miR-323a-3p   | 0.216162          | 0.266752          | 0.517      | 0.978              |
| hsa-miR-3178      | 0.216243          | 0.266752          | 0.506      | 1.006              |
| hsa-miR-3683      | 0.217888          | 0.268501          | 0.508      | 0.996              |
| hsa-miR-3613-5p   | 0.220028          | 0.270857          | 0.522      | 0.989              |
| hsa-miR-125b-1-3p | 0.222355          | 0.273437          | 0.522      | 0.990              |
| hsa-miR-16-1-3p   | 0.223141          | 0.274118          | 0.502      | 0.981              |
| hsa-miR-486-5p    | 0.223605          | 0.274403          | 0.523      | 1.024              |

| <b>miRNA</b>     | <b>ttest_rawp</b> | <b>ttest_adjp</b> | <b>AUC</b> | <b>fold_change</b> |
|------------------|-------------------|-------------------|------------|--------------------|
| hsa-miR-633      | 0.224387          | 0.275078          | 0.540      | 1.003              |
| hsa-miR-1470     | 0.230784          | 0.282627          | 0.516      | 0.992              |
| hsa-miR-3119     | 0.232863          | 0.284878          | 0.524      | 1.003              |
| hsa-miR-127-5p   | 0.234188          | 0.286203          | 0.518      | 0.997              |
| hsa-miR-3153     | 0.238394          | 0.291042          | 0.502      | 1.003              |
| hsa-miR-543      | 0.240065          | 0.292780          | 0.514      | 1.033              |
| hsa-miR-596      | 0.245756          | 0.299412          | 0.515      | 1.004              |
| hsa-miR-3145-3p  | 0.248077          | 0.301929          | 0.517      | 1.003              |
| hsa-miR-4296     | 0.249629          | 0.303505          | 0.518      | 1.007              |
| hsa-miR-888-3p   | 0.250531          | 0.304258          | 0.521      | 0.998              |
| hsa-miR-515-5p   | 0.250762          | 0.304258          | 0.503      | 0.992              |
| hsa-miR-3186-3p  | 0.251767          | 0.305164          | 0.528      | 1.006              |
| hsa-miR-548d-5p  | 0.252240          | 0.305424          | 0.540      | 1.095              |
| hsa-miR-875-5p   | 0.253628          | 0.306791          | 0.505      | 0.990              |
| hsa-miR-122-5p   | 0.260641          | 0.314953          | 0.508      | 1.045              |
| hsa-miR-3146     | 0.261101          | 0.315186          | 0.524      | 1.002              |
| hsa-miR-552-3p   | 0.261769          | 0.315671          | 0.501      | 0.997              |
| hsa-miR-3130-3p  | 0.263201          | 0.317075          | 0.513      | 0.997              |
| hsa-miR-411-5p   | 0.266144          | 0.320293          | 0.512      | 0.997              |
| hsa-miR-4267     | 0.267006          | 0.321004          | 0.507      | 1.003              |
| hsa-miR-3689b-3p | 0.267878          | 0.321725          | 0.507      | 0.990              |
| hsa-miR-4283     | 0.269244          | 0.323038          | 0.527      | 0.998              |
| hsa-miR-34c-5p   | 0.272426          | 0.326525          | 0.517      | 1.003              |
| hsa-miR-651-5p   | 0.274044          | 0.328132          | 0.511      | 0.997              |
| hsa-miR-548u     | 0.278746          | 0.333424          | 0.513      | 1.004              |
| hsa-miR-296-3p   | 0.279902          | 0.334468          | 0.511      | 1.002              |
| hsa-miR-513b-5p  | 0.282737          | 0.337515          | 0.501      | 1.038              |
| hsa-miR-600      | 0.283187          | 0.337712          | 0.521      | 0.998              |
| hsa-miR-1178-3p  | 0.284924          | 0.339441          | 0.513      | 0.994              |
| hsa-miR-556-3p   | 0.289209          | 0.344199          | 0.509      | 0.990              |
| hsa-miR-934      | 0.290317          | 0.345170          | 0.519      | 1.002              |
| hsa-miR-99b-3p   | 0.291927          | 0.346737          | 0.506      | 0.972              |
| hsa-miR-1257     | 0.299659          | 0.355563          | 0.513      | 0.997              |
| hsa-miR-519c-3p  | 0.301653          | 0.357571          | 0.521      | 1.004              |
| hsa-miR-200b-5p  | 0.302055          | 0.357688          | 0.505      | 1.004              |
| hsa-miR-1266-5p  | 0.304869          | 0.360660          | 0.501      | 1.003              |
| hsa-miR-708-5p   | 0.305777          | 0.361373          | 0.516      | 0.997              |
| hsa-miR-147a     | 0.307638          | 0.363209          | 0.511      | 1.003              |
| hsa-miR-3938     | 0.310073          | 0.365599          | 0.555      | 1.574              |
| hsa-miR-1227-3p  | 0.310280          | 0.365599          | 0.527      | 0.988              |
| hsa-miR-3622a-3p | 0.313023          | 0.368464          | 0.544      | 0.970              |
| hsa-miR-2277-3p  | 0.321940          | 0.378583          | 0.527      | 1.017              |
| hsa-miR-769-3p   | 0.322648          | 0.379039          | 0.509      | 1.014              |
| hsa-miR-29b-1-5p | 0.323764          | 0.379973          | 0.553      | 1.015              |
| hsa-miR-4252     | 0.324835          | 0.380852          | 0.517      | 0.983              |
| hsa-miR-3664-5p  | 0.326819          | 0.382799          | 0.514      | 1.002              |

| <b>miRNA</b>     | <b>ttest_rawp</b> | <b>ttest_adjp</b> | <b>AUC</b> | <b>fold_change</b> |
|------------------|-------------------|-------------------|------------|--------------------|
| hsa-miR-218-1-3p | 0.330839          | 0.387124          | 0.521      | 0.998              |
| hsa-miR-99a-5p   | 0.331546          | 0.387569          | 0.516      | 1.031              |
| hsa-miR-425-5p   | 0.333013          | 0.388899          | 0.573      | 1.163              |
| hsa-miR-100-5p   | 0.337303          | 0.392953          | 0.512      | 1.048              |
| hsa-miR-708-3p   | 0.337454          | 0.392953          | 0.519      | 0.998              |
| hsa-miR-518d-3p  | 0.337481          | 0.392953          | 0.515      | 0.994              |
| hsa-miR-212-3p   | 0.342509          | 0.398416          | 0.516      | 0.915              |
| hsa-miR-1323     | 0.349582          | 0.406243          | 0.512      | 0.997              |
| hsa-miR-586      | 0.353582          | 0.410483          | 0.516      | 1.004              |
| hsa-miR-550a-3p  | 0.353924          | 0.410483          | 0.505      | 1.073              |
| hsa-miR-3188     | 0.356753          | 0.413123          | 0.526      | 1.734              |
| hsa-miR-607      | 0.356899          | 0.413123          | 0.522      | 1.003              |
| hsa-miR-892a     | 0.359019          | 0.415171          | 0.524      | 0.996              |
| hsa-miR-3670     | 0.361488          | 0.417618          | 0.525      | 0.997              |
| hsa-miR-599      | 0.362201          | 0.418033          | 0.517      | 1.002              |
| hsa-miR-302b-3p  | 0.365667          | 0.421622          | 0.536      | 0.994              |
| hsa-miR-4276     | 0.369713          | 0.425871          | 0.508      | 0.998              |
| hsa-miR-942-5p   | 0.372065          | 0.428164          | 0.501      | 1.081              |
| hsa-miR-503-5p   | 0.375804          | 0.432047          | 0.505      | 1.008              |
| hsa-miR-30a-3p   | 0.382405          | 0.439209          | 0.524      | 1.684              |
| hsa-miR-648      | 0.386219          | 0.443159          | 0.507      | 1.004              |
| hsa-miR-302b-5p  | 0.387444          | 0.444134          | 0.521      | 0.998              |
| hsa-miR-3159     | 0.389185          | 0.445405          | 0.502      | 0.998              |
| hsa-miR-1296-5p  | 0.389306          | 0.445405          | 0.542      | 0.885              |
| hsa-miR-146a-5p  | 0.389775          | 0.445511          | 0.504      | 1.020              |
| hsa-miR-1291     | 0.396222          | 0.452350          | 0.527      | 1.000              |
| hsa-miR-1233-3p  | 0.396523          | 0.452350          | 0.530      | 0.996              |
| hsa-miR-139-3p   | 0.398551          | 0.454226          | 0.528      | 0.997              |
| hsa-miR-617      | 0.399109          | 0.454424          | 0.531      | 0.998              |
| hsa-miR-1306-3p  | 0.404723          | 0.460373          | 0.503      | 0.948              |
| hsa-miR-770-5p   | 0.408953          | 0.464737          | 0.524      | 1.001              |
| hsa-miR-2114-5p  | 0.414878          | 0.471017          | 0.512      | 0.998              |
| hsa-miR-338-5p   | 0.425320          | 0.482040          | 0.526      | 0.982              |
| hsa-miR-670-5p   | 0.425401          | 0.482040          | 0.513      | 0.994              |
| hsa-miR-370-3p   | 0.434183          | 0.491521          | 0.526      | 0.984              |
| hsa-miR-517c-3p  | 0.434842          | 0.491796          | 0.509      | 1.003              |
| hsa-miR-518f-3p  | 0.436421          | 0.493110          | 0.516      | 1.003              |
| hsa-miR-130b-5p  | 0.438009          | 0.494432          | 0.503      | 1.016              |
| hsa-miR-558      | 0.446795          | 0.503869          | 0.509      | 0.998              |
| hsa-miR-1180-3p  | 0.450627          | 0.507706          | 0.507      | 1.022              |
| hsa-miR-224-3p   | 0.453108          | 0.510016          | 0.507      | 0.998              |
| hsa-miR-523-3p   | 0.460700          | 0.518068          | 0.507      | 1.002              |
| hsa-miR-520b     | 0.461772          | 0.518781          | 0.556      | 1.000              |
| hsa-miR-30e-3p   | 0.465084          | 0.522006          | 0.518      | 1.027              |
| hsa-miR-1298-5p  | 0.466434          | 0.523025          | 0.514      | 1.001              |
| hsa-miR-548n     | 0.471223          | 0.527895          | 0.536      | 0.990              |

| <b>miRNA</b>     | <b>ttest_rawp</b> | <b>ttest_adjp</b> | <b>AUC</b> | <b>fold_change</b> |
|------------------|-------------------|-------------------|------------|--------------------|
| hsa-miR-194-3p   | 0.471921          | 0.528176          | 0.512      | 1.001              |
| hsa-miR-589-5p   | 0.483995          | 0.541121          | 0.520      | 0.999              |
| hsa-miR-520e     | 0.484402          | 0.541121          | 0.534      | 0.995              |
| hsa-miR-3189-3p  | 0.485661          | 0.541941          | 0.507      | 1.002              |
| hsa-miR-3935     | 0.486052          | 0.541941          | 0.556      | 0.934              |
| hsa-miR-3144-5p  | 0.487911          | 0.543502          | 0.515      | 1.002              |
| hsa-miR-195-3p   | 0.490067          | 0.545390          | 0.536      | 0.998              |
| hsa-miR-34b-5p   | 0.490983          | 0.545896          | 0.530      | 1.041              |
| hsa-miR-193b-3p  | 0.492784          | 0.547383          | 0.516      | 1.005              |
| hsa-miR-3661     | 0.495214          | 0.549567          | 0.502      | 1.002              |
| hsa-miR-25-5p    | 0.495885          | 0.549796          | 0.515      | 0.998              |
| hsa-miR-3678-5p  | 0.498176          | 0.551819          | 0.511      | 0.999              |
| hsa-miR-205-3p   | 0.499818          | 0.553120          | 0.508      | 1.003              |
| hsa-miR-155-3p   | 0.501954          | 0.554964          | 0.518      | 1.002              |
| hsa-miR-3612     | 0.519144          | 0.573434          | 0.506      | 1.002              |
| hsa-miR-675-5p   | 0.524623          | 0.578945          | 0.513      | 0.999              |
| hsa-miR-3675-5p  | 0.526053          | 0.579982          | 0.501      | 0.999              |
| hsa-miR-3920     | 0.534181          | 0.588395          | 0.510      | 0.993              |
| hsa-miR-181c-3p  | 0.534983          | 0.588730          | 0.513      | 1.015              |
| hsa-miR-4316     | 0.542339          | 0.596240          | 0.513      | 1.001              |
| hsa-miR-2116-5p  | 0.542815          | 0.596240          | 0.506      | 1.001              |
| hsa-miR-383-5p   | 0.550023          | 0.603076          | 0.522      | 1.000              |
| hsa-miR-124-3p   | 0.550058          | 0.603076          | 0.502      | 0.991              |
| hsa-miR-302c-5p  | 0.554406          | 0.607280          | 0.538      | 1.002              |
| hsa-miR-618      | 0.556227          | 0.608711          | 0.520      | 1.000              |
| hsa-miR-3674     | 0.558808          | 0.610970          | 0.509      | 0.999              |
| hsa-miR-2115-3p  | 0.568000          | 0.620446          | 0.501      | 0.999              |
| hsa-miR-26a-2-3p | 0.568698          | 0.620636          | 0.533      | 0.998              |
| hsa-miR-4273     | 0.573023          | 0.624780          | 0.507      | 0.999              |
| hsa-miR-641      | 0.581948          | 0.633927          | 0.501      | 0.992              |
| hsa-miR-553      | 0.596293          | 0.648955          | 0.506      | 1.002              |
| hsa-miR-621      | 0.597438          | 0.649604          | 0.508      | 0.999              |
| hsa-miR-1287-5p  | 0.604741          | 0.656941          | 0.525      | 1.102              |
| hsa-miR-373-3p   | 0.608488          | 0.660404          | 0.505      | 0.988              |
| hsa-miR-675-3p   | 0.610407          | 0.661569          | 0.515      | 0.996              |
| hsa-miR-1271-5p  | 0.610679          | 0.661569          | 0.508      | 0.989              |
| hsa-miR-3680-3p  | 0.612442          | 0.662872          | 0.511      | 1.001              |
| hsa-miR-3157-5p  | 0.616123          | 0.666246          | 0.515      | 0.999              |
| hsa-miR-943      | 0.622635          | 0.672674          | 0.525      | 0.998              |
| hsa-miR-520g-3p  | 0.631476          | 0.680792          | 0.529      | 0.988              |
| hsa-miR-657      | 0.632207          | 0.680792          | 0.504      | 0.998              |
| hsa-miR-3714     | 0.632346          | 0.680792          | 0.521      | 0.998              |
| hsa-miR-3663-5p  | 0.632452          | 0.680792          | 0.519      | 0.998              |
| hsa-miR-4279     | 0.634905          | 0.682811          | 0.522      | 1.003              |
| hsa-miR-302d-5p  | 0.640019          | 0.687686          | 0.504      | 0.999              |
| hsa-miR-4266     | 0.644947          | 0.692100          | 0.506      | 0.999              |



| miRNA           | ttest_rawp | ttest_adjp | AUC   | fold_change |
|-----------------|------------|------------|-------|-------------|
| hsa-miR-2278    | 0.645297   | 0.692100   | 0.547 | 1.033       |
| hsa-miR-3151-5p | 0.646640   | 0.692912   | 0.515 | 0.999       |
| hsa-miR-567     | 0.649752   | 0.695617   | 0.514 | 0.999       |
| hsa-miR-518c-5p | 0.654255   | 0.699804   | 0.508 | 1.005       |
| hsa-miR-1264    | 0.659242   | 0.704502   | 0.504 | 0.989       |
| hsa-miR-489-3p  | 0.666490   | 0.711604   | 0.510 | 0.999       |
| hsa-miR-216a-5p | 0.669514   | 0.714188   | 0.503 | 1.001       |
| hsa-miR-2053    | 0.673709   | 0.718015   | 0.511 | 0.994       |
| hsa-miR-4309    | 0.675386   | 0.719155   | 0.501 | 1.001       |
| hsa-miR-656-3p  | 0.679805   | 0.723210   | 0.502 | 0.997       |
| hsa-miR-135b-5p | 0.681704   | 0.724236   | 0.508 | 0.985       |
| hsa-miR-518c-3p | 0.681994   | 0.724236   | 0.504 | 1.003       |
| hsa-miR-639     | 0.685989   | 0.727825   | 0.501 | 1.002       |
| hsa-miR-1278    | 0.688183   | 0.729498   | 0.504 | 0.997       |
| hsa-miR-676-5p  | 0.690002   | 0.730773   | 0.507 | 0.999       |
| hsa-miR-422a    | 0.695610   | 0.736053   | 0.517 | 0.999       |
| hsa-miR-302f    | 0.702197   | 0.742358   | 0.502 | 1.002       |
| hsa-miR-520f-3p | 0.705733   | 0.745430   | 0.520 | 0.996       |
| hsa-miR-580-3p  | 0.713729   | 0.753204   | 0.510 | 0.999       |
| hsa-miR-377-5p  | 0.720103   | 0.759253   | 0.515 | 0.999       |
| hsa-miR-1538    | 0.726417   | 0.765228   | 0.529 | 0.997       |
| hsa-miR-3921    | 0.729495   | 0.767787   | 0.528 | 0.991       |
| hsa-miR-3713    | 0.737823   | 0.775295   | 0.513 | 1.065       |
| hsa-miR-939-5p  | 0.738164   | 0.775295   | 0.521 | 0.956       |
| hsa-miR-3621    | 0.738595   | 0.775295   | 0.516 | 0.999       |
| hsa-miR-924     | 0.751789   | 0.788445   | 0.509 | 0.972       |
| hsa-miR-3939    | 0.752859   | 0.788869   | 0.507 | 1.001       |
| hsa-miR-3613-3p | 0.753979   | 0.789343   | 0.514 | 0.975       |
| hsa-miR-557     | 0.756932   | 0.791733   | 0.542 | 2.419       |
| hsa-miR-371a-3p | 0.761144   | 0.795436   | 0.510 | 0.995       |
| hsa-miR-25-3p   | 0.763115   | 0.796792   | 0.581 | 1.064       |
| hsa-miR-612     | 0.767157   | 0.799960   | 0.502 | 1.001       |
| hsa-miR-492     | 0.767502   | 0.799960   | 0.507 | 1.001       |
| hsa-miR-190b    | 0.769122   | 0.800943   | 0.517 | 0.996       |
| hsa-miR-1226-3p | 0.777272   | 0.808718   | 0.504 | 1.000       |
| hsa-miR-491-5p  | 0.779181   | 0.809992   | 0.515 | 1.000       |
| hsa-miR-130b-3p | 0.800244   | 0.831157   | 0.529 | 1.028       |
| hsa-miR-509-3p  | 0.803028   | 0.833318   | 0.519 | 1.000       |
| hsa-miR-136-3p  | 0.809266   | 0.839055   | 0.501 | 1.001       |
| hsa-miR-3659    | 0.814130   | 0.843359   | 0.519 | 1.007       |
| hsa-miR-3942-5p | 0.818012   | 0.846639   | 0.502 | 0.999       |
| hsa-miR-1909-5p | 0.819619   | 0.847561   | 0.536 | 0.937       |
| hsa-miR-330-5p  | 0.822946   | 0.850258   | 0.505 | 1.001       |
| hsa-miR-632     | 0.824562   | 0.851184   | 0.509 | 1.000       |
| hsa-miR-887-3p  | 0.834845   | 0.861047   | 0.538 | 1.009       |
| hsa-miR-4317    | 0.841012   | 0.866021   | 0.503 | 1.012       |

| <b>miRNA</b>     | <b>ttest_rawp</b> | <b>ttest_adjp</b> | <b>AUC</b> | <b>fold_change</b> |
|------------------|-------------------|-------------------|------------|--------------------|
| hsa-miR-32-3p    | 0.841132          | 0.866021          | 0.504      | 1.200              |
| hsa-miR-4312     | 0.842178          | 0.866345          | 0.505      | 0.919              |
| hsa-miR-185-5p   | 0.844633          | 0.867751          | 0.538      | 1.077              |
| hsa-miR-1303     | 0.845012          | 0.867751          | 0.524      | 1.000              |
| hsa-miR-554      | 0.858539          | 0.880877          | 0.512      | 1.000              |
| hsa-miR-635      | 0.865033          | 0.886772          | 0.502      | 1.001              |
| hsa-miR-3187-3p  | 0.869491          | 0.890569          | 0.512      | 1.001              |
| hsa-miR-1255a    | 0.872648          | 0.893030          | 0.509      | 0.992              |
| hsa-miR-3169     | 0.875374          | 0.895046          | 0.503      | 1.000              |
| hsa-let-7f-2-3p  | 0.890532          | 0.909758          | 0.528      | 0.995              |
| hsa-miR-96-3p    | 0.896221          | 0.914779          | 0.503      | 1.000              |
| hsa-miR-1913     | 0.899209          | 0.917038          | 0.529      | 1.002              |
| hsa-miR-4302     | 0.901663          | 0.918749          | 0.510      | 1.000              |
| hsa-miR-4300     | 0.905777          | 0.922147          | 0.502      | 1.000              |
| hsa-miR-500a-5p  | 0.908427          | 0.924049          | 0.501      | 1.054              |
| hsa-miR-223-5p   | 0.915390          | 0.930252          | 0.534      | 1.016              |
| hsa-miR-429      | 0.916098          | 0.930252          | 0.554      | 1.051              |
| hsa-miR-155-5p   | 0.921641          | 0.935078          | 0.513      | 1.031              |
| hsa-miR-1193     | 0.924389          | 0.937063          | 0.503      | 1.000              |
| hsa-miR-603      | 0.930699          | 0.942652          | 0.502      | 1.000              |
| hsa-miR-92a-2-5p | 0.932400          | 0.943566          | 0.512      | 1.000              |
| hsa-miR-2355-3p  | 0.936716          | 0.947124          | 0.500      | 1.000              |
| hsa-miR-3168     | 0.940934          | 0.950577          | 0.505      | 1.000              |
| hsa-miR-671-3p   | 0.948531          | 0.957434          | 0.507      | 0.996              |
| hsa-miR-885-3p   | 0.952278          | 0.960396          | 0.509      | 1.000              |
| hsa-miR-642a-5p  | 0.961288          | 0.968251          | 0.509      | 0.998              |
| hsa-miR-549a     | 0.961703          | 0.968251          | 0.501      | 1.000              |
| hsa-miR-200a-3p  | 0.962674          | 0.968404          | 0.605      | 1.243              |
| hsa-miR-27a-5p   | 0.964206          | 0.969122          | 0.507      | 1.000              |
| hsa-miR-95-3p    | 0.971657          | 0.975782          | 0.529      | 1.028              |
| hsa-miR-604      | 0.972793          | 0.976093          | 0.516      | 1.001              |
| hsa-miR-506-3p   | 0.979676          | 0.982167          | 0.504      | 1.000              |
| hsa-miR-664a-3p  | 0.981162          | 0.982823          | 0.501      | 1.080              |
| hsa-miR-3065-3p  | 0.984739          | 0.985572          | 0.502      | 1.000              |
| hsa-miR-488-5p   | 0.999478          | 0.999478          | 0.505      | 1.000              |

**eTable 5. Signatures for the Comparison of Lung Cancer Cases Versus All Other Participants in the Study.** The "largely matched" cohort comprises all samples of our study, which were chosen to have a similar age, gender and smoking status distribution. The "perfectly matched" cohort corresponds to a more stringent comparison, containing only samples for which another sample in the other group could be found, such that gender and smoking status are equal and age differs by at most one year.

| Cohort comparison | miRNA signature                                                                                                                                                                                              |
|-------------------|--------------------------------------------------------------------------------------------------------------------------------------------------------------------------------------------------------------|
| largely matched   | hsa-miR-1202,hsa-miR-1260a,hsa-miR-1260b,hsa-miR-1285-3p,hsa-miR-139-5p,hsa-miR-16-2-3p,hsa-miR-18a-3p,hsa-miR-205-5p,hsa-miR-23b-3p,hsa-miR-3152-3p,hsa-miR-378b,hsa-miR-3907,hsa-miR-551b-3p,hsa-miR-93-3p |
| perfectly matched | hsa-miR-1260b,hsa-miR-1284,hsa-miR-1285-3p,hsa-miR-205-5p,hsa-miR-29c-5p,hsa-miR-30b-5p,hsa-miR-378b,hsa-miR-4282,hsa-miR-452-3p,hsa-miR-888-5p,hsa-miR-93-3p                                                |

**eTable 6. Result Metrics for the Comparison of Lung Cancer Cases Versus Patients With Non-Cancer Lung Diseases**

| miRNA            | ttest_rawp | ttest_adjp | AUC   | fold_change |
|------------------|------------|------------|-------|-------------|
| hsa-miR-17-3p    | 5.87E-154  | 6.94E-151  | 0.899 | 0.317       |
| hsa-miR-18a-5p   | 6.63E-118  | 3.92E-115  | 0.849 | 0.321       |
| hsa-miR-18b-5p   | 3.00E-116  | 1.18E-113  | 0.844 | 0.361       |
| hsa-miR-21-3p    | 2.48E-112  | 7.33E-110  | 0.843 | 0.433       |
| hsa-miR-590-5p   | 1.42E-86   | 3.36E-84   | 0.806 | 0.386       |
| hsa-miR-19a-3p   | 4.09E-86   | 8.07E-84   | 0.843 | 0.431       |
| hsa-miR-106b-5p  | 1.12E-84   | 1.89E-82   | 0.850 | 0.507       |
| hsa-miR-301a-3p  | 1.67E-83   | 2.47E-81   | 0.807 | 0.411       |
| hsa-miR-101-3p   | 1.05E-80   | 1.38E-78   | 0.794 | 0.403       |
| hsa-miR-29b-3p   | 1.56E-79   | 1.84E-77   | 0.809 | 0.532       |
| hsa-miR-660-5p   | 4.94E-78   | 5.31E-76   | 0.811 | 0.517       |
| hsa-miR-320c     | 1.11E-77   | 1.09E-75   | 0.800 | 2.359       |
| hsa-miR-144-3p   | 1.26E-75   | 1.14E-73   | 0.778 | 0.315       |
| hsa-miR-101-5p   | 2.36E-75   | 2.00E-73   | 0.795 | 0.592       |
| hsa-miR-320d     | 6.73E-69   | 5.31E-67   | 0.810 | 2.246       |
| hsa-miR-193a-3p  | 2.10E-67   | 1.55E-65   | 0.792 | 0.750       |
| hsa-miR-625-5p   | 4.71E-66   | 3.27E-64   | 0.815 | 2.079       |
| hsa-miR-320e     | 1.14E-65   | 7.47E-64   | 0.806 | 2.159       |
| hsa-miR-140-5p   | 1.77E-64   | 1.10E-62   | 0.762 | 0.551       |
| hsa-miR-320b     | 2.96E-63   | 1.75E-61   | 0.782 | 2.179       |
| hsa-miR-27a-3p   | 2.80E-62   | 1.58E-60   | 0.766 | 0.566       |
| hsa-miR-15a-3p   | 5.26E-60   | 2.83E-58   | 0.759 | 0.752       |
| hsa-miR-142-3p   | 3.08E-59   | 1.59E-57   | 0.773 | 0.507       |
| hsa-miR-340-5p   | 1.28E-58   | 6.29E-57   | 0.767 | 0.545       |
| hsa-miR-15a-5p   | 6.11E-58   | 2.89E-56   | 0.748 | 0.563       |
| hsa-let-7g-3p    | 7.03E-57   | 3.20E-55   | 0.793 | 0.917       |
| hsa-miR-193a-5p  | 5.37E-56   | 2.35E-54   | 0.746 | 1.421       |
| hsa-miR-4282     | 1.09E-55   | 4.62E-54   | 0.753 | 1.060       |
| hsa-miR-30e-5p   | 5.55E-55   | 2.26E-53   | 0.761 | 0.660       |
| hsa-miR-338-3p   | 8.91E-55   | 3.51E-53   | 0.752 | 0.560       |
| hsa-miR-20a-5p   | 5.75E-54   | 2.19E-52   | 0.738 | 0.545       |
| hsa-miR-144-5p   | 2.36E-52   | 8.74E-51   | 0.730 | 0.524       |
| hsa-miR-29c-3p   | 5.70E-52   | 2.04E-50   | 0.776 | 0.596       |
| hsa-miR-423-5p   | 8.13E-49   | 2.83E-47   | 0.755 | 1.868       |
| hsa-miR-4281     | 6.42E-47   | 2.17E-45   | 0.736 | 6.992       |
| hsa-miR-197-3p   | 6.84E-47   | 2.25E-45   | 0.729 | 1.912       |
| hsa-miR-575      | 8.09E-47   | 2.59E-45   | 0.741 | 1.756       |
| hsa-miR-324-3p   | 4.28E-46   | 1.33E-44   | 0.757 | 1.653       |
| hsa-miR-107      | 2.25E-45   | 6.82E-44   | 0.726 | 0.680       |
| hsa-miR-1285-3p  | 2.75E-45   | 8.14E-44   | 0.778 | 1.536       |
| hsa-miR-320a     | 5.12E-45   | 1.48E-43   | 0.722 | 1.882       |
| hsa-miR-96-5p    | 5.96E-45   | 1.68E-43   | 0.703 | 0.590       |
| hsa-miR-502-5p   | 8.79E-45   | 2.42E-43   | 0.726 | 0.639       |
| hsa-miR-129-2-3p | 1.48E-44   | 3.98E-43   | 0.732 | 1.262       |

| miRNA            | ttest_rawp | ttest_adjp | AUC   | fold_change |
|------------------|------------|------------|-------|-------------|
| hsa-miR-148a-3p  | 7.15E-44   | 1.88E-42   | 0.722 | 0.613       |
| hsa-miR-629-3p   | 8.16E-44   | 2.10E-42   | 0.730 | 1.397       |
| hsa-let-7i-3p    | 1.10E-43   | 2.78E-42   | 0.721 | 0.919       |
| hsa-miR-374a-5p  | 5.47E-43   | 1.35E-41   | 0.718 | 0.566       |
| hsa-miR-126-5p   | 2.40E-42   | 5.80E-41   | 0.737 | 0.663       |
| hsa-miR-126-3p   | 3.22E-42   | 7.61E-41   | 0.678 | 0.682       |
| hsa-miR-20b-5p   | 8.48E-42   | 1.97E-40   | 0.701 | 0.637       |
| hsa-miR-129-1-3p | 7.51E-41   | 1.71E-39   | 0.731 | 1.227       |
| hsa-miR-874-3p   | 1.04E-40   | 2.31E-39   | 0.722 | 1.509       |
| hsa-miR-17-5p    | 2.24E-40   | 4.91E-39   | 0.693 | 0.657       |
| hsa-miR-4284     | 3.35E-40   | 7.20E-39   | 0.710 | 1.590       |
| hsa-miR-424-5p   | 9.29E-40   | 1.96E-38   | 0.714 | 0.591       |
| hsa-miR-584-5p   | 1.99E-38   | 4.08E-37   | 0.721 | 1.595       |
| hsa-miR-188-3p   | 2.00E-38   | 4.08E-37   | 0.713 | 0.890       |
| hsa-miR-181b-5p  | 6.21E-38   | 1.24E-36   | 0.712 | 1.469       |
| hsa-miR-624-5p   | 7.12E-38   | 1.40E-36   | 0.709 | 0.628       |
| hsa-miR-145-5p   | 1.21E-37   | 2.35E-36   | 0.713 | 1.718       |
| hsa-miR-103a-3p  | 6.31E-37   | 1.20E-35   | 0.691 | 0.734       |
| hsa-miR-3914     | 2.40E-36   | 4.51E-35   | 0.716 | 1.047       |
| hsa-miR-2110     | 5.07E-36   | 9.38E-35   | 0.696 | 1.480       |
| hsa-miR-16-5p    | 6.44E-35   | 1.17E-33   | 0.675 | 0.721       |
| hsa-miR-1249-3p  | 2.72E-34   | 4.87E-33   | 0.709 | 3.581       |
| hsa-miR-598-3p   | 2.82E-34   | 4.98E-33   | 0.697 | 0.788       |
| hsa-miR-23b-3p   | 2.46E-33   | 4.27E-32   | 0.728 | 1.561       |
| hsa-miR-3686     | 3.48E-33   | 5.96E-32   | 0.699 | 1.035       |
| hsa-miR-888-5p   | 9.67E-33   | 1.63E-31   | 0.688 | 1.034       |
| hsa-miR-362-3p   | 2.08E-32   | 3.46E-31   | 0.696 | 0.600       |
| hsa-miR-452-3p   | 3.19E-32   | 5.25E-31   | 0.695 | 1.039       |
| hsa-miR-142-5p   | 3.79E-32   | 6.14E-31   | 0.699 | 0.682       |
| hsa-miR-3074-3p  | 7.68E-32   | 1.23E-30   | 0.719 | 0.859       |
| hsa-miR-3134     | 1.14E-31   | 1.80E-30   | 0.686 | 1.042       |
| hsa-miR-363-3p   | 1.28E-31   | 1.99E-30   | 0.664 | 0.721       |
| hsa-miR-181a-5p  | 4.10E-31   | 6.30E-30   | 0.701 | 1.632       |
| hsa-miR-620      | 4.18E-31   | 6.34E-30   | 0.687 | 1.039       |
| hsa-miR-130a-3p  | 5.02E-31   | 7.51E-30   | 0.669 | 0.737       |
| hsa-miR-505-5p   | 8.89E-31   | 1.31E-29   | 0.714 | 1.672       |
| hsa-miR-151a-3p  | 1.35E-30   | 1.97E-29   | 0.697 | 1.843       |
| hsa-miR-1537-3p  | 2.30E-30   | 3.32E-29   | 0.687 | 0.962       |
| hsa-miR-4289     | 3.37E-30   | 4.80E-29   | 0.687 | 0.965       |
| hsa-miR-1914-3p  | 3.44E-30   | 4.85E-29   | 0.689 | 1.583       |
| hsa-miR-4286     | 5.13E-30   | 7.13E-29   | 0.696 | 1.085       |
| hsa-miR-2052     | 5.92E-30   | 8.15E-29   | 0.684 | 1.039       |
| hsa-miR-940      | 1.05E-29   | 1.43E-28   | 0.690 | 2.744       |
| hsa-miR-545-5p   | 5.25E-29   | 7.06E-28   | 0.680 | 1.043       |
| hsa-miR-497-5p   | 6.73E-29   | 8.95E-28   | 0.683 | 0.857       |
| hsa-miR-330-3p   | 8.76E-29   | 1.15E-27   | 0.682 | 1.360       |

| miRNA            | ttest_rawp | ttest_adjp | AUC   | fold_change |
|------------------|------------|------------|-------|-------------|
| hsa-miR-556-5p   | 1.32E-28   | 1.72E-27   | 0.676 | 1.044       |
| hsa-miR-505-3p   | 2.34E-28   | 3.01E-27   | 0.692 | 1.541       |
| hsa-miR-1307-3p  | 4.77E-28   | 6.07E-27   | 0.686 | 1.241       |
| hsa-miR-190a-5p  | 5.03E-28   | 6.33E-27   | 0.684 | 0.781       |
| hsa-miR-191-5p   | 5.31E-28   | 6.62E-27   | 0.686 | 1.308       |
| hsa-miR-139-5p   | 1.90E-27   | 2.34E-26   | 0.680 | 1.284       |
| hsa-miR-3668     | 2.90E-27   | 3.53E-26   | 0.671 | 1.039       |
| hsa-miR-30c-1-3p | 7.42E-26   | 8.96E-25   | 0.657 | 1.092       |
| hsa-miR-381-3p   | 9.31E-26   | 1.11E-24   | 0.725 | 0.874       |
| hsa-miR-139-3p   | 1.15E-25   | 1.36E-24   | 0.699 | 1.182       |
| hsa-miR-23a-3p   | 4.27E-25   | 5.00E-24   | 0.684 | 1.468       |
| hsa-miR-128-3p   | 5.07E-25   | 5.87E-24   | 0.702 | 1.479       |
| hsa-miR-125a-5p  | 2.66E-24   | 3.06E-23   | 0.668 | 1.519       |
| hsa-miR-1284     | 4.31E-24   | 4.91E-23   | 0.677 | 0.959       |
| hsa-miR-26a-1-3p | 5.15E-24   | 5.80E-23   | 0.643 | 0.846       |
| hsa-miR-378b     | 6.01E-24   | 6.71E-23   | 0.684 | 1.281       |
| hsa-miR-1207-5p  | 1.08E-23   | 1.19E-22   | 0.647 | 4.800       |
| hsa-miR-633      | 1.21E-23   | 1.32E-22   | 0.671 | 1.046       |
| hsa-miR-665      | 2.13E-23   | 2.29E-22   | 0.637 | 1.306       |
| hsa-miR-1248     | 2.13E-23   | 2.29E-22   | 0.657 | 1.031       |
| hsa-miR-2861     | 2.15E-23   | 2.29E-22   | 0.654 | 1.899       |
| hsa-miR-3907     | 2.31E-23   | 2.44E-22   | 0.652 | 0.605       |
| hsa-miR-3651     | 2.52E-23   | 2.63E-22   | 0.689 | 1.431       |
| hsa-miR-21-5p    | 3.69E-23   | 3.83E-22   | 0.631 | 0.859       |
| hsa-miR-551b-3p  | 3.87E-23   | 3.98E-22   | 0.702 | 0.934       |
| hsa-miR-99b-5p   | 1.38E-22   | 1.40E-21   | 0.660 | 1.519       |
| hsa-miR-337-5p   | 2.10E-22   | 2.13E-21   | 0.662 | 0.950       |
| hsa-miR-1915-3p  | 2.49E-22   | 2.49E-21   | 0.651 | 5.408       |
| hsa-miR-587      | 2.98E-22   | 2.97E-21   | 0.655 | 1.028       |
| hsa-miR-1180-3p  | 3.34E-22   | 3.29E-21   | 0.647 | 1.214       |
| hsa-miR-766-3p   | 3.48E-22   | 3.40E-21   | 0.647 | 1.488       |
| hsa-miR-19b-1-5p | 4.05E-22   | 3.93E-21   | 0.707 | 0.934       |
| hsa-miR-1268a    | 4.58E-22   | 4.40E-21   | 0.657 | 3.221       |
| hsa-miR-19b-3p   | 4.76E-22   | 4.54E-21   | 0.680 | 0.745       |
| hsa-miR-921      | 5.48E-22   | 5.19E-21   | 0.656 | 1.055       |
| hsa-miR-31-5p    | 5.97E-22   | 5.60E-21   | 0.648 | 0.905       |
| hsa-miR-606      | 6.74E-22   | 6.27E-21   | 0.653 | 1.032       |
| hsa-miR-3618     | 7.06E-22   | 6.52E-21   | 0.652 | 1.027       |
| hsa-miR-300      | 7.70E-22   | 7.06E-21   | 0.684 | 0.966       |
| hsa-miR-1225-5p  | 1.10E-21   | 1.00E-20   | 0.668 | 5.636       |
| hsa-miR-384      | 1.23E-21   | 1.11E-20   | 0.651 | 1.037       |
| hsa-miR-181d-5p  | 1.74E-21   | 1.56E-20   | 0.690 | 1.178       |
| hsa-miR-491-3p   | 2.03E-21   | 1.81E-20   | 0.654 | 0.835       |
| hsa-miR-762      | 2.59E-21   | 2.27E-20   | 0.690 | 5.831       |
| hsa-let-7d-3p    | 2.59E-21   | 2.27E-20   | 0.666 | 0.957       |
| hsa-let-7i-5p    | 2.96E-21   | 2.57E-20   | 0.625 | 0.810       |

| <b>miRNA</b>      | <b>ttest_rawp</b> | <b>ttest_adjp</b> | <b>AUC</b> | <b>fold_change</b> |
|-------------------|-------------------|-------------------|------------|--------------------|
| hsa-miR-133a-3p   | 6.06E-21          | 5.24E-20          | 0.650      | 1.163              |
| hsa-miR-590-3p    | 6.38E-21          | 5.47E-20          | 0.671      | 1.048              |
| hsa-miR-374c-5p   | 7.96E-21          | 6.77E-20          | 0.660      | 0.758              |
| hsa-miR-744-5p    | 1.26E-20          | 1.06E-19          | 0.713      | 1.392              |
| hsa-miR-20b-3p    | 1.27E-20          | 1.06E-19          | 0.654      | 0.974              |
| hsa-miR-219a-1-3p | 1.52E-20          | 1.27E-19          | 0.654      | 0.974              |
| hsa-miR-342-5p    | 2.53E-20          | 2.09E-19          | 0.669      | 1.523              |
| hsa-miR-1252-5p   | 2.66E-20          | 2.18E-19          | 0.646      | 1.037              |
| hsa-miR-3656      | 5.65E-20          | 4.61E-19          | 0.638      | 2.203              |
| hsa-miR-450b-5p   | 7.60E-20          | 6.15E-19          | 0.654      | 1.041              |
| hsa-miR-365a-3p   | 8.21E-20          | 6.61E-19          | 0.671      | 1.447              |
| hsa-miR-423-3p    | 1.10E-19          | 8.78E-19          | 0.655      | 1.277              |
| hsa-miR-93-5p     | 2.21E-19          | 1.76E-18          | 0.620      | 0.782              |
| hsa-miR-548p      | 2.69E-19          | 2.12E-18          | 0.648      | 1.034              |
| hsa-miR-374b-5p   | 3.44E-19          | 2.69E-18          | 0.635      | 0.800              |
| hsa-miR-3179      | 6.42E-19          | 5.00E-18          | 0.640      | 1.081              |
| hsa-miR-3137      | 6.94E-19          | 5.37E-18          | 0.672      | 1.219              |
| hsa-miR-4291      | 7.21E-19          | 5.54E-18          | 0.638      | 0.839              |
| hsa-miR-342-3p    | 7.43E-19          | 5.67E-18          | 0.668      | 1.405              |
| hsa-miR-1255b-5p  | 8.06E-19          | 6.11E-18          | 0.649      | 1.342              |
| hsa-miR-299-3p    | 8.51E-19          | 6.41E-18          | 0.645      | 0.972              |
| hsa-miR-208b-3p   | 1.05E-18          | 7.85E-18          | 0.643      | 1.026              |
| hsa-miR-1973      | 1.22E-18          | 9.08E-18          | 0.650      | 1.707              |
| hsa-miR-379-5p    | 1.48E-18          | 1.10E-17          | 0.634      | 0.955              |
| hsa-miR-642b-3p   | 1.66E-18          | 1.22E-17          | 0.653      | 3.303              |
| hsa-miR-3910      | 1.67E-18          | 1.22E-17          | 0.644      | 1.029              |
| hsa-let-7g-5p     | 2.22E-18          | 1.61E-17          | 0.635      | 0.803              |
| hsa-miR-196b-5p   | 3.01E-18          | 2.17E-17          | 0.648      | 0.779              |
| hsa-miR-454-3p    | 3.11E-18          | 2.23E-17          | 0.640      | 0.764              |
| hsa-miR-770-5p    | 3.45E-18          | 2.46E-17          | 0.637      | 0.919              |
| hsa-miR-3138      | 3.80E-18          | 2.69E-17          | 0.706      | 2.276              |
| hsa-miR-3141      | 4.19E-18          | 2.95E-17          | 0.661      | 4.413              |
| hsa-miR-4323      | 5.29E-18          | 3.71E-17          | 0.634      | 1.322              |
| hsa-miR-629-5p    | 6.14E-18          | 4.28E-17          | 0.674      | 1.331              |
| hsa-miR-7-5p      | 6.45E-18          | 4.46E-17          | 0.629      | 0.754              |
| hsa-miR-3198      | 7.00E-18          | 4.81E-17          | 0.639      | 1.389              |
| hsa-miR-138-1-3p  | 9.13E-18          | 6.25E-17          | 0.639      | 1.036              |
| hsa-miR-1228-3p   | 1.93E-17          | 1.31E-16          | 0.594      | 1.852              |
| hsa-miR-1231      | 2.05E-17          | 1.38E-16          | 0.645      | 1.024              |
| hsa-miR-32-5p     | 2.56E-17          | 1.72E-16          | 0.667      | 0.874              |
| hsa-miR-26a-5p    | 2.70E-17          | 1.80E-16          | 0.647      | 0.823              |
| hsa-miR-568       | 2.95E-17          | 1.96E-16          | 0.638      | 1.031              |
| hsa-miR-1277-3p   | 3.29E-17          | 2.17E-16          | 0.639      | 1.047              |
| hsa-miR-1909-3p   | 4.53E-17          | 2.98E-16          | 0.643      | 0.976              |
| hsa-miR-501-5p    | 5.45E-17          | 3.56E-16          | 0.645      | 1.358              |
| hsa-miR-15b-5p    | 5.87E-17          | 3.81E-16          | 0.620      | 0.824              |

| miRNA           | ttest_rawp | ttest_adjp | AUC   | fold_change |
|-----------------|------------|------------|-------|-------------|
| hsa-miR-1275    | 6.66E-17   | 4.30E-16   | 0.643 | 2.116       |
| hsa-miR-582-5p  | 7.06E-17   | 4.54E-16   | 0.666 | 0.830       |
| hsa-miR-151a-5p | 7.78E-17   | 4.98E-16   | 0.703 | 1.328       |
| hsa-miR-1273e   | 9.39E-17   | 5.97E-16   | 0.635 | 1.178       |
| hsa-miR-374a-3p | 1.16E-16   | 7.31E-16   | 0.645 | 1.047       |
| hsa-miR-3667-3p | 1.58E-16   | 9.94E-16   | 0.640 | 0.971       |
| hsa-miR-216b-5p | 1.59E-16   | 9.94E-16   | 0.631 | 1.028       |
| hsa-miR-3118    | 1.68E-16   | 1.04E-15   | 0.628 | 1.028       |
| hsa-miR-27b-3p  | 1.71E-16   | 1.06E-15   | 0.615 | 0.923       |
| hsa-miR-1262    | 1.74E-16   | 1.07E-15   | 0.632 | 1.030       |
| hsa-miR-155-3p  | 1.96E-16   | 1.20E-15   | 0.652 | 1.041       |
| hsa-miR-1972    | 2.20E-16   | 1.34E-15   | 0.649 | 4.418       |
| hsa-miR-1202    | 2.64E-16   | 1.60E-15   | 0.642 | 3.123       |
| hsa-miR-3180-3p | 2.74E-16   | 1.66E-15   | 0.637 | 1.574       |
| hsa-miR-532-3p  | 2.79E-16   | 1.68E-15   | 0.669 | 1.360       |
| hsa-miR-577     | 2.81E-16   | 1.68E-15   | 0.637 | 1.029       |
| hsa-miR-4270    | 3.52E-16   | 2.09E-15   | 0.672 | 20.658      |
| hsa-miR-3606-5p | 3.63E-16   | 2.15E-15   | 0.638 | 1.044       |
| hsa-miR-148b-5p | 4.75E-16   | 2.80E-15   | 0.620 | 0.853       |
| hsa-miR-361-5p  | 5.06E-16   | 2.96E-15   | 0.651 | 1.336       |
| hsa-miR-183-3p  | 5.67E-16   | 3.30E-15   | 0.643 | 1.259       |
| hsa-miR-26b-5p  | 6.96E-16   | 4.03E-15   | 0.626 | 0.835       |
| hsa-miR-33b-3p  | 7.04E-16   | 4.06E-15   | 0.588 | 1.916       |
| hsa-miR-1911-3p | 1.08E-15   | 6.21E-15   | 0.632 | 0.963       |
| hsa-miR-377-3p  | 1.10E-15   | 6.29E-15   | 0.612 | 0.838       |
| hsa-miR-3121-3p | 1.92E-15   | 1.09E-14   | 0.631 | 1.188       |
| hsa-miR-933     | 2.68E-15   | 1.51E-14   | 0.591 | 1.254       |
| hsa-miR-3653-3p | 4.00E-15   | 2.25E-14   | 0.659 | 1.741       |
| hsa-miR-20a-3p  | 1.10E-14   | 6.15E-14   | 0.636 | 0.821       |
| hsa-miR-574-3p  | 1.25E-14   | 6.97E-14   | 0.638 | 1.345       |
| hsa-miR-22-3p   | 1.26E-14   | 6.97E-14   | 0.665 | 1.203       |
| hsa-miR-3201    | 1.32E-14   | 7.28E-14   | 0.651 | 1.028       |
| hsa-miR-1245a   | 1.33E-14   | 7.33E-14   | 0.625 | 1.025       |
| hsa-miR-448     | 1.59E-14   | 8.70E-14   | 0.627 | 1.033       |
| hsa-miR-3679-3p | 2.76E-14   | 1.51E-13   | 0.610 | 1.234       |
| hsa-miR-195-5p  | 2.78E-14   | 1.51E-13   | 0.622 | 0.864       |
| hsa-miR-30d-3p  | 3.25E-14   | 1.76E-13   | 0.620 | 0.973       |
| hsa-miR-3605-3p | 3.38E-14   | 1.82E-13   | 0.626 | 1.139       |
| hsa-miR-3679-5p | 3.56E-14   | 1.91E-13   | 0.632 | 2.943       |
| hsa-miR-92b-3p  | 3.82E-14   | 2.03E-13   | 0.614 | 1.219       |
| hsa-miR-143-3p  | 4.06E-14   | 2.16E-13   | 0.634 | 0.943       |
| hsa-miR-187-3p  | 4.81E-14   | 2.54E-13   | 0.617 | 1.025       |
| hsa-miR-296-5p  | 5.02E-14   | 2.64E-13   | 0.616 | 1.408       |
| hsa-miR-4313    | 6.74E-14   | 3.53E-13   | 0.592 | 1.389       |
| hsa-miR-4298    | 7.39E-14   | 3.85E-13   | 0.653 | 6.430       |
| hsa-miR-583     | 7.70E-14   | 3.99E-13   | 0.660 | 1.037       |



| miRNA             | ttest_rawp | ttest_adjp | AUC   | fold_change |
|-------------------|------------|------------|-------|-------------|
| hsa-miR-181a-2-3p | 8.24E-14   | 4.26E-13   | 0.629 | 1.156       |
| hsa-miR-4290      | 1.05E-13   | 5.41E-13   | 0.665 | 0.892       |
| hsa-miR-3117-3p   | 1.23E-13   | 6.28E-13   | 0.654 | 0.952       |
| hsa-miR-410-3p    | 1.25E-13   | 6.39E-13   | 0.611 | 0.905       |
| hsa-miR-148b-3p   | 1.48E-13   | 7.50E-13   | 0.619 | 0.798       |
| hsa-miR-571       | 1.77E-13   | 8.94E-13   | 0.674 | 1.096       |
| hsa-miR-125b-1-3p | 2.09E-13   | 1.05E-12   | 0.602 | 1.067       |
| hsa-miR-219a-5p   | 2.25E-13   | 1.13E-12   | 0.626 | 0.934       |
| hsa-miR-208a-3p   | 2.57E-13   | 1.28E-12   | 0.621 | 1.022       |
| hsa-miR-3156-5p   | 2.80E-13   | 1.39E-12   | 0.631 | 1.230       |
| hsa-miR-4299      | 2.82E-13   | 1.40E-12   | 0.632 | 1.409       |
| hsa-miR-3917      | 3.12E-13   | 1.54E-12   | 0.615 | 1.177       |
| hsa-miR-153-3p    | 3.26E-13   | 1.60E-12   | 0.623 | 1.024       |
| hsa-miR-487b-3p   | 3.30E-13   | 1.61E-12   | 0.622 | 0.852       |
| hsa-miR-3944-3p   | 3.36E-13   | 1.63E-12   | 0.623 | 0.979       |
| hsa-miR-103b      | 3.36E-13   | 1.63E-12   | 0.607 | 1.045       |
| hsa-miR-127-3p    | 3.44E-13   | 1.66E-12   | 0.615 | 1.178       |
| hsa-miR-548e-3p   | 4.17E-13   | 2.01E-12   | 0.611 | 0.925       |
| hsa-miR-548g-3p   | 4.77E-13   | 2.28E-12   | 0.647 | 1.057       |
| hsa-miR-3195      | 6.57E-13   | 3.13E-12   | 0.616 | 4.552       |
| hsa-miR-935       | 7.17E-13   | 3.41E-12   | 0.630 | 0.977       |
| hsa-miR-138-2-3p  | 1.09E-12   | 5.17E-12   | 0.618 | 1.145       |
| hsa-miR-3161      | 1.31E-12   | 6.18E-12   | 0.637 | 1.069       |
| hsa-miR-652-3p    | 1.34E-12   | 6.29E-12   | 0.693 | 1.260       |
| hsa-miR-1224-5p   | 1.45E-12   | 6.77E-12   | 0.613 | 1.722       |
| hsa-miR-922       | 1.50E-12   | 7.01E-12   | 0.610 | 1.023       |
| hsa-miR-205-5p    | 1.55E-12   | 7.19E-12   | 0.626 | 1.097       |
| hsa-miR-1322      | 1.64E-12   | 7.59E-12   | 0.615 | 1.028       |
| hsa-miR-3157-5p   | 2.23E-12   | 1.02E-11   | 0.615 | 0.944       |
| hsa-miR-1302      | 2.68E-12   | 1.23E-11   | 0.614 | 1.027       |
| hsa-miR-3665      | 2.91E-12   | 1.33E-11   | 0.598 | 2.102       |
| hsa-miR-183-5p    | 3.02E-12   | 1.38E-11   | 0.582 | 0.919       |
| hsa-miR-3616-5p   | 3.07E-12   | 1.39E-11   | 0.609 | 1.023       |
| hsa-miR-3125      | 3.50E-12   | 1.58E-11   | 0.623 | 1.204       |
| hsa-miR-615-3p    | 3.92E-12   | 1.76E-11   | 0.651 | 0.948       |
| hsa-miR-24-2-5p   | 4.08E-12   | 1.83E-11   | 0.612 | 1.023       |
| hsa-miR-1914-5p   | 4.57E-12   | 2.04E-11   | 0.631 | 0.977       |
| hsa-miR-154-3p    | 5.94E-12   | 2.64E-11   | 0.619 | 0.969       |
| hsa-miR-155-5p    | 6.00E-12   | 2.66E-11   | 0.644 | 1.258       |
| hsa-miR-3926      | 6.15E-12   | 2.71E-11   | 0.640 | 1.344       |
| hsa-miR-3154      | 6.66E-12   | 2.93E-11   | 0.621 | 1.076       |
| hsa-miR-1305      | 6.77E-12   | 2.97E-11   | 0.612 | 1.235       |
| hsa-miR-494-3p    | 7.40E-12   | 3.23E-11   | 0.634 | 1.319       |
| hsa-miR-589-3p    | 1.06E-11   | 4.62E-11   | 0.581 | 1.118       |
| hsa-miR-450a-5p   | 1.12E-11   | 4.85E-11   | 0.631 | 0.921       |
| hsa-miR-1261      | 1.28E-11   | 5.51E-11   | 0.609 | 0.981       |

| miRNA           | ttest_rawp | ttest_adjp | AUC   | fold_change |
|-----------------|------------|------------|-------|-------------|
| hsa-miR-503-5p  | 1.39E-11   | 5.99E-11   | 0.626 | 0.940       |
| hsa-miR-449b-3p | 1.40E-11   | 5.99E-11   | 0.655 | 0.547       |
| hsa-miR-3127-5p | 1.56E-11   | 6.66E-11   | 0.620 | 1.241       |
| hsa-miR-512-3p  | 1.61E-11   | 6.86E-11   | 0.636 | 1.028       |
| hsa-miR-769-5p  | 1.63E-11   | 6.90E-11   | 0.627 | 0.906       |
| hsa-miR-323b-5p | 1.63E-11   | 6.91E-11   | 0.612 | 0.978       |
| hsa-miR-137     | 1.71E-11   | 7.20E-11   | 0.601 | 1.022       |
| hsa-miR-199a-3p | 2.13E-11   | 8.93E-11   | 0.632 | 0.889       |
| hsa-miR-3176    | 2.36E-11   | 9.88E-11   | 0.620 | 1.150       |
| hsa-miR-28-3p   | 2.54E-11   | 1.06E-10   | 0.574 | 1.070       |
| hsa-miR-3140-3p | 2.59E-11   | 1.08E-10   | 0.602 | 0.972       |
| hsa-miR-125a-3p | 4.14E-11   | 1.71E-10   | 0.598 | 1.233       |
| hsa-miR-760     | 4.15E-11   | 1.71E-10   | 0.607 | 1.066       |
| hsa-miR-4271    | 4.54E-11   | 1.87E-10   | 0.639 | 2.153       |
| hsa-miR-192-3p  | 6.54E-11   | 2.68E-10   | 0.596 | 0.848       |
| hsa-miR-1301-3p | 7.14E-11   | 2.90E-10   | 0.596 | 1.033       |
| hsa-miR-515-5p  | 7.14E-11   | 2.90E-10   | 0.608 | 1.038       |
| hsa-miR-376c-3p | 8.06E-11   | 3.26E-10   | 0.584 | 0.811       |
| hsa-miR-548s    | 8.34E-11   | 3.37E-10   | 0.599 | 1.023       |
| hsa-miR-135b-3p | 8.42E-11   | 3.39E-10   | 0.603 | 1.021       |
| hsa-miR-138-5p  | 8.89E-11   | 3.57E-10   | 0.583 | 0.971       |
| hsa-miR-4274    | 8.94E-11   | 3.57E-10   | 0.571 | 1.532       |
| hsa-miR-3675-3p | 9.92E-11   | 3.95E-10   | 0.569 | 1.173       |
| hsa-miR-130b-3p | 1.06E-10   | 4.21E-10   | 0.663 | 1.241       |
| hsa-miR-1183    | 1.18E-10   | 4.66E-10   | 0.615 | 1.741       |
| hsa-miR-656-3p  | 1.19E-10   | 4.71E-10   | 0.613 | 1.039       |
| hsa-miR-654-5p  | 1.23E-10   | 4.84E-10   | 0.605 | 1.039       |
| hsa-miR-1297    | 1.25E-10   | 4.91E-10   | 0.615 | 1.022       |
| hsa-miR-3609    | 1.27E-10   | 4.96E-10   | 0.600 | 1.051       |
| hsa-miR-3152-3p | 1.31E-10   | 5.10E-10   | 0.533 | 1.926       |
| hsa-miR-518f-3p | 1.33E-10   | 5.16E-10   | 0.605 | 1.024       |
| hsa-miR-212-3p  | 1.52E-10   | 5.86E-10   | 0.537 | 0.637       |
| hsa-miR-561-3p  | 2.05E-10   | 7.89E-10   | 0.600 | 1.024       |
| hsa-miR-593-3p  | 2.58E-10   | 9.92E-10   | 0.622 | 0.977       |
| hsa-miR-449c-3p | 2.66E-10   | 1.02E-09   | 0.648 | 0.940       |
| hsa-miR-1206    | 2.73E-10   | 1.04E-09   | 0.598 | 1.021       |
| hsa-miR-625-3p  | 3.54E-10   | 1.35E-09   | 0.592 | 1.095       |
| hsa-miR-432-3p  | 3.70E-10   | 1.40E-09   | 0.597 | 0.977       |
| hsa-miR-24-1-5p | 3.70E-10   | 1.40E-09   | 0.607 | 0.969       |
| hsa-miR-3916    | 3.84E-10   | 1.45E-09   | 0.591 | 0.966       |
| hsa-miR-4254    | 4.63E-10   | 1.74E-09   | 0.628 | 0.805       |
| hsa-miR-409-3p  | 4.80E-10   | 1.80E-09   | 0.596 | 1.442       |
| hsa-miR-3928-3p | 5.03E-10   | 1.88E-09   | 0.603 | 0.984       |
| hsa-miR-214-3p  | 5.54E-10   | 2.06E-09   | 0.597 | 1.047       |
| hsa-miR-4318    | 6.33E-10   | 2.35E-09   | 0.581 | 0.915       |
| hsa-miR-3652    | 7.03E-10   | 2.60E-09   | 0.621 | 1.224       |

| miRNA             | ttest_rawp | ttest_adjp | AUC   | fold_change |
|-------------------|------------|------------|-------|-------------|
| hsa-miR-1976      | 7.33E-10   | 2.70E-09   | 0.569 | 1.203       |
| hsa-miR-545-3p    | 8.49E-10   | 3.12E-09   | 0.597 | 0.958       |
| hsa-miR-301b-3p   | 9.31E-10   | 3.41E-09   | 0.577 | 0.962       |
| hsa-miR-802       | 9.61E-10   | 3.51E-09   | 0.594 | 1.021       |
| hsa-miR-129-5p    | 9.99E-10   | 3.64E-09   | 0.602 | 0.980       |
| hsa-miR-1234-3p   | 1.01E-09   | 3.67E-09   | 0.548 | 1.537       |
| hsa-miR-615-5p    | 1.09E-09   | 3.95E-09   | 0.548 | 1.047       |
| hsa-miR-647       | 1.11E-09   | 4.00E-09   | 0.621 | 0.972       |
| hsa-miR-3611      | 1.17E-09   | 4.20E-09   | 0.613 | 1.031       |
| hsa-miR-193b-3p   | 1.29E-09   | 4.61E-09   | 0.609 | 1.102       |
| hsa-miR-1908-5p   | 1.43E-09   | 5.13E-09   | 0.573 | 1.037       |
| hsa-miR-3196      | 1.52E-09   | 5.43E-09   | 0.602 | 2.567       |
| hsa-miR-509-5p    | 1.59E-09   | 5.66E-09   | 0.591 | 1.040       |
| hsa-miR-369-5p    | 1.73E-09   | 6.13E-09   | 0.630 | 0.887       |
| hsa-miR-100-3p    | 1.79E-09   | 6.32E-09   | 0.590 | 1.024       |
| hsa-miR-622       | 1.80E-09   | 6.35E-09   | 0.574 | 1.435       |
| hsa-miR-664a-5p   | 1.87E-09   | 6.55E-09   | 0.621 | 1.246       |
| hsa-miR-638       | 2.07E-09   | 7.24E-09   | 0.574 | 1.820       |
| hsa-miR-3655      | 2.52E-09   | 8.78E-09   | 0.605 | 0.983       |
| hsa-miR-215-5p    | 2.77E-09   | 9.63E-09   | 0.595 | 0.860       |
| hsa-miR-501-3p    | 2.83E-09   | 9.82E-09   | 0.616 | 1.217       |
| hsa-miR-3115      | 3.47E-09   | 1.20E-08   | 0.618 | 0.969       |
| hsa-miR-4305      | 3.52E-09   | 1.21E-08   | 0.610 | 0.977       |
| hsa-miR-122-3p    | 3.79E-09   | 1.30E-08   | 0.587 | 1.036       |
| hsa-miR-3923      | 3.90E-09   | 1.34E-08   | 0.602 | 1.034       |
| hsa-miR-99a-3p    | 4.04E-09   | 1.38E-08   | 0.590 | 0.982       |
| hsa-miR-219a-2-3p | 4.54E-09   | 1.55E-08   | 0.594 | 0.983       |
| hsa-miR-639       | 4.86E-09   | 1.65E-08   | 0.617 | 0.983       |
| hsa-miR-890       | 6.59E-09   | 2.23E-08   | 0.594 | 1.018       |
| hsa-miR-637       | 7.04E-09   | 2.38E-08   | 0.614 | 0.976       |
| hsa-miR-500a-3p   | 7.21E-09   | 2.42E-08   | 0.599 | 0.926       |
| hsa-miR-936       | 7.21E-09   | 2.42E-08   | 0.619 | 1.062       |
| hsa-miR-146b-5p   | 7.34E-09   | 2.46E-08   | 0.589 | 0.833       |
| hsa-miR-452-5p    | 7.46E-09   | 2.49E-08   | 0.597 | 1.019       |
| hsa-miR-3908      | 8.19E-09   | 2.73E-08   | 0.587 | 1.019       |
| hsa-miR-105-5p    | 8.98E-09   | 2.99E-08   | 0.593 | 0.984       |
| hsa-miR-513a-3p   | 9.33E-09   | 3.09E-08   | 0.580 | 1.020       |
| hsa-miR-3123      | 1.09E-08   | 3.59E-08   | 0.588 | 1.016       |
| hsa-miR-937-3p    | 1.10E-08   | 3.62E-08   | 0.649 | 0.860       |
| hsa-miR-671-5p    | 1.37E-08   | 4.51E-08   | 0.588 | 2.034       |
| hsa-miR-3124-5p   | 1.61E-08   | 5.26E-08   | 0.591 | 1.087       |
| hsa-miR-3672      | 1.85E-08   | 6.04E-08   | 0.588 | 1.022       |
| hsa-miR-361-3p    | 1.93E-08   | 6.31E-08   | 0.613 | 1.346       |
| hsa-miR-3188      | 1.96E-08   | 6.36E-08   | 0.631 | 1.948       |
| hsa-miR-4253      | 1.99E-08   | 6.46E-08   | 0.611 | 1.135       |
| hsa-miR-3200-5p   | 2.27E-08   | 7.33E-08   | 0.611 | 1.316       |

| miRNA           | ttest_rawp | ttest_adjp | AUC   | fold_change |
|-----------------|------------|------------|-------|-------------|
| hsa-miR-371a-5p | 2.43E-08   | 7.84E-08   | 0.594 | 1.210       |
| hsa-miR-2276-3p | 2.98E-08   | 9.59E-08   | 0.588 | 1.492       |
| hsa-miR-1273d   | 3.20E-08   | 1.02E-07   | 0.599 | 1.132       |
| hsa-miR-675-3p  | 3.44E-08   | 1.10E-07   | 0.613 | 0.965       |
| hsa-miR-3164    | 3.86E-08   | 1.23E-07   | 0.593 | 1.025       |
| hsa-miR-298     | 3.87E-08   | 1.23E-07   | 0.599 | 0.977       |
| hsa-miR-1270    | 4.29E-08   | 1.36E-07   | 0.586 | 1.120       |
| hsa-miR-154-5p  | 4.58E-08   | 1.45E-07   | 0.602 | 0.856       |
| hsa-miR-491-5p  | 4.69E-08   | 1.48E-07   | 0.593 | 1.035       |
| hsa-miR-4278    | 5.01E-08   | 1.58E-07   | 0.596 | 0.984       |
| hsa-miR-3130-5p | 5.03E-08   | 1.58E-07   | 0.571 | 1.045       |
| hsa-miR-10b-5p  | 5.50E-08   | 1.72E-07   | 0.617 | 4.689       |
| hsa-miR-3927-3p | 5.74E-08   | 1.79E-07   | 0.589 | 1.018       |
| hsa-miR-3193    | 6.36E-08   | 1.98E-07   | 0.589 | 1.022       |
| hsa-miR-378c    | 6.45E-08   | 2.00E-07   | 0.578 | 1.036       |
| hsa-miR-508-5p  | 6.45E-08   | 2.00E-07   | 0.593 | 0.984       |
| hsa-miR-541-5p  | 7.66E-08   | 2.36E-07   | 0.601 | 0.981       |
| hsa-miR-3945    | 8.06E-08   | 2.48E-07   | 0.638 | 1.993       |
| hsa-miR-3937    | 8.24E-08   | 2.53E-07   | 0.618 | 2.668       |
| hsa-miR-363-5p  | 9.54E-08   | 2.92E-07   | 0.580 | 1.039       |
| hsa-miR-941     | 1.00E-07   | 3.06E-07   | 0.584 | 1.014       |
| hsa-miR-548w    | 1.04E-07   | 3.16E-07   | 0.608 | 0.967       |
| hsa-miR-455-5p  | 1.08E-07   | 3.28E-07   | 0.600 | 0.982       |
| hsa-miR-1237-3p | 1.11E-07   | 3.36E-07   | 0.543 | 1.230       |
| hsa-miR-29a-3p  | 1.26E-07   | 3.81E-07   | 0.591 | 0.898       |
| hsa-miR-3658    | 1.31E-07   | 3.95E-07   | 0.590 | 1.018       |
| hsa-miR-1184    | 1.38E-07   | 4.15E-07   | 0.592 | 0.983       |
| hsa-miR-466     | 1.42E-07   | 4.25E-07   | 0.623 | 0.829       |
| hsa-miR-150-5p  | 1.58E-07   | 4.74E-07   | 0.633 | 1.438       |
| hsa-miR-1471    | 1.63E-07   | 4.86E-07   | 0.612 | 1.700       |
| hsa-miR-185-3p  | 1.76E-07   | 5.25E-07   | 0.590 | 0.980       |
| hsa-miR-627-5p  | 1.85E-07   | 5.51E-07   | 0.573 | 0.831       |
| hsa-miR-548l    | 2.07E-07   | 6.13E-07   | 0.589 | 0.983       |
| hsa-miR-3130-3p | 2.10E-07   | 6.21E-07   | 0.579 | 0.983       |
| hsa-miR-764     | 2.28E-07   | 6.73E-07   | 0.603 | 0.957       |
| hsa-miR-297     | 2.35E-07   | 6.93E-07   | 0.601 | 1.021       |
| hsa-miR-3190-5p | 2.44E-07   | 7.17E-07   | 0.632 | 0.934       |
| hsa-miR-668-3p  | 2.52E-07   | 7.37E-07   | 0.596 | 0.963       |
| hsa-miR-607     | 2.58E-07   | 7.52E-07   | 0.576 | 1.023       |
| hsa-miR-1233-3p | 2.76E-07   | 8.06E-07   | 0.607 | 0.970       |
| hsa-miR-200c-3p | 2.79E-07   | 8.12E-07   | 0.598 | 1.233       |
| hsa-miR-30b-5p  | 2.91E-07   | 8.43E-07   | 0.574 | 0.924       |
| hsa-let-7e-3p   | 2.93E-07   | 8.46E-07   | 0.617 | 0.976       |
| hsa-miR-1290    | 2.99E-07   | 8.64E-07   | 0.588 | 1.187       |
| hsa-miR-338-5p  | 3.46E-07   | 9.97E-07   | 0.539 | 1.052       |
| hsa-miR-23a-5p  | 3.51E-07   | 1.01E-06   | 0.630 | 1.043       |

| <b>miRNA</b>     | <b>ttest_rawp</b> | <b>ttest_adjp</b> | <b>AUC</b> | <b>fold_change</b> |
|------------------|-------------------|-------------------|------------|--------------------|
| hsa-miR-431-5p   | 3.76E-07          | 1.08E-06          | 0.587      | 0.936              |
| hsa-miR-1910-5p  | 3.94E-07          | 1.13E-06          | 0.576      | 0.816              |
| hsa-miR-1226-5p  | 4.22E-07          | 1.20E-06          | 0.590      | 1.111              |
| hsa-miR-3607-5p  | 4.27E-07          | 1.21E-06          | 0.509      | 0.905              |
| hsa-miR-542-3p   | 4.59E-07          | 1.30E-06          | 0.568      | 0.956              |
| hsa-miR-591      | 4.95E-07          | 1.40E-06          | 0.579      | 0.981              |
| hsa-miR-412-3p   | 5.25E-07          | 1.48E-06          | 0.580      | 0.987              |
| hsa-miR-516a-5p  | 5.35E-07          | 1.51E-06          | 0.574      | 1.030              |
| hsa-miR-411-3p   | 5.57E-07          | 1.56E-06          | 0.630      | 0.929              |
| hsa-miR-566      | 5.71E-07          | 1.60E-06          | 0.552      | 1.106              |
| hsa-miR-127-5p   | 5.73E-07          | 1.60E-06          | 0.579      | 0.985              |
| hsa-miR-617      | 6.06E-07          | 1.69E-06          | 0.594      | 1.092              |
| hsa-miR-3943     | 6.28E-07          | 1.75E-06          | 0.555      | 0.972              |
| hsa-miR-1272     | 6.30E-07          | 1.75E-06          | 0.570      | 1.013              |
| hsa-miR-4252     | 7.09E-07          | 1.96E-06          | 0.581      | 0.929              |
| hsa-miR-34b-3p   | 7.27E-07          | 2.01E-06          | 0.603      | 0.794              |
| hsa-miR-597-5p   | 7.51E-07          | 2.07E-06          | 0.587      | 0.984              |
| hsa-miR-181c-3p  | 7.66E-07          | 2.10E-06          | 0.583      | 0.935              |
| hsa-miR-484      | 7.67E-07          | 2.10E-06          | 0.595      | 1.379              |
| hsa-miR-548d-3p  | 8.03E-07          | 2.20E-06          | 0.575      | 0.975              |
| hsa-miR-1299     | 8.35E-07          | 2.28E-06          | 0.628      | 1.253              |
| hsa-miR-576-3p   | 8.44E-07          | 2.30E-06          | 0.566      | 1.027              |
| hsa-miR-339-5p   | 8.57E-07          | 2.33E-06          | 0.573      | 0.830              |
| hsa-miR-3681-3p  | 9.69E-07          | 2.63E-06          | 0.596      | 0.975              |
| hsa-miR-623      | 1.00E-06          | 2.71E-06          | 0.563      | 1.187              |
| hsa-miR-572      | 1.04E-06          | 2.80E-06          | 0.543      | 0.896              |
| hsa-miR-3126-5p  | 1.16E-06          | 3.14E-06          | 0.571      | 1.016              |
| hsa-miR-3924     | 1.24E-06          | 3.34E-06          | 0.642      | 0.988              |
| hsa-miR-3614-3p  | 1.26E-06          | 3.37E-06          | 0.579      | 0.981              |
| hsa-miR-944      | 1.34E-06          | 3.59E-06          | 0.578      | 1.016              |
| hsa-miR-141-3p   | 1.42E-06          | 3.79E-06          | 0.731      | 1.119              |
| hsa-miR-892b     | 1.48E-06          | 3.94E-06          | 0.593      | 1.114              |
| hsa-miR-181a-3p  | 1.51E-06          | 4.02E-06          | 0.583      | 0.889              |
| hsa-miR-3941     | 1.58E-06          | 4.18E-06          | 0.575      | 1.014              |
| hsa-miR-222-3p   | 1.59E-06          | 4.20E-06          | 0.551      | 0.909              |
| hsa-miR-4256     | 1.61E-06          | 4.25E-06          | 0.571      | 1.013              |
| hsa-miR-367-5p   | 1.61E-06          | 4.25E-06          | 0.577      | 1.024              |
| hsa-miR-614      | 1.63E-06          | 4.28E-06          | 0.588      | 0.983              |
| hsa-miR-3615     | 1.64E-06          | 4.30E-06          | 0.554      | 1.062              |
| hsa-miR-29b-2-5p | 1.67E-06          | 4.36E-06          | 0.597      | 0.965              |
| hsa-miR-10a-3p   | 1.73E-06          | 4.53E-06          | 0.566      | 1.015              |
| hsa-miR-550b-3p  | 1.82E-06          | 4.75E-06          | 0.591      | 0.975              |
| hsa-miR-498      | 2.05E-06          | 5.31E-06          | 0.505      | 1.137              |
| hsa-miR-3200-3p  | 2.05E-06          | 5.31E-06          | 0.585      | 0.911              |
| hsa-miR-125b-5p  | 2.19E-06          | 5.67E-06          | 0.571      | 1.416              |
| hsa-miR-2116-5p  | 2.32E-06          | 6.00E-06          | 0.565      | 1.013              |

| miRNA             | ttest_rawp | ttest_adjp | AUC   | fold_change |
|-------------------|------------|------------|-------|-------------|
| hsa-miR-1255a     | 2.46E-06   | 6.34E-06   | 0.596 | 1.045       |
| hsa-miR-425-3p    | 2.58E-06   | 6.62E-06   | 0.521 | 1.232       |
| hsa-miR-876-3p    | 2.63E-06   | 6.74E-06   | 0.595 | 1.020       |
| hsa-miR-487a-3p   | 2.75E-06   | 7.04E-06   | 0.572 | 0.965       |
| hsa-miR-644a      | 2.76E-06   | 7.04E-06   | 0.580 | 0.987       |
| hsa-miR-369-3p    | 2.77E-06   | 7.06E-06   | 0.585 | 1.028       |
| hsa-miR-378a-3p   | 2.98E-06   | 7.59E-06   | 0.660 | 1.391       |
| hsa-miR-3610      | 2.99E-06   | 7.60E-06   | 0.617 | 1.593       |
| hsa-miR-328-3p    | 3.11E-06   | 7.88E-06   | 0.569 | 1.197       |
| hsa-miR-376a-5p   | 3.13E-06   | 7.91E-06   | 0.559 | 0.908       |
| hsa-miR-223-3p    | 3.48E-06   | 8.77E-06   | 0.587 | 0.907       |
| hsa-miR-4311      | 3.54E-06   | 8.92E-06   | 0.565 | 1.026       |
| hsa-miR-374b-3p   | 3.64E-06   | 9.14E-06   | 0.561 | 1.022       |
| hsa-miR-646       | 3.68E-06   | 9.22E-06   | 0.572 | 0.984       |
| hsa-miR-516a-3p   | 3.79E-06   | 9.48E-06   | 0.570 | 1.017       |
| hsa-miR-3920      | 4.02E-06   | 1.00E-05   | 0.597 | 1.034       |
| hsa-miR-103a-2-5p | 4.19E-06   | 1.04E-05   | 0.577 | 0.936       |
| hsa-miR-92a-1-5p  | 4.25E-06   | 1.06E-05   | 0.599 | 0.985       |
| hsa-miR-4258      | 4.54E-06   | 1.13E-05   | 0.593 | 0.974       |
| hsa-miR-4322      | 4.71E-06   | 1.17E-05   | 0.573 | 2.122       |
| hsa-miR-199b-5p   | 4.85E-06   | 1.20E-05   | 0.589 | 0.954       |
| hsa-miR-196b-3p   | 4.89E-06   | 1.21E-05   | 0.610 | 0.970       |
| hsa-miR-601       | 5.14E-06   | 1.26E-05   | 0.607 | 1.137       |
| hsa-miR-493-5p    | 5.29E-06   | 1.30E-05   | 0.596 | 0.958       |
| hsa-miR-2355-5p   | 5.59E-06   | 1.37E-05   | 0.549 | 0.958       |
| hsa-miR-150-3p    | 5.81E-06   | 1.42E-05   | 0.636 | 4.897       |
| hsa-miR-1276      | 5.92E-06   | 1.44E-05   | 0.564 | 1.020       |
| hsa-miR-2053      | 6.54E-06   | 1.59E-05   | 0.588 | 1.040       |
| hsa-miR-3065-5p   | 6.59E-06   | 1.60E-05   | 0.573 | 1.013       |
| hsa-miR-641       | 7.38E-06   | 1.79E-05   | 0.572 | 1.055       |
| hsa-miR-539-5p    | 7.63E-06   | 1.85E-05   | 0.609 | 0.941       |
| hsa-miR-147b      | 8.67E-06   | 2.09E-05   | 0.580 | 0.987       |
| hsa-miR-3663-3p   | 9.24E-06   | 2.23E-05   | 0.632 | 43.590      |
| hsa-miR-548h-5p   | 9.47E-06   | 2.28E-05   | 0.567 | 0.983       |
| hsa-miR-3168      | 1.07E-05   | 2.56E-05   | 0.558 | 1.012       |
| hsa-let-7a-3p     | 1.16E-05   | 2.78E-05   | 0.568 | 1.025       |
| hsa-miR-654-3p    | 1.17E-05   | 2.79E-05   | 0.577 | 0.874       |
| hsa-miR-4314      | 1.47E-05   | 3.51E-05   | 0.647 | 1.039       |
| hsa-miR-3692-3p   | 1.50E-05   | 3.58E-05   | 0.568 | 1.011       |
| hsa-miR-1827      | 1.57E-05   | 3.74E-05   | 0.549 | 0.976       |
| hsa-miR-708-5p    | 1.60E-05   | 3.80E-05   | 0.563 | 1.014       |
| hsa-miR-4297      | 1.61E-05   | 3.81E-05   | 0.624 | 0.907       |
| hsa-miR-3144-5p   | 1.69E-05   | 3.99E-05   | 0.581 | 1.014       |
| hsa-miR-3180-5p   | 1.73E-05   | 4.07E-05   | 0.534 | 1.154       |
| hsa-miR-146b-3p   | 1.76E-05   | 4.15E-05   | 0.578 | 0.986       |
| hsa-miR-1263      | 1.86E-05   | 4.36E-05   | 0.581 | 0.989       |

| <b>miRNA</b>     | <b>ttest_rawp</b> | <b>ttest_adjp</b> | <b>AUC</b> | <b>fold_change</b> |
|------------------|-------------------|-------------------|------------|--------------------|
| hsa-miR-524-3p   | 1.92E-05          | 4.49E-05          | 0.586      | 0.983              |
| hsa-miR-514a-3p  | 1.94E-05          | 4.54E-05          | 0.564      | 1.013              |
| hsa-miR-3929     | 2.08E-05          | 4.84E-05          | 0.567      | 1.013              |
| hsa-miR-4303     | 2.09E-05          | 4.86E-05          | 0.577      | 1.012              |
| hsa-miR-518b     | 2.17E-05          | 5.04E-05          | 0.551      | 1.028              |
| hsa-miR-133b     | 2.34E-05          | 5.42E-05          | 0.554      | 1.286              |
| hsa-miR-4287     | 2.61E-05          | 6.05E-05          | 0.568      | 0.987              |
| hsa-miR-1238-3p  | 2.66E-05          | 6.16E-05          | 0.502      | 1.372              |
| hsa-miR-367-3p   | 2.71E-05          | 6.26E-05          | 0.552      | 1.016              |
| hsa-miR-610      | 2.79E-05          | 6.42E-05          | 0.564      | 1.047              |
| hsa-miR-132-5p   | 2.91E-05          | 6.68E-05          | 0.600      | 0.976              |
| hsa-miR-1226-3p  | 2.94E-05          | 6.74E-05          | 0.557      | 1.016              |
| hsa-miR-514b-3p  | 3.03E-05          | 6.94E-05          | 0.571      | 0.989              |
| hsa-miR-193b-5p  | 3.07E-05          | 7.02E-05          | 0.615      | 1.044              |
| hsa-miR-1193     | 3.27E-05          | 7.44E-05          | 0.574      | 0.990              |
| hsa-miR-3147     | 3.52E-05          | 8.00E-05          | 0.585      | 1.106              |
| hsa-miR-3135a    | 3.55E-05          | 8.06E-05          | 0.561      | 1.014              |
| hsa-miR-643      | 3.78E-05          | 8.58E-05          | 0.546      | 0.983              |
| hsa-miR-3186-3p  | 3.87E-05          | 8.75E-05          | 0.564      | 0.980              |
| hsa-miR-3607-3p  | 4.03E-05          | 9.10E-05          | 0.550      | 1.036              |
| hsa-miR-1250-5p  | 4.12E-05          | 9.29E-05          | 0.552      | 0.987              |
| hsa-miR-135a-3p  | 4.72E-05          | 0.000106          | 0.629      | 1.449              |
| hsa-miR-599      | 5.00E-05          | 0.000112          | 0.568      | 1.013              |
| hsa-miR-4283     | 5.08E-05          | 0.000114          | 0.581      | 0.988              |
| hsa-miR-3116     | 5.10E-05          | 0.000114          | 0.567      | 1.011              |
| hsa-miR-586      | 5.14E-05          | 0.000115          | 0.569      | 1.020              |
| hsa-miR-1911-5p  | 5.33E-05          | 0.000119          | 0.568      | 0.989              |
| hsa-miR-3678-3p  | 5.40E-05          | 0.000120          | 0.562      | 0.987              |
| hsa-miR-548k     | 5.66E-05          | 0.000125          | 0.577      | 0.986              |
| hsa-miR-302d-3p  | 5.66E-05          | 0.000125          | 0.583      | 0.986              |
| hsa-miR-4293     | 5.89E-05          | 0.000130          | 0.565      | 1.012              |
| hsa-miR-758-3p   | 5.95E-05          | 0.000131          | 0.570      | 0.938              |
| hsa-miR-616-3p   | 6.01E-05          | 0.000132          | 0.567      | 1.014              |
| hsa-miR-518e-3p  | 6.19E-05          | 0.000136          | 0.579      | 0.987              |
| hsa-miR-759      | 6.34E-05          | 0.000139          | 0.559      | 1.011              |
| hsa-miR-485-5p   | 6.79E-05          | 0.000149          | 0.565      | 1.014              |
| hsa-miR-550a-5p  | 7.23E-05          | 0.000158          | 0.536      | 1.143              |
| hsa-miR-3189-3p  | 7.32E-05          | 0.000160          | 0.568      | 0.977              |
| hsa-miR-609      | 7.51E-05          | 0.000164          | 0.568      | 0.971              |
| hsa-miR-200c-5p  | 7.59E-05          | 0.000165          | 0.569      | 0.987              |
| hsa-miR-4327     | 8.46E-05          | 0.000184          | 0.604      | 4.964              |
| hsa-miR-19b-2-5p | 8.84E-05          | 0.000192          | 0.563      | 1.022              |
| hsa-miR-302c-5p  | 8.87E-05          | 0.000192          | 0.608      | 0.987              |
| hsa-miR-143-5p   | 8.93E-05          | 0.000193          | 0.568      | 0.988              |
| hsa-miR-3689a-3p | 9.21E-05          | 0.000198          | 0.571      | 0.985              |
| hsa-miR-34c-5p   | 9.60E-05          | 0.000206          | 0.557      | 1.012              |

| <b>miRNA</b>    | <b>ttest_rawp</b> | <b>ttest_adjp</b> | <b>AUC</b> | <b>fold_change</b> |
|-----------------|-------------------|-------------------|------------|--------------------|
| hsa-miR-3918    | 0.000104          | 0.000224          | 0.544      | 1.015              |
| hsa-miR-628-5p  | 0.000106          | 0.000228          | 0.552      | 0.929              |
| hsa-miR-548m    | 0.000107          | 0.000229          | 0.567      | 0.972              |
| hsa-miR-548t-5p | 0.000108          | 0.000230          | 0.594      | 0.981              |
| hsa-miR-136-5p  | 0.000109          | 0.000232          | 0.611      | 0.971              |
| hsa-miR-105-3p  | 0.000109          | 0.000232          | 0.555      | 1.015              |
| hsa-miR-2115-5p | 0.000114          | 0.000241          | 0.578      | 0.956              |
| hsa-miR-134-5p  | 0.000119          | 0.000252          | 0.562      | 3.096              |
| hsa-miR-181c-5p | 0.000129          | 0.000274          | 0.561      | 0.889              |
| hsa-miR-483-5p  | 0.000129          | 0.000274          | 0.610      | 2.109              |
| hsa-miR-375     | 0.000131          | 0.000276          | 0.528      | 1.133              |
| hsa-miR-541-3p  | 0.000133          | 0.000281          | 0.565      | 1.013              |
| hsa-miR-3650    | 0.000134          | 0.000281          | 0.594      | 1.012              |
| hsa-miR-634     | 0.000140          | 0.000295          | 0.516      | 1.096              |
| hsa-miR-190b    | 0.000141          | 0.000295          | 0.582      | 1.019              |
| hsa-miR-767-3p  | 0.000143          | 0.000299          | 0.518      | 1.061              |
| hsa-miR-1271-5p | 0.000151          | 0.000316          | 0.563      | 1.111              |
| hsa-miR-1260b   | 0.000168          | 0.000351          | 0.575      | 1.626              |
| hsa-miR-642a-5p | 0.000176          | 0.000365          | 0.594      | 1.012              |
| hsa-miR-3613-3p | 0.000180          | 0.000373          | 0.513      | 1.096              |
| hsa-miR-569     | 0.000180          | 0.000374          | 0.557      | 1.014              |
| hsa-miR-3617-5p | 0.000197          | 0.000408          | 0.512      | 1.025              |
| hsa-miR-324-5p  | 0.000206          | 0.000426          | 0.591      | 1.213              |
| hsa-miR-99b-3p  | 0.000206          | 0.000426          | 0.530      | 0.913              |
| hsa-miR-3160-3p | 0.000208          | 0.000428          | 0.565      | 0.988              |
| hsa-miR-345-5p  | 0.000211          | 0.000434          | 0.573      | 0.956              |
| hsa-miR-1-3p    | 0.000212          | 0.000435          | 0.577      | 1.018              |
| hsa-miR-1265    | 0.000216          | 0.000441          | 0.561      | 0.983              |
| hsa-miR-3175    | 0.000229          | 0.000469          | 0.559      | 1.009              |
| hsa-miR-3685    | 0.000240          | 0.000490          | 0.556      | 1.018              |
| hsa-miR-514b-5p | 0.000259          | 0.000528          | 0.621      | 1.582              |
| hsa-miR-3183    | 0.000262          | 0.000533          | 0.503      | 1.042              |
| hsa-miR-1273c   | 0.000264          | 0.000536          | 0.615      | 1.025              |
| hsa-miR-3690    | 0.000264          | 0.000536          | 0.568      | 1.021              |
| hsa-miR-3202    | 0.000265          | 0.000536          | 0.606      | 1.529              |
| hsa-miR-1260a   | 0.000266          | 0.000538          | 0.570      | 1.425              |
| hsa-miR-187-5p  | 0.000286          | 0.000577          | 0.618      | 1.425              |
| hsa-miR-543     | 0.000296          | 0.000596          | 0.559      | 1.106              |
| hsa-miR-146a-5p | 0.000298          | 0.000598          | 0.599      | 1.212              |
| hsa-miR-3120-3p | 0.000317          | 0.000635          | 0.569      | 1.040              |
| hsa-miR-30c-5p  | 0.000318          | 0.000636          | 0.562      | 1.240              |
| hsa-miR-585-3p  | 0.000325          | 0.000649          | 0.566      | 0.988              |
| hsa-miR-451a    | 0.000336          | 0.000670          | 0.549      | 0.957              |
| hsa-miR-3614-5p | 0.000341          | 0.000680          | 0.503      | 1.131              |
| hsa-miR-192-5p  | 0.000348          | 0.000692          | 0.558      | 0.921              |
| hsa-miR-3173-3p | 0.000357          | 0.000708          | 0.574      | 1.015              |



| <b>miRNA</b>    | <b>ttest_rawp</b> | <b>ttest_adjp</b> | <b>AUC</b> | <b>fold_change</b> |
|-----------------|-------------------|-------------------|------------|--------------------|
| hsa-miR-221-5p  | 0.000420          | 0.000832          | 0.567      | 0.945              |
| hsa-miR-877-5p  | 0.000428          | 0.000847          | 0.591      | 1.269              |
| hsa-miR-548d-5p | 0.000430          | 0.000849          | 0.512      | 1.205              |
| hsa-miR-556-3p  | 0.000432          | 0.000853          | 0.571      | 1.037              |
| hsa-miR-3149    | 0.000436          | 0.000857          | 0.564      | 1.109              |
| hsa-miR-23b-5p  | 0.000439          | 0.000863          | 0.536      | 1.018              |
| hsa-miR-3659    | 0.000467          | 0.000916          | 0.609      | 0.975              |
| hsa-miR-490-5p  | 0.000477          | 0.000934          | 0.537      | 1.016              |
| hsa-miR-3148    | 0.000502          | 0.000981          | 0.627      | 1.023              |
| hsa-miR-495-3p  | 0.000511          | 0.000997          | 0.555      | 0.890              |
| hsa-miR-3128    | 0.000522          | 0.001017          | 0.555      | 1.015              |
| hsa-miR-892a    | 0.000532          | 0.001035          | 0.550      | 1.018              |
| hsa-miR-574-5p  | 0.000548          | 0.001064          | 0.544      | 2.173              |
| hsa-miR-152-3p  | 0.000549          | 0.001064          | 0.560      | 0.943              |
| hsa-miR-146a-3p | 0.000580          | 0.001124          | 0.549      | 1.013              |
| hsa-miR-4292    | 0.000605          | 0.001170          | 0.563      | 0.988              |
| hsa-miR-653-5p  | 0.000609          | 0.001175          | 0.548      | 1.013              |
| hsa-miR-3662    | 0.000625          | 0.001204          | 0.551      | 1.012              |
| hsa-miR-362-5p  | 0.000631          | 0.001213          | 0.581      | 1.200              |
| hsa-miR-4310    | 0.000641          | 0.001232          | 0.502      | 1.191              |
| hsa-miR-325     | 0.000651          | 0.001248          | 0.551      | 1.012              |
| hsa-miR-196a-3p | 0.000668          | 0.001278          | 0.528      | 1.019              |
| hsa-miR-658     | 0.000669          | 0.001279          | 0.560      | 0.987              |
| hsa-miR-549a    | 0.000672          | 0.001280          | 0.555      | 1.011              |
| hsa-miR-663a    | 0.000672          | 0.001280          | 0.579      | 2.165              |
| hsa-miR-450b-3p | 0.000690          | 0.001312          | 0.573      | 1.015              |
| hsa-miR-27a-5p  | 0.000748          | 0.001420          | 0.554      | 1.010              |
| hsa-miR-3663-5p | 0.000764          | 0.001448          | 0.586      | 0.988              |
| hsa-miR-499a-5p | 0.000779          | 0.001474          | 0.562      | 0.988              |
| hsa-miR-486-3p  | 0.000873          | 0.001651          | 0.586      | 0.980              |
| hsa-miR-1539    | 0.000876          | 0.001652          | 0.506      | 1.184              |
| hsa-miR-186-5p  | 0.000887          | 0.001672          | 0.545      | 1.439              |
| hsa-miR-1295a   | 0.000891          | 0.001676          | 0.560      | 1.026              |
| hsa-miR-551b-5p | 0.000898          | 0.001687          | 0.569      | 1.011              |
| hsa-miR-3162-5p | 0.000909          | 0.001705          | 0.546      | 1.413              |
| hsa-miR-2113    | 0.000926          | 0.001733          | 0.576      | 0.988              |
| hsa-miR-518f-5p | 0.000933          | 0.001743          | 0.573      | 0.990              |
| hsa-miR-1278    | 0.000939          | 0.001750          | 0.562      | 1.016              |
| hsa-miR-1227-3p | 0.000940          | 0.001750          | 0.528      | 1.053              |
| hsa-miR-500a-5p | 0.000942          | 0.001753          | 0.561      | 1.188              |
| hsa-miR-302e    | 0.001048          | 0.001947          | 0.565      | 0.989              |
| hsa-miR-499a-3p | 0.001056          | 0.001958          | 0.541      | 1.011              |
| hsa-miR-184     | 0.001103          | 0.002042          | 0.544      | 1.023              |
| hsa-miR-7-1-3p  | 0.001185          | 0.002191          | 0.553      | 0.922              |
| hsa-miR-346     | 0.001264          | 0.002332          | 0.583      | 0.971              |
| hsa-miR-490-3p  | 0.001266          | 0.002332          | 0.534      | 1.013              |

| <b>miRNA</b>     | <b>ttest_rawp</b> | <b>ttest_adjp</b> | <b>AUC</b> | <b>fold_change</b> |
|------------------|-------------------|-------------------|------------|--------------------|
| hsa-miR-3684     | 0.001267          | 0.002332          | 0.553      | 0.990              |
| hsa-miR-502-3p   | 0.001308          | 0.002403          | 0.548      | 0.987              |
| hsa-miR-3620-3p  | 0.001333          | 0.002445          | 0.503      | 1.129              |
| hsa-miR-92a-2-5p | 0.001353          | 0.002478          | 0.535      | 1.013              |
| hsa-miR-4266     | 0.001367          | 0.002500          | 0.554      | 0.992              |
| hsa-miR-191-3p   | 0.001392          | 0.002541          | 0.526      | 1.294              |
| hsa-miR-581      | 0.001399          | 0.002551          | 0.541      | 1.011              |
| hsa-miR-3186-5p  | 0.001429          | 0.002601          | 0.561      | 0.988              |
| hsa-miR-504-5p   | 0.001436          | 0.002610          | 0.564      | 0.987              |
| hsa-miR-559      | 0.001512          | 0.002744          | 0.604      | 1.006              |
| hsa-miR-323a-5p  | 0.001532          | 0.002775          | 0.558      | 0.990              |
| hsa-miR-3151-5p  | 0.001561          | 0.002824          | 0.556      | 0.989              |
| hsa-miR-3919     | 0.001609          | 0.002905          | 0.542      | 1.010              |
| hsa-miR-708-3p   | 0.001700          | 0.003066          | 0.540      | 1.010              |
| hsa-miR-548b-3p  | 0.001720          | 0.003098          | 0.580      | 0.984              |
| hsa-miR-376a-3p  | 0.001752          | 0.003150          | 0.543      | 0.897              |
| hsa-miR-323a-3p  | 0.001790          | 0.003213          | 0.541      | 1.083              |
| hsa-miR-4257     | 0.001800          | 0.003227          | 0.553      | 1.157              |
| hsa-miR-1298-5p  | 0.001815          | 0.003248          | 0.550      | 0.993              |
| hsa-miR-4272     | 0.001941          | 0.003469          | 0.544      | 1.010              |
| hsa-miR-934      | 0.001945          | 0.003469          | 0.540      | 0.989              |
| hsa-miR-493-3p   | 0.001947          | 0.003469          | 0.567      | 1.014              |
| hsa-miR-576-5p   | 0.001954          | 0.003477          | 0.561      | 0.956              |
| hsa-miR-3934-5p  | 0.002047          | 0.003636          | 0.570      | 1.079              |
| hsa-miR-204-5p   | 0.002063          | 0.003659          | 0.548      | 4.795              |
| hsa-miR-4285     | 0.002101          | 0.003720          | 0.556      | 1.010              |
| hsa-miR-4315     | 0.002121          | 0.003751          | 0.548      | 1.010              |
| hsa-miR-18b-3p   | 0.002156          | 0.003807          | 0.533      | 1.133              |
| hsa-miR-365a-5p  | 0.002221          | 0.003916          | 0.559      | 1.026              |
| hsa-miR-373-5p   | 0.002231          | 0.003928          | 0.539      | 1.028              |
| hsa-miR-4308     | 0.002365          | 0.004157          | 0.556      | 0.990              |
| hsa-miR-509-3-5p | 0.002401          | 0.004214          | 0.541      | 1.010              |
| hsa-miR-4251     | 0.002428          | 0.004255          | 0.594      | 1.018              |
| hsa-miR-1224-3p  | 0.002635          | 0.004611          | 0.558      | 0.984              |
| hsa-miR-3657     | 0.002668          | 0.004662          | 0.541      | 0.986              |
| hsa-miR-3119     | 0.002809          | 0.004902          | 0.551      | 1.010              |
| hsa-miR-3065-3p  | 0.002824          | 0.004920          | 0.555      | 1.008              |
| hsa-miR-3619-5p  | 0.002881          | 0.005012          | 0.564      | 1.008              |
| hsa-miR-548a-3p  | 0.002959          | 0.005140          | 0.538      | 0.986              |
| hsa-miR-30b-3p   | 0.003011          | 0.005224          | 0.577      | 0.986              |
| hsa-miR-608      | 0.003090          | 0.005346          | 0.557      | 0.993              |
| hsa-miR-4326     | 0.003091          | 0.005346          | 0.537      | 1.065              |
| hsa-miR-661      | 0.003131          | 0.005407          | 0.558      | 0.991              |
| hsa-miR-3155a    | 0.003211          | 0.005537          | 0.561      | 1.008              |
| hsa-miR-3621     | 0.003259          | 0.005612          | 0.551      | 1.012              |
| hsa-miR-655-3p   | 0.003308          | 0.005688          | 0.543      | 0.985              |

| <b>miRNA</b>      | <b>ttest_rawp</b> | <b>ttest_adjp</b> | <b>AUC</b> | <b>fold_change</b> |
|-------------------|-------------------|-------------------|------------|--------------------|
| hsa-miR-544a      | 0.003416          | 0.005865          | 0.560      | 1.021              |
| hsa-miR-3126-3p   | 0.003456          | 0.005926          | 0.550      | 0.991              |
| hsa-miR-2115-3p   | 0.003474          | 0.005948          | 0.546      | 1.010              |
| hsa-miR-3144-3p   | 0.003491          | 0.005968          | 0.569      | 0.988              |
| hsa-miR-550a-3p   | 0.003531          | 0.006028          | 0.573      | 1.195              |
| hsa-miR-449c-5p   | 0.003643          | 0.006211          | 0.552      | 0.990              |
| hsa-miR-125b-2-3p | 0.003712          | 0.006318          | 0.547      | 0.990              |
| hsa-miR-573       | 0.003749          | 0.006372          | 0.541      | 1.009              |
| hsa-miR-3925-5p   | 0.003825          | 0.006491          | 0.574      | 1.015              |
| hsa-miR-1244      | 0.003923          | 0.006650          | 0.527      | 0.983              |
| hsa-miR-551a      | 0.003946          | 0.006679          | 0.551      | 0.991              |
| hsa-miR-196a-5p   | 0.003996          | 0.006753          | 0.572      | 0.950              |
| hsa-miR-4329      | 0.004077          | 0.006880          | 0.563      | 0.981              |
| hsa-miR-31-3p     | 0.004148          | 0.006990          | 0.536      | 1.009              |
| hsa-miR-323b-3p   | 0.004286          | 0.007212          | 0.549      | 0.993              |
| hsa-miR-1469      | 0.004316          | 0.007252          | 0.546      | 1.057              |
| hsa-miR-92a-3p    | 0.004468          | 0.007497          | 0.632      | 1.133              |
| hsa-miR-1269a     | 0.004679          | 0.007840          | 0.546      | 0.993              |
| hsa-miR-182-3p    | 0.004778          | 0.007994          | 0.562      | 0.991              |
| hsa-miR-3713      | 0.004885          | 0.008162          | 0.606      | 1.040              |
| hsa-miR-4269      | 0.004938          | 0.008240          | 0.550      | 0.947              |
| hsa-miR-3915      | 0.004947          | 0.008243          | 0.553      | 1.010              |
| hsa-miR-1321      | 0.004980          | 0.008285          | 0.592      | 1.013              |
| hsa-miR-942-5p    | 0.005087          | 0.008452          | 0.565      | 1.317              |
| hsa-miR-454-5p    | 0.005097          | 0.008457          | 0.553      | 0.927              |
| hsa-miR-548q      | 0.005308          | 0.008795          | 0.519      | 1.046              |
| hsa-miR-548v      | 0.005320          | 0.008802          | 0.539      | 0.906              |
| hsa-miR-891b      | 0.005346          | 0.008833          | 0.541      | 1.010              |
| hsa-miR-2909      | 0.005716          | 0.009431          | 0.541      | 1.011              |
| hsa-miR-518d-3p   | 0.005731          | 0.009442          | 0.550      | 0.982              |
| hsa-miR-302d-5p   | 0.005803          | 0.009547          | 0.545      | 0.993              |
| hsa-miR-650       | 0.006005          | 0.009866          | 0.522      | 1.056              |
| hsa-miR-16-2-3p   | 0.006058          | 0.009941          | 0.559      | 0.976              |
| hsa-miR-570-3p    | 0.006129          | 0.010043          | 0.550      | 0.988              |
| hsa-miR-34c-3p    | 0.006329          | 0.010355          | 0.537      | 0.990              |
| hsa-miR-98-5p     | 0.006427          | 0.010502          | 0.550      | 1.017              |
| hsa-miR-558       | 0.006475          | 0.010565          | 0.548      | 1.008              |
| hsa-miR-3194-5p   | 0.006508          | 0.010604          | 0.581      | 2.976              |
| hsa-miR-3187-3p   | 0.006733          | 0.010956          | 0.547      | 1.010              |
| hsa-miR-548b-5p   | 0.007051          | 0.011457          | 0.529      | 0.976              |
| hsa-miR-99a-5p    | 0.007682          | 0.012467          | 0.547      | 1.219              |
| hsa-miR-4300      | 0.007870          | 0.012754          | 0.539      | 0.992              |
| hsa-miR-340-3p    | 0.007897          | 0.012780          | 0.539      | 0.895              |
| hsa-miR-2278      | 0.008088          | 0.013072          | 0.622      | 1.013              |
| hsa-miR-3133      | 0.008258          | 0.013327          | 0.571      | 0.993              |
| hsa-miR-1246      | 0.008305          | 0.013386          | 0.543      | 1.185              |

| <b>miRNA</b>     | <b>ttest_rawp</b> | <b>ttest_adjp</b> | <b>AUC</b> | <b>fold_change</b> |
|------------------|-------------------|-------------------|------------|--------------------|
| hsa-miR-29b-1-5p | 0.008354          | 0.013445          | 0.579      | 0.986              |
| hsa-miR-1913     | 0.008631          | 0.013872          | 0.594      | 0.987              |
| hsa-miR-520a-5p  | 0.008668          | 0.013914          | 0.541      | 1.009              |
| hsa-miR-3185     | 0.008978          | 0.014392          | 0.560      | 0.993              |
| hsa-miR-544b     | 0.009116          | 0.014593          | 0.539      | 1.008              |
| hsa-miR-203a-3p  | 0.009251          | 0.014789          | 0.563      | 1.024              |
| hsa-miR-2277-5p  | 0.009597          | 0.015322          | 0.537      | 1.008              |
| hsa-miR-873-5p   | 0.009820          | 0.015656          | 0.551      | 0.991              |
| hsa-miR-3612     | 0.009877          | 0.015726          | 0.536      | 1.008              |
| hsa-miR-296-3p   | 0.009999          | 0.015899          | 0.545      | 0.993              |
| hsa-miR-675-5p   | 0.010624          | 0.016870          | 0.550      | 0.994              |
| hsa-miR-3942-5p  | 0.010996          | 0.017437          | 0.545      | 1.009              |
| hsa-miR-3159     | 0.011028          | 0.017464          | 0.529      | 0.992              |
| hsa-miR-604      | 0.011180          | 0.017682          | 0.516      | 1.010              |
| hsa-miR-326      | 0.011205          | 0.017698          | 0.540      | 1.203              |
| hsa-miR-3622b-3p | 0.011347          | 0.017898          | 0.588      | 0.989              |
| hsa-miR-3683     | 0.011362          | 0.017898          | 0.544      | 1.007              |
| hsa-miR-3691-5p  | 0.011857          | 0.018652          | 0.548      | 0.993              |
| hsa-miR-1197     | 0.011880          | 0.018664          | 0.568      | 0.992              |
| hsa-miR-3197     | 0.012520          | 0.019643          | 0.552      | 1.011              |
| hsa-miR-4325     | 0.012593          | 0.019732          | 0.546      | 0.993              |
| hsa-miR-2116-3p  | 0.012739          | 0.019934          | 0.516      | 1.148              |
| hsa-miR-496      | 0.013127          | 0.020514          | 0.551      | 0.992              |
| hsa-miR-3180     | 0.013244          | 0.020670          | 0.544      | 0.993              |
| hsa-miR-372-3p   | 0.013279          | 0.020696          | 0.547      | 0.994              |
| hsa-miR-663b     | 0.013306          | 0.020711          | 0.556      | 0.993              |
| hsa-miR-1294     | 0.013381          | 0.020801          | 0.559      | 0.970              |
| hsa-miR-920      | 0.013507          | 0.020970          | 0.554      | 1.007              |
| hsa-miR-27b-5p   | 0.013980          | 0.021676          | 0.532      | 1.007              |
| hsa-miR-3940-3p  | 0.014028          | 0.021721          | 0.544      | 1.038              |
| hsa-miR-3689a-5p | 0.014240          | 0.022021          | 0.538      | 0.993              |
| hsa-miR-335-5p   | 0.014267          | 0.022034          | 0.541      | 0.937              |
| hsa-miR-613      | 0.014491          | 0.022350          | 0.550      | 0.904              |
| hsa-miR-3171     | 0.014839          | 0.022858          | 0.503      | 0.976              |
| hsa-miR-4267     | 0.015005          | 0.023083          | 0.547      | 0.994              |
| hsa-miR-3150a-3p | 0.015313          | 0.023527          | 0.540      | 0.994              |
| hsa-miR-4307     | 0.015718          | 0.024118          | 0.530      | 0.974              |
| hsa-miR-4319     | 0.016485          | 0.025261          | 0.524      | 1.012              |
| hsa-miR-378a-5p  | 0.016518          | 0.025279          | 0.554      | 1.253              |
| hsa-miR-520d-3p  | 0.016711          | 0.025541          | 0.589      | 0.849              |
| hsa-miR-3184-5p  | 0.016929          | 0.025841          | 0.532      | 1.007              |
| hsa-miR-4276     | 0.017422          | 0.026560          | 0.540      | 1.006              |
| hsa-miR-885-5p   | 0.018061          | 0.027498          | 0.512      | 0.394              |
| hsa-miR-140-3p   | 0.018196          | 0.027668          | 0.604      | 1.146              |
| hsa-miR-383-5p   | 0.018596          | 0.028240          | 0.569      | 1.006              |
| hsa-miR-1912     | 0.018622          | 0.028243          | 0.544      | 1.006              |

| <b>miRNA</b>     | <b>ttest_rawp</b> | <b>ttest_adjp</b> | <b>AUC</b> | <b>fold_change</b> |
|------------------|-------------------|-------------------|------------|--------------------|
| hsa-miR-3191-3p  | 0.018846          | 0.028546          | 0.542      | 1.006              |
| hsa-miR-130a-5p  | 0.019719          | 0.029831          | 0.549      | 0.877              |
| hsa-miR-411-5p   | 0.020373          | 0.030759          | 0.538      | 1.008              |
| hsa-miR-380-3p   | 0.020385          | 0.030759          | 0.555      | 1.014              |
| hsa-miR-618      | 0.020532          | 0.030942          | 0.537      | 1.009              |
| hsa-miR-3936     | 0.020597          | 0.031001          | 0.535      | 1.007              |
| hsa-miR-1179     | 0.020875          | 0.031360          | 0.534      | 0.989              |
| hsa-miR-299-5p   | 0.020907          | 0.031360          | 0.530      | 0.815              |
| hsa-miR-517-5p   | 0.020916          | 0.031360          | 0.542      | 0.994              |
| hsa-miR-4302     | 0.021779          | 0.032613          | 0.528      | 1.007              |
| hsa-miR-149-5p   | 0.022597          | 0.033795          | 0.547      | 1.180              |
| hsa-miR-25-3p    | 0.022744          | 0.033973          | 0.651      | 1.154              |
| hsa-miR-135b-5p  | 0.022795          | 0.034005          | 0.529      | 1.027              |
| hsa-miR-3150b-3p | 0.023182          | 0.034539          | 0.553      | 1.007              |
| hsa-miR-122-5p   | 0.023225          | 0.034560          | 0.518      | 1.165              |
| hsa-miR-3692-5p  | 0.024480          | 0.036382          | 0.588      | 1.012              |
| hsa-miR-33a-5p   | 0.024733          | 0.036712          | 0.539      | 1.008              |
| hsa-miR-518e-5p  | 0.024977          | 0.037027          | 0.555      | 0.994              |
| hsa-miR-302f     | 0.025132          | 0.037199          | 0.519      | 1.010              |
| hsa-miR-521      | 0.025156          | 0.037199          | 0.581      | 0.962              |
| hsa-miR-548n     | 0.025374          | 0.037475          | 0.609      | 1.010              |
| hsa-miR-4273     | 0.026698          | 0.039382          | 0.535      | 0.994              |
| hsa-miR-548a-5p  | 0.026770          | 0.039438          | 0.550      | 1.011              |
| hsa-miR-567      | 0.026811          | 0.039450          | 0.523      | 1.007              |
| hsa-miR-1287-5p  | 0.027097          | 0.039821          | 0.598      | 1.067              |
| hsa-miR-217      | 0.027147          | 0.039845          | 0.535      | 1.006              |
| hsa-miR-424-3p   | 0.027269          | 0.039974          | 0.585      | 0.992              |
| hsa-miR-136-3p   | 0.027422          | 0.040148          | 0.528      | 1.010              |
| hsa-miR-616-5p   | 0.027552          | 0.040290          | 0.513      | 1.009              |
| hsa-let-7f-2-3p  | 0.028066          | 0.040940          | 0.539      | 1.018              |
| hsa-miR-3912-3p  | 0.028066          | 0.040940          | 0.532      | 1.008              |
| hsa-miR-548c-3p  | 0.028143          | 0.041002          | 0.593      | 1.008              |
| hsa-miR-636      | 0.028381          | 0.041297          | 0.515      | 1.030              |
| hsa-miR-1468-5p  | 0.029186          | 0.042371          | 0.539      | 0.994              |
| hsa-miR-92b-5p   | 0.029191          | 0.042371          | 0.509      | 1.008              |
| hsa-miR-4330     | 0.030327          | 0.043967          | 0.526      | 1.007              |
| hsa-miR-4280     | 0.030622          | 0.044340          | 0.531      | 1.008              |
| hsa-miR-3677-3p  | 0.030822          | 0.044574          | 0.560      | 0.993              |
| hsa-miR-1258     | 0.031047          | 0.044845          | 0.536      | 0.993              |
| hsa-miR-4263     | 0.031260          | 0.045099          | 0.536      | 0.994              |
| hsa-miR-26a-2-3p | 0.031496          | 0.045383          | 0.555      | 1.013              |
| hsa-miR-3129-5p  | 0.031729          | 0.045664          | 0.537      | 0.991              |
| hsa-miR-1266-5p  | 0.032022          | 0.046029          | 0.527      | 1.006              |
| hsa-miR-1182     | 0.033672          | 0.048343          | 0.611      | 1.109              |
| hsa-miR-200a-5p  | 0.035692          | 0.051180          | 0.536      | 1.008              |
| hsa-miR-671-3p   | 0.036005          | 0.051566          | 0.541      | 0.983              |

| miRNA            | ttest_rawp | ttest_adjp | AUC   | fold_change |
|------------------|------------|------------|-------|-------------|
| hsa-miR-1273a    | 0.036107   | 0.051651   | 0.529 | 1.008       |
| hsa-miR-3922-3p  | 0.036597   | 0.052288   | 0.552 | 0.980       |
| hsa-miR-198      | 0.037668   | 0.053754   | 0.574 | 1.400       |
| hsa-miR-520a-3p  | 0.037906   | 0.054027   | 0.544 | 0.985       |
| hsa-miR-96-3p    | 0.038755   | 0.055171   | 0.532 | 1.006       |
| hsa-miR-4255     | 0.039296   | 0.055874   | 0.535 | 1.006       |
| hsa-miR-377-5p   | 0.040233   | 0.057138   | 0.552 | 0.993       |
| hsa-miR-132-3p   | 0.041955   | 0.059512   | 0.567 | 1.093       |
| hsa-miR-7-2-3p   | 0.042206   | 0.059797   | 0.545 | 0.983       |
| hsa-miR-224-3p   | 0.043095   | 0.060982   | 0.534 | 0.993       |
| hsa-miR-602      | 0.043252   | 0.061132   | 0.556 | 1.118       |
| hsa-miR-19a-5p   | 0.043822   | 0.061864   | 0.519 | 1.007       |
| hsa-miR-3169     | 0.043919   | 0.061927   | 0.532 | 1.006       |
| hsa-miR-9-3p     | 0.044746   | 0.063018   | 0.502 | 0.984       |
| hsa-miR-4295     | 0.045233   | 0.063628   | 0.529 | 1.008       |
| hsa-let-7a-5p    | 0.045973   | 0.064591   | 0.529 | 0.979       |
| hsa-miR-562      | 0.046443   | 0.065174   | 0.525 | 1.007       |
| hsa-miR-3142     | 0.046854   | 0.065673   | 0.527 | 1.006       |
| hsa-miR-3678-5p  | 0.047292   | 0.066208   | 0.524 | 1.006       |
| hsa-miR-34a-5p   | 0.047450   | 0.066352   | 0.501 | 1.224       |
| hsa-miR-600      | 0.047963   | 0.066990   | 0.542 | 0.995       |
| hsa-miR-1256     | 0.049372   | 0.068877   | 0.540 | 0.992       |
| hsa-miR-1279     | 0.051250   | 0.071412   | 0.531 | 1.010       |
| hsa-miR-676-3p   | 0.052694   | 0.073338   | 0.528 | 1.006       |
| hsa-miR-938      | 0.052821   | 0.073428   | 0.574 | 1.007       |
| hsa-miR-200b-5p  | 0.053631   | 0.074466   | 0.529 | 0.993       |
| hsa-miR-711      | 0.054306   | 0.075315   | 0.577 | 1.328       |
| hsa-miR-516b-5p  | 0.055159   | 0.076408   | 0.534 | 1.007       |
| hsa-miR-30e-3p   | 0.055530   | 0.076832   | 0.520 | 0.980       |
| hsa-miR-553      | 0.055648   | 0.076906   | 0.543 | 0.992       |
| hsa-miR-145-3p   | 0.056756   | 0.078345   | 0.522 | 1.013       |
| hsa-miR-649      | 0.057608   | 0.079429   | 0.526 | 1.007       |
| hsa-miR-34a-3p   | 0.058587   | 0.080685   | 0.514 | 1.007       |
| hsa-miR-221-3p   | 0.060163   | 0.082759   | 0.523 | 1.015       |
| hsa-miR-542-5p   | 0.060387   | 0.082971   | 0.530 | 0.963       |
| hsa-miR-519c-3p  | 0.061122   | 0.083883   | 0.535 | 1.009       |
| hsa-miR-3911     | 0.061838   | 0.084741   | 0.534 | 3.773       |
| hsa-miR-3622a-5p | 0.061890   | 0.084741   | 0.563 | 1.008       |
| hsa-miR-4279     | 0.063672   | 0.087080   | 0.576 | 0.993       |
| hsa-miR-370-3p   | 0.063995   | 0.087421   | 0.506 | 0.929       |
| hsa-miR-630      | 0.064342   | 0.087793   | 0.615 | 1.826       |
| hsa-miR-421      | 0.064480   | 0.087880   | 0.526 | 0.992       |
| hsa-miR-3648     | 0.064624   | 0.087975   | 0.537 | 6.196       |
| hsa-miR-579-3p   | 0.066129   | 0.089920   | 0.525 | 0.994       |
| hsa-miR-3177-3p  | 0.069773   | 0.094680   | 0.517 | 1.009       |
| hsa-miR-640      | 0.069789   | 0.094680   | 0.555 | 0.957       |

| <b>miRNA</b>     | <b>ttest_rawp</b> | <b>ttest_adjp</b> | <b>AUC</b> | <b>fold_change</b> |
|------------------|-------------------|-------------------|------------|--------------------|
| hsa-miR-1915-5p  | 0.070232          | 0.095171          | 0.511      | 1.156              |
| hsa-miR-3680-3p  | 0.070928          | 0.096004          | 0.537      | 1.010              |
| hsa-miR-3158-3p  | 0.071834          | 0.097119          | 0.540      | 0.994              |
| hsa-miR-1185-5p  | 0.073688          | 0.099513          | 0.537      | 0.993              |
| hsa-miR-185-5p   | 0.074030          | 0.099861          | 0.597      | 1.169              |
| hsa-miR-532-5p   | 0.074610          | 0.100527          | 0.524      | 1.027              |
| hsa-miR-1267     | 0.075134          | 0.101044          | 0.527      | 1.057              |
| hsa-miR-875-3p   | 0.075164          | 0.101044          | 0.533      | 1.006              |
| hsa-miR-513b-5p  | 0.076688          | 0.102976          | 0.526      | 0.942              |
| hsa-let-7c-5p    | 0.077465          | 0.103902          | 0.519      | 1.207              |
| hsa-miR-302b-5p  | 0.077920          | 0.104393          | 0.517      | 1.007              |
| hsa-miR-510-5p   | 0.078506          | 0.105060          | 0.519      | 0.995              |
| hsa-miR-1228-5p  | 0.078765          | 0.105287          | 0.528      | 1.030              |
| hsa-miR-3921     | 0.078892          | 0.105337          | 0.544      | 1.005              |
| hsa-let-7f-5p    | 0.079878          | 0.106534          | 0.533      | 1.048              |
| hsa-miR-3682-3p  | 0.080119          | 0.106736          | 0.520      | 1.069              |
| hsa-miR-1306-3p  | 0.080285          | 0.106835          | 0.579      | 0.993              |
| hsa-miR-3613-5p  | 0.080511          | 0.107016          | 0.504      | 1.026              |
| hsa-miR-22-5p    | 0.080772          | 0.107242          | 0.510      | 0.989              |
| hsa-miR-563      | 0.081116          | 0.107579          | 0.547      | 1.095              |
| hsa-miR-4306     | 0.081966          | 0.108584          | 0.572      | 1.180              |
| hsa-miR-425-5p   | 0.083049          | 0.109617          | 0.581      | 1.173              |
| hsa-miR-612      | 0.083142          | 0.109617          | 0.530      | 0.994              |
| hsa-miR-519d-3p  | 0.083145          | 0.109617          | 0.584      | 0.990              |
| hsa-miR-3909     | 0.083180          | 0.109617          | 0.546      | 0.996              |
| hsa-miR-492      | 0.083209          | 0.109617          | 0.532      | 0.995              |
| hsa-miR-3649     | 0.084259          | 0.110877          | 0.542      | 0.996              |
| hsa-miR-3192-5p  | 0.085185          | 0.111971          | 0.518      | 0.993              |
| hsa-miR-1207-3p  | 0.088507          | 0.116208          | 0.522      | 0.992              |
| hsa-miR-30c-2-3p | 0.089534          | 0.117427          | 0.506      | 1.018              |
| hsa-miR-4301     | 0.090146          | 0.118098          | 0.513      | 1.007              |
| hsa-miR-130b-5p  | 0.090835          | 0.118742          | 0.516      | 1.031              |
| hsa-let-7b-5p    | 0.090838          | 0.118742          | 0.522      | 1.114              |
| hsa-miR-939-5p   | 0.091721          | 0.119764          | 0.515      | 0.852              |
| hsa-miR-548j-5p  | 0.093958          | 0.122549          | 0.526      | 1.009              |
| hsa-miR-4275     | 0.094751          | 0.123448          | 0.542      | 0.993              |
| hsa-miR-382-5p   | 0.096169          | 0.125157          | 0.543      | 0.988              |
| hsa-miR-214-5p   | 0.096662          | 0.125631          | 0.530      | 0.995              |
| hsa-miR-548i     | 0.096745          | 0.125631          | 0.527      | 0.993              |
| hsa-miR-18a-3p   | 0.097369          | 0.126302          | 0.506      | 1.073              |
| hsa-miR-1296-5p  | 0.098376          | 0.127309          | 0.607      | 0.907              |
| hsa-miR-3122     | 0.098394          | 0.127309          | 0.518      | 0.995              |
| hsa-miR-329-3p   | 0.098468          | 0.127309          | 0.507      | 1.060              |
| hsa-miR-1236-3p  | 0.098741          | 0.127522          | 0.545      | 0.992              |
| hsa-miR-507      | 0.101884          | 0.131438          | 0.524      | 1.005              |
| hsa-miR-3174     | 0.102251          | 0.131768          | 0.541      | 1.007              |

| <b>miRNA</b>     | <b>ttest_rawp</b> | <b>ttest_adjp</b> | <b>AUC</b> | <b>fold_change</b> |
|------------------|-------------------|-------------------|------------|--------------------|
| hsa-miR-488-3p   | 0.102777          | 0.132301          | 0.540      | 0.995              |
| hsa-miR-1303     | 0.105730          | 0.135954          | 0.570      | 0.988              |
| hsa-miR-2117     | 0.105898          | 0.136023          | 0.527      | 0.996              |
| hsa-miR-605-5p   | 0.106400          | 0.136519          | 0.533      | 0.953              |
| hsa-miR-765      | 0.107021          | 0.137168          | 0.573      | 1.198              |
| hsa-miR-335-3p   | 0.107681          | 0.137864          | 0.543      | 0.578              |
| hsa-miR-888-3p   | 0.108816          | 0.139166          | 0.518      | 1.005              |
| hsa-miR-3166     | 0.109927          | 0.140436          | 0.529      | 0.995              |
| hsa-miR-4317     | 0.111043          | 0.141708          | 0.534      | 1.060              |
| hsa-miR-224-5p   | 0.112111          | 0.142918          | 0.513      | 1.058              |
| hsa-miR-648      | 0.115306          | 0.146832          | 0.552      | 1.007              |
| hsa-miR-4264     | 0.117389          | 0.149324          | 0.520      | 1.005              |
| hsa-miR-149-3p   | 0.118322          | 0.150288          | 0.527      | 1.021              |
| hsa-miR-3622a-3p | 0.118401          | 0.150288          | 0.514      | 1.010              |
| hsa-miR-520e     | 0.121595          | 0.154177          | 0.514      | 1.013              |
| hsa-miR-30a-5p   | 0.122959          | 0.155739          | 0.531      | 2.207              |
| hsa-miR-422a     | 0.125598          | 0.158912          | 0.528      | 1.008              |
| hsa-let-7d-5p    | 0.125737          | 0.158917          | 0.532      | 1.184              |
| hsa-miR-488-5p   | 0.126340          | 0.159510          | 0.512      | 1.006              |
| hsa-miR-593-5p   | 0.126676          | 0.159762          | 0.520      | 1.005              |
| hsa-miR-449a     | 0.127424          | 0.160535          | 0.570      | 0.994              |
| hsa-let-7b-3p    | 0.128128          | 0.161251          | 0.549      | 1.040              |
| hsa-miR-1825     | 0.133253          | 0.167522          | 0.526      | 1.144              |
| hsa-miR-718      | 0.133724          | 0.167936          | 0.554      | 2.224              |
| hsa-miR-373-3p   | 0.135481          | 0.169962          | 0.534      | 0.951              |
| hsa-miR-3170     | 0.136518          | 0.171024          | 0.516      | 0.972              |
| hsa-miR-518a-3p  | 0.136617          | 0.171024          | 0.556      | 0.993              |
| hsa-miR-1253     | 0.137159          | 0.171451          | 0.521      | 0.994              |
| hsa-miR-517a-3p  | 0.137248          | 0.171451          | 0.509      | 0.987              |
| hsa-miR-29a-5p   | 0.139146          | 0.173639          | 0.529      | 0.967              |
| hsa-miR-3153     | 0.139374          | 0.173741          | 0.544      | 0.996              |
| hsa-miR-526b-5p  | 0.140711          | 0.175222          | 0.506      | 1.075              |
| hsa-miR-93-3p    | 0.142289          | 0.177000          | 0.538      | 1.046              |
| hsa-miR-222-5p   | 0.144777          | 0.179907          | 0.519      | 1.004              |
| hsa-miR-592      | 0.146716          | 0.182125          | 0.556      | 1.003              |
| hsa-miR-218-1-3p | 0.149286          | 0.185107          | 0.516      | 1.004              |
| hsa-miR-1304-5p  | 0.149431          | 0.185107          | 0.519      | 1.017              |
| hsa-miR-3181     | 0.149810          | 0.185382          | 0.505      | 1.011              |
| hsa-miR-3163     | 0.150217          | 0.185692          | 0.529      | 1.023              |
| hsa-miR-603      | 0.152667          | 0.188523          | 0.523      | 0.994              |
| hsa-miR-511-5p   | 0.155490          | 0.191809          | 0.520      | 1.005              |
| hsa-miR-887-3p   | 0.159342          | 0.196355          | 0.518      | 1.020              |
| hsa-let-7f-1-3p  | 0.159920          | 0.196674          | 0.556      | 1.130              |
| hsa-miR-515-3p   | 0.159933          | 0.196674          | 0.551      | 0.993              |
| hsa-miR-564      | 0.160303          | 0.196924          | 0.529      | 0.933              |
| hsa-miR-518c-5p  | 0.164335          | 0.201668          | 0.547      | 0.998              |



| <b>miRNA</b>     | <b>ttest_rawp</b> | <b>ttest_adjp</b> | <b>AUC</b> | <b>fold_change</b> |
|------------------|-------------------|-------------------|------------|--------------------|
| hsa-miR-4324     | 0.165026          | 0.202307          | 0.538      | 0.964              |
| hsa-miR-302b-3p  | 0.165479          | 0.202651          | 0.509      | 1.011              |
| hsa-miR-376b-3p  | 0.167297          | 0.204667          | 0.535      | 1.006              |
| hsa-miR-557      | 0.169968          | 0.207719          | 0.516      | 2.548              |
| hsa-miR-188-5p   | 0.171349          | 0.209191          | 0.525      | 2.695              |
| hsa-miR-3660     | 0.172592          | 0.210491          | 0.534      | 1.005              |
| hsa-miR-218-2-3p | 0.173536          | 0.211424          | 0.521      | 0.994              |
| hsa-miR-3671     | 0.176342          | 0.214621          | 0.520      | 0.995              |
| hsa-miR-23c      | 0.179089          | 0.217742          | 0.559      | 1.137              |
| hsa-miR-211-5p   | 0.180997          | 0.219835          | 0.527      | 1.008              |
| hsa-miR-33a-3p   | 0.181802          | 0.220587          | 0.524      | 0.993              |
| hsa-miR-875-5p   | 0.183595          | 0.222533          | 0.542      | 0.996              |
| hsa-miR-3688-3p  | 0.184552          | 0.223465          | 0.526      | 1.005              |
| hsa-miR-3605-5p  | 0.185749          | 0.224684          | 0.541      | 1.010              |
| hsa-miR-3935     | 0.188643          | 0.227951          | 0.606      | 0.894              |
| hsa-miR-34b-5p   | 0.189134          | 0.228311          | 0.531      | 1.055              |
| hsa-miR-513a-5p  | 0.191667          | 0.230984          | 0.534      | 0.910              |
| hsa-miR-3145-3p  | 0.191739          | 0.230984          | 0.528      | 1.004              |
| hsa-miR-331-5p   | 0.193188          | 0.232493          | 0.528      | 1.005              |
| hsa-miR-518a-5p  | 0.196591          | 0.236349          | 0.545      | 0.996              |
| hsa-miR-3661     | 0.198047          | 0.237857          | 0.540      | 0.997              |
| hsa-miR-33b-5p   | 0.199111          | 0.238892          | 0.515      | 1.005              |
| hsa-miR-526b-3p  | 0.200178          | 0.239930          | 0.531      | 0.993              |
| hsa-miR-632      | 0.202671          | 0.242671          | 0.526      | 1.004              |
| hsa-miR-520h     | 0.211359          | 0.252819          | 0.532      | 0.993              |
| hsa-miR-1470     | 0.213290          | 0.254871          | 0.558      | 0.984              |
| hsa-miR-135a-5p  | 0.217501          | 0.259641          | 0.514      | 1.014              |
| hsa-miR-520c-3p  | 0.219499          | 0.261523          | 0.571      | 0.994              |
| hsa-miR-3681-5p  | 0.219520          | 0.261523          | 0.511      | 1.004              |
| hsa-miR-29c-5p   | 0.222655          | 0.264991          | 0.504      | 1.164              |
| hsa-miR-885-3p   | 0.228359          | 0.271507          | 0.526      | 1.004              |
| hsa-miR-519e-5p  | 0.231985          | 0.275541          | 0.527      | 1.006              |
| hsa-miR-1181     | 0.232981          | 0.276445          | 0.507      | 2.343              |
| hsa-miR-1243     | 0.236862          | 0.280769          | 0.531      | 0.999              |
| hsa-miR-664a-3p  | 0.242177          | 0.286702          | 0.523      | 1.129              |
| hsa-miR-525-3p   | 0.242352          | 0.286702          | 0.527      | 0.995              |
| hsa-miR-497-3p   | 0.245746          | 0.290427          | 0.525      | 0.997              |
| hsa-miR-891a-5p  | 0.250941          | 0.296270          | 0.515      | 1.004              |
| hsa-miR-3199     | 0.253283          | 0.298738          | 0.530      | 1.004              |
| hsa-miR-124-5p   | 0.254806          | 0.300235          | 0.508      | 1.004              |
| hsa-miR-626      | 0.257458          | 0.303058          | 0.515      | 1.005              |
| hsa-miR-4312     | 0.260155          | 0.305927          | 0.585      | 0.921              |
| hsa-miR-10a-5p   | 0.263872          | 0.309991          | 0.508      | 1.526              |
| hsa-miR-519e-3p  | 0.264245          | 0.310121          | 0.511      | 1.008              |
| hsa-miR-628-3p   | 0.268699          | 0.315035          | 0.532      | 1.036              |
| hsa-miR-32-3p    | 0.272685          | 0.319316          | 0.522      | 1.188              |

| <b>miRNA</b>     | <b>ttest_rawp</b> | <b>ttest_adjp</b> | <b>AUC</b> | <b>fold_change</b> |
|------------------|-------------------|-------------------|------------|--------------------|
| hsa-miR-3913-5p  | 0.272889          | 0.319316          | 0.525      | 0.998              |
| hsa-miR-619-3p   | 0.274353          | 0.320711          | 0.517      | 1.004              |
| hsa-miR-223-5p   | 0.278093          | 0.324762          | 0.515      | 1.038              |
| hsa-miR-670-5p   | 0.280145          | 0.326835          | 0.528      | 0.949              |
| hsa-miR-508-3p   | 0.281728          | 0.328359          | 0.518      | 1.003              |
| hsa-miR-3667-5p  | 0.283910          | 0.330576          | 0.507      | 1.376              |
| hsa-miR-202-5p   | 0.287330          | 0.334141          | 0.516      | 1.007              |
| hsa-miR-141-5p   | 0.287537          | 0.334141          | 0.519      | 1.003              |
| hsa-miR-3146     | 0.288199          | 0.334582          | 0.524      | 1.003              |
| hsa-miR-659-3p   | 0.294348          | 0.341362          | 0.521      | 1.279              |
| hsa-miR-519b-3p  | 0.294616          | 0.341362          | 0.517      | 1.008              |
| hsa-miR-4320     | 0.298553          | 0.345586          | 0.530      | 0.997              |
| hsa-miR-520f-3p  | 0.301050          | 0.348135          | 0.515      | 1.012              |
| hsa-miR-3675-5p  | 0.307390          | 0.355119          | 0.510      | 0.997              |
| hsa-miR-302a-5p  | 0.308752          | 0.356344          | 0.531      | 0.997              |
| hsa-miR-676-5p   | 0.310802          | 0.358361          | 0.523      | 0.998              |
| hsa-miR-631      | 0.311908          | 0.359287          | 0.598      | 1.069              |
| hsa-miR-657      | 0.312878          | 0.360053          | 0.515      | 1.005              |
| hsa-miR-25-5p    | 0.316393          | 0.363745          | 0.509      | 1.005              |
| hsa-miR-1324     | 0.317273          | 0.364402          | 0.512      | 1.004              |
| hsa-miR-744-3p   | 0.318539          | 0.365501          | 0.521      | 0.965              |
| hsa-miR-1323     | 0.324834          | 0.372363          | 0.524      | 1.006              |
| hsa-miR-4259     | 0.328907          | 0.376667          | 0.504      | 1.077              |
| hsa-miR-662      | 0.334800          | 0.383044          | 0.539      | 1.004              |
| hsa-miR-3689b-3p | 0.335679          | 0.383680          | 0.507      | 0.969              |
| hsa-miR-767-5p   | 0.337167          | 0.385008          | 0.513      | 1.003              |
| hsa-miR-210-3p   | 0.338233          | 0.385853          | 0.509      | 1.043              |
| hsa-miR-4309     | 0.338836          | 0.386049          | 0.521      | 0.998              |
| hsa-miR-186-3p   | 0.339057          | 0.386049          | 0.523      | 0.996              |
| hsa-miR-1204     | 0.345574          | 0.393090          | 0.518      | 0.997              |
| hsa-let-7e-5p    | 0.352326          | 0.400386          | 0.506      | 1.416              |
| hsa-miR-3674     | 0.355278          | 0.403353          | 0.516      | 0.998              |
| hsa-miR-1208     | 0.356080          | 0.403876          | 0.519      | 1.004              |
| hsa-miR-2277-3p  | 0.359649          | 0.407533          | 0.567      | 1.031              |
| hsa-miR-578      | 0.364496          | 0.412631          | 0.514      | 1.003              |
| hsa-miR-302c-3p  | 0.376158          | 0.425413          | 0.522      | 0.995              |
| hsa-miR-555      | 0.376507          | 0.425413          | 0.509      | 1.003              |
| hsa-miR-548f-3p  | 0.377880          | 0.426332          | 0.640      | 0.942              |
| hsa-miR-3136-5p  | 0.378041          | 0.426332          | 0.533      | 0.998              |
| hsa-miR-3654     | 0.378530          | 0.426477          | 0.582      | 0.999              |
| hsa-miR-3670     | 0.380899          | 0.428738          | 0.528      | 0.997              |
| hsa-miR-485-3p   | 0.383620          | 0.431390          | 0.507      | 1.132              |
| hsa-miR-651-5p   | 0.384426          | 0.431886          | 0.516      | 0.997              |
| hsa-miR-1292-5p  | 0.388243          | 0.435760          | 0.510      | 1.004              |
| hsa-miR-1200     | 0.391308          | 0.438538          | 0.512      | 0.997              |
| hsa-miR-432-5p   | 0.391460          | 0.438538          | 0.516      | 0.985              |

| <b>miRNA</b>     | <b>ttest_rawp</b> | <b>ttest_adjp</b> | <b>AUC</b> | <b>fold_change</b> |
|------------------|-------------------|-------------------|------------|--------------------|
| hsa-miR-520g-3p  | 0.394034          | 0.441005          | 0.528      | 1.004              |
| hsa-miR-523-3p   | 0.394729          | 0.441365          | 0.517      | 0.998              |
| hsa-miR-621      | 0.397159          | 0.443663          | 0.519      | 0.998              |
| hsa-miR-3680-5p  | 0.400503          | 0.446977          | 0.515      | 0.998              |
| hsa-miR-3139     | 0.401199          | 0.447332          | 0.517      | 0.998              |
| hsa-miR-4296     | 0.404025          | 0.450058          | 0.560      | 0.999              |
| hsa-miR-520b     | 0.404715          | 0.450402          | 0.573      | 1.002              |
| hsa-miR-1247-5p  | 0.405642          | 0.451010          | 0.554      | 1.000              |
| hsa-miR-3143     | 0.412712          | 0.458440          | 0.507      | 1.003              |
| hsa-miR-4261     | 0.420371          | 0.466509          | 0.541      | 0.891              |
| hsa-miR-3131     | 0.424187          | 0.470303          | 0.557      | 1.322              |
| hsa-miR-371a-3p  | 0.433224          | 0.479873          | 0.503      | 1.016              |
| hsa-miR-500b-5p  | 0.439838          | 0.486743          | 0.506      | 1.063              |
| hsa-miR-2114-3p  | 0.441573          | 0.488207          | 0.516      | 0.998              |
| hsa-miR-4328     | 0.443627          | 0.490019          | 0.505      | 1.003              |
| hsa-miR-548u     | 0.450970          | 0.497666          | 0.524      | 1.003              |
| hsa-miR-588      | 0.452505          | 0.498894          | 0.523      | 0.998              |
| hsa-miR-4321     | 0.455658          | 0.501903          | 0.501      | 0.997              |
| hsa-miR-513c-5p  | 0.456786          | 0.502677          | 0.508      | 0.983              |
| hsa-miR-106a-3p  | 0.463727          | 0.509841          | 0.501      | 1.004              |
| hsa-miR-3622b-5p | 0.465325          | 0.511123          | 0.518      | 0.996              |
| hsa-miR-4288     | 0.467376          | 0.512900          | 0.522      | 0.998              |
| hsa-miR-4265     | 0.468825          | 0.514013          | 0.536      | 0.998              |
| hsa-miR-525-5p   | 0.473744          | 0.518925          | 0.506      | 1.005              |
| hsa-miR-548y     | 0.476701          | 0.521681          | 0.515      | 0.969              |
| hsa-miR-10b-3p   | 0.490323          | 0.536092          | 0.566      | 0.999              |
| hsa-miR-95-3p    | 0.500253          | 0.546444          | 0.553      | 1.024              |
| hsa-miR-429      | 0.506930          | 0.553227          | 0.537      | 1.056              |
| hsa-miR-1178-3p  | 0.520511          | 0.567525          | 0.512      | 1.004              |
| hsa-miR-202-3p   | 0.524664          | 0.571527          | 0.500      | 0.908              |
| hsa-miR-582-3p   | 0.532690          | 0.579736          | 0.507      | 0.994              |
| hsa-miR-4277     | 0.533399          | 0.579974          | 0.509      | 0.998              |
| hsa-miR-331-3p   | 0.534987          | 0.581166          | 0.535      | 1.060              |
| hsa-miR-483-3p   | 0.538511          | 0.584457          | 0.512      | 1.020              |
| hsa-miR-16-1-3p  | 0.545262          | 0.590808          | 0.503      | 0.993              |
| hsa-miR-4294     | 0.545361          | 0.590808          | 0.519      | 0.998              |
| hsa-miR-455-3p   | 0.554517          | 0.600177          | 0.549      | 1.020              |
| hsa-miR-3938     | 0.556095          | 0.601335          | 0.590      | 1.565              |
| hsa-miR-3165     | 0.557685          | 0.602504          | 0.508      | 0.998              |
| hsa-miR-15b-3p   | 0.561716          | 0.606305          | 0.508      | 0.979              |
| hsa-miR-100-5p   | 0.577408          | 0.622674          | 0.520      | 1.255              |
| hsa-miR-3132     | 0.578436          | 0.623215          | 0.521      | 0.991              |
| hsa-miR-554      | 0.580204          | 0.624277          | 0.503      | 1.003              |
| hsa-miR-518c-3p  | 0.580478          | 0.624277          | 0.502      | 1.004              |
| hsa-miR-509-3p   | 0.582309          | 0.625678          | 0.502      | 0.998              |
| hsa-miR-769-3p   | 0.583134          | 0.625996          | 0.579      | 1.008              |

| <b>miRNA</b>    | <b>ttest_rawp</b> | <b>ttest_adjp</b> | <b>AUC</b> | <b>fold_change</b> |
|-----------------|-------------------|-------------------|------------|--------------------|
| hsa-miR-512-5p  | 0.587762          | 0.630392          | 0.501      | 1.002              |
| hsa-miR-4260    | 0.596807          | 0.639513          | 0.516      | 0.998              |
| hsa-miR-200b-3p | 0.597752          | 0.639946          | 0.595      | 1.878              |
| hsa-miR-1229-3p | 0.599032          | 0.640737          | 0.521      | 1.026              |
| hsa-miR-1264    | 0.611530          | 0.653514          | 0.514      | 0.991              |
| hsa-miR-589-5p  | 0.614374          | 0.655961          | 0.523      | 0.999              |
| hsa-miR-761     | 0.615518          | 0.656590          | 0.506      | 0.999              |
| hsa-miR-3616-3p | 0.627682          | 0.668962          | 0.530      | 0.964              |
| hsa-miR-595     | 0.634151          | 0.675248          | 0.586      | 0.850              |
| hsa-miR-147a    | 0.640908          | 0.681829          | 0.501      | 1.002              |
| hsa-miR-195-3p  | 0.646460          | 0.686972          | 0.588      | 1.012              |
| hsa-miR-2114-5p | 0.646903          | 0.686972          | 0.507      | 1.001              |
| hsa-miR-3167    | 0.648444          | 0.687991          | 0.500      | 1.002              |
| hsa-miR-3666    | 0.655438          | 0.694787          | 0.511      | 0.997              |
| hsa-miR-548x-3p | 0.662021          | 0.701138          | 0.533      | 0.993              |
| hsa-miR-1909-5p | 0.667598          | 0.706411          | 0.608      | 0.980              |
| hsa-miR-2355-3p | 0.674551          | 0.713132          | 0.502      | 1.001              |
| hsa-miR-1257    | 0.681234          | 0.719553          | 0.506      | 0.998              |
| hsa-miR-517c-3p | 0.690334          | 0.728515          | 0.540      | 1.000              |
| hsa-miR-4316    | 0.691390          | 0.728979          | 0.504      | 0.999              |
| hsa-miR-645     | 0.699199          | 0.736556          | 0.504      | 0.999              |
| hsa-miR-1205    | 0.702792          | 0.739682          | 0.517      | 0.999              |
| hsa-miR-302a-3p | 0.704262          | 0.740571          | 0.532      | 1.000              |
| hsa-miR-24-3p   | 0.708420          | 0.744282          | 0.530      | 1.048              |
| hsa-miR-124-3p  | 0.714898          | 0.750421          | 0.503      | 0.998              |
| hsa-miR-1203    | 0.718627          | 0.753303          | 0.537      | 1.000              |
| hsa-miR-199a-5p | 0.718917          | 0.753303          | 0.510      | 1.142              |
| hsa-miR-26b-3p  | 0.726949          | 0.761045          | 0.504      | 1.004              |
| hsa-miR-635     | 0.737928          | 0.771855          | 0.507      | 0.998              |
| hsa-miR-194-3p  | 0.741526          | 0.774934          | 0.501      | 1.002              |
| hsa-miR-486-5p  | 0.747150          | 0.780122          | 0.561      | 1.065              |
| hsa-miR-194-5p  | 0.748132          | 0.780459          | 0.502      | 1.089              |
| hsa-miR-489-3p  | 0.749049          | 0.780726          | 0.502      | 0.998              |
| hsa-miR-206     | 0.749866          | 0.780891          | 0.509      | 1.005              |
| hsa-miR-522-3p  | 0.756760          | 0.787377          | 0.509      | 1.001              |
| hsa-miR-205-3p  | 0.768384          | 0.798768          | 0.515      | 0.999              |
| hsa-miR-182-5p  | 0.770699          | 0.800471          | 0.520      | 1.065              |
| hsa-miR-30a-3p  | 0.774470          | 0.803682          | 0.574      | 1.657              |
| hsa-miR-28-5p   | 0.775289          | 0.803828          | 0.518      | 1.026              |
| hsa-miR-9-5p    | 0.778593          | 0.806546          | 0.503      | 0.999              |
| hsa-miR-506-3p  | 0.787795          | 0.815364          | 0.505      | 1.001              |
| hsa-miR-3646    | 0.789731          | 0.816654          | 0.581      | 1.069              |
| hsa-miR-337-3p  | 0.792933          | 0.819072          | 0.520      | 0.799              |
| hsa-miR-218-5p  | 0.793454          | 0.819072          | 0.524      | 0.952              |
| hsa-miR-3178    | 0.794901          | 0.819850          | 0.513      | 1.003              |
| hsa-miR-216a-5p | 0.796195          | 0.820469          | 0.508      | 1.000              |

| <b>miRNA</b>    | <b>ttest_rawp</b> | <b>ttest_adjp</b> | <b>AUC</b> | <b>fold_change</b> |
|-----------------|-------------------|-------------------|------------|--------------------|
| hsa-miR-548aa   | 0.797888          | 0.821498          | 0.569      | 0.995              |
| hsa-miR-431-3p  | 0.803710          | 0.826321          | 0.508      | 1.000              |
| hsa-miR-200a-3p | 0.803969          | 0.826321          | 0.615      | 1.231              |
| hsa-miR-106b-3p | 0.806113          | 0.827805          | 0.517      | 1.000              |
| hsa-miR-3939    | 0.808736          | 0.829778          | 0.502      | 0.998              |
| hsa-miR-3714    | 0.811143          | 0.831527          | 0.544      | 1.001              |
| hsa-miR-1254    | 0.826212          | 0.846241          | 0.588      | 0.982              |
| hsa-miR-596     | 0.840244          | 0.859869          | 0.506      | 1.000              |
| hsa-miR-339-3p  | 0.855964          | 0.875200          | 0.503      | 1.048              |
| hsa-miR-876-5p  | 0.858152          | 0.876507          | 0.507      | 0.998              |
| hsa-miR-3664-5p | 0.858725          | 0.876507          | 0.505      | 1.000              |
| hsa-miR-924     | 0.860858          | 0.877927          | 0.502      | 0.905              |
| hsa-miR-611     | 0.863282          | 0.879640          | 0.511      | 1.000              |
| hsa-miR-4304    | 0.866733          | 0.882397          | 0.567      | 1.042              |
| hsa-miR-409-5p  | 0.875534          | 0.890590          | 0.513      | 1.002              |
| hsa-miR-379-3p  | 0.879125          | 0.893475          | 0.505      | 1.000              |
| hsa-miR-1293    | 0.883684          | 0.897338          | 0.515      | 1.000              |
| hsa-miR-30d-5p  | 0.886288          | 0.898443          | 0.509      | 1.119              |
| hsa-miR-449b-5p | 0.886350          | 0.898443          | 0.517      | 1.000              |
| hsa-miR-552-3p  | 0.887121          | 0.898443          | 0.509      | 0.999              |
| hsa-miR-148a-5p | 0.887811          | 0.898443          | 0.515      | 1.001              |
| hsa-miR-4262    | 0.894165          | 0.904101          | 0.507      | 1.000              |
| hsa-miR-4268    | 0.898125          | 0.907329          | 0.505      | 1.000              |
| hsa-miR-1251-5p | 0.900316          | 0.908766          | 0.512      | 1.000              |
| hsa-miR-1291    | 0.903538          | 0.911241          | 0.515      | 1.000              |
| hsa-miR-889-3p  | 0.908208          | 0.915171          | 0.501      | 1.001              |
| hsa-miR-3687    | 0.926917          | 0.933228          | 0.510      | 0.999              |
| hsa-miR-1538    | 0.947842          | 0.953484          | 0.563      | 1.004              |
| hsa-miR-624-3p  | 0.949757          | 0.954599          | 0.505      | 1.000              |
| hsa-miR-580-3p  | 0.950584          | 0.954618          | 0.513      | 1.000              |
| hsa-miR-433-3p  | 0.951459          | 0.954687          | 0.528      | 1.004              |
| hsa-miR-380-5p  | 0.954137          | 0.956562          | 0.506      | 1.000              |
| hsa-miR-3182    | 0.967890          | 0.969529          | 0.520      | 0.997              |
| hsa-miR-330-5p  | 0.982107          | 0.982938          | 0.500      | 1.001              |
| hsa-miR-943     | 0.990536          | 0.990536          | 0.517      | 1.001              |

**eTable 7. Signatures for the Comparison of Lung Cancer Cases Versus Patients With Non-Cancer Lung Diseases.** The "largely matched" cohort comprises all samples of our study, which were chosen to have a similar age, gender and smoking status distribution. The "perfectly matched" cohort corresponds to a more stringent comparison, containing only samples for which another sample in the other group could be found, such that gender and smoking status are equal and age differs by at most one year.

| Cohort comparison | miRNA signature                                                                                                                                                                                        |
|-------------------|--------------------------------------------------------------------------------------------------------------------------------------------------------------------------------------------------------|
| largely matched   | hsa-let-7g-3p,hsa-miR-1202,hsa-miR-1285-3p,hsa-miR-17-3p,hsa-miR-193a-5p,hsa-miR-205-5p,hsa-miR-21-3p,hsa-miR-3610,hsa-miR-4282,hsa-miR-4286,hsa-miR-452-3p,hsa-miR-516a-3p,hsa-miR-572,hsa-miR-625-5p |
| perfectly matched | hsa-let-7g-3p,hsa-miR-1255a,hsa-miR-1285-3p,hsa-miR-17-3p,hsa-miR-181d-5p,hsa-miR-205-5p,hsa-miR-21-3p,hsa-miR-4281,hsa-miR-4282,hsa-miR-452-3p,hsa-miR-625-5p,hsa-miR-888-5p                          |

**eTable 8. Result Metrics for the Comparison of Low Lung Cancer Stages Versus All Non-Lung-Cancer Patients**

| miRNA            | ttest_rawp | ttest_adjp | AUC   | fold_change |
|------------------|------------|------------|-------|-------------|
| hsa-miR-126-5p   | 5.22E-59   | 6.18E-56   | 0.829 | 0.532       |
| hsa-miR-374c-5p  | 1.38E-42   | 8.16E-40   | 0.791 | 0.444       |
| hsa-miR-374a-5p  | 3.93E-39   | 1.55E-36   | 0.805 | 0.315       |
| hsa-miR-582-5p   | 4.19E-37   | 1.07E-34   | 0.737 | 0.763       |
| hsa-miR-144-5p   | 4.54E-37   | 1.07E-34   | 0.806 | 0.312       |
| hsa-miR-374b-5p  | 2.12E-36   | 4.17E-34   | 0.830 | 0.351       |
| hsa-miR-126-3p   | 1.27E-34   | 2.15E-32   | 0.813 | 0.395       |
| hsa-miR-26b-5p   | 1.69E-34   | 2.50E-32   | 0.797 | 0.386       |
| hsa-miR-140-5p   | 5.98E-34   | 7.86E-32   | 0.797 | 0.470       |
| hsa-miR-450a-5p  | 7.17E-34   | 8.49E-32   | 0.757 | 0.831       |
| hsa-miR-195-5p   | 2.00E-33   | 2.15E-31   | 0.780 | 0.456       |
| hsa-miR-18a-5p   | 3.42E-33   | 3.37E-31   | 0.779 | 0.409       |
| hsa-miR-18b-5p   | 5.90E-33   | 5.37E-31   | 0.780 | 0.468       |
| hsa-miR-20a-5p   | 1.60E-32   | 1.35E-30   | 0.804 | 0.444       |
| hsa-miR-20b-5p   | 5.73E-31   | 4.52E-29   | 0.802 | 0.478       |
| hsa-miR-30d-5p   | 1.14E-30   | 8.24E-29   | 0.780 | 2.168       |
| hsa-miR-101-5p   | 1.18E-30   | 8.24E-29   | 0.668 | 0.736       |
| hsa-miR-17-5p    | 2.42E-30   | 1.59E-28   | 0.801 | 0.486       |
| hsa-miR-505-3p   | 3.78E-30   | 2.35E-28   | 0.812 | 1.877       |
| hsa-miR-15a-5p   | 4.54E-30   | 2.69E-28   | 0.809 | 0.447       |
| hsa-miR-190a-5p  | 4.74E-29   | 2.67E-27   | 0.680 | 0.832       |
| hsa-miR-181b-5p  | 1.44E-28   | 7.74E-27   | 0.745 | 1.396       |
| hsa-miR-196b-5p  | 2.57E-28   | 1.32E-26   | 0.766 | 0.644       |
| hsa-miR-660-5p   | 4.83E-28   | 2.38E-26   | 0.792 | 0.514       |
| hsa-miR-16-5p    | 8.32E-28   | 3.94E-26   | 0.806 | 0.517       |
| hsa-miR-629-3p   | 1.06E-27   | 4.84E-26   | 0.772 | 1.426       |
| hsa-miR-590-5p   | 1.25E-27   | 5.50E-26   | 0.739 | 0.484       |
| hsa-miR-624-5p   | 1.84E-27   | 7.78E-26   | 0.740 | 0.588       |
| hsa-miR-320c     | 2.06E-27   | 8.39E-26   | 0.747 | 1.941       |
| hsa-miR-26a-1-3p | 3.06E-27   | 1.20E-25   | 0.684 | 0.875       |
| hsa-miR-20a-3p   | 3.46E-27   | 1.32E-25   | 0.710 | 0.742       |
| hsa-let-7g-5p    | 8.50E-27   | 3.14E-25   | 0.769 | 0.562       |
| hsa-miR-665      | 1.48E-26   | 5.29E-25   | 0.768 | 1.446       |
| hsa-miR-598-3p   | 3.74E-26   | 1.30E-24   | 0.717 | 0.783       |
| hsa-miR-27a-3p   | 5.76E-26   | 1.95E-24   | 0.760 | 0.514       |
| hsa-miR-96-5p    | 6.26E-26   | 2.06E-24   | 0.757 | 0.536       |
| hsa-miR-199a-3p  | 1.68E-25   | 5.36E-24   | 0.759 | 0.558       |
| hsa-miR-1260a    | 1.98E-25   | 6.18E-24   | 0.760 | 3.935       |
| hsa-miR-101-3p   | 3.44E-25   | 1.04E-23   | 0.745 | 0.439       |
| hsa-let-7i-3p    | 5.65E-25   | 1.67E-23   | 0.698 | 0.938       |
| hsa-miR-369-5p   | 2.81E-24   | 8.10E-23   | 0.715 | 0.881       |
| hsa-miR-378b     | 3.47E-24   | 9.76E-23   | 0.804 | 1.579       |
| hsa-miR-21-5p    | 3.98E-24   | 1.09E-22   | 0.779 | 0.517       |
| hsa-miR-3154     | 7.19E-24   | 1.93E-22   | 0.758 | 1.184       |

| <b>miRNA</b>    | <b>ttest_rawp</b> | <b>ttest_adjp</b> | <b>AUC</b> | <b>fold_change</b> |
|-----------------|-------------------|-------------------|------------|--------------------|
| hsa-miR-454-3p  | 7.99E-24          | 2.10E-22          | 0.736      | 0.510              |
| hsa-miR-655-3p  | 1.11E-23          | 2.82E-22          | 0.690      | 0.946              |
| hsa-miR-1285-3p | 1.12E-23          | 2.82E-22          | 0.809      | 1.672              |
| hsa-miR-424-5p  | 1.27E-23          | 3.13E-22          | 0.726      | 0.538              |
| hsa-miR-575     | 1.51E-23          | 3.65E-22          | 0.754      | 1.962              |
| hsa-miR-148a-3p | 1.96E-23          | 4.63E-22          | 0.747      | 0.504              |
| hsa-miR-221-5p  | 3.78E-23          | 8.77E-22          | 0.711      | 0.828              |
| hsa-miR-301a-3p | 4.39E-23          | 9.99E-22          | 0.729      | 0.562              |
| hsa-miR-1260b   | 9.42E-23          | 2.10E-21          | 0.761      | 4.475              |
| hsa-miR-320e    | 3.10E-22          | 6.80E-21          | 0.777      | 1.855              |
| hsa-miR-30a-5p  | 4.49E-22          | 9.57E-21          | 0.757      | 6.557              |
| hsa-miR-23a-5p  | 4.53E-22          | 9.57E-21          | 0.768      | 1.120              |
| hsa-miR-320d    | 1.12E-21          | 2.33E-20          | 0.772      | 1.828              |
| hsa-miR-145-5p  | 1.25E-21          | 2.54E-20          | 0.760      | 1.936              |
| hsa-miR-628-5p  | 1.30E-21          | 2.61E-20          | 0.666      | 0.818              |
| hsa-miR-320b    | 1.34E-21          | 2.65E-20          | 0.730      | 1.551              |
| hsa-miR-320a    | 1.48E-21          | 2.87E-20          | 0.703      | 1.602              |
| hsa-miR-103a-3p | 4.23E-21          | 8.07E-20          | 0.748      | 0.643              |
| hsa-miR-363-3p  | 5.66E-21          | 1.06E-19          | 0.760      | 0.556              |
| hsa-miR-148b-5p | 1.24E-20          | 2.28E-19          | 0.659      | 0.829              |
| hsa-miR-132-5p  | 3.49E-20          | 6.35E-19          | 0.704      | 0.919              |
| hsa-miR-548e-3p | 4.83E-20          | 8.65E-19          | 0.649      | 0.887              |
| hsa-miR-326     | 7.17E-20          | 1.27E-18          | 0.746      | 1.663              |
| hsa-miR-93-5p   | 1.07E-19          | 1.85E-18          | 0.718      | 0.592              |
| hsa-miR-106b-5p | 1.45E-19          | 2.49E-18          | 0.753      | 0.575              |
| hsa-miR-378a-5p | 1.90E-19          | 3.21E-18          | 0.738      | 1.757              |
| hsa-miR-3074-3p | 2.21E-19          | 3.69E-18          | 0.661      | 0.921              |
| hsa-miR-576-5p  | 2.74E-19          | 4.50E-18          | 0.643      | 0.862              |
| hsa-miR-4291    | 3.01E-19          | 4.88E-18          | 0.709      | 0.705              |
| hsa-miR-27b-3p  | 3.14E-19          | 5.02E-18          | 0.728      | 0.903              |
| hsa-miR-29c-5p  | 3.69E-19          | 5.83E-18          | 0.749      | 1.961              |
| hsa-miR-99b-5p  | 4.80E-19          | 7.47E-18          | 0.716      | 1.660              |
| hsa-miR-3127-5p | 5.79E-19          | 8.89E-18          | 0.719      | 1.577              |
| hsa-miR-154-3p  | 2.60E-18          | 3.94E-17          | 0.684      | 0.949              |
| hsa-miR-548x-3p | 4.89E-18          | 7.33E-17          | 0.626      | 0.935              |
| hsa-miR-1273c   | 6.37E-18          | 9.42E-17          | 0.750      | 1.187              |
| hsa-miR-3115    | 6.66E-18          | 9.61E-17          | 0.695      | 0.946              |
| hsa-miR-551b-3p | 6.66E-18          | 9.61E-17          | 0.723      | 0.922              |
| hsa-miR-539-5p  | 7.46E-18          | 1.06E-16          | 0.706      | 0.916              |
| hsa-miR-493-5p  | 1.08E-17          | 1.52E-16          | 0.690      | 0.918              |
| hsa-miR-874-3p  | 1.21E-17          | 1.68E-16          | 0.716      | 1.390              |
| hsa-miR-3615    | 1.45E-17          | 1.99E-16          | 0.718      | 1.154              |
| hsa-miR-760     | 1.93E-17          | 2.62E-16          | 0.735      | 1.137              |
| hsa-let-7i-5p   | 1.95E-17          | 2.62E-16          | 0.706      | 0.651              |
| hsa-miR-130a-3p | 2.82E-17          | 3.74E-16          | 0.708      | 0.658              |
| hsa-miR-3198    | 3.11E-17          | 4.08E-16          | 0.706      | 1.737              |



| <b>miRNA</b>     | <b>ttest_rawp</b> | <b>ttest_adjp</b> | <b>AUC</b> | <b>fold_change</b> |
|------------------|-------------------|-------------------|------------|--------------------|
| hsa-miR-26a-5p   | 4.79E-17          | 6.22E-16          | 0.714      | 0.691              |
| hsa-let-7f-5p    | 5.41E-17          | 6.96E-16          | 0.709      | 0.704              |
| hsa-miR-1295a    | 6.84E-17          | 8.70E-16          | 0.732      | 1.094              |
| hsa-miR-144-3p   | 8.65E-17          | 1.09E-15          | 0.694      | 0.527              |
| hsa-miR-34b-3p   | 9.39E-17          | 1.17E-15          | 0.590      | 0.834              |
| hsa-miR-181a-5p  | 9.46E-17          | 1.17E-15          | 0.691      | 1.482              |
| hsa-miR-98-5p    | 1.07E-16          | 1.31E-15          | 0.687      | 0.603              |
| hsa-miR-3616-3p  | 1.29E-16          | 1.55E-15          | 0.631      | 0.840              |
| hsa-miR-324-3p   | 1.58E-16          | 1.89E-15          | 0.761      | 1.585              |
| hsa-miR-3125     | 1.60E-16          | 1.89E-15          | 0.699      | 1.414              |
| hsa-miR-146b-5p  | 2.18E-16          | 2.55E-15          | 0.675      | 0.619              |
| hsa-miR-3156-5p  | 2.21E-16          | 2.56E-15          | 0.705      | 1.493              |
| hsa-miR-107      | 2.67E-16          | 3.07E-15          | 0.711      | 0.700              |
| hsa-miR-548c-3p  | 3.04E-16          | 3.46E-15          | 0.621      | 0.920              |
| hsa-miR-654-5p   | 3.33E-16          | 3.75E-15          | 0.702      | 1.079              |
| hsa-miR-330-3p   | 4.45E-16          | 4.96E-15          | 0.694      | 1.327              |
| hsa-miR-921      | 4.52E-16          | 5.00E-15          | 0.702      | 1.084              |
| hsa-let-7a-5p    | 4.89E-16          | 5.36E-15          | 0.695      | 0.742              |
| hsa-let-7e-3p    | 6.15E-16          | 6.68E-15          | 0.644      | 0.939              |
| hsa-miR-4314     | 6.93E-16          | 7.45E-15          | 0.724      | 1.099              |
| hsa-let-7d-3p    | 1.12E-15          | 1.19E-14          | 0.723      | 1.110              |
| hsa-miR-572      | 1.37E-15          | 1.45E-14          | 0.646      | 0.789              |
| hsa-let-7d-5p    | 1.43E-15          | 1.48E-14          | 0.705      | 0.719              |
| hsa-miR-4289     | 1.43E-15          | 1.48E-14          | 0.668      | 0.969              |
| hsa-miR-4290     | 1.45E-15          | 1.49E-14          | 0.612      | 0.826              |
| hsa-miR-7-5p     | 1.46E-15          | 1.49E-14          | 0.697      | 0.623              |
| hsa-miR-1290     | 1.53E-15          | 1.54E-14          | 0.729      | 1.360              |
| hsa-miR-4307     | 2.05E-15          | 2.06E-14          | 0.619      | 0.903              |
| hsa-miR-19a-3p   | 2.19E-15          | 2.17E-14          | 0.700      | 0.587              |
| hsa-miR-186-5p   | 2.49E-15          | 2.46E-14          | 0.729      | 2.066              |
| hsa-miR-591      | 2.63E-15          | 2.57E-14          | 0.666      | 0.962              |
| hsa-miR-1976     | 2.87E-15          | 2.78E-14          | 0.709      | 1.385              |
| hsa-miR-4275     | 3.81E-15          | 3.67E-14          | 0.646      | 0.957              |
| hsa-miR-29b-1-5p | 4.36E-15          | 4.16E-14          | 0.674      | 0.845              |
| hsa-miR-584-5p   | 4.66E-15          | 4.41E-14          | 0.702      | 1.429              |
| hsa-miR-4323     | 4.86E-15          | 4.56E-14          | 0.688      | 1.375              |
| hsa-miR-3193     | 7.74E-15          | 7.21E-14          | 0.706      | 1.059              |
| hsa-miR-1301-3p  | 8.08E-15          | 7.47E-14          | 0.687      | 1.055              |
| hsa-miR-4282     | 8.87E-15          | 8.14E-14          | 0.686      | 1.039              |
| hsa-miR-1305     | 1.16E-14          | 1.06E-13          | 0.688      | 1.469              |
| hsa-miR-515-3p   | 1.94E-14          | 1.75E-13          | 0.660      | 0.927              |
| hsa-miR-501-5p   | 2.35E-14          | 2.11E-13          | 0.714      | 1.484              |
| hsa-miR-296-5p   | 2.98E-14          | 2.65E-13          | 0.692      | 1.657              |
| hsa-miR-3135a    | 3.06E-14          | 2.70E-13          | 0.686      | 1.044              |
| hsa-miR-532-5p   | 4.38E-14          | 3.84E-13          | 0.697      | 0.721              |
| hsa-miR-502-5p   | 4.50E-14          | 3.91E-13          | 0.675      | 0.727              |

| <b>miRNA</b>      | <b>ttest_rawp</b> | <b>ttest_adjp</b> | <b>AUC</b> | <b>fold_change</b> |
|-------------------|-------------------|-------------------|------------|--------------------|
| hsa-miR-3141      | 4.92E-14          | 4.25E-13          | 0.725      | 9.075              |
| hsa-miR-183-5p    | 5.35E-14          | 4.59E-13          | 0.685      | 0.797              |
| hsa-miR-574-3p    | 6.38E-14          | 5.43E-13          | 0.695      | 1.820              |
| hsa-miR-143-3p    | 7.84E-14          | 6.62E-13          | 0.625      | 0.943              |
| hsa-miR-151a-3p   | 8.22E-14          | 6.90E-13          | 0.719      | 1.816              |
| hsa-miR-135a-5p   | 1.53E-13          | 1.28E-12          | 0.650      | 0.916              |
| hsa-miR-365a-3p   | 1.78E-13          | 1.47E-12          | 0.668      | 1.377              |
| hsa-miR-3126-5p   | 1.79E-13          | 1.47E-12          | 0.677      | 1.040              |
| hsa-miR-452-3p    | 1.82E-13          | 1.48E-12          | 0.675      | 1.040              |
| hsa-miR-491-3p    | 2.27E-13          | 1.84E-12          | 0.571      | 0.907              |
| hsa-miR-3177-3p   | 2.41E-13          | 1.94E-12          | 0.677      | 1.055              |
| hsa-miR-4281      | 2.73E-13          | 2.18E-12          | 0.694      | 8.446              |
| hsa-miR-4328      | 2.76E-13          | 2.19E-12          | 0.668      | 1.041              |
| hsa-miR-197-3p    | 3.07E-13          | 2.42E-12          | 0.683      | 1.488              |
| hsa-miR-519e-3p   | 3.34E-13          | 2.61E-12          | 0.636      | 0.925              |
| hsa-miR-193a-5p   | 3.76E-13          | 2.93E-12          | 0.662      | 1.280              |
| hsa-miR-1208      | 4.61E-13          | 3.56E-12          | 0.669      | 1.040              |
| hsa-miR-145-3p    | 4.71E-13          | 3.62E-12          | 0.611      | 0.946              |
| hsa-miR-613       | 5.06E-13          | 3.84E-12          | 0.632      | 0.797              |
| hsa-miR-940       | 5.07E-13          | 3.84E-12          | 0.710      | 2.162              |
| hsa-miR-589-3p    | 5.32E-13          | 4.01E-12          | 0.673      | 1.168              |
| hsa-miR-3140-3p   | 5.80E-13          | 4.34E-12          | 0.659      | 0.963              |
| hsa-miR-324-5p    | 7.13E-13          | 5.30E-12          | 0.768      | 1.501              |
| hsa-miR-380-3p    | 7.66E-13          | 5.66E-12          | 0.643      | 0.948              |
| hsa-miR-29b-2-5p  | 9.34E-13          | 6.87E-12          | 0.654      | 0.921              |
| hsa-miR-548d-3p   | 1.01E-12          | 7.41E-12          | 0.628      | 0.959              |
| hsa-miR-3684      | 1.20E-12          | 8.70E-12          | 0.641      | 0.961              |
| hsa-miR-766-3p    | 1.41E-12          | 1.02E-11          | 0.666      | 1.427              |
| hsa-miR-7-1-3p    | 1.46E-12          | 1.05E-11          | 0.655      | 0.645              |
| hsa-miR-500a-3p   | 1.64E-12          | 1.17E-11          | 0.693      | 1.361              |
| hsa-miR-500b-5p   | 1.91E-12          | 1.35E-11          | 0.698      | 1.438              |
| hsa-miR-3934-5p   | 2.03E-12          | 1.43E-11          | 0.695      | 1.374              |
| hsa-miR-3605-5p   | 2.62E-12          | 1.83E-11          | 0.697      | 1.078              |
| hsa-let-7a-3p     | 2.63E-12          | 1.83E-11          | 0.624      | 0.945              |
| hsa-miR-15b-3p    | 2.69E-12          | 1.86E-11          | 0.617      | 0.703              |
| hsa-miR-764       | 3.09E-12          | 2.13E-11          | 0.625      | 0.902              |
| hsa-miR-196a-3p   | 3.76E-12          | 2.57E-11          | 0.678      | 1.076              |
| hsa-miR-4326      | 3.85E-12          | 2.62E-11          | 0.661      | 1.197              |
| hsa-miR-3144-3p   | 3.95E-12          | 2.67E-11          | 0.631      | 0.962              |
| hsa-miR-376c-3p   | 4.08E-12          | 2.74E-11          | 0.616      | 0.785              |
| hsa-miR-3916      | 4.26E-12          | 2.85E-11          | 0.648      | 0.960              |
| hsa-miR-484       | 4.77E-12          | 3.17E-11          | 0.734      | 1.799              |
| hsa-miR-361-3p    | 5.54E-12          | 3.66E-11          | 0.737      | 1.572              |
| hsa-miR-423-5p    | 5.87E-12          | 3.86E-11          | 0.690      | 1.534              |
| hsa-miR-219a-2-3p | 6.37E-12          | 4.16E-11          | 0.656      | 0.973              |
| hsa-miR-29a-5p    | 7.50E-12          | 4.87E-11          | 0.608      | 0.927              |

| miRNA           | ttest_rawp | ttest_adjp | AUC   | fold_change |
|-----------------|------------|------------|-------|-------------|
| hsa-miR-214-3p  | 8.72E-12   | 5.64E-11   | 0.687 | 1.078       |
| hsa-miR-548m    | 9.67E-12   | 6.22E-11   | 0.643 | 0.940       |
| hsa-miR-643     | 1.13E-11   | 7.21E-11   | 0.607 | 0.966       |
| hsa-miR-28-3p   | 1.18E-11   | 7.50E-11   | 0.649 | 1.111       |
| hsa-miR-411-3p  | 1.20E-11   | 7.58E-11   | 0.633 | 0.947       |
| hsa-miR-224-5p  | 1.22E-11   | 7.70E-11   | 0.663 | 0.872       |
| hsa-miR-92b-3p  | 1.23E-11   | 7.73E-11   | 0.680 | 1.242       |
| hsa-miR-3138    | 1.29E-11   | 8.04E-11   | 0.753 | 4.516       |
| hsa-miR-223-5p  | 1.32E-11   | 8.15E-11   | 0.629 | 0.896       |
| hsa-miR-521     | 1.38E-11   | 8.50E-11   | 0.622 | 0.904       |
| hsa-miR-125a-5p | 1.57E-11   | 9.60E-11   | 0.655 | 1.397       |
| hsa-miR-548b-3p | 1.57E-11   | 9.60E-11   | 0.626 | 0.951       |
| hsa-miR-1276    | 1.79E-11   | 1.08E-10   | 0.666 | 1.057       |
| hsa-miR-942-5p  | 1.87E-11   | 1.13E-10   | 0.690 | 1.498       |
| hsa-miR-17-3p   | 1.96E-11   | 1.18E-10   | 0.642 | 0.666       |
| hsa-miR-3681-3p | 2.20E-11   | 1.31E-10   | 0.629 | 0.965       |
| hsa-miR-615-3p  | 2.35E-11   | 1.40E-10   | 0.623 | 0.925       |
| hsa-miR-3918    | 3.29E-11   | 1.95E-10   | 0.651 | 1.050       |
| hsa-miR-3920    | 3.42E-11   | 2.01E-10   | 0.602 | 0.944       |
| hsa-miR-3121-3p | 3.78E-11   | 2.22E-10   | 0.684 | 1.438       |
| hsa-miR-1914-3p | 3.92E-11   | 2.29E-10   | 0.664 | 1.367       |
| hsa-miR-9-3p    | 4.21E-11   | 2.44E-10   | 0.606 | 0.950       |
| hsa-miR-495-3p  | 4.47E-11   | 2.58E-10   | 0.634 | 0.744       |
| hsa-miR-3940-3p | 4.63E-11   | 2.66E-10   | 0.673 | 1.193       |
| hsa-miR-4298    | 4.95E-11   | 2.83E-10   | 0.694 | 6.438       |
| hsa-miR-365a-5p | 5.26E-11   | 2.99E-10   | 0.674 | 1.106       |
| hsa-miR-182-5p  | 6.56E-11   | 3.71E-10   | 0.660 | 0.686       |
| hsa-miR-449b-3p | 7.13E-11   | 4.01E-10   | 0.611 | 0.713       |
| hsa-miR-3679-5p | 7.16E-11   | 4.01E-10   | 0.674 | 6.287       |
| hsa-miR-892a    | 1.26E-10   | 7.02E-10   | 0.633 | 0.964       |
| hsa-miR-1179    | 1.40E-10   | 7.77E-10   | 0.632 | 0.967       |
| hsa-miR-106b-3p | 1.46E-10   | 8.05E-10   | 0.564 | 0.946       |
| hsa-miR-3607-3p | 1.86E-10   | 1.02E-09   | 0.587 | 0.911       |
| hsa-miR-3660    | 2.05E-10   | 1.12E-09   | 0.653 | 1.029       |
| hsa-miR-3926    | 2.20E-10   | 1.20E-09   | 0.679 | 1.831       |
| hsa-miR-433-3p  | 2.38E-10   | 1.29E-09   | 0.650 | 1.087       |
| hsa-miR-1265    | 2.64E-10   | 1.43E-09   | 0.629 | 0.967       |
| hsa-miR-16-2-3p | 2.74E-10   | 1.48E-09   | 0.539 | 0.351       |
| hsa-miR-3936    | 2.89E-10   | 1.55E-09   | 0.640 | 1.032       |
| hsa-miR-32-5p   | 2.99E-10   | 1.59E-09   | 0.643 | 0.938       |
| hsa-miR-1279    | 3.06E-10   | 1.62E-09   | 0.626 | 0.961       |
| hsa-miR-1207-3p | 4.31E-10   | 2.28E-09   | 0.607 | 0.972       |
| hsa-miR-3914    | 4.56E-10   | 2.40E-09   | 0.644 | 1.035       |
| hsa-miR-301b-3p | 4.87E-10   | 2.55E-09   | 0.616 | 0.959       |
| hsa-miR-556-3p  | 5.86E-10   | 3.05E-09   | 0.620 | 0.933       |
| hsa-miR-664a-5p | 6.48E-10   | 3.36E-09   | 0.652 | 1.346       |

| miRNA            | ttest_rawp | ttest_adjp | AUC   | fold_change |
|------------------|------------|------------|-------|-------------|
| hsa-miR-106a-3p  | 6.98E-10   | 3.61E-09   | 0.635 | 0.961       |
| hsa-miR-298      | 8.20E-10   | 4.21E-09   | 0.633 | 0.972       |
| hsa-miR-148b-3p  | 8.22E-10   | 4.21E-09   | 0.648 | 0.773       |
| hsa-miR-3667-3p  | 8.93E-10   | 4.55E-09   | 0.619 | 0.971       |
| hsa-miR-342-3p   | 1.18E-09   | 5.99E-09   | 0.698 | 1.427       |
| hsa-miR-1255b-5p | 1.20E-09   | 6.05E-09   | 0.612 | 1.209       |
| hsa-miR-202-3p   | 1.24E-09   | 6.26E-09   | 0.664 | 1.067       |
| hsa-miR-15b-5p   | 1.31E-09   | 6.59E-09   | 0.672 | 0.759       |
| hsa-miR-3613-5p  | 1.46E-09   | 7.29E-09   | 0.609 | 0.934       |
| hsa-miR-3124-5p  | 1.55E-09   | 7.72E-09   | 0.711 | 1.195       |
| hsa-miR-647      | 1.65E-09   | 8.18E-09   | 0.609 | 0.970       |
| hsa-miR-378c     | 1.71E-09   | 8.42E-09   | 0.633 | 1.068       |
| hsa-miR-1275     | 1.86E-09   | 9.13E-09   | 0.663 | 2.662       |
| hsa-miR-302a-3p  | 1.88E-09   | 9.19E-09   | 0.631 | 0.935       |
| hsa-miR-3137     | 2.04E-09   | 9.95E-09   | 0.658 | 1.282       |
| hsa-miR-152-3p   | 2.92E-09   | 1.42E-08   | 0.622 | 0.862       |
| hsa-miR-509-5p   | 2.97E-09   | 1.44E-08   | 0.647 | 1.056       |
| hsa-miR-30d-3p   | 3.59E-09   | 1.73E-08   | 0.608 | 0.974       |
| hsa-miR-559      | 3.71E-09   | 1.77E-08   | 0.580 | 0.966       |
| hsa-miR-373-5p   | 4.34E-09   | 2.07E-08   | 0.677 | 1.063       |
| hsa-miR-3605-3p  | 4.41E-09   | 2.10E-08   | 0.640 | 1.122       |
| hsa-miR-3680-3p  | 4.52E-09   | 2.14E-08   | 0.657 | 1.049       |
| hsa-miR-4315     | 4.56E-09   | 2.15E-08   | 0.634 | 1.032       |
| hsa-miR-3654     | 5.07E-09   | 2.38E-08   | 0.670 | 1.036       |
| hsa-miR-2110     | 5.28E-09   | 2.47E-08   | 0.637 | 1.239       |
| hsa-miR-1244     | 5.51E-09   | 2.56E-08   | 0.608 | 0.966       |
| hsa-miR-7-2-3p   | 6.92E-09   | 3.21E-08   | 0.597 | 0.967       |
| hsa-miR-205-5p   | 7.17E-09   | 3.31E-08   | 0.761 | 1.165       |
| hsa-miR-483-5p   | 7.33E-09   | 3.38E-08   | 0.688 | 4.139       |
| hsa-miR-3917     | 8.80E-09   | 4.04E-08   | 0.643 | 1.330       |
| hsa-miR-150-3p   | 1.17E-08   | 5.34E-08   | 0.758 | 6.342       |
| hsa-miR-1226-5p  | 1.20E-08   | 5.47E-08   | 0.721 | 1.219       |
| hsa-miR-3657     | 1.22E-08   | 5.52E-08   | 0.622 | 0.970       |
| hsa-miR-129-2-3p | 1.22E-08   | 5.53E-08   | 0.638 | 1.099       |
| hsa-miR-542-3p   | 1.24E-08   | 5.57E-08   | 0.616 | 0.954       |
| hsa-miR-34a-3p   | 1.25E-08   | 5.62E-08   | 0.607 | 0.979       |
| hsa-miR-3609     | 1.29E-08   | 5.77E-08   | 0.632 | 1.060       |
| hsa-miR-22-3p    | 1.37E-08   | 6.09E-08   | 0.702 | 1.250       |
| hsa-miR-331-3p   | 1.46E-08   | 6.47E-08   | 0.705 | 1.345       |
| hsa-miR-3611     | 1.47E-08   | 6.50E-08   | 0.641 | 1.034       |
| hsa-miR-520a-3p  | 1.48E-08   | 6.50E-08   | 0.617 | 0.924       |
| hsa-miR-222-3p   | 1.55E-08   | 6.78E-08   | 0.604 | 0.795       |
| hsa-miR-4257     | 1.59E-08   | 6.92E-08   | 0.646 | 1.442       |
| hsa-miR-3155a    | 1.61E-08   | 7.02E-08   | 0.628 | 1.020       |
| hsa-miR-519e-5p  | 1.63E-08   | 7.07E-08   | 0.634 | 1.052       |
| hsa-miR-2276-3p  | 1.77E-08   | 7.65E-08   | 0.706 | 1.611       |

| <b>miRNA</b>    | <b>ttest_rawp</b> | <b>ttest_adjp</b> | <b>AUC</b> | <b>fold_change</b> |
|-----------------|-------------------|-------------------|------------|--------------------|
| hsa-miR-3910    | 1.99E-08          | 8.56E-08          | 0.616      | 1.030              |
| hsa-miR-1268a   | 2.29E-08          | 9.82E-08          | 0.628      | 3.660              |
| hsa-miR-23a-3p  | 2.75E-08          | 1.18E-07          | 0.632      | 1.205              |
| hsa-miR-3174    | 3.32E-08          | 1.41E-07          | 0.624      | 1.042              |
| hsa-miR-1202    | 3.71E-08          | 1.57E-07          | 0.651      | 4.931              |
| hsa-miR-4286    | 3.79E-08          | 1.60E-07          | 0.624      | 4.445              |
| hsa-miR-579-3p  | 4.00E-08          | 1.68E-07          | 0.613      | 0.975              |
| hsa-miR-216b-5p | 4.39E-08          | 1.84E-07          | 0.614      | 1.035              |
| hsa-miR-609     | 4.45E-08          | 1.86E-07          | 0.625      | 0.950              |
| hsa-miR-892b    | 4.53E-08          | 1.89E-07          | 0.633      | 1.215              |
| hsa-miR-3147    | 4.61E-08          | 1.91E-07          | 0.712      | 1.346              |
| hsa-miR-485-3p  | 4.78E-08          | 1.98E-07          | 0.620      | 1.477              |
| hsa-miR-532-3p  | 5.18E-08          | 2.13E-07          | 0.699      | 1.405              |
| hsa-miR-520d-3p | 5.24E-08          | 2.15E-07          | 0.608      | 0.861              |
| hsa-miR-3195    | 5.57E-08          | 2.28E-07          | 0.636      | 6.755              |
| hsa-miR-29b-3p  | 6.04E-08          | 2.46E-07          | 0.617      | 0.735              |
| hsa-miR-487b-3p | 6.05E-08          | 2.46E-07          | 0.607      | 0.858              |
| hsa-miR-1284    | 6.39E-08          | 2.59E-07          | 0.616      | 0.965              |
| hsa-miR-21-3p   | 6.51E-08          | 2.63E-07          | 0.564      | 0.748              |
| hsa-miR-2053    | 7.05E-08          | 2.84E-07          | 0.602      | 0.945              |
| hsa-miR-302d-3p | 7.48E-08          | 3.00E-07          | 0.616      | 0.971              |
| hsa-miR-1183    | 7.67E-08          | 3.06E-07          | 0.623      | 2.795              |
| hsa-miR-361-5p  | 8.14E-08          | 3.24E-07          | 0.647      | 1.266              |
| hsa-miR-181d-5p | 8.17E-08          | 3.24E-07          | 0.649      | 1.016              |
| hsa-miR-410-3p  | 8.61E-08          | 3.41E-07          | 0.596      | 0.926              |
| hsa-miR-502-3p  | 9.00E-08          | 3.55E-07          | 0.654      | 1.300              |
| hsa-miR-424-3p  | 9.23E-08          | 3.63E-07          | 0.670      | 1.147              |
| hsa-miR-551b-5p | 9.74E-08          | 3.81E-07          | 0.629      | 1.026              |
| hsa-miR-379-3p  | 1.10E-07          | 4.30E-07          | 0.613      | 0.977              |
| hsa-miR-1908-5p | 1.22E-07          | 4.77E-07          | 0.621      | 1.036              |
| hsa-miR-1256    | 1.47E-07          | 5.71E-07          | 0.602      | 0.974              |
| hsa-miR-214-5p  | 1.51E-07          | 5.83E-07          | 0.615      | 0.980              |
| hsa-miR-22-5p   | 1.53E-07          | 5.90E-07          | 0.613      | 0.808              |
| hsa-miR-1204    | 1.59E-07          | 6.10E-07          | 0.615      | 0.965              |
| hsa-miR-202-5p  | 1.62E-07          | 6.22E-07          | 0.595      | 0.955              |
| hsa-miR-362-3p  | 1.70E-07          | 6.50E-07          | 0.618      | 0.740              |
| hsa-miR-379-5p  | 1.79E-07          | 6.82E-07          | 0.584      | 0.970              |
| hsa-miR-658     | 1.92E-07          | 7.28E-07          | 0.609      | 0.974              |
| hsa-miR-564     | 2.21E-07          | 8.36E-07          | 0.585      | 0.784              |
| hsa-miR-3161    | 2.29E-07          | 8.60E-07          | 0.651      | 1.048              |
| hsa-miR-130a-5p | 2.29E-07          | 8.60E-07          | 0.594      | 0.920              |
| hsa-miR-1273d   | 2.41E-07          | 9.01E-07          | 0.632      | 1.289              |
| hsa-miR-622     | 2.43E-07          | 9.07E-07          | 0.599      | 2.035              |
| hsa-miR-192-3p  | 2.58E-07          | 9.59E-07          | 0.603      | 0.873              |
| hsa-miR-615-5p  | 2.60E-07          | 9.65E-07          | 0.586      | 1.101              |
| hsa-miR-494-3p  | 2.61E-07          | 9.65E-07          | 0.647      | 1.288              |

| miRNA            | ttest_rawp | ttest_adjp | AUC   | fold_change |
|------------------|------------|------------|-------|-------------|
| hsa-miR-3653-3p  | 2.95E-07   | 1.09E-06   | 0.656 | 1.583       |
| hsa-miR-3922-3p  | 3.11E-07   | 1.14E-06   | 0.578 | 0.968       |
| hsa-miR-199b-5p  | 3.41E-07   | 1.25E-06   | 0.604 | 0.749       |
| hsa-miR-548t-5p  | 3.55E-07   | 1.30E-06   | 0.636 | 0.966       |
| hsa-miR-3130-5p  | 3.80E-07   | 1.38E-06   | 0.619 | 1.053       |
| hsa-miR-512-3p   | 4.01E-07   | 1.46E-06   | 0.620 | 1.027       |
| hsa-miR-1224-5p  | 4.82E-07   | 1.75E-06   | 0.616 | 2.158       |
| hsa-miR-1471     | 5.13E-07   | 1.85E-06   | 0.647 | 2.792       |
| hsa-miR-499a-5p  | 5.51E-07   | 1.98E-06   | 0.616 | 0.973       |
| hsa-miR-1185-5p  | 5.65E-07   | 2.02E-06   | 0.607 | 0.974       |
| hsa-miR-1972     | 5.71E-07   | 2.04E-06   | 0.637 | 5.359       |
| hsa-miR-488-3p   | 5.81E-07   | 2.07E-06   | 0.607 | 0.979       |
| hsa-miR-497-5p   | 5.87E-07   | 2.09E-06   | 0.601 | 0.922       |
| hsa-miR-1248     | 5.89E-07   | 2.09E-06   | 0.611 | 1.024       |
| hsa-miR-1973     | 6.21E-07   | 2.19E-06   | 0.600 | 1.647       |
| hsa-miR-522-3p   | 6.22E-07   | 2.19E-06   | 0.603 | 0.966       |
| hsa-miR-548k     | 6.29E-07   | 2.21E-06   | 0.612 | 0.979       |
| hsa-miR-449b-5p  | 6.34E-07   | 2.21E-06   | 0.605 | 0.975       |
| hsa-miR-3183     | 6.34E-07   | 2.21E-06   | 0.584 | 1.057       |
| hsa-miR-566      | 6.45E-07   | 2.24E-06   | 0.603 | 1.280       |
| hsa-miR-452-5p   | 6.95E-07   | 2.41E-06   | 0.606 | 1.021       |
| hsa-miR-449a     | 6.99E-07   | 2.42E-06   | 0.608 | 0.967       |
| hsa-miR-4327     | 7.65E-07   | 2.64E-06   | 0.765 | 6.653       |
| hsa-miR-342-5p   | 7.76E-07   | 2.67E-06   | 0.652 | 1.444       |
| hsa-miR-449c-3p  | 7.86E-07   | 2.69E-06   | 0.655 | 0.950       |
| hsa-miR-3152-3p  | 8.75E-07   | 2.99E-06   | 0.626 | 3.005       |
| hsa-miR-24-3p    | 8.96E-07   | 3.05E-06   | 0.602 | 0.873       |
| hsa-miR-875-3p   | 9.32E-07   | 3.16E-06   | 0.615 | 1.021       |
| hsa-miR-4262     | 9.32E-07   | 3.16E-06   | 0.593 | 0.983       |
| hsa-miR-524-3p   | 9.34E-07   | 3.16E-06   | 0.609 | 0.976       |
| hsa-miR-130b-5p  | 9.78E-07   | 3.30E-06   | 0.619 | 1.126       |
| hsa-miR-328-3p   | 9.97E-07   | 3.35E-06   | 0.624 | 1.134       |
| hsa-miR-421      | 1.11E-06   | 3.73E-06   | 0.616 | 0.923       |
| hsa-miR-221-3p   | 1.15E-06   | 3.83E-06   | 0.597 | 0.797       |
| hsa-miR-520h     | 1.15E-06   | 3.85E-06   | 0.616 | 0.962       |
| hsa-miR-3614-3p  | 1.22E-06   | 4.05E-06   | 0.619 | 0.972       |
| hsa-miR-3622b-5p | 1.27E-06   | 4.22E-06   | 0.612 | 1.056       |
| hsa-miR-548a-3p  | 1.31E-06   | 4.32E-06   | 0.588 | 0.978       |
| hsa-miR-617      | 1.34E-06   | 4.42E-06   | 0.605 | 0.911       |
| hsa-miR-136-5p   | 1.41E-06   | 4.62E-06   | 0.615 | 0.938       |
| hsa-miR-3621     | 1.53E-06   | 5.00E-06   | 0.619 | 1.025       |
| hsa-miR-576-3p   | 1.65E-06   | 5.39E-06   | 0.600 | 1.044       |
| hsa-miR-3166     | 1.70E-06   | 5.55E-06   | 0.596 | 0.982       |
| hsa-miR-335-5p   | 1.74E-06   | 5.67E-06   | 0.588 | 0.757       |
| hsa-miR-199a-5p  | 1.78E-06   | 5.77E-06   | 0.619 | 1.422       |
| hsa-miR-656-3p   | 1.85E-06   | 5.98E-06   | 0.624 | 0.963       |

| <b>miRNA</b>     | <b>ttest_rawp</b> | <b>ttest_adjp</b> | <b>AUC</b> | <b>fold_change</b> |
|------------------|-------------------|-------------------|------------|--------------------|
| hsa-miR-450b-3p  | 1.98E-06          | 6.38E-06          | 0.573      | 0.974              |
| hsa-miR-26a-2-3p | 2.11E-06          | 6.77E-06          | 0.594      | 0.941              |
| hsa-miR-181c-3p  | 2.37E-06          | 7.60E-06          | 0.602      | 1.089              |
| hsa-miR-4319     | 2.55E-06          | 8.14E-06          | 0.593      | 1.039              |
| hsa-miR-1537-3p  | 2.61E-06          | 8.29E-06          | 0.590      | 0.981              |
| hsa-miR-3179     | 2.61E-06          | 8.29E-06          | 0.601      | 1.061              |
| hsa-miR-4284     | 2.62E-06          | 8.31E-06          | 0.618      | 1.230              |
| hsa-miR-122-3p   | 2.89E-06          | 9.14E-06          | 0.573      | 0.957              |
| hsa-miR-4311     | 2.90E-06          | 9.14E-06          | 0.589      | 1.051              |
| hsa-miR-3663-3p  | 3.07E-06          | 9.67E-06          | 0.716      | 54.391             |
| hsa-miR-4320     | 3.17E-06          | 9.95E-06          | 0.609      | 0.979              |
| hsa-miR-526b-3p  | 3.52E-06          | 1.10E-05          | 0.620      | 0.964              |
| hsa-miR-200a-5p  | 3.65E-06          | 1.14E-05          | 0.606      | 1.028              |
| hsa-miR-3652     | 3.74E-06          | 1.16E-05          | 0.596      | 1.368              |
| hsa-miR-4318     | 3.75E-06          | 1.16E-05          | 0.571      | 0.798              |
| hsa-miR-1228-5p  | 4.02E-06          | 1.24E-05          | 0.609      | 1.118              |
| hsa-miR-487a-3p  | 4.03E-06          | 1.24E-05          | 0.574      | 0.956              |
| hsa-miR-184      | 4.05E-06          | 1.24E-05          | 0.641      | 0.997              |
| hsa-miR-99a-3p   | 4.05E-06          | 1.24E-05          | 0.598      | 0.981              |
| hsa-miR-3171     | 4.06E-06          | 1.24E-05          | 0.585      | 0.959              |
| hsa-miR-4254     | 4.23E-06          | 1.29E-05          | 0.576      | 0.832              |
| hsa-miR-4280     | 4.45E-06          | 1.36E-05          | 0.607      | 1.023              |
| hsa-miR-1321     | 4.61E-06          | 1.40E-05          | 0.611      | 1.028              |
| hsa-miR-1247-5p  | 4.70E-06          | 1.43E-05          | 0.623      | 1.055              |
| hsa-miR-125b-5p  | 4.72E-06          | 1.43E-05          | 0.601      | 1.692              |
| hsa-miR-664a-3p  | 4.80E-06          | 1.45E-05          | 0.618      | 1.314              |
| hsa-miR-873-5p   | 4.91E-06          | 1.48E-05          | 0.619      | 0.977              |
| hsa-miR-570-3p   | 5.18E-06          | 1.55E-05          | 0.594      | 0.972              |
| hsa-miR-548p     | 5.18E-06          | 1.55E-05          | 0.593      | 1.021              |
| hsa-miR-302b-3p  | 5.22E-06          | 1.56E-05          | 0.618      | 0.962              |
| hsa-miR-513a-5p  | 5.47E-06          | 1.63E-05          | 0.611      | 1.144              |
| hsa-miR-744-5p   | 5.52E-06          | 1.64E-05          | 0.689      | 1.260              |
| hsa-miR-586      | 5.56E-06          | 1.65E-05          | 0.588      | 0.974              |
| hsa-miR-24-2-5p  | 5.60E-06          | 1.65E-05          | 0.607      | 1.020              |
| hsa-miR-520c-3p  | 6.10E-06          | 1.80E-05          | 0.615      | 0.961              |
| hsa-miR-211-5p   | 6.32E-06          | 1.86E-05          | 0.510      | 0.854              |
| hsa-miR-765      | 6.38E-06          | 1.87E-05          | 0.681      | 1.559              |
| hsa-miR-762      | 6.49E-06          | 1.90E-05          | 0.646      | 3.777              |
| hsa-miR-302c-3p  | 6.61E-06          | 1.93E-05          | 0.551      | 0.968              |
| hsa-miR-1324     | 6.86E-06          | 2.00E-05          | 0.610      | 0.977              |
| hsa-miR-4308     | 6.95E-06          | 2.02E-05          | 0.596      | 0.980              |
| hsa-miR-548y     | 7.27E-06          | 2.11E-05          | 0.554      | 0.942              |
| hsa-miR-9-5p     | 7.51E-06          | 2.17E-05          | 0.570      | 0.980              |
| hsa-miR-302a-5p  | 7.92E-06          | 2.28E-05          | 0.586      | 0.981              |
| hsa-miR-411-5p   | 8.16E-06          | 2.35E-05          | 0.597      | 0.981              |
| hsa-miR-1181     | 9.04E-06          | 2.60E-05          | 0.656      | 2.101              |

| <b>miRNA</b>    | <b>ttest_rawp</b> | <b>ttest_adjp</b> | <b>AUC</b> | <b>fold_change</b> |
|-----------------|-------------------|-------------------|------------|--------------------|
| hsa-miR-1207-5p | 9.09E-06          | 2.60E-05          | 0.601      | 5.802              |
| hsa-miR-377-3p  | 9.11E-06          | 2.60E-05          | 0.597      | 0.908              |
| hsa-miR-1270    | 9.29E-06          | 2.65E-05          | 0.601      | 1.102              |
| hsa-miR-3170    | 9.66E-06          | 2.75E-05          | 0.506      | 0.941              |
| hsa-miR-4267    | 9.84E-06          | 2.79E-05          | 0.587      | 1.020              |
| hsa-miR-550a-3p | 9.93E-06          | 2.81E-05          | 0.673      | 1.398              |
| hsa-miR-625-5p  | 1.02E-05          | 2.89E-05          | 0.664      | 1.381              |
| hsa-miR-28-5p   | 1.03E-05          | 2.90E-05          | 0.598      | 0.836              |
| hsa-miR-3943    | 1.07E-05          | 3.00E-05          | 0.576      | 0.977              |
| hsa-miR-504-5p  | 1.14E-05          | 3.19E-05          | 0.602      | 0.981              |
| hsa-miR-1299    | 1.19E-05          | 3.34E-05          | 0.687      | 1.175              |
| hsa-miR-4303    | 1.20E-05          | 3.34E-05          | 0.612      | 1.017              |
| hsa-miR-486-3p  | 1.23E-05          | 3.43E-05          | 0.522      | 0.971              |
| hsa-miR-1263    | 1.23E-05          | 3.43E-05          | 0.610      | 0.984              |
| hsa-miR-525-3p  | 1.27E-05          | 3.53E-05          | 0.579      | 0.978              |
| hsa-miR-369-3p  | 1.31E-05          | 3.63E-05          | 0.601      | 0.968              |
| hsa-miR-188-5p  | 1.33E-05          | 3.66E-05          | 0.609      | 4.726              |
| hsa-miR-423-3p  | 1.41E-05          | 3.87E-05          | 0.607      | 1.153              |
| hsa-miR-4259    | 1.52E-05          | 4.18E-05          | 0.693      | 1.087              |
| hsa-miR-3186-5p | 1.53E-05          | 4.20E-05          | 0.587      | 0.983              |
| hsa-miR-182-3p  | 1.55E-05          | 4.25E-05          | 0.600      | 0.980              |
| hsa-miR-335-3p  | 1.57E-05          | 4.27E-05          | 0.560      | 0.680              |
| hsa-miR-135b-5p | 1.67E-05          | 4.54E-05          | 0.592      | 0.936              |
| hsa-miR-4255    | 1.71E-05          | 4.63E-05          | 0.598      | 1.017              |
| hsa-miR-520f-3p | 1.73E-05          | 4.68E-05          | 0.597      | 0.960              |
| hsa-miR-302f    | 1.81E-05          | 4.89E-05          | 0.597      | 0.979              |
| hsa-miR-1278    | 1.82E-05          | 4.91E-05          | 0.581      | 0.973              |
| hsa-miR-193b-5p | 1.90E-05          | 5.11E-05          | 0.652      | 1.100              |
| hsa-miR-136-3p  | 1.97E-05          | 5.27E-05          | 0.594      | 0.978              |
| hsa-miR-545-3p  | 2.15E-05          | 5.76E-05          | 0.598      | 0.971              |
| hsa-miR-646     | 2.69E-05          | 7.19E-05          | 0.590      | 0.982              |
| hsa-miR-338-3p  | 2.71E-05          | 7.22E-05          | 0.587      | 0.796              |
| hsa-miR-515-5p  | 2.72E-05          | 7.23E-05          | 0.549      | 0.969              |
| hsa-miR-3937    | 3.02E-05          | 8.01E-05          | 0.680      | 2.615              |
| hsa-miR-1911-3p | 3.14E-05          | 8.30E-05          | 0.602      | 0.974              |
| hsa-miR-514b-5p | 3.36E-05          | 8.87E-05          | 0.722      | 2.670              |
| hsa-miR-519b-3p | 3.46E-05          | 9.12E-05          | 0.619      | 0.974              |
| hsa-miR-937-3p  | 3.49E-05          | 9.17E-05          | 0.624      | 0.842              |
| hsa-miR-30c-5p  | 3.52E-05          | 9.23E-05          | 0.597      | 1.319              |
| hsa-miR-889-3p  | 3.63E-05          | 9.49E-05          | 0.587      | 0.980              |
| hsa-miR-3167    | 3.90E-05          | 0.000102          | 0.583      | 0.980              |
| hsa-miR-140-3p  | 4.02E-05          | 0.000105          | 0.777      | 1.392              |
| hsa-let-7f-2-3p | 4.19E-05          | 0.000109          | 0.570      | 0.955              |
| hsa-miR-128-3p  | 4.41E-05          | 0.000114          | 0.650      | 1.244              |
| hsa-miR-337-5p  | 4.49E-05          | 0.000116          | 0.605      | 0.976              |
| hsa-miR-432-3p  | 4.73E-05          | 0.000122          | 0.570      | 0.972              |



| <b>miRNA</b>     | <b>ttest_rawp</b> | <b>ttest_adjp</b> | <b>AUC</b> | <b>fold_change</b> |
|------------------|-------------------|-------------------|------------|--------------------|
| hsa-miR-135b-3p  | 4.86E-05          | 0.000125          | 0.591      | 1.017              |
| hsa-miR-548n     | 4.90E-05          | 0.000126          | 0.560      | 0.965              |
| hsa-miR-631      | 4.94E-05          | 0.000127          | 0.569      | 1.383              |
| hsa-miR-1249-3p  | 5.06E-05          | 0.000130          | 0.576      | 3.448              |
| hsa-miR-3658     | 5.12E-05          | 0.000131          | 0.593      | 1.021              |
| hsa-miR-147b     | 5.67E-05          | 0.000145          | 0.599      | 0.982              |
| hsa-miR-508-3p   | 5.90E-05          | 0.000150          | 0.592      | 1.017              |
| hsa-miR-103b     | 6.17E-05          | 0.000157          | 0.595      | 1.046              |
| hsa-miR-770-5p   | 6.47E-05          | 0.000164          | 0.614      | 1.026              |
| hsa-miR-548f-3p  | 6.56E-05          | 0.000166          | 0.523      | 0.922              |
| hsa-miR-518d-3p  | 6.61E-05          | 0.000167          | 0.563      | 0.973              |
| hsa-miR-92b-5p   | 6.71E-05          | 0.000169          | 0.572      | 1.027              |
| hsa-miR-3129-5p  | 6.84E-05          | 0.000172          | 0.576      | 0.980              |
| hsa-miR-3683     | 6.91E-05          | 0.000173          | 0.564      | 0.985              |
| hsa-miR-3191-3p  | 6.92E-05          | 0.000173          | 0.592      | 1.014              |
| hsa-miR-545-5p   | 6.94E-05          | 0.000173          | 0.597      | 1.020              |
| hsa-miR-374b-3p  | 6.98E-05          | 0.000174          | 0.582      | 0.978              |
| hsa-miR-3689a-3p | 7.30E-05          | 0.000181          | 0.577      | 0.982              |
| hsa-miR-150-5p   | 7.45E-05          | 0.000185          | 0.686      | 1.576              |
| hsa-miR-624-3p   | 7.80E-05          | 0.000193          | 0.586      | 0.977              |
| hsa-miR-628-3p   | 8.04E-05          | 0.000199          | 0.594      | 0.897              |
| hsa-miR-518a-5p  | 8.53E-05          | 0.000210          | 0.577      | 1.025              |
| hsa-miR-3117-3p  | 9.17E-05          | 0.000226          | 0.553      | 0.969              |
| hsa-miR-185-3p   | 9.54E-05          | 0.000234          | 0.568      | 0.979              |
| hsa-miR-1273e    | 9.64E-05          | 0.000236          | 0.594      | 1.108              |
| hsa-miR-1264     | 9.66E-05          | 0.000236          | 0.564      | 0.966              |
| hsa-miR-498      | 0.000103          | 0.000251          | 0.628      | 1.142              |
| hsa-miR-3913-5p  | 0.000107          | 0.000261          | 0.568      | 0.986              |
| hsa-miR-650      | 0.000109          | 0.000264          | 0.571      | 1.157              |
| hsa-miR-3180     | 0.000109          | 0.000265          | 0.587      | 1.017              |
| hsa-miR-3924     | 0.000112          | 0.000271          | 0.571      | 0.956              |
| hsa-miR-4253     | 0.000112          | 0.000271          | 0.656      | 1.279              |
| hsa-miR-1469     | 0.000115          | 0.000277          | 0.615      | 1.098              |
| hsa-miR-500a-5p  | 0.000138          | 0.000331          | 0.595      | 1.230              |
| hsa-miR-1468-5p  | 0.000139          | 0.000333          | 0.593      | 0.985              |
| hsa-miR-93-3p    | 0.000140          | 0.000336          | 0.554      | 0.775              |
| hsa-miR-663a     | 0.000142          | 0.000340          | 0.646      | 2.845              |
| hsa-miR-1224-3p  | 0.000144          | 0.000343          | 0.598      | 0.969              |
| hsa-miR-1233-3p  | 0.000149          | 0.000355          | 0.578      | 1.039              |
| hsa-miR-4306     | 0.000153          | 0.000364          | 0.697      | 1.335              |
| hsa-miR-4271     | 0.000157          | 0.000372          | 0.629      | 2.649              |
| hsa-miR-3189-3p  | 0.000157          | 0.000373          | 0.588      | 1.026              |
| hsa-miR-190b     | 0.000167          | 0.000394          | 0.575      | 0.973              |
| hsa-miR-3610     | 0.000168          | 0.000397          | 0.707      | 1.989              |
| hsa-miR-3173-3p  | 0.000173          | 0.000408          | 0.593      | 1.019              |
| hsa-miR-708-3p   | 0.000175          | 0.000410          | 0.603      | 0.984              |

| <b>miRNA</b>     | <b>ttest_rawp</b> | <b>ttest_adjp</b> | <b>AUC</b> | <b>fold_change</b> |
|------------------|-------------------|-------------------|------------|--------------------|
| hsa-miR-1257     | 0.000181          | 0.000423          | 0.578      | 0.985              |
| hsa-miR-323a-5p  | 0.000181          | 0.000424          | 0.589      | 0.985              |
| hsa-miR-2114-3p  | 0.000189          | 0.000441          | 0.575      | 1.015              |
| hsa-miR-125a-3p  | 0.000197          | 0.000460          | 0.589      | 1.141              |
| hsa-miR-4270     | 0.000201          | 0.000467          | 0.650      | 34.107             |
| hsa-miR-767-5p   | 0.000205          | 0.000476          | 0.576      | 0.984              |
| hsa-miR-620      | 0.000216          | 0.000501          | 0.585      | 1.018              |
| hsa-miR-623      | 0.000219          | 0.000507          | 0.584      | 1.403              |
| hsa-miR-30b-3p   | 0.000222          | 0.000512          | 0.572      | 0.979              |
| hsa-miR-3190-5p  | 0.000228          | 0.000524          | 0.578      | 1.069              |
| hsa-miR-409-3p   | 0.000235          | 0.000541          | 0.585      | 1.378              |
| hsa-miR-4305     | 0.000241          | 0.000553          | 0.575      | 0.981              |
| hsa-miR-133a-3p  | 0.000242          | 0.000553          | 0.584      | 1.104              |
| hsa-miR-744-3p   | 0.000263          | 0.000601          | 0.566      | 0.947              |
| hsa-miR-3670     | 0.000268          | 0.000611          | 0.556      | 0.984              |
| hsa-miR-3134     | 0.000280          | 0.000637          | 0.586      | 1.016              |
| hsa-miR-601      | 0.000296          | 0.000671          | 0.658      | 1.356              |
| hsa-miR-551a     | 0.000315          | 0.000714          | 0.572      | 0.982              |
| hsa-miR-516a-3p  | 0.000332          | 0.000750          | 0.568      | 1.021              |
| hsa-miR-15a-3p   | 0.000332          | 0.000750          | 0.586      | 0.933              |
| hsa-miR-1205     | 0.000333          | 0.000750          | 0.575      | 0.987              |
| hsa-miR-133b     | 0.000334          | 0.000752          | 0.566      | 1.404              |
| hsa-miR-3682-3p  | 0.000348          | 0.000782          | 0.631      | 1.216              |
| hsa-miR-34b-5p   | 0.000357          | 0.000799          | 0.610      | 0.948              |
| hsa-miR-19b-1-5p | 0.000366          | 0.000819          | 0.599      | 0.969              |
| hsa-miR-1182     | 0.000375          | 0.000836          | 0.681      | 1.401              |
| hsa-miR-920      | 0.000390          | 0.000869          | 0.579      | 1.015              |
| hsa-miR-1236-3p  | 0.000393          | 0.000874          | 0.551      | 0.968              |
| hsa-miR-3648     | 0.000397          | 0.000882          | 0.693      | 13.541             |
| hsa-miR-662      | 0.000401          | 0.000888          | 0.580      | 1.037              |
| hsa-miR-875-5p   | 0.000402          | 0.000890          | 0.555      | 0.971              |
| hsa-miR-300      | 0.000426          | 0.000940          | 0.563      | 0.986              |
| hsa-miR-362-5p   | 0.000452          | 0.000996          | 0.644      | 1.234              |
| hsa-miR-3675-5p  | 0.000460          | 0.001011          | 0.574      | 0.986              |
| hsa-miR-1293     | 0.000495          | 0.001085          | 0.569      | 1.018              |
| hsa-miR-1178-3p  | 0.000501          | 0.001097          | 0.572      | 0.979              |
| hsa-miR-1225-5p  | 0.000502          | 0.001097          | 0.628      | 6.373              |
| hsa-miR-3911     | 0.000516          | 0.001126          | 0.675      | 5.136              |
| hsa-miR-4279     | 0.000517          | 0.001126          | 0.554      | 1.039              |
| hsa-miR-4260     | 0.000531          | 0.001155          | 0.556      | 1.025              |
| hsa-miR-138-1-3p | 0.000551          | 0.001197          | 0.583      | 1.022              |
| hsa-miR-4330     | 0.000573          | 0.001242          | 0.575      | 1.017              |
| hsa-miR-1246     | 0.000585          | 0.001266          | 0.602      | 1.283              |
| hsa-miR-583      | 0.000598          | 0.001291          | 0.637      | 1.047              |
| hsa-miR-3646     | 0.000612          | 0.001320          | 0.538      | 1.505              |
| hsa-miR-3132     | 0.000615          | 0.001321          | 0.624      | 1.016              |

| <b>miRNA</b>      | <b>ttest_rawp</b> | <b>ttest_adjp</b> | <b>AUC</b> | <b>fold_change</b> |
|-------------------|-------------------|-------------------|------------|--------------------|
| hsa-miR-339-3p    | 0.000616          | 0.001321          | 0.564      | 1.132              |
| hsa-miR-125b-1-3p | 0.000616          | 0.001321          | 0.554      | 0.961              |
| hsa-miR-1203      | 0.000654          | 0.001398          | 0.541      | 1.027              |
| hsa-miR-3614-5p   | 0.000661          | 0.001411          | 0.607      | 1.076              |
| hsa-miR-3939      | 0.000667          | 0.001421          | 0.572      | 1.017              |
| hsa-miR-890       | 0.000669          | 0.001422          | 0.579      | 1.014              |
| hsa-miR-3194-5p   | 0.000669          | 0.001422          | 0.671      | 2.674              |
| hsa-miR-675-3p    | 0.000714          | 0.001514          | 0.575      | 1.029              |
| hsa-miR-514a-3p   | 0.000739          | 0.001565          | 0.584      | 1.018              |
| hsa-miR-518a-3p   | 0.000742          | 0.001567          | 0.560      | 0.973              |
| hsa-miR-3942-5p   | 0.000762          | 0.001606          | 0.563      | 0.986              |
| hsa-miR-496       | 0.000794          | 0.001670          | 0.569      | 0.985              |
| hsa-miR-761       | 0.000804          | 0.001690          | 0.570      | 1.014              |
| hsa-miR-4329      | 0.000830          | 0.001741          | 0.554      | 0.981              |
| hsa-miR-132-3p    | 0.000877          | 0.001835          | 0.565      | 0.911              |
| hsa-miR-1913      | 0.000878          | 0.001835          | 0.551      | 1.041              |
| hsa-miR-100-3p    | 0.000903          | 0.001883          | 0.585      | 0.984              |
| hsa-miR-4296      | 0.000919          | 0.001915          | 0.544      | 1.039              |
| hsa-miR-30c-1-3p  | 0.000929          | 0.001931          | 0.582      | 1.040              |
| hsa-miR-548h-5p   | 0.000965          | 0.002002          | 0.564      | 0.985              |
| hsa-miR-1234-3p   | 0.000974          | 0.002017          | 0.548      | 1.454              |
| hsa-miR-497-3p    | 0.000996          | 0.002061          | 0.577      | 0.987              |
| hsa-miR-455-5p    | 0.001009          | 0.002083          | 0.598      | 0.984              |
| hsa-miR-196a-5p   | 0.001013          | 0.002089          | 0.637      | 0.965              |
| hsa-miR-216a-5p   | 0.001018          | 0.002095          | 0.568      | 1.014              |
| hsa-miR-493-3p    | 0.001024          | 0.002104          | 0.555      | 1.027              |
| hsa-miR-16-1-3p   | 0.001038          | 0.002128          | 0.597      | 1.029              |
| hsa-miR-3667-5p   | 0.001064          | 0.002179          | 0.566      | 2.105              |
| hsa-miR-3919      | 0.001068          | 0.002182          | 0.563      | 1.015              |
| hsa-miR-4264      | 0.001112          | 0.002268          | 0.572      | 0.984              |
| hsa-miR-604       | 0.001115          | 0.002270          | 0.561      | 1.020              |
| hsa-miR-4322      | 0.001137          | 0.002309          | 0.595      | 2.577              |
| hsa-miR-3907      | 0.001138          | 0.002309          | 0.529      | 0.741              |
| hsa-miR-520g-3p   | 0.001158          | 0.002346          | 0.587      | 0.958              |
| hsa-miR-1272      | 0.001165          | 0.002355          | 0.557      | 1.013              |
| hsa-miR-4287      | 0.001228          | 0.002480          | 0.557      | 0.989              |
| hsa-miR-378a-3p   | 0.001246          | 0.002510          | 0.604      | 1.140              |
| hsa-miR-513b-5p   | 0.001262          | 0.002539          | 0.551      | 0.884              |
| hsa-miR-4274      | 0.001265          | 0.002541          | 0.524      | 1.671              |
| hsa-miR-2277-3p   | 0.001287          | 0.002580          | 0.526      | 1.151              |
| hsa-miR-4304      | 0.001291          | 0.002584          | 0.603      | 1.201              |
| hsa-miR-3655      | 0.001298          | 0.002595          | 0.580      | 0.987              |
| hsa-miR-181a-2-3p | 0.001314          | 0.002621          | 0.594      | 1.080              |
| hsa-miR-548b-5p   | 0.001325          | 0.002639          | 0.568      | 0.967              |
| hsa-miR-3184-5p   | 0.001384          | 0.002752          | 0.570      | 0.988              |
| hsa-miR-3150b-3p  | 0.001399          | 0.002777          | 0.586      | 1.015              |

| <b>miRNA</b>     | <b>ttest_rawp</b> | <b>ttest_adjp</b> | <b>AUC</b> | <b>fold_change</b> |
|------------------|-------------------|-------------------|------------|--------------------|
| hsa-miR-4313     | 0.001447          | 0.002868          | 0.594      | 1.005              |
| hsa-miR-509-3-5p | 0.001457          | 0.002882          | 0.565      | 1.014              |
| hsa-miR-135a-3p  | 0.001488          | 0.002938          | 0.609      | 2.060              |
| hsa-miR-616-3p   | 0.001619          | 0.003191          | 0.573      | 1.015              |
| hsa-miR-3620-3p  | 0.001694          | 0.003334          | 0.536      | 1.229              |
| hsa-miR-4263     | 0.001725          | 0.003390          | 0.562      | 0.987              |
| hsa-miR-3925-5p  | 0.001810          | 0.003551          | 0.576      | 1.012              |
| hsa-miR-3201     | 0.001840          | 0.003603          | 0.575      | 1.016              |
| hsa-miR-4278     | 0.001849          | 0.003616          | 0.574      | 0.987              |
| hsa-miR-139-5p   | 0.001892          | 0.003694          | 0.576      | 1.075              |
| hsa-miR-34a-5p   | 0.001923          | 0.003748          | 0.607      | 0.908              |
| hsa-miR-4256     | 0.001949          | 0.003793          | 0.571      | 1.011              |
| hsa-miR-1303     | 0.002023          | 0.003929          | 0.535      | 1.031              |
| hsa-miR-31-5p    | 0.002135          | 0.004141          | 0.597      | 0.970              |
| hsa-miR-3617-5p  | 0.002171          | 0.004204          | 0.536      | 1.044              |
| hsa-miR-325      | 0.002190          | 0.004232          | 0.560      | 1.017              |
| hsa-miR-23b-3p   | 0.002214          | 0.004272          | 0.590      | 1.243              |
| hsa-miR-3622a-5p | 0.002236          | 0.004308          | 0.588      | 1.018              |
| hsa-miR-541-3p   | 0.002256          | 0.004340          | 0.571      | 1.014              |
| hsa-miR-18a-3p   | 0.002282          | 0.004382          | 0.548      | 1.147              |
| hsa-miR-636      | 0.002364          | 0.004533          | 0.573      | 1.051              |
| hsa-miR-600      | 0.002450          | 0.004690          | 0.587      | 0.988              |
| hsa-miR-148a-5p  | 0.002467          | 0.004716          | 0.562      | 1.027              |
| hsa-miR-548a-5p  | 0.002512          | 0.004793          | 0.553      | 0.978              |
| hsa-miR-129-1-3p | 0.002551          | 0.004859          | 0.593      | 1.017              |
| hsa-miR-143-5p   | 0.002597          | 0.004939          | 0.564      | 0.983              |
| hsa-miR-193a-3p  | 0.002611          | 0.004958          | 0.580      | 0.947              |
| hsa-miR-206      | 0.002669          | 0.005059          | 0.561      | 1.028              |
| hsa-miR-924      | 0.002722          | 0.005152          | 0.566      | 0.950              |
| hsa-miR-1294     | 0.002737          | 0.005173          | 0.539      | 0.969              |
| hsa-miR-525-5p   | 0.002890          | 0.005454          | 0.576      | 1.032              |
| hsa-miR-587      | 0.002949          | 0.005556          | 0.569      | 1.012              |
| hsa-miR-4277     | 0.003020          | 0.005679          | 0.564      | 0.988              |
| hsa-miR-1231     | 0.003082          | 0.005776          | 0.568      | 1.011              |
| hsa-miR-1180-3p  | 0.003085          | 0.005776          | 0.577      | 1.046              |
| hsa-miR-186-3p   | 0.003086          | 0.005776          | 0.557      | 0.979              |
| hsa-miR-1307-3p  | 0.003093          | 0.005781          | 0.601      | 1.002              |
| hsa-miR-553      | 0.003326          | 0.006206          | 0.575      | 0.982              |
| hsa-miR-4251     | 0.003391          | 0.006318          | 0.602      | 1.038              |
| hsa-miR-375      | 0.003469          | 0.006452          | 0.597      | 1.036              |
| hsa-miR-616-5p   | 0.003603          | 0.006691          | 0.537      | 1.023              |
| hsa-miR-331-5p   | 0.003678          | 0.006820          | 0.566      | 1.013              |
| hsa-miR-3678-3p  | 0.003687          | 0.006827          | 0.573      | 0.990              |
| hsa-miR-888-3p   | 0.003854          | 0.007123          | 0.570      | 0.988              |
| hsa-miR-146b-3p  | 0.003944          | 0.007280          | 0.568      | 0.985              |
| hsa-miR-671-5p   | 0.003969          | 0.007314          | 0.598      | 2.432              |

| <b>miRNA</b>     | <b>ttest_rawp</b> | <b>ttest_adjp</b> | <b>AUC</b> | <b>fold_change</b> |
|------------------|-------------------|-------------------|------------|--------------------|
| hsa-miR-508-5p   | 0.003983          | 0.007328          | 0.572      | 0.989              |
| hsa-miR-4300     | 0.004018          | 0.007380          | 0.560      | 0.989              |
| hsa-miR-1266-5p  | 0.004133          | 0.007580          | 0.547      | 1.013              |
| hsa-miR-602      | 0.004253          | 0.007789          | 0.570      | 1.063              |
| hsa-miR-155-5p   | 0.004447          | 0.008130          | 0.549      | 0.934              |
| hsa-miR-1915-5p  | 0.004543          | 0.008293          | 0.637      | 1.230              |
| hsa-miR-3175     | 0.004572          | 0.008334          | 0.556      | 1.010              |
| hsa-miR-425-5p   | 0.005005          | 0.009109          | 0.700      | 1.387              |
| hsa-miR-1254     | 0.005105          | 0.009276          | 0.608      | 1.011              |
| hsa-miR-585-3p   | 0.005213          | 0.009458          | 0.569      | 0.987              |
| hsa-miR-556-5p   | 0.005371          | 0.009729          | 0.556      | 1.018              |
| hsa-miR-127-3p   | 0.005392          | 0.009753          | 0.549      | 1.126              |
| hsa-miR-548j-5p  | 0.005501          | 0.009935          | 0.562      | 0.970              |
| hsa-miR-3149     | 0.005528          | 0.009969          | 0.598      | 1.053              |
| hsa-miR-877-5p   | 0.005807          | 0.010456          | 0.653      | 1.316              |
| hsa-miR-518b     | 0.005847          | 0.010512          | 0.580      | 1.031              |
| hsa-miR-3689b-3p | 0.005877          | 0.010550          | 0.557      | 0.980              |
| hsa-miR-644a     | 0.005941          | 0.010648          | 0.575      | 0.989              |
| hsa-miR-218-1-3p | 0.006056          | 0.010839          | 0.551      | 1.012              |
| hsa-miR-485-5p   | 0.006224          | 0.011122          | 0.561      | 1.013              |
| hsa-miR-2277-5p  | 0.006714          | 0.011979          | 0.557      | 1.012              |
| hsa-miR-1322     | 0.006785          | 0.012088          | 0.544      | 1.020              |
| hsa-miR-614      | 0.006819          | 0.012126          | 0.571      | 0.987              |
| hsa-miR-3921     | 0.006827          | 0.012126          | 0.546      | 0.979              |
| hsa-miR-4269     | 0.007005          | 0.012423          | 0.598      | 1.022              |
| hsa-miR-3202     | 0.007034          | 0.012446          | 0.648      | 2.058              |
| hsa-miR-1252-5p  | 0.007038          | 0.012446          | 0.553      | 1.016              |
| hsa-miR-1538     | 0.007084          | 0.012507          | 0.508      | 1.039              |
| hsa-miR-4285     | 0.007219          | 0.012719          | 0.559      | 1.011              |
| hsa-miR-3178     | 0.007225          | 0.012719          | 0.572      | 1.016              |
| hsa-let-7g-3p    | 0.007248          | 0.012740          | 0.577      | 0.981              |
| hsa-miR-3663-5p  | 0.007328          | 0.012863          | 0.546      | 1.020              |
| hsa-miR-218-2-3p | 0.007372          | 0.012920          | 0.536      | 0.987              |
| hsa-miR-200b-5p  | 0.007485          | 0.013098          | 0.561      | 1.019              |
| hsa-miR-3692-3p  | 0.007544          | 0.013183          | 0.557      | 1.008              |
| hsa-miR-3180-3p  | 0.007853          | 0.013703          | 0.573      | 1.094              |
| hsa-miR-3692-5p  | 0.008097          | 0.014108          | 0.586      | 1.012              |
| hsa-miR-550a-5p  | 0.008181          | 0.014232          | 0.580      | 1.026              |
| hsa-miR-340-5p   | 0.008226          | 0.014289          | 0.575      | 0.807              |
| hsa-miR-1251-5p  | 0.008508          | 0.014758          | 0.573      | 0.991              |
| hsa-miR-1323     | 0.008662          | 0.015003          | 0.577      | 1.030              |
| hsa-miR-382-5p   | 0.008758          | 0.015148          | 0.543      | 0.956              |
| hsa-miR-1245a    | 0.008892          | 0.015326          | 0.557      | 0.990              |
| hsa-miR-520e     | 0.008900          | 0.015326          | 0.589      | 0.974              |
| hsa-miR-543      | 0.008900          | 0.015326          | 0.552      | 1.137              |
| hsa-miR-488-5p   | 0.008945          | 0.015379          | 0.537      | 0.989              |

| <b>miRNA</b>    | <b>ttest_rawp</b> | <b>ttest_adjp</b> | <b>AUC</b> | <b>fold_change</b> |
|-----------------|-------------------|-------------------|------------|--------------------|
| hsa-miR-3145-3p | 0.008957          | 0.015379          | 0.551      | 0.988              |
| hsa-miR-2117    | 0.009019          | 0.015463          | 0.552      | 1.010              |
| hsa-miR-657     | 0.009119          | 0.015612          | 0.546      | 0.986              |
| hsa-miR-2115-5p | 0.009254          | 0.015820          | 0.560      | 1.040              |
| hsa-miR-630     | 0.009304          | 0.015883          | 0.664      | 4.375              |
| hsa-miR-4297    | 0.009377          | 0.015983          | 0.554      | 0.907              |
| hsa-miR-105-5p  | 0.009413          | 0.016023          | 0.540      | 0.990              |
| hsa-miR-649     | 0.009612          | 0.016338          | 0.550      | 1.014              |
| hsa-miR-1229-3p | 0.009727          | 0.016510          | 0.566      | 1.047              |
| hsa-miR-92a-3p  | 0.009867          | 0.016721          | 0.726      | 1.232              |
| hsa-miR-654-3p  | 0.009880          | 0.016721          | 0.562      | 0.912              |
| hsa-miR-3136-5p | 0.009909          | 0.016746          | 0.556      | 0.987              |
| hsa-miR-548d-5p | 0.010092          | 0.017032          | 0.547      | 1.448              |
| hsa-miR-3927-3p | 0.010185          | 0.017164          | 0.546      | 0.989              |
| hsa-miR-4299    | 0.010422          | 0.017537          | 0.594      | 1.261              |
| hsa-miR-490-5p  | 0.010461          | 0.017579          | 0.567      | 1.013              |
| hsa-miR-425-3p  | 0.010512          | 0.017605          | 0.577      | 1.003              |
| hsa-miR-519c-3p | 0.010512          | 0.017605          | 0.540      | 0.985              |
| hsa-miR-548aa   | 0.010521          | 0.017605          | 0.548      | 1.306              |
| hsa-miR-3690    | 0.010608          | 0.017725          | 0.561      | 1.018              |
| hsa-miR-299-3p  | 0.010749          | 0.017921          | 0.567      | 0.989              |
| hsa-miR-758-3p  | 0.010756          | 0.017921          | 0.574      | 0.956              |
| hsa-miR-3688-3p | 0.010791          | 0.017955          | 0.559      | 1.025              |
| hsa-miR-516b-5p | 0.010924          | 0.018150          | 0.566      | 1.017              |
| hsa-miR-32-3p   | 0.010993          | 0.018239          | 0.608      | 1.058              |
| hsa-miR-139-3p  | 0.011616          | 0.019225          | 0.568      | 1.047              |
| hsa-miR-490-3p  | 0.011620          | 0.019225          | 0.554      | 1.017              |
| hsa-miR-3671    | 0.011816          | 0.019496          | 0.543      | 0.987              |
| hsa-miR-1184    | 0.011827          | 0.019496          | 0.538      | 0.989              |
| hsa-miR-137     | 0.011833          | 0.019496          | 0.574      | 0.989              |
| hsa-miR-299-5p  | 0.012135          | 0.019967          | 0.556      | 0.894              |
| hsa-miR-371a-5p | 0.012243          | 0.020117          | 0.600      | 1.193              |
| hsa-miR-711     | 0.012498          | 0.020507          | 0.668      | 2.073              |
| hsa-miR-155-3p  | 0.012815          | 0.020997          | 0.532      | 0.984              |
| hsa-miR-3661    | 0.012870          | 0.021059          | 0.552      | 1.015              |
| hsa-miR-376a-5p | 0.012909          | 0.021094          | 0.570      | 0.955              |
| hsa-miR-302e    | 0.013070          | 0.021308          | 0.561      | 0.988              |
| hsa-miR-519d-3p | 0.013077          | 0.021308          | 0.561      | 0.970              |
| hsa-miR-3677-3p | 0.013276          | 0.021595          | 0.567      | 1.024              |
| hsa-miR-1193    | 0.013289          | 0.021595          | 0.556      | 1.010              |
| hsa-miR-1909-3p | 0.013332          | 0.021635          | 0.546      | 0.991              |
| hsa-miR-141-5p  | 0.013501          | 0.021878          | 0.557      | 0.991              |
| hsa-let-7b-5p   | 0.013750          | 0.022252          | 0.558      | 0.880              |
| hsa-miR-454-5p  | 0.013938          | 0.022526          | 0.556      | 0.930              |
| hsa-miR-2355-3p | 0.014080          | 0.022724          | 0.557      | 1.009              |
| hsa-miR-4288    | 0.014197          | 0.022882          | 0.552      | 1.012              |

| <b>miRNA</b>     | <b>ttest_rawp</b> | <b>ttest_adjp</b> | <b>AUC</b> | <b>fold_change</b> |
|------------------|-------------------|-------------------|------------|--------------------|
| hsa-miR-10a-3p   | 0.014421          | 0.023210          | 0.552      | 1.012              |
| hsa-miR-3714     | 0.014488          | 0.023287          | 0.523      | 1.024              |
| hsa-miR-548g-3p  | 0.015090          | 0.024212          | 0.547      | 0.979              |
| hsa-miR-323b-5p  | 0.015104          | 0.024212          | 0.552      | 1.011              |
| hsa-miR-3122     | 0.015247          | 0.024407          | 0.557      | 1.011              |
| hsa-miR-517c-3p  | 0.015363          | 0.024560          | 0.568      | 0.988              |
| hsa-miR-92a-2-5p | 0.015780          | 0.025193          | 0.567      | 0.987              |
| hsa-miR-210-3p   | 0.016083          | 0.025641          | 0.556      | 1.044              |
| hsa-miR-196b-3p  | 0.016157          | 0.025725          | 0.559      | 0.963              |
| hsa-miR-607      | 0.016337          | 0.025976          | 0.547      | 0.986              |
| hsa-miR-876-5p   | 0.016612          | 0.026378          | 0.507      | 0.984              |
| hsa-miR-581      | 0.016851          | 0.026721          | 0.559      | 0.990              |
| hsa-miR-4316     | 0.017053          | 0.027006          | 0.556      | 1.008              |
| hsa-miR-3941     | 0.017327          | 0.027404          | 0.554      | 0.990              |
| hsa-miR-195-3p   | 0.017460          | 0.027578          | 0.526      | 1.092              |
| hsa-miR-548w     | 0.017534          | 0.027658          | 0.605      | 0.980              |
| hsa-miR-659-3p   | 0.017868          | 0.028144          | 0.605      | 1.693              |
| hsa-miR-99b-3p   | 0.017891          | 0.028144          | 0.513      | 0.955              |
| hsa-miR-574-5p   | 0.018020          | 0.028310          | 0.529      | 2.427              |
| hsa-miR-181c-5p  | 0.018094          | 0.028389          | 0.555      | 1.030              |
| hsa-miR-31-3p    | 0.018363          | 0.028773          | 0.582      | 0.989              |
| hsa-miR-637      | 0.019338          | 0.030261          | 0.599      | 0.987              |
| hsa-miR-501-3p   | 0.021245          | 0.033200          | 0.598      | 1.133              |
| hsa-miR-3929     | 0.021560          | 0.033648          | 0.551      | 1.010              |
| hsa-miR-367-5p   | 0.021982          | 0.034262          | 0.540      | 0.988              |
| hsa-miR-3622a-3p | 0.022161          | 0.034496          | 0.601      | 0.982              |
| hsa-miR-1228-3p  | 0.022459          | 0.034913          | 0.542      | 1.403              |
| hsa-miR-3686     | 0.023854          | 0.037034          | 0.546      | 1.009              |
| hsa-miR-3180-5p  | 0.023892          | 0.037044          | 0.549      | 1.091              |
| hsa-miR-605-5p   | 0.023994          | 0.037153          | 0.560      | 0.904              |
| hsa-miR-1909-5p  | 0.024100          | 0.037269          | 0.510      | 1.139              |
| hsa-miR-3945     | 0.024282          | 0.037501          | 0.624      | 3.728              |
| hsa-miR-671-3p   | 0.024773          | 0.038210          | 0.576      | 1.020              |
| hsa-miR-936      | 0.025300          | 0.038972          | 0.576      | 1.026              |
| hsa-miR-219a-5p  | 0.025419          | 0.039104          | 0.546      | 0.979              |
| hsa-miR-3116     | 0.026061          | 0.040038          | 0.546      | 1.009              |
| hsa-miR-451a     | 0.026115          | 0.040070          | 0.544      | 0.952              |
| hsa-miR-3664-5p  | 0.026479          | 0.040576          | 0.549      | 0.991              |
| hsa-miR-612      | 0.026688          | 0.040844          | 0.550      | 0.991              |
| hsa-miR-1197     | 0.027045          | 0.041336          | 0.611      | 0.989              |
| hsa-miR-19b-2-5p | 0.027600          | 0.042130          | 0.522      | 0.985              |
| hsa-miR-941      | 0.027733          | 0.042278          | 0.539      | 1.008              |
| hsa-miR-1306-3p  | 0.028572          | 0.043501          | 0.575      | 1.023              |
| hsa-miR-3928-3p  | 0.028930          | 0.043990          | 0.543      | 0.993              |
| hsa-miR-34c-3p   | 0.029204          | 0.044349          | 0.552      | 1.010              |
| hsa-miR-517a-3p  | 0.029435          | 0.044642          | 0.572      | 0.979              |

| <b>miRNA</b>     | <b>ttest_rawp</b> | <b>ttest_adjp</b> | <b>AUC</b> | <b>fold_change</b> |
|------------------|-------------------|-------------------|------------|--------------------|
| hsa-miR-633      | 0.029472          | 0.044642          | 0.521      | 0.985              |
| hsa-miR-4266     | 0.029635          | 0.044831          | 0.556      | 0.993              |
| hsa-miR-549a     | 0.030425          | 0.045967          | 0.553      | 0.990              |
| hsa-miR-1258     | 0.030708          | 0.046336          | 0.552      | 0.991              |
| hsa-miR-518c-3p  | 0.030928          | 0.046609          | 0.565      | 0.986              |
| hsa-miR-376a-3p  | 0.031073          | 0.046767          | 0.543      | 0.926              |
| hsa-miR-149-3p   | 0.031138          | 0.046806          | 0.562      | 1.040              |
| hsa-miR-4301     | 0.031910          | 0.047906          | 0.565      | 0.989              |
| hsa-miR-124-3p   | 0.032046          | 0.048048          | 0.547      | 1.010              |
| hsa-miR-153-3p   | 0.032210          | 0.048234          | 0.546      | 1.010              |
| hsa-miR-580-3p   | 0.032408          | 0.048468          | 0.540      | 0.989              |
| hsa-miR-626      | 0.032959          | 0.049230          | 0.548      | 0.990              |
| hsa-miR-3607-5p  | 0.036367          | 0.054253          | 0.504      | 0.958              |
| hsa-miR-205-3p   | 0.037019          | 0.055155          | 0.516      | 1.020              |
| hsa-miR-20b-3p   | 0.037557          | 0.055887          | 0.540      | 0.993              |
| hsa-miR-3130-3p  | 0.037827          | 0.056218          | 0.547      | 1.009              |
| hsa-miR-718      | 0.039237          | 0.058240          | 0.656      | 3.163              |
| hsa-miR-3163     | 0.040513          | 0.060059          | 0.548      | 0.940              |
| hsa-miR-513c-5p  | 0.040841          | 0.060424          | 0.508      | 0.957              |
| hsa-miR-1237-3p  | 0.040862          | 0.060424          | 0.538      | 1.106              |
| hsa-miR-518f-3p  | 0.042469          | 0.062723          | 0.532      | 0.991              |
| hsa-miR-518f-5p  | 0.042540          | 0.062748          | 0.587      | 0.991              |
| hsa-miR-632      | 0.042639          | 0.062817          | 0.555      | 1.008              |
| hsa-miR-3128     | 0.042869          | 0.063077          | 0.572      | 0.989              |
| hsa-miR-302b-5p  | 0.043361          | 0.063722          | 0.560      | 0.990              |
| hsa-miR-372-3p   | 0.043619          | 0.064021          | 0.540      | 0.993              |
| hsa-miR-625-3p   | 0.043821          | 0.064238          | 0.558      | 1.038              |
| hsa-miR-608      | 0.044433          | 0.065055          | 0.549      | 0.993              |
| hsa-miR-3935     | 0.044623          | 0.065252          | 0.521      | 1.204              |
| hsa-miR-1269a    | 0.046107          | 0.067339          | 0.543      | 0.993              |
| hsa-miR-1539     | 0.046259          | 0.067477          | 0.543      | 1.021              |
| hsa-miR-208a-3p  | 0.047944          | 0.069849          | 0.545      | 1.008              |
| hsa-miR-599      | 0.049300          | 0.071736          | 0.534      | 0.992              |
| hsa-miR-3151-5p  | 0.049995          | 0.072659          | 0.527      | 1.012              |
| hsa-miR-491-5p   | 0.050383          | 0.073133          | 0.566      | 1.012              |
| hsa-miR-27b-5p   | 0.052810          | 0.076562          | 0.535      | 1.008              |
| hsa-miR-548q     | 0.053775          | 0.077866          | 0.568      | 0.989              |
| hsa-miR-223-3p   | 0.054238          | 0.078440          | 0.560      | 0.935              |
| hsa-miR-204-5p   | 0.054476          | 0.078687          | 0.518      | 11.171             |
| hsa-miR-661      | 0.055982          | 0.080765          | 0.544      | 0.993              |
| hsa-miR-33a-5p   | 0.057570          | 0.082953          | 0.539      | 0.991              |
| hsa-miR-2115-3p  | 0.057700          | 0.083040          | 0.529      | 0.991              |
| hsa-miR-1827     | 0.058511          | 0.084105          | 0.511      | 0.988              |
| hsa-miR-3622b-3p | 0.059189          | 0.084977          | 0.521      | 1.010              |
| hsa-miR-1911-5p  | 0.060346          | 0.086533          | 0.554      | 0.993              |
| hsa-miR-198      | 0.062017          | 0.088731          | 0.606      | 2.060              |



| <b>miRNA</b>      | <b>ttest_rawp</b> | <b>ttest_adjp</b> | <b>AUC</b> | <b>fold_change</b> |
|-------------------|-------------------|-------------------|------------|--------------------|
| hsa-miR-19b-3p    | 0.062029          | 0.088731          | 0.562      | 0.929              |
| hsa-miR-3187-3p   | 0.062890          | 0.089854          | 0.544      | 1.016              |
| hsa-miR-29a-3p    | 0.063091          | 0.090032          | 0.548      | 1.053              |
| hsa-miR-3672      | 0.064527          | 0.091971          | 0.527      | 0.991              |
| hsa-miR-571       | 0.064929          | 0.092432          | 0.601      | 1.025              |
| hsa-miR-3200-3p   | 0.065145          | 0.092628          | 0.549      | 0.936              |
| hsa-miR-30e-5p    | 0.065610          | 0.093177          | 0.549      | 0.940              |
| hsa-miR-516a-5p   | 0.066285          | 0.093983          | 0.543      | 1.012              |
| hsa-miR-3619-5p   | 0.066337          | 0.093983          | 0.545      | 1.006              |
| hsa-miR-2116-3p   | 0.066669          | 0.094342          | 0.549      | 1.020              |
| hsa-miR-33b-3p    | 0.067317          | 0.095131          | 0.536      | 1.035              |
| hsa-miR-187-5p    | 0.067388          | 0.095131          | 0.579      | 1.479              |
| hsa-miR-466       | 0.067575          | 0.095281          | 0.543      | 0.916              |
| hsa-miR-596       | 0.068791          | 0.096881          | 0.539      | 1.013              |
| hsa-miR-3165      | 0.069020          | 0.097087          | 0.546      | 0.992              |
| hsa-miR-597-5p    | 0.069809          | 0.098081          | 0.536      | 0.992              |
| hsa-miR-3909      | 0.073519          | 0.103170          | 0.534      | 1.010              |
| hsa-miR-1200      | 0.073856          | 0.103520          | 0.532      | 0.993              |
| hsa-miR-621       | 0.075597          | 0.105836          | 0.532      | 0.994              |
| hsa-miR-212-3p    | 0.076584          | 0.107090          | 0.506      | 0.868              |
| hsa-miR-568       | 0.077241          | 0.107882          | 0.544      | 1.007              |
| hsa-miR-518e-5p   | 0.077423          | 0.107932          | 0.544      | 1.024              |
| hsa-miR-125b-2-3p | 0.077460          | 0.107932          | 0.535      | 1.010              |
| hsa-miR-1261      | 0.077860          | 0.108363          | 0.526      | 0.993              |
| hsa-miR-526b-5p   | 0.078310          | 0.108861          | 0.571      | 1.168              |
| hsa-miR-127-5p    | 0.079971          | 0.111040          | 0.538      | 0.993              |
| hsa-miR-3197      | 0.081473          | 0.112992          | 0.523      | 0.990              |
| hsa-miR-1297      | 0.083071          | 0.115074          | 0.531      | 1.011              |
| hsa-miR-2116-5p   | 0.086309          | 0.119419          | 0.549      | 0.993              |
| hsa-miR-3148      | 0.086453          | 0.119479          | 0.605      | 1.026              |
| hsa-miR-3150a-3p  | 0.087316          | 0.120531          | 0.543      | 1.007              |
| hsa-miR-449c-5p   | 0.088896          | 0.122569          | 0.561      | 0.992              |
| hsa-miR-1296-5p   | 0.090677          | 0.124879          | 0.512      | 0.967              |
| hsa-miR-1271-5p   | 0.090839          | 0.124957          | 0.541      | 1.055              |
| hsa-miR-193b-3p   | 0.091006          | 0.125041          | 0.550      | 1.035              |
| hsa-miR-3681-5p   | 0.092803          | 0.127362          | 0.548      | 0.993              |
| hsa-miR-25-5p     | 0.094047          | 0.128919          | 0.541      | 0.991              |
| hsa-miR-3143      | 0.094158          | 0.128922          | 0.535      | 0.993              |
| hsa-miR-1267      | 0.097480          | 0.133317          | 0.568      | 0.994              |
| hsa-miR-188-3p    | 0.099119          | 0.135402          | 0.538      | 0.986              |
| hsa-miR-642a-5p   | 0.099577          | 0.135870          | 0.530      | 0.990              |
| hsa-miR-520a-5p   | 0.100008          | 0.136302          | 0.534      | 1.011              |
| hsa-miR-648       | 0.101729          | 0.138487          | 0.532      | 1.011              |
| hsa-miR-876-3p    | 0.102216          | 0.138990          | 0.523      | 0.990              |
| hsa-miR-383-5p    | 0.103458          | 0.140517          | 0.523      | 0.991              |
| hsa-miR-3065-3p   | 0.111598          | 0.151400          | 0.524      | 0.995              |

| <b>miRNA</b>    | <b>ttest_rawp</b> | <b>ttest_adjp</b> | <b>AUC</b> | <b>fold_change</b> |
|-----------------|-------------------|-------------------|------------|--------------------|
| hsa-miR-548l    | 0.113815          | 0.154230          | 0.544      | 0.994              |
| hsa-miR-3118    | 0.114113          | 0.154457          | 0.517      | 0.993              |
| hsa-miR-2052    | 0.114487          | 0.154786          | 0.536      | 1.007              |
| hsa-miR-3181    | 0.117416          | 0.158566          | 0.534      | 1.021              |
| hsa-miR-891b    | 0.118300          | 0.159577          | 0.537      | 0.992              |
| hsa-miR-509-3p  | 0.118644          | 0.159858          | 0.549      | 1.006              |
| hsa-miR-593-5p  | 0.119655          | 0.161037          | 0.529      | 0.994              |
| hsa-miR-1255a   | 0.120933          | 0.162572          | 0.541      | 1.010              |
| hsa-miR-200c-3p | 0.122713          | 0.164778          | 0.525      | 1.319              |
| hsa-miR-663b    | 0.123495          | 0.165641          | 0.527      | 1.009              |
| hsa-miR-520b    | 0.125248          | 0.167801          | 0.597      | 0.993              |
| hsa-miR-432-5p  | 0.126718          | 0.169578          | 0.520      | 0.972              |
| hsa-miR-1470    | 0.127784          | 0.170812          | 0.536      | 1.011              |
| hsa-miR-518e-3p | 0.130183          | 0.173823          | 0.544      | 0.993              |
| hsa-miR-769-5p  | 0.130343          | 0.173839          | 0.524      | 1.092              |
| hsa-miR-512-5p  | 0.130594          | 0.173978          | 0.535      | 0.993              |
| hsa-miR-4268    | 0.132135          | 0.175833          | 0.534      | 0.995              |
| hsa-miR-3685    | 0.134734          | 0.179090          | 0.563      | 1.005              |
| hsa-miR-638     | 0.137063          | 0.181981          | 0.506      | 1.211              |
| hsa-miR-939-5p  | 0.137408          | 0.182236          | 0.509      | 0.919              |
| hsa-miR-33a-3p  | 0.137876          | 0.182651          | 0.537      | 1.011              |
| hsa-miR-4310    | 0.140186          | 0.185504          | 0.542      | 0.991              |
| hsa-miR-218-5p  | 0.141931          | 0.187602          | 0.620      | 0.904              |
| hsa-miR-603     | 0.143976          | 0.190093          | 0.523      | 0.993              |
| hsa-miR-3131    | 0.147922          | 0.195086          | 0.590      | 1.906              |
| hsa-miR-2909    | 0.148171          | 0.195196          | 0.538      | 0.993              |
| hsa-miR-506-3p  | 0.149379          | 0.196569          | 0.538      | 1.005              |
| hsa-miR-563     | 0.150640          | 0.198007          | 0.546      | 0.982              |
| hsa-miR-340-3p  | 0.152493          | 0.200147          | 0.529      | 1.020              |
| hsa-miR-1262    | 0.152606          | 0.200147          | 0.534      | 1.007              |
| hsa-miR-4276    | 0.154285          | 0.202126          | 0.533      | 0.995              |
| hsa-miR-29c-3p  | 0.155097          | 0.202965          | 0.554      | 0.851              |
| hsa-miR-592     | 0.155441          | 0.203189          | 0.542      | 0.993              |
| hsa-miR-3616-5p | 0.155842          | 0.203489          | 0.518      | 1.008              |
| hsa-miR-1206    | 0.157077          | 0.204876          | 0.530      | 0.994              |
| hsa-miR-222-5p  | 0.158039          | 0.205903          | 0.532      | 0.995              |
| hsa-miR-1914-5p | 0.158789          | 0.206652          | 0.535      | 0.991              |
| hsa-miR-676-3p  | 0.161506          | 0.209957          | 0.533      | 0.995              |
| hsa-miR-4292    | 0.163360          | 0.212135          | 0.536      | 0.994              |
| hsa-miR-514b-3p | 0.163894          | 0.212595          | 0.538      | 0.995              |
| hsa-miR-517-5p  | 0.164402          | 0.213021          | 0.536      | 0.995              |
| hsa-miR-192-5p  | 0.167325          | 0.216570          | 0.552      | 0.932              |
| hsa-miR-1912    | 0.168327          | 0.217629          | 0.530      | 1.005              |
| hsa-miR-593-3p  | 0.170331          | 0.219980          | 0.545      | 0.993              |
| hsa-miR-3146    | 0.176238          | 0.227361          | 0.537      | 1.005              |
| hsa-miR-323b-3p | 0.178793          | 0.230405          | 0.521      | 1.005              |

| <b>miRNA</b>     | <b>ttest_rawp</b> | <b>ttest_adjp</b> | <b>AUC</b> | <b>fold_change</b> |
|------------------|-------------------|-------------------|------------|--------------------|
| hsa-miR-492      | 0.183314          | 0.235974          | 0.526      | 0.995              |
| hsa-miR-885-5p   | 0.188002          | 0.241651          | 0.514      | 0.503              |
| hsa-miR-548s     | 0.188132          | 0.241651          | 0.536      | 1.006              |
| hsa-miR-302c-5p  | 0.193152          | 0.247647          | 0.510      | 1.023              |
| hsa-miR-3162-5p  | 0.193219          | 0.247647          | 0.521      | 1.703              |
| hsa-miR-138-2-3p | 0.195521          | 0.250326          | 0.545      | 1.012              |
| hsa-miR-767-3p   | 0.196439          | 0.251229          | 0.517      | 0.967              |
| hsa-miR-296-3p   | 0.197024          | 0.251706          | 0.526      | 1.005              |
| hsa-miR-635      | 0.197591          | 0.252158          | 0.523      | 1.007              |
| hsa-miR-1243     | 0.198454          | 0.252986          | 0.531      | 0.993              |
| hsa-miR-618      | 0.200158          | 0.254883          | 0.517      | 0.992              |
| hsa-miR-26b-3p   | 0.202399          | 0.257461          | 0.517      | 0.976              |
| hsa-miR-802      | 0.203939          | 0.259140          | 0.523      | 0.994              |
| hsa-miR-1304-5p  | 0.204297          | 0.259317          | 0.543      | 0.991              |
| hsa-miR-34c-5p   | 0.204866          | 0.259760          | 0.517      | 0.995              |
| hsa-miR-3200-5p  | 0.205409          | 0.260170          | 0.519      | 0.967              |
| hsa-miR-412-3p   | 0.211931          | 0.268144          | 0.525      | 0.995              |
| hsa-miR-483-3p   | 0.214280          | 0.270826          | 0.507      | 0.807              |
| hsa-miR-548u     | 0.214517          | 0.270836          | 0.524      | 0.992              |
| hsa-miR-129-5p   | 0.216396          | 0.272918          | 0.518      | 0.995              |
| hsa-miR-302d-5p  | 0.219459          | 0.276486          | 0.524      | 0.996              |
| hsa-miR-10b-5p   | 0.225521          | 0.283821          | 0.510      | 10.324             |
| hsa-miR-3675-3p  | 0.233341          | 0.293350          | 0.522      | 0.958              |
| hsa-miR-1227-3p  | 0.238845          | 0.299951          | 0.552      | 0.987              |
| hsa-miR-3119     | 0.240449          | 0.301645          | 0.526      | 0.995              |
| hsa-miR-888-5p   | 0.241431          | 0.302556          | 0.531      | 1.004              |
| hsa-miR-651-5p   | 0.244333          | 0.305868          | 0.521      | 0.995              |
| hsa-miR-3144-5p  | 0.251985          | 0.315114          | 0.523      | 0.995              |
| hsa-miR-4302     | 0.253035          | 0.316094          | 0.540      | 0.996              |
| hsa-miR-507      | 0.254500          | 0.317588          | 0.521      | 0.996              |
| hsa-miR-554      | 0.257538          | 0.321040          | 0.544      | 0.995              |
| hsa-miR-409-5p   | 0.260161          | 0.323948          | 0.537      | 0.985              |
| hsa-miR-3157-5p  | 0.260418          | 0.323948          | 0.522      | 1.011              |
| hsa-miR-3182     | 0.261083          | 0.324434          | 0.531      | 1.004              |
| hsa-miR-922      | 0.262938          | 0.326396          | 0.524      | 1.005              |
| hsa-miR-130b-3p  | 0.264833          | 0.328404          | 0.513      | 0.996              |
| hsa-miR-645      | 0.276574          | 0.342605          | 0.529      | 1.004              |
| hsa-miR-3691-5p  | 0.277367          | 0.343227          | 0.518      | 0.996              |
| hsa-miR-769-3p   | 0.277702          | 0.343283          | 0.523      | 0.992              |
| hsa-miR-30a-3p   | 0.278963          | 0.344481          | 0.514      | 2.995              |
| hsa-miR-146a-5p  | 0.279961          | 0.345353          | 0.509      | 0.993              |
| hsa-miR-589-5p   | 0.282089          | 0.347616          | 0.517      | 1.004              |
| hsa-miR-181a-3p  | 0.282482          | 0.347738          | 0.536      | 0.993              |
| hsa-miR-933      | 0.284740          | 0.350154          | 0.531      | 1.023              |
| hsa-miR-345-5p   | 0.285858          | 0.351163          | 0.511      | 1.013              |
| hsa-miR-92a-1-5p | 0.290960          | 0.357010          | 0.511      | 1.006              |

| <b>miRNA</b>     | <b>ttest_rawp</b> | <b>ttest_adjp</b> | <b>AUC</b> | <b>fold_change</b> |
|------------------|-------------------|-------------------|------------|--------------------|
| hsa-miR-489-3p   | 0.291221          | 0.357010          | 0.551      | 0.996              |
| hsa-miR-518c-5p  | 0.291844          | 0.357403          | 0.506      | 1.020              |
| hsa-miR-891a-5p  | 0.292916          | 0.358345          | 0.520      | 1.005              |
| hsa-miR-4309     | 0.294686          | 0.360138          | 0.528      | 0.996              |
| hsa-miR-3679-3p  | 0.298504          | 0.364428          | 0.530      | 1.092              |
| hsa-miR-18b-3p   | 0.300343          | 0.366295          | 0.514      | 1.131              |
| hsa-miR-151a-5p  | 0.302078          | 0.368031          | 0.595      | 1.098              |
| hsa-miR-338-5p   | 0.302469          | 0.368129          | 0.523      | 0.997              |
| hsa-miR-187-3p   | 0.307284          | 0.373605          | 0.521      | 1.005              |
| hsa-miR-629-5p   | 0.310343          | 0.376936          | 0.575      | 1.118              |
| hsa-miR-124-5p   | 0.310778          | 0.377077          | 0.527      | 0.996              |
| hsa-miR-934      | 0.312115          | 0.378311          | 0.530      | 1.004              |
| hsa-miR-381-3p   | 0.313056          | 0.379064          | 0.556      | 0.993              |
| hsa-miR-105-3p   | 0.314256          | 0.380128          | 0.520      | 1.005              |
| hsa-miR-505-5p   | 0.315913          | 0.381742          | 0.553      | 1.177              |
| hsa-miR-513a-3p  | 0.319050          | 0.385139          | 0.537      | 0.996              |
| hsa-miR-297      | 0.321063          | 0.387174          | 0.535      | 0.995              |
| hsa-miR-641      | 0.322992          | 0.389103          | 0.504      | 0.979              |
| hsa-miR-3192-5p  | 0.323359          | 0.389150          | 0.512      | 0.996              |
| hsa-miR-4294     | 0.325811          | 0.391701          | 0.509      | 0.994              |
| hsa-miR-4317     | 0.332084          | 0.398837          | 0.521      | 1.039              |
| hsa-miR-323a-3p  | 0.333951          | 0.400673          | 0.513      | 1.042              |
| hsa-miR-448      | 0.336837          | 0.403726          | 0.529      | 1.005              |
| hsa-miR-552-3p   | 0.337836          | 0.404514          | 0.538      | 1.003              |
| hsa-miR-3665     | 0.339541          | 0.406145          | 0.503      | 1.247              |
| hsa-miR-3199     | 0.340496          | 0.406876          | 0.522      | 1.004              |
| hsa-miR-363-5p   | 0.344129          | 0.410801          | 0.520      | 1.012              |
| hsa-miR-30c-2-3p | 0.345168          | 0.411626          | 0.521      | 1.037              |
| hsa-miR-3612     | 0.348724          | 0.415448          | 0.522      | 0.996              |
| hsa-miR-590-3p   | 0.349663          | 0.416148          | 0.524      | 0.995              |
| hsa-miR-562      | 0.350337          | 0.416531          | 0.516      | 0.995              |
| hsa-miR-3666     | 0.351830          | 0.417886          | 0.527      | 1.003              |
| hsa-miR-3915     | 0.352256          | 0.417973          | 0.523      | 1.005              |
| hsa-miR-3120-3p  | 0.353071          | 0.418520          | 0.528      | 1.009              |
| hsa-miR-1825     | 0.357613          | 0.423426          | 0.523      | 0.949              |
| hsa-miR-4272     | 0.357926          | 0.423426          | 0.529      | 1.005              |
| hsa-miR-486-5p   | 0.359756          | 0.425167          | 0.541      | 1.037              |
| hsa-miR-4261     | 0.362131          | 0.427546          | 0.509      | 0.941              |
| hsa-miR-3651     | 0.364708          | 0.430159          | 0.545      | 1.077              |
| hsa-miR-3912-3p  | 0.366682          | 0.432056          | 0.538      | 0.996              |
| hsa-miR-1287-5p  | 0.367523          | 0.432617          | 0.509      | 1.250              |
| hsa-let-7c-5p    | 0.370698          | 0.435920          | 0.525      | 0.956              |
| hsa-miR-24-1-5p  | 0.371980          | 0.436993          | 0.512      | 0.995              |
| hsa-miR-938      | 0.373180          | 0.437968          | 0.542      | 1.003              |
| hsa-miR-30b-5p   | 0.373986          | 0.438479          | 0.520      | 1.112              |
| hsa-miR-619-3p   | 0.374960          | 0.439186          | 0.514      | 1.004              |

| <b>miRNA</b>      | <b>ttest_rawp</b> | <b>ttest_adjp</b> | <b>AUC</b> | <b>fold_change</b> |
|-------------------|-------------------|-------------------|------------|--------------------|
| hsa-miR-3713      | 0.378268          | 0.442622          | 0.510      | 1.221              |
| hsa-miR-3153      | 0.379073          | 0.443126          | 0.505      | 1.003              |
| hsa-miR-191-5p    | 0.380745          | 0.444641          | 0.544      | 0.981              |
| hsa-miR-3938      | 0.384380          | 0.448089          | 0.520      | 1.375              |
| hsa-miR-1253      | 0.384749          | 0.448089          | 0.517      | 1.004              |
| hsa-miR-138-5p    | 0.385007          | 0.448089          | 0.506      | 0.996              |
| hsa-miR-194-5p    | 0.385213          | 0.448089          | 0.513      | 1.110              |
| hsa-miR-122-5p    | 0.388869          | 0.451898          | 0.503      | 0.974              |
| hsa-miR-544a      | 0.391513          | 0.454524          | 0.537      | 1.015              |
| hsa-miR-330-5p    | 0.392345          | 0.455043          | 0.517      | 1.006              |
| hsa-miR-3944-3p   | 0.393143          | 0.455522          | 0.531      | 0.997              |
| hsa-let-7e-5p     | 0.399837          | 0.462825          | 0.539      | 2.147              |
| hsa-miR-1250-5p   | 0.401052          | 0.463778          | 0.514      | 0.997              |
| hsa-miR-3158-3p   | 0.403242          | 0.465855          | 0.521      | 1.004              |
| hsa-miR-194-3p    | 0.407856          | 0.470725          | 0.509      | 0.996              |
| hsa-miR-3674      | 0.408746          | 0.471292          | 0.515      | 0.997              |
| hsa-miR-588       | 0.409296          | 0.471467          | 0.526      | 0.996              |
| hsa-miR-3650      | 0.410311          | 0.472177          | 0.527      | 0.998              |
| hsa-miR-544b      | 0.419549          | 0.481919          | 0.512      | 0.997              |
| hsa-miR-1238-3p   | 0.419592          | 0.481919          | 0.517      | 0.988              |
| hsa-miR-3185      | 0.420119          | 0.482057          | 0.501      | 1.006              |
| hsa-miR-380-5p    | 0.425146          | 0.487352          | 0.513      | 1.004              |
| hsa-miR-23b-5p    | 0.426651          | 0.488605          | 0.530      | 0.996              |
| hsa-miR-203a-3p   | 0.429735          | 0.491302          | 0.523      | 1.043              |
| hsa-miR-371a-3p   | 0.429837          | 0.491302          | 0.549      | 1.008              |
| hsa-miR-103a-2-5p | 0.432538          | 0.493912          | 0.529      | 0.981              |
| hsa-miR-149-5p    | 0.434473          | 0.495643          | 0.533      | 0.970              |
| hsa-miR-4283      | 0.436313          | 0.497262          | 0.507      | 1.005              |
| hsa-miR-670-5p    | 0.440103          | 0.501100          | 0.515      | 0.988              |
| hsa-miR-25-3p     | 0.441874          | 0.502632          | 0.689      | 1.151              |
| hsa-miR-3689a-5p  | 0.443864          | 0.504410          | 0.510      | 0.997              |
| hsa-miR-639       | 0.444556          | 0.504712          | 0.509      | 1.007              |
| hsa-miR-1277-3p   | 0.446557          | 0.506498          | 0.525      | 0.992              |
| hsa-miR-142-5p    | 0.450116          | 0.510045          | 0.543      | 0.906              |
| hsa-miR-3606-5p   | 0.458078          | 0.518570          | 0.515      | 1.010              |
| hsa-miR-3662      | 0.462323          | 0.522875          | 0.518      | 1.003              |
| hsa-miR-3668      | 0.464365          | 0.524191          | 0.513      | 1.004              |
| hsa-miR-23c       | 0.464372          | 0.524191          | 0.528      | 0.961              |
| hsa-miR-134-5p    | 0.466279          | 0.525348          | 0.555      | 5.271              |
| hsa-miR-943       | 0.466286          | 0.525348          | 0.520      | 1.008              |
| hsa-miR-10a-5p    | 0.467118          | 0.525786          | 0.508      | 2.050              |
| hsa-miR-4258      | 0.469484          | 0.527947          | 0.522      | 1.007              |
| hsa-miR-606       | 0.470387          | 0.528459          | 0.510      | 1.004              |
| hsa-miR-3649      | 0.473240          | 0.531160          | 0.530      | 0.998              |
| hsa-miR-154-5p    | 0.476325          | 0.534116          | 0.542      | 1.002              |
| hsa-miR-944       | 0.482741          | 0.540798          | 0.502      | 0.997              |

| <b>miRNA</b>    | <b>ttest_rawp</b> | <b>ttest_adjp</b> | <b>AUC</b> | <b>fold_change</b> |
|-----------------|-------------------|-------------------|------------|--------------------|
| hsa-miR-595     | 0.483873          | 0.541553          | 0.575      | 0.975              |
| hsa-miR-935     | 0.490678          | 0.548651          | 0.502      | 1.003              |
| hsa-miR-1302    | 0.491777          | 0.549360          | 0.526      | 1.004              |
| hsa-miR-2114-5p | 0.494609          | 0.551810          | 0.507      | 0.998              |
| hsa-miR-33b-5p  | 0.494903          | 0.551810          | 0.511      | 0.996              |
| hsa-miR-510-5p  | 0.499590          | 0.556511          | 0.511      | 0.998              |
| hsa-miR-10b-3p  | 0.503590          | 0.560439          | 0.517      | 0.990              |
| hsa-miR-4265    | 0.506337          | 0.562967          | 0.519      | 1.005              |
| hsa-miR-3176    | 0.510444          | 0.567000          | 0.521      | 0.994              |
| hsa-miR-3923    | 0.520860          | 0.578028          | 0.531      | 1.003              |
| hsa-miR-3618    | 0.525068          | 0.582151          | 0.506      | 0.997              |
| hsa-miR-200a-3p | 0.526694          | 0.583399          | 0.659      | 1.741              |
| hsa-miR-1-3p    | 0.527180          | 0.583399          | 0.524      | 1.003              |
| hsa-miR-183-3p  | 0.530903          | 0.586970          | 0.508      | 1.144              |
| hsa-miR-4312    | 0.531721          | 0.587326          | 0.536      | 0.916              |
| hsa-miR-3168    | 0.532674          | 0.587830          | 0.522      | 0.998              |
| hsa-miR-503-5p  | 0.533570          | 0.588269          | 0.519      | 1.007              |
| hsa-miR-577     | 0.537362          | 0.591899          | 0.529      | 1.003              |
| hsa-miR-3139    | 0.545342          | 0.600130          | 0.520      | 0.998              |
| hsa-miR-2113    | 0.547988          | 0.602481          | 0.509      | 1.000              |
| hsa-miR-146a-3p | 0.549354          | 0.603422          | 0.519      | 0.996              |
| hsa-let-7b-3p   | 0.551213          | 0.604902          | 0.520      | 0.860              |
| hsa-miR-1292-5p | 0.552461          | 0.605711          | 0.518      | 1.002              |
| hsa-miR-541-5p  | 0.555008          | 0.607939          | 0.518      | 0.997              |
| hsa-miR-676-5p  | 0.560172          | 0.613028          | 0.511      | 0.998              |
| hsa-miR-2861    | 0.561216          | 0.613527          | 0.506      | 0.998              |
| hsa-miR-191-3p  | 0.561665          | 0.613527          | 0.516      | 0.950              |
| hsa-miR-3680-5p | 0.567945          | 0.619114          | 0.504      | 0.998              |
| hsa-miR-610     | 0.568295          | 0.619114          | 0.516      | 0.984              |
| hsa-miR-3169    | 0.568350          | 0.619114          | 0.501      | 1.003              |
| hsa-miR-95-3p   | 0.575671          | 0.626513          | 0.542      | 1.096              |
| hsa-miR-511-5p  | 0.584634          | 0.635682          | 0.521      | 0.998              |
| hsa-miR-668-3p  | 0.585543          | 0.636085          | 0.508      | 1.004              |
| hsa-miR-200c-5p | 0.591992          | 0.642501          | 0.504      | 1.004              |
| hsa-miR-3659    | 0.600826          | 0.651491          | 0.518      | 1.019              |
| hsa-miR-4324    | 0.603502          | 0.653794          | 0.534      | 0.978              |
| hsa-miR-708-5p  | 0.605628          | 0.655253          | 0.509      | 0.998              |
| hsa-miR-200b-3p | 0.605957          | 0.655253          | 0.694      | 3.546              |
| hsa-miR-431-3p  | 0.612938          | 0.662197          | 0.503      | 0.998              |
| hsa-miR-377-5p  | 0.618638          | 0.667746          | 0.524      | 0.998              |
| hsa-miR-885-3p  | 0.631664          | 0.681183          | 0.506      | 0.998              |
| hsa-miR-542-5p  | 0.635501          | 0.684697          | 0.513      | 1.019              |
| hsa-miR-1298-5p | 0.637411          | 0.686130          | 0.515      | 1.002              |
| hsa-miR-3133    | 0.646607          | 0.695396          | 0.503      | 0.988              |
| hsa-miR-887-3p  | 0.653014          | 0.700979          | 0.500      | 1.030              |
| hsa-miR-100-5p  | 0.653441          | 0.700979          | 0.501      | 1.185              |

| <b>miRNA</b>      | <b>ttest_rawp</b> | <b>ttest_adjp</b> | <b>AUC</b> | <b>fold_change</b> |
|-------------------|-------------------|-------------------|------------|--------------------|
| hsa-miR-499a-3p   | 0.653576          | 0.700979          | 0.518      | 0.998              |
| hsa-miR-2278      | 0.655371          | 0.702268          | 0.577      | 1.023              |
| hsa-miR-567       | 0.659624          | 0.706186          | 0.512      | 1.002              |
| hsa-miR-373-3p    | 0.661484          | 0.707536          | 0.506      | 0.994              |
| hsa-miR-759       | 0.669854          | 0.715842          | 0.509      | 1.002              |
| hsa-miR-219a-1-3p | 0.670637          | 0.716033          | 0.512      | 0.999              |
| hsa-miR-3656      | 0.672207          | 0.717061          | 0.518      | 1.156              |
| hsa-miR-3142      | 0.673025          | 0.717286          | 0.517      | 0.998              |
| hsa-miR-429       | 0.675929          | 0.719733          | 0.610      | 1.165              |
| hsa-miR-555       | 0.677296          | 0.720418          | 0.512      | 1.002              |
| hsa-miR-224-3p    | 0.678151          | 0.720418          | 0.517      | 0.999              |
| hsa-miR-1273a     | 0.678399          | 0.720418          | 0.515      | 0.999              |
| hsa-miR-215-5p    | 0.701452          | 0.744231          | 0.525      | 0.981              |
| hsa-miR-3160-3p   | 0.707707          | 0.750194          | 0.514      | 0.999              |
| hsa-miR-376b-3p   | 0.710791          | 0.752789          | 0.507      | 1.003              |
| hsa-miR-3126-3p   | 0.719924          | 0.761780          | 0.507      | 1.002              |
| hsa-miR-611       | 0.730221          | 0.771985          | 0.500      | 0.998              |
| hsa-miR-431-5p    | 0.731146          | 0.772272          | 0.506      | 0.994              |
| hsa-miR-1226-3p   | 0.733959          | 0.774553          | 0.511      | 1.002              |
| hsa-miR-557       | 0.741719          | 0.782044          | 0.530      | 3.316              |
| hsa-miR-1910-5p   | 0.743578          | 0.782661          | 0.572      | 0.941              |
| hsa-miR-384       | 0.743627          | 0.782661          | 0.505      | 1.002              |
| hsa-miR-3159      | 0.744726          | 0.783121          | 0.500      | 0.999              |
| hsa-miR-142-3p    | 0.749480          | 0.787012          | 0.504      | 0.970              |
| hsa-miR-634       | 0.749757          | 0.787012          | 0.501      | 0.986              |
| hsa-miR-653-5p    | 0.756181          | 0.793051          | 0.513      | 0.999              |
| hsa-miR-627-5p    | 0.761858          | 0.798298          | 0.528      | 0.961              |
| hsa-miR-523-3p    | 0.766728          | 0.802436          | 0.509      | 0.999              |
| hsa-miR-370-3p    | 0.767164          | 0.802436          | 0.571      | 0.961              |
| hsa-miR-450b-5p   | 0.769151          | 0.803804          | 0.503      | 0.999              |
| hsa-miR-99a-5p    | 0.774030          | 0.808189          | 0.505      | 1.185              |
| hsa-miR-208b-3p   | 0.787233          | 0.821249          | 0.533      | 0.994              |
| hsa-miR-3164      | 0.803686          | 0.837674          | 0.504      | 0.999              |
| hsa-miR-30e-3p    | 0.807920          | 0.840689          | 0.508      | 0.955              |
| hsa-miR-573       | 0.807999          | 0.840689          | 0.501      | 0.999              |
| hsa-miR-550b-3p   | 0.811483          | 0.843571          | 0.523      | 0.999              |
| hsa-miR-27a-5p    | 0.817660          | 0.849246          | 0.501      | 0.999              |
| hsa-miR-4325      | 0.823398          | 0.854456          | 0.514      | 1.002              |
| hsa-miR-96-3p     | 0.826924          | 0.857112          | 0.505      | 0.999              |
| hsa-miR-652-3p    | 0.827407          | 0.857112          | 0.567      | 1.050              |
| hsa-miR-147a      | 0.828147          | 0.857129          | 0.506      | 1.001              |
| hsa-miR-141-3p    | 0.833043          | 0.861442          | 0.657      | 1.551              |
| hsa-miR-4252      | 0.836321          | 0.864076          | 0.520      | 0.987              |
| hsa-miR-455-3p    | 0.839522          | 0.866627          | 0.601      | 1.069              |
| hsa-miR-1915-3p   | 0.843528          | 0.870004          | 0.521      | 3.288              |
| hsa-miR-642b-3p   | 0.849484          | 0.875383          | 0.516      | 4.721              |

| <b>miRNA</b>    | <b>ttest_rawp</b> | <b>ttest_adjp</b> | <b>AUC</b> | <b>fold_change</b> |
|-----------------|-------------------|-------------------|------------|--------------------|
| hsa-miR-582-3p  | 0.854575          | 0.879863          | 0.511      | 1.000              |
| hsa-miR-675-5p  | 0.861222          | 0.885935          | 0.506      | 1.001              |
| hsa-let-7f-1-3p | 0.863897          | 0.887915          | 0.527      | 0.905              |
| hsa-miR-422a    | 0.875301          | 0.898855          | 0.503      | 0.999              |
| hsa-miR-548v    | 0.877697          | 0.900534          | 0.519      | 0.980              |
| hsa-miR-329-3p  | 0.879918          | 0.902030          | 0.518      | 1.040              |
| hsa-miR-578     | 0.884072          | 0.905445          | 0.505      | 1.000              |
| hsa-miR-3678-5p | 0.884780          | 0.905445          | 0.511      | 1.000              |
| hsa-miR-4293    | 0.886554          | 0.906476          | 0.502      | 1.000              |
| hsa-miR-4273    | 0.888084          | 0.907257          | 0.512      | 1.000              |
| hsa-miR-3687    | 0.889898          | 0.908325          | 0.510      | 1.000              |
| hsa-miR-1291    | 0.894571          | 0.912308          | 0.555      | 0.977              |
| hsa-miR-3613-3p | 0.900811          | 0.917880          | 0.543      | 0.945              |
| hsa-miR-561-3p  | 0.902599          | 0.918911          | 0.508      | 0.999              |
| hsa-miR-4321    | 0.915534          | 0.931278          | 0.518      | 0.999              |
| hsa-miR-337-3p  | 0.917407          | 0.932382          | 0.534      | 0.968              |
| hsa-miR-548i    | 0.925671          | 0.939973          | 0.506      | 1.000              |
| hsa-miR-339-5p  | 0.928425          | 0.941962          | 0.501      | 0.987              |
| hsa-miR-3908    | 0.929343          | 0.942058          | 0.505      | 0.999              |
| hsa-miR-217     | 0.930113          | 0.942058          | 0.510      | 1.000              |
| hsa-miR-374a-3p | 0.931390          | 0.942545          | 0.501      | 1.000              |
| hsa-miR-569     | 0.939010          | 0.949443          | 0.501      | 1.000              |
| hsa-miR-3188    | 0.942360          | 0.952017          | 0.563      | 1.304              |
| hsa-miR-185-5p  | 0.944692          | 0.953559          | 0.587      | 1.106              |
| hsa-miR-3123    | 0.945713          | 0.953775          | 0.511      | 1.000              |
| hsa-miR-4295    | 0.952779          | 0.960083          | 0.510      | 1.001              |
| hsa-miR-367-3p  | 0.960241          | 0.966779          | 0.503      | 1.000              |
| hsa-miR-346     | 0.962222          | 0.967949          | 0.524      | 1.011              |
| hsa-miR-2355-5p | 0.971042          | 0.975992          | 0.505      | 0.999              |
| hsa-miR-3196    | 0.978338          | 0.982491          | 0.516      | 2.772              |
| hsa-miR-558     | 0.983322          | 0.986658          | 0.503      | 1.000              |
| hsa-miR-3186-3p | 0.989018          | 0.991532          | 0.508      | 1.005              |
| hsa-miR-3065-5p | 0.990971          | 0.992649          | 0.502      | 1.000              |
| hsa-miR-640     | 0.996838          | 0.997681          | 0.519      | 0.972              |
| hsa-miR-19a-5p  | 0.999529          | 0.999529          | 0.508      | 1.000              |



**eTable 9. Signatures for the Comparison of Low Lung Cancer Stages Versus All Non-Lung-Cancer Patients.** The "largely matched" cohort comprises all samples of our study, which were chosen to have a similar age, gender and smoking status distribution. The "perfectly matched" cohort corresponds to a more stringent comparison, containing only samples for which another sample in the other group could be found, such that gender and smoking status are equal and age differs by at most one year.

| Cohort comparison | miRNA signature                                                                                                                   |
|-------------------|-----------------------------------------------------------------------------------------------------------------------------------|
| largely matched   | hsa-miR-1260a,hsa-miR-1260b,hsa-miR-1285-3p,hsa-miR-17-3p,hsa-miR-205-5p,hsa-miR-3152-3p,hsa-miR-374b-5p,hsa-miR-378b,hsa-miR-564 |
| perfectly matched | hsa-miR-1260a,hsa-miR-1285-3p,hsa-miR-145-5p,hsa-miR-205-5p,hsa-miR-298                                                           |

**eTable 10. Classification Performance for Different Age/Smoking Thresholds.** ACC = Accuracy, Sens=Sensitivity, Spec=Specificity, AUC=Area under the receiver operating characteristic curve.

| comparison LCa vs all others | #samples | #positive samples | #negative samples | ACC   | Sens  | Spec  | #features | AUC   |
|------------------------------|----------|-------------------|-------------------|-------|-------|-------|-----------|-------|
| age >= 0 & pack years >= 50  | 321      | 103               | 218               | 0.918 | 0.943 | 0.907 | 15        | 0.977 |
| age >= 60 & pack years >= 50 | 272      | 77                | 195               | 0.926 | 0.923 | 0.927 | 15        | 0.977 |
| age >= 0 & pack years >= 30  | 622      | 241               | 381               | 0.906 | 0.962 | 0.871 | 14        | 0.975 |
| age >= 55 & pack years >= 30 | 568      | 207               | 361               | 0.902 | 0.951 | 0.874 | 15        | 0.974 |
| age >= 0 & pack years >= 40  | 482      | 178               | 304               | 0.907 | 0.953 | 0.881 | 15        | 0.973 |
| age >= 55 & pack years >= 40 | 449      | 159               | 290               | 0.901 | 0.947 | 0.876 | 15        | 0.971 |
| age >= 55 & pack years >= 0  | 1404     | 283               | 1121              | 0.920 | 0.906 | 0.923 | 15        | 0.969 |
| age >= 70 & pack years >= 30 | 225      | 79                | 146               | 0.908 | 0.932 | 0.895 | 12        | 0.968 |
| age >= 65 & pack years >= 50 | 220      | 62                | 158               | 0.912 | 0.932 | 0.904 | 9         | 0.968 |
| age >= 0 & pack years >= 0   | 1680     | 331               | 1349              | 0.915 | 0.911 | 0.916 | 14        | 0.967 |
| age >= 55 & pack years >= 50 | 302      | 92                | 210               | 0.901 | 0.920 | 0.893 | 10        | 0.967 |
| age >= 60 & pack years >= 0  | 1245     | 235               | 1010              | 0.923 | 0.899 | 0.929 | 15        | 0.967 |
| age >= 65 & pack years >= 40 | 307      | 98                | 209               | 0.902 | 0.941 | 0.884 | 9         | 0.966 |
| age >= 65 & pack years >= 30 | 369      | 124               | 245               | 0.898 | 0.932 | 0.881 | 13        | 0.963 |
| age >= 60 & pack years >= 30 | 495      | 172               | 323               | 0.886 | 0.933 | 0.861 | 13        | 0.962 |
| age >= 60 & pack years >= 40 | 400      | 133               | 267               | 0.891 | 0.938 | 0.868 | 10        | 0.957 |
| age >= 65 & pack years >= 0  | 960      | 171               | 789               | 0.919 | 0.876 | 0.928 | 12        | 0.955 |
| age >= 55 & pack years >= 60 | 209      | 46                | 163               | 0.915 | 0.848 | 0.934 | 14        | 0.953 |
| age >= 70 & pack years >= 40 | 188      | 59                | 129               | 0.902 | 0.917 | 0.894 | 10        | 0.952 |
| age >= 60 & pack years >= 60 | 187      | 36                | 151               | 0.905 | 0.889 | 0.909 | 7         | 0.948 |
| age >= 0 & pack years >= 60  | 217      | 49                | 168               | 0.895 | 0.852 | 0.907 | 11        | 0.945 |
| age >= 75 & pack years >= 40 | 68       | 27                | 41                | 0.873 | 0.917 | 0.842 | 8         | 0.944 |
| age >= 70 & pack years >= 50 | 131      | 35                | 96                | 0.892 | 0.903 | 0.888 | 5         | 0.944 |

|                                |     |     |     |       |       |       |    |       |
|--------------------------------|-----|-----|-----|-------|-------|-------|----|-------|
| age >= 70 & pack<br>years >= 0 | 634 | 119 | 515 | 0.915 | 0.846 | 0.930 | 10 | 0.937 |
|--------------------------------|-----|-----|-----|-------|-------|-------|----|-------|

| <b>comparison LCa vs all others</b> | <b>#samples</b> | <b>#positive samples</b> | <b>#negative samples</b> | <b>ACC</b> | <b>Sens</b> | <b>Spec</b> | <b>#features</b> | <b>AUC</b> |
|-------------------------------------|-----------------|--------------------------|--------------------------|------------|-------------|-------------|------------------|------------|
| age >= 75 & pack years >= 30        | 82              | 35                       | 47                       | 0.878      | 0.931       | 0.840       | 7                | 0.934      |
| age >= 65 & pack years >= 60        | 148             | 30                       | 118                      | 0.905      | 0.880       | 0.912       | 8                | 0.933      |
| age >= 75 & pack years >= 0         | 308             | 51                       | 257                      | 0.888      | 0.777       | 0.910       | 10               | 0.917      |
| age >= 70 & pack years >= 60        | 86              | 15                       | 71                       | 0.933      | 0.627       | 0.997       | 4                | 0.863      |
| age >= 75 & pack years >= 50        | 44              | 16                       | 28                       | 0.797      | 0.790       | 0.800       | 2                | 0.861      |
| age >= 75 & pack years >= 60        | 26              | 7                        | 19                       | 0.780      | 0.420       | 0.910       | 2                | 0.698      |

**eTable 11. PPV and NPV for a Range of Prevalence Rates.** The estimated prevalence rate ranges in clinical care for the different scenarios are highlighted in orange, blue and green, respectively. The lowest prevalence has been taken to match the incidence from the National Lung Screening Trial where 645 cases per 100,000 person-years (1060 cancers) in the low-dose CT group were observed. Scenario 1 compares lung cancer patients to all other individuals. Scenario 2 compares lung cancer to non-tumor lung disease patients. Scenario 3 compares patients with lung cancer stage 1-2 to all other non-lung-cancer patients. The performance values are reported for the resampling approach as well as for the training and validation split approach. SC = Scenario, PRV = Prevalence.

| PRV                    | 0.006 | 0.01  | 0.05  | 0.1   | 0.15  | 0.2   | 0.25  | 0.3   | 0.35  | 0.4   | 0.45  | 0.5   |
|------------------------|-------|-------|-------|-------|-------|-------|-------|-------|-------|-------|-------|-------|
| Re-sampling            |       |       |       |       |       |       |       |       |       |       |       |       |
| SC 1 PPV               | 0.119 | 0.173 | 0.522 | 0.698 | 0.786 | 0.839 | 0.874 | 0.899 | 0.918 | 0.933 | 0.944 | 0.954 |
| SC 2 PPV               | 0.057 | 0.086 | 0.328 | 0.508 | 0.621 | 0.699 | 0.756 | 0.799 | 0.833 | 0.861 | 0.884 | 0.903 |
| SC 3 PPV               | 0.172 | 0.245 | 0.628 | 0.781 | 0.850 | 0.889 | 0.914 | 0.932 | 0.945 | 0.955 | 0.963 | 0.970 |
|                        |       |       |       |       |       |       |       |       |       |       |       |       |
| SC 1 NPV               | 0.999 | 0.998 | 0.990 | 0.979 | 0.966 | 0.953 | 0.938 | 0.922 | 0.904 | 0.884 | 0.861 | 0.835 |
| SC 2 NPV               | 1.000 | 1.000 | 0.998 | 0.996 | 0.993 | 0.991 | 0.988 | 0.984 | 0.980 | 0.975 | 0.970 | 0.963 |
| SC 3 NPV               | 0.999 | 0.998 | 0.989 | 0.978 | 0.965 | 0.951 | 0.936 | 0.920 | 0.901 | 0.880 | 0.857 | 0.830 |
| Train/validation split |       |       |       |       |       |       |       |       |       |       |       |       |
| SC 1 PPV               | 0.076 | 0.114 | 0.401 | 0.586 | 0.692 | 0.761 | 0.809 | 0.845 | 0.873 | 0.895 | 0.912 | 0.927 |
| SC 2 PPV               | 0.052 | 0.079 | 0.308 | 0.484 | 0.599 | 0.679 | 0.738 | 0.784 | 0.820 | 0.849 | 0.874 | 0.894 |
| SC 3 PPV               | 0.165 | 0.236 | 0.616 | 0.772 | 0.843 | 0.884 | 0.911 | 0.929 | 0.943 | 0.953 | 0.961 | 0.968 |
|                        |       |       |       |       |       |       |       |       |       |       |       |       |
| SC 1 NPV               | 0.999 | 0.998 | 0.990 | 0.980 | 0.969 | 0.956 | 0.942 | 0.927 | 0.910 | 0.891 | 0.869 | 0.845 |
| SC 2 NPV               | 1.000 | 1.000 | 0.998 | 0.996 | 0.993 | 0.990 | 0.987 | 0.983 | 0.979 | 0.974 | 0.968 | 0.961 |
| SC 3 NPV               | 0.998 | 0.998 | 0.987 | 0.974 | 0.959 | 0.943 | 0.925 | 0.906 | 0.884 | 0.861 | 0.834 | 0.804 |

**eTable 12. Result Metrics for the Comparison of NSCLC Versus SCLC**

| <b>miRNA</b>      | <b>ttest_rawp</b> | <b>ttest_adjp</b> | <b>AUC</b> | <b>fold_change</b> |
|-------------------|-------------------|-------------------|------------|--------------------|
| hsa-miR-30a-5p    | 8.66E-49          | 1.02E-45          | 0.844      | 6.744              |
| hsa-miR-589-3p    | 3.67E-45          | 2.17E-42          | 0.813      | 1.353              |
| hsa-miR-29c-5p    | 1.77E-44          | 6.99E-42          | 0.849      | 3.114              |
| hsa-miR-500b-5p   | 4.71E-40          | 1.39E-37          | 0.830      | 2.173              |
| hsa-miR-378a-5p   | 2.97E-39          | 7.02E-37          | 0.845      | 2.646              |
| hsa-miR-181c-3p   | 1.73E-38          | 3.42E-36          | 0.806      | 1.254              |
| hsa-miR-30d-5p    | 3.62E-38          | 6.12E-36          | 0.807      | 2.395              |
| hsa-miR-18a-3p    | 2.09E-37          | 3.10E-35          | 0.810      | 1.559              |
| hsa-miR-16-5p     | 1.06E-36          | 1.40E-34          | 0.790      | 0.538              |
| hsa-miR-3615      | 2.64E-36          | 3.12E-34          | 0.798      | 1.235              |
| hsa-miR-28-3p     | 3.35E-36          | 3.60E-34          | 0.777      | 1.187              |
| hsa-miR-93-5p     | 3.19E-33          | 3.15E-31          | 0.805      | 0.455              |
| hsa-miR-326       | 4.33E-32          | 3.94E-30          | 0.798      | 2.060              |
| hsa-miR-186-5p    | 5.35E-32          | 4.52E-30          | 0.806      | 2.589              |
| hsa-miR-484       | 1.86E-31          | 1.38E-29          | 0.807      | 2.320              |
| hsa-miR-664a-3p   | 1.82E-31          | 1.38E-29          | 0.801      | 1.814              |
| hsa-miR-151a-3p   | 9.63E-31          | 6.33E-29          | 0.807      | 2.285              |
| hsa-miR-17-5p     | 9.12E-31          | 6.33E-29          | 0.784      | 0.486              |
| hsa-miR-103a-3p   | 4.62E-30          | 2.87E-28          | 0.772      | 0.642              |
| hsa-miR-3130-5p   | 5.05E-30          | 2.98E-28          | 0.774      | 1.143              |
| hsa-miR-126-3p    | 4.61E-29          | 2.59E-27          | 0.776      | 0.411              |
| hsa-miR-183-5p    | 9.92E-29          | 5.33E-27          | 0.771      | 0.469              |
| hsa-miR-942-5p    | 4.71E-27          | 2.42E-25          | 0.794      | 2.287              |
| hsa-let-7g-5p     | 5.82E-27          | 2.87E-25          | 0.788      | 0.420              |
| hsa-miR-15a-5p    | 1.25E-25          | 5.92E-24          | 0.755      | 0.525              |
| hsa-miR-3200-3p   | 3.81E-25          | 1.73E-23          | 0.770      | 1.655              |
| hsa-miR-16-1-3p   | 4.24E-25          | 1.86E-23          | 0.774      | 1.137              |
| hsa-miR-3680-3p   | 8.86E-25          | 3.74E-23          | 0.780      | 1.085              |
| hsa-miR-20b-5p    | 1.16E-23          | 4.73E-22          | 0.764      | 0.483              |
| hsa-miR-361-3p    | 1.44E-23          | 5.67E-22          | 0.786      | 1.828              |
| hsa-miR-500a-5p   | 2.39E-23          | 9.11E-22          | 0.781      | 1.691              |
| hsa-miR-199a-3p   | 3.49E-23          | 1.29E-21          | 0.769      | 0.397              |
| hsa-miR-30b-5p    | 4.34E-23          | 1.56E-21          | 0.772      | 1.979              |
| hsa-miR-15b-5p    | 1.29E-22          | 4.50E-21          | 0.757      | 0.708              |
| hsa-miR-103a-2-5p | 5.65E-22          | 1.91E-20          | 0.733      | 1.500              |
| hsa-miR-30c-5p    | 6.47E-22          | 2.13E-20          | 0.760      | 1.873              |
| hsa-let-7i-5p     | 7.12E-22          | 2.28E-20          | 0.742      | 0.590              |
| hsa-let-7d-5p     | 1.27E-21          | 3.95E-20          | 0.763      | 0.573              |
| hsa-miR-26b-5p    | 1.45E-21          | 4.41E-20          | 0.764      | 0.428              |
| hsa-miR-550a-3p   | 3.13E-21          | 9.27E-20          | 0.800      | 1.776              |
| hsa-miR-130b-5p   | 3.70E-21          | 1.07E-19          | 0.736      | 1.264              |
| hsa-miR-107       | 6.00E-21          | 1.69E-19          | 0.740      | 0.658              |
| hsa-miR-96-5p     | 1.45E-20          | 3.98E-19          | 0.725      | 0.516              |
| hsa-miR-363-3p    | 1.87E-20          | 5.04E-19          | 0.722      | 0.641              |
| hsa-miR-20a-5p    | 1.20E-19          | 3.15E-18          | 0.752      | 0.439              |

| miRNA             | ttest_rawp | ttest_adjp | AUC   | fold_change |
|-------------------|------------|------------|-------|-------------|
| hsa-miR-340-3p    | 1.95E-19   | 5.03E-18   | 0.746 | 2.042       |
| hsa-miR-627-5p    | 2.66E-19   | 6.69E-18   | 0.735 | 1.905       |
| hsa-miR-769-5p    | 8.16E-19   | 2.01E-17   | 0.721 | 1.472       |
| hsa-miR-361-5p    | 8.33E-19   | 2.01E-17   | 0.748 | 1.584       |
| hsa-miR-331-3p    | 2.94E-18   | 6.96E-17   | 0.774 | 1.663       |
| hsa-miR-196a-3p   | 3.16E-18   | 7.32E-17   | 0.702 | 1.066       |
| hsa-miR-374b-5p   | 4.69E-18   | 1.07E-16   | 0.718 | 0.521       |
| hsa-miR-181a-2-3p | 5.29E-18   | 1.18E-16   | 0.725 | 1.297       |
| hsa-miR-324-5p    | 5.69E-18   | 1.23E-16   | 0.761 | 1.579       |
| hsa-miR-144-5p    | 5.73E-18   | 1.23E-16   | 0.736 | 0.295       |
| hsa-miR-215-5p    | 7.70E-18   | 1.63E-16   | 0.759 | 1.996       |
| hsa-miR-126-5p    | 9.64E-18   | 2.00E-16   | 0.754 | 0.681       |
| hsa-miR-501-5p    | 1.62E-17   | 3.30E-16   | 0.739 | 1.564       |
| hsa-miR-550b-3p   | 4.82E-17   | 9.67E-16   | 0.691 | 1.065       |
| hsa-miR-362-5p    | 5.27E-17   | 1.04E-15   | 0.747 | 1.544       |
| hsa-miR-339-3p    | 9.54E-17   | 1.85E-15   | 0.719 | 1.461       |
| hsa-miR-4306      | 3.08E-16   | 5.88E-15   | 0.797 | 1.643       |
| hsa-miR-665       | 4.26E-16   | 7.99E-15   | 0.737 | 1.377       |
| hsa-miR-199a-5p   | 1.06E-15   | 1.89E-14   | 0.729 | 1.881       |
| hsa-miR-1301-3p   | 1.04E-15   | 1.89E-14   | 0.724 | 1.067       |
| hsa-miR-330-3p    | 1.04E-15   | 1.89E-14   | 0.720 | 1.414       |
| hsa-miR-433-3p    | 1.07E-15   | 1.89E-14   | 0.664 | 1.089       |
| hsa-miR-128-3p    | 1.42E-15   | 2.48E-14   | 0.754 | 1.572       |
| hsa-miR-629-3p    | 1.88E-15   | 3.22E-14   | 0.710 | 1.350       |
| hsa-let-7a-5p     | 2.03E-15   | 3.43E-14   | 0.735 | 0.601       |
| hsa-miR-195-5p    | 2.92E-15   | 4.86E-14   | 0.717 | 0.565       |
| hsa-miR-505-3p    | 3.83E-15   | 6.29E-14   | 0.726 | 1.592       |
| hsa-miR-144-3p    | 4.77E-15   | 7.73E-14   | 0.717 | 0.366       |
| hsa-miR-576-3p    | 6.70E-15   | 1.07E-13   | 0.694 | 1.065       |
| hsa-miR-340-5p    | 1.52E-14   | 2.40E-13   | 0.713 | 1.700       |
| hsa-miR-500a-3p   | 2.91E-14   | 4.53E-13   | 0.726 | 1.450       |
| hsa-miR-362-3p    | 3.90E-14   | 5.99E-13   | 0.696 | 1.765       |
| hsa-miR-1285-3p   | 4.64E-14   | 6.95E-13   | 0.727 | 1.447       |
| hsa-miR-760       | 4.63E-14   | 6.95E-13   | 0.703 | 1.118       |
| hsa-miR-10a-5p    | 7.99E-14   | 1.18E-12   | 0.687 | 2.464       |
| hsa-miR-1976      | 9.85E-14   | 1.44E-12   | 0.674 | 1.354       |
| hsa-miR-21-5p     | 1.35E-13   | 1.95E-12   | 0.686 | 0.635       |
| hsa-miR-1908-5p   | 1.41E-13   | 2.00E-12   | 0.684 | 1.070       |
| hsa-miR-3605-3p   | 1.73E-13   | 2.44E-12   | 0.695 | 1.250       |
| hsa-miR-454-5p    | 1.79E-13   | 2.49E-12   | 0.687 | 1.363       |
| hsa-miR-19b-3p    | 3.19E-13   | 4.39E-12   | 0.733 | 1.725       |
| hsa-miR-4326      | 4.64E-13   | 6.31E-12   | 0.673 | 1.212       |
| hsa-miR-15a-3p    | 4.81E-13   | 6.46E-12   | 0.682 | 1.170       |
| hsa-miR-1180-3p   | 6.98E-13   | 9.28E-12   | 0.694 | 1.256       |
| hsa-miR-2115-5p   | 7.69E-13   | 1.01E-11   | 0.697 | 1.156       |
| hsa-miR-3179      | 8.13E-13   | 1.06E-11   | 0.690 | 1.104       |

| miRNA           | ttest_rawp | ttest_adjp | AUC   | fold_change |
|-----------------|------------|------------|-------|-------------|
| hsa-miR-181a-3p | 1.03E-12   | 1.33E-11   | 0.663 | 1.348       |
| hsa-miR-223-5p  | 1.95E-12   | 2.48E-11   | 0.684 | 0.759       |
| hsa-miR-27b-3p  | 2.06E-12   | 2.60E-11   | 0.689 | 0.776       |
| hsa-miR-30e-5p  | 2.22E-12   | 2.76E-11   | 0.704 | 1.494       |
| hsa-miR-1276    | 3.38E-12   | 4.17E-11   | 0.686 | 1.048       |
| hsa-miR-345-5p  | 5.52E-12   | 6.74E-11   | 0.722 | 1.134       |
| hsa-miR-582-5p  | 6.19E-12   | 7.47E-11   | 0.736 | 0.676       |
| hsa-miR-3154    | 1.11E-11   | 1.33E-10   | 0.704 | 1.124       |
| hsa-miR-335-5p  | 1.23E-11   | 1.46E-10   | 0.676 | 1.442       |
| hsa-miR-18a-5p  | 1.67E-11   | 1.95E-10   | 0.679 | 0.576       |
| hsa-miR-221-5p  | 2.66E-11   | 3.08E-10   | 0.690 | 0.795       |
| hsa-miR-3667-5p | 2.73E-11   | 3.14E-10   | 0.661 | 1.963       |
| hsa-miR-192-5p  | 3.22E-11   | 3.66E-10   | 0.698 | 1.595       |
| hsa-miR-1273c   | 3.26E-11   | 3.68E-10   | 0.728 | 1.169       |
| hsa-miR-365a-3p | 3.87E-11   | 4.32E-10   | 0.688 | 1.434       |
| hsa-miR-196b-5p | 6.07E-11   | 6.71E-10   | 0.679 | 0.681       |
| hsa-miR-342-3p  | 8.61E-11   | 9.43E-10   | 0.696 | 1.422       |
| hsa-miR-339-5p  | 1.24E-10   | 1.35E-09   | 0.679 | 1.435       |
| hsa-miR-425-5p  | 2.19E-10   | 2.36E-09   | 0.741 | 1.506       |
| hsa-miR-194-5p  | 2.25E-10   | 2.40E-09   | 0.685 | 1.603       |
| hsa-let-7b-5p   | 2.34E-10   | 2.47E-09   | 0.666 | 0.697       |
| hsa-miR-3920    | 2.75E-10   | 2.88E-09   | 0.690 | 0.918       |
| hsa-let-7f-5p   | 3.59E-10   | 3.73E-09   | 0.704 | 0.552       |
| hsa-miR-142-5p  | 3.71E-10   | 3.82E-09   | 0.691 | 1.397       |
| hsa-miR-301a-3p | 6.17E-10   | 6.29E-09   | 0.674 | 0.625       |
| hsa-miR-638     | 6.53E-10   | 6.60E-09   | 0.679 | 0.819       |
| hsa-miR-2861    | 8.86E-10   | 8.88E-09   | 0.675 | 0.679       |
| hsa-miR-98-5p   | 1.15E-09   | 1.14E-08   | 0.689 | 0.507       |
| hsa-miR-125b-5p | 1.16E-09   | 1.15E-08   | 0.657 | 1.781       |
| hsa-miR-154-5p  | 1.33E-09   | 1.30E-08   | 0.649 | 1.273       |
| hsa-miR-501-3p  | 1.36E-09   | 1.32E-08   | 0.677 | 1.327       |
| hsa-miR-3665    | 1.52E-09   | 1.46E-08   | 0.682 | 0.995       |
| hsa-miR-202-3p  | 1.74E-09   | 1.66E-08   | 0.694 | 1.086       |
| hsa-miR-337-3p  | 1.79E-09   | 1.70E-08   | 0.615 | 1.376       |
| hsa-miR-3135a   | 2.35E-09   | 2.21E-08   | 0.652 | 1.032       |
| hsa-miR-2110    | 3.21E-09   | 2.99E-08   | 0.646 | 1.359       |
| hsa-miR-106b-5p | 3.50E-09   | 3.24E-08   | 0.622 | 0.841       |
| hsa-miR-3653-3p | 4.39E-09   | 4.03E-08   | 0.673 | 1.749       |
| hsa-miR-378b    | 4.72E-09   | 4.30E-08   | 0.683 | 1.246       |
| hsa-miR-33b-3p  | 5.44E-09   | 4.92E-08   | 0.706 | 0.546       |
| hsa-miR-23a-5p  | 7.48E-09   | 6.71E-08   | 0.694 | 1.084       |
| hsa-miR-376a-3p | 8.11E-09   | 7.21E-08   | 0.647 | 1.343       |
| hsa-miR-18b-5p  | 1.17E-08   | 1.03E-07   | 0.657 | 0.660       |
| hsa-miR-26b-3p  | 1.17E-08   | 1.03E-07   | 0.651 | 1.123       |
| hsa-miR-551b-3p | 1.37E-08   | 1.19E-07   | 0.669 | 0.934       |
| hsa-miR-574-5p  | 1.57E-08   | 1.35E-07   | 0.693 | 1.056       |



| miRNA            | ttest_rawp | ttest_adjp | AUC   | fold_change |
|------------------|------------|------------|-------|-------------|
| hsa-miR-130a-3p  | 1.65E-08   | 1.42E-07   | 0.643 | 0.749       |
| hsa-miR-1271-5p  | 1.88E-08   | 1.60E-07   | 0.670 | 1.261       |
| hsa-miR-1255b-5p | 1.89E-08   | 1.60E-07   | 0.656 | 1.305       |
| hsa-miR-188-3p   | 1.92E-08   | 1.61E-07   | 0.629 | 1.054       |
| hsa-miR-671-5p   | 2.33E-08   | 1.94E-07   | 0.673 | 0.809       |
| hsa-miR-3907     | 2.73E-08   | 2.25E-07   | 0.639 | 1.334       |
| hsa-miR-1825     | 2.99E-08   | 2.46E-07   | 0.674 | 0.670       |
| hsa-miR-99a-5p   | 3.01E-08   | 2.46E-07   | 0.661 | 1.489       |
| hsa-miR-770-5p   | 3.30E-08   | 2.67E-07   | 0.626 | 1.046       |
| hsa-miR-133b     | 3.42E-08   | 2.76E-07   | 0.661 | 1.470       |
| hsa-miR-4323     | 3.90E-08   | 3.11E-07   | 0.637 | 1.333       |
| hsa-miR-374a-5p  | 4.24E-08   | 3.36E-07   | 0.651 | 0.579       |
| hsa-miR-1915-3p  | 4.72E-08   | 3.72E-07   | 0.663 | 2.211       |
| hsa-miR-184      | 6.27E-08   | 4.91E-07   | 0.632 | 1.050       |
| hsa-miR-576-5p   | 6.69E-08   | 5.21E-07   | 0.665 | 0.901       |
| hsa-miR-140-5p   | 7.48E-08   | 5.79E-07   | 0.644 | 0.680       |
| hsa-miR-3127-5p  | 8.06E-08   | 6.19E-07   | 0.651 | 1.306       |
| hsa-miR-483-3p   | 1.23E-07   | 9.36E-07   | 0.668 | 0.811       |
| hsa-miR-532-5p   | 1.55E-07   | 1.17E-06   | 0.619 | 0.833       |
| hsa-miR-1279     | 1.65E-07   | 1.25E-06   | 0.655 | 0.953       |
| hsa-miR-491-5p   | 1.73E-07   | 1.30E-06   | 0.688 | 1.057       |
| hsa-miR-3118     | 1.79E-07   | 1.32E-06   | 0.652 | 0.968       |
| hsa-miR-99b-5p   | 1.79E-07   | 1.32E-06   | 0.650 | 1.342       |
| hsa-miR-554      | 1.96E-07   | 1.44E-06   | 0.665 | 0.964       |
| hsa-miR-193a-3p  | 1.97E-07   | 1.44E-06   | 0.660 | 1.126       |
| hsa-miR-3121-3p  | 2.18E-07   | 1.58E-06   | 0.623 | 1.210       |
| hsa-miR-3684     | 2.37E-07   | 1.71E-06   | 0.648 | 0.970       |
| hsa-miR-502-5p   | 2.40E-07   | 1.72E-06   | 0.637 | 1.363       |
| hsa-miR-454-3p   | 2.42E-07   | 1.73E-06   | 0.654 | 0.559       |
| hsa-miR-532-3p   | 3.43E-07   | 2.43E-06   | 0.666 | 1.372       |
| hsa-miR-140-3p   | 3.61E-07   | 2.54E-06   | 0.721 | 1.346       |
| hsa-miR-296-5p   | 3.72E-07   | 2.61E-06   | 0.627 | 1.441       |
| hsa-miR-3656     | 4.09E-07   | 2.85E-06   | 0.645 | 0.704       |
| hsa-miR-101-3p   | 4.70E-07   | 3.25E-06   | 0.646 | 0.585       |
| hsa-miR-148a-5p  | 4.88E-07   | 3.36E-06   | 0.668 | 1.054       |
| hsa-miR-193b-5p  | 5.38E-07   | 3.68E-06   | 0.664 | 1.068       |
| hsa-miR-502-3p   | 5.46E-07   | 3.71E-06   | 0.646 | 1.261       |
| hsa-miR-191-3p   | 6.30E-07   | 4.23E-06   | 0.657 | 0.688       |
| hsa-miR-142-3p   | 6.26E-07   | 4.23E-06   | 0.653 | 1.370       |
| hsa-miR-4313     | 6.63E-07   | 4.43E-06   | 0.651 | 0.706       |
| hsa-miR-3196     | 7.30E-07   | 4.85E-06   | 0.667 | 1.387       |
| hsa-miR-202-5p   | 7.38E-07   | 4.88E-06   | 0.645 | 0.929       |
| hsa-miR-1228-3p  | 7.64E-07   | 5.02E-06   | 0.668 | 0.805       |
| hsa-miR-1238-3p  | 7.83E-07   | 5.12E-06   | 0.660 | 0.722       |
| hsa-miR-548c-3p  | 8.32E-07   | 5.41E-06   | 0.652 | 0.929       |
| hsa-miR-409-3p   | 9.30E-07   | 6.01E-06   | 0.626 | 1.534       |

| <b>miRNA</b>     | <b>ttest_rawp</b> | <b>ttest_adjp</b> | <b>AUC</b> | <b>fold_change</b> |
|------------------|-------------------|-------------------|------------|--------------------|
| hsa-miR-939-5p   | 1.00E-06          | 6.45E-06          | 0.654      | 0.772              |
| hsa-miR-556-3p   | 1.05E-06          | 6.71E-06          | 0.651      | 0.918              |
| hsa-let-7f-1-3p  | 1.06E-06          | 6.71E-06          | 0.643      | 0.730              |
| hsa-miR-26a-2-3p | 1.23E-06          | 7.78E-06          | 0.640      | 0.909              |
| hsa-let-7f-2-3p  | 1.31E-06          | 8.23E-06          | 0.641      | 0.929              |
| hsa-miR-1255a    | 1.50E-06          | 9.41E-06          | 0.655      | 1.080              |
| hsa-miR-493-5p   | 1.62E-06          | 1.01E-05          | 0.636      | 0.921              |
| hsa-miR-641      | 1.68E-06          | 1.04E-05          | 0.634      | 1.094              |
| hsa-miR-2053     | 1.69E-06          | 1.04E-05          | 0.646      | 0.928              |
| hsa-miR-4275     | 1.80E-06          | 1.10E-05          | 0.640      | 0.955              |
| hsa-miR-29b-1-5p | 2.11E-06          | 1.29E-05          | 0.603      | 0.736              |
| hsa-miR-4310     | 2.14E-06          | 1.29E-05          | 0.638      | 0.731              |
| hsa-miR-3621     | 2.13E-06          | 1.29E-05          | 0.637      | 1.033              |
| hsa-miR-34a-5p   | 2.23E-06          | 1.34E-05          | 0.667      | 0.962              |
| hsa-miR-1324     | 2.27E-06          | 1.36E-05          | 0.646      | 0.966              |
| hsa-miR-3691-5p  | 2.45E-06          | 1.46E-05          | 0.621      | 1.022              |
| hsa-miR-656-3p   | 2.47E-06          | 1.46E-05          | 0.644      | 0.949              |
| hsa-miR-4290     | 2.96E-06          | 1.74E-05          | 0.653      | 0.842              |
| hsa-miR-190a-5p  | 3.06E-06          | 1.79E-05          | 0.631      | 0.873              |
| hsa-miR-3176     | 3.08E-06          | 1.79E-05          | 0.615      | 1.179              |
| hsa-miR-455-5p   | 3.24E-06          | 1.88E-05          | 0.644      | 0.977              |
| hsa-miR-3670     | 3.30E-06          | 1.90E-05          | 0.613      | 0.954              |
| hsa-miR-654-5p   | 3.32E-06          | 1.91E-05          | 0.622      | 1.046              |
| hsa-miR-26a-5p   | 3.68E-06          | 2.11E-05          | 0.598      | 0.865              |
| hsa-miR-548j-5p  | 4.12E-06          | 2.34E-05          | 0.612      | 1.034              |
| hsa-let-7b-3p    | 4.43E-06          | 2.51E-05          | 0.627      | 0.725              |
| hsa-miR-1234-3p  | 4.83E-06          | 2.69E-05          | 0.662      | 0.866              |
| hsa-miR-17-3p    | 4.81E-06          | 2.69E-05          | 0.629      | 0.817              |
| hsa-miR-1278     | 4.79E-06          | 2.69E-05          | 0.622      | 0.954              |
| hsa-miR-3609     | 5.11E-06          | 2.84E-05          | 0.671      | 1.060              |
| hsa-miR-152-3p   | 5.21E-06          | 2.88E-05          | 0.628      | 1.133              |
| hsa-miR-767-3p   | 5.46E-06          | 3.00E-05          | 0.639      | 0.890              |
| hsa-miR-572      | 6.17E-06          | 3.38E-05          | 0.629      | 0.856              |
| hsa-miR-551b-5p  | 6.52E-06          | 3.56E-05          | 0.632      | 1.024              |
| hsa-miR-3124-5p  | 8.20E-06          | 4.45E-05          | 0.652      | 1.070              |
| hsa-miR-3922-3p  | 8.57E-06          | 4.63E-05          | 0.626      | 0.948              |
| hsa-miR-149-5p   | 9.08E-06          | 4.88E-05          | 0.634      | 0.760              |
| hsa-miR-4318     | 1.05E-05          | 5.64E-05          | 0.601      | 0.826              |
| hsa-miR-933      | 1.08E-05          | 5.73E-05          | 0.650      | 0.793              |
| hsa-miR-548e-3p  | 1.09E-05          | 5.79E-05          | 0.608      | 1.063              |
| hsa-miR-515-5p   | 1.10E-05          | 5.83E-05          | 0.623      | 0.940              |
| hsa-miR-424-5p   | 1.14E-05          | 5.99E-05          | 0.620      | 0.666              |
| hsa-miR-27a-3p   | 1.19E-05          | 6.22E-05          | 0.607      | 0.585              |
| hsa-miR-3613-3p  | 1.20E-05          | 6.24E-05          | 0.615      | 0.817              |
| hsa-miR-3174     | 1.21E-05          | 6.29E-05          | 0.628      | 1.033              |
| hsa-miR-615-5p   | 1.42E-05          | 7.31E-05          | 0.559      | 1.055              |

| miRNA           | ttest_rawp | ttest_adjp | AUC   | fold_change |
|-----------------|------------|------------|-------|-------------|
| hsa-miR-214-3p  | 1.44E-05   | 7.41E-05   | 0.622 | 1.054       |
| hsa-miR-135b-5p | 1.53E-05   | 7.84E-05   | 0.629 | 0.919       |
| hsa-miR-448     | 1.68E-05   | 8.55E-05   | 0.614 | 0.966       |
| hsa-miR-324-3p  | 1.77E-05   | 9.01E-05   | 0.651 | 1.234       |
| hsa-miR-764     | 1.80E-05   | 9.11E-05   | 0.620 | 0.937       |
| hsa-miR-25-3p   | 1.84E-05   | 9.27E-05   | 0.742 | 1.287       |
| hsa-miR-3177-3p | 2.01E-05   | 0.000101   | 0.612 | 1.032       |
| hsa-miR-543     | 2.08E-05   | 0.000104   | 0.600 | 1.203       |
| hsa-miR-182-3p  | 2.13E-05   | 0.000106   | 0.616 | 0.971       |
| hsa-miR-155-3p  | 2.16E-05   | 0.000107   | 0.604 | 0.954       |
| hsa-let-7c-5p   | 2.19E-05   | 0.000108   | 0.628 | 0.667       |
| hsa-miR-3688-3p | 2.24E-05   | 0.000110   | 0.650 | 1.050       |
| hsa-miR-3921    | 2.44E-05   | 0.000119   | 0.618 | 0.979       |
| hsa-miR-1207-3p | 2.54E-05   | 0.000123   | 0.606 | 0.976       |
| hsa-miR-151a-5p | 2.59E-05   | 0.000125   | 0.675 | 1.263       |
| hsa-miR-4254    | 2.60E-05   | 0.000125   | 0.650 | 0.786       |
| hsa-let-7a-3p   | 2.83E-05   | 0.000136   | 0.610 | 0.958       |
| hsa-miR-329-3p  | 2.87E-05   | 0.000137   | 0.590 | 1.177       |
| hsa-miR-3679-3p | 2.92E-05   | 0.000139   | 0.650 | 0.930       |
| hsa-miR-378c    | 2.99E-05   | 0.000142   | 0.590 | 1.045       |
| hsa-miR-431-5p  | 3.06E-05   | 0.000145   | 0.618 | 1.076       |
| hsa-miR-466     | 3.13E-05   | 0.000147   | 0.637 | 0.860       |
| hsa-miR-1537-3p | 3.18E-05   | 0.000149   | 0.619 | 0.978       |
| hsa-miR-185-5p  | 3.27E-05   | 0.000153   | 0.689 | 1.318       |
| hsa-miR-30e-3p  | 3.38E-05   | 0.000157   | 0.620 | 1.332       |
| hsa-miR-4312    | 3.44E-05   | 0.000160   | 0.616 | 0.830       |
| hsa-miR-1178-3p | 3.53E-05   | 0.000163   | 0.619 | 0.965       |
| hsa-miR-1299    | 3.67E-05   | 0.000169   | 0.679 | 1.231       |
| hsa-miR-34a-3p  | 3.73E-05   | 0.000171   | 0.622 | 0.976       |
| hsa-miR-3193    | 3.80E-05   | 0.000174   | 0.609 | 1.027       |
| hsa-miR-24-3p   | 3.90E-05   | 0.000177   | 0.584 | 0.865       |
| hsa-miR-642b-3p | 4.29E-05   | 0.000194   | 0.638 | 1.162       |
| hsa-miR-93-3p   | 4.34E-05   | 0.000196   | 0.655 | 1.097       |
| hsa-miR-204-5p  | 4.35E-05   | 0.000196   | 0.575 | 7.275       |
| hsa-miR-373-5p  | 4.96E-05   | 0.000222   | 0.632 | 1.054       |
| hsa-miR-29c-3p  | 5.08E-05   | 0.000227   | 0.614 | 1.268       |
| hsa-miR-488-5p  | 5.10E-05   | 0.000227   | 0.593 | 0.969       |
| hsa-miR-1304-5p | 5.37E-05   | 0.000237   | 0.611 | 1.063       |
| hsa-miR-633     | 5.35E-05   | 0.000237   | 0.593 | 0.960       |
| hsa-miR-486-3p  | 5.56E-05   | 0.000245   | 0.627 | 0.864       |
| hsa-miR-3675-3p | 5.77E-05   | 0.000253   | 0.627 | 0.864       |
| hsa-miR-449c-3p | 6.07E-05   | 0.000265   | 0.652 | 0.909       |
| hsa-miR-4305    | 6.14E-05   | 0.000266   | 0.603 | 0.974       |
| hsa-miR-628-5p  | 6.13E-05   | 0.000266   | 0.602 | 0.892       |
| hsa-miR-450a-5p | 6.32E-05   | 0.000273   | 0.642 | 0.884       |
| hsa-miR-624-5p  | 6.65E-05   | 0.000286   | 0.613 | 0.807       |

| miRNA           | ttest_rawp | ttest_adjp | AUC   | fold_change |
|-----------------|------------|------------|-------|-------------|
| hsa-miR-4308    | 6.70E-05   | 0.000287   | 0.614 | 0.977       |
| hsa-miR-367-5p  | 6.80E-05   | 0.000290   | 0.611 | 0.952       |
| hsa-miR-92a-3p  | 6.91E-05   | 0.000294   | 0.717 | 1.229       |
| hsa-miR-374c-5p | 7.29E-05   | 0.000309   | 0.606 | 0.818       |
| hsa-miR-640     | 7.55E-05   | 0.000319   | 0.641 | 0.966       |
| hsa-miR-876-5p  | 8.05E-05   | 0.000338   | 0.603 | 0.963       |
| hsa-miR-584-5p  | 8.03E-05   | 0.000338   | 0.594 | 1.319       |
| hsa-miR-3119    | 8.45E-05   | 0.000353   | 0.612 | 0.976       |
| hsa-miR-3939    | 8.81E-05   | 0.000367   | 0.616 | 1.025       |
| hsa-miR-136-3p  | 8.90E-05   | 0.000370   | 0.612 | 0.969       |
| hsa-miR-4307    | 9.14E-05   | 0.000378   | 0.615 | 0.917       |
| hsa-miR-3189-3p | 9.27E-05   | 0.000382   | 0.609 | 1.027       |
| hsa-miR-1226-5p | 9.62E-05   | 0.000395   | 0.646 | 1.130       |
| hsa-miR-384     | 0.000105   | 0.000428   | 0.613 | 0.973       |
| hsa-miR-30a-3p  | 0.000107   | 0.000436   | 0.651 | 2.144       |
| hsa-miR-3936    | 0.000112   | 0.000454   | 0.588 | 1.019       |
| hsa-miR-32-3p   | 0.000113   | 0.000460   | 0.675 | 1.188       |
| hsa-miR-3162-5p | 0.000114   | 0.000462   | 0.633 | 0.891       |
| hsa-miR-591     | 0.000116   | 0.000467   | 0.602 | 0.976       |
| hsa-miR-181b-5p | 0.000117   | 0.000468   | 0.622 | 1.136       |
| hsa-miR-450b-3p | 0.000121   | 0.000483   | 0.611 | 0.967       |
| hsa-miR-3187-3p | 0.000123   | 0.000489   | 0.597 | 1.023       |
| hsa-miR-381-3p  | 0.000124   | 0.000494   | 0.626 | 1.083       |
| hsa-miR-3157-5p | 0.000130   | 0.000515   | 0.626 | 1.048       |
| hsa-miR-889-3p  | 0.000136   | 0.000536   | 0.610 | 0.976       |
| hsa-miR-3616-3p | 0.000136   | 0.000536   | 0.597 | 0.871       |
| hsa-miR-545-3p  | 0.000139   | 0.000544   | 0.631 | 0.972       |
| hsa-miR-511-5p  | 0.000145   | 0.000566   | 0.612 | 0.980       |
| hsa-miR-1237-3p | 0.000158   | 0.000612   | 0.620 | 0.873       |
| hsa-miR-548x-3p | 0.000158   | 0.000612   | 0.585 | 0.939       |
| hsa-miR-432-3p  | 0.000163   | 0.000627   | 0.609 | 0.980       |
| hsa-miR-369-5p  | 0.000163   | 0.000627   | 0.605 | 0.954       |
| hsa-miR-653-5p  | 0.000166   | 0.000638   | 0.591 | 0.972       |
| hsa-miR-647     | 0.000169   | 0.000648   | 0.602 | 0.955       |
| hsa-miR-34b-3p  | 0.000183   | 0.000697   | 0.650 | 0.689       |
| hsa-miR-323a-3p | 0.000183   | 0.000697   | 0.589 | 1.151       |
| hsa-miR-122-3p  | 0.000188   | 0.000712   | 0.603 | 0.954       |
| hsa-miR-380-5p  | 0.000193   | 0.000730   | 0.599 | 0.979       |
| hsa-miR-3934-5p | 0.000197   | 0.000744   | 0.620 | 1.171       |
| hsa-miR-23c     | 0.000200   | 0.000750   | 0.607 | 0.778       |
| hsa-miR-2355-5p | 0.000202   | 0.000756   | 0.578 | 1.039       |
| hsa-miR-372-3p  | 0.000203   | 0.000757   | 0.598 | 0.983       |
| hsa-miR-581     | 0.000205   | 0.000764   | 0.600 | 0.975       |
| hsa-miR-509-5p  | 0.000208   | 0.000771   | 0.629 | 1.042       |
| hsa-miR-568     | 0.000237   | 0.000871   | 0.594 | 0.972       |
| hsa-miR-4277    | 0.000237   | 0.000871   | 0.591 | 0.982       |

| <b>miRNA</b>    | <b>ttest_rawp</b> | <b>ttest_adjp</b> | <b>AUC</b> | <b>fold_change</b> |
|-----------------|-------------------|-------------------|------------|--------------------|
| hsa-miR-1260a   | 0.000236          | 0.000871          | 0.589      | 2.105              |
| hsa-miR-20a-3p  | 0.000238          | 0.000873          | 0.590      | 0.847              |
| hsa-miR-664a-5p | 0.000250          | 0.000913          | 0.618      | 1.227              |
| hsa-miR-23a-3p  | 0.000259          | 0.000941          | 0.627      | 1.212              |
| hsa-miR-744-5p  | 0.000259          | 0.000941          | 0.617      | 1.217              |
| hsa-miR-191-5p  | 0.000269          | 0.000973          | 0.606      | 1.169              |
| hsa-miR-612     | 0.000275          | 0.000990          | 0.594      | 0.978              |
| hsa-miR-597-5p  | 0.000283          | 0.001017          | 0.594      | 0.981              |
| hsa-miR-106a-3p | 0.000294          | 0.001055          | 0.594      | 0.973              |
| hsa-miR-378a-3p | 0.000300          | 0.001071          | 0.614      | 1.367              |
| hsa-miR-425-3p  | 0.000301          | 0.001071          | 0.605      | 0.773              |
| hsa-miR-135a-5p | 0.000305          | 0.001085          | 0.616      | 0.939              |
| hsa-miR-518c-3p | 0.000319          | 0.001126          | 0.598      | 0.963              |
| hsa-miR-148b-3p | 0.000319          | 0.001126          | 0.562      | 0.908              |
| hsa-miR-4304    | 0.000324          | 0.001137          | 0.623      | 1.108              |
| hsa-miR-2116-3p | 0.000323          | 0.001137          | 0.601      | 0.796              |
| hsa-miR-3681-3p | 0.000327          | 0.001144          | 0.621      | 0.952              |
| hsa-miR-654-3p  | 0.000341          | 0.001191          | 0.596      | 1.234              |
| hsa-miR-609     | 0.000347          | 0.001209          | 0.618      | 0.957              |
| hsa-miR-600     | 0.000352          | 0.001223          | 0.601      | 0.982              |
| hsa-miR-563     | 0.000357          | 0.001236          | 0.603      | 0.810              |
| hsa-miR-181c-5p | 0.000374          | 0.001290          | 0.599      | 1.140              |
| hsa-miR-145-5p  | 0.000418          | 0.001436          | 0.591      | 1.297              |
| hsa-miR-1236-3p | 0.000439          | 0.001505          | 0.592      | 0.965              |
| hsa-miR-3926    | 0.000447          | 0.001530          | 0.572      | 1.365              |
| hsa-miR-615-3p  | 0.000461          | 0.001570          | 0.598      | 0.943              |
| hsa-let-7e-3p   | 0.000469          | 0.001593          | 0.601      | 0.963              |
| hsa-miR-154-3p  | 0.000477          | 0.001617          | 0.605      | 0.973              |
| hsa-miR-3147    | 0.000500          | 0.001690          | 0.577      | 1.056              |
| hsa-miR-491-3p  | 0.000519          | 0.001749          | 0.618      | 0.829              |
| hsa-miR-3674    | 0.000524          | 0.001762          | 0.588      | 0.987              |
| hsa-miR-1247-5p | 0.000531          | 0.001780          | 0.559      | 1.029              |
| hsa-miR-214-5p  | 0.000543          | 0.001816          | 0.595      | 0.984              |
| hsa-miR-221-3p  | 0.000556          | 0.001852          | 0.626      | 0.733              |
| hsa-miR-449a    | 0.000570          | 0.001892          | 0.608      | 0.960              |
| hsa-miR-3672    | 0.000578          | 0.001916          | 0.578      | 0.974              |
| hsa-miR-507     | 0.000611          | 0.002018          | 0.602      | 0.981              |
| hsa-miR-3166    | 0.000614          | 0.002024          | 0.592      | 0.983              |
| hsa-miR-136-5p  | 0.000629          | 0.002066          | 0.607      | 0.945              |
| hsa-miR-3607-5p | 0.000633          | 0.002074          | 0.613      | 1.055              |
| hsa-let-7d-3p   | 0.000651          | 0.002129          | 0.646      | 1.055              |
| hsa-miR-3136-5p | 0.000654          | 0.002132          | 0.575      | 0.961              |
| hsa-miR-616-3p  | 0.000675          | 0.002194          | 0.577      | 1.018              |
| hsa-miR-320a    | 0.000683          | 0.002212          | 0.612      | 1.128              |
| hsa-miR-513b-5p | 0.000686          | 0.002219          | 0.582      | 0.796              |
| hsa-miR-3144-3p | 0.000693          | 0.002233          | 0.585      | 0.970              |

| <b>miRNA</b>    | <b>ttest_rawp</b> | <b>ttest_adjp</b> | <b>AUC</b> | <b>fold_change</b> |
|-----------------|-------------------|-------------------|------------|--------------------|
| hsa-miR-512-5p  | 0.000708          | 0.002278          | 0.600      | 0.983              |
| hsa-miR-1260b   | 0.000714          | 0.002290          | 0.578      | 2.317              |
| hsa-miR-7-1-3p  | 0.000751          | 0.002400          | 0.594      | 1.275              |
| hsa-miR-2909    | 0.000768          | 0.002447          | 0.588      | 0.977              |
| hsa-miR-676-3p  | 0.000783          | 0.002490          | 0.597      | 0.981              |
| hsa-miR-599     | 0.000790          | 0.002506          | 0.588      | 0.982              |
| hsa-miR-921     | 0.000793          | 0.002508          | 0.598      | 1.034              |
| hsa-miR-634     | 0.000812          | 0.002548          | 0.615      | 0.906              |
| hsa-miR-1229-3p | 0.000812          | 0.002548          | 0.605      | 0.933              |
| hsa-miR-513c-5p | 0.000810          | 0.002548          | 0.573      | 0.885              |
| hsa-miR-423-3p  | 0.000815          | 0.002549          | 0.607      | 1.149              |
| hsa-miR-4320    | 0.000825          | 0.002574          | 0.601      | 0.982              |
| hsa-miR-3142    | 0.000834          | 0.002595          | 0.581      | 0.981              |
| hsa-miR-146b-5p | 0.000836          | 0.002596          | 0.600      | 0.783              |
| hsa-miR-376a-5p | 0.000873          | 0.002703          | 0.577      | 1.074              |
| hsa-miR-375     | 0.000875          | 0.002703          | 0.561      | 0.686              |
| hsa-miR-504-5p  | 0.000894          | 0.002755          | 0.591      | 0.980              |
| hsa-miR-1470    | 0.000903          | 0.002775          | 0.600      | 0.914              |
| hsa-miR-1224-3p | 0.000916          | 0.002807          | 0.585      | 0.967              |
| hsa-miR-3202    | 0.000939          | 0.002871          | 0.638      | 1.600              |
| hsa-miR-346     | 0.000975          | 0.002972          | 0.612      | 0.963              |
| hsa-miR-521     | 0.000989          | 0.003009          | 0.581      | 0.953              |
| hsa-miR-150-5p  | 0.001008          | 0.003040          | 0.621      | 1.347              |
| hsa-miR-553     | 0.001010          | 0.003040          | 0.598      | 0.969              |
| hsa-miR-548u    | 0.001007          | 0.003040          | 0.586      | 0.970              |
| hsa-miR-802     | 0.001007          | 0.003040          | 0.580      | 0.979              |
| hsa-miR-657     | 0.001039          | 0.003119          | 0.573      | 0.972              |
| hsa-miR-3660    | 0.001044          | 0.003126          | 0.601      | 1.018              |
| hsa-miR-892a    | 0.001064          | 0.003177          | 0.589      | 0.970              |
| hsa-miR-320e    | 0.001079          | 0.003216          | 0.613      | 1.224              |
| hsa-miR-298     | 0.001091          | 0.003241          | 0.591      | 0.977              |
| hsa-miR-659-3p  | 0.001140          | 0.003381          | 0.633      | 1.211              |
| hsa-miR-503-5p  | 0.001159          | 0.003402          | 0.608      | 1.048              |
| hsa-miR-3924    | 0.001159          | 0.003402          | 0.599      | 0.962              |
| hsa-miR-608     | 0.001155          | 0.003402          | 0.597      | 0.986              |
| hsa-miR-4309    | 0.001157          | 0.003402          | 0.582      | 0.984              |
| hsa-miR-302e    | 0.001167          | 0.003405          | 0.593      | 0.980              |
| hsa-miR-4317    | 0.001168          | 0.003405          | 0.584      | 1.139              |
| hsa-miR-146a-3p | 0.001168          | 0.003405          | 0.580      | 0.975              |
| hsa-miR-1256    | 0.001191          | 0.003462          | 0.563      | 0.972              |
| hsa-miR-520a-3p | 0.001200          | 0.003480          | 0.614      | 0.945              |
| hsa-miR-655-3p  | 0.001215          | 0.003513          | 0.594      | 0.975              |
| hsa-miR-1294    | 0.001230          | 0.003550          | 0.618      | 1.031              |
| hsa-miR-520g-3p | 0.001256          | 0.003614          | 0.608      | 0.952              |
| hsa-miR-374b-3p | 0.001262          | 0.003616          | 0.589      | 0.972              |
| hsa-miR-3170    | 0.001262          | 0.003616          | 0.586      | 0.947              |

| <b>miRNA</b>    | <b>ttest_rawp</b> | <b>ttest_adjp</b> | <b>AUC</b> | <b>fold_change</b> |
|-----------------|-------------------|-------------------|------------|--------------------|
| hsa-miR-1267    | 0.001273          | 0.003637          | 0.575      | 0.862              |
| hsa-miR-3613-5p | 0.001313          | 0.003744          | 0.601      | 0.936              |
| hsa-miR-485-3p  | 0.001326          | 0.003770          | 0.575      | 1.298              |
| hsa-miR-146a-5p | 0.001379          | 0.003913          | 0.603      | 1.218              |
| hsa-miR-518f-3p | 0.001395          | 0.003947          | 0.610      | 0.983              |
| hsa-miR-607     | 0.001478          | 0.004174          | 0.580      | 0.969              |
| hsa-miR-3180-5p | 0.001562          | 0.004398          | 0.599      | 0.902              |
| hsa-miR-1295a   | 0.001572          | 0.004416          | 0.671      | 1.035              |
| hsa-miR-628-3p  | 0.001632          | 0.004574          | 0.583      | 1.102              |
| hsa-miR-515-3p  | 0.001653          | 0.004612          | 0.594      | 0.952              |
| hsa-miR-526b-3p | 0.001650          | 0.004612          | 0.588      | 0.964              |
| hsa-miR-3664-5p | 0.001728          | 0.004809          | 0.583      | 0.984              |
| hsa-miR-302f    | 0.001741          | 0.004836          | 0.599      | 0.972              |
| hsa-miR-548q    | 0.001770          | 0.004904          | 0.587      | 0.941              |
| hsa-miR-4328    | 0.001777          | 0.004913          | 0.593      | 1.020              |
| hsa-miR-1179    | 0.001861          | 0.005133          | 0.587      | 0.977              |
| hsa-miR-636     | 0.001898          | 0.005223          | 0.588      | 0.916              |
| hsa-miR-549a    | 0.001935          | 0.005312          | 0.592      | 0.983              |
| hsa-miR-613     | 0.001986          | 0.005439          | 0.590      | 0.959              |
| hsa-miR-708-5p  | 0.002060          | 0.005628          | 0.580      | 0.981              |
| hsa-miR-519e-3p | 0.002081          | 0.005673          | 0.616      | 0.950              |
| hsa-miR-548a-5p | 0.002090          | 0.005684          | 0.611      | 0.973              |
| hsa-miR-92b-5p  | 0.002095          | 0.005685          | 0.555      | 1.018              |
| hsa-miR-320d    | 0.002167          | 0.005852          | 0.604      | 1.229              |
| hsa-miR-517c-3p | 0.002172          | 0.005852          | 0.596      | 0.975              |
| hsa-miR-22-5p   | 0.002170          | 0.005852          | 0.578      | 1.168              |
| hsa-miR-519c-3p | 0.002203          | 0.005908          | 0.588      | 0.973              |
| hsa-miR-7-2-3p  | 0.002202          | 0.005908          | 0.556      | 0.972              |
| hsa-let-7e-5p   | 0.002216          | 0.005930          | 0.602      | 1.202              |
| hsa-miR-520h    | 0.002230          | 0.005942          | 0.600      | 0.971              |
| hsa-miR-422a    | 0.002230          | 0.005942          | 0.591      | 1.024              |
| hsa-miR-449b-5p | 0.002240          | 0.005943          | 0.588      | 0.979              |
| hsa-miR-96-3p   | 0.002241          | 0.005943          | 0.574      | 0.987              |
| hsa-miR-548s    | 0.002263          | 0.005990          | 0.562      | 0.976              |
| hsa-miR-4316    | 0.002345          | 0.006191          | 0.578      | 1.013              |
| hsa-miR-32-5p   | 0.002360          | 0.006219          | 0.652      | 0.956              |
| hsa-miR-489-3p  | 0.002394          | 0.006294          | 0.586      | 0.977              |
| hsa-miR-499a-5p | 0.002420          | 0.006347          | 0.581      | 0.980              |
| hsa-miR-10b-3p  | 0.002502          | 0.006549          | 0.571      | 0.962              |
| hsa-miR-525-3p  | 0.002512          | 0.006560          | 0.572      | 0.974              |
| hsa-miR-3918    | 0.002543          | 0.006626          | 0.550      | 1.019              |
| hsa-miR-148b-5p | 0.002616          | 0.006803          | 0.570      | 1.074              |
| hsa-miR-4280    | 0.002656          | 0.006874          | 0.585      | 1.017              |
| hsa-miR-155-5p  | 0.002652          | 0.006874          | 0.578      | 0.881              |
| hsa-miR-1264    | 0.002850          | 0.007361          | 0.589      | 0.969              |
| hsa-miR-548y    | 0.002912          | 0.007506          | 0.598      | 0.964              |

| <b>miRNA</b>     | <b>ttest_rawp</b> | <b>ttest_adjp</b> | <b>AUC</b> | <b>fold_change</b> |
|------------------|-------------------|-------------------|------------|--------------------|
| hsa-miR-10a-3p   | 0.002924          | 0.007519          | 0.586      | 1.016              |
| hsa-miR-663b     | 0.003064          | 0.007845          | 0.586      | 1.015              |
| hsa-miR-487a-3p  | 0.003058          | 0.007845          | 0.572      | 1.030              |
| hsa-miR-26a-1-3p | 0.003089          | 0.007893          | 0.539      | 0.940              |
| hsa-miR-4286     | 0.003230          | 0.008235          | 0.572      | 3.121              |
| hsa-miR-412-3p   | 0.003239          | 0.008240          | 0.576      | 0.988              |
| hsa-miR-297      | 0.003272          | 0.008306          | 0.588      | 0.983              |
| hsa-miR-365a-5p  | 0.003284          | 0.008318          | 0.605      | 1.040              |
| hsa-miR-514b-3p  | 0.003318          | 0.008368          | 0.580      | 0.988              |
| hsa-miR-33b-5p   | 0.003311          | 0.008368          | 0.570      | 0.982              |
| hsa-miR-379-3p   | 0.003651          | 0.009188          | 0.578      | 0.984              |
| hsa-miR-3125     | 0.003723          | 0.009350          | 0.579      | 1.158              |
| hsa-miR-4301     | 0.003734          | 0.009358          | 0.589      | 0.981              |
| hsa-miR-302d-3p  | 0.003795          | 0.009492          | 0.568      | 0.978              |
| hsa-miR-1245a    | 0.003872          | 0.009664          | 0.575      | 0.984              |
| hsa-miR-1273a    | 0.003974          | 0.009888          | 0.586      | 0.981              |
| hsa-miR-3686     | 0.003979          | 0.009888          | 0.574      | 0.987              |
| hsa-miR-1303     | 0.003989          | 0.009892          | 0.585      | 1.028              |
| hsa-miR-449b-3p  | 0.004089          | 0.010103          | 0.604      | 0.803              |
| hsa-miR-558      | 0.004091          | 0.010103          | 0.579      | 0.987              |
| hsa-miR-33a-5p   | 0.004100          | 0.010105          | 0.583      | 0.983              |
| hsa-miR-4314     | 0.004129          | 0.010155          | 0.638      | 1.043              |
| hsa-miR-513a-3p  | 0.004272          | 0.010486          | 0.570      | 0.982              |
| hsa-miR-1539     | 0.004400          | 0.010777          | 0.582      | 0.820              |
| hsa-miR-606      | 0.004571          | 0.011149          | 0.582      | 0.984              |
| hsa-miR-29b-3p   | 0.004567          | 0.011149          | 0.566      | 1.132              |
| hsa-miR-937-3p   | 0.004624          | 0.011257          | 0.561      | 0.945              |
| hsa-miR-216a-5p  | 0.004834          | 0.011741          | 0.569      | 1.013              |
| hsa-miR-132-5p   | 0.004866          | 0.011797          | 0.580      | 0.961              |
| hsa-miR-19a-5p   | 0.004920          | 0.011881          | 0.569      | 0.981              |
| hsa-miR-548d-3p  | 0.004921          | 0.011881          | 0.559      | 0.977              |
| hsa-miR-4329     | 0.005001          | 0.012049          | 0.568      | 0.984              |
| hsa-miR-875-5p   | 0.005238          | 0.012595          | 0.571      | 0.970              |
| hsa-miR-3178     | 0.005261          | 0.012625          | 0.564      | 1.019              |
| hsa-miR-892b     | 0.005303          | 0.012699          | 0.577      | 1.109              |
| hsa-miR-320c     | 0.005331          | 0.012741          | 0.591      | 1.099              |
| hsa-miR-1204     | 0.005378          | 0.012827          | 0.576      | 0.984              |
| hsa-miR-1207-5p  | 0.005454          | 0.012983          | 0.603      | 2.659              |
| hsa-miR-603      | 0.005639          | 0.013396          | 0.569      | 0.983              |
| hsa-miR-300      | 0.005837          | 0.013838          | 0.590      | 0.974              |
| hsa-miR-4315     | 0.005881          | 0.013914          | 0.565      | 1.015              |
| hsa-miR-181d-5p  | 0.006017          | 0.014209          | 0.669      | 0.927              |
| hsa-miR-548g-3p  | 0.006138          | 0.014466          | 0.587      | 0.962              |
| hsa-miR-602      | 0.006261          | 0.014725          | 0.566      | 0.861              |
| hsa-miR-3663-5p  | 0.006333          | 0.014864          | 0.566      | 1.019              |
| hsa-miR-302c-3p  | 0.006381          | 0.014948          | 0.575      | 0.972              |



| <b>miRNA</b>    | <b>ttest_rawp</b> | <b>ttest_adjp</b> | <b>AUC</b> | <b>fold_change</b> |
|-----------------|-------------------|-------------------|------------|--------------------|
| hsa-miR-3149    | 0.006509          | 0.015189          | 0.632      | 1.212              |
| hsa-miR-575     | 0.006503          | 0.015189          | 0.565      | 1.240              |
| hsa-miR-153-3p  | 0.006599          | 0.015368          | 0.573      | 0.985              |
| hsa-miR-3139    | 0.006710          | 0.015594          | 0.568      | 0.987              |
| hsa-miR-451a    | 0.006780          | 0.015727          | 0.533      | 0.964              |
| hsa-miR-3919    | 0.006890          | 0.015952          | 0.574      | 0.985              |
| hsa-miR-564     | 0.007021          | 0.016191          | 0.592      | 0.820              |
| hsa-miR-1225-5p | 0.007008          | 0.016191          | 0.566      | 3.231              |
| hsa-miR-411-5p  | 0.007119          | 0.016385          | 0.573      | 0.986              |
| hsa-miR-524-3p  | 0.007202          | 0.016543          | 0.583      | 0.982              |
| hsa-miR-28-5p   | 0.007240          | 0.016600          | 0.598      | 1.177              |
| hsa-miR-539-5p  | 0.007303          | 0.016710          | 0.597      | 0.975              |
| hsa-miR-21-3p   | 0.007399          | 0.016897          | 0.588      | 1.120              |
| hsa-miR-1273e   | 0.007469          | 0.017024          | 0.565      | 0.875              |
| hsa-miR-940     | 0.007541          | 0.017131          | 0.585      | 1.631              |
| hsa-miR-9-3p    | 0.007559          | 0.017131          | 0.583      | 1.027              |
| hsa-miR-4267    | 0.007545          | 0.017131          | 0.558      | 1.013              |
| hsa-miR-29a-5p  | 0.007746          | 0.017522          | 0.580      | 0.964              |
| hsa-miR-676-5p  | 0.007905          | 0.017846          | 0.570      | 0.988              |
| hsa-miR-3126-5p | 0.008033          | 0.018101          | 0.574      | 1.015              |
| hsa-miR-3190-5p | 0.008155          | 0.018342          | 0.564      | 0.867              |
| hsa-miR-3200-5p | 0.008247          | 0.018513          | 0.572      | 1.129              |
| hsa-miR-769-3p  | 0.008271          | 0.018531          | 0.546      | 0.931              |
| hsa-miR-4299    | 0.008353          | 0.018679          | 0.591      | 0.754              |
| hsa-miR-148a-3p | 0.008425          | 0.018806          | 0.573      | 0.800              |
| hsa-miR-758-3p  | 0.008987          | 0.020021          | 0.558      | 1.057              |
| hsa-miR-548f-3p | 0.009044          | 0.020112          | 0.556      | 0.937              |
| hsa-miR-302a-3p | 0.009153          | 0.020316          | 0.607      | 0.961              |
| hsa-miR-651-5p  | 0.009373          | 0.020764          | 0.570      | 0.988              |
| hsa-miR-610     | 0.009553          | 0.021124          | 0.586      | 1.044              |
| hsa-miR-2116-5p | 0.009609          | 0.021207          | 0.573      | 0.988              |
| hsa-miR-122-5p  | 0.009660          | 0.021272          | 0.624      | 1.192              |
| hsa-miR-3910    | 0.009674          | 0.021272          | 0.548      | 1.014              |
| hsa-miR-3690    | 0.009725          | 0.021345          | 0.566      | 1.023              |
| hsa-miR-4295    | 0.009763          | 0.021388          | 0.566      | 0.982              |
| hsa-miR-1284    | 0.009851          | 0.021540          | 0.574      | 0.983              |
| hsa-miR-134-5p  | 0.009903          | 0.021616          | 0.597      | 1.756              |
| hsa-miR-100-3p  | 0.009982          | 0.021746          | 0.560      | 0.981              |
| hsa-miR-4273    | 0.010241          | 0.022230          | 0.584      | 0.988              |
| hsa-miR-1277-3p | 0.010234          | 0.022230          | 0.575      | 0.974              |
| hsa-miR-1249-3p | 0.010332          | 0.022385          | 0.599      | 1.487              |
| hsa-miR-3184-5p | 0.010554          | 0.022798          | 0.569      | 0.986              |
| hsa-miR-520d-3p | 0.010561          | 0.022798          | 0.559      | 0.952              |
| hsa-miR-210-3p  | 0.010704          | 0.023065          | 0.573      | 1.151              |
| hsa-miR-3929    | 0.010862          | 0.023304          | 0.571      | 0.987              |
| hsa-miR-596     | 0.010865          | 0.023304          | 0.569      | 1.016              |

| <b>miRNA</b>    | <b>ttest_rawp</b> | <b>ttest_adjp</b> | <b>AUC</b> | <b>fold_change</b> |
|-----------------|-------------------|-------------------|------------|--------------------|
| hsa-miR-2117    | 0.010874          | 0.023304          | 0.556      | 0.987              |
| hsa-miR-4327    | 0.011108          | 0.023696          | 0.616      | 6.670              |
| hsa-miR-4256    | 0.011101          | 0.023696          | 0.561      | 0.989              |
| hsa-miR-3617-5p | 0.011117          | 0.023696          | 0.550      | 1.029              |
| hsa-miR-562     | 0.011302          | 0.024047          | 0.566      | 0.985              |
| hsa-miR-4324    | 0.011430          | 0.024275          | 0.584      | 1.053              |
| hsa-miR-650     | 0.011556          | 0.024496          | 0.535      | 1.077              |
| hsa-miR-3138    | 0.011575          | 0.024496          | 0.532      | 1.323              |
| hsa-miR-518d-3p | 0.011600          | 0.024505          | 0.574      | 0.974              |
| hsa-miR-99b-3p  | 0.011713          | 0.024701          | 0.516      | 0.920              |
| hsa-miR-646     | 0.011912          | 0.025075          | 0.567      | 0.988              |
| hsa-miR-2355-3p | 0.012063          | 0.025348          | 0.593      | 1.013              |
| hsa-miR-1915-5p | 0.012168          | 0.025522          | 0.555      | 1.244              |
| hsa-miR-3681-5p | 0.012372          | 0.025904          | 0.564      | 0.985              |
| hsa-miR-3678-5p | 0.012599          | 0.026333          | 0.573      | 0.987              |
| hsa-miR-3192-5p | 0.012635          | 0.026361          | 0.577      | 1.012              |
| hsa-miR-2276-3p | 0.012759          | 0.026574          | 0.638      | 1.472              |
| hsa-miR-520f-3p | 0.013068          | 0.027169          | 0.565      | 0.959              |
| hsa-miR-3120-3p | 0.013809          | 0.028660          | 0.585      | 1.042              |
| hsa-miR-1233-3p | 0.014052          | 0.029114          | 0.547      | 1.023              |
| hsa-miR-3182    | 0.014603          | 0.030201          | 0.559      | 0.990              |
| hsa-miR-523-3p  | 0.014766          | 0.030485          | 0.563      | 0.989              |
| hsa-miR-3117-3p | 0.015009          | 0.030933          | 0.547      | 0.957              |
| hsa-miR-1261    | 0.015384          | 0.031652          | 0.562      | 0.988              |
| hsa-miR-1257    | 0.015766          | 0.032381          | 0.563      | 0.987              |
| hsa-miR-200b-5p | 0.016292          | 0.033402          | 0.561      | 1.015              |
| hsa-miR-193b-3p | 0.016481          | 0.033731          | 0.559      | 1.069              |
| hsa-miR-4297    | 0.016847          | 0.034421          | 0.573      | 0.981              |
| hsa-miR-342-5p  | 0.017335          | 0.035357          | 0.567      | 1.119              |
| hsa-miR-1270    | 0.017428          | 0.035486          | 0.611      | 1.041              |
| hsa-miR-1197    | 0.017518          | 0.035583          | 0.591      | 0.986              |
| hsa-miR-3198    | 0.017536          | 0.035583          | 0.567      | 1.166              |
| hsa-miR-488-3p  | 0.017570          | 0.035590          | 0.552      | 0.985              |
| hsa-miR-197-3p  | 0.017745          | 0.035884          | 0.568      | 0.883              |
| hsa-miR-323b-5p | 0.018175          | 0.036691          | 0.554      | 1.013              |
| hsa-miR-567     | 0.018473          | 0.037230          | 0.555      | 0.987              |
| hsa-miR-1291    | 0.018695          | 0.037613          | 0.611      | 1.049              |
| hsa-miR-4322    | 0.018900          | 0.037960          | 0.574      | 2.242              |
| hsa-miR-644a    | 0.019061          | 0.038220          | 0.569      | 0.990              |
| hsa-miR-518a-5p | 0.019145          | 0.038322          | 0.553      | 0.981              |
| hsa-miR-3937    | 0.019182          | 0.038331          | 0.565      | 3.030              |
| hsa-miR-548h-5p | 0.019386          | 0.038675          | 0.561      | 0.986              |
| hsa-miR-125a-3p | 0.019459          | 0.038754          | 0.548      | 0.807              |
| hsa-miR-520a-5p | 0.019676          | 0.039048          | 0.566      | 0.987              |
| hsa-miR-105-3p  | 0.019687          | 0.039048          | 0.564      | 0.981              |
| hsa-miR-622     | 0.019706          | 0.039048          | 0.555      | 1.377              |

| <b>miRNA</b>      | <b>ttest_rawp</b> | <b>ttest_adjp</b> | <b>AUC</b> | <b>fold_change</b> |
|-------------------|-------------------|-------------------|------------|--------------------|
| hsa-miR-626       | 0.019753          | 0.039077          | 0.559      | 0.985              |
| hsa-miR-3912-3p   | 0.019922          | 0.039345          | 0.567      | 0.987              |
| hsa-miR-363-5p    | 0.020103          | 0.039637          | 0.573      | 1.027              |
| hsa-miR-193a-5p   | 0.020444          | 0.040242          | 0.585      | 1.048              |
| hsa-miR-520c-3p   | 0.020481          | 0.040248          | 0.575      | 0.970              |
| hsa-miR-548b-3p   | 0.020682          | 0.040525          | 0.566      | 0.972              |
| hsa-miR-1248      | 0.020691          | 0.040525          | 0.553      | 1.012              |
| hsa-miR-891b      | 0.020885          | 0.040839          | 0.575      | 0.986              |
| hsa-miR-875-3p    | 0.021118          | 0.041225          | 0.564      | 1.012              |
| hsa-miR-125b-1-3p | 0.021292          | 0.041496          | 0.551      | 0.956              |
| hsa-miR-514b-5p   | 0.021777          | 0.042372          | 0.601      | 1.239              |
| hsa-miR-192-3p    | 0.021874          | 0.042491          | 0.557      | 1.080              |
| hsa-miR-570-3p    | 0.021952          | 0.042572          | 0.571      | 0.983              |
| hsa-miR-302d-5p   | 0.022181          | 0.042945          | 0.566      | 0.991              |
| hsa-miR-944       | 0.022552          | 0.043594          | 0.557      | 0.988              |
| hsa-miR-3648      | 0.023004          | 0.044347          | 0.597      | 9.123              |
| hsa-miR-3159      | 0.023017          | 0.044347          | 0.566      | 0.990              |
| hsa-miR-135b-3p   | 0.023568          | 0.045334          | 0.569      | 1.013              |
| hsa-miR-548p      | 0.024481          | 0.047014          | 0.549      | 0.978              |
| hsa-miR-3171      | 0.024813          | 0.047576          | 0.561      | 0.975              |
| hsa-miR-22-3p     | 0.024919          | 0.047701          | 0.602      | 1.089              |
| hsa-miR-3195      | 0.025182          | 0.048127          | 0.561      | 3.595              |
| hsa-miR-1183      | 0.025455          | 0.048452          | 0.580      | 1.556              |
| hsa-miR-924       | 0.025495          | 0.048452          | 0.570      | 0.978              |
| hsa-miR-4262      | 0.025557          | 0.048452          | 0.567      | 0.989              |
| hsa-miR-29b-2-5p  | 0.025522          | 0.048452          | 0.558      | 0.968              |
| hsa-miR-218-5p    | 0.025437          | 0.048452          | 0.525      | 1.140              |
| hsa-miR-186-3p    | 0.026186          | 0.049565          | 0.568      | 1.016              |
| hsa-miR-320b      | 0.026410          | 0.049908          | 0.596      | 1.027              |
| hsa-miR-759       | 0.026483          | 0.049967          | 0.551      | 0.990              |
| hsa-miR-1200      | 0.027521          | 0.051842          | 0.562      | 0.989              |
| hsa-miR-550a-5p   | 0.027723          | 0.052140          | 0.555      | 0.843              |
| hsa-miR-1827      | 0.027888          | 0.052367          | 0.545      | 0.980              |
| hsa-miR-132-3p    | 0.027947          | 0.052395          | 0.593      | 1.126              |
| hsa-miR-302b-3p   | 0.028208          | 0.052801          | 0.581      | 0.974              |
| hsa-miR-1227-3p   | 0.028433          | 0.053138          | 0.553      | 0.929              |
| hsa-miR-519b-3p   | 0.028542          | 0.053257          | 0.576      | 0.979              |
| hsa-miR-99a-3p    | 0.028792          | 0.053640          | 0.569      | 0.989              |
| hsa-miR-1468-5p   | 0.029039          | 0.054014          | 0.562      | 0.990              |
| hsa-miR-660-5p    | 0.029220          | 0.054265          | 0.539      | 0.926              |
| hsa-miR-18b-3p    | 0.029554          | 0.054800          | 0.556      | 0.993              |
| hsa-miR-508-5p    | 0.029621          | 0.054839          | 0.570      | 0.988              |
| hsa-miR-544a      | 0.029962          | 0.055383          | 0.571      | 0.980              |
| hsa-miR-3649      | 0.030055          | 0.055468          | 0.567      | 0.991              |
| hsa-miR-4296      | 0.030190          | 0.055613          | 0.559      | 1.020              |
| hsa-miR-621       | 0.030227          | 0.055613          | 0.557      | 0.990              |

| <b>miRNA</b>     | <b>ttest_rawp</b> | <b>ttest_adjp</b> | <b>AUC</b> | <b>fold_change</b> |
|------------------|-------------------|-------------------|------------|--------------------|
| hsa-miR-223-3p   | 0.030311          | 0.055680          | 0.637      | 1.134              |
| hsa-miR-1293     | 0.030421          | 0.055796          | 0.556      | 1.011              |
| hsa-miR-586      | 0.030701          | 0.056049          | 0.567      | 0.985              |
| hsa-miR-577      | 0.030692          | 0.056049          | 0.539      | 0.985              |
| hsa-miR-200c-3p  | 0.030667          | 0.056049          | 0.539      | 1.174              |
| hsa-miR-4271     | 0.031202          | 0.056876          | 0.569      | 1.357              |
| hsa-miR-330-5p   | 0.031350          | 0.057056          | 0.550      | 1.015              |
| hsa-miR-1231     | 0.031443          | 0.057139          | 0.559      | 1.010              |
| hsa-miR-3150b-3p | 0.032474          | 0.058921          | 0.558      | 1.012              |
| hsa-miR-217      | 0.033668          | 0.060994          | 0.557      | 0.990              |
| hsa-miR-4263     | 0.033878          | 0.061281          | 0.540      | 0.989              |
| hsa-miR-141-3p   | 0.034111          | 0.061609          | 0.536      | 1.307              |
| hsa-miR-1243     | 0.034603          | 0.062401          | 0.559      | 0.988              |
| hsa-miR-423-5p   | 0.035172          | 0.063331          | 0.579      | 1.183              |
| hsa-miR-338-5p   | 0.035331          | 0.063521          | 0.533      | 0.928              |
| hsa-miR-877-5p   | 0.035698          | 0.064084          | 0.555      | 1.369              |
| hsa-miR-579-3p   | 0.035964          | 0.064463          | 0.550      | 0.988              |
| hsa-miR-335-3p   | 0.036095          | 0.064599          | 0.537      | 0.823              |
| hsa-miR-3169     | 0.036675          | 0.065539          | 0.550      | 1.009              |
| hsa-miR-143-3p   | 0.036809          | 0.065679          | 0.544      | 0.962              |
| hsa-miR-642a-5p  | 0.036958          | 0.065845          | 0.562      | 0.988              |
| hsa-miR-129-5p   | 0.037038          | 0.065859          | 0.577      | 1.011              |
| hsa-miR-555      | 0.037077          | 0.065859          | 0.548      | 0.988              |
| hsa-miR-19b-2-5p | 0.039091          | 0.069333          | 0.565      | 0.978              |
| hsa-miR-542-5p   | 0.039694          | 0.070297          | 0.564      | 1.063              |
| hsa-miR-222-3p   | 0.041050          | 0.072589          | 0.520      | 0.922              |
| hsa-miR-3181     | 0.041229          | 0.072798          | 0.538      | 1.021              |
| hsa-miR-369-3p   | 0.041305          | 0.072822          | 0.536      | 0.974              |
| hsa-miR-3689a-5p | 0.042337          | 0.074530          | 0.558      | 1.010              |
| hsa-miR-130a-5p  | 0.043360          | 0.076218          | 0.560      | 0.986              |
| hsa-miR-3938     | 0.043438          | 0.076242          | 0.527      | 1.893              |
| hsa-miR-3116     | 0.044983          | 0.078837          | 0.552      | 0.992              |
| hsa-miR-301b-3p  | 0.045173          | 0.079052          | 0.550      | 0.984              |
| hsa-miR-208b-3p  | 0.045779          | 0.079995          | 0.550      | 0.990              |
| hsa-miR-3152-3p  | 0.045954          | 0.080182          | 0.509      | 1.674              |
| hsa-miR-3131     | 0.046163          | 0.080428          | 0.555      | 1.127              |
| hsa-miR-3622a-3p | 0.046828          | 0.081467          | 0.541      | 0.976              |
| hsa-miR-3943     | 0.047460          | 0.082445          | 0.552      | 0.985              |
| hsa-miR-3186-3p  | 0.047636          | 0.082630          | 0.554      | 1.013              |
| hsa-miR-3675-5p  | 0.047807          | 0.082804          | 0.550      | 0.991              |
| hsa-miR-1228-5p  | 0.048578          | 0.084018          | 0.538      | 1.047              |
| hsa-miR-376c-3p  | 0.048722          | 0.084143          | 0.569      | 1.054              |
| hsa-miR-3610     | 0.048910          | 0.084278          | 0.589      | 1.783              |
| hsa-miR-4276     | 0.048942          | 0.084278          | 0.561      | 0.991              |
| hsa-miR-888-5p   | 0.049418          | 0.084973          | 0.545      | 0.991              |
| hsa-miR-632      | 0.052096          | 0.089447          | 0.556      | 0.989              |

| <b>miRNA</b>     | <b>ttest_rawp</b> | <b>ttest_adjp</b> | <b>AUC</b> | <b>fold_change</b> |
|------------------|-------------------|-------------------|------------|--------------------|
| hsa-miR-24-1-5p  | 0.052289          | 0.089648          | 0.564      | 1.016              |
| hsa-miR-590-5p   | 0.052969          | 0.090683          | 0.564      | 0.934              |
| hsa-miR-1273d    | 0.053596          | 0.091491          | 0.582      | 1.084              |
| hsa-miR-3150a-3p | 0.053560          | 0.091491          | 0.557      | 1.009              |
| hsa-miR-145-3p   | 0.054510          | 0.092918          | 0.550      | 0.977              |
| hsa-miR-3160-3p  | 0.055231          | 0.094013          | 0.558      | 0.991              |
| hsa-miR-4311     | 0.055384          | 0.094138          | 0.528      | 1.019              |
| hsa-miR-3194-5p  | 0.055472          | 0.094151          | 0.593      | 3.929              |
| hsa-miR-943      | 0.055671          | 0.094213          | 0.578      | 0.988              |
| hsa-miR-542-3p   | 0.055717          | 0.094213          | 0.550      | 0.968              |
| hsa-miR-508-3p   | 0.055750          | 0.094213          | 0.549      | 1.009              |
| hsa-miR-891a-5p  | 0.055827          | 0.094213          | 0.549      | 1.012              |
| hsa-miR-302b-5p  | 0.056264          | 0.094816          | 0.561      | 0.988              |
| hsa-miR-744-3p   | 0.056910          | 0.095768          | 0.574      | 1.023              |
| hsa-miR-129-1-3p | 0.057342          | 0.096357          | 0.565      | 0.954              |
| hsa-miR-3168     | 0.057567          | 0.096462          | 0.546      | 0.991              |
| hsa-miR-1973     | 0.057502          | 0.096462          | 0.543      | 1.295              |
| hsa-miR-518f-5p  | 0.057878          | 0.096845          | 0.569      | 0.991              |
| hsa-miR-3941     | 0.057961          | 0.096847          | 0.547      | 0.990              |
| hsa-miR-1263     | 0.058268          | 0.097223          | 0.568      | 0.992              |
| hsa-miR-548i     | 0.059116          | 0.098498          | 0.551      | 0.989              |
| hsa-miR-3657     | 0.061813          | 0.102704          | 0.544      | 0.986              |
| hsa-miR-652-3p   | 0.061759          | 0.102704          | 0.527      | 0.957              |
| hsa-miR-605-5p   | 0.062036          | 0.102929          | 0.542      | 0.978              |
| hsa-miR-624-3p   | 0.063340          | 0.104946          | 0.554      | 0.990              |
| hsa-miR-3683     | 0.063787          | 0.105520          | 0.545      | 0.991              |
| hsa-miR-2277-5p  | 0.063865          | 0.105520          | 0.544      | 1.010              |
| hsa-miR-25-5p    | 0.064817          | 0.106944          | 0.547      | 1.014              |
| hsa-miR-3944-3p  | 0.065053          | 0.107183          | 0.551      | 0.991              |
| hsa-miR-30b-3p   | 0.065653          | 0.108021          | 0.528      | 0.973              |
| hsa-miR-574-3p   | 0.066099          | 0.108605          | 0.547      | 1.152              |
| hsa-miR-338-3p   | 0.067763          | 0.111031          | 0.548      | 0.761              |
| hsa-miR-3611     | 0.067682          | 0.111031          | 0.529      | 1.016              |
| hsa-miR-2114-3p  | 0.068460          | 0.112017          | 0.562      | 0.991              |
| hsa-miR-935      | 0.071663          | 0.116935          | 0.561      | 0.989              |
| hsa-miR-3917     | 0.071645          | 0.116935          | 0.547      | 1.092              |
| hsa-miR-4272     | 0.072465          | 0.118079          | 0.538      | 0.990              |
| hsa-miR-4274     | 0.073655          | 0.119854          | 0.612      | 1.171              |
| hsa-miR-1184     | 0.074636          | 0.121283          | 0.559      | 0.990              |
| hsa-miR-3908     | 0.075700          | 0.122535          | 0.554      | 0.989              |
| hsa-miR-1258     | 0.075713          | 0.122535          | 0.549      | 0.991              |
| hsa-miR-3185     | 0.075717          | 0.122535          | 0.543      | 1.011              |
| hsa-miR-224-5p   | 0.076242          | 0.123216          | 0.549      | 0.918              |
| hsa-miR-4303     | 0.076538          | 0.123357          | 0.546      | 1.008              |
| hsa-miR-661      | 0.076478          | 0.123357          | 0.539      | 0.992              |
| hsa-miR-885-5p   | 0.077283          | 0.124388          | 0.555      | 0.927              |

| miRNA             | ttest_rawp | ttest_adjp | AUC   | fold_change |
|-------------------|------------|------------|-------|-------------|
| hsa-miR-3156-5p   | 0.077971   | 0.125326   | 0.545 | 1.077       |
| hsa-miR-551a      | 0.078401   | 0.125845   | 0.539 | 0.988       |
| hsa-miR-127-3p    | 0.078898   | 0.126473   | 0.534 | 1.082       |
| hsa-miR-566       | 0.079032   | 0.126515   | 0.504 | 1.087       |
| hsa-miR-219a-2-3p | 0.080987   | 0.129469   | 0.553 | 0.992       |
| hsa-miR-3677-3p   | 0.082150   | 0.131152   | 0.553 | 1.018       |
| hsa-miR-1185-5p   | 0.083010   | 0.132346   | 0.555 | 0.989       |
| hsa-miR-614       | 0.083331   | 0.132637   | 0.549 | 0.990       |
| hsa-miR-548a-3p   | 0.083417   | 0.132637   | 0.544 | 0.988       |
| hsa-miR-103b      | 0.084137   | 0.133602   | 0.552 | 1.019       |
| hsa-miR-15b-3p    | 0.084864   | 0.134577   | 0.561 | 1.069       |
| hsa-miR-1914-3p   | 0.085276   | 0.135048   | 0.557 | 1.006       |
| hsa-miR-873-5p    | 0.087383   | 0.138054   | 0.555 | 0.989       |
| hsa-miR-4268      | 0.087407   | 0.138054   | 0.545 | 0.993       |
| hsa-miR-182-5p    | 0.087915   | 0.138671   | 0.529 | 0.914       |
| hsa-miR-3925-5p   | 0.088830   | 0.139928   | 0.520 | 0.970       |
| hsa-miR-611       | 0.089033   | 0.140061   | 0.539 | 1.009       |
| hsa-miR-29a-3p    | 0.089393   | 0.140069   | 0.572 | 1.068       |
| hsa-miR-492       | 0.089233   | 0.140069   | 0.541 | 0.991       |
| hsa-miR-1913      | 0.089339   | 0.140069   | 0.516 | 1.018       |
| hsa-miR-3130-3p   | 0.089593   | 0.140197   | 0.551 | 1.008       |
| hsa-miR-205-5p    | 0.090018   | 0.140675   | 0.631 | 1.019       |
| hsa-miR-141-5p    | 0.090711   | 0.141572   | 0.552 | 0.992       |
| hsa-miR-3606-5p   | 0.092020   | 0.143426   | 0.541 | 0.983       |
| hsa-miR-3659      | 0.092367   | 0.143777   | 0.534 | 1.027       |
| hsa-miR-3620-3p   | 0.095249   | 0.148068   | 0.598 | 1.033       |
| hsa-miR-211-5p    | 0.095912   | 0.148903   | 0.523 | 0.956       |
| hsa-miR-548aa     | 0.096049   | 0.148920   | 0.521 | 1.162       |
| hsa-miR-10b-5p    | 0.096981   | 0.150168   | 0.562 | 5.617       |
| hsa-miR-3618      | 0.098273   | 0.151970   | 0.538 | 0.992       |
| hsa-miR-4281      | 0.099223   | 0.153039   | 0.586 | 3.585       |
| hsa-miR-4264      | 0.099104   | 0.153039   | 0.542 | 0.992       |
| hsa-miR-3940-3p   | 0.100457   | 0.154741   | 0.560 | 1.028       |
| hsa-miR-3650      | 0.101740   | 0.156512   | 0.543 | 0.991       |
| hsa-miR-3164      | 0.103093   | 0.158388   | 0.543 | 0.988       |
| hsa-miR-499a-3p   | 0.104029   | 0.159618   | 0.553 | 0.989       |
| hsa-miR-520e      | 0.104211   | 0.159691   | 0.555 | 0.982       |
| hsa-miR-3144-5p   | 0.104609   | 0.160094   | 0.536 | 0.992       |
| hsa-miR-505-5p    | 0.105037   | 0.160541   | 0.546 | 0.936       |
| hsa-miR-3126-3p   | 0.105602   | 0.161197   | 0.538 | 0.992       |
| hsa-miR-149-3p    | 0.106154   | 0.161687   | 0.544 | 1.032       |
| hsa-miR-206       | 0.106197   | 0.161687   | 0.528 | 1.017       |
| hsa-miR-623       | 0.106611   | 0.162108   | 0.533 | 1.186       |
| hsa-miR-3692-3p   | 0.107346   | 0.163018   | 0.531 | 0.993       |
| hsa-miR-196a-5p   | 0.108021   | 0.163831   | 0.551 | 0.990       |
| hsa-miR-938       | 0.108669   | 0.164603   | 0.536 | 0.989       |

| <b>miRNA</b>     | <b>ttest_rawp</b> | <b>ttest_adjp</b> | <b>AUC</b> | <b>fold_change</b> |
|------------------|-------------------|-------------------|------------|--------------------|
| hsa-miR-139-5p   | 0.108925          | 0.164781          | 0.565      | 1.025              |
| hsa-miR-761      | 0.109396          | 0.165281          | 0.534      | 1.008              |
| hsa-miR-150-3p   | 0.109736          | 0.165584          | 0.549      | 6.377              |
| hsa-miR-424-3p   | 0.111206          | 0.167207          | 0.610      | 1.028              |
| hsa-miR-194-3p   | 0.111156          | 0.167207          | 0.543      | 0.991              |
| hsa-miR-1-3p     | 0.111236          | 0.167207          | 0.517      | 0.980              |
| hsa-miR-92a-2-5p | 0.111422          | 0.167274          | 0.550      | 0.989              |
| hsa-miR-3605-5p  | 0.112853          | 0.169208          | 0.593      | 1.017              |
| hsa-miR-377-5p   | 0.117336          | 0.175707          | 0.538      | 1.011              |
| hsa-miR-185-3p   | 0.117565          | 0.175827          | 0.537      | 0.989              |
| hsa-miR-658      | 0.120140          | 0.179451          | 0.547      | 0.991              |
| hsa-miR-3165     | 0.122704          | 0.183051          | 0.524      | 1.008              |
| hsa-miR-34c-5p   | 0.123393          | 0.183846          | 0.544      | 0.991              |
| hsa-miR-380-3p   | 0.125005          | 0.186014          | 0.535      | 0.981              |
| hsa-miR-593-3p   | 0.125424          | 0.186403          | 0.557      | 0.991              |
| hsa-miR-498      | 0.125595          | 0.186422          | 0.539      | 1.110              |
| hsa-miR-452-5p   | 0.127015          | 0.188293          | 0.541      | 1.008              |
| hsa-miR-33a-3p   | 0.128580          | 0.190138          | 0.548      | 0.988              |
| hsa-miR-421      | 0.128517          | 0.190138          | 0.535      | 1.039              |
| hsa-miR-187-5p   | 0.128830          | 0.190269          | 0.505      | 1.569              |
| hsa-miR-509-3-5p | 0.131282          | 0.193649          | 0.569      | 1.008              |
| hsa-miR-3065-5p  | 0.132981          | 0.195667          | 0.543      | 0.993              |
| hsa-miR-3662     | 0.132872          | 0.195667          | 0.527      | 0.990              |
| hsa-miR-1182     | 0.134004          | 0.196684          | 0.564      | 1.040              |
| hsa-miR-519d-3p  | 0.133971          | 0.196684          | 0.550      | 0.978              |
| hsa-miR-30c-1-3p | 0.134178          | 0.196694          | 0.560      | 1.021              |
| hsa-miR-3942-5p  | 0.134383          | 0.196751          | 0.532      | 0.991              |
| hsa-miR-512-3p   | 0.134579          | 0.196795          | 0.557      | 1.010              |
| hsa-miR-4294     | 0.134750          | 0.196802          | 0.507      | 0.978              |
| hsa-miR-1252-5p  | 0.135361          | 0.197451          | 0.522      | 0.987              |
| hsa-miR-573      | 0.135867          | 0.197944          | 0.533      | 0.992              |
| hsa-miR-1911-3p  | 0.136592          | 0.198755          | 0.526      | 1.011              |
| hsa-miR-31-3p    | 0.136767          | 0.198766          | 0.556      | 0.993              |
| hsa-miR-629-5p   | 0.138693          | 0.200921          | 0.562      | 1.086              |
| hsa-miR-3668     | 0.138759          | 0.200921          | 0.531      | 0.989              |
| hsa-miR-518a-3p  | 0.138644          | 0.200921          | 0.529      | 0.984              |
| hsa-miR-718      | 0.139232          | 0.201113          | 0.581      | 2.863              |
| hsa-miR-218-1-3p | 0.139140          | 0.201113          | 0.534      | 1.007              |
| hsa-miR-601      | 0.139843          | 0.201750          | 0.518      | 1.069              |
| hsa-miR-3133     | 0.141341          | 0.203414          | 0.561      | 1.011              |
| hsa-miR-885-3p   | 0.141283          | 0.203414          | 0.533      | 1.007              |
| hsa-miR-545-5p   | 0.142176          | 0.204367          | 0.529      | 0.989              |
| hsa-miR-432-5p   | 0.142562          | 0.204673          | 0.507      | 0.949              |
| hsa-miR-409-5p   | 0.142853          | 0.204842          | 0.538      | 1.028              |
| hsa-miR-3614-5p  | 0.143198          | 0.205089          | 0.533      | 0.932              |
| hsa-miR-105-5p   | 0.144920          | 0.207212          | 0.541      | 0.993              |

| <b>miRNA</b>     | <b>ttest_rawp</b> | <b>ttest_adjp</b> | <b>AUC</b> | <b>fold_change</b> |
|------------------|-------------------|-------------------|------------|--------------------|
| hsa-miR-3682-3p  | 0.145031          | 0.207212          | 0.521      | 0.968              |
| hsa-miR-592      | 0.145745          | 0.207981          | 0.542      | 0.993              |
| hsa-miR-588      | 0.146588          | 0.208932          | 0.535      | 1.009              |
| hsa-miR-299-3p   | 0.146941          | 0.209183          | 0.526      | 1.007              |
| hsa-miR-370-3p   | 0.148989          | 0.211651          | 0.617      | 1.016              |
| hsa-miR-3654     | 0.149032          | 0.211651          | 0.583      | 1.013              |
| hsa-miR-874-3p   | 0.150532          | 0.213268          | 0.552      | 1.058              |
| hsa-miR-129-2-3p | 0.150438          | 0.213268          | 0.537      | 1.037              |
| hsa-miR-218-2-3p | 0.151558          | 0.214465          | 0.521      | 0.979              |
| hsa-miR-4278     | 0.153188          | 0.216513          | 0.541      | 0.993              |
| hsa-miR-3680-5p  | 0.154194          | 0.217674          | 0.539      | 0.994              |
| hsa-miR-519e-5p  | 0.155616          | 0.219420          | 0.534      | 1.014              |
| hsa-miR-1972     | 0.156762          | 0.220510          | 0.542      | 1.894              |
| hsa-miR-3180     | 0.156604          | 0.220510          | 0.526      | 1.006              |
| hsa-miR-1307-3p  | 0.158950          | 0.223057          | 0.540      | 0.919              |
| hsa-miR-1302     | 0.158803          | 0.223057          | 0.517      | 0.989              |
| hsa-miR-762      | 0.161806          | 0.226797          | 0.531      | 4.569              |
| hsa-miR-3141     | 0.163899          | 0.229458          | 0.506      | 2.809              |
| hsa-miR-637      | 0.164136          | 0.229519          | 0.558      | 0.992              |
| hsa-miR-382-5p   | 0.164830          | 0.230218          | 0.541      | 1.036              |
| hsa-miR-3666     | 0.167880          | 0.234201          | 0.521      | 0.992              |
| hsa-miR-100-5p   | 0.171305          | 0.238697          | 0.570      | 1.519              |
| hsa-miR-920      | 0.172816          | 0.240519          | 0.531      | 1.006              |
| hsa-miR-124-5p   | 0.173479          | 0.241158          | 0.542      | 0.993              |
| hsa-miR-643      | 0.174285          | 0.241995          | 0.526      | 0.991              |
| hsa-miR-4266     | 0.175039          | 0.242756          | 0.537      | 0.994              |
| hsa-miR-513a-5p  | 0.179870          | 0.249164          | 0.529      | 0.723              |
| hsa-miR-4289     | 0.180287          | 0.249449          | 0.547      | 0.994              |
| hsa-miR-200b-3p  | 0.185899          | 0.256915          | 0.628      | 2.233              |
| hsa-miR-30d-3p   | 0.186235          | 0.257079          | 0.549      | 1.007              |
| hsa-miR-3671     | 0.187992          | 0.259201          | 0.530      | 0.993              |
| hsa-miR-452-3p   | 0.189675          | 0.261217          | 0.524      | 1.007              |
| hsa-miR-367-3p   | 0.190465          | 0.262000          | 0.541      | 0.991              |
| hsa-miR-578      | 0.192988          | 0.265162          | 0.530      | 0.993              |
| hsa-miR-4259     | 0.194302          | 0.266658          | 0.519      | 1.110              |
| hsa-miR-3167     | 0.194722          | 0.266713          | 0.540      | 0.994              |
| hsa-miR-3945     | 0.194793          | 0.266713          | 0.536      | 1.114              |
| hsa-miR-222-5p   | 0.195069          | 0.266782          | 0.535      | 0.994              |
| hsa-miR-3074-3p  | 0.195962          | 0.267695          | 0.507      | 0.975              |
| hsa-miR-1224-5p  | 0.197391          | 0.269335          | 0.546      | 1.337              |
| hsa-miR-3914     | 0.199060          | 0.271300          | 0.531      | 1.008              |
| hsa-miR-212-3p   | 0.203817          | 0.277463          | 0.514      | 1.078              |
| hsa-miR-4300     | 0.204758          | 0.278424          | 0.524      | 0.994              |
| hsa-miR-483-5p   | 0.206196          | 0.280058          | 0.518      | 1.810              |
| hsa-miR-922      | 0.209083          | 0.283652          | 0.536      | 0.994              |
| hsa-miR-888-3p   | 0.210384          | 0.285091          | 0.538      | 0.994              |



| <b>miRNA</b>    | <b>ttest_rawp</b> | <b>ttest_adjp</b> | <b>AUC</b> | <b>fold_change</b> |
|-----------------|-------------------|-------------------|------------|--------------------|
| hsa-miR-4251    | 0.212092          | 0.287076          | 0.542      | 1.008              |
| hsa-miR-520b    | 0.215117          | 0.290839          | 0.559      | 0.992              |
| hsa-miR-373-3p  | 0.215440          | 0.290942          | 0.543      | 0.994              |
| hsa-miR-589-5p  | 0.217374          | 0.293220          | 0.539      | 1.006              |
| hsa-miR-4321    | 0.219128          | 0.295249          | 0.515      | 0.990              |
| hsa-miR-3658    | 0.221584          | 0.298219          | 0.545      | 1.007              |
| hsa-miR-196b-3p | 0.224956          | 0.302413          | 0.540      | 0.994              |
| hsa-miR-569     | 0.225405          | 0.302672          | 0.537      | 1.008              |
| hsa-miR-541-5p  | 0.226003          | 0.303131          | 0.526      | 0.990              |
| hsa-miR-516a-3p | 0.227725          | 0.305094          | 0.551      | 0.994              |
| hsa-miR-675-5p  | 0.229148          | 0.306654          | 0.521      | 1.005              |
| hsa-miR-3155a   | 0.229705          | 0.307052          | 0.529      | 1.005              |
| hsa-miR-548v    | 0.230358          | 0.307577          | 0.539      | 0.990              |
| hsa-miR-450b-5p | 0.231142          | 0.308276          | 0.535      | 0.992              |
| hsa-miR-125a-5p | 0.232550          | 0.309805          | 0.540      | 0.988              |
| hsa-miR-3153    | 0.234234          | 0.310997          | 0.545      | 0.995              |
| hsa-miR-374a-3p | 0.233883          | 0.310997          | 0.540      | 0.992              |
| hsa-miR-1253    | 0.234157          | 0.310997          | 0.538      | 0.994              |
| hsa-miR-4282    | 0.237200          | 0.314345          | 0.532      | 1.007              |
| hsa-miR-619-3p  | 0.237287          | 0.314345          | 0.529      | 0.994              |
| hsa-miR-1265    | 0.238398          | 0.315464          | 0.522      | 1.009              |
| hsa-miR-934     | 0.240388          | 0.317388          | 0.536      | 1.006              |
| hsa-miR-1269a   | 0.240161          | 0.317388          | 0.533      | 0.995              |
| hsa-miR-604     | 0.241445          | 0.318427          | 0.524      | 1.008              |
| hsa-miR-495-3p  | 0.242418          | 0.319355          | 0.539      | 1.032              |
| hsa-miR-4302    | 0.246205          | 0.323983          | 0.533      | 0.995              |
| hsa-miR-3129-5p | 0.246822          | 0.324433          | 0.515      | 0.990              |
| hsa-miR-371a-5p | 0.248367          | 0.326102          | 0.538      | 1.004              |
| hsa-miR-526b-5p | 0.253072          | 0.331912          | 0.501      | 1.043              |
| hsa-miR-302a-5p | 0.254085          | 0.332871          | 0.526      | 0.992              |
| hsa-miR-616-5p  | 0.254633          | 0.333220          | 0.510      | 1.008              |
| hsa-miR-4279    | 0.257259          | 0.336284          | 0.524      | 1.012              |
| hsa-miR-3667-3p | 0.258059          | 0.336958          | 0.516      | 0.993              |
| hsa-miR-3148    | 0.259354          | 0.337903          | 0.593      | 1.095              |
| hsa-miR-1323    | 0.259212          | 0.337903          | 0.527      | 1.012              |
| hsa-miR-302c-5p | 0.262120          | 0.341131          | 0.555      | 0.995              |
| hsa-miR-1471    | 0.262700          | 0.341510          | 0.570      | 1.569              |
| hsa-miR-449c-5p | 0.263047          | 0.341586          | 0.545      | 0.995              |
| hsa-miR-548w    | 0.266412          | 0.345577          | 0.534      | 0.990              |
| hsa-miR-371a-3p | 0.270607          | 0.349929          | 0.554      | 1.004              |
| hsa-miR-1181    | 0.270257          | 0.349929          | 0.548      | 2.918              |
| hsa-miR-561-3p  | 0.270655          | 0.349929          | 0.525      | 0.993              |
| hsa-miR-618     | 0.271566          | 0.350724          | 0.512      | 0.992              |
| hsa-miR-711     | 0.273651          | 0.352784          | 0.578      | 1.011              |
| hsa-miR-23b-3p  | 0.273788          | 0.352784          | 0.556      | 1.119              |
| hsa-miR-4288    | 0.274056          | 0.352784          | 0.523      | 1.006              |

| <b>miRNA</b>     | <b>ttest_rawp</b> | <b>ttest_adjp</b> | <b>AUC</b> | <b>fold_change</b> |
|------------------|-------------------|-------------------|------------|--------------------|
| hsa-miR-147a     | 0.276526          | 0.355576          | 0.522      | 0.995              |
| hsa-miR-146b-3p  | 0.280083          | 0.359759          | 0.518      | 0.994              |
| hsa-miR-617      | 0.280673          | 0.360126          | 0.520      | 0.964              |
| hsa-miR-2115-3p  | 0.281302          | 0.360541          | 0.527      | 0.994              |
| hsa-miR-3622b-3p | 0.282764          | 0.362023          | 0.510      | 1.011              |
| hsa-miR-3197     | 0.284751          | 0.364173          | 0.522      | 0.990              |
| hsa-miR-3652     | 0.285954          | 0.365317          | 0.554      | 1.000              |
| hsa-miR-183-3p   | 0.287648          | 0.366802          | 0.555      | 0.900              |
| hsa-miR-767-5p   | 0.287736          | 0.366802          | 0.527      | 0.995              |
| hsa-miR-522-3p   | 0.288608          | 0.367441          | 0.537      | 0.992              |
| hsa-miR-323a-5p  | 0.288859          | 0.367441          | 0.527      | 0.995              |
| hsa-miR-494-3p   | 0.290020          | 0.368522          | 0.526      | 0.623              |
| hsa-miR-377-3p   | 0.290804          | 0.369121          | 0.535      | 1.021              |
| hsa-miR-3132     | 0.296993          | 0.376574          | 0.588      | 1.007              |
| hsa-miR-1909-5p  | 0.297521          | 0.376839          | 0.583      | 0.939              |
| hsa-miR-518e-3p  | 0.297961          | 0.376992          | 0.531      | 0.995              |
| hsa-miR-4293     | 0.298320          | 0.377044          | 0.527      | 1.005              |
| hsa-miR-3151-5p  | 0.299401          | 0.378005          | 0.512      | 1.006              |
| hsa-miR-188-5p   | 0.301296          | 0.379992          | 0.556      | 2.184              |
| hsa-miR-337-5p   | 0.301953          | 0.380415          | 0.539      | 0.994              |
| hsa-miR-3612     | 0.302729          | 0.380583          | 0.532      | 0.995              |
| hsa-miR-671-3p   | 0.302658          | 0.380583          | 0.504      | 0.974              |
| hsa-miR-4283     | 0.305612          | 0.383799          | 0.544      | 0.996              |
| hsa-miR-3679-5p  | 0.306974          | 0.385100          | 0.559      | 1.382              |
| hsa-miR-200a-3p  | 0.308278          | 0.386327          | 0.557      | 1.376              |
| hsa-miR-139-3p   | 0.308945          | 0.386753          | 0.516      | 1.026              |
| hsa-miR-3201     | 0.312747          | 0.390782          | 0.527      | 0.994              |
| hsa-miR-496      | 0.312824          | 0.390782          | 0.520      | 0.994              |
| hsa-miR-1244     | 0.317945          | 0.396761          | 0.538      | 1.006              |
| hsa-miR-3163     | 0.322986          | 0.402626          | 0.534      | 1.012              |
| hsa-miR-1251-5p  | 0.324632          | 0.404252          | 0.524      | 0.996              |
| hsa-miR-3685     | 0.325836          | 0.405325          | 0.545      | 1.007              |
| hsa-miR-1296-5p  | 0.328119          | 0.407736          | 0.531      | 0.975              |
| hsa-miR-3923     | 0.330096          | 0.409762          | 0.520      | 0.989              |
| hsa-miR-559      | 0.331802          | 0.411449          | 0.539      | 1.006              |
| hsa-miR-27b-5p   | 0.332186          | 0.411493          | 0.525      | 0.995              |
| hsa-miR-3655     | 0.333507          | 0.412697          | 0.517      | 1.005              |
| hsa-miR-625-3p   | 0.339156          | 0.419250          | 0.518      | 0.975              |
| hsa-miR-143-5p   | 0.346663          | 0.428082          | 0.529      | 0.995              |
| hsa-miR-4287     | 0.347128          | 0.428209          | 0.528      | 0.996              |
| hsa-miR-1297     | 0.349402          | 0.430565          | 0.533      | 0.996              |
| hsa-miR-1914-5p  | 0.352266          | 0.433643          | 0.525      | 0.994              |
| hsa-miR-1910-5p  | 0.353778          | 0.435052          | 0.549      | 0.999              |
| hsa-miR-137      | 0.354949          | 0.436038          | 0.528      | 0.996              |
| hsa-miR-3065-3p  | 0.360195          | 0.442023          | 0.519      | 0.996              |
| hsa-miR-1208     | 0.362191          | 0.444013          | 0.541      | 1.006              |

| <b>miRNA</b>      | <b>ttest_rawp</b> | <b>ttest_adjp</b> | <b>AUC</b> | <b>fold_change</b> |
|-------------------|-------------------|-------------------|------------|--------------------|
| hsa-miR-1321      | 0.363142          | 0.444718          | 0.547      | 1.006              |
| hsa-miR-571       | 0.363989          | 0.444834          | 0.618      | 1.004              |
| hsa-miR-101-5p    | 0.363800          | 0.444834          | 0.526      | 1.029              |
| hsa-miR-3651      | 0.370088          | 0.451821          | 0.532      | 0.916              |
| hsa-miR-1246      | 0.371423          | 0.452982          | 0.502      | 0.840              |
| hsa-miR-3622b-5p  | 0.374993          | 0.456866          | 0.540      | 1.009              |
| hsa-miR-1205      | 0.376584          | 0.458332          | 0.526      | 0.996              |
| hsa-miR-3161      | 0.378684          | 0.460415          | 0.573      | 1.009              |
| hsa-miR-199b-5p   | 0.379368          | 0.460773          | 0.534      | 0.783              |
| hsa-miR-16-2-3p   | 0.383131          | 0.463913          | 0.545      | 0.961              |
| hsa-miR-9-5p      | 0.382866          | 0.463913          | 0.524      | 0.995              |
| hsa-miR-208a-3p   | 0.383104          | 0.463913          | 0.512      | 0.996              |
| hsa-miR-411-3p    | 0.383876          | 0.464340          | 0.512      | 0.991              |
| hsa-miR-331-5p    | 0.384945          | 0.465158          | 0.527      | 1.005              |
| hsa-miR-490-3p    | 0.385488          | 0.465339          | 0.539      | 0.995              |
| hsa-miR-765       | 0.387950          | 0.467834          | 0.551      | 1.144              |
| hsa-miR-708-3p    | 0.390058          | 0.469427          | 0.533      | 0.995              |
| hsa-miR-3678-3p   | 0.390065          | 0.469427          | 0.515      | 1.004              |
| hsa-miR-766-3p    | 0.393804          | 0.473446          | 0.524      | 1.049              |
| hsa-miR-195-3p    | 0.394230          | 0.473476          | 0.536      | 0.925              |
| hsa-miR-3911      | 0.395703          | 0.474763          | 0.530      | 3.692              |
| hsa-miR-376b-3p   | 0.398447          | 0.477088          | 0.534      | 1.006              |
| hsa-miR-4257      | 0.398247          | 0.477088          | 0.509      | 1.079              |
| hsa-miR-493-3p    | 0.399095          | 0.477380          | 0.500      | 1.007              |
| hsa-miR-219a-1-3p | 0.403079          | 0.481659          | 0.525      | 0.996              |
| hsa-miR-3173-3p   | 0.409953          | 0.489379          | 0.541      | 1.005              |
| hsa-miR-580-3p    | 0.414278          | 0.494043          | 0.529      | 0.995              |
| hsa-miR-219a-5p   | 0.415462          | 0.494957          | 0.504      | 0.988              |
| hsa-miR-509-3p    | 0.419660          | 0.499455          | 0.530      | 1.004              |
| hsa-miR-1909-3p   | 0.421579          | 0.501234          | 0.529      | 0.997              |
| hsa-miR-3180-3p   | 0.424198          | 0.503841          | 0.518      | 0.678              |
| hsa-miR-299-5p    | 0.425023          | 0.504316          | 0.534      | 0.988              |
| hsa-miR-1306-3p   | 0.426655          | 0.505238          | 0.582      | 0.998              |
| hsa-miR-593-5p    | 0.426430          | 0.505238          | 0.516      | 0.996              |
| hsa-miR-516a-5p   | 0.440522          | 0.520832          | 0.521      | 1.008              |
| hsa-miR-487b-3p   | 0.440704          | 0.520832          | 0.511      | 0.956              |
| hsa-miR-34c-3p    | 0.442065          | 0.521919          | 0.528      | 1.005              |
| hsa-miR-587       | 0.442727          | 0.522180          | 0.529      | 1.004              |
| hsa-miR-620       | 0.445423          | 0.524418          | 0.525      | 0.996              |
| hsa-miR-187-3p    | 0.445511          | 0.524418          | 0.516      | 1.004              |
| hsa-miR-585-3p    | 0.449125          | 0.528146          | 0.518      | 0.996              |
| hsa-miR-635       | 0.453684          | 0.532978          | 0.520      | 0.996              |
| hsa-miR-4270      | 0.458587          | 0.538203          | 0.523      | 11.121             |
| hsa-miR-3646      | 0.474189          | 0.554979          | 0.557      | 1.047              |
| hsa-let-7g-3p     | 0.473767          | 0.554979          | 0.529      | 0.995              |
| hsa-miR-4252      | 0.474289          | 0.554979          | 0.508      | 1.015              |

| <b>miRNA</b>      | <b>ttest_rawp</b> | <b>ttest_adjp</b> | <b>AUC</b> | <b>fold_change</b> |
|-------------------|-------------------|-------------------|------------|--------------------|
| hsa-miR-3188      | 0.485784          | 0.567868          | 0.531      | 1.943              |
| hsa-miR-3123      | 0.493467          | 0.576280          | 0.519      | 0.997              |
| hsa-miR-4330      | 0.494720          | 0.577126          | 0.539      | 0.997              |
| hsa-miR-630       | 0.495167          | 0.577126          | 0.524      | 2.007              |
| hsa-miR-216b-5p   | 0.498137          | 0.580016          | 0.511      | 1.004              |
| hsa-miR-3928-3p   | 0.499526          | 0.581062          | 0.523      | 0.997              |
| hsa-miR-518b      | 0.502060          | 0.583435          | 0.505      | 0.994              |
| hsa-miR-544b      | 0.502591          | 0.583479          | 0.527      | 0.996              |
| hsa-miR-379-5p    | 0.504719          | 0.585375          | 0.527      | 1.004              |
| hsa-miR-595       | 0.512149          | 0.593411          | 0.564      | 1.063              |
| hsa-miR-106b-3p   | 0.521827          | 0.604033          | 0.522      | 0.989              |
| hsa-miR-92b-3p    | 0.527770          | 0.610094          | 0.554      | 0.980              |
| hsa-miR-135a-3p   | 0.528095          | 0.610094          | 0.530      | 1.580              |
| hsa-miR-3183      | 0.532019          | 0.614028          | 0.612      | 0.964              |
| hsa-miR-24-2-5p   | 0.533588          | 0.614958          | 0.518      | 1.003              |
| hsa-miR-3916      | 0.533865          | 0.614958          | 0.512      | 1.004              |
| hsa-miR-3614-3p   | 0.535594          | 0.616349          | 0.521      | 0.995              |
| hsa-miR-138-2-3p  | 0.538028          | 0.618550          | 0.511      | 0.976              |
| hsa-miR-3186-5p   | 0.540415          | 0.620691          | 0.526      | 0.997              |
| hsa-miR-485-5p    | 0.543190          | 0.623178          | 0.518      | 1.004              |
| hsa-miR-3143      | 0.543634          | 0.623178          | 0.501      | 0.996              |
| hsa-miR-1469      | 0.544926          | 0.624053          | 0.550      | 1.026              |
| hsa-miR-887-3p    | 0.549503          | 0.628686          | 0.519      | 0.999              |
| hsa-miR-4261      | 0.552355          | 0.630953          | 0.519      | 1.013              |
| hsa-miR-583       | 0.552550          | 0.630953          | 0.507      | 1.004              |
| hsa-miR-3935      | 0.554796          | 0.632906          | 0.501      | 0.949              |
| hsa-miR-557       | 0.555644          | 0.633263          | 0.522      | 2.589              |
| hsa-miR-1292-5p   | 0.557400          | 0.634652          | 0.511      | 1.004              |
| hsa-miR-95-3p     | 0.562547          | 0.639476          | 0.545      | 1.035              |
| hsa-miR-582-3p    | 0.562717          | 0.639476          | 0.517      | 1.004              |
| hsa-miR-548b-5p   | 0.564035          | 0.640359          | 0.532      | 0.994              |
| hsa-miR-4255      | 0.564766          | 0.640574          | 0.510      | 1.003              |
| hsa-miR-127-5p    | 0.565393          | 0.640670          | 0.511      | 1.003              |
| hsa-miR-3692-5p   | 0.566349          | 0.641139          | 0.514      | 0.989              |
| hsa-miR-181a-5p   | 0.575843          | 0.651264          | 0.504      | 1.047              |
| hsa-miR-590-3p    | 0.578222          | 0.653331          | 0.503      | 1.008              |
| hsa-miR-3134      | 0.584617          | 0.659925          | 0.506      | 0.996              |
| hsa-miR-138-5p    | 0.586904          | 0.661875          | 0.526      | 1.002              |
| hsa-miR-3622a-5p  | 0.598123          | 0.673885          | 0.506      | 0.996              |
| hsa-miR-548t-5p   | 0.601749          | 0.677326          | 0.509      | 0.994              |
| hsa-miR-198       | 0.603879          | 0.679077          | 0.536      | 1.144              |
| hsa-miR-125b-2-3p | 0.606476          | 0.681350          | 0.504      | 1.003              |
| hsa-miR-1206      | 0.611498          | 0.686339          | 0.500      | 1.003              |
| hsa-miR-138-1-3p  | 0.617491          | 0.692409          | 0.511      | 1.005              |
| hsa-miR-1305      | 0.618449          | 0.692827          | 0.521      | 0.999              |
| hsa-miR-876-3p    | 0.620251          | 0.694189          | 0.503      | 0.997              |

| <b>miRNA</b>    | <b>ttest_rawp</b> | <b>ttest_adjp</b> | <b>AUC</b> | <b>fold_change</b> |
|-----------------|-------------------|-------------------|------------|--------------------|
| hsa-miR-1203    | 0.627193          | 0.701295          | 0.514      | 1.004              |
| hsa-miR-1268a   | 0.644754          | 0.719708          | 0.551      | 1.971              |
| hsa-miR-431-3p  | 0.644877          | 0.719708          | 0.501      | 0.996              |
| hsa-miR-598-3p  | 0.649865          | 0.724591          | 0.509      | 0.988              |
| hsa-miR-323b-3p | 0.653788          | 0.727593          | 0.514      | 0.997              |
| hsa-miR-631     | 0.653374          | 0.727593          | 0.508      | 1.092              |
| hsa-miR-4269    | 0.658207          | 0.731822          | 0.524      | 0.983              |
| hsa-miR-455-3p  | 0.661342          | 0.734617          | 0.561      | 1.031              |
| hsa-miR-3616-5p | 0.664914          | 0.737893          | 0.524      | 1.002              |
| hsa-miR-1193    | 0.669189          | 0.741940          | 0.503      | 1.002              |
| hsa-miR-4258    | 0.672905          | 0.745362          | 0.523      | 0.997              |
| hsa-miR-4265    | 0.677536          | 0.746994          | 0.537      | 0.998              |
| hsa-miR-3619-5p | 0.675027          | 0.746994          | 0.512      | 1.002              |
| hsa-miR-3146    | 0.677362          | 0.746994          | 0.510      | 1.002              |
| hsa-miR-3663-3p | 0.676618          | 0.746994          | 0.500      | 57.669             |
| hsa-miR-936     | 0.675973          | 0.746994          | 0.500      | 1.016              |
| hsa-miR-325     | 0.686961          | 0.756680          | 0.520      | 1.003              |
| hsa-miR-34b-5p  | 0.690473          | 0.759842          | 0.551      | 1.058              |
| hsa-miR-1250-5p | 0.692079          | 0.760901          | 0.502      | 0.998              |
| hsa-miR-4284    | 0.694296          | 0.761923          | 0.518      | 1.000              |
| hsa-miR-3145-3p | 0.694245          | 0.761923          | 0.502      | 1.003              |
| hsa-miR-1912    | 0.701613          | 0.769238          | 0.510      | 0.998              |
| hsa-miR-1262    | 0.702996          | 0.770041          | 0.503      | 0.997              |
| hsa-miR-1287-5p | 0.703958          | 0.770381          | 0.563      | 0.993              |
| hsa-miR-670-5p  | 0.704837          | 0.770503          | 0.508      | 1.037              |
| hsa-miR-190b    | 0.705372          | 0.770503          | 0.502      | 1.004              |
| hsa-miR-518e-5p | 0.707010          | 0.771581          | 0.505      | 0.998              |
| hsa-miR-4319    | 0.710927          | 0.775140          | 0.515      | 1.002              |
| hsa-miR-205-3p  | 0.714520          | 0.778340          | 0.522      | 1.004              |
| hsa-miR-3909    | 0.715251          | 0.778419          | 0.521      | 1.002              |
| hsa-miR-133a-3p | 0.719235          | 0.782036          | 0.501      | 1.025              |
| hsa-miR-31-5p   | 0.722306          | 0.784653          | 0.519      | 1.008              |
| hsa-miR-486-5p  | 0.722972          | 0.784657          | 0.545      | 1.042              |
| hsa-miR-4291    | 0.725496          | 0.786104          | 0.511      | 0.952              |
| hsa-miR-3158-3p | 0.726963          | 0.786104          | 0.508      | 1.002              |
| hsa-miR-518c-5p | 0.726855          | 0.786104          | 0.504      | 1.002              |
| hsa-miR-3913-5p | 0.726775          | 0.786104          | 0.503      | 0.998              |
| hsa-miR-130b-3p | 0.728499          | 0.787045          | 0.544      | 1.058              |
| hsa-miR-2113    | 0.729479          | 0.787385          | 0.514      | 1.003              |
| hsa-miR-2114-5p | 0.732309          | 0.789622          | 0.503      | 0.999              |
| hsa-miR-941     | 0.732887          | 0.789622          | 0.502      | 1.002              |
| hsa-miR-2277-3p | 0.739872          | 0.796423          | 0.542      | 1.037              |
| hsa-miR-224-3p  | 0.751554          | 0.808262          | 0.519      | 0.998              |
| hsa-miR-3140-3p | 0.754239          | 0.810413          | 0.501      | 0.997              |
| hsa-miR-1290    | 0.758328          | 0.814067          | 0.569      | 0.908              |
| hsa-miR-2278    | 0.762616          | 0.817928          | 0.544      | 1.061              |

| <b>miRNA</b>     | <b>ttest_rawp</b> | <b>ttest_adjp</b> | <b>AUC</b> | <b>fold_change</b> |
|------------------|-------------------|-------------------|------------|--------------------|
| hsa-miR-1266-5p  | 0.764867          | 0.819600          | 0.517      | 0.999              |
| hsa-miR-4253     | 0.765985          | 0.820054          | 0.503      | 1.017              |
| hsa-let-7i-3p    | 0.767167          | 0.820578          | 0.502      | 0.998              |
| hsa-miR-3713     | 0.770225          | 0.822361          | 0.523      | 1.001              |
| hsa-miR-662      | 0.769545          | 0.822361          | 0.507      | 0.989              |
| hsa-miR-1226-3p  | 0.773518          | 0.825133          | 0.521      | 0.999              |
| hsa-miR-639      | 0.780025          | 0.831324          | 0.507      | 0.998              |
| hsa-miR-3199     | 0.782995          | 0.833738          | 0.519      | 1.001              |
| hsa-miR-4292     | 0.790700          | 0.841186          | 0.514      | 0.999              |
| hsa-miR-7-5p     | 0.793822          | 0.842990          | 0.523      | 0.932              |
| hsa-miR-525-5p   | 0.793746          | 0.842990          | 0.515      | 1.000              |
| hsa-miR-4325     | 0.796667          | 0.844797          | 0.508      | 1.002              |
| hsa-miR-4285     | 0.796952          | 0.844797          | 0.506      | 0.998              |
| hsa-miR-3689b-3p | 0.798033          | 0.845186          | 0.513      | 0.999              |
| hsa-miR-548l     | 0.800028          | 0.846541          | 0.506      | 1.001              |
| hsa-miR-19a-3p   | 0.803579          | 0.849539          | 0.512      | 1.033              |
| hsa-miR-1298-5p  | 0.813877          | 0.859658          | 0.506      | 1.001              |
| hsa-miR-506-3p   | 0.822444          | 0.867932          | 0.504      | 0.998              |
| hsa-miR-548d-5p  | 0.825060          | 0.869917          | 0.542      | 1.118              |
| hsa-miR-510-5p   | 0.826814          | 0.870990          | 0.511      | 1.001              |
| hsa-miR-490-5p   | 0.830051          | 0.872844          | 0.521      | 0.996              |
| hsa-miR-1322     | 0.829845          | 0.872844          | 0.504      | 1.002              |
| hsa-miR-1202     | 0.835664          | 0.877966          | 0.510      | 1.995              |
| hsa-miR-19b-1-5p | 0.839106          | 0.880800          | 0.530      | 0.992              |
| hsa-miR-203a-3p  | 0.842556          | 0.883638          | 0.559      | 1.017              |
| hsa-miR-625-5p   | 0.846087          | 0.886555          | 0.519      | 1.041              |
| hsa-miR-3661     | 0.853330          | 0.893353          | 0.511      | 1.000              |
| hsa-miR-3175     | 0.858430          | 0.897105          | 0.515      | 0.999              |
| hsa-miR-649      | 0.858073          | 0.897105          | 0.513      | 1.000              |
| hsa-miR-4260     | 0.860455          | 0.897635          | 0.504      | 1.002              |
| hsa-miR-3128     | 0.859976          | 0.897635          | 0.500      | 1.003              |
| hsa-miR-890      | 0.866271          | 0.902906          | 0.505      | 0.999              |
| hsa-miR-1275     | 0.869316          | 0.904486          | 0.524      | 1.039              |
| hsa-miR-516b-5p  | 0.868862          | 0.904486          | 0.503      | 0.999              |
| hsa-miR-383-5p   | 0.872475          | 0.906975          | 0.511      | 1.000              |
| hsa-miR-517-5p   | 0.875703          | 0.909532          | 0.506      | 0.999              |
| hsa-miR-200a-5p  | 0.876621          | 0.909686          | 0.504      | 1.001              |
| hsa-miR-517a-3p  | 0.880437          | 0.909898          | 0.536      | 1.005              |
| hsa-miR-410-3p   | 0.879169          | 0.909898          | 0.510      | 0.993              |
| hsa-miR-23b-5p   | 0.878712          | 0.909898          | 0.504      | 0.999              |
| hsa-miR-556-5p   | 0.880670          | 0.909898          | 0.503      | 1.002              |
| hsa-miR-3122     | 0.878124          | 0.909898          | 0.500      | 1.001              |
| hsa-miR-3927-3p  | 0.883355          | 0.911876          | 0.505      | 1.001              |
| hsa-miR-552-3p   | 0.885315          | 0.913102          | 0.513      | 1.001              |
| hsa-miR-3115     | 0.888300          | 0.915382          | 0.500      | 1.002              |
| hsa-miR-497-3p   | 0.890122          | 0.916461          | 0.506      | 0.999              |

| <b>miRNA</b>     | <b>ttest_rawp</b> | <b>ttest_adjp</b> | <b>AUC</b> | <b>fold_change</b> |
|------------------|-------------------|-------------------|------------|--------------------|
| hsa-miR-668-3p   | 0.891345          | 0.916923          | 0.503      | 0.998              |
| hsa-miR-296-3p   | 0.900100          | 0.925124          | 0.503      | 1.001              |
| hsa-miR-147b     | 0.902142          | 0.926418          | 0.504      | 1.001              |
| hsa-miR-514a-3p  | 0.903923          | 0.927443          | 0.505      | 1.001              |
| hsa-miR-1254     | 0.910639          | 0.931908          | 0.554      | 0.996              |
| hsa-miR-4298     | 0.910305          | 0.931908          | 0.520      | 5.176              |
| hsa-miR-200c-5p  | 0.909490          | 0.931908          | 0.506      | 1.001              |
| hsa-miR-3714     | 0.913630          | 0.934161          | 0.532      | 1.001              |
| hsa-miR-663a     | 0.914770          | 0.934518          | 0.536      | 1.987              |
| hsa-miR-1538     | 0.918168          | 0.937181          | 0.542      | 1.003              |
| hsa-miR-92a-1-5p | 0.925953          | 0.943661          | 0.526      | 0.998              |
| hsa-miR-20b-3p   | 0.926112          | 0.943661          | 0.501      | 1.000              |
| hsa-miR-3689a-3p | 0.931143          | 0.947824          | 0.509      | 1.000              |
| hsa-miR-2052     | 0.931800          | 0.947824          | 0.507      | 0.999              |
| hsa-miR-3137     | 0.932861          | 0.948088          | 0.512      | 0.988              |
| hsa-miR-30c-2-3p | 0.939252          | 0.953764          | 0.522      | 1.011              |
| hsa-miR-645      | 0.941098          | 0.954818          | 0.505      | 0.999              |
| hsa-miR-541-3p   | 0.941943          | 0.954857          | 0.501      | 1.000              |
| hsa-miR-548m     | 0.953988          | 0.966239          | 0.506      | 1.002              |
| hsa-miR-1911-5p  | 0.960785          | 0.972291          | 0.503      | 1.000              |
| hsa-miR-675-3p   | 0.965139          | 0.975863          | 0.500      | 1.000              |
| hsa-miR-3607-3p  | 0.969329          | 0.979262          | 0.518      | 0.994              |
| hsa-miR-497-5p   | 0.970754          | 0.979865          | 0.507      | 0.998              |
| hsa-miR-1272     | 0.975764          | 0.984083          | 0.509      | 1.000              |
| hsa-miR-3915     | 0.976603          | 0.984089          | 0.506      | 1.000              |
| hsa-miR-3687     | 0.977588          | 0.984244          | 0.500      | 1.000              |
| hsa-miR-3191-3p  | 0.978617          | 0.984443          | 0.509      | 1.000              |
| hsa-miR-124-3p   | 0.980005          | 0.985000          | 0.508      | 0.998              |
| hsa-miR-548n     | 0.985278          | 0.988621          | 0.522      | 0.999              |
| hsa-miR-328-3p   | 0.985123          | 0.988621          | 0.504      | 0.976              |
| hsa-miR-648      | 0.988423          | 0.990936          | 0.504      | 1.000              |
| hsa-miR-548k     | 0.993077          | 0.994758          | 0.510      | 1.000              |
| hsa-miR-27a-5p   | 0.995684          | 0.996526          | 0.500      | 1.000              |
| hsa-miR-429      | 0.998972          | 0.998972          | 0.579      | 1.075              |

**eTable 13. Signature for the Comparison of NSCLC Versus SCLC.** The "largely matched" cohort comprises all samples of our study, which were chosen to have a similar age, gender and smoking status distribution.

| Cohort comparison | miRNA signature                                                                                                                   |
|-------------------|-----------------------------------------------------------------------------------------------------------------------------------|
| largely matched   | hsa-miR-122-5p,hsa-miR-181c-3p,hsa-miR-30a-5p,hsa-miR-3615,hsa-miR-3680-3p,hsa-miR-375,hsa-miR-378a-5p,hsa-miR-589-3p,hsa-miR-665 |



**eTable 14. Signature Overlap Between the Three Classification Scenarios.** For each miRNA contained in any of the signatures obtained via the training/validation set approach we mark the signatures where the miRNA is included. The table is sorted with respect to the number of signatures it was contained in a decreasing order.

|             | Scenario 1 | Scenario 2 | Scenario 3 | SUM |
|-------------|------------|------------|------------|-----|
| miR-3152-3p | X          |            | x          | 2   |
| miR-205-5p  |            | x          | x          | 2   |
| miR-101-5p  | X          |            |            | 1   |
| miR-1260b   | X          |            |            | 1   |
| miR-139-5p  | X          |            |            | 1   |
| miR-145-5p  | X          |            |            | 1   |
| miR-16-2-3p | X          |            |            | 1   |
| miR-30b-5p  | X          |            |            | 1   |
| miR-3115    | X          |            |            | 1   |
| miR-374c-5p | X          |            |            | 1   |
| miR-378b    | X          |            |            | 1   |
| miR-539-5p  | X          |            |            | 1   |
| miR-551b-3p | X          |            |            | 1   |
| miR-660-5p  | X          |            |            | 1   |
| miR-93-3p   | X          |            |            | 1   |
| miR-942-5p  | X          |            |            | 1   |
| let-7g-3p   |            | X          |            | 1   |
| miR-1202    |            | X          |            | 1   |
| miR-17-3p   |            | X          |            | 1   |
| miR-193a-5p |            | X          |            | 1   |
| miR-21-3p   |            | X          |            | 1   |
| miR-29c-5p  |            | X          |            | 1   |
| miR-3134    |            | X          |            | 1   |
| miR-4270    |            | X          |            | 1   |
| miR-4284    |            | X          |            | 1   |
| miR-452-3p  |            | X          |            | 1   |
| miR-625-3p  |            | X          |            | 1   |
| miR-625-5p  |            | X          |            | 1   |
| miR-744-5p  |            | X          |            | 1   |
| miR-1285-3p |            |            | X          | 1   |
| miR-144-5p  |            |            | X          | 1   |
| miR-16-5p   |            |            | X          | 1   |
| miR-374b-5p |            |            | X          | 1   |
| miR-505-3p  |            |            | X          | 1   |

**eTable 15. An Overview of Studies on miRNA Expression Changes in Lung Cancer.**

The table lists whether a miRNA was selected because it was among the 15 most significant in the ANOVA, included in any of the three signatures, the number of manuscripts and the PubMed ids for rather descriptive and rather functional studies describing the role of the miRNA in lung cancer. Please note that it was not always possible to assign a miRNA unambiguously to one of the two groups. Scenario 1 compares lung cancer patients to all other individuals. Scenario 2 compares lung cancer to non-tumor lung disease patients. Scenario 3 compares patients with lung cancer stage 1-2 to all other non-lung-cancer patients.

| miRNA           | top 15 | scenario 1 | scenario 2 | scenario 3 | SUM | diagnosis / prognosis / correlation                                  | functional                                                                                                   |
|-----------------|--------|------------|------------|------------|-----|----------------------------------------------------------------------|--------------------------------------------------------------------------------------------------------------|
| hsa-miR-193a-3p | x      |            |            |            | 13  | 26629532, 20620595                                                   | 30685413, 30036873, 30036873, 29321960, 29183007, 27669434, 26655272, 26257582, 25833338, 25391651, 24469061 |
| hsa-miR-142-3p  | x      |            |            |            | 9   | 23410826, 19010987                                                   | 30362621, 29704494, 29137392, 28427045, 28346809, 26617792, 24558198                                         |
| hsa-miR-205-5p  |        | X          | x          | x          | 8   | 29103030, 29095265, 28498428, 28445945, 27743380, 23881177, 30678026 | 28350117                                                                                                     |
| hsa-miR-139-5p  |        | X          |            |            | 7   | 30614351, 28698868, 23945385                                         | 30153566, 26497851, 26256448, 26097570                                                                       |
| hsa-miR-144-3p  | x      |            |            |            | 6   | 30832674, 27811377                                                   | 30280514, 30108506, 29492259, 30121641                                                                       |
| hsa-miR-1285-3p |        | X          | x          | x          | 3   | 27517633; 27753015; 26232753                                         |                                                                                                              |
| hsa-miR-1260b   |        | X          |            | x          | 3   |                                                                      | 26618049, 29628123, 30737371                                                                                 |
| hsa-miR-18a-5p  | x      |            |            |            | 3   |                                                                      | 26859758, 28471447, 29860718                                                                                 |
| hsa-miR-23b-3p  | x      |            |            |            | 3   | 28055956, 26314549                                                   | 26227219                                                                                                     |
| hsa-miR-21-3p   | x      |            | x          |            | 2   | 23881177                                                             | 26859758                                                                                                     |
| hsa-miR-564     |        |            |            | x          | 2   |                                                                      | 26498524, 29164580                                                                                           |
| hsa-miR-106b-5p | x      |            |            |            | 2   |                                                                      | 29197876, 28723865                                                                                           |
| hsa-miR-93-3p   |        | X          |            |            | 2   | 29683761, 21388703                                                   |                                                                                                              |
| hsa-miR-18a-3p  |        | X          |            |            | 1   |                                                                      | 29042600                                                                                                     |
| hsa-miR-516a-3p |        |            | x          |            | 1   |                                                                      | 25480945                                                                                                     |

| miRNA           | top 15 | scenario 1 | scenario 2 | scenario 3 | SUM | diagnosis / prognosis / correlation | functional                                                                     |
|-----------------|--------|------------|------------|------------|-----|-------------------------------------|--------------------------------------------------------------------------------|
| hsa-miR-338-3p  | x      |            |            |            | 1   | 28698868                            | 30811684, 30554121, 28428733, 28231299, 28123847, 27453416, 27186391, 25374067 |
| hsa-miR-15a-5p  | x      |            |            |            | 1   | 30019650                            |                                                                                |
| hsa-miR-1202    |        | X          | x          |            | 0   |                                     |                                                                                |
| hsa-miR-1260a   |        | X          |            | x          | 0   |                                     |                                                                                |
| hsa-miR-378b    |        | X          |            | x          | 0   |                                     |                                                                                |
| hsa-miR-3152-3p |        | X          |            | x          | 0   |                                     |                                                                                |
| hsa-miR-16-2-3p |        | X          |            |            | 0   |                                     |                                                                                |
| hsa-miR-551b-3p |        | X          |            |            | 0   |                                     |                                                                                |
| hsa-miR-17-3p   | x      |            | x          | x          | 0   |                                     |                                                                                |
| hsa-miR-4286    | x      |            | x          |            | 0   |                                     |                                                                                |
| hsa-let-7g-3p   |        |            | x          |            | 0   |                                     |                                                                                |
| hsa-miR-625-5p  |        |            | x          |            | 0   |                                     |                                                                                |
| hsa-miR-193a-5p |        |            | x          |            | 0   |                                     |                                                                                |
| hsa-miR-4282    |        |            | x          |            | 0   |                                     |                                                                                |
| hsa-miR-452-3p  |        |            | x          |            | 0   |                                     |                                                                                |
| hsa-miR-3610    |        |            | x          |            | 0   |                                     |                                                                                |
| hsa-miR-572     |        |            | x          |            | 0   |                                     |                                                                                |
| hsa-miR-374b-5p | x      |            |            | x          | 0   |                                     |                                                                                |
| hsa-miR-18b-5p  | x      |            |            |            | 0   |                                     |                                                                                |
| hsa-miR-301a-3p | x      |            |            |            | 0   |                                     |                                                                                |
| hsa-miR-374c-5p | x      |            |            |            | 0   |                                     |                                                                                |
| hsa-miR-188-3p  | x      |            |            |            | 0   |                                     |                                                                                |
| hsa-miR-3907    | x      |            |            |            | 0   |                                     |                                                                                |

miRNAs from the study by Leidinger et al, 2011 (PMID: 21388703)

| miRNA           | Expression  |
|-----------------|-------------|
| hsa-miR-662     | up in Lca   |
| hsa-miR-93-3p   | up in Lca   |
| hsa-miR-940     | up in Lca   |
| hsa-let-7d-3p   | up in Lca   |
| hsa-miR-92a-3p  | up in Lca   |
| hsa-miR-636     | up in Lca   |
| hsa-miR-328-3p  | up in Lca   |
| hsa-miR-1224-3p | up in Lca   |
| hsa-miR-675-5p  | up in Lca   |
| hsa-miR-369-5p  | down in Lca |
| hsa-miR-641     | down in Lca |
| hsa-miR-383-5p  | down in Lca |
| hsa-miR-26a-5p  | down in Lca |
| hsa-miR-513b-5p | down in Lca |
